# Supplementary material
Source: PubMed Central journal article supplement (PMC4902593)
Supplement: supp_pp.16.00056_00056suppdata.pdf [file supp_pp.16.00056_00056suppdata.pdf]

1 10 20 30 40 50 60  
AT5G49160\_MET1 MVENGAKAAKRKRPLPEI.....QVEVDVPRPT.....RRPRRAAACTSFKEKSIKRVCEKKSATIEVKKQIVPE  
29983.m003308\_MET1 .....MKNKKGPKSSVSK..ANKEQINNIKEK.....KRSSSQKNEEPAGSKRKPRAAACTDFKEKAVRLSDKSSVLESRRDQFADD  
29609.m000606\_MET1 .MVSREVEVSEKAPFSDNNKKTGAAEDTNIQESKPENGDGAASKVKLKRGLSKNVENVYSSRKMTRAAACSDFKKEPLDFSEEYSFTIKKQVIVHE

70 80 90 100 110 120 130 140 150 160  
AT5G49160\_MET1 EFLALRLTALLETDEVDLRFTRRLNDFVLFDSGVFQPLEMIEIHDIFVSGATLPSDVCTDKKKEKGVRCVTSFGRVEHWSISGYEDGSPVIWISITLADYDC  
29983.m003308\_MET1 EILAVLTHGQDDG..RPNRRLDFVVDENGTFOPLEMIEVDDMFISGLTLPDENPKKKEKRRVRCVTSFGRVEHWSISGYEDGSPVIWISITLADYDC  
29609.m000606\_MET1 EAVALRLTAGRDL..RPNRRLDFVVDENGTFOPLEMIEVDDMFISGLTLPDENPKKKEKRRVRCVTSFGRVEHWSISGYEDGSPVIWISITLADYDC

170 180 190 200 210 220 230 240 250 260  
AT5G49160\_MET1 FKPAASVYKVVYDFYFEKARASVAVYKKLSSKSSGCPDGLDELAVVVRMSVSGSKYFSSGAAIDDFVISQGFYIYNQLAGLDTAKKHSSYVEIPVLLV  
29983.m003308\_MET1 LKPANNYKFKVDFHFEKARACILVYKKLSSKSSGCPDGLDELAVVVRMSVSGSKYFSSGAAIKDFVISQGFYIYNQLAGLDTAKKHSSYVEIPVLLV  
29609.m000606\_MET1 IKPANRYKFKVDFHFEKARACVAVYKKLSSKSSGCPDGLDELAVVVRMSVSGSKYFSSGAAIKDFVISQGFYIYNQLAGLDTAKKHSSYVEIPVLLV

270 280 290 300 310 320 330 340 350  
AT5G49160\_MET1 ATRKSSK....IDKPLQRERNPSNGVRIKEVS..QVAESFALTSDQLVDGTDDRRYATLQDEENRKSQPRKNSSSGASNMFYIKINEDEIAND  
29983.m003308\_MET1 ATRDKSEEHGDFVLAQAVT...SGNLTLYQKFGDSVSNVNSQSISSAA.GEDDEAKLARLQDEEYQWTKKQKHGSASSSNTIYIKINEDEIAND  
29609.m000606\_MET1 AMRDEKKKREGLFMHEATTTRTVNRNLTIDGKL.....TNQLISSLA.EEDDEMKLASRQEVNWLMSKQNKRRFSVPSH..FYIKINEDEIAND

360 370 380 390 400 410 420 430 440  
AT5G49160\_MET1 YPLPSYKTSSEETDELILYDASY..EVQSEHLRHRMLHNVLYNSDLRFISLELLPMPKQCDIDVNFSGSVVTDNGSWISLNDP...SGSQSH  
29983.m003308\_MET1 YPLPVAATNCSDEETDEYLAIDTEEHIMVDPDELKRRMLHNVLYNSDLRFISLELLPMPKQCDIDVNFSGSVVTDNGSGFSLDDDDQSSSAGSQAQ  
29609.m000606\_MET1 YPWPYKTSSEETDEFLVICDE..IFNP...EENVLHNVLYNSDLRFISLELLPMPKQCDIDVNFSGSVVTDNGSGFSLDDDDQSSSAGSQAQ

450 460 470 480 490 500 510 520 530 540  
AT5G49160\_MET1 DDPGMCIFLSQIKEMWIEFGSDDIISISRTDVAWYRLGKPSKIYAPWVKPVLTARVGIISITLFLRVSRVARSLSFADVTKRISGLQANDKAVISSDPL  
29983.m003308\_MET1 DDPGLPIFLSAIKEMWIEFGS.SMVVISIRTDMAWYRLGKPSKIYAPWVKPVLTARVGIISITLFLRVSRVARSLSFADVTKRISGLQANDKAVISSDPA  
29609.m000606\_MET1 D.VGLPIVYSAIKEMWIEFGS.SMIFISRTDLSWYRLGKPSKIYAPWVKPVLTARVGIISITLFLRVSRVARSLSFADVTKRISGLQANDKAVISSLAA

550 560 570 580 590 600 610 620 630 640  
AT5G49160\_MET1 AVERYVVHGQIILQLFAVYFDDNKKRQCFVVGTAASKLEDRHHTKWIKKKISLREL.NLNPRAGMA...PVA SKRKAMQATTRLVNRRIWGEYYSNYS  
29983.m003308\_MET1 TVERYVVHGQIILQLFAEFPDEKIKKCAFAVVGTAASKLEDRHHTKWIKKKILQKNQPNLNPRAAAMSSMAPVVS KRKAMQATTRLVNRRIWGEYYSNYS  
29609.m000606\_MET1 BVERYVVHGQIILQLFSEFPVKAIQNCFVVTGTAASKMQINHTKWLKRVKRLVLRGL.NLNPREAVA...TISERKAMQATTRLVNRRIWGEYYSNYS

650 660 670 680 690 700 710 720 730 740  
AT5G49160\_MET1 PEDPLOATAAENGEDEVEFEGNGEVEFEEENGLTETVPEPEVQKPHPKKIRG.SSGKREIKWDGESLGTSAAGEPLVQALVCEMVAVVGAVT  
29983.m003308\_MET1 PEDLKBATNCEAKEE...DEV...EQEENDDAEKLLLSDKTKAKASMSS.RTKSYSKDEVLWDGNPVS KTHSGEAIWNSAIVEGVIKVAAVY  
29609.m000606\_MET1 PESNCA DGLIKED...DEVVEEQESEEEDSEIEEKMEIEKSKERTRSTEKLNTWQCSNQERLWVGGLLKSCTKGKAFVWKGAVGGIVADDFVM

750 760 770 780 790 800 810 820 830 840  
AT5G49160\_MET1 LEVDDDEMPAIFYVEYMFESTDHCMMHGRFLLQRGSMFVLGNANERELTNECMTTOLKDIKGVASFERSRPFWGHQYRKKNITADKLDWARALERK  
29983.m003308\_MET1 LEVDESDELPAIFYVEYMFESTSGGSKMHGRVMOHGSFTLGNANERELTNECMTTOLKDIKGVASFERSRPFWGHQYRKKNITADKLDWARALERK  
29609.m000606\_MET1 LGTTDADQLSPIFYVEYMFENSDMRKMAHGRKMLYGSQFVLGNANERELTNECMTTOLKDIKGVASFERSRPFWGHQYRKKNITADKLDWARALERK

BAH-I

850 860 870 880 890 900 910 920 930 940  
AT5G49160\_MET1 VKDLPTEYCKSLYSPERGFSSLPFLSDIRGSSCFCTSCKIREDEEKRSTIKLVNSKTGFFINGI EYSD EYVYVNPDSIGLKEGSKTSFKSGRNIGLR  
29983.m003308\_MET1 KKGLPTEYCKSMYWPERGAFFSLPFLSDIRGSSCFCTSCKIREDEEKRSTIKLVNSKTGFFINGI EYSD EYVYVNPDSIGLKEGSKTSFKSGRNIGLR  
29609.m000606\_MET1 CKGLPTEYCKSYLPERGAFFCISLSDIRGSSCFCTSCKIREDEEKRSTIKLVNSKTGFFINGI EYSD EYVYVNPDSIGLKEGSKTSFKSGRNIGLR

950 960 970 980 990 1000 1010 1020 1030 1040  
AT5G49160\_MET1 AYVVCQLEIIVPKESRKADLGSFVVKVRRFRYRPEVDSSKAYASDIQELIYFSQDITVLLPAGALGKCEVRKSDMPLSREYPTSDHIFFCBHLFDTSKG  
29983.m003308\_MET1 AYAVVCQLEIIVPKESRKADLGSFVVKVRRFRYRPEVDSSKAYASDIQELIYFSQDITVLLPAGALGKCEVRKSDMPLSREYPTSDHIFFCBHLFDTSKG  
29609.m000606\_MET1 AYVVCQLEIIVPKESRKADLGSFVVKVRRFRYRPEVDSSKAYASDIQELIYFSQDITVLLPAGALGKCEVRKSDMPLSREYPTSDHIFFCBHLFDTSKG

BAH-II

1050 1060 1070 1080 1090 1100 1110 1120 1130 1140  
AT5G49160\_MET1 SLKQLPAMNPKPKFST..IKDDTLRKKKGGKGVSEISEI.VKPEVPPKEIRLATLDFIFACGGGLSGLKAGVSDAKWAIYEYEPAGBAFKQNHPESTV  
29983.m003308\_MET1 SLKQLPAHIKLRYSSTGTQESDAASRKKKCKCKEEDDEVEN...KREATQGRRLATLDFIFACGGGLSGLKAGVSDAKWAIYEYEPAGBAFKQNHPESTV  
29609.m000606\_MET1 TIKQLPAHIKLRSSSKERMNDLILYRKKKCKCKEEDDEVEN...KREATQGRRLATLDFIFACGGGLSGLKAGVSDAKWAIYEYEPAGBAFKQNHPESTV

1150 1160 1170 1180 1190 1200 1210 1220 1230 1240  
AT5G49160\_MET1 FVNDNCNVILRAEMKGDQDDCVSTTEANELAAKLTIEQKSTLPLFGQVDFINGGPPCQGFSGMNRFSQSSWSKVQCEMILAFLSFADYFRPKVFLLENV  
29983.m003308\_MET1 FVNDNCNVILRAEMKCGDQDDCVSTTEANELAAKLTIEQKSTLPLFGQVDFINGGPPCQGFSGMNRFSQSSWSKVQCEMILAFLSFADYFRPKVFLLENV  
29609.m000606\_MET1 LINDNCNVILRAEMKCGDQDDCVSTTEANELAAKLTIEQKSTLPLFGQVDFINGGPPCQGFSGMNRFSQSSWSKVQCEMILAFLSFADYFRPKVFLLENV

1250 1260 1270 1280 1290 1300 1310 1320 1330 1340  
AT5G49160\_MET1 RNFVSNKGTPTQLTASLLEMGYQVRFCTLEAGAYGVSSSRKRAFIWAAAPPEVLPPEWPEPMHVFVGPPELKIISLSQGLHYAAVRSSTAGAPFRATITVRD  
29983.m003308\_MET1 RNFVSNKGTPTQLTASLLEMGYQVRFCTLEAGAYGVSSSRKRAFIWAAAPPEVLPPEWPEPMHVFVGPPELKIISLSQGLHYAAVRSSTAGAPFRATITVRD  
29609.m000606\_MET1 RNFVSNKGTPTQLTASLLEMGYQVRFCTLEAGAYGVSSSRKRAFIWAAAPPEVLPPEWPEPMHVFVGPPELKIISLSQGLHYAAVRSSTAGAPFRATITVRD

VII

VIII

1350 1360 1370 1380 1390 1400 1410 1420 1430 1440  
AT5G49160\_MET1 TIGDLFVSENGDSRTNKEYKEVAVSWFQREIRGNTIALTDHISKAMNELNLIRCKIIPTRPGADWHDLPKRVKLSLSDGRVEEMIFCLPNTAERHNGWK  
29983.m003308\_MET1 TIGDLFVSENGDSRTNKEYKEVAVSWFQREIRGNTIALTDHISKAMNELNLIRCKIIPTRPGADWHDLPKRVKLSLSDGRVEEMIFCLPNTAERHNGWK  
29609.m000606\_MET1 TIGDLFVSENGDSRTNKEYKEVAVSWFQREIRGNTIALTDHISKAMNELNLIRCKIIPTRPGADWHDLPKRVKLSLSDGRVEEMIFCLPNTAERHNGWK

1450 1460 1470 1480 1490 1500 1510 1520  
AT5G49160\_MET1 LYGRLDWQGNFPTSVDTPQPMGKVGCMCFHPEQDRILTVRECARSGQFSDSYKFAAGNIHKHROIGNAVPPPLAALGKRLKEALHLLKKS.....  
29983.m003308\_MET1 LYGRLDWQGNFPTSVDTPQPMGKVGCMCFHPEQDRILTVRECARSGQFSDSYKFAAGNIHKHROIGNAVPPPLAALGKRLKEALDGRLLK.....  
29609.m000606\_MET1 LYGRLDWQGNFPTSVDTPQPMGKVGCMCFHPEQDRILTVRECARSGQFSDSYKFAAGNIHKHROIGNAVPPPLAALGKRLKEAVEMKRSLSVRCICNYCT

IX

X

1 10 20 30 40  
AT5G14620\_DRM2 . . . . . MVIWNN.DDDDFLEIDNFQSSPRSSP. . . . . IHAMQCRVENLAGVAVTTSSLSSP. . . . .  
AT5G15380\_DRM1 . . . . . MVMSHIFLISQIQEVEHGDSDDVNWN. . . . . TDDDELAIDNFQ. . . . . FSPSPVHIS. . . . .  
29917.m001982\_DRM MGVIIVYCFRITTCCKPVYMEHKTLYLEILGIAVASKEMDGDSDFCGEGDNFDWSEDEREIEENFGLTNSCLAVPAVEATARSVEKCLMG  
29631.m001043\_DRM . . . . . MDR. . . . . FLSLVN VLLKHVT. . . . .  
29889.m003366\_DRM . . . . . MQLISFSNSNAVLWSLTAEASGHDKMRKVHNG. . . . . ETSSNQKTTVPKPEMLDFDFPSDFIYS. . . . .

50 60 70 80 90 100 110 120  
AT5G14620\_DRM2 . . . . . TETTDLVQMGFSDEVFA TLFDMGFPVEMISRAIKETG.PNVEETSVI I D TISKYS SDCEAGSSKSKAIDHFLA. . . . .  
AT5G15380\_DRM1 . . . . . ATSPNSIQNRISDETVASFVEMGFSTQMIARAIEETAGANMEPMMIL E TLFNYS ASTEASSSKSKVINHFIA. . . . .  
29917.m001982\_DRM FSCILRHASSSSVRSSGTKVMDHFVGMGFPEKMAEA IQENGEENAD. . . . . LILETLLKFSTISSPSSGSKLIDHFVG. . . . .  
29631.m001043\_DRM . . . . . LKRQNSILRS. . . . . QAN. . . . . SLTGCS SRMVHQFVN. . . . .  
29889.m003366\_DRM . . . . . SQLGE TAASSSASDVRS FLTGMGFLPSLVDKV IQENGEDNVD. . . . . LLEILMECS DPQKSN SQSSDSLDTL FNDKDASNPPEYSK

UBA-I

130 140 150 160 170 180  
AT5G14620\_DRM2 . . . . . MGFDEEKVVKAIQEHGEDNMEA IANALLS CPEAKKLPAAVEEEDGIDWSSSDDDTNYTDM LNSDD  
AT5G15380\_DRM1 . . . . . MGFPEEHVIKAMQEHGEDVDGEITNALLT YAEVDKLRSEDMN. . . . . ININDDDDDNLYS. . . . . LSSDD  
29917.m001982\_DRM . . . . . MGFVEMVDRAIQENGE EKTD SILETLLT YSVIEKSHQE QPHVDS DHWSSEYEGSFLNDFSDIDS  
29631.m001043\_DRM . . . . . MGFSEKLVMAIDENGEDE.AS ILDSLLT YSLRKE. . . . .  
29889.m003366\_DRM FGQPKEEPDVFGFDDSKRASLLHMNFSAE EVDFAMEKLGTDAPVDEIVDFIT AAQVAANFDEERDDELEHDVEQNKYCSRHSRMNPSH

UBA-II

190 200 210 220 230 240 250  
AT5G14620\_DRM2 EKD. . . . . PNSNE. . . . . NGS KIRSLVKMGFSELEASL AVERRCGENVDIA ELTDFLCAA QMAR. . . . . EFS E F Y TEHEEQKPRHN  
AT5G15380\_DRM1 EEDELNNSN. . . . . EDRILQALIKMGYLREDAAI AIERCGEDASME EVVDFICAA QMAR. . . . . QFDEIYAEPDKKELMNN  
29917.m001982\_DRM SENEENGKSPVEGN TLRFLARMGYTTDEASI ALERCGPDANIA ELTDFICAA QMAKAADASFPEEKPKIRHFDDY PKNKKNRYAEY  
29631.m001043\_DRM . . . . .  
29889.m003366\_DRM VARGGESFNMEIRDE QRRDSYGRKKPENLSQE AVSRSSNLNLEE IHRGKRPKQ EYTEG. . . . . YSNTQDEHFGFEENYE

USA-III

260 270 280 290 300 310 320 330  
AT5G14620\_DRM2 I. . . . . KKRRFESKGEPRSSVDDEPIR LPNP MI GFGV P N EP GLITH R. . . . . SLPEL AR GPPFFFYENVAL T PKGVWET ISRH LFEI P PEFVDS  
AT5G15380\_DRM1 N. . . . . KKRRTYTET.PRKPNTDQLIS LPKEMI GFGV P N HP GLMMHR PVPIPDIA AR GPPFFFYENVAM T PKGVWAK ISSH LYDI V PEFVDS  
29917.m001982\_DRM DMW KK KKQMKLDKLLNGDDELIR LPNP ML GFGV P T DP AIVTHR. . . . . KLPEA AL GPPFFFYENVAL A PKGVWQT ISRF LYDV E PEFVDS  
29631.m001043\_DRM RSS KS QESKRKAKNFLERNR TLH LPNP MI GFGI P H EP WKITER. . . . . KLHP IA V GPPYFYENAA L T PKGVWSK ISSF LYDI Q PEFVDS  
29889.m003366\_DRM EEGP K PEYTADSSFSFESAWVEEK VDT EIT GFRI P R EP KFKSCK. . . . . SVDRMVA K P P Y F L Y G N V A T V S L D T W G K I S Q F L Y A V E P E F V N T

VI

340 350 360 370 380 390 400 410 420  
AT5G14620\_DRM2 K Y F C V A A R K R G Y I H N L P I N N R F Q I Q P P P K Y T I H D A F P L S K R W W P E W D K R T K L N C I . L T C T G S A Q L T N R I R V A L E P Y N E E P E P P K H V Q R  
AT5G15380\_DRM1 K H F C A A A R K R G Y I H N L P I Q N R F Q I Q P P Q H N T I Q E A F P L T K R W W P S W D G R T K L N C L . L T C I A S S R L T E K I R E A L E R Y D G . . E T P L D V Q K  
29917.m001982\_DRM K Y F C A A A R K R G Y V H N L P I Q N R Y P L L P L P P N N I H E A L P L T K R W W P S W D T R T K L N C L . Q T C V A S A K L T D R I R K A L E D Y E G . . E P P L S I R K  
29631.m001043\_DRM I Y F C A A A R K R G Y V H N L P I Q N R F P L L P R P P L T I H E V L P S T E K W W P S W D K R T K L N C L . L T S Y G N A K L T E C I R K A L E D C D G . . E P T L R A K K  
29889.m003366\_DRM Q F F S A L S R K E G Y V H N L P T E N R F H I L P K P P M S I L D A M P H I K K W W P S W D T R K Q L S F I N Y E T N G L S Q L C D R L G R M L T D S R G . . L I S S Q Q K R

430 440 450 460 470 480 490 500 510  
AT5G14620\_DRM2 Y V I D Q C K K W N L V W V G K N K A A P L E P D E M E S I L G F P K N H T R G G G M S R T E R F K S L G N S F Q V D T V A Y H L S V L K P I F P H G I N V L S L F T G I G G G  
AT5G15380\_DRM1 W V M Y E C K K W N L V W V G K N K L A P L D A D E M E K L L G F P R D H T R G G G I S T D R Y K S L G N S F Q V D T V A Y H L S V L K P L F P N G I N V L S L F T G I G G G  
29917.m001982\_DRM Y V L D E C R K W N L L W V G R N K L A P L E P D E V E M L L G F P R N H T R G G G I S R T D R Y K S L G N S F Q V D T V A Y H L S V L K D M F P E G I S L L S L F S G I G G A  
29631.m001043\_DRM Y V L E Q C K R W N L V W V G K N K V A P L E P D E M E M L L G F P K D H T R G G G I N R N D R Y K A L G N S F Q V D T V A Y H L S V L K N L F P Y G I T V L S L F S G I G G A  
29889.m003366\_DRM D I L H H C H K L N L V W V G L H K V R P I E P E H L E L I L G Y P L N H T Q T T E G S L T E R L H A L R Y S F Q I D T L G Y H L S V L K S M F P E G I T V L S L F S G I G G A

IX

X

I

520 530 540 550 560 570 580 590 600  
AT5G14620\_DRM2 E V A L H R L Q I K M K L V V S V E I S K V N R N I L K D F W E Q T N Q T G E L I E F S D I Q H L T N D T I E G L M E K Y G G F D L V I G G S P C N N L A G G N R V S R . . V G  
AT5G15380\_DRM1 E V A L H R L Q I K M N V V V S V E I S D A N R N I L R S F W E Q T N Q K G I L R E F K D V Q K L D D N T I E R L M D E Y G G F D L V I G G S P C N N L A G G N R H H R . . V G  
29917.m001982\_DRM E V A L H R L G I R L K R V V S V E I S E V N R N I M R C W W E Q T N Q T G T L I D I A D V H D L N A D R L E Q L M S S F G G F D L V V G G S P C N N L A G S N R H H R . . D G  
29631.m001043\_DRM E V A L H R L G I P L N S V V S V E I S E V N R N I P R S W W E Q T N Q K G Y L I E I G D V R E V D G D S I K R W I K L F G G F D L V I G G S P C N N L A G A N R R N R . . D G  
29889.m003366\_DRM E V A L H R L G I H M K G V V S V E T S E T K R K I L R M W W R N S G Q T G E L E Q I E D I Q K L T T K K I D R L I E R F G G F D F V I C Q S P C T C A S G N P K M E Q R A D A

II

III

IV

610 620  
AT5G14620\_DRM2 L E G D Q S S L F F E Y C R I L E V V R . . . . . A R M R G S . . . . .  
AT5G15380\_DRM1 L G G E H S S L F F D Y C R I L E A V R . . . . . R K A R H M R R . . . . .  
29917.m001982\_DRM L E G K E S S L F F D Y C R I L D L V K . . . . . C I M T R N . . . . .  
29631.m001043\_DRM L E G E Q S S L F Y D Y Y R I L K L V R D T F G E I M D S E I L N R I L S Y P D L  
29889.m003366\_DRM R S A L D F S L F C E F V R V L Q R V R . . . . . T Q V Q R K R . . . . .

V

AT5G25480\_DNMT2  
 29848.m004665\_DNMT2

1 10 20 30 40 50 60 70 80  
 MAEQE LQRI NEKK PWQ VLEFYSGIGGMRYSLMAS GIVSE VVEAFEINDS ANDVYQHNF KHRPYQGNIQSLTAADLDKYNADAWLLS  
 MEAGF VKGNE . . PWR ILEFYSGIGGMRYSLMKA GVN AKVMEAFDINNI ANDAYE HNF GHRPYQGNIQSLTAADLD SYAAHAWLLS

I III

90 100 110 120 130 140 150 160 170  
 PPCQPYTRQGLQKHSGDARAFSFLR ILELIPHTTK PPQMLFVENVVGFFETS DTHME MI GT LTKLD YVTOEFILSPLQFGVPYSRPR  
 PPCQPYTRQGLQKHSGDARAFSFLR ILELIPHTKQ PPHMLFVENVVGFFETS DTR TNMVEI LANS GEVTOEFILSPLQFGIPYSRPR

IV VI VIII

180 190 200 210 220 230 240 250  
 YFCLAKRKPLP FKSQHS NNLWSPD PLYGRDD . QVEFGKCQAE EGLDKLLEF CKPVEK FLELAAHVD GEPSSVD . . DSENGSKDC  
 YFCLAKRKPLP FQHKYI NHQLWVSLG PLEGHDEG TVADRYDQSPESWDKLLQS CEPVVS FLEFKNSSNGVDAETDFVAITNDSGL

260 270 280 290 300 310 320 330 340  
 CGQE GDSVPD SVH OYLVP VSLIERWGNAMDIVYPDSK RCCCFTKSYYRYVKGTG SLLATVQPK IKGK E SCLKEQR LRYFTPREVAN  
 EN . T GEGNLT TMD QYI VPS N LIERWGSAMDIVYPDSN RCCCFTKSYYRYVKGTG SLLATVQPK EKGK TSSLHEKG LRYFTPREVAN

CTF

350 360 370 380  
 FHSFPEDFEFPKHISLRQRY . . . . . AMLGNS . LSVAVVAPLLR . . YLFD S . . . . .  
 LHSFPEDFEFPKHISLRQLSISFVGSMMFDDAP LTVCR LAIGSRDHHQV ESWSGKGGKIS

X





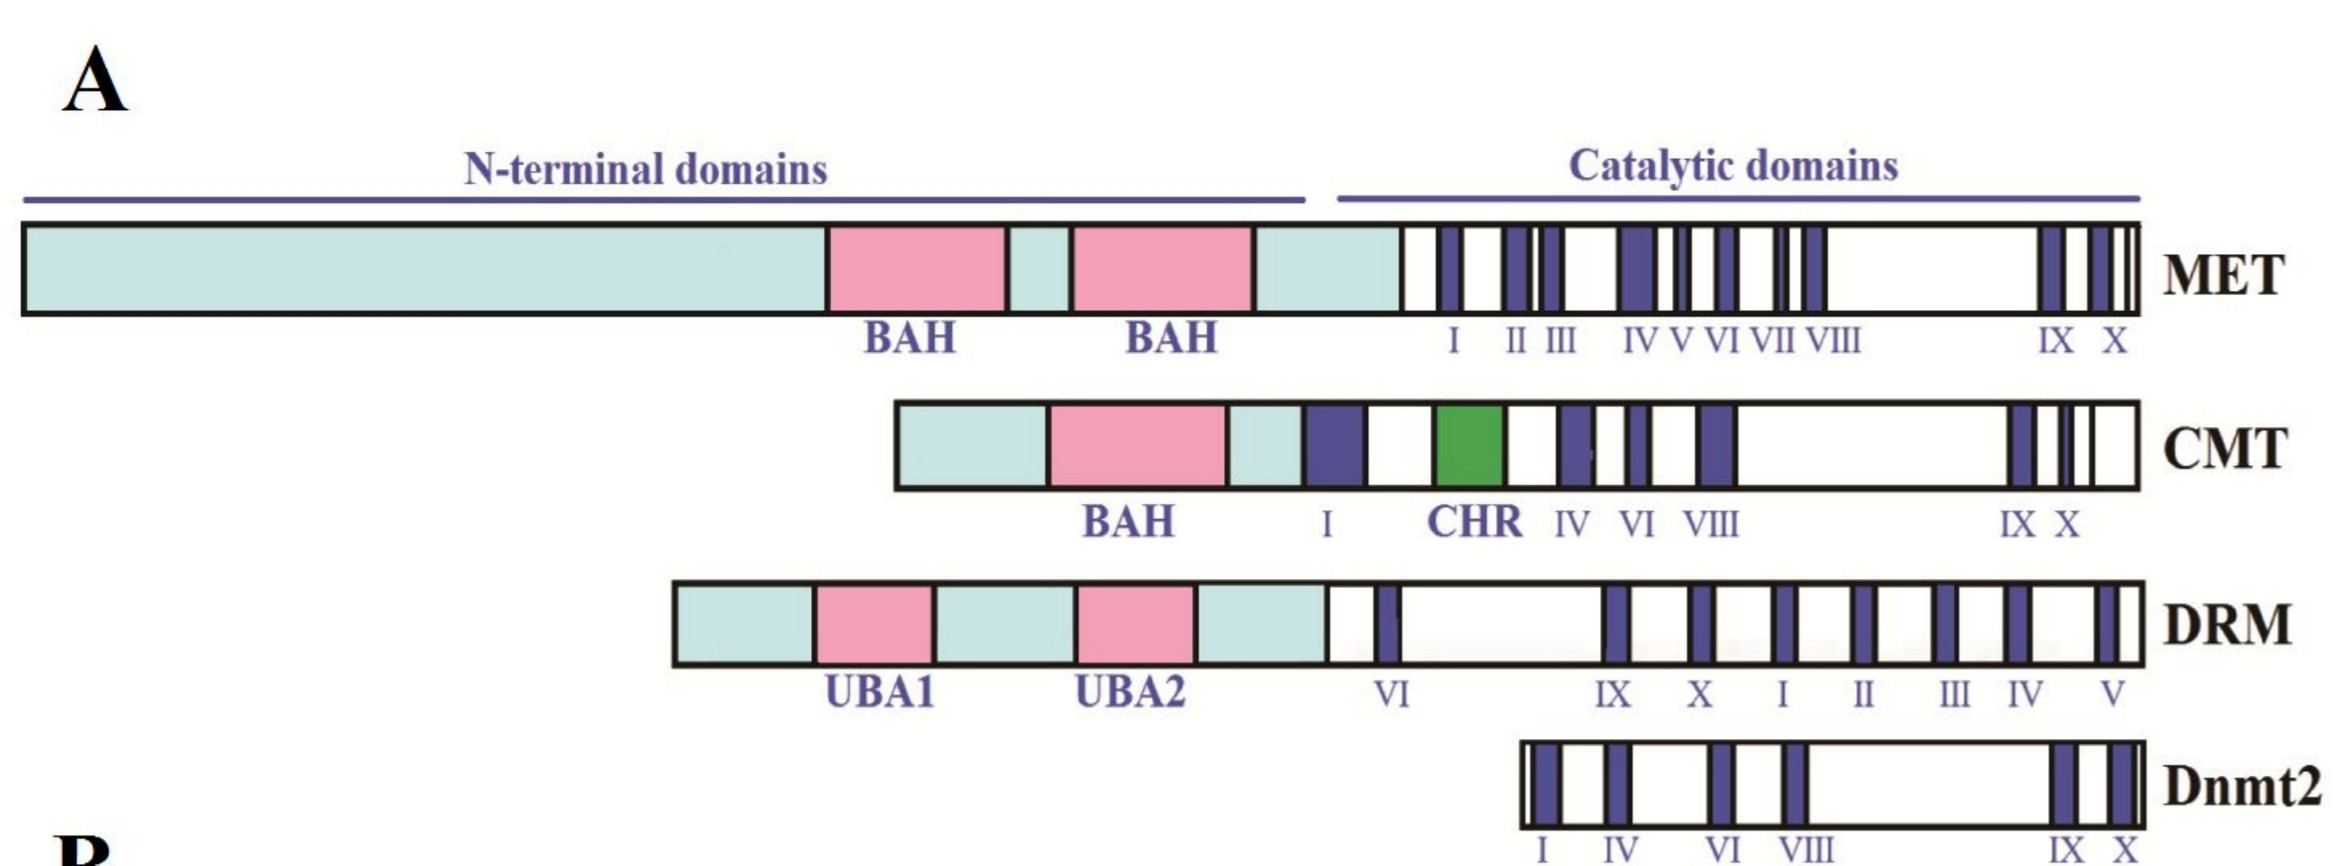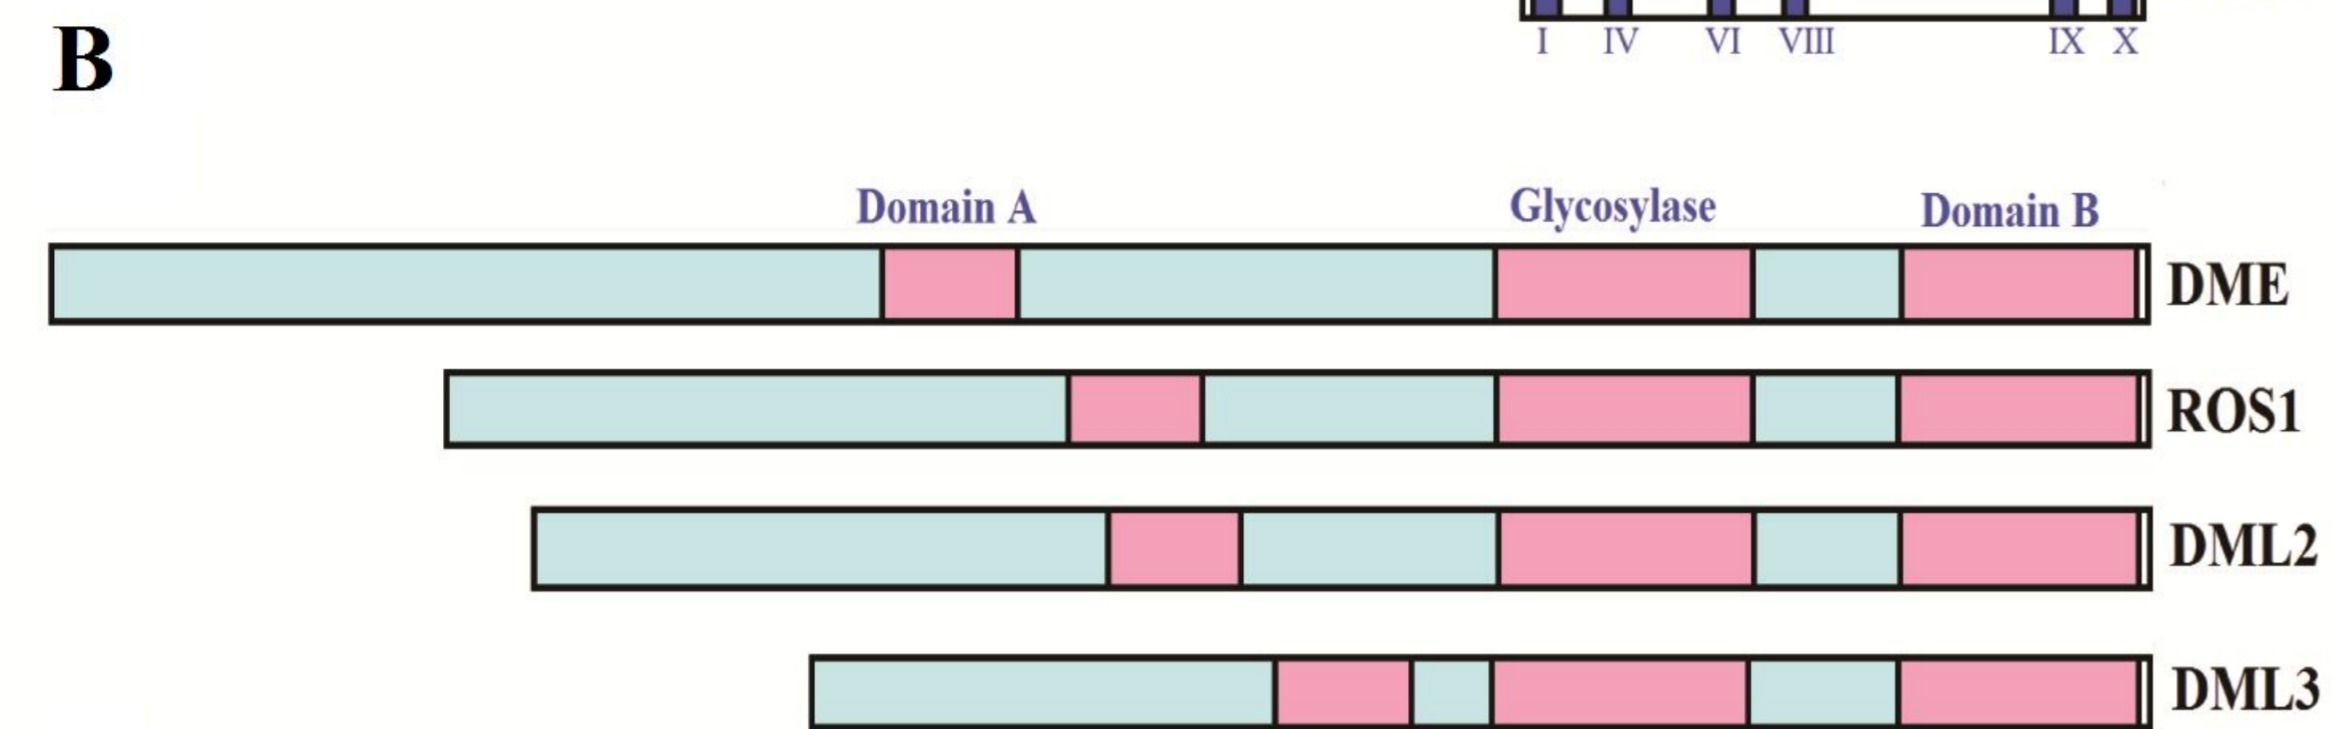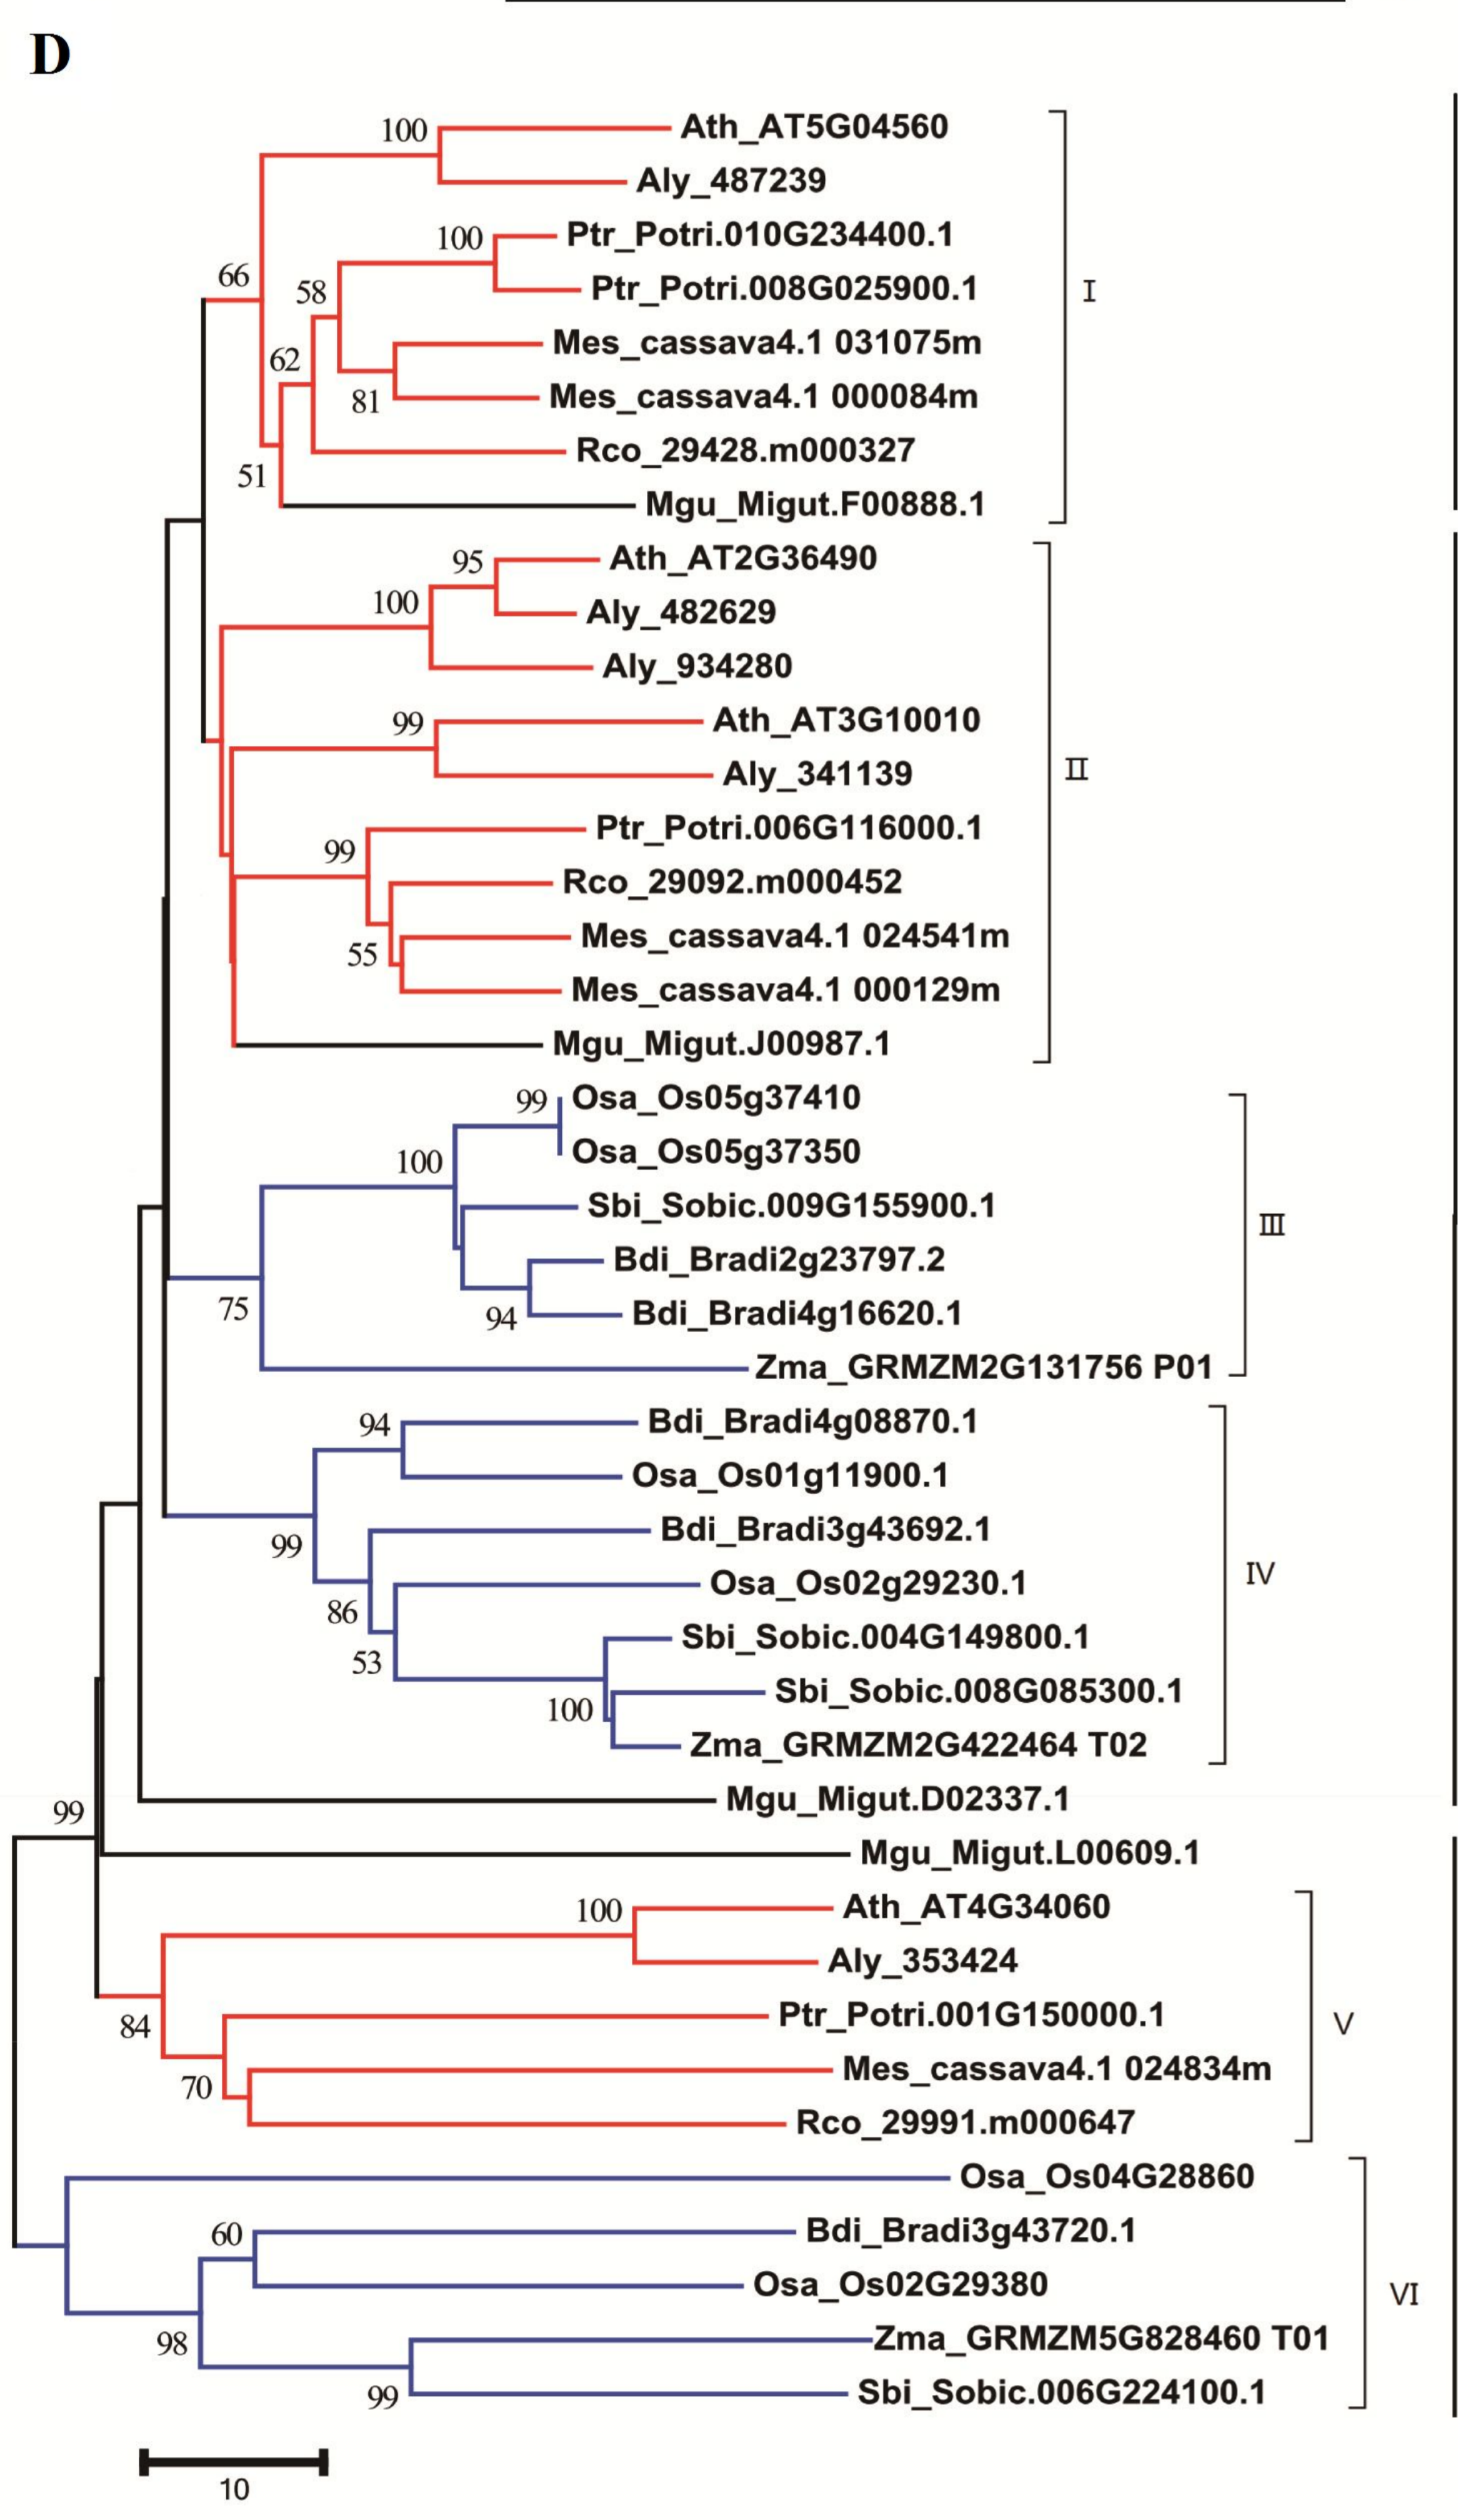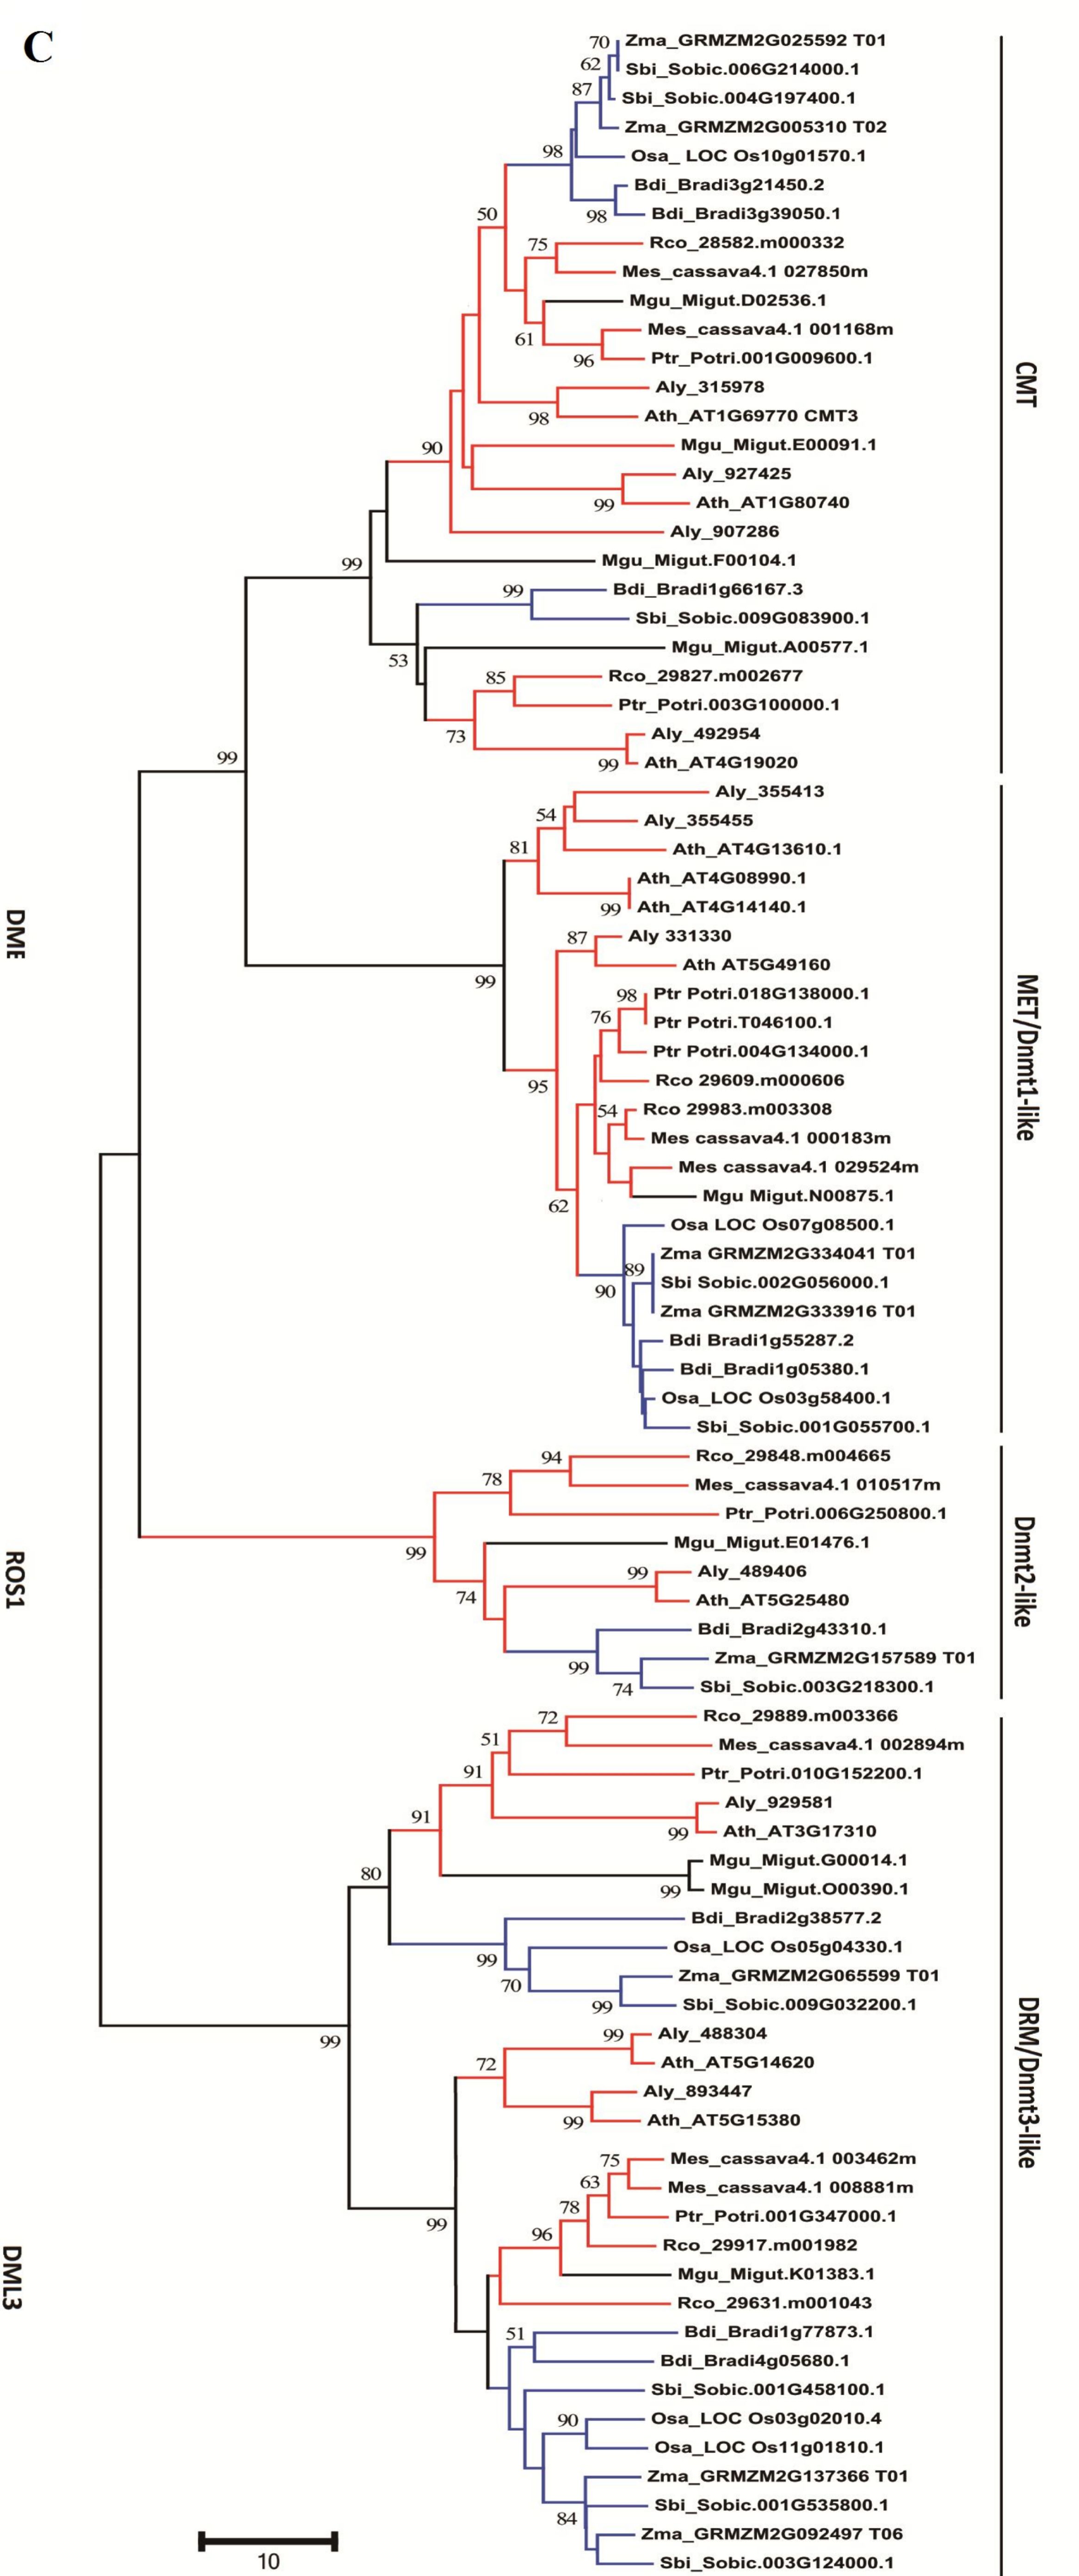

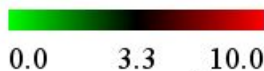

Embryo

Endosperm

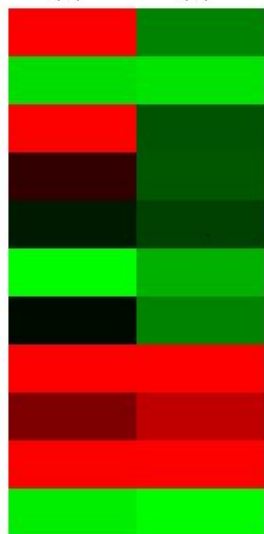

29983.m003308\_MET1-1  
29609.m000606\_MET1-2  
28582.m000332\_CMT1  
29827.m002677\_CMT2  
29848.m004665\_Dnmt2  
29631.m001043\_DRM1  
29889.m003366\_DRM2  
29917.m001982\_DRM3  
29428.m000327\_DME  
29092.m000452\_ROS1  
29991.m000647\_DML3

**(a)**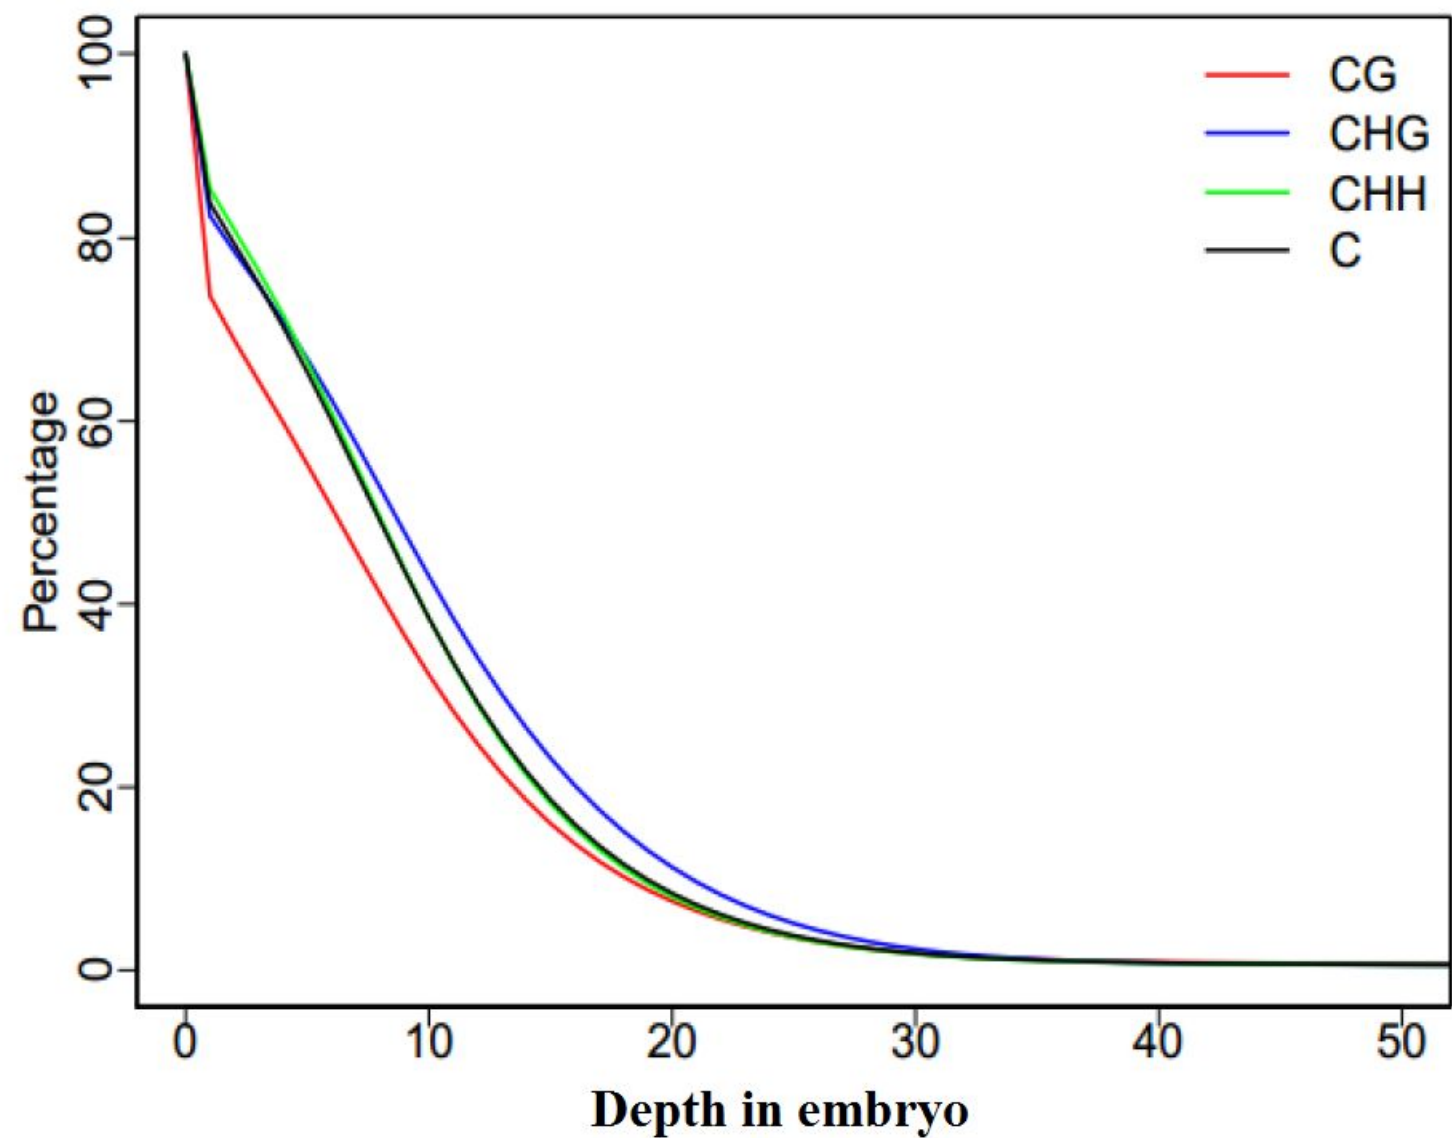**(b)**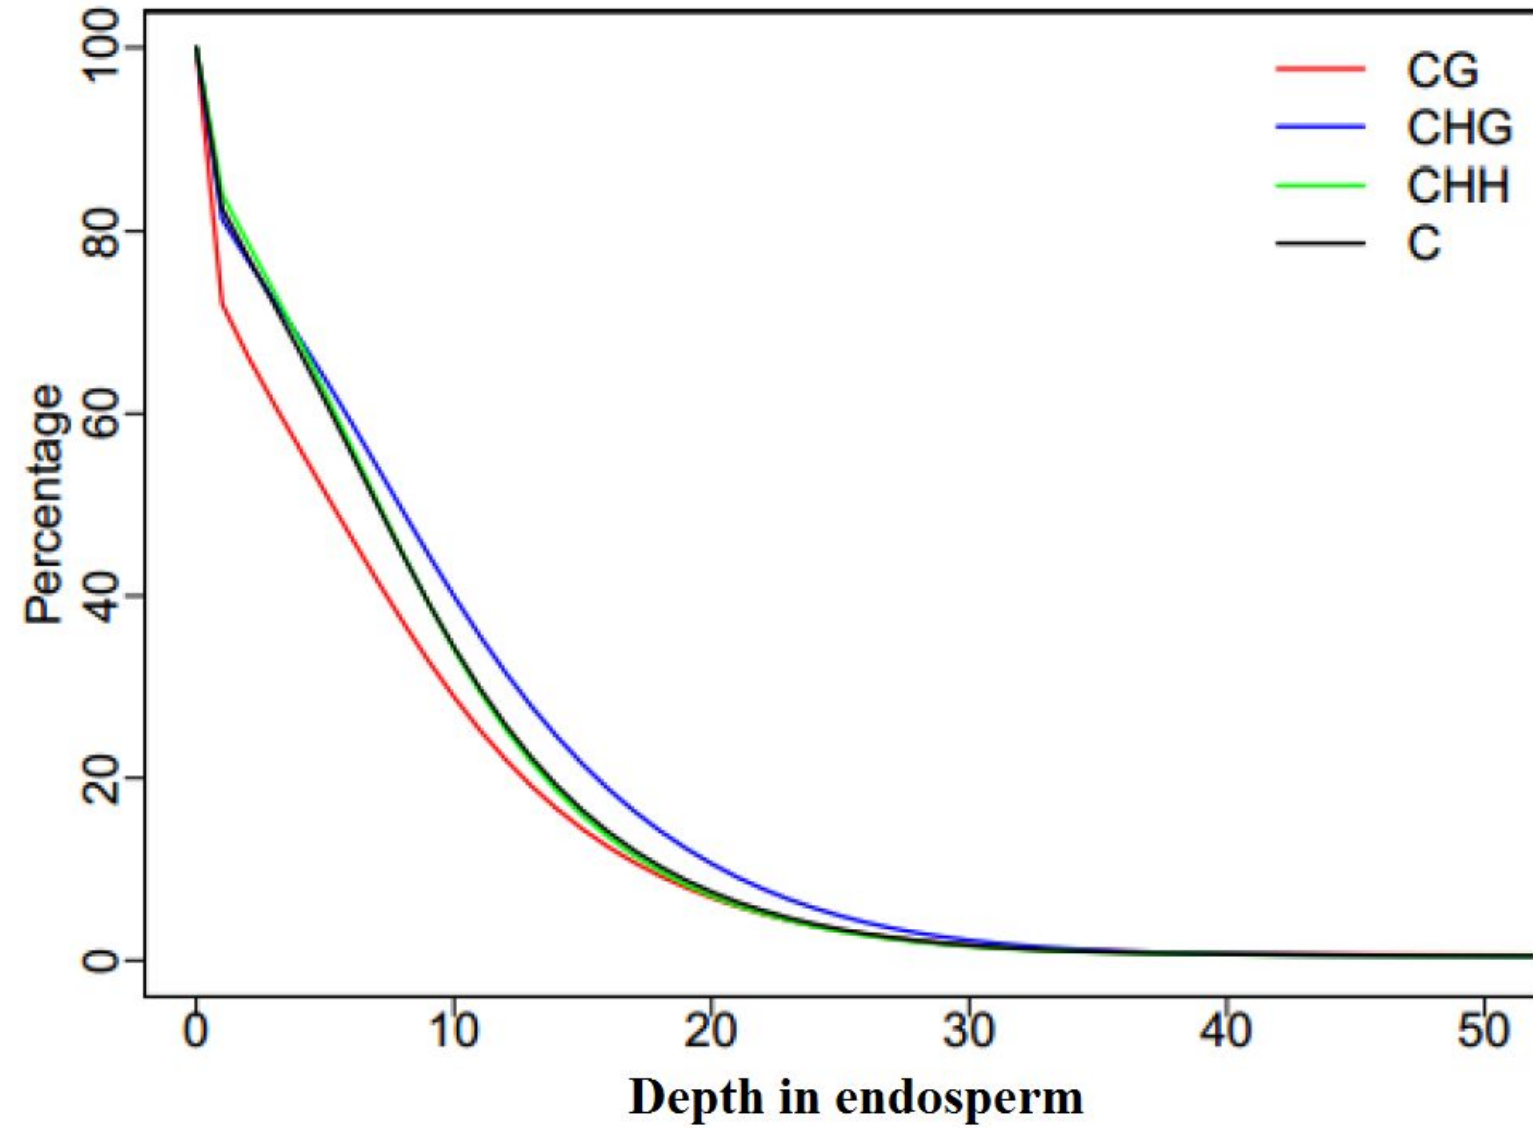



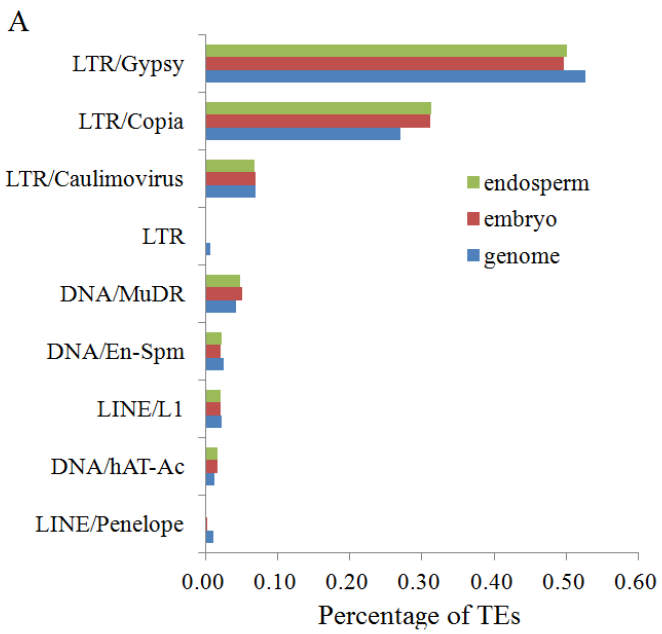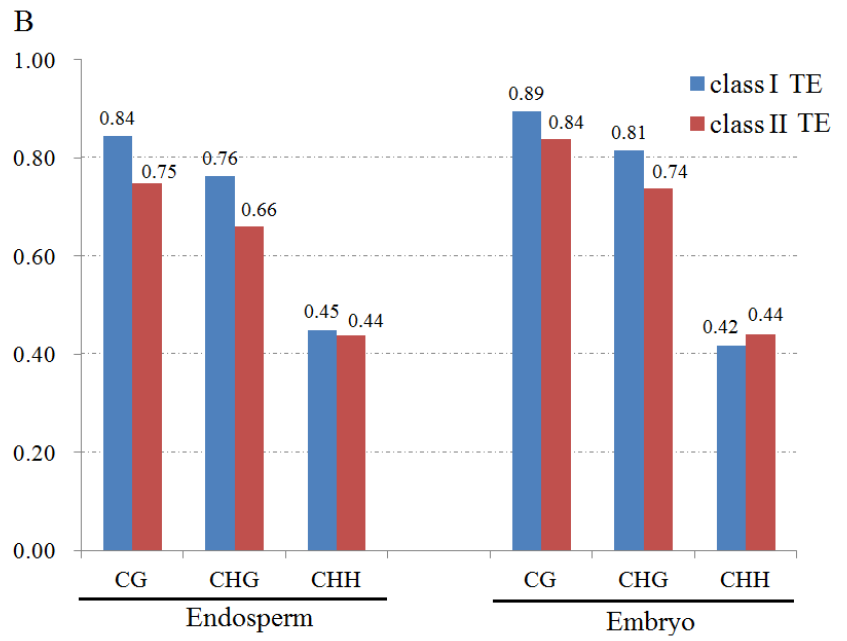

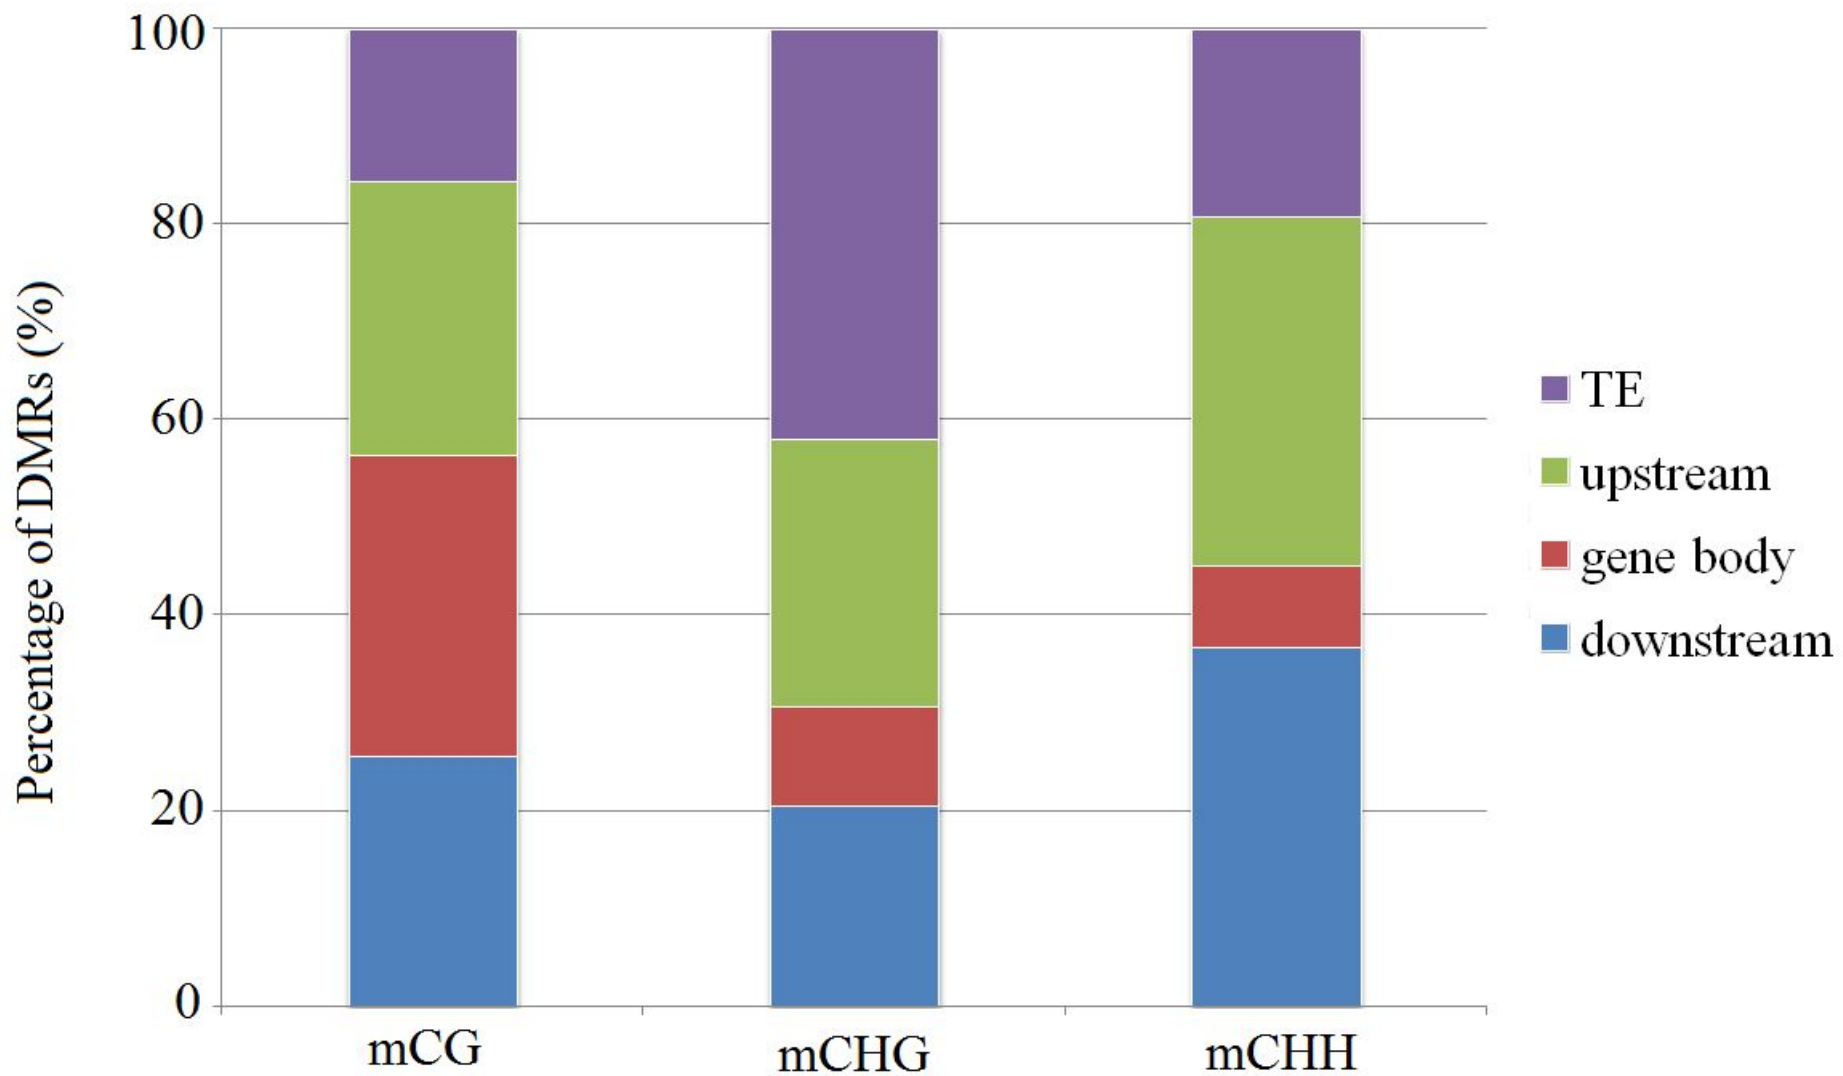

CG methylation level

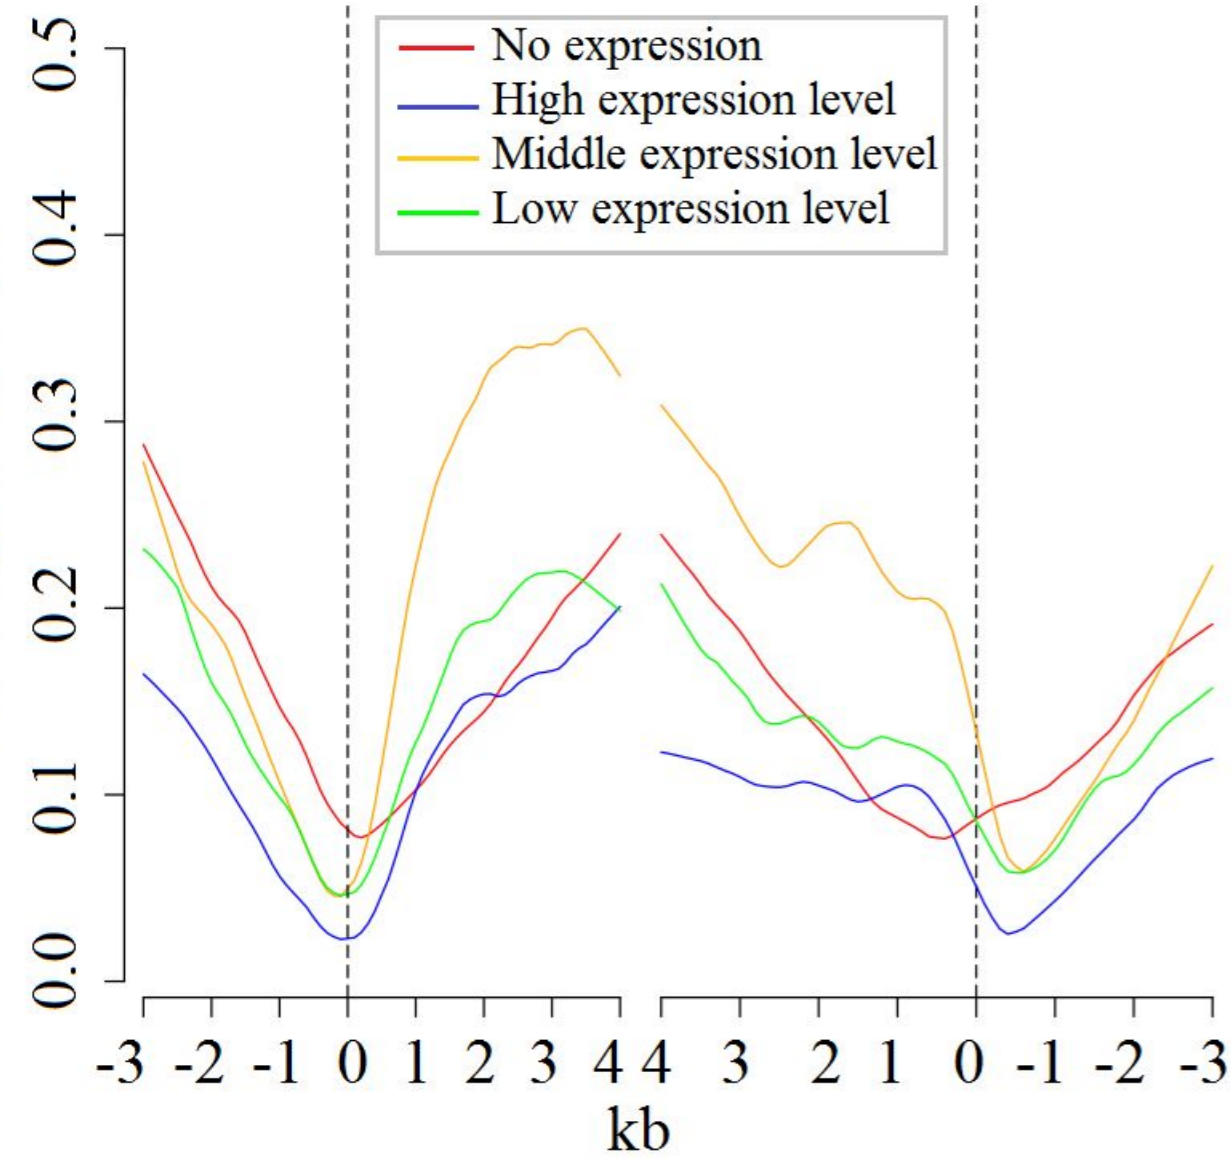

CHG methylation level

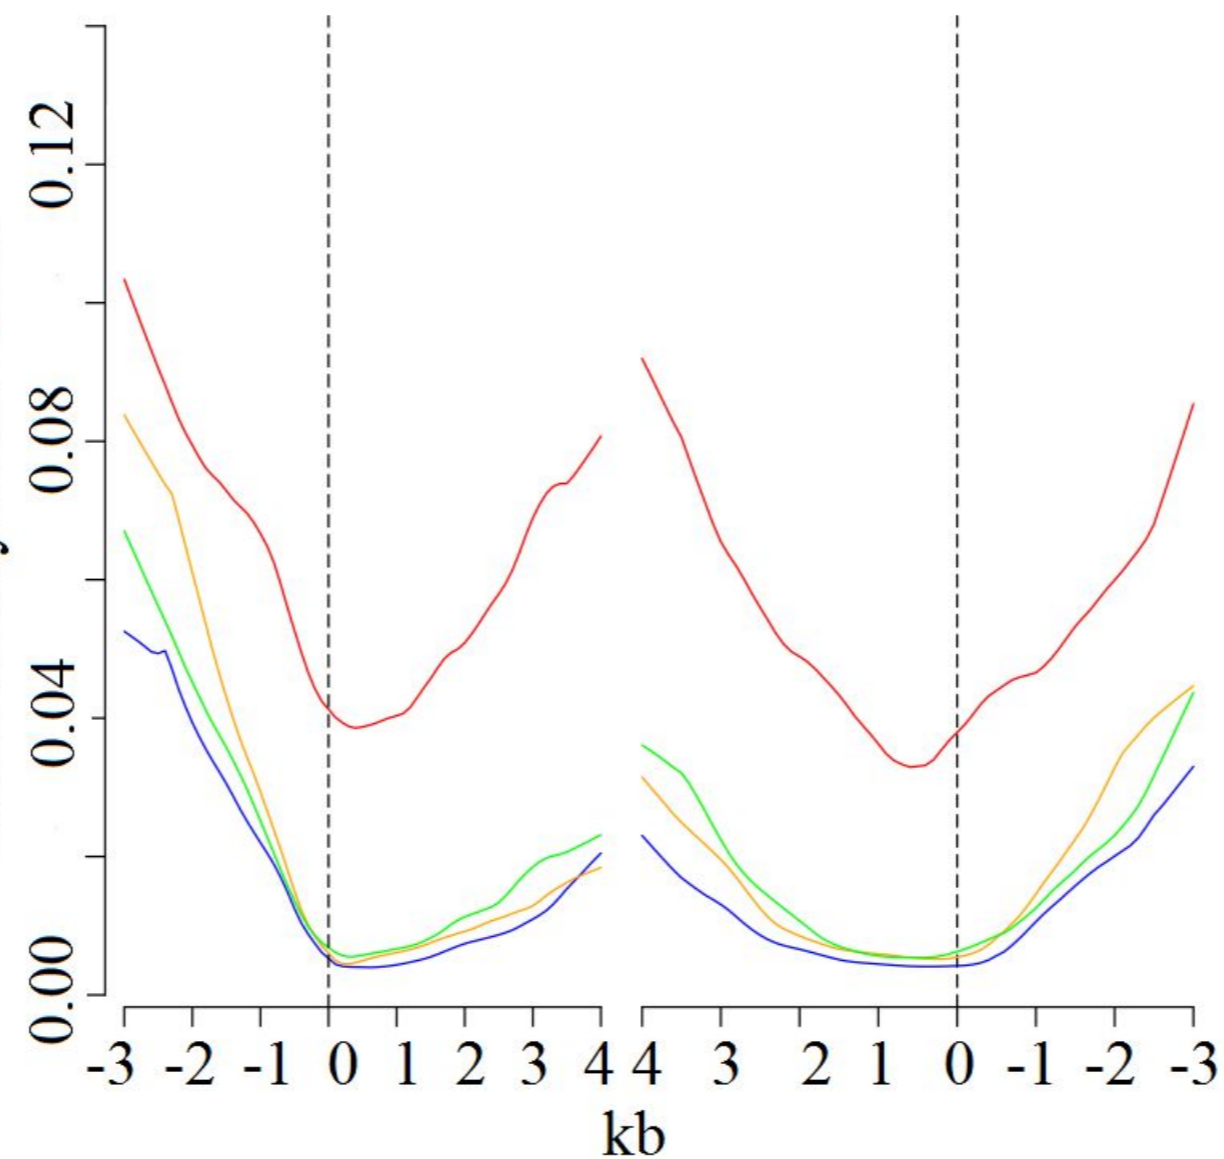

CHH methylation level

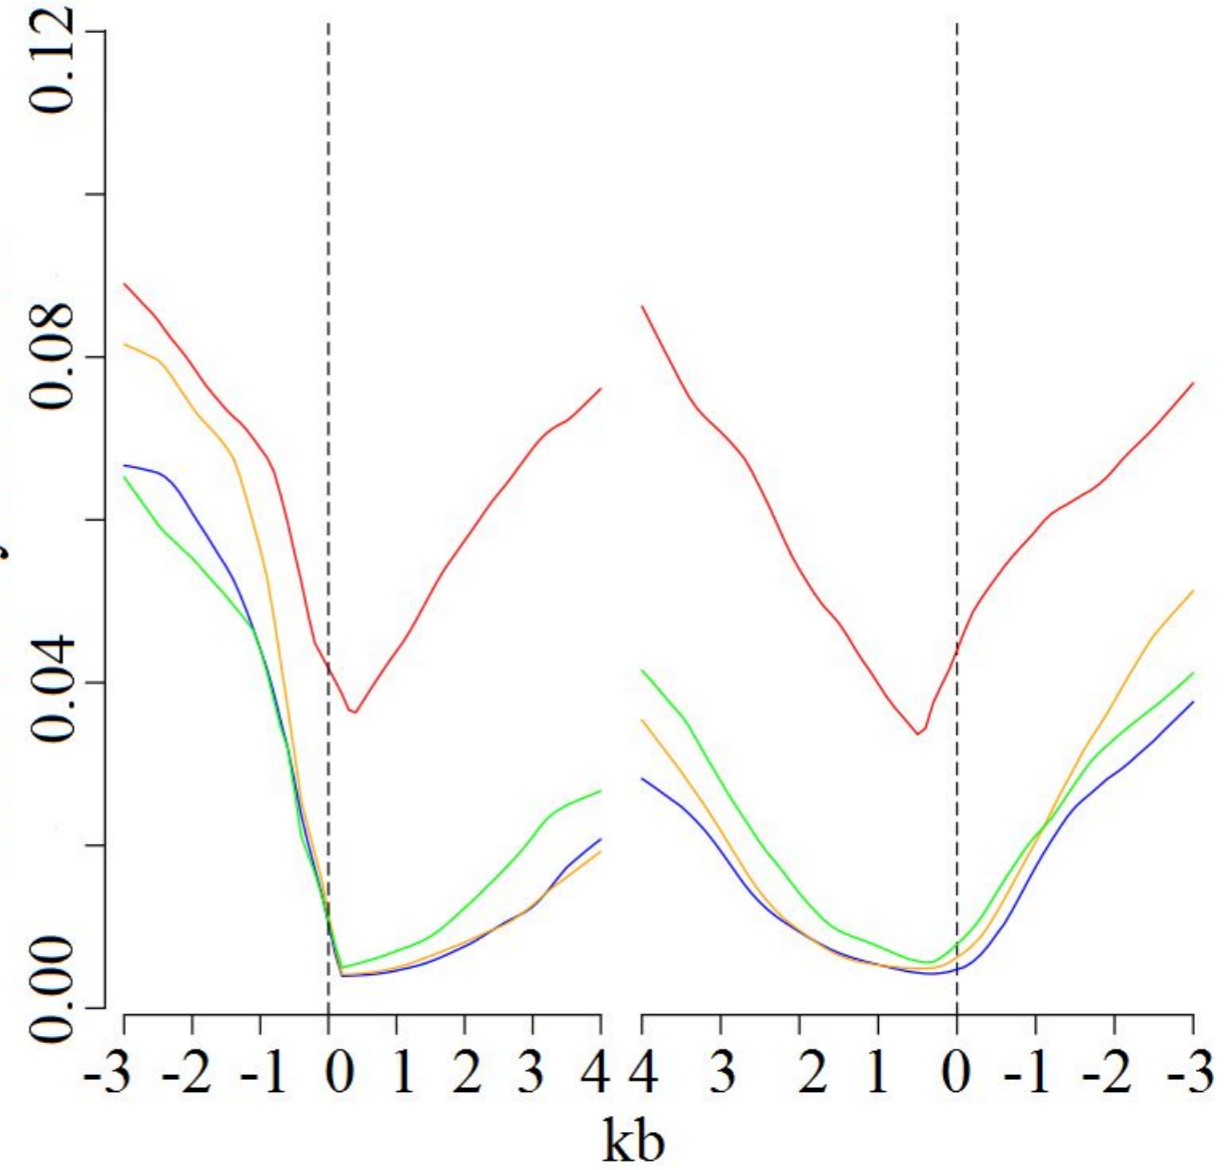

# WEGO output

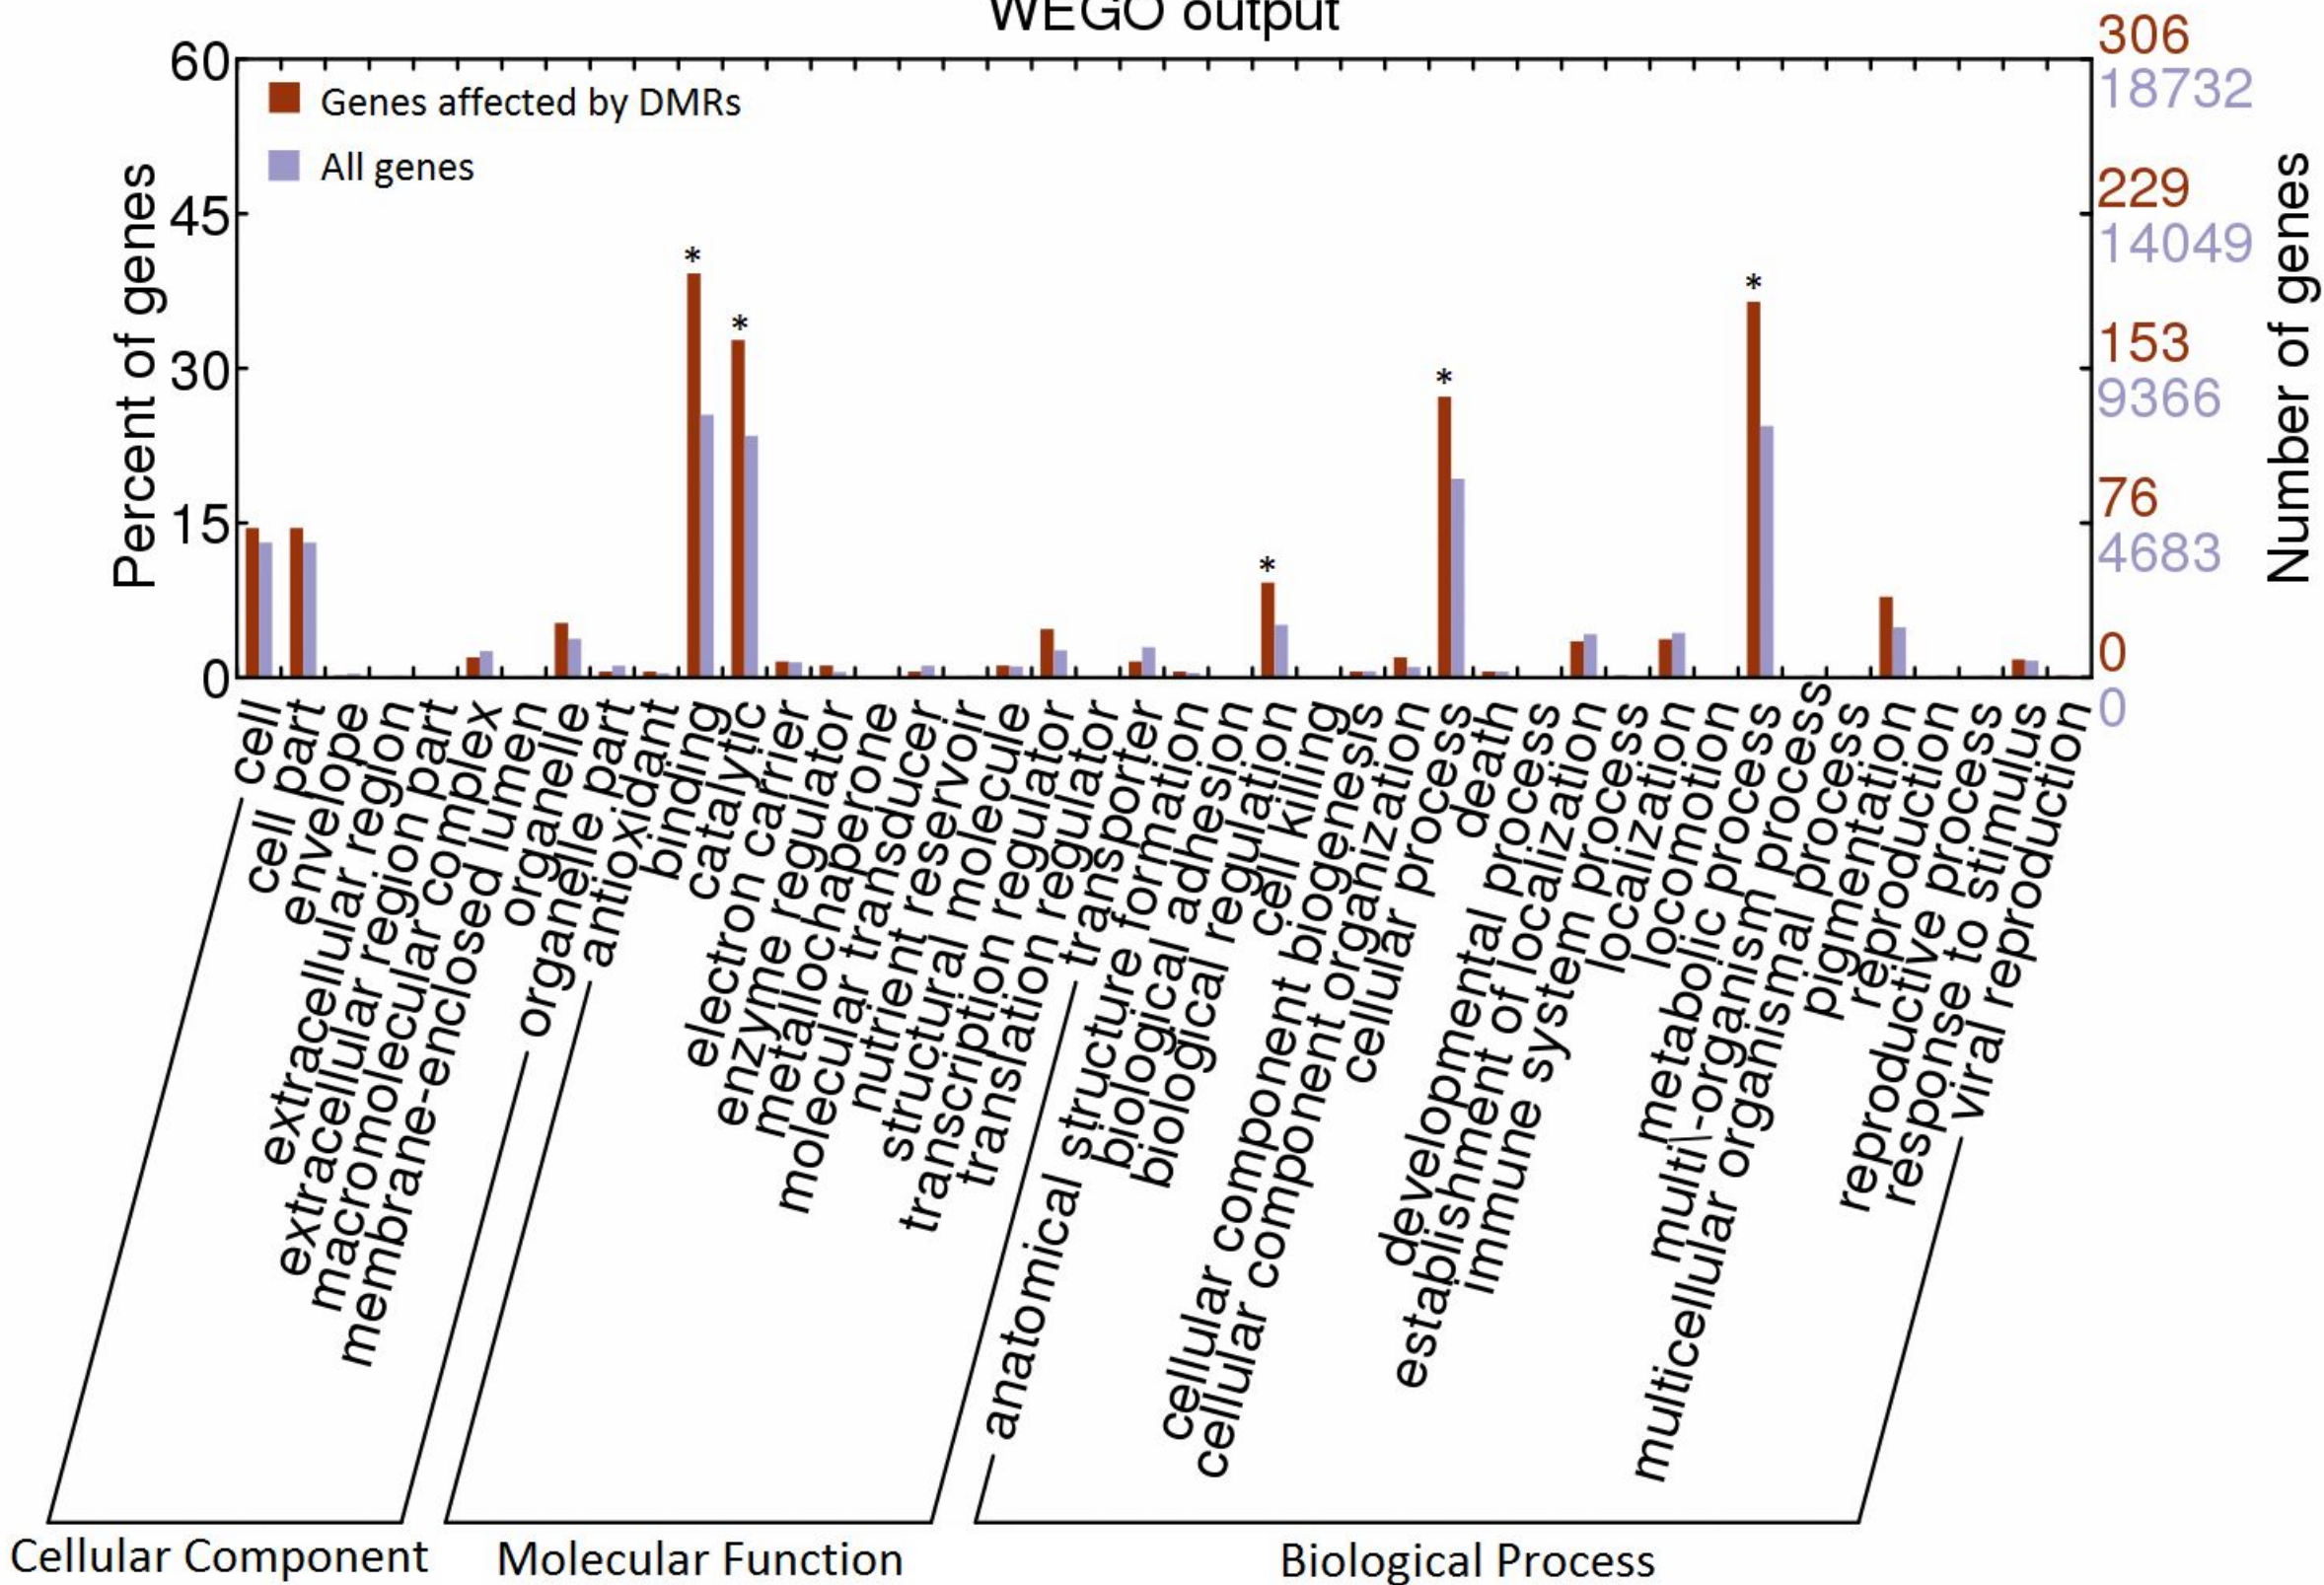

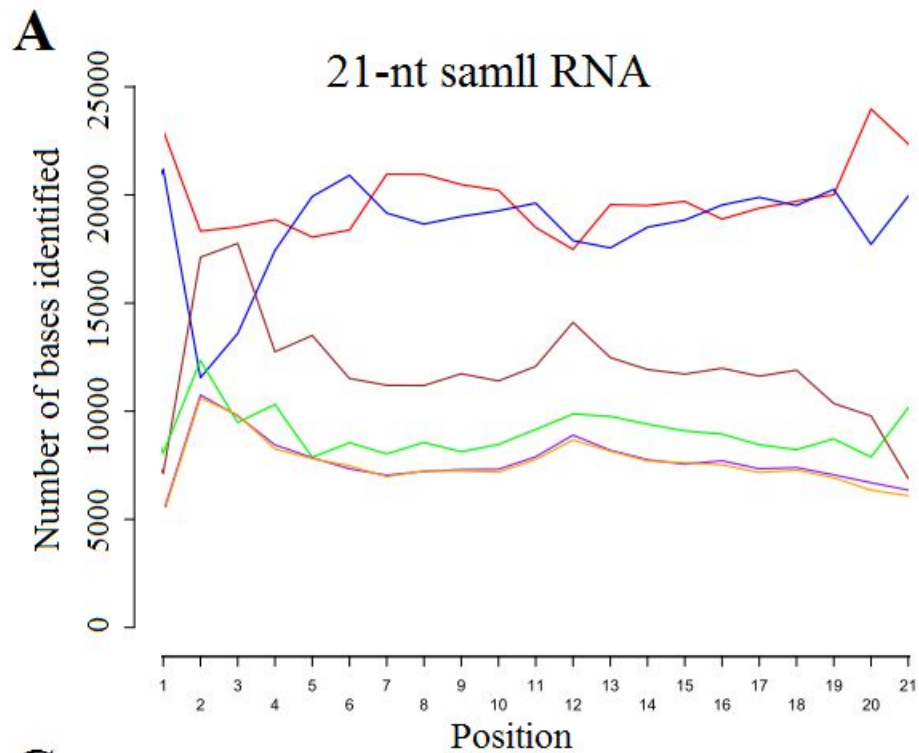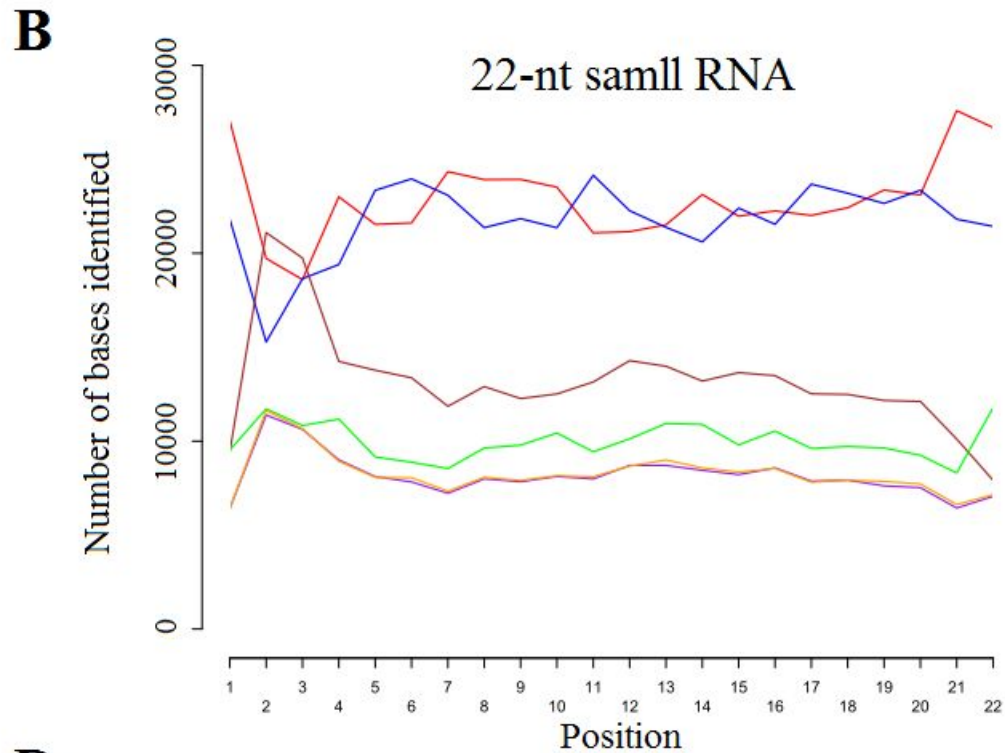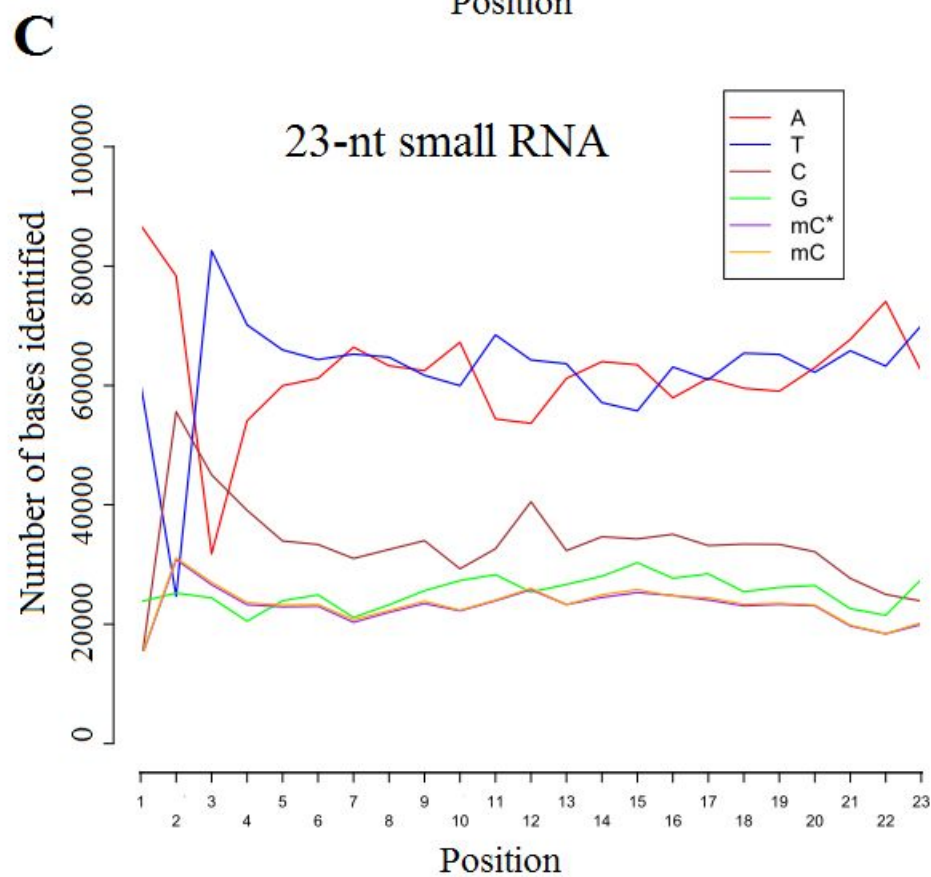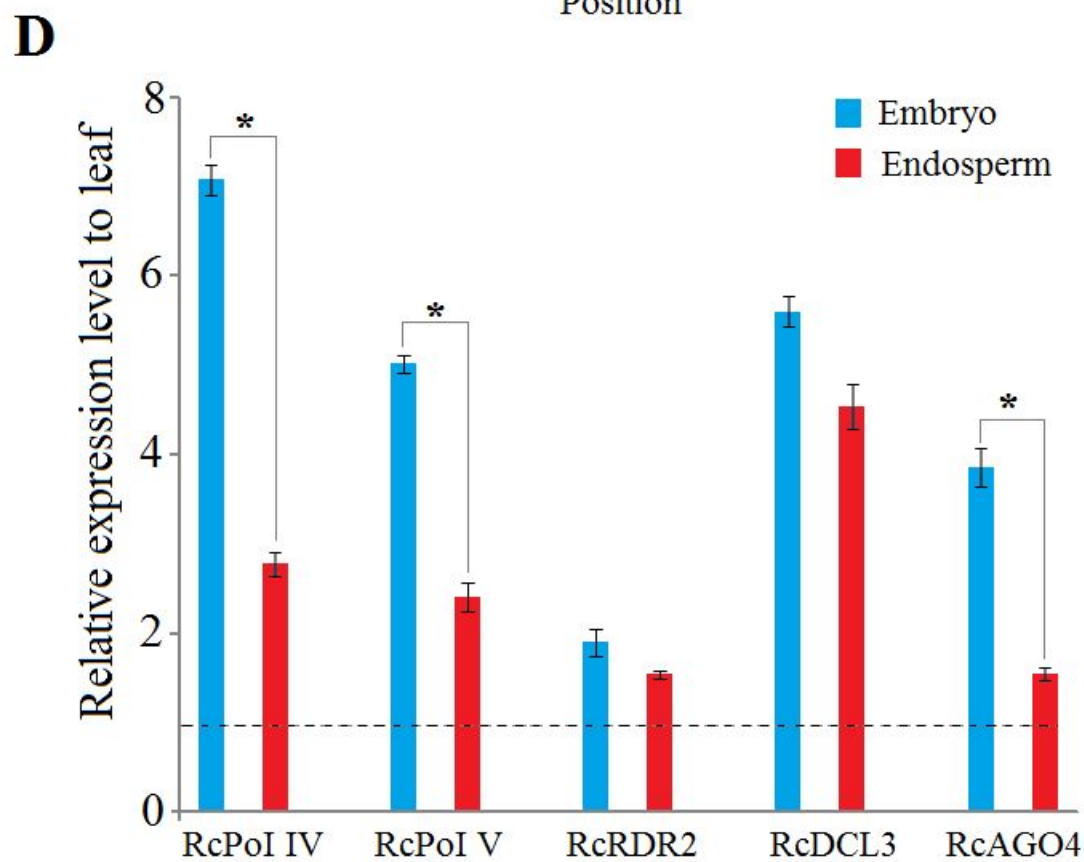

1 **Supplemental Table S1.** Information on bisulfite sequencing data.

| Tissues   | Total reads | Total nucleotides | Q20 percentage | Mapped ratio | Coverage |
|-----------|-------------|-------------------|----------------|--------------|----------|
| embryo    | 119,977,144 | 10,736,663,895    | 99.43%         | 88.00%       | 30.8     |
| endosperm | 120,916,496 | 10,882,484,640    | 99.41%         | 88.00%       | 31       |

2

3

4

1 **Supplemental Table S2.** The percentages of CG, CHG and CHH in genomes of  
2 *Arabidopsis* (*At*), rice (*Os*), maize (*Zm*) and castor bean (*Rc*).

| Species | Genome size (Mbp) | C count     | CG(%) | CHG(%) | CHH(%) |
|---------|-------------------|-------------|-------|--------|--------|
| Rc      | 230               | 114,034,816 | 10.9  | 14.0   | 75.1   |
| At      | 120               | 42,859,753  | 13.0  | 14.2   | 72.8   |
| Os      | 420               | 163,079,918 | 19.0  | 16.8   | 64.2   |
| Zm      | 2,045             | 959,794,792 | 18.7  | 16.4   | 64.9   |

3  
4  
5  
6  
7  
8

**Supplemental Table S3** Substantial differentially methylated regions in

| Scaffold | Start  | end    | P-value  | DNA methylation level in embryo |
|----------|--------|--------|----------|---------------------------------|
| 27373    | 92394  | 92690  | 6.59E-17 | 0.92                            |
| 27373    | 97175  | 97707  | 1.63E-48 | 0.96                            |
| 27375    | 13633  | 13876  | 1.03E-04 | 0.8                             |
| 27375    | 55132  | 55334  | 8.11E-05 | 0.83                            |
| 27375    | 58434  | 58766  | 1.87E-05 | 0.84                            |
| 27375    | 72192  | 72469  | 7.50E-08 | 0.83                            |
| 27375    | 72231  | 72502  | 1.98E-08 | 0.83                            |
| 27383    | 4323   | 5312   | 3.35E-16 | 0.76                            |
| 27383    | 14245  | 14777  | 2.63E-63 | 0.75                            |
| 27383    | 21664  | 22238  | 1.31E-40 | 0.84                            |
| 27383    | 42895  | 43304  | 3.84E-23 | 0.79                            |
| 27383    | 43868  | 44484  | 4.85E-39 | 0.9                             |
| 27383    | 46548  | 47266  | 1.97E-20 | 0.76                            |
| 27383    | 49978  | 50727  | 6.60E-32 | 0.77                            |
| 27388    | 1287   | 2080   | 2.96E-29 | 0.66                            |
| 27389    | 12969  | 13393  | 6.67E-17 | 0.76                            |
| 27389    | 14992  | 16036  | 1.78E-52 | 0.88                            |
| 27389    | 23591  | 24243  | 4.05E-18 | 0.83                            |
| 27394    | 18139  | 19338  | 1.61E-68 | 0.87                            |
| 27394    | 22998  | 23410  | 5.27E-28 | 0.84                            |
| 27394    | 24651  | 25291  | 2.06E-21 | 0.66                            |
| 27394    | 34616  | 34825  | 2.82E-09 | 0.67                            |
| 27394    | 41041  | 41779  | 4.36E-47 | 0.83                            |
| 27394    | 42539  | 43297  | 1.21E-77 | 0.88                            |
| 27394    | 43520  | 43863  | 6.48E-12 | 0.73                            |
| 27394    | 44074  | 44489  | 2.19E-08 | 0.97                            |
| 27394    | 44732  | 45470  | 5.07E-19 | 0.75                            |
| 27394    | 55890  | 56622  | 4.97E-44 | 0.65                            |
| 27394    | 104587 | 104965 | 1.71E-19 | 0.85                            |
| 27394    | 108243 | 109177 | 9.36E-43 | 0.84                            |
| 27394    | 125345 | 125615 | 4.01E-29 | 0.93                            |
| 27394    | 126360 | 127367 | 5.84E-61 | 0.9                             |
| 27394    | 128473 | 129233 | 3.45E-32 | 0.84                            |
| 27394    | 129589 | 129986 | 2.20E-19 | 0.89                            |
| 27394    | 143895 | 144247 | 4.26E-30 | 0.83                            |
| 27394    | 164833 | 165146 | 7.96E-24 | 0.84                            |
| 27395    | 6048   | 6487   | 3.67E-61 | 0.87                            |
| 27395    | 9041   | 9408   | 1.40E-23 | 0.85                            |
| 27395    | 9773   | 10557  | 2.24E-20 | 0.77                            |
| 27395    | 10769  | 11380  | 6.26E-13 | 0.77                            |
| 27395    | 25806  | 27801  | 3.46E-53 | 0.78                            |
| 27395    | 29582  | 29902  | 5.38E-09 | 0.77                            |
| 27400    | 11281  | 11747  | 1.34E-03 | 0.93                            |
| 27401    | 8872   | 9318   | 3.64E-20 | 0.8                             |
| 27401    | 11653  | 11948  | 7.65E-09 | 0.8                             |
| 27401    | 16234  | 16819  | 4.05E-46 | 0.85                            |
| 27401    | 17143  | 18030  | 8.96E-41 | 0.86                            |
| 27401    | 18497  | 18747  | 4.73E-13 | 0.82                            |
| 27401    | 79769  | 80276  | 9.28E-31 | 0.93                            |
| 27401    | 92315  | 93696  | 1.94E-47 | 0.65                            |



|       |        |        |           |      |
|-------|--------|--------|-----------|------|
| 27401 | 94015  | 94627  | 1.61E-62  | 0.88 |
| 27401 | 106016 | 107427 | 1.75E-232 | 0.91 |
| 27401 | 107645 | 108506 | 4.14E-95  | 0.94 |
| 27404 | 14402  | 14825  | 4.11E-27  | 0.96 |
| 27404 | 34697  | 35070  | 7.47E-15  | 0.83 |
| 27404 | 34852  | 35083  | 8.96E-15  | 0.81 |
| 27415 | 28054  | 28765  | 3.81E-05  | 0.76 |
| 27416 | 1062   | 1677   | 2.26E-05  | 0.85 |
| 27417 | 10339  | 11031  | 1.74E-13  | 0.86 |
| 27417 | 12030  | 12381  | 2.02E-12  | 0.91 |
| 27421 | 12749  | 13295  | 9.65E-09  | 0.9  |
| 27428 | 113    | 554    | 2.07E-21  | 0.92 |
| 27428 | 2778   | 3182   | 1.78E-15  | 0.78 |
| 27428 | 11224  | 11668  | 1.92E-30  | 0.93 |
| 27428 | 16235  | 17487  | 1.40E-82  | 0.87 |
| 27428 | 22225  | 22903  | 2.35E-50  | 0.69 |
| 27428 | 23115  | 24246  | 3.92E-52  | 0.76 |
| 27428 | 48412  | 48843  | 8.16E-43  | 0.93 |
| 27436 | 35110  | 35516  | 1.30E-44  | 0.78 |
| 27436 | 35840  | 37115  | 4.26E-38  | 0.8  |
| 27436 | 47414  | 47618  | 1.26E-17  | 0.72 |
| 27436 | 81649  | 82115  | 1.07E-15  | 0.84 |
| 27436 | 85919  | 86431  | 3.84E-28  | 0.6  |
| 27436 | 87296  | 88181  | 1.50E-45  | 0.83 |
| 27436 | 88459  | 88809  | 3.66E-18  | 0.78 |
| 27436 | 101445 | 101984 | 1.07E-78  | 0.82 |
| 27436 | 106699 | 107485 | 1.05E-19  | 0.81 |
| 27436 | 153803 | 154397 | 2.32E-56  | 0.95 |
| 27436 | 154813 | 155467 | 2.07E-56  | 0.94 |
| 27436 | 156178 | 156835 | 6.83E-22  | 0.92 |
| 27436 | 167107 | 167556 | 1.66E-17  | 0.76 |
| 27436 | 185424 | 185630 | 6.79E-22  | 0.81 |
| 27436 | 189096 | 189399 | 6.54E-15  | 0.9  |
| 27436 | 199406 | 199657 | 3.39E-21  | 0.8  |
| 27436 | 199938 | 201012 | 1.71E-77  | 0.93 |
| 27436 | 201217 | 201601 | 7.15E-28  | 0.8  |
| 27446 | 34593  | 35614  | 2.92E-78  | 0.82 |
| 27446 | 38452  | 38781  | 3.43E-05  | 0.72 |
| 27446 | 62003  | 62419  | 5.78E-14  | 0.83 |
| 27446 | 63499  | 64352  | 2.17E-28  | 0.92 |
| 27446 | 66191  | 66440  | 2.80E-08  | 0.64 |
| 27446 | 71137  | 71638  | 4.84E-19  | 0.89 |
| 27446 | 72344  | 73272  | 3.38E-18  | 0.71 |
| 27446 | 103675 | 104027 | 1.02E-41  | 0.95 |
| 27446 | 106832 | 107650 | 2.36E-19  | 0.64 |
| 27446 | 112917 | 113618 | 4.26E-27  | 0.79 |
| 27446 | 115614 | 116314 | 2.32E-30  | 0.82 |
| 27446 | 117895 | 118738 | 9.86E-40  | 0.91 |
| 27446 | 125966 | 126196 | 9.61E-16  | 0.78 |
| 27446 | 126445 | 126896 | 3.47E-08  | 0.76 |
| 27446 | 127255 | 127556 | 3.39E-14  | 0.7  |
| 27446 | 148856 | 149092 | 6.18E-14  | 0.74 |
| 27446 | 166586 | 167327 | 4.38E-27  | 0.66 |

|       |        |        |           |      |
|-------|--------|--------|-----------|------|
| 27446 | 175729 | 176415 | 6.37E-06  | 0.67 |
| 27447 | 163    | 747    | 1.18E-10  | 0.76 |
| 27448 | 247    | 2245   | 2.43E-103 | 0.92 |
| 27448 | 7603   | 7945   | 2.36E-19  | 0.88 |
| 27448 | 8412   | 8926   | 4.07E-38  | 0.98 |
| 27448 | 25595  | 26420  | 1.64E-58  | 0.78 |
| 27448 | 27878  | 29087  | 1.42E-53  | 0.81 |
| 27448 | 29618  | 30071  | 1.59E-22  | 0.6  |
| 27449 | 5176   | 5603   | 9.48E-05  | 0.85 |
| 27449 | 21403  | 21886  | 2.56E-23  | 0.86 |
| 27449 | 23531  | 23975  | 1.78E-06  | 0.97 |
| 27451 | 16680  | 17757  | 6.08E-34  | 0.71 |
| 27451 | 18016  | 18496  | 1.71E-35  | 0.7  |
| 27451 | 31056  | 31613  | 1.38E-19  | 0.84 |
| 27451 | 41530  | 41814  | 4.55E-37  | 0.92 |
| 27451 | 43796  | 44436  | 2.27E-47  | 0.94 |
| 27451 | 45032  | 46511  | 1.30E-71  | 0.96 |
| 27451 | 46873  | 47240  | 6.50E-20  | 0.8  |
| 27451 | 48173  | 48711  | 5.11E-10  | 0.72 |
| 27451 | 50921  | 51141  | 1.01E-20  | 0.65 |
| 27451 | 73737  | 74134  | 1.87E-08  | 0.7  |
| 27451 | 119963 | 120477 | 1.22E-17  | 0.83 |
| 27451 | 127167 | 127638 | 4.94E-46  | 0.93 |
| 27451 | 128744 | 128948 | 8.37E-18  | 0.9  |
| 27451 | 131002 | 131964 | 6.34E-55  | 0.92 |
| 27451 | 133314 | 134174 | 1.14E-29  | 0.84 |
| 27451 | 136244 | 136592 | 1.70E-21  | 0.92 |
| 27451 | 137586 | 138432 | 1.95E-25  | 0.88 |
| 27451 | 138712 | 138919 | 1.78E-18  | 0.89 |
| 27451 | 144923 | 145941 | 6.94E-99  | 0.94 |
| 27451 | 146266 | 146776 | 2.00E-56  | 0.95 |
| 27451 | 150857 | 151506 | 1.23E-84  | 0.94 |
| 27461 | 16127  | 16593  | 2.98E-15  | 0.88 |
| 27461 | 17801  | 18174  | 1.51E-33  | 0.94 |
| 27461 | 21810  | 22191  | 1.22E-15  | 0.81 |
| 27461 | 23679  | 24029  | 1.44E-16  | 0.81 |
| 27461 | 30153  | 30501  | 7.31E-06  | 0.77 |
| 27467 | 7817   | 8647   | 4.52E-30  | 0.93 |
| 27467 | 11422  | 11683  | 1.32E-40  | 0.96 |
| 27467 | 12217  | 12561  | 2.50E-38  | 0.95 |
| 27467 | 15210  | 16245  | 5.27E-71  | 0.96 |
| 27467 | 16538  | 17048  | 5.22E-37  | 0.95 |
| 27467 | 32387  | 32602  | 3.93E-05  | 0.95 |
| 27467 | 44847  | 45442  | 6.06E-71  | 0.93 |
| 27467 | 46110  | 46958  | 8.71E-134 | 0.96 |
| 27467 | 54386  | 55844  | 1.42E-36  | 0.65 |
| 27467 | 93720  | 94138  | 2.86E-14  | 0.93 |
| 27467 | 109648 | 109848 | 6.53E-14  | 0.87 |
| 27467 | 122243 | 122909 | 2.84E-08  | 0.76 |
| 27467 | 138148 | 139157 | 2.70E-85  | 0.92 |
| 27467 | 139700 | 140336 | 1.70E-47  | 0.93 |
| 27467 | 141862 | 142735 | 1.03E-38  | 0.72 |
| 27467 | 144586 | 145282 | 1.06E-21  | 0.75 |

|       |        |        |           |      |
|-------|--------|--------|-----------|------|
| 27467 | 147922 | 148881 | 6.25E-58  | 0.94 |
| 27469 | 16815  | 17180  | 1.78E-10  | 0.9  |
| 27469 | 36630  | 37143  | 1.70E-38  | 0.91 |
| 27469 | 37850  | 38106  | 3.88E-17  | 0.77 |
| 27471 | 1882   | 2443   | 1.05E-24  | 0.88 |
| 27471 | 14163  | 14513  | 3.60E-34  | 0.88 |
| 27471 | 30094  | 30327  | 3.81E-11  | 0.95 |
| 27471 | 46383  | 47592  | 1.19E-22  | 0.8  |
| 27471 | 49259  | 49636  | 1.27E-24  | 0.92 |
| 27471 | 55967  | 57130  | 7.86E-43  | 0.7  |
| 27471 | 71864  | 72487  | 8.44E-17  | 0.76 |
| 27471 | 89067  | 89278  | 1.98E-11  | 0.75 |
| 27471 | 92205  | 92654  | 5.91E-23  | 0.83 |
| 27471 | 94273  | 94484  | 4.83E-42  | 0.91 |
| 27471 | 100907 | 102082 | 4.05E-54  | 0.84 |
| 27471 | 122257 | 122459 | 7.98E-11  | 0.93 |
| 27471 | 153597 | 154386 | 7.42E-37  | 0.83 |
| 27471 | 166099 | 166326 | 3.90E-25  | 0.83 |
| 27482 | 33952  | 35220  | 3.54E-85  | 0.87 |
| 27488 | 2461   | 4383   | 1.26E-102 | 0.89 |
| 27488 | 31168  | 31878  | 1.73E-06  | 0.85 |
| 27492 | 1931   | 2499   | 3.00E-17  | 0.89 |
| 27496 | 10782  | 11467  | 1.25E-25  | 0.85 |
| 27496 | 11730  | 12114  | 1.27E-33  | 0.86 |
| 27496 | 17282  | 18137  | 6.48E-54  | 0.88 |
| 27496 | 19266  | 19890  | 5.69E-20  | 0.81 |
| 27496 | 20239  | 20707  | 2.66E-37  | 0.92 |
| 27496 | 40227  | 40594  | 1.36E-13  | 0.92 |
| 27504 | 69154  | 69500  | 3.87E-10  | 0.67 |
| 27504 | 69899  | 70883  | 1.36E-43  | 0.83 |
| 27504 | 94253  | 94822  | 1.70E-72  | 0.93 |
| 27504 | 110334 | 110942 | 2.89E-32  | 0.72 |
| 27504 | 111174 | 111711 | 3.28E-29  | 0.66 |
| 27504 | 140763 | 142060 | 1.50E-64  | 0.77 |
| 27504 | 156926 | 157907 | 1.45E-35  | 0.73 |
| 27504 | 158188 | 158686 | 3.37E-22  | 0.85 |
| 27504 | 159549 | 159923 | 1.28E-13  | 0.67 |
| 27504 | 160384 | 160606 | 2.51E-16  | 0.86 |
| 27504 | 172703 | 173572 | 1.29E-49  | 0.77 |
| 27504 | 256333 | 256649 | 2.50E-38  | 0.96 |
| 27504 | 256939 | 257293 | 1.75E-24  | 0.82 |
| 27504 | 265703 | 266333 | 5.45E-27  | 0.78 |
| 27506 | 13691  | 14089  | 8.47E-45  | 0.93 |
| 27506 | 14304  | 14626  | 7.87E-53  | 0.94 |
| 27506 | 37646  | 38007  | 9.41E-14  | 0.78 |
| 27506 | 39353  | 39779  | 1.71E-61  | 0.94 |
| 27516 | 75     | 542    | 1.50E-12  | 0.75 |
| 27516 | 4117   | 4485   | 4.04E-14  | 0.85 |
| 27516 | 6235   | 6793   | 6.55E-30  | 0.94 |
| 27516 | 17034  | 17538  | 3.83E-19  | 0.87 |
| 27516 | 28044  | 28551  | 3.12E-14  | 0.82 |
| 27516 | 29281  | 30160  | 6.80E-29  | 0.89 |
| 27516 | 38574  | 38890  | 1.53E-30  | 0.77 |

|       |        |        |           |      |
|-------|--------|--------|-----------|------|
| 27516 | 42355  | 43220  | 9.42E-38  | 0.89 |
| 27516 | 46911  | 47406  | 9.05E-42  | 0.89 |
| 27516 | 49383  | 49659  | 3.01E-10  | 0.84 |
| 27516 | 55237  | 55455  | 1.27E-09  | 0.65 |
| 27516 | 55762  | 56724  | 2.03E-79  | 0.92 |
| 27516 | 74029  | 74304  | 7.78E-19  | 0.79 |
| 27516 | 76090  | 77103  | 4.00E-31  | 0.67 |
| 27519 | 35859  | 36177  | 1.88E-13  | 0.82 |
| 27519 | 75171  | 75468  | 1.74E-11  | 0.93 |
| 27519 | 75919  | 76195  | 8.12E-07  | 0.87 |
| 27519 | 138022 | 138439 | 9.77E-12  | 0.76 |
| 27519 | 161638 | 162167 | 1.11E-13  | 0.88 |
| 27519 | 168697 | 169083 | 4.55E-05  | 0.81 |
| 27524 | 23647  | 24007  | 3.10E-12  | 0.83 |
| 27524 | 122238 | 123133 | 1.12E-36  | 0.75 |
| 27526 | 24797  | 26215  | 1.98E-70  | 0.86 |
| 27526 | 36690  | 37447  | 6.48E-56  | 0.9  |
| 27526 | 37956  | 38620  | 4.68E-19  | 0.84 |
| 27526 | 40304  | 40619  | 4.45E-35  | 0.8  |
| 27526 | 40822  | 41265  | 8.05E-55  | 0.94 |
| 27526 | 53888  | 54525  | 4.19E-15  | 0.68 |
| 27529 | 10035  | 11172  | 2.96E-75  | 0.92 |
| 27529 | 12561  | 14163  | 2.04E-115 | 0.94 |
| 27529 | 15122  | 17014  | 4.22E-88  | 0.7  |
| 27529 | 20920  | 21470  | 3.70E-32  | 0.85 |
| 27529 | 24502  | 25413  | 2.62E-48  | 0.64 |
| 27529 | 25665  | 26111  | 5.74E-25  | 0.79 |
| 27533 | 56716  | 57474  | 2.13E-27  | 0.94 |
| 27533 | 57736  | 57971  | 4.79E-31  | 0.92 |
| 27537 | 2423   | 3229   | 3.04E-24  | 0.62 |
| 27537 | 14631  | 15977  | 6.14E-34  | 0.7  |
| 27538 | 25566  | 25957  | 1.05E-20  | 0.85 |
| 27538 | 90972  | 92224  | 8.23E-85  | 0.76 |
| 27538 | 102158 | 102973 | 4.40E-15  | 0.8  |
| 27538 | 103900 | 104509 | 4.57E-11  | 0.63 |
| 27538 | 110126 | 110873 | 7.32E-43  | 0.77 |
| 27538 | 119039 | 120035 | 1.08E-41  | 0.79 |
| 27538 | 120564 | 120816 | 1.95E-40  | 0.96 |
| 27538 | 141336 | 143160 | 3.39E-71  | 0.72 |
| 27538 | 154208 | 155310 | 1.94E-57  | 0.73 |
| 27538 | 156122 | 157700 | 2.25E-57  | 0.85 |
| 27538 | 160515 | 160730 | 1.88E-12  | 0.79 |
| 27538 | 161332 | 162834 | 4.64E-40  | 0.65 |
| 27538 | 179288 | 180958 | 1.84E-91  | 0.83 |
| 27538 | 184596 | 185023 | 5.86E-42  | 0.75 |
| 27543 | 35469  | 35860  | 3.15E-07  | 0.97 |
| 27543 | 41500  | 41788  | 7.93E-16  | 0.87 |
| 27543 | 68761  | 69212  | 4.95E-20  | 0.77 |
| 27543 | 78266  | 78755  | 3.04E-20  | 0.75 |
| 27543 | 101936 | 102682 | 7.91E-59  | 0.89 |
| 27543 | 102964 | 103178 | 1.06E-15  | 0.88 |
| 27543 | 103454 | 105017 | 1.52E-84  | 0.88 |
| 27543 | 106032 | 106518 | 2.93E-26  | 0.94 |

|       |        |        |           |      |
|-------|--------|--------|-----------|------|
| 27543 | 113571 | 113805 | 1.93E-12  | 0.87 |
| 27543 | 148536 | 149131 | 1.12E-13  | 0.81 |
| 27543 | 152231 | 152667 | 6.13E-14  | 0.83 |
| 27549 | 4232   | 4442   | 1.10E-06  | 0.75 |
| 27553 | 9938   | 10629  | 5.97E-40  | 0.72 |
| 27553 | 10848  | 11441  | 8.90E-31  | 0.78 |
| 27553 | 25098  | 25867  | 3.26E-22  | 0.82 |
| 27553 | 33417  | 34207  | 1.30E-13  | 0.67 |
| 27553 | 35121  | 35831  | 9.26E-25  | 0.75 |
| 27553 | 36466  | 36803  | 1.28E-20  | 0.82 |
| 27553 | 50759  | 50967  | 7.91E-10  | 0.82 |
| 27553 | 52539  | 53453  | 4.30E-30  | 0.9  |
| 27553 | 53672  | 55183  | 1.76E-97  | 0.88 |
| 27553 | 57582  | 58123  | 3.14E-40  | 0.84 |
| 27553 | 59926  | 60479  | 2.85E-44  | 0.96 |
| 27553 | 61220  | 61568  | 1.40E-30  | 0.92 |
| 27553 | 66162  | 66895  | 4.48E-51  | 0.88 |
| 27553 | 71295  | 71742  | 2.69E-55  | 0.95 |
| 27553 | 73450  | 73981  | 8.39E-19  | 0.65 |
| 27553 | 78766  | 80145  | 2.64E-162 | 0.88 |
| 27553 | 91603  | 91979  | 9.73E-19  | 0.86 |
| 27553 | 92213  | 92528  | 3.64E-47  | 0.91 |
| 27553 | 94249  | 94801  | 3.78E-21  | 0.89 |
| 27553 | 96682  | 96894  | 9.15E-30  | 0.95 |
| 27553 | 125206 | 125611 | 3.08E-28  | 0.83 |
| 27553 | 136214 | 136621 | 1.14E-22  | 0.81 |
| 27553 | 137294 | 137516 | 2.31E-10  | 0.8  |
| 27555 | 996    | 1491   | 2.05E-46  | 0.92 |
| 27561 | 6599   | 7215   | 6.93E-20  | 0.8  |
| 27561 | 16042  | 16318  | 9.60E-23  | 0.82 |
| 27561 | 49561  | 49932  | 2.83E-19  | 0.81 |
| 27561 | 67880  | 68583  | 6.96E-33  | 0.69 |
| 27561 | 68807  | 69365  | 2.02E-20  | 0.72 |
| 27561 | 73872  | 74346  | 2.64E-43  | 0.95 |
| 27561 | 76988  | 77273  | 6.44E-29  | 0.87 |
| 27565 | 4556   | 5066   | 8.13E-05  | 0.89 |
| 27568 | 10834  | 11081  | 1.13E-16  | 0.81 |
| 27568 | 20301  | 22062  | 3.91E-138 | 0.83 |
| 27568 | 34257  | 36749  | 1.85E-115 | 0.87 |
| 27568 | 50386  | 50705  | 6.31E-09  | 0.75 |
| 27568 | 58819  | 59106  | 4.53E-10  | 0.75 |
| 27568 | 68112  | 68616  | 3.94E-07  | 0.97 |
| 27568 | 76956  | 77633  | 3.08E-48  | 0.95 |
| 27568 | 101216 | 101526 | 2.50E-41  | 0.94 |
| 27569 | 79496  | 79761  | 1.36E-03  | 0.78 |
| 27569 | 86695  | 87051  | 1.67E-05  | 0.89 |
| 27574 | 93     | 926    | 3.24E-31  | 0.6  |
| 27574 | 9670   | 10869  | 1.96E-48  | 0.75 |
| 27574 | 12840  | 13858  | 6.64E-58  | 0.87 |
| 27574 | 21653  | 22128  | 9.01E-83  | 0.89 |
| 27574 | 33895  | 34185  | 3.49E-29  | 0.93 |
| 27574 | 52529  | 53059  | 2.53E-16  | 0.79 |
| 27574 | 76580  | 76995  | 1.22E-14  | 0.64 |

|       |        |        |          |      |
|-------|--------|--------|----------|------|
| 27574 | 88611  | 89612  | 6.97E-55 | 0.83 |
| 27574 | 90814  | 93083  | 3.12E-48 | 0.77 |
| 27574 | 93380  | 93929  | 6.05E-18 | 0.8  |
| 27574 | 97704  | 98086  | 2.85E-26 | 0.88 |
| 27574 | 99460  | 100089 | 8.15E-35 | 0.87 |
| 27574 | 101414 | 101792 | 7.24E-18 | 0.85 |
| 27574 | 107902 | 108294 | 2.27E-16 | 0.82 |
| 27574 | 131125 | 132198 | 7.96E-44 | 0.78 |
| 27574 | 152114 | 152593 | 1.04E-10 | 0.74 |
| 27578 | 12388  | 12941  | 3.34E-13 | 0.82 |
| 27578 | 16160  | 16396  | 9.14E-04 | 0.76 |
| 27578 | 43781  | 45276  | 5.10E-44 | 0.82 |
| 27578 | 45482  | 47916  | 5.53E-55 | 0.71 |
| 27578 | 52163  | 52724  | 3.51E-13 | 0.94 |
| 27578 | 57606  | 58141  | 6.13E-05 | 1    |
| 27578 | 61713  | 62296  | 9.60E-09 | 0.91 |
| 27585 | 9364   | 9917   | 1.51E-19 | 0.67 |
| 27585 | 29378  | 29766  | 2.21E-10 | 0.81 |
| 27585 | 43422  | 44223  | 8.47E-31 | 0.82 |
| 27585 | 60825  | 61390  | 5.90E-41 | 0.9  |
| 27585 | 67084  | 67582  | 8.79E-23 | 0.69 |
| 27587 | 505    | 757    | 2.15E-05 | 1    |
| 27597 | 22504  | 22892  | 4.02E-10 | 0.8  |
| 27597 | 30429  | 31038  | 1.52E-07 | 0.9  |
| 27597 | 38593  | 39293  | 3.25E-07 | 0.82 |
| 27598 | 3046   | 3871   | 2.11E-69 | 0.86 |
| 27613 | 17000  | 18877  | 2.95E-52 | 0.83 |
| 27613 | 38936  | 40147  | 6.09E-31 | 0.79 |
| 27613 | 40348  | 41253  | 1.68E-43 | 0.9  |
| 27613 | 42395  | 43978  | 1.61E-94 | 0.91 |
| 27613 | 44210  | 45337  | 2.65E-52 | 0.88 |
| 27613 | 46488  | 47060  | 1.16E-10 | 0.76 |
| 27613 | 48492  | 48826  | 6.42E-21 | 0.9  |
| 27613 | 74475  | 75385  | 7.42E-16 | 0.64 |
| 27613 | 79471  | 79951  | 2.39E-26 | 0.73 |
| 27613 | 80783  | 81213  | 6.72E-30 | 0.89 |
| 27613 | 81520  | 81806  | 2.55E-24 | 0.89 |
| 27613 | 85799  | 86093  | 3.94E-07 | 0.67 |
| 27613 | 100137 | 100352 | 1.69E-29 | 0.87 |
| 27613 | 107230 | 107508 | 4.73E-24 | 0.97 |
| 27613 | 113977 | 114640 | 7.22E-50 | 0.71 |
| 27613 | 120044 | 120321 | 1.82E-16 | 0.8  |
| 27613 | 136872 | 137260 | 3.76E-61 | 0.91 |
| 27613 | 137584 | 137806 | 1.30E-17 | 0.71 |
| 27613 | 152913 | 153437 | 7.41E-39 | 0.9  |
| 27613 | 161617 | 162072 | 8.58E-45 | 0.8  |
| 27613 | 169528 | 169962 | 8.34E-19 | 0.91 |
| 27613 | 170778 | 171756 | 2.70E-76 | 0.81 |
| 27613 | 190552 | 191033 | 8.49E-14 | 0.78 |
| 27613 | 211935 | 212193 | 3.79E-11 | 0.82 |
| 27613 | 222479 | 222801 | 6.80E-13 | 0.89 |
| 27613 | 241017 | 242092 | 1.09E-69 | 0.77 |
| 27614 | 126537 | 126996 | 4.77E-05 | 0.86 |

|       |        |        |           |      |
|-------|--------|--------|-----------|------|
| 27614 | 154589 | 155070 | 5.70E-05  | 0.95 |
| 27622 | 4259   | 4717   | 7.89E-51  | 0.95 |
| 27622 | 7407   | 7855   | 4.75E-19  | 0.83 |
| 27622 | 25021  | 25382  | 5.38E-20  | 0.84 |
| 27622 | 26265  | 26644  | 1.90E-20  | 0.9  |
| 27622 | 38648  | 39050  | 2.15E-16  | 0.83 |
| 27622 | 40206  | 41031  | 8.65E-64  | 0.91 |
| 27622 | 65890  | 66285  | 1.21E-75  | 0.9  |
| 27622 | 66960  | 67178  | 5.79E-07  | 0.67 |
| 27623 | 21807  | 22263  | 1.44E-29  | 0.9  |
| 27623 | 22464  | 22686  | 4.29E-39  | 0.9  |
| 27623 | 27768  | 28776  | 2.32E-24  | 0.81 |
| 27623 | 29164  | 30562  | 1.68E-30  | 0.8  |
| 27623 | 30648  | 31502  | 2.13E-27  | 0.82 |
| 27623 | 37175  | 37642  | 5.06E-08  | 0.79 |
| 27623 | 39937  | 40220  | 7.51E-42  | 0.88 |
| 27623 | 56873  | 57554  | 1.62E-44  | 0.94 |
| 27623 | 59530  | 61293  | 9.57E-56  | 0.68 |
| 27623 | 61935  | 62452  | 5.84E-41  | 0.93 |
| 27623 | 63196  | 63648  | 9.11E-15  | 0.88 |
| 27632 | 35214  | 35596  | 1.90E-20  | 0.75 |
| 27632 | 38797  | 39083  | 2.31E-21  | 0.86 |
| 27632 | 42349  | 42940  | 2.40E-57  | 0.9  |
| 27632 | 43221  | 44960  | 1.94E-129 | 0.91 |
| 27632 | 52721  | 53276  | 1.01E-71  | 0.85 |
| 27632 | 53697  | 54067  | 6.12E-47  | 0.9  |
| 27632 | 54689  | 55146  | 4.40E-40  | 0.89 |
| 27632 | 65078  | 65316  | 6.94E-08  | 0.79 |
| 27632 | 76192  | 76775  | 1.26E-25  | 0.78 |
| 27632 | 78582  | 79254  | 1.76E-29  | 0.74 |
| 27637 | 34543  | 34936  | 2.89E-12  | 0.62 |
| 27637 | 40401  | 41868  | 4.82E-81  | 0.63 |
| 27637 | 50761  | 50996  | 4.29E-08  | 0.86 |
| 27646 | 1980   | 2211   | 2.68E-14  | 0.93 |
| 27647 | 25301  | 26096  | 1.56E-26  | 0.83 |
| 27647 | 26905  | 27713  | 1.19E-23  | 0.77 |
| 27647 | 47328  | 47898  | 4.38E-23  | 0.81 |
| 27647 | 49126  | 49809  | 1.43E-15  | 0.78 |
| 27647 | 50127  | 50996  | 1.48E-27  | 0.63 |
| 27647 | 67744  | 68305  | 8.99E-34  | 0.86 |
| 27647 | 68906  | 69324  | 4.45E-24  | 0.84 |
| 27651 | 9769   | 10286  | 4.79E-28  | 0.73 |
| 27651 | 24437  | 24677  | 4.06E-27  | 0.9  |
| 27651 | 24881  | 25637  | 7.98E-93  | 0.85 |
| 27651 | 32027  | 32532  | 1.64E-08  | 0.79 |
| 27651 | 32191  | 32541  | 1.47E-09  | 0.74 |
| 27651 | 38821  | 39070  | 2.88E-37  | 0.97 |
| 27651 | 48240  | 48845  | 2.41E-25  | 0.86 |
| 27651 | 49182  | 50188  | 2.13E-59  | 0.84 |
| 27651 | 64279  | 64509  | 9.44E-16  | 0.9  |
| 27651 | 68681  | 69056  | 2.16E-35  | 0.81 |
| 27651 | 75631  | 75848  | 1.12E-19  | 0.79 |
| 27660 | 29975  | 30564  | 1.01E-12  | 0.72 |

|       |        |        |          |      |
|-------|--------|--------|----------|------|
| 27660 | 38730  | 39377  | 1.72E-54 | 0.93 |
| 27660 | 40032  | 40648  | 4.89E-17 | 0.71 |
| 27660 | 46067  | 46423  | 5.34E-08 | 0.63 |
| 27679 | 1853   | 2092   | 5.24E-08 | 0.89 |
| 27687 | 13688  | 13969  | 1.39E-12 | 0.94 |
| 27695 | 18168  | 18375  | 8.23E-06 | 0.98 |
| 27699 | 906    | 1388   | 2.23E-19 | 0.82 |
| 27699 | 8743   | 9400   | 3.27E-08 | 0.72 |
| 27699 | 43299  | 43718  | 7.59E-15 | 0.79 |
| 27699 | 70733  | 71106  | 1.66E-19 | 0.71 |
| 27699 | 84492  | 84804  | 7.85E-16 | 0.84 |
| 27699 | 87305  | 87854  | 1.10E-50 | 0.99 |
| 27699 | 89956  | 90264  | 1.41E-16 | 0.95 |
| 27699 | 122571 | 122778 | 7.79E-07 | 0.79 |
| 27699 | 142753 | 143011 | 1.24E-32 | 0.94 |
| 27699 | 143221 | 143835 | 1.59E-44 | 0.94 |
| 27700 | 13480  | 13873  | 6.53E-09 | 1    |
| 27704 | 3672   | 4174   | 5.19E-11 | 0.77 |
| 27704 | 8053   | 8924   | 1.13E-14 | 0.75 |
| 27704 | 26951  | 27589  | 5.68E-57 | 0.93 |
| 27704 | 31220  | 31785  | 1.33E-23 | 0.87 |
| 27704 | 32032  | 33095  | 9.56E-48 | 0.84 |
| 27704 | 35309  | 36604  | 4.46E-35 | 0.67 |
| 27704 | 36881  | 37177  | 1.38E-33 | 0.92 |
| 27704 | 50384  | 50739  | 2.17E-34 | 0.78 |
| 27704 | 53117  | 53821  | 5.16E-29 | 0.9  |
| 27704 | 58371  | 58658  | 2.57E-27 | 0.84 |
| 27704 | 68796  | 70121  | 4.20E-52 | 0.86 |
| 27714 | 42952  | 43153  | 1.61E-11 | 0.8  |
| 27714 | 65752  | 66042  | 5.83E-10 | 0.93 |
| 27715 | 15179  | 15772  | 5.74E-18 | 0.73 |
| 27715 | 24121  | 24889  | 6.77E-16 | 0.69 |
| 27715 | 28063  | 29000  | 3.78E-58 | 0.94 |
| 27715 | 71604  | 72007  | 5.78E-25 | 0.87 |
| 27715 | 83159  | 83534  | 1.50E-11 | 0.89 |
| 27715 | 101918 | 102542 | 2.91E-29 | 0.66 |
| 27715 | 135237 | 135578 | 8.52E-06 | 0.86 |
| 27715 | 148907 | 149373 | 2.86E-19 | 0.72 |
| 27715 | 153046 | 153508 | 1.59E-13 | 0.83 |
| 27716 | 9061   | 9579   | 2.71E-21 | 0.85 |
| 27716 | 12562  | 13649  | 1.15E-49 | 0.82 |
| 27717 | 20062  | 21613  | 6.14E-52 | 0.74 |
| 27717 | 41581  | 43222  | 1.23E-91 | 0.89 |
| 27717 | 45012  | 45927  | 1.55E-52 | 0.87 |
| 27718 | 5463   | 5668   | 5.97E-25 | 0.94 |
| 27718 | 73482  | 73693  | 3.50E-10 | 0.94 |
| 27718 | 76157  | 76642  | 3.28E-05 | 0.88 |
| 27721 | 14848  | 15384  | 3.42E-42 | 0.93 |
| 27721 | 15594  | 16118  | 6.80E-20 | 0.77 |
| 27731 | 37959  | 38174  | 6.34E-08 | 0.86 |
| 27732 | 31615  | 31944  | 8.73E-12 | 0.81 |
| 27732 | 36072  | 37124  | 1.94E-69 | 0.91 |
| 27732 | 37404  | 37902  | 2.28E-67 | 0.91 |



|       |        |        |           |      |
|-------|--------|--------|-----------|------|
| 27732 | 48398  | 49382  | 1.31E-33  | 0.78 |
| 27732 | 53748  | 53977  | 1.83E-15  | 0.81 |
| 27732 | 55730  | 56163  | 1.81E-52  | 0.88 |
| 27732 | 57189  | 57880  | 3.03E-96  | 0.92 |
| 27732 | 58835  | 59267  | 4.17E-57  | 0.81 |
| 27732 | 120575 | 120801 | 1.88E-58  | 0.83 |
| 27732 | 133044 | 134075 | 4.09E-127 | 0.94 |
| 27741 | 10219  | 10585  | 2.35E-03  | 0.93 |
| 27741 | 16254  | 16720  | 3.75E-14  | 0.81 |
| 27742 | 21248  | 21550  | 5.29E-10  | 0.7  |
| 27742 | 23429  | 24248  | 1.39E-19  | 0.84 |
| 27742 | 36170  | 36584  | 2.04E-15  | 0.8  |
| 27742 | 92247  | 92857  | 1.02E-71  | 0.94 |
| 27742 | 108265 | 108762 | 2.60E-10  | 0.67 |
| 27742 | 118648 | 119045 | 1.13E-11  | 0.76 |
| 27742 | 137766 | 138469 | 7.70E-24  | 0.84 |
| 27742 | 168980 | 169277 | 7.01E-43  | 0.95 |
| 27743 | 7015   | 7286   | 2.30E-04  | 0.96 |
| 27743 | 12267  | 12485  | 8.92E-07  | 0.87 |
| 27743 | 16288  | 16534  | 4.94E-29  | 0.86 |
| 27743 | 19201  | 19545  | 2.08E-04  | 0.97 |
| 27743 | 22962  | 23202  | 1.53E-06  | 0.84 |
| 27744 | 6483   | 7397   | 2.07E-64  | 0.78 |
| 27744 | 21489  | 21992  | 1.66E-15  | 0.79 |
| 27744 | 29282  | 30499  | 1.26E-72  | 0.89 |
| 27744 | 34994  | 35646  | 6.24E-33  | 0.74 |
| 27744 | 35850  | 36093  | 4.10E-22  | 0.88 |
| 27744 | 37091  | 37762  | 4.63E-44  | 0.93 |
| 27744 | 38143  | 38869  | 5.44E-92  | 0.91 |
| 27744 | 39548  | 39892  | 5.13E-38  | 0.88 |
| 27744 | 48238  | 48809  | 1.86E-65  | 0.93 |
| 27744 | 80756  | 81058  | 8.29E-18  | 0.78 |
| 27744 | 83733  | 84318  | 2.52E-25  | 0.82 |
| 27744 | 86499  | 86946  | 2.09E-17  | 0.84 |
| 27744 | 91739  | 92150  | 3.34E-23  | 0.65 |
| 27747 | 30736  | 31145  | 1.16E-19  | 0.93 |
| 27747 | 32522  | 32915  | 2.67E-29  | 0.95 |
| 27747 | 41184  | 41675  | 7.88E-48  | 0.73 |
| 27747 | 61769  | 62415  | 2.79E-175 | 0.96 |
| 27747 | 62736  | 63561  | 2.67E-85  | 0.93 |
| 27747 | 66671  | 67319  | 4.89E-87  | 0.97 |
| 27747 | 68095  | 68484  | 1.68E-73  | 0.92 |
| 27747 | 68713  | 69426  | 2.04E-31  | 0.9  |
| 27747 | 74963  | 75207  | 4.58E-25  | 0.93 |
| 27747 | 76105  | 76320  | 6.36E-19  | 0.91 |
| 27749 | 1666   | 2977   | 3.14E-44  | 0.83 |
| 27749 | 9381   | 9805   | 1.95E-31  | 0.95 |
| 27749 | 11801  | 12859  | 1.49E-49  | 0.89 |
| 27749 | 14299  | 15488  | 6.72E-50  | 0.88 |
| 27749 | 25192  | 26041  | 7.82E-45  | 0.81 |
| 27749 | 32667  | 33229  | 2.36E-28  | 0.83 |
| 27749 | 33661  | 34081  | 1.82E-13  | 0.75 |
| 27749 | 61727  | 62165  | 2.36E-16  | 0.87 |

|       |        |        |           |      |
|-------|--------|--------|-----------|------|
| 27749 | 85881  | 86366  | 5.59E-23  | 0.91 |
| 27749 | 131779 | 132693 | 1.88E-24  | 0.62 |
| 27749 | 134631 | 134901 | 3.66E-08  | 0.81 |
| 27749 | 135409 | 135677 | 5.11E-43  | 0.86 |
| 27749 | 136759 | 137236 | 4.80E-56  | 0.9  |
| 27749 | 137737 | 137969 | 7.59E-33  | 0.91 |
| 27749 | 138287 | 138766 | 4.37E-31  | 0.82 |
| 27749 | 141756 | 142262 | 1.10E-33  | 0.93 |
| 27749 | 144289 | 145393 | 2.10E-79  | 0.71 |
| 27749 | 162498 | 162872 | 2.98E-19  | 0.61 |
| 27751 | 104225 | 104830 | 1.25E-18  | 0.78 |
| 27751 | 114922 | 115704 | 2.69E-28  | 0.69 |
| 27751 | 118441 | 118724 | 8.05E-10  | 0.67 |
| 27751 | 121179 | 121551 | 3.64E-09  | 0.75 |
| 27751 | 121845 | 122496 | 9.56E-23  | 0.88 |
| 27751 | 123161 | 124087 | 9.59E-46  | 0.94 |
| 27751 | 134208 | 134495 | 6.89E-15  | 0.65 |
| 27751 | 134792 | 136839 | 6.03E-61  | 0.83 |
| 27751 | 137133 | 137428 | 1.57E-18  | 0.83 |
| 27752 | 8      | 229    | 4.16E-31  | 0.93 |
| 27752 | 6921   | 7698   | 4.19E-13  | 0.83 |
| 27752 | 12980  | 13431  | 1.37E-14  | 0.8  |
| 27753 | 6234   | 6616   | 2.78E-06  | 0.79 |
| 27754 | 1802   | 2179   | 5.56E-16  | 0.85 |
| 27755 | 7756   | 7973   | 1.87E-19  | 0.84 |
| 27755 | 19095  | 19864  | 1.08E-33  | 0.8  |
| 27755 | 47854  | 48293  | 3.69E-77  | 0.93 |
| 27755 | 57729  | 58476  | 1.34E-63  | 0.83 |
| 27755 | 68368  | 69292  | 7.12E-40  | 0.7  |
| 27758 | 4236   | 5099   | 4.35E-74  | 0.96 |
| 27758 | 19893  | 20329  | 2.06E-15  | 0.73 |
| 27758 | 45387  | 46285  | 2.38E-26  | 0.81 |
| 27758 | 47796  | 48095  | 1.61E-12  | 0.8  |
| 27758 | 51734  | 52153  | 6.06E-39  | 0.94 |
| 27758 | 63176  | 63506  | 8.91E-13  | 0.79 |
| 27758 | 70391  | 70818  | 1.03E-13  | 0.77 |
| 27758 | 71133  | 72623  | 7.52E-133 | 0.85 |
| 27758 | 80531  | 81755  | 9.78E-63  | 0.78 |
| 27758 | 98775  | 99370  | 5.67E-35  | 0.95 |
| 27758 | 101521 | 103841 | 1.19E-113 | 0.91 |
| 27758 | 105228 | 105529 | 1.20E-20  | 0.85 |
| 27758 | 105738 | 106295 | 2.97E-23  | 0.9  |
| 27758 | 117363 | 119368 | 1.93E-40  | 0.77 |
| 27758 | 128933 | 129426 | 1.13E-55  | 0.92 |
| 27758 | 130763 | 130989 | 3.36E-05  | 0.79 |
| 27758 | 133363 | 133823 | 6.85E-20  | 0.72 |
| 27758 | 143524 | 144202 | 2.95E-52  | 0.88 |
| 27758 | 166800 | 167820 | 1.05E-56  | 0.8  |
| 27758 | 168871 | 169355 | 3.52E-15  | 0.76 |
| 27758 | 170272 | 170703 | 6.44E-17  | 0.83 |
| 27758 | 171075 | 171323 | 1.77E-28  | 0.95 |
| 27758 | 173864 | 174282 | 2.68E-26  | 0.86 |
| 27763 | 36396  | 36816  | 1.63E-64  | 0.95 |

|       |        |        |           |      |
|-------|--------|--------|-----------|------|
| 27763 | 43979  | 44260  | 5.30E-12  | 0.8  |
| 27766 | 510    | 1054   | 3.78E-63  | 0.86 |
| 27766 | 22429  | 22658  | 4.77E-17  | 0.97 |
| 27766 | 27547  | 28070  | 6.26E-20  | 0.73 |
| 27766 | 31875  | 32397  | 2.11E-15  | 0.8  |
| 27766 | 40004  | 40334  | 2.83E-15  | 0.85 |
| 27766 | 42749  | 43542  | 3.24E-63  | 0.96 |
| 27766 | 47892  | 48645  | 1.99E-29  | 0.81 |
| 27766 | 50534  | 50869  | 2.71E-33  | 0.94 |
| 27766 | 73873  | 75134  | 4.23E-103 | 0.89 |
| 27766 | 76659  | 77119  | 6.03E-19  | 0.91 |
| 27766 | 80609  | 80904  | 2.64E-12  | 0.72 |
| 27766 | 82083  | 82921  | 3.95E-39  | 0.84 |
| 27766 | 84121  | 84616  | 2.75E-28  | 0.85 |
| 27766 | 85774  | 86175  | 6.72E-31  | 0.87 |
| 27766 | 103776 | 104809 | 1.39E-76  | 0.95 |
| 27766 | 108938 | 109164 | 6.99E-45  | 0.88 |
| 27769 | 16195  | 16617  | 3.93E-10  | 0.86 |
| 27769 | 21193  | 21688  | 1.76E-39  | 0.84 |
| 27770 | 579    | 1186   | 7.74E-18  | 0.86 |
| 27770 | 13553  | 14074  | 3.18E-15  | 0.71 |
| 27771 | 32410  | 32651  | 1.59E-21  | 0.78 |
| 27773 | 900    | 1503   | 6.81E-11  | 0.84 |
| 27777 | 6816   | 7378   | 3.34E-71  | 0.85 |
| 27777 | 7610   | 9846   | 9.35E-189 | 0.76 |
| 27777 | 25902  | 26186  | 5.79E-20  | 0.9  |
| 27777 | 26834  | 27208  | 6.20E-40  | 0.91 |
| 27777 | 32378  | 33065  | 5.77E-33  | 0.65 |
| 27777 | 33388  | 33985  | 9.22E-42  | 0.8  |
| 27777 | 48358  | 48831  | 2.96E-71  | 0.83 |
| 27777 | 49153  | 49765  | 8.01E-22  | 0.78 |
| 27777 | 57560  | 58395  | 6.08E-34  | 0.88 |
| 27777 | 58665  | 58985  | 1.25E-24  | 0.87 |
| 27777 | 59446  | 60244  | 8.08E-36  | 0.79 |
| 27777 | 64324  | 64719  | 4.89E-29  | 0.89 |
| 27777 | 66409  | 67183  | 3.56E-28  | 0.77 |
| 27777 | 71518  | 72281  | 4.32E-35  | 0.8  |
| 27777 | 78066  | 78520  | 2.22E-13  | 0.8  |
| 27777 | 84506  | 84876  | 2.27E-16  | 0.9  |
| 27777 | 98182  | 98445  | 4.21E-31  | 0.74 |
| 27783 | 785    | 1403   | 6.15E-42  | 0.82 |
| 27784 | 1972   | 2839   | 6.00E-15  | 0.94 |
| 27787 | 7533   | 8024   | 1.37E-81  | 0.89 |
| 27791 | 2184   | 2689   | 9.12E-16  | 0.68 |
| 27791 | 8086   | 8367   | 1.58E-22  | 0.85 |
| 27791 | 13155  | 13954  | 6.79E-31  | 0.85 |
| 27791 | 14223  | 14506  | 4.84E-23  | 0.91 |
| 27791 | 26678  | 26952  | 1.05E-12  | 0.95 |
| 27791 | 32177  | 32804  | 7.88E-51  | 0.96 |
| 27791 | 34188  | 34689  | 2.82E-26  | 0.91 |
| 27791 | 36132  | 37154  | 1.67E-40  | 0.63 |
| 27791 | 38086  | 38470  | 4.85E-17  | 0.76 |
| 27791 | 38879  | 39163  | 3.14E-28  | 0.88 |

|       |        |        |           |      |
|-------|--------|--------|-----------|------|
| 27791 | 39384  | 40590  | 1.35E-140 | 0.87 |
| 27791 | 40910  | 41908  | 2.05E-52  | 0.88 |
| 27791 | 44103  | 44458  | 9.19E-23  | 0.86 |
| 27791 | 55708  | 55938  | 4.51E-10  | 0.72 |
| 27792 | 10317  | 10809  | 2.74E-07  | 0.98 |
| 27795 | 2242   | 2547   | 2.74E-05  | 0.85 |
| 27795 | 20675  | 20916  | 7.18E-09  | 0.86 |
| 27795 | 27757  | 27970  | 3.03E-05  | 0.92 |
| 27795 | 31711  | 32249  | 7.15E-10  | 0.77 |
| 27797 | 6988   | 8452   | 4.67E-95  | 0.89 |
| 27798 | 17454  | 17871  | 3.27E-27  | 0.9  |
| 27798 | 18539  | 18864  | 9.09E-47  | 0.96 |
| 27798 | 19911  | 20372  | 1.50E-09  | 0.73 |
| 27798 | 23654  | 24079  | 8.92E-38  | 0.83 |
| 27798 | 25900  | 26285  | 4.17E-10  | 0.63 |
| 27798 | 27650  | 29028  | 3.36E-52  | 0.82 |
| 27798 | 31200  | 31820  | 4.73E-42  | 0.73 |
| 27798 | 32022  | 32470  | 1.64E-26  | 0.92 |
| 27798 | 33749  | 34074  | 8.19E-23  | 0.89 |
| 27798 | 57669  | 58306  | 4.67E-51  | 0.92 |
| 27798 | 58726  | 59543  | 6.64E-36  | 0.86 |
| 27798 | 59898  | 60481  | 6.66E-53  | 0.96 |
| 27798 | 72966  | 73900  | 1.49E-77  | 0.84 |
| 27798 | 74126  | 75235  | 5.10E-124 | 0.91 |
| 27798 | 81342  | 83058  | 1.37E-110 | 0.88 |
| 27798 | 83280  | 83713  | 8.20E-19  | 0.93 |
| 27798 | 109178 | 109435 | 5.61E-24  | 0.94 |
| 27798 | 110690 | 111330 | 2.74E-45  | 0.86 |
| 27798 | 162366 | 162928 | 2.35E-23  | 0.89 |
| 27798 | 165904 | 166317 | 1.25E-52  | 0.9  |
| 27798 | 167433 | 168057 | 4.03E-31  | 0.75 |
| 27798 | 268017 | 268508 | 2.48E-15  | 0.84 |
| 27802 | 51139  | 51383  | 1.22E-07  | 0.9  |
| 27807 | 3260   | 3530   | 3.18E-10  | 0.83 |
| 27807 | 7186   | 7619   | 1.26E-33  | 0.85 |
| 27807 | 12709  | 14121  | 2.91E-65  | 0.74 |
| 27810 | 5312   | 5837   | 2.74E-20  | 0.74 |
| 27810 | 8228   | 8639   | 1.48E-16  | 0.63 |
| 27810 | 28717  | 31368  | 4.00E-180 | 0.83 |
| 27810 | 54129  | 54671  | 1.07E-11  | 0.81 |
| 27810 | 57660  | 60024  | 3.65E-218 | 0.85 |
| 27810 | 64839  | 65666  | 2.69E-23  | 0.79 |
| 27810 | 85606  | 85863  | 6.03E-45  | 0.96 |
| 27810 | 87116  | 87609  | 2.23E-33  | 0.91 |
| 27810 | 89701  | 90589  | 1.13E-31  | 0.83 |
| 27810 | 112533 | 112964 | 3.67E-33  | 0.85 |
| 27810 | 113782 | 114032 | 2.72E-22  | 0.84 |
| 27810 | 115339 | 115651 | 4.51E-21  | 0.94 |
| 27810 | 116166 | 117154 | 4.02E-59  | 0.88 |
| 27810 | 117419 | 118415 | 5.32E-29  | 0.83 |
| 27810 | 142952 | 143617 | 2.83E-51  | 0.88 |
| 27810 | 148211 | 148584 | 2.33E-32  | 0.74 |
| 27810 | 149803 | 150151 | 1.62E-20  | 0.85 |

|       |        |        |           |      |
|-------|--------|--------|-----------|------|
| 27810 | 151258 | 152458 | 1.07E-95  | 0.92 |
| 27810 | 153368 | 153937 | 6.65E-46  | 0.82 |
| 27810 | 154511 | 155071 | 8.47E-45  | 0.82 |
| 27810 | 165512 | 166829 | 2.65E-46  | 0.87 |
| 27810 | 184985 | 185244 | 7.75E-18  | 0.9  |
| 27810 | 201479 | 201869 | 5.73E-16  | 0.81 |
| 27810 | 208144 | 209259 | 3.19E-78  | 0.87 |
| 27810 | 237234 | 237474 | 3.25E-13  | 0.89 |
| 27810 | 276326 | 277346 | 6.96E-55  | 0.71 |
| 27810 | 279286 | 280016 | 1.09E-36  | 0.66 |
| 27810 | 285190 | 285486 | 1.67E-12  | 0.82 |
| 27810 | 306157 | 306671 | 2.31E-18  | 0.68 |
| 27810 | 306928 | 307866 | 3.18E-66  | 0.66 |
| 27810 | 310353 | 311093 | 5.93E-36  | 0.64 |
| 27810 | 321741 | 322684 | 2.08E-31  | 0.85 |
| 27810 | 329644 | 330130 | 7.45E-36  | 0.82 |
| 27810 | 341606 | 342004 | 1.05E-13  | 0.65 |
| 27811 | 7710   | 8458   | 1.42E-75  | 0.89 |
| 27811 | 8768   | 9078   | 4.26E-25  | 0.81 |
| 27811 | 13025  | 14467  | 2.82E-43  | 0.86 |
| 27811 | 18820  | 20240  | 2.90E-63  | 0.79 |
| 27811 | 32770  | 33427  | 7.08E-62  | 0.93 |
| 27816 | 1984   | 2286   | 4.33E-05  | 0.93 |
| 27822 | 6858   | 7168   | 1.98E-11  | 0.88 |
| 27822 | 15261  | 15604  | 1.49E-07  | 0.85 |
| 27825 | 4496   | 4731   | 1.06E-05  | 0.97 |
| 27827 | 10374  | 11449  | 5.43E-108 | 0.96 |
| 27827 | 11994  | 12555  | 1.73E-51  | 0.96 |
| 27827 | 13435  | 13990  | 3.89E-24  | 0.9  |
| 27827 | 18226  | 18504  | 5.32E-19  | 0.82 |
| 27827 | 23246  | 23592  | 7.60E-07  | 0.87 |
| 27828 | 41156  | 41382  | 4.72E-12  | 0.69 |
| 27828 | 44946  | 45936  | 9.88E-49  | 0.72 |
| 27828 | 47333  | 47595  | 3.15E-34  | 0.84 |
| 27828 | 67088  | 67429  | 8.07E-10  | 0.6  |
| 27828 | 68142  | 68495  | 1.50E-19  | 0.89 |
| 27831 | 29785  | 30600  | 1.34E-15  | 0.7  |
| 27837 | 3107   | 3392   | 9.53E-09  | 0.62 |
| 27837 | 14637  | 15982  | 1.34E-196 | 0.88 |
| 27837 | 16231  | 16726  | 3.56E-201 | 0.95 |
| 27837 | 16959  | 17311  | 3.50E-283 | 0.93 |
| 27837 | 17989  | 18746  | 4.87E-259 | 0.86 |
| 27837 | 19613  | 19849  | 1.63E-127 | 0.92 |
| 27837 | 24716  | 25708  | 1.69E-34  | 0.85 |
| 27837 | 68221  | 68521  | 1.03E-22  | 0.76 |
| 27837 | 79875  | 80373  | 2.32E-16  | 0.83 |
| 27837 | 85574  | 86633  | 1.42E-43  | 0.78 |
| 27837 | 86836  | 87300  | 4.40E-12  | 0.8  |
| 27837 | 89325  | 89879  | 7.81E-13  | 0.82 |
| 27837 | 90183  | 90481  | 1.65E-12  | 0.82 |
| 27837 | 94026  | 94642  | 1.27E-13  | 0.78 |
| 27843 | 21713  | 22298  | 9.09E-42  | 0.82 |
| 27843 | 22684  | 22984  | 4.03E-15  | 0.84 |

|       |        |        |          |      |
|-------|--------|--------|----------|------|
| 27843 | 37904  | 38622  | 1.24E-18 | 0.8  |
| 27843 | 39810  | 40204  | 1.57E-40 | 0.96 |
| 27843 | 41015  | 41436  | 8.31E-12 | 0.88 |
| 27843 | 45002  | 45555  | 1.36E-32 | 0.83 |
| 27847 | 12765  | 13045  | 7.86E-09 | 0.71 |
| 27847 | 20965  | 22265  | 3.66E-32 | 0.79 |
| 27847 | 22497  | 22867  | 4.68E-49 | 0.83 |
| 27847 | 27880  | 28498  | 1.22E-46 | 0.61 |
| 27856 | 9000   | 9781   | 6.69E-34 | 0.66 |
| 27858 | 26608  | 27017  | 2.16E-17 | 0.83 |
| 27860 | 12077  | 12463  | 8.21E-55 | 0.93 |
| 27860 | 19212  | 19651  | 5.54E-24 | 0.83 |
| 27866 | 5722   | 6046   | 2.35E-13 | 0.86 |
| 27866 | 72362  | 73368  | 3.15E-72 | 0.87 |
| 27866 | 104071 | 105477 | 7.26E-40 | 0.88 |
| 27866 | 105716 | 106368 | 6.63E-35 | 0.81 |
| 27872 | 1030   | 1280   | 4.48E-05 | 0.88 |
| 27887 | 3928   | 4484   | 3.26E-14 | 0.82 |
| 27887 | 7739   | 8495   | 3.10E-34 | 0.79 |
| 27887 | 16018  | 16469  | 2.70E-44 | 0.97 |
| 27889 | 38982  | 39605  | 9.41E-23 | 0.97 |
| 27889 | 48189  | 48597  | 8.98E-07 | 0.82 |
| 27889 | 60499  | 61726  | 1.48E-73 | 0.79 |
| 27889 | 83619  | 84268  | 3.34E-17 | 0.76 |
| 27890 | 13893  | 14586  | 3.00E-10 | 0.92 |
| 27893 | 61693  | 61970  | 1.68E-06 | 0.71 |
| 27893 | 77812  | 78255  | 1.22E-38 | 0.94 |
| 27893 | 105674 | 105896 | 1.11E-16 | 0.87 |
| 27894 | 29868  | 30584  | 3.36E-13 | 0.76 |
| 27894 | 31666  | 32004  | 2.13E-31 | 0.94 |
| 27894 | 42847  | 43603  | 6.05E-27 | 0.83 |
| 27894 | 47297  | 47811  | 3.83E-21 | 0.72 |
| 27894 | 49200  | 49649  | 1.47E-16 | 0.79 |
| 27894 | 106237 | 106517 | 2.58E-21 | 0.75 |
| 27894 | 108309 | 108678 | 6.73E-21 | 0.69 |
| 27894 | 163555 | 164165 | 2.67E-40 | 0.92 |
| 27894 | 165369 | 165666 | 1.91E-09 | 0.64 |
| 27894 | 166664 | 167909 | 7.85E-80 | 0.8  |
| 27894 | 168766 | 169558 | 1.23E-32 | 0.63 |
| 27894 | 173468 | 174570 | 1.17E-37 | 0.9  |
| 27894 | 176149 | 176452 | 4.93E-08 | 0.98 |
| 27894 | 211173 | 211824 | 2.79E-12 | 0.67 |
| 27894 | 212049 | 212476 | 1.36E-15 | 0.76 |
| 27894 | 217747 | 218529 | 6.95E-59 | 0.93 |
| 27894 | 230199 | 230426 | 9.87E-09 | 0.86 |
| 27894 | 232249 | 233141 | 1.23E-70 | 0.63 |
| 27894 | 234414 | 234838 | 3.12E-16 | 0.88 |
| 27894 | 237365 | 237601 | 1.08E-26 | 0.95 |
| 27894 | 239105 | 239707 | 1.47E-22 | 0.85 |
| 27894 | 240228 | 240685 | 3.92E-38 | 0.97 |
| 27894 | 241950 | 242557 | 4.08E-23 | 0.83 |
| 27894 | 242890 | 243321 | 3.81E-23 | 0.88 |
| 27894 | 263865 | 264678 | 6.85E-30 | 0.88 |

|       |        |        |           |      |
|-------|--------|--------|-----------|------|
| 27894 | 264902 | 265561 | 2.30E-21  | 0.82 |
| 27894 | 275717 | 276113 | 9.97E-52  | 0.91 |
| 27894 | 284862 | 285404 | 3.89E-15  | 0.63 |
| 27894 | 288652 | 289152 | 1.01E-12  | 0.93 |
| 27894 | 290124 | 290808 | 1.68E-43  | 0.75 |
| 27894 | 291057 | 291508 | 5.53E-09  | 0.65 |
| 27894 | 301503 | 303481 | 1.32E-117 | 0.91 |
| 27894 | 303807 | 304178 | 1.96E-47  | 0.97 |
| 27894 | 304391 | 305114 | 2.35E-98  | 0.91 |
| 27894 | 365054 | 365512 | 2.31E-62  | 0.86 |
| 27894 | 367766 | 368014 | 9.86E-20  | 0.86 |
| 27894 | 370682 | 370935 | 1.31E-19  | 0.68 |
| 27894 | 371349 | 371991 | 2.43E-21  | 0.8  |
| 27894 | 375396 | 375758 | 4.79E-54  | 0.91 |
| 27894 | 376812 | 377242 | 1.54E-21  | 0.86 |
| 27894 | 377898 | 378260 | 6.53E-23  | 0.86 |
| 27894 | 387048 | 387521 | 9.14E-16  | 0.84 |
| 27894 | 418376 | 419920 | 1.78E-58  | 0.76 |
| 27894 | 452922 | 453221 | 2.42E-07  | 0.71 |
| 27894 | 462439 | 462825 | 8.79E-16  | 0.79 |
| 27894 | 464542 | 465429 | 1.19E-42  | 0.86 |
| 27894 | 465744 | 466755 | 2.08E-51  | 0.84 |
| 27894 | 468443 | 468666 | 1.99E-19  | 0.82 |
| 27894 | 469316 | 469679 | 3.95E-37  | 0.91 |
| 27894 | 489876 | 491219 | 5.63E-124 | 0.9  |
| 27895 | 12055  | 12511  | 8.28E-13  | 0.79 |
| 27895 | 16377  | 17512  | 1.56E-37  | 0.92 |
| 27895 | 27582  | 28443  | 8.56E-60  | 0.85 |
| 27901 | 1558   | 1811   | 1.26E-08  | 0.97 |
| 27902 | 61439  | 61918  | 3.41E-04  | 0.88 |
| 27904 | 14585  | 14962  | 8.22E-47  | 0.79 |
| 27904 | 17764  | 18243  | 2.66E-21  | 0.83 |
| 27904 | 25628  | 26615  | 1.23E-37  | 0.93 |
| 27904 | 28181  | 29723  | 3.02E-46  | 0.67 |
| 27904 | 30320  | 31669  | 5.94E-118 | 0.92 |
| 27904 | 57295  | 57583  | 1.62E-22  | 0.8  |
| 27904 | 63658  | 64031  | 1.25E-28  | 0.88 |
| 27904 | 89452  | 90283  | 2.27E-47  | 0.82 |
| 27904 | 90545  | 90866  | 2.54E-15  | 0.79 |
| 27904 | 91182  | 91603  | 4.07E-15  | 0.66 |
| 27904 | 92245  | 92698  | 4.89E-21  | 0.83 |
| 27904 | 93006  | 93505  | 2.01E-39  | 0.86 |
| 27904 | 98820  | 99120  | 1.96E-12  | 0.73 |
| 27905 | 10150  | 10938  | 1.39E-45  | 0.93 |
| 27905 | 11627  | 12297  | 2.78E-102 | 0.93 |
| 27905 | 26178  | 26712  | 4.17E-24  | 0.9  |
| 27905 | 35629  | 35937  | 5.34E-36  | 0.83 |
| 27905 | 36150  | 37024  | 1.25E-54  | 0.88 |
| 27909 | 1388   | 1939   | 1.73E-06  | 0.89 |
| 27913 | 3983   | 4857   | 2.15E-16  | 0.8  |
| 27913 | 19714  | 20290  | 3.26E-12  | 0.8  |
| 27914 | 1562   | 2019   | 5.33E-18  | 0.62 |
| 27914 | 22290  | 22884  | 5.11E-47  | 0.94 |

|       |        |        |           |      |
|-------|--------|--------|-----------|------|
| 27914 | 24431  | 24723  | 6.62E-54  | 0.97 |
| 27914 | 28952  | 29284  | 1.30E-55  | 0.9  |
| 27914 | 51708  | 52184  | 4.54E-35  | 0.88 |
| 27914 | 95536  | 96269  | 7.34E-36  | 0.67 |
| 27914 | 98187  | 98418  | 5.97E-15  | 0.74 |
| 27914 | 100917 | 102080 | 5.28E-55  | 0.89 |
| 27914 | 105764 | 106524 | 1.87E-21  | 0.84 |
| 27914 | 128440 | 128849 | 2.47E-34  | 0.82 |
| 27914 | 139076 | 139362 | 1.42E-38  | 0.97 |
| 27914 | 139612 | 139975 | 6.94E-23  | 0.93 |
| 27914 | 140591 | 140982 | 1.79E-12  | 0.81 |
| 27914 | 178198 | 178484 | 1.54E-27  | 0.96 |
| 27914 | 178717 | 179767 | 3.06E-108 | 0.95 |
| 27914 | 212145 | 213123 | 1.99E-47  | 0.95 |
| 27914 | 213363 | 213609 | 6.41E-11  | 0.79 |
| 27914 | 228610 | 229953 | 6.43E-56  | 0.62 |
| 27914 | 230192 | 230560 | 1.68E-80  | 0.93 |
| 27914 | 253084 | 253669 | 9.67E-34  | 0.89 |
| 27914 | 258212 | 258470 | 6.28E-11  | 0.7  |
| 27914 | 262326 | 262797 | 8.06E-14  | 0.83 |
| 27916 | 10264  | 10869  | 9.33E-35  | 0.82 |
| 27916 | 11701  | 12163  | 1.74E-32  | 0.91 |
| 27916 | 13071  | 13558  | 5.22E-23  | 0.69 |
| 27916 | 18128  | 18383  | 1.10E-22  | 0.91 |
| 27916 | 18415  | 18725  | 7.38E-12  | 0.82 |
| 27916 | 19357  | 19942  | 5.55E-40  | 0.9  |
| 27916 | 22521  | 22847  | 2.50E-23  | 0.93 |
| 27916 | 32050  | 32657  | 5.85E-33  | 0.82 |
| 27916 | 32982  | 33447  | 8.30E-26  | 0.86 |
| 27916 | 33872  | 34286  | 1.14E-28  | 0.91 |
| 27916 | 37176  | 37825  | 2.14E-09  | 0.8  |
| 27916 | 41578  | 42777  | 1.32E-46  | 0.8  |
| 27916 | 45810  | 46798  | 1.11E-36  | 0.9  |
| 27916 | 57889  | 58427  | 7.00E-18  | 0.75 |
| 27916 | 69119  | 69693  | 4.36E-103 | 0.9  |
| 27916 | 93766  | 94299  | 2.40E-46  | 0.67 |
| 27917 | 26554  | 27157  | 8.45E-63  | 0.71 |
| 27917 | 27393  | 27832  | 2.02E-48  | 0.88 |
| 27917 | 28342  | 28737  | 4.28E-39  | 0.96 |
| 27918 | 24278  | 24631  | 5.16E-32  | 0.88 |
| 27921 | 8464   | 9300   | 2.85E-04  | 1    |
| 27921 | 54147  | 54411  | 1.63E-04  | 0.89 |
| 27934 | 15159  | 15983  | 5.09E-23  | 0.73 |
| 27934 | 50416  | 50929  | 2.21E-29  | 0.95 |
| 27934 | 59297  | 60156  | 1.59E-112 | 0.95 |
| 27934 | 61007  | 62454  | 9.18E-79  | 0.86 |
| 27934 | 77912  | 78649  | 5.97E-33  | 0.92 |
| 27934 | 85981  | 86536  | 2.95E-71  | 0.93 |
| 27934 | 93392  | 94334  | 3.33E-38  | 0.91 |
| 27934 | 98283  | 98670  | 1.10E-34  | 0.96 |
| 27934 | 106000 | 106662 | 1.67E-41  | 0.88 |
| 27934 | 107367 | 107901 | 4.15E-71  | 0.89 |
| 27934 | 112867 | 113102 | 2.73E-09  | 0.61 |



|       |        |        |           |      |
|-------|--------|--------|-----------|------|
| 27934 | 120670 | 120914 | 1.49E-08  | 0.81 |
| 27934 | 125029 | 125335 | 6.61E-12  | 0.76 |
| 27934 | 126290 | 126911 | 5.82E-23  | 0.81 |
| 27934 | 129705 | 130129 | 6.33E-74  | 0.93 |
| 27934 | 131188 | 131406 | 2.16E-28  | 0.85 |
| 27934 | 132009 | 132217 | 5.21E-18  | 0.86 |
| 27934 | 138191 | 139231 | 2.30E-47  | 0.87 |
| 27934 | 148509 | 149040 | 1.79E-06  | 0.84 |
| 27934 | 151009 | 151256 | 5.13E-05  | 0.95 |
| 27934 | 154764 | 155188 | 1.05E-12  | 0.92 |
| 27934 | 156801 | 157044 | 1.23E-21  | 0.86 |
| 27940 | 58851  | 59932  | 2.09E-26  | 0.69 |
| 27940 | 61557  | 62106  | 1.26E-18  | 0.8  |
| 27940 | 72196  | 72682  | 9.96E-23  | 0.84 |
| 27940 | 72659  | 73733  | 1.10E-36  | 0.82 |
| 27940 | 77210  | 78396  | 9.67E-34  | 0.73 |
| 27940 | 78605  | 79393  | 2.89E-18  | 0.76 |
| 27940 | 79706  | 80369  | 3.06E-32  | 0.87 |
| 27940 | 94362  | 94884  | 2.50E-26  | 0.79 |
| 27940 | 97684  | 98831  | 4.35E-41  | 0.75 |
| 27940 | 122203 | 122641 | 2.64E-42  | 0.88 |
| 27940 | 142515 | 142964 | 3.63E-20  | 0.65 |
| 27940 | 146009 | 146591 | 2.00E-19  | 0.7  |
| 27940 | 147197 | 147870 | 5.32E-77  | 0.88 |
| 27940 | 148099 | 148320 | 1.04E-29  | 0.94 |
| 27940 | 148693 | 149662 | 8.08E-130 | 0.9  |
| 27940 | 150539 | 152116 | 2.63E-125 | 0.9  |
| 27940 | 156038 | 156652 | 1.24E-32  | 0.72 |
| 27942 | 2989   | 3376   | 3.89E-25  | 0.77 |
| 27942 | 4092   | 4631   | 8.54E-26  | 0.91 |
| 27942 | 16422  | 16670  | 3.82E-15  | 0.65 |
| 27942 | 17403  | 17995  | 4.39E-25  | 0.61 |
| 27942 | 57745  | 58215  | 1.76E-48  | 0.88 |
| 27942 | 58583  | 60432  | 9.37E-95  | 0.82 |
| 27942 | 91772  | 92638  | 1.34E-42  | 0.88 |
| 27942 | 93749  | 93994  | 1.95E-14  | 0.76 |
| 27945 | 8108   | 9645   | 1.11E-86  | 0.87 |
| 27949 | 1520   | 2104   | 2.98E-14  | 0.91 |
| 27949 | 47557  | 47861  | 4.42E-08  | 0.93 |
| 27949 | 62866  | 63077  | 1.76E-12  | 0.84 |
| 27949 | 82121  | 82563  | 3.39E-05  | 1    |
| 27950 | 15753  | 16085  | 2.82E-09  | 0.88 |
| 27950 | 29009  | 29353  | 2.98E-27  | 0.9  |
| 27950 | 43416  | 43908  | 9.91E-06  | 0.97 |
| 27950 | 79477  | 79911  | 2.97E-11  | 0.8  |
| 27953 | 3237   | 3582   | 2.23E-15  | 0.8  |
| 27953 | 16374  | 16947  | 5.01E-10  | 0.75 |
| 27955 | 13602  | 14556  | 4.46E-106 | 0.84 |
| 27955 | 15722  | 16189  | 2.25E-41  | 0.88 |
| 27955 | 28493  | 28947  | 1.03E-22  | 0.82 |
| 27955 | 31544  | 31855  | 4.20E-26  | 0.85 |
| 27955 | 32471  | 33179  | 8.12E-54  | 0.61 |
| 27955 | 38237  | 38849  | 1.60E-27  | 0.79 |

|       |        |        |           |      |
|-------|--------|--------|-----------|------|
| 27955 | 59633  | 60120  | 4.82E-20  | 0.88 |
| 27955 | 65537  | 66116  | 1.12E-39  | 0.84 |
| 27955 | 72094  | 72683  | 1.48E-19  | 0.79 |
| 27955 | 112843 | 113137 | 4.21E-42  | 0.63 |
| 27956 | 19440  | 20980  | 3.37E-64  | 0.83 |
| 27956 | 77606  | 77865  | 5.09E-07  | 0.97 |
| 27956 | 122458 | 122724 | 5.96E-30  | 0.77 |
| 27956 | 145247 | 145741 | 2.67E-22  | 0.83 |
| 27956 | 146288 | 146884 | 5.57E-48  | 0.83 |
| 27956 | 147336 | 148518 | 8.76E-34  | 0.89 |
| 27956 | 159914 | 160735 | 2.31E-23  | 0.68 |
| 27956 | 161806 | 162435 | 6.53E-11  | 0.91 |
| 27956 | 183557 | 183807 | 1.98E-07  | 0.76 |
| 27958 | 7716   | 8043   | 5.18E-13  | 0.86 |
| 27958 | 14460  | 15335  | 9.28E-27  | 0.75 |
| 27961 | 16106  | 16416  | 4.79E-17  | 0.92 |
| 27961 | 22266  | 23604  | 2.38E-33  | 0.69 |
| 27961 | 23833  | 24188  | 1.18E-47  | 0.9  |
| 27961 | 34179  | 34381  | 1.29E-11  | 0.65 |
| 27961 | 89099  | 89728  | 3.28E-36  | 0.88 |
| 27961 | 94358  | 94872  | 1.54E-82  | 0.81 |
| 27963 | 1390   | 1884   | 1.62E-05  | 0.84 |
| 27964 | 16589  | 17359  | 4.93E-26  | 0.83 |
| 27964 | 47181  | 47534  | 2.32E-46  | 0.84 |
| 27964 | 47737  | 49065  | 1.50E-105 | 0.91 |
| 27964 | 49278  | 50058  | 3.28E-42  | 0.92 |
| 27964 | 50306  | 50678  | 4.06E-26  | 0.87 |
| 27964 | 50882  | 52138  | 1.43E-148 | 0.86 |
| 27964 | 75064  | 75387  | 2.27E-19  | 0.74 |
| 27964 | 97408  | 97621  | 1.11E-12  | 0.6  |
| 27964 | 97740  | 98077  | 2.87E-10  | 0.78 |
| 27964 | 122989 | 123474 | 1.29E-52  | 0.88 |
| 27964 | 123687 | 124358 | 1.09E-40  | 0.85 |
| 27964 | 166446 | 167117 | 1.19E-22  | 0.92 |
| 27964 | 186765 | 187011 | 1.11E-15  | 0.78 |
| 27965 | 7699   | 8449   | 6.08E-41  | 0.89 |
| 27965 | 9591   | 10022  | 1.66E-25  | 0.95 |
| 27965 | 15819  | 16792  | 2.06E-34  | 0.85 |
| 27965 | 22462  | 22696  | 5.30E-22  | 0.85 |
| 27965 | 22882  | 23529  | 1.80E-28  | 0.92 |
| 27965 | 52992  | 53326  | 2.02E-44  | 0.7  |
| 27965 | 54365  | 55050  | 1.57E-31  | 0.77 |
| 27966 | 3560   | 3869   | 4.50E-32  | 0.9  |
| 27966 | 8223   | 8518   | 2.42E-16  | 0.88 |
| 27966 | 14101  | 14413  | 6.59E-12  | 0.74 |
| 27966 | 20432  | 20722  | 3.21E-11  | 0.81 |
| 27967 | 25613  | 25869  | 1.35E-07  | 1    |
| 27967 | 26887  | 27239  | 5.12E-06  | 0.9  |
| 27968 | 6883   | 7101   | 2.54E-04  | 0.86 |
| 27968 | 45398  | 45754  | 6.93E-17  | 0.88 |
| 27968 | 92890  | 93272  | 5.31E-26  | 0.9  |
| 27968 | 93617  | 94026  | 1.07E-11  | 0.95 |
| 27968 | 98609  | 99941  | 2.21E-61  | 0.91 |

|       |        |        |          |      |
|-------|--------|--------|----------|------|
| 27968 | 100503 | 101179 | 4.18E-50 | 0.87 |
| 27970 | 5710   | 6423   | 3.59E-31 | 0.88 |
| 27970 | 7097   | 7721   | 9.81E-31 | 0.9  |
| 27970 | 20440  | 20974  | 5.64E-19 | 0.77 |
| 27970 | 22109  | 23240  | 2.49E-50 | 0.85 |
| 27970 | 23487  | 23968  | 1.35E-35 | 0.92 |
| 27970 | 24935  | 25172  | 9.09E-18 | 0.81 |
| 27970 | 27975  | 28648  | 5.15E-40 | 0.9  |
| 27972 | 17089  | 17328  | 9.64E-11 | 0.77 |
| 27973 | 271    | 1408   | 3.70E-42 | 0.77 |
| 27973 | 2236   | 2642   | 1.56E-09 | 0.75 |
| 27973 | 32000  | 32870  | 8.53E-38 | 0.64 |
| 27973 | 40118  | 40640  | 3.15E-32 | 0.94 |
| 27973 | 42284  | 42829  | 5.63E-59 | 0.88 |
| 27973 | 43880  | 44443  | 2.91E-29 | 0.9  |
| 27973 | 46595  | 47298  | 5.34E-30 | 0.73 |
| 27973 | 50044  | 50424  | 1.18E-15 | 0.85 |
| 27973 | 59960  | 60612  | 5.06E-38 | 0.93 |
| 27973 | 60911  | 61323  | 3.88E-57 | 0.94 |
| 27973 | 63900  | 64187  | 4.76E-29 | 0.82 |
| 27981 | 8707   | 9005   | 1.00E-25 | 0.66 |
| 27981 | 9217   | 9643   | 2.21E-20 | 0.73 |
| 27981 | 10081  | 10423  | 2.21E-48 | 0.93 |
| 27981 | 15386  | 15624  | 9.60E-53 | 0.96 |
| 27981 | 16693  | 16923  | 3.61E-18 | 0.9  |
| 27981 | 32658  | 33039  | 1.80E-06 | 0.7  |
| 27981 | 44598  | 45035  | 1.29E-35 | 0.89 |
| 27982 | 32410  | 33399  | 9.03E-35 | 0.95 |
| 27985 | 134727 | 135165 | 2.15E-06 | 0.96 |
| 27985 | 213180 | 214134 | 4.37E-75 | 0.87 |
| 27985 | 234099 | 234336 | 2.11E-13 | 0.66 |
| 27985 | 234605 | 235155 | 5.89E-38 | 0.82 |
| 27985 | 241162 | 241797 | 8.29E-64 | 0.92 |
| 27985 | 332044 | 333290 | 5.97E-38 | 0.79 |
| 27985 | 343045 | 343382 | 1.47E-43 | 0.89 |
| 27985 | 343676 | 344063 | 2.70E-75 | 0.9  |
| 27985 | 344408 | 344639 | 6.54E-23 | 0.8  |
| 27986 | 4338   | 4575   | 7.80E-11 | 0.75 |
| 27996 | 13960  | 14314  | 6.79E-32 | 0.82 |
| 27996 | 19993  | 21050  | 2.14E-47 | 0.87 |
| 27996 | 22292  | 22723  | 2.62E-19 | 0.83 |
| 27996 | 35226  | 36800  | 3.43E-65 | 0.85 |
| 27996 | 40751  | 41310  | 1.63E-18 | 0.81 |
| 27996 | 42396  | 43186  | 1.44E-31 | 0.87 |
| 27996 | 51781  | 52153  | 2.81E-10 | 0.82 |
| 27996 | 56740  | 57521  | 2.70E-42 | 0.68 |
| 27996 | 57743  | 58314  | 3.57E-17 | 0.83 |
| 27996 | 58547  | 59921  | 1.34E-73 | 0.86 |
| 27999 | 10717  | 10928  | 1.79E-16 | 0.83 |
| 27999 | 15269  | 15733  | 5.44E-15 | 0.78 |
| 27999 | 27590  | 27893  | 4.63E-25 | 0.71 |
| 27999 | 29039  | 29319  | 1.39E-10 | 0.67 |
| 28004 | 2039   | 2497   | 8.91E-31 | 0.9  |

|       |        |        |           |      |
|-------|--------|--------|-----------|------|
| 28005 | 13482  | 13763  | 2.76E-23  | 0.75 |
| 28005 | 14008  | 15327  | 3.62E-40  | 0.84 |
| 28007 | 31497  | 31980  | 1.84E-28  | 0.88 |
| 28007 | 39171  | 40607  | 1.07E-68  | 0.9  |
| 28007 | 41381  | 42314  | 1.63E-73  | 0.88 |
| 28007 | 49964  | 50421  | 1.93E-26  | 0.9  |
| 28007 | 51312  | 51894  | 2.03E-56  | 0.81 |
| 28007 | 62916  | 63375  | 8.85E-09  | 0.66 |
| 28007 | 67898  | 68266  | 1.54E-21  | 0.83 |
| 28007 | 76850  | 78986  | 4.27E-59  | 0.82 |
| 28007 | 79541  | 79872  | 5.05E-18  | 0.87 |
| 28007 | 80308  | 80702  | 1.93E-20  | 0.84 |
| 28007 | 81152  | 81617  | 4.32E-17  | 0.84 |
| 28007 | 94648  | 95473  | 7.56E-53  | 0.91 |
| 28007 | 95694  | 96545  | 6.60E-55  | 0.93 |
| 28007 | 97400  | 97865  | 1.16E-55  | 0.94 |
| 28007 | 98930  | 99338  | 6.26E-23  | 0.93 |
| 28008 | 14137  | 14566  | 1.36E-40  | 0.96 |
| 28008 | 15228  | 15550  | 1.81E-24  | 0.72 |
| 28011 | 8176   | 9171   | 3.44E-43  | 0.77 |
| 28011 | 24489  | 25364  | 2.29E-46  | 0.82 |
| 28011 | 27520  | 29259  | 5.85E-132 | 0.86 |
| 28011 | 30321  | 30649  | 3.25E-33  | 0.99 |
| 28011 | 31428  | 31629  | 3.30E-36  | 0.9  |
| 28012 | 9069   | 9295   | 1.11E-08  | 0.88 |
| 28012 | 16386  | 16623  | 7.43E-07  | 0.89 |
| 28012 | 26499  | 26795  | 2.21E-04  | 1    |
| 28014 | 29553  | 30591  | 2.16E-31  | 0.6  |
| 28016 | 25764  | 26544  | 1.19E-20  | 0.78 |
| 28021 | 1063   | 1463   | 4.40E-05  | 0.88 |
| 28024 | 29899  | 30428  | 1.90E-10  | 0.88 |
| 28024 | 52884  | 53461  | 1.60E-11  | 0.95 |
| 28024 | 53498  | 53740  | 5.25E-07  | 0.82 |
| 28024 | 104968 | 105320 | 1.03E-05  | 1    |
| 28024 | 120295 | 120869 | 5.61E-08  | 0.8  |
| 28024 | 161430 | 161806 | 7.38E-06  | 0.84 |
| 28024 | 173890 | 174188 | 8.70E-04  | 0.86 |
| 28025 | 4711   | 5098   | 1.70E-07  | 0.92 |
| 28025 | 9556   | 9888   | 2.72E-05  | 0.87 |
| 28030 | 1861   | 2670   | 5.55E-24  | 0.73 |
| 28035 | 6445   | 7100   | 1.97E-44  | 0.91 |
| 28035 | 23081  | 23332  | 1.11E-17  | 0.81 |
| 28035 | 27140  | 27882  | 1.71E-41  | 0.84 |
| 28035 | 28216  | 28743  | 1.11E-18  | 0.83 |
| 28035 | 30390  | 30643  | 1.22E-34  | 0.85 |
| 28035 | 30846  | 31815  | 3.41E-95  | 0.83 |
| 28035 | 34286  | 34929  | 2.29E-47  | 0.92 |
| 28035 | 36420  | 36749  | 4.69E-15  | 0.85 |
| 28035 | 38205  | 38543  | 7.01E-15  | 0.83 |
| 28035 | 38658  | 39628  | 3.33E-35  | 0.86 |
| 28035 | 39836  | 40180  | 2.68E-41  | 0.89 |
| 28035 | 43944  | 44451  | 9.08E-17  | 0.86 |
| 28035 | 44659  | 44973  | 1.83E-12  | 0.79 |

|       |        |        |           |      |
|-------|--------|--------|-----------|------|
| 28035 | 46245  | 46535  | 4.03E-30  | 0.94 |
| 28035 | 46742  | 47066  | 5.89E-29  | 0.96 |
| 28035 | 51897  | 52563  | 1.84E-31  | 0.89 |
| 28035 | 65287  | 66215  | 1.72E-50  | 0.86 |
| 28035 | 80421  | 80622  | 2.96E-04  | 0.89 |
| 28035 | 121193 | 121569 | 5.43E-20  | 0.93 |
| 28035 | 124291 | 125732 | 8.31E-120 | 0.92 |
| 28035 | 127078 | 127848 | 1.71E-49  | 0.95 |
| 28035 | 128064 | 128948 | 3.18E-52  | 0.91 |
| 28035 | 130758 | 131794 | 1.57E-61  | 0.89 |
| 28035 | 134261 | 134693 | 2.66E-11  | 0.78 |
| 28035 | 135051 | 135386 | 2.84E-24  | 0.92 |
| 28035 | 147810 | 148219 | 8.95E-39  | 0.86 |
| 28035 | 153401 | 153779 | 1.59E-15  | 0.96 |
| 28035 | 155197 | 156227 | 4.55E-74  | 0.93 |
| 28035 | 156461 | 156745 | 1.04E-50  | 0.95 |
| 28035 | 158204 | 158576 | 8.56E-47  | 0.88 |
| 28035 | 159624 | 160545 | 6.88E-42  | 0.73 |
| 28035 | 197067 | 197425 | 4.66E-22  | 0.79 |
| 28035 | 245625 | 245936 | 1.17E-20  | 0.89 |
| 28035 | 265230 | 265544 | 8.34E-09  | 0.66 |
| 28035 | 275680 | 276035 | 1.40E-34  | 0.7  |
| 28037 | 4588   | 5600   | 6.84E-60  | 0.97 |
| 28037 | 14217  | 14710  | 1.22E-20  | 0.94 |
| 28037 | 15779  | 16245  | 2.57E-28  | 0.96 |
| 28037 | 25462  | 26031  | 1.54E-63  | 0.79 |
| 28037 | 26281  | 26642  | 5.84E-55  | 0.86 |
| 28037 | 47471  | 47926  | 7.43E-11  | 0.81 |
| 28038 | 5350   | 5805   | 8.43E-05  | 0.85 |
| 28040 | 38038  | 38467  | 2.80E-28  | 0.92 |
| 28040 | 39140  | 39508  | 2.68E-20  | 0.95 |
| 28040 | 40852  | 41122  | 1.19E-20  | 0.89 |
| 28040 | 41518  | 41903  | 3.26E-38  | 0.95 |
| 28040 | 42264  | 42993  | 1.00E-58  | 0.95 |
| 28040 | 44664  | 45269  | 1.82E-15  | 0.83 |
| 28042 | 7403   | 7674   | 1.96E-10  | 0.88 |
| 28047 | 2483   | 2877   | 7.14E-30  | 0.94 |
| 28047 | 9866   | 10122  | 1.30E-09  | 0.87 |
| 28049 | 37793  | 38176  | 2.37E-30  | 0.86 |
| 28049 | 70715  | 71663  | 4.41E-24  | 0.8  |
| 28049 | 72028  | 72538  | 4.64E-17  | 0.8  |
| 28049 | 77529  | 78877  | 4.62E-109 | 0.89 |
| 28049 | 79123  | 79539  | 1.04E-31  | 0.93 |
| 28049 | 85787  | 86582  | 1.23E-49  | 0.71 |
| 28049 | 89569  | 90442  | 7.83E-35  | 0.62 |
| 28049 | 97317  | 97588  | 5.36E-13  | 0.84 |
| 28049 | 98250  | 98692  | 6.63E-26  | 0.81 |
| 28052 | 37932  | 38164  | 7.66E-05  | 0.77 |
| 28053 | 15323  | 15707  | 3.11E-26  | 0.96 |
| 28053 | 15920  | 16259  | 5.27E-31  | 0.95 |
| 28053 | 16516  | 17672  | 4.02E-98  | 0.92 |
| 28054 | 14640  | 14943  | 9.33E-04  | 1    |
| 28059 | 22717  | 23013  | 1.21E-05  | 0.79 |

|       |        |        |           |      |
|-------|--------|--------|-----------|------|
| 28059 | 24684  | 24998  | 9.87E-10  | 0.78 |
| 28060 | 7454   | 8236   | 5.97E-31  | 0.72 |
| 28060 | 9971   | 10279  | 2.82E-22  | 0.91 |
| 28060 | 16969  | 17592  | 4.34E-28  | 0.81 |
| 28060 | 17921  | 18168  | 9.76E-17  | 0.8  |
| 28063 | 1087   | 1302   | 9.24E-06  | 0.88 |
| 28067 | 11892  | 12567  | 7.70E-18  | 0.8  |
| 28067 | 13722  | 14533  | 2.96E-36  | 0.84 |
| 28067 | 15099  | 15397  | 2.24E-11  | 0.79 |
| 28067 | 15664  | 16253  | 5.26E-29  | 0.86 |
| 28067 | 16510  | 17073  | 2.95E-34  | 0.81 |
| 28067 | 31260  | 31520  | 2.03E-06  | 0.66 |
| 28067 | 43551  | 45086  | 1.64E-92  | 0.79 |
| 28067 | 48463  | 48807  | 7.39E-84  | 0.96 |
| 28067 | 49008  | 49353  | 4.40E-37  | 0.94 |
| 28067 | 49736  | 50339  | 1.06E-40  | 0.66 |
| 28070 | 9140   | 9418   | 7.41E-17  | 0.92 |
| 28074 | 13621  | 13951  | 2.44E-07  | 0.8  |
| 28074 | 24946  | 25233  | 6.63E-06  | 0.95 |
| 28076 | 29405  | 30947  | 4.14E-42  | 0.67 |
| 28076 | 36996  | 37787  | 6.13E-24  | 0.77 |
| 28076 | 39651  | 40904  | 7.60E-73  | 0.76 |
| 28076 | 63255  | 64674  | 3.16E-50  | 0.81 |
| 28076 | 71498  | 72097  | 1.30E-37  | 0.69 |
| 28076 | 75990  | 76275  | 6.07E-48  | 0.94 |
| 28076 | 88185  | 88642  | 1.11E-19  | 0.81 |
| 28076 | 90263  | 90987  | 7.02E-49  | 0.92 |
| 28076 | 91238  | 91654  | 1.20E-24  | 0.85 |
| 28076 | 95012  | 96441  | 2.01E-58  | 0.61 |
| 28076 | 113733 | 115817 | 7.95E-104 | 0.72 |
| 28076 | 126370 | 126857 | 4.81E-29  | 0.81 |
| 28076 | 127175 | 127458 | 2.65E-31  | 0.93 |
| 28076 | 128912 | 129234 | 2.16E-38  | 0.93 |
| 28076 | 129845 | 130104 | 1.38E-14  | 0.92 |
| 28076 | 131239 | 131545 | 4.88E-43  | 0.85 |
| 28076 | 142727 | 143162 | 1.93E-20  | 0.84 |
| 28076 | 144012 | 144364 | 6.20E-16  | 0.81 |
| 28076 | 155781 | 156215 | 2.06E-13  | 0.83 |
| 28077 | 15018  | 16118  | 1.53E-43  | 0.72 |
| 28077 | 19353  | 20170  | 7.55E-50  | 0.86 |
| 28077 | 29784  | 30168  | 1.73E-25  | 0.91 |
| 28077 | 42948  | 43394  | 9.70E-09  | 0.69 |
| 28092 | 6485   | 6740   | 4.77E-20  | 0.67 |
| 28092 | 30950  | 31296  | 5.89E-11  | 0.75 |
| 28092 | 53653  | 54039  | 1.61E-42  | 0.73 |
| 28093 | 49956  | 51136  | 1.56E-89  | 0.89 |
| 28093 | 65700  | 65987  | 3.87E-21  | 0.92 |
| 28093 | 66392  | 66678  | 4.11E-14  | 0.89 |
| 28093 | 68805  | 69085  | 5.09E-31  | 0.89 |
| 28094 | 4285   | 4775   | 1.67E-18  | 0.74 |
| 28094 | 5927   | 6782   | 5.11E-88  | 0.96 |
| 28094 | 19891  | 20181  | 1.89E-20  | 0.79 |
| 28094 | 20196  | 20579  | 9.19E-20  | 0.84 |

|       |        |        |           |      |
|-------|--------|--------|-----------|------|
| 28094 | 21264  | 21728  | 1.62E-16  | 0.82 |
| 28094 | 26276  | 26728  | 9.47E-10  | 0.88 |
| 28094 | 41551  | 41999  | 3.77E-11  | 0.95 |
| 28094 | 44234  | 44712  | 1.13E-52  | 0.89 |
| 28094 | 45722  | 46123  | 3.49E-33  | 0.8  |
| 28094 | 56050  | 56435  | 1.20E-32  | 0.88 |
| 28094 | 60333  | 61130  | 3.24E-39  | 0.81 |
| 28094 | 62226  | 62930  | 7.51E-52  | 0.93 |
| 28094 | 96788  | 97179  | 8.48E-34  | 0.89 |
| 28095 | 2487   | 3419   | 6.45E-68  | 0.9  |
| 28097 | 13025  | 13399  | 3.34E-63  | 0.82 |
| 28097 | 16426  | 16951  | 3.07E-60  | 0.79 |
| 28097 | 17191  | 17400  | 2.58E-31  | 0.95 |
| 28097 | 18407  | 19216  | 2.38E-65  | 0.93 |
| 28097 | 19500  | 19829  | 2.42E-44  | 0.95 |
| 28097 | 20636  | 20997  | 1.35E-23  | 0.89 |
| 28097 | 26648  | 26994  | 2.38E-15  | 0.8  |
| 28097 | 27632  | 28796  | 1.06E-53  | 0.82 |
| 28097 | 30180  | 30470  | 4.71E-13  | 0.68 |
| 28097 | 32253  | 32941  | 1.51E-99  | 0.97 |
| 28097 | 34662  | 35006  | 1.48E-18  | 0.7  |
| 28097 | 35922  | 36323  | 3.68E-14  | 0.77 |
| 28098 | 15198  | 15495  | 2.10E-61  | 0.88 |
| 28098 | 27552  | 28070  | 2.87E-25  | 0.79 |
| 28098 | 28283  | 29309  | 5.59E-66  | 0.88 |
| 28098 | 29518  | 30114  | 9.45E-29  | 0.85 |
| 28098 | 40579  | 41110  | 2.96E-15  | 0.67 |
| 28098 | 43663  | 44125  | 4.73E-10  | 0.75 |
| 28098 | 48195  | 48453  | 3.77E-30  | 0.88 |
| 28098 | 48761  | 50439  | 1.76E-55  | 0.73 |
| 28100 | 538    | 2171   | 2.54E-108 | 0.87 |
| 28102 | 5008   | 5665   | 1.83E-48  | 0.68 |
| 28102 | 78026  | 78315  | 7.09E-21  | 0.65 |
| 28102 | 81361  | 81725  | 1.83E-52  | 0.93 |
| 28102 | 116191 | 116678 | 6.17E-21  | 0.64 |
| 28102 | 117394 | 117689 | 8.28E-24  | 0.98 |
| 28102 | 119160 | 119731 | 1.00E-51  | 0.96 |
| 28104 | 3578   | 3843   | 9.80E-42  | 0.78 |
| 28104 | 4410   | 4889   | 1.43E-37  | 0.75 |
| 28104 | 16812  | 17413  | 5.07E-42  | 0.7  |
| 28107 | 699    | 990    | 6.68E-04  | 0.96 |
| 28108 | 63348  | 64930  | 6.69E-86  | 0.89 |
| 28108 | 67796  | 68987  | 4.81E-40  | 0.78 |
| 28108 | 105644 | 106096 | 8.87E-23  | 0.88 |
| 28108 | 126337 | 126914 | 1.19E-18  | 0.83 |
| 28111 | 31025  | 32027  | 1.63E-49  | 0.78 |
| 28111 | 246349 | 246581 | 2.52E-13  | 0.8  |
| 28111 | 260639 | 260843 | 1.38E-07  | 0.91 |
| 28111 | 274683 | 274987 | 7.27E-06  | 0.81 |
| 28111 | 296323 | 296675 | 2.77E-06  | 0.9  |
| 28111 | 327522 | 327993 | 4.58E-09  | 0.79 |
| 28111 | 333034 | 333268 | 1.52E-12  | 0.89 |
| 28118 | 35513  | 35882  | 4.30E-25  | 0.86 |

|       |        |        |           |      |
|-------|--------|--------|-----------|------|
| 28118 | 36429  | 38019  | 1.75E-64  | 0.92 |
| 28118 | 38721  | 39396  | 8.72E-39  | 0.97 |
| 28118 | 39899  | 40117  | 2.92E-21  | 0.94 |
| 28118 | 40592  | 40936  | 1.53E-26  | 0.91 |
| 28122 | 20511  | 20781  | 1.80E-09  | 0.96 |
| 28124 | 37265  | 37925  | 5.27E-18  | 0.8  |
| 28124 | 47461  | 48928  | 1.33E-55  | 0.67 |
| 28124 | 51884  | 52410  | 7.07E-32  | 0.83 |
| 28124 | 71758  | 71976  | 1.78E-15  | 0.82 |
| 28127 | 1220   | 1592   | 1.79E-06  | 0.84 |
| 28128 | 21095  | 21492  | 5.07E-34  | 0.98 |
| 28128 | 22024  | 22368  | 1.04E-16  | 0.9  |
| 28128 | 23010  | 23520  | 1.22E-13  | 0.83 |
| 28128 | 27167  | 27433  | 1.00E-10  | 0.69 |
| 28128 | 38733  | 39600  | 1.01E-40  | 0.88 |
| 28128 | 42637  | 43073  | 4.79E-21  | 0.78 |
| 28128 | 49853  | 50197  | 8.11E-31  | 0.88 |
| 28128 | 61760  | 61966  | 1.31E-19  | 0.92 |
| 28128 | 77021  | 77900  | 4.05E-66  | 0.79 |
| 28128 | 87186  | 88122  | 2.51E-111 | 0.88 |
| 28129 | 6378   | 6752   | 2.01E-06  | 0.8  |
| 28134 | 11092  | 11427  | 1.99E-10  | 0.75 |
| 28134 | 22261  | 23595  | 1.34E-35  | 0.61 |
| 28134 | 30498  | 31074  | 1.69E-32  | 0.89 |
| 28134 | 31345  | 31599  | 3.30E-46  | 0.84 |
| 28134 | 37971  | 38676  | 9.94E-38  | 0.82 |
| 28134 | 39344  | 39648  | 1.37E-71  | 0.95 |
| 28134 | 43016  | 43298  | 5.01E-29  | 0.94 |
| 28134 | 49932  | 50475  | 2.50E-16  | 0.65 |
| 28134 | 50717  | 51181  | 7.16E-33  | 0.88 |
| 28134 | 63306  | 63894  | 9.82E-21  | 0.83 |
| 28134 | 66000  | 66831  | 1.78E-46  | 0.89 |
| 28134 | 105219 | 106194 | 5.07E-42  | 0.88 |
| 28135 | 898    | 1570   | 2.97E-06  | 0.81 |
| 28138 | 29245  | 29494  | 3.52E-09  | 0.87 |
| 28138 | 58139  | 58475  | 2.11E-13  | 0.87 |
| 28138 | 67834  | 68692  | 9.05E-15  | 0.71 |
| 28138 | 89207  | 89796  | 2.67E-15  | 0.82 |
| 28139 | 8070   | 8346   | 3.48E-07  | 0.62 |
| 28140 | 29159  | 29532  | 2.26E-38  | 0.92 |
| 28140 | 35954  | 36246  | 1.36E-13  | 0.84 |
| 28140 | 38458  | 38970  | 1.13E-21  | 0.8  |
| 28140 | 39558  | 42493  | 1.33E-103 | 0.87 |
| 28140 | 47384  | 47585  | 7.55E-40  | 0.9  |
| 28140 | 47820  | 48170  | 2.02E-25  | 0.75 |
| 28140 | 48386  | 48815  | 1.00E-25  | 0.84 |
| 28141 | 3330   | 3631   | 2.39E-10  | 0.66 |
| 28143 | 17657  | 18281  | 3.28E-08  | 0.83 |
| 28143 | 49138  | 49356  | 3.25E-06  | 0.78 |
| 28143 | 65528  | 66080  | 1.01E-19  | 0.91 |
| 28143 | 110816 | 111022 | 2.33E-06  | 0.86 |
| 28147 | 6208   | 6453   | 1.62E-10  | 0.83 |
| 28147 | 35140  | 36072  | 4.82E-28  | 0.78 |



|       |        |        |           |      |
|-------|--------|--------|-----------|------|
| 28147 | 41006  | 41242  | 9.93E-12  | 0.82 |
| 28151 | 5651   | 6258   | 9.52E-48  | 0.81 |
| 28151 | 6585   | 6843   | 1.11E-10  | 0.76 |
| 28151 | 11662  | 12618  | 6.68E-56  | 0.94 |
| 28152 | 12489  | 12808  | 1.93E-12  | 0.87 |
| 28152 | 22984  | 23790  | 2.54E-14  | 0.76 |
| 28152 | 25615  | 26270  | 2.97E-33  | 0.6  |
| 28152 | 30427  | 31141  | 4.68E-43  | 0.93 |
| 28152 | 44880  | 46262  | 7.11E-50  | 0.85 |
| 28152 | 50077  | 50429  | 4.90E-20  | 0.8  |
| 28152 | 56693  | 57260  | 8.18E-32  | 0.89 |
| 28152 | 68902  | 69146  | 1.49E-33  | 0.82 |
| 28152 | 85622  | 85959  | 5.89E-25  | 0.93 |
| 28152 | 86174  | 86462  | 3.87E-38  | 0.9  |
| 28152 | 87856  | 88168  | 2.66E-22  | 0.7  |
| 28152 | 91223  | 91544  | 4.26E-14  | 0.8  |
| 28152 | 93308  | 94715  | 7.32E-52  | 0.73 |
| 28152 | 105731 | 106398 | 3.32E-54  | 0.83 |
| 28152 | 114884 | 115108 | 3.18E-29  | 0.88 |
| 28152 | 116110 | 116875 | 3.64E-41  | 0.67 |
| 28152 | 117109 | 117470 | 8.40E-34  | 0.88 |
| 28152 | 150990 | 151276 | 5.40E-16  | 0.82 |
| 28152 | 163561 | 163781 | 1.80E-17  | 0.82 |
| 28152 | 174375 | 174976 | 8.53E-44  | 0.88 |
| 28152 | 187912 | 188785 | 2.76E-43  | 0.8  |
| 28152 | 188993 | 189649 | 3.10E-23  | 0.74 |
| 28152 | 196220 | 196636 | 3.39E-18  | 0.76 |
| 28152 | 208828 | 209469 | 3.48E-30  | 0.62 |
| 28152 | 216602 | 217271 | 1.19E-38  | 0.82 |
| 28152 | 217920 | 219324 | 4.34E-85  | 0.8  |
| 28152 | 244241 | 244633 | 1.20E-17  | 0.72 |
| 28152 | 246097 | 247185 | 9.57E-105 | 0.94 |
| 28152 | 247817 | 248428 | 3.58E-35  | 0.86 |
| 28152 | 248693 | 249836 | 2.09E-52  | 0.89 |
| 28152 | 296134 | 296814 | 2.75E-12  | 0.74 |
| 28152 | 303986 | 304858 | 7.37E-28  | 0.78 |
| 28152 | 305124 | 305368 | 2.05E-17  | 0.8  |
| 28152 | 305570 | 306077 | 1.37E-14  | 0.82 |
| 28152 | 306292 | 306532 | 2.50E-23  | 0.91 |
| 28153 | 2133   | 2606   | 7.91E-26  | 0.65 |
| 28153 | 30683  | 31349  | 3.09E-29  | 0.65 |
| 28153 | 35260  | 36054  | 1.16E-32  | 0.6  |
| 28153 | 37124  | 37363  | 1.51E-10  | 0.81 |
| 28153 | 42177  | 42735  | 6.19E-16  | 0.82 |
| 28153 | 44244  | 44546  | 3.55E-16  | 0.81 |
| 28153 | 53430  | 54661  | 2.15E-59  | 0.88 |
| 28153 | 56923  | 59598  | 2.55E-105 | 0.82 |
| 28153 | 63729  | 64364  | 2.38E-13  | 0.89 |
| 28153 | 65615  | 66294  | 4.89E-19  | 0.82 |
| 28153 | 67724  | 68076  | 4.06E-23  | 0.93 |
| 28153 | 86887  | 87527  | 9.41E-33  | 0.81 |
| 28153 | 90128  | 90643  | 2.84E-23  | 0.65 |
| 28154 | 6953   | 7164   | 1.62E-10  | 0.79 |

|       |        |        |          |      |
|-------|--------|--------|----------|------|
| 28154 | 10738  | 11310  | 1.40E-75 | 0.88 |
| 28154 | 14807  | 15013  | 9.76E-06 | 0.63 |
| 28159 | 9489   | 10420  | 4.90E-47 | 0.9  |
| 28159 | 12762  | 13004  | 1.02E-11 | 0.77 |
| 28162 | 12698  | 13631  | 6.46E-53 | 0.84 |
| 28162 | 24691  | 25125  | 5.79E-14 | 0.6  |
| 28162 | 39407  | 39779  | 1.76E-70 | 0.86 |
| 28162 | 39989  | 40401  | 2.82E-27 | 0.85 |
| 28162 | 49549  | 50350  | 3.89E-70 | 0.9  |
| 28162 | 62596  | 63101  | 8.46E-32 | 0.84 |
| 28162 | 75904  | 76439  | 2.64E-13 | 0.68 |
| 28163 | 6202   | 7162   | 4.37E-27 | 0.71 |
| 28164 | 20921  | 21828  | 2.02E-65 | 0.89 |
| 28165 | 14165  | 14429  | 2.27E-13 | 0.88 |
| 28165 | 20947  | 21309  | 1.48E-12 | 0.96 |
| 28166 | 2297   | 3142   | 7.99E-17 | 0.8  |
| 28166 | 5419   | 6591   | 5.47E-97 | 0.67 |
| 28166 | 8599   | 8897   | 1.41E-22 | 0.96 |
| 28166 | 23844  | 24472  | 1.44E-28 | 0.72 |
| 28166 | 41627  | 41972  | 1.31E-22 | 0.84 |
| 28166 | 54967  | 55292  | 3.72E-23 | 0.9  |
| 28166 | 120758 | 122040 | 1.25E-62 | 0.82 |
| 28166 | 122731 | 123286 | 4.35E-21 | 0.76 |
| 28166 | 139683 | 139906 | 1.41E-13 | 0.8  |
| 28166 | 157134 | 157680 | 2.19E-56 | 0.83 |
| 28166 | 171188 | 171958 | 2.61E-36 | 0.62 |
| 28166 | 188989 | 189916 | 3.67E-68 | 0.85 |
| 28166 | 192496 | 192998 | 1.12E-11 | 0.81 |
| 28166 | 203403 | 203929 | 1.62E-10 | 0.6  |
| 28166 | 207871 | 208416 | 6.91E-17 | 0.85 |
| 28166 | 209592 | 209824 | 2.36E-27 | 0.89 |
| 28166 | 211117 | 212130 | 2.59E-34 | 0.82 |
| 28166 | 217923 | 218451 | 8.18E-26 | 0.94 |
| 28166 | 218718 | 218949 | 1.72E-24 | 0.96 |
| 28166 | 232895 | 234171 | 6.60E-81 | 0.88 |
| 28166 | 234381 | 235194 | 8.12E-21 | 0.77 |
| 28166 | 235638 | 236077 | 1.01E-19 | 0.91 |
| 28166 | 236313 | 236675 | 9.15E-20 | 0.93 |
| 28166 | 239170 | 240328 | 1.89E-59 | 0.84 |
| 28166 | 258901 | 259112 | 6.66E-23 | 0.78 |
| 28166 | 260076 | 260507 | 2.34E-22 | 0.86 |
| 28166 | 265044 | 266008 | 1.31E-49 | 0.93 |
| 28166 | 267866 | 268110 | 2.90E-24 | 0.75 |
| 28166 | 292770 | 293075 | 4.38E-11 | 0.79 |
| 28166 | 386193 | 386586 | 8.08E-22 | 0.91 |
| 28166 | 437615 | 437998 | 6.31E-38 | 0.94 |
| 28166 | 451988 | 452325 | 4.55E-14 | 0.69 |
| 28166 | 465391 | 465735 | 4.78E-09 | 0.76 |
| 28166 | 468835 | 470164 | 1.91E-52 | 0.68 |
| 28166 | 470675 | 471187 | 1.39E-14 | 0.78 |
| 28166 | 471630 | 472487 | 1.43E-20 | 0.81 |
| 28166 | 489949 | 490531 | 3.01E-10 | 0.8  |
| 28166 | 493939 | 494660 | 4.20E-70 | 0.91 |

|       |        |        |           |      |
|-------|--------|--------|-----------|------|
| 28166 | 509306 | 509951 | 1.94E-99  | 0.72 |
| 28166 | 510166 | 510524 | 1.37E-19  | 0.88 |
| 28166 | 510764 | 511088 | 1.81E-34  | 0.84 |
| 28166 | 515099 | 515693 | 1.11E-17  | 0.62 |
| 28166 | 531673 | 533547 | 5.05E-173 | 0.7  |
| 28166 | 546756 | 547200 | 3.32E-08  | 0.64 |
| 28166 | 549052 | 549612 | 8.53E-27  | 0.81 |
| 28166 | 577258 | 577846 | 1.48E-27  | 0.83 |
| 28166 | 596666 | 596897 | 2.87E-09  | 0.72 |
| 28169 | 9122   | 10033  | 9.69E-31  | 0.84 |
| 28169 | 10334  | 11120  | 2.54E-51  | 0.71 |
| 28170 | 310    | 744    | 3.53E-08  | 0.81 |
| 28173 | 5170   | 6096   | 1.49E-43  | 0.64 |
| 28173 | 7035   | 8144   | 8.52E-57  | 0.78 |
| 28173 | 9750   | 10740  | 9.75E-46  | 0.75 |
| 28176 | 6073   | 6333   | 8.73E-40  | 0.69 |
| 28176 | 6611   | 7037   | 8.45E-38  | 0.87 |
| 28176 | 7795   | 9536   | 6.57E-100 | 0.93 |
| 28176 | 9742   | 10336  | 8.66E-33  | 0.89 |
| 28176 | 18497  | 18939  | 5.40E-22  | 0.82 |
| 28176 | 19514  | 19774  | 6.47E-23  | 0.72 |
| 28176 | 25438  | 26918  | 4.03E-76  | 0.88 |
| 28176 | 31730  | 32003  | 1.05E-23  | 0.76 |
| 28176 | 36475  | 36845  | 8.79E-38  | 0.9  |
| 28176 | 37761  | 38241  | 1.24E-12  | 0.82 |
| 28176 | 38683  | 39433  | 6.31E-18  | 0.75 |
| 28176 | 56147  | 58503  | 6.30E-78  | 0.78 |
| 28176 | 58919  | 59721  | 3.41E-70  | 0.95 |
| 28176 | 59974  | 60690  | 7.72E-44  | 0.61 |
| 28176 | 70519  | 70934  | 6.89E-05  | 0.9  |
| 28176 | 72364  | 72953  | 2.25E-21  | 0.83 |
| 28176 | 74301  | 74898  | 6.30E-13  | 0.78 |
| 28176 | 75327  | 75844  | 1.28E-21  | 0.84 |
| 28176 | 76075  | 76373  | 4.85E-24  | 0.79 |
| 28176 | 77772  | 78020  | 1.70E-21  | 0.88 |
| 28176 | 80943  | 81180  | 9.29E-38  | 0.91 |
| 28176 | 81538  | 81934  | 4.88E-47  | 0.72 |
| 28179 | 6762   | 7060   | 4.54E-08  | 0.78 |
| 28179 | 30472  | 30690  | 1.10E-10  | 0.85 |
| 28179 | 55749  | 56211  | 5.73E-12  | 0.73 |
| 28179 | 58216  | 58572  | 2.74E-37  | 0.9  |
| 28179 | 91282  | 91865  | 1.20E-23  | 0.86 |
| 28179 | 115394 | 115970 | 1.81E-39  | 0.86 |
| 28179 | 136457 | 137302 | 7.16E-51  | 0.81 |
| 28179 | 148336 | 148714 | 1.79E-18  | 0.88 |
| 28179 | 169784 | 170630 | 3.41E-30  | 0.78 |
| 28179 | 184046 | 184635 | 6.53E-47  | 0.86 |
| 28179 | 192308 | 192757 | 2.49E-39  | 0.91 |
| 28179 | 201879 | 202240 | 3.36E-38  | 0.93 |
| 28179 | 210372 | 210649 | 9.18E-22  | 0.96 |
| 28180 | 1135   | 1903   | 3.03E-22  | 0.82 |
| 28180 | 6048   | 6379   | 6.12E-21  | 0.87 |
| 28180 | 11020  | 11527  | 7.55E-13  | 0.68 |

|       |        |        |          |      |
|-------|--------|--------|----------|------|
| 28180 | 26098  | 26440  | 9.50E-10 | 0.73 |
| 28180 | 80639  | 81308  | 2.30E-51 | 0.85 |
| 28180 | 85897  | 86246  | 3.69E-46 | 0.93 |
| 28180 | 87690  | 87979  | 6.43E-31 | 0.84 |
| 28180 | 91609  | 92007  | 5.72E-23 | 0.69 |
| 28180 | 125221 | 125437 | 1.74E-24 | 0.8  |
| 28186 | 15511  | 15755  | 4.65E-21 | 0.86 |
| 28186 | 19578  | 19928  | 6.34E-06 | 0.74 |
| 28191 | 81     | 318    | 6.43E-22 | 0.7  |
| 28192 | 472    | 796    | 1.14E-09 | 0.73 |
| 28192 | 22165  | 22454  | 1.18E-11 | 0.95 |
| 28192 | 44366  | 44844  | 2.43E-39 | 0.91 |
| 28192 | 49854  | 50158  | 1.07E-26 | 0.76 |
| 28192 | 66109  | 66583  | 1.94E-12 | 0.69 |
| 28193 | 5392   | 6091   | 1.52E-43 | 0.91 |
| 28193 | 6896   | 7241   | 1.06E-21 | 0.92 |
| 28193 | 60623  | 61820  | 1.59E-77 | 0.91 |
| 28193 | 67994  | 68659  | 7.27E-28 | 0.78 |
| 28193 | 79781  | 80334  | 5.09E-16 | 0.78 |
| 28193 | 80818  | 81486  | 2.68E-28 | 0.81 |
| 28193 | 112974 | 113434 | 9.15E-14 | 0.75 |
| 28193 | 114216 | 114803 | 9.57E-50 | 0.89 |
| 28196 | 8590   | 10513  | 1.05E-78 | 0.73 |
| 28196 | 26024  | 26406  | 2.94E-31 | 0.76 |
| 28196 | 40188  | 40393  | 1.90E-09 | 0.79 |
| 28196 | 43395  | 43625  | 5.05E-18 | 0.66 |
| 28196 | 85649  | 85942  | 4.72E-14 | 0.9  |
| 28196 | 87532  | 88132  | 2.74E-38 | 0.68 |
| 28196 | 110656 | 111471 | 1.05E-27 | 0.76 |
| 28196 | 125868 | 126129 | 1.46E-13 | 0.78 |
| 28197 | 6990   | 7314   | 2.91E-32 | 0.82 |
| 28197 | 13915  | 14592  | 1.89E-50 | 0.96 |
| 28197 | 17086  | 17493  | 2.15E-36 | 0.98 |
| 28197 | 17839  | 18129  | 7.40E-40 | 0.97 |
| 28199 | 6116   | 6504   | 2.64E-85 | 0.92 |
| 28199 | 7426   | 7829   | 3.71E-27 | 0.93 |
| 28200 | 35301  | 36724  | 2.67E-23 | 0.76 |
| 28200 | 43989  | 44691  | 2.20E-68 | 0.79 |
| 28200 | 49902  | 50770  | 3.71E-32 | 0.78 |
| 28200 | 97705  | 97909  | 4.78E-14 | 0.85 |
| 28202 | 7865   | 8702   | 1.82E-42 | 0.97 |
| 28202 | 14298  | 14515  | 1.13E-12 | 0.98 |
| 28202 | 31288  | 31666  | 1.06E-23 | 0.81 |
| 28202 | 32080  | 34453  | 1.62E-94 | 0.84 |
| 28202 | 34914  | 35149  | 1.34E-15 | 0.83 |
| 28202 | 36238  | 36650  | 7.16E-16 | 0.88 |
| 28202 | 42119  | 42504  | 1.90E-22 | 0.81 |
| 28202 | 42767  | 43555  | 1.64E-17 | 0.63 |
| 28202 | 43812  | 44022  | 5.35E-23 | 0.63 |
| 28202 | 59426  | 59704  | 4.73E-23 | 0.86 |
| 28205 | 5186   | 5485   | 6.44E-42 | 0.91 |
| 28205 | 6140   | 6430   | 7.63E-27 | 0.66 |
| 28205 | 18217  | 19333  | 6.24E-28 | 0.7  |

|       |        |        |           |      |
|-------|--------|--------|-----------|------|
| 28205 | 23357  | 23944  | 7.90E-34  | 0.69 |
| 28206 | 5559   | 6306   | 2.43E-23  | 0.79 |
| 28207 | 13867  | 14864  | 9.29E-20  | 0.65 |
| 28207 | 25646  | 25925  | 4.91E-24  | 0.8  |
| 28207 | 67211  | 67480  | 3.73E-15  | 0.78 |
| 28207 | 68425  | 69136  | 4.46E-21  | 0.64 |
| 28207 | 73967  | 74905  | 8.00E-23  | 0.74 |
| 28208 | 17720  | 17925  | 2.58E-10  | 0.82 |
| 28208 | 22562  | 23246  | 1.71E-37  | 0.82 |
| 28208 | 23848  | 24786  | 9.75E-35  | 0.89 |
| 28208 | 39044  | 39664  | 9.58E-21  | 0.7  |
| 28211 | 2630   | 3230   | 5.28E-37  | 0.83 |
| 28211 | 10448  | 11143  | 3.17E-26  | 0.87 |
| 28211 | 11934  | 12516  | 1.80E-59  | 0.96 |
| 28211 | 13071  | 13502  | 1.59E-101 | 0.95 |
| 28211 | 18543  | 18811  | 9.57E-24  | 0.9  |
| 28211 | 74583  | 74897  | 5.41E-10  | 0.78 |
| 28212 | 7723   | 7963   | 8.92E-07  | 0.91 |
| 28212 | 8746   | 9184   | 1.37E-08  | 0.91 |
| 28212 | 16558  | 17081  | 4.07E-14  | 0.73 |
| 28212 | 59807  | 60180  | 5.61E-06  | 0.93 |
| 28212 | 91615  | 91816  | 1.59E-05  | 0.85 |
| 28212 | 119571 | 119988 | 1.01E-06  | 0.79 |
| 28212 | 120326 | 120619 | 7.04E-10  | 0.98 |
| 28212 | 135476 | 135907 | 1.72E-11  | 0.83 |
| 28215 | 25428  | 25672  | 2.70E-07  | 0.77 |
| 28219 | 15864  | 16277  | 1.90E-40  | 0.88 |
| 28219 | 16482  | 17179  | 1.81E-84  | 0.89 |
| 28220 | 2918   | 3657   | 4.46E-10  | 1    |
| 28220 | 35882  | 36182  | 2.95E-13  | 0.89 |
| 28220 | 50895  | 51123  | 3.46E-03  | 0.89 |
| 28220 | 57639  | 57987  | 4.32E-05  | 0.82 |
| 28220 | 60306  | 60852  | 2.69E-09  | 0.85 |
| 28220 | 62790  | 63255  | 9.28E-06  | 0.86 |
| 28223 | 14028  | 14349  | 1.76E-04  | 0.73 |
| 28223 | 29166  | 30094  | 2.37E-25  | 0.81 |
| 28223 | 37768  | 38919  | 1.10E-83  | 0.9  |
| 28223 | 45749  | 46727  | 1.01E-114 | 0.8  |
| 28223 | 47436  | 48078  | 1.76E-30  | 0.83 |
| 28225 | 22412  | 22765  | 7.97E-21  | 0.88 |
| 28225 | 23012  | 23531  | 4.85E-19  | 0.94 |
| 28225 | 23761  | 24402  | 3.30E-41  | 0.75 |
| 28226 | 11256  | 11886  | 5.85E-44  | 0.89 |
| 28226 | 15727  | 16161  | 7.34E-28  | 0.81 |
| 28226 | 24813  | 26382  | 1.20E-34  | 0.6  |
| 28226 | 26672  | 27028  | 3.88E-41  | 0.89 |
| 28226 | 27063  | 27474  | 3.33E-27  | 0.85 |
| 28226 | 31407  | 31784  | 8.93E-42  | 0.89 |
| 28226 | 39397  | 40226  | 1.60E-34  | 0.82 |
| 28226 | 40542  | 40746  | 7.80E-26  | 0.86 |
| 28226 | 46958  | 47210  | 1.09E-06  | 0.74 |
| 28226 | 109535 | 109933 | 1.22E-17  | 0.71 |
| 28226 | 110158 | 110473 | 3.76E-15  | 0.87 |

|       |        |        |           |      |
|-------|--------|--------|-----------|------|
| 28226 | 125748 | 125998 | 1.05E-38  | 0.85 |
| 28226 | 146970 | 147520 | 8.04E-28  | 0.84 |
| 28226 | 154834 | 155385 | 3.67E-22  | 0.79 |
| 28226 | 157835 | 158694 | 2.30E-39  | 0.88 |
| 28226 | 158993 | 159725 | 3.57E-32  | 0.85 |
| 28226 | 160704 | 161053 | 1.48E-30  | 0.83 |
| 28226 | 164595 | 164942 | 4.58E-24  | 0.91 |
| 28226 | 180639 | 183422 | 1.78E-157 | 0.82 |
| 28226 | 186669 | 188706 | 6.46E-183 | 0.75 |
| 28226 | 189615 | 190200 | 1.44E-73  | 0.87 |
| 28226 | 194186 | 194484 | 3.58E-25  | 0.91 |
| 28226 | 201484 | 201863 | 5.13E-17  | 0.76 |
| 28226 | 212318 | 212595 | 2.99E-17  | 0.81 |
| 28226 | 212418 | 212676 | 1.58E-16  | 0.78 |
| 28226 | 238288 | 239145 | 9.79E-96  | 0.88 |
| 28226 | 244001 | 244207 | 4.46E-21  | 0.87 |
| 28226 | 259854 | 260133 | 6.39E-20  | 0.91 |
| 28226 | 261821 | 262256 | 2.77E-15  | 0.81 |
| 28226 | 262684 | 263541 | 6.40E-29  | 0.83 |
| 28226 | 269427 | 269737 | 1.39E-19  | 0.81 |
| 28226 | 277654 | 277878 | 1.95E-33  | 0.96 |
| 28228 | 10993  | 11195  | 3.37E-03  | 0.83 |
| 28229 | 5514   | 5833   | 3.52E-26  | 0.96 |
| 28229 | 6279   | 6519   | 8.02E-21  | 0.8  |
| 28230 | 2000   | 2264   | 1.20E-06  | 0.94 |
| 28230 | 8779   | 8999   | 3.27E-09  | 0.81 |
| 28230 | 9051   | 9392   | 3.89E-11  | 0.89 |
| 28233 | 5187   | 5715   | 2.06E-07  | 0.95 |
| 28237 | 2718   | 3220   | 3.16E-19  | 0.67 |
| 28238 | 6      | 761    | 7.64E-23  | 0.82 |
| 28238 | 3949   | 4308   | 3.11E-16  | 0.74 |
| 28240 | 7817   | 8023   | 9.30E-09  | 0.83 |
| 28240 | 23971  | 24474  | 2.79E-07  | 0.96 |
| 28240 | 26420  | 26689  | 6.31E-10  | 0.97 |
| 28240 | 28091  | 28361  | 2.14E-09  | 0.83 |
| 28240 | 29041  | 29253  | 5.19E-06  | 0.78 |
| 28240 | 29060  | 29344  | 8.00E-09  | 0.81 |
| 28240 | 38357  | 38666  | 2.77E-05  | 0.87 |
| 28246 | 9644   | 10048  | 5.10E-34  | 0.9  |
| 28246 | 12072  | 13272  | 4.37E-53  | 0.8  |
| 28246 | 32112  | 32447  | 4.75E-09  | 0.79 |
| 28246 | 42068  | 42573  | 5.36E-09  | 0.82 |
| 28249 | 1395   | 2097   | 1.18E-60  | 0.94 |
| 28256 | 77506  | 77863  | 3.27E-27  | 0.87 |
| 28256 | 78637  | 78912  | 6.77E-32  | 0.82 |
| 28256 | 81305  | 81602  | 2.45E-12  | 0.7  |
| 28256 | 85290  | 85898  | 9.44E-73  | 0.97 |
| 28256 | 86138  | 86448  | 2.38E-52  | 0.94 |
| 28256 | 93104  | 93641  | 4.03E-47  | 0.79 |
| 28257 | 1281   | 1572   | 1.85E-08  | 0.84 |
| 28263 | 35058  | 35355  | 1.78E-33  | 0.9  |
| 28263 | 36158  | 37515  | 2.24E-102 | 0.91 |
| 28263 | 38761  | 39519  | 4.36E-108 | 0.94 |

|       |        |        |           |      |
|-------|--------|--------|-----------|------|
| 28263 | 45918  | 46575  | 5.12E-68  | 0.97 |
| 28263 | 47156  | 47638  | 1.83E-51  | 0.95 |
| 28263 | 57175  | 57479  | 8.20E-15  | 0.79 |
| 28266 | 45804  | 47383  | 2.84E-135 | 0.86 |
| 28266 | 49292  | 49762  | 5.53E-31  | 0.74 |
| 28266 | 50313  | 51710  | 1.67E-101 | 0.78 |
| 28281 | 7158   | 7955   | 2.77E-38  | 0.88 |
| 28281 | 36161  | 36542  | 2.53E-27  | 0.9  |
| 28281 | 39406  | 40021  | 4.66E-20  | 0.84 |
| 28281 | 61704  | 62277  | 1.61E-09  | 0.7  |
| 28281 | 64413  | 65225  | 2.94E-42  | 0.87 |
| 28281 | 67769  | 68289  | 7.77E-22  | 0.78 |
| 28281 | 81251  | 82019  | 1.40E-21  | 0.84 |
| 28281 | 92164  | 92576  | 8.30E-15  | 0.69 |
| 28281 | 110351 | 110974 | 6.03E-46  | 0.74 |
| 28281 | 111778 | 112425 | 3.80E-29  | 0.86 |
| 28281 | 117571 | 117886 | 1.65E-13  | 0.73 |
| 28281 | 129413 | 129877 | 2.02E-29  | 0.82 |
| 28281 | 130391 | 130913 | 6.61E-26  | 0.82 |
| 28281 | 133618 | 134933 | 1.01E-42  | 0.73 |
| 28281 | 140590 | 140844 | 1.07E-22  | 0.63 |
| 28281 | 142173 | 142771 | 1.61E-15  | 0.87 |
| 28281 | 147300 | 148250 | 6.87E-62  | 0.78 |
| 28281 | 150055 | 151419 | 1.93E-64  | 0.8  |
| 28281 | 151687 | 152973 | 4.86E-51  | 0.81 |
| 28281 | 157160 | 157543 | 1.81E-10  | 0.89 |
| 28282 | 6426   | 7155   | 7.31E-32  | 0.81 |
| 28283 | 1047   | 1366   | 3.19E-07  | 1    |
| 28283 | 1625   | 1868   | 6.18E-05  | 0.74 |
| 28286 | 7567   | 7876   | 2.51E-12  | 0.97 |
| 28286 | 8796   | 9101   | 9.01E-06  | 0.95 |
| 28293 | 5917   | 6963   | 1.32E-50  | 0.83 |
| 28293 | 7617   | 8044   | 3.16E-29  | 0.91 |
| 28293 | 8522   | 8809   | 1.79E-14  | 0.79 |
| 28293 | 10346  | 10611  | 4.50E-14  | 0.95 |
| 28293 | 14738  | 17144  | 2.51E-88  | 0.84 |
| 28293 | 18244  | 19595  | 1.20E-44  | 0.81 |
| 28293 | 20952  | 21690  | 6.35E-36  | 0.92 |
| 28293 | 25004  | 26473  | 1.89E-65  | 0.91 |
| 28296 | 5365   | 5610   | 3.05E-32  | 0.87 |
| 28296 | 28258  | 29050  | 7.87E-25  | 0.78 |
| 28297 | 49844  | 50186  | 2.05E-06  | 0.62 |
| 28297 | 51308  | 52734  | 1.53E-36  | 0.81 |
| 28304 | 4456   | 5004   | 4.84E-08  | 0.62 |
| 28304 | 16173  | 17362  | 4.06E-52  | 0.83 |
| 28304 | 27351  | 28416  | 7.29E-77  | 0.91 |
| 28304 | 29355  | 29729  | 5.22E-32  | 0.95 |
| 28304 | 30545  | 31469  | 2.51E-59  | 0.9  |
| 28304 | 38522  | 38761  | 1.71E-15  | 0.94 |
| 28304 | 40542  | 40854  | 1.03E-10  | 0.62 |
| 28304 | 68235  | 68777  | 6.41E-30  | 0.66 |
| 28304 | 69044  | 69397  | 1.61E-12  | 0.79 |
| 28304 | 70995  | 71779  | 1.00E-28  | 0.86 |

|       |        |        |           |      |
|-------|--------|--------|-----------|------|
| 28304 | 74179  | 74443  | 3.04E-12  | 0.68 |
| 28304 | 83525  | 83835  | 3.57E-09  | 0.7  |
| 28304 | 91125  | 91485  | 1.76E-13  | 0.82 |
| 28304 | 108037 | 108370 | 3.45E-28  | 0.94 |
| 28308 | 32346  | 32578  | 4.58E-15  | 0.73 |
| 28308 | 38905  | 39162  | 3.67E-13  | 0.85 |
| 28308 | 39503  | 39854  | 5.93E-17  | 0.81 |
| 28308 | 42326  | 43631  | 1.01E-45  | 0.63 |
| 28308 | 53392  | 53967  | 1.34E-41  | 0.66 |
| 28309 | 4176   | 4556   | 9.93E-13  | 0.96 |
| 28309 | 14102  | 14475  | 2.40E-09  | 0.9  |
| 28309 | 15966  | 16417  | 2.19E-08  | 0.75 |
| 28312 | 4085   | 4370   | 3.32E-20  | 0.84 |
| 28312 | 10682  | 11240  | 1.35E-05  | 0.83 |
| 28312 | 14957  | 15393  | 4.59E-10  | 0.77 |
| 28312 | 74533  | 75764  | 1.55E-193 | 0.94 |
| 28312 | 77101  | 77444  | 2.34E-09  | 0.8  |
| 28312 | 83351  | 84100  | 3.23E-25  | 0.77 |
| 28318 | 7640   | 8693   | 2.47E-44  | 0.82 |
| 28318 | 7832   | 8695   | 9.90E-40  | 0.81 |
| 28320 | 506    | 830    | 1.59E-08  | 0.69 |
| 28320 | 34939  | 35566  | 1.55E-26  | 0.79 |
| 28320 | 35773  | 36291  | 3.72E-27  | 0.85 |
| 28320 | 45423  | 45988  | 1.64E-18  | 0.84 |
| 28320 | 46216  | 46927  | 1.10E-35  | 0.78 |
| 28320 | 47149  | 47523  | 1.83E-16  | 0.87 |
| 28320 | 47419  | 47658  | 1.02E-15  | 0.82 |
| 28320 | 49321  | 49696  | 9.55E-18  | 0.9  |
| 28320 | 62308  | 62733  | 1.45E-22  | 0.86 |
| 28320 | 65626  | 66336  | 1.01E-06  | 0.7  |
| 28320 | 67408  | 68585  | 4.09E-69  | 0.78 |
| 28320 | 69594  | 70036  | 4.37E-14  | 0.65 |
| 28320 | 98438  | 98727  | 3.19E-20  | 0.95 |
| 28320 | 153003 | 153571 | 8.29E-13  | 0.86 |
| 28320 | 154204 | 154657 | 1.37E-21  | 0.79 |
| 28320 | 186381 | 186711 | 1.09E-27  | 0.87 |
| 28320 | 206531 | 206965 | 6.14E-27  | 0.88 |
| 28320 | 215065 | 215372 | 5.49E-08  | 0.76 |
| 28320 | 218355 | 218804 | 2.11E-14  | 0.81 |
| 28320 | 219321 | 219786 | 9.20E-32  | 0.81 |
| 28320 | 220493 | 220951 | 6.98E-37  | 0.72 |
| 28320 | 307036 | 307276 | 6.54E-29  | 0.84 |
| 28320 | 307525 | 307901 | 3.71E-22  | 0.82 |
| 28320 | 310753 | 311729 | 2.22E-43  | 0.86 |
| 28320 | 315005 | 315382 | 1.39E-29  | 0.79 |
| 28320 | 316551 | 317316 | 1.14E-38  | 0.79 |
| 28320 | 317780 | 318061 | 2.03E-37  | 0.97 |
| 28320 | 325511 | 325819 | 8.11E-33  | 0.94 |
| 28320 | 326507 | 326917 | 4.17E-18  | 0.83 |
| 28320 | 334925 | 335228 | 2.62E-53  | 0.78 |
| 28320 | 340221 | 340664 | 9.38E-24  | 0.89 |
| 28320 | 340959 | 341440 | 9.47E-41  | 0.82 |
| 28320 | 380309 | 381114 | 4.44E-25  | 0.79 |



|       |        |        |           |      |
|-------|--------|--------|-----------|------|
| 28320 | 384910 | 385127 | 3.52E-15  | 0.87 |
| 28320 | 404838 | 405536 | 8.37E-56  | 0.89 |
| 28320 | 426313 | 427526 | 4.02E-28  | 0.77 |
| 28320 | 443479 | 443936 | 3.88E-09  | 0.77 |
| 28320 | 451603 | 452106 | 2.64E-09  | 0.86 |
| 28321 | 14339  | 14696  | 1.09E-12  | 0.79 |
| 28324 | 29380  | 29836  | 7.23E-11  | 0.72 |
| 28324 | 52654  | 53017  | 1.69E-22  | 0.84 |
| 28324 | 58387  | 58818  | 9.38E-30  | 0.89 |
| 28324 | 107507 | 107731 | 5.41E-13  | 0.64 |
| 28324 | 126510 | 126913 | 7.43E-18  | 0.85 |
| 28324 | 138566 | 138890 | 1.75E-06  | 0.81 |
| 28327 | 5196   | 5713   | 2.01E-24  | 0.78 |
| 28327 | 48138  | 48751  | 3.05E-19  | 0.79 |
| 28327 | 73592  | 74785  | 1.39E-41  | 0.61 |
| 28327 | 81186  | 81386  | 1.30E-08  | 0.83 |
| 28327 | 88931  | 89149  | 2.94E-31  | 0.89 |
| 28327 | 89912  | 90166  | 1.63E-19  | 0.84 |
| 28327 | 101543 | 102181 | 3.06E-39  | 0.91 |
| 28327 | 105604 | 106374 | 6.74E-38  | 0.82 |
| 28327 | 108572 | 109296 | 6.86E-25  | 0.8  |
| 28327 | 110855 | 111337 | 2.58E-16  | 0.75 |
| 28327 | 133417 | 134019 | 1.07E-26  | 0.76 |
| 28327 | 156556 | 156902 | 1.99E-10  | 0.61 |
| 28327 | 173651 | 174013 | 9.08E-30  | 0.79 |
| 28327 | 177345 | 177875 | 1.46E-62  | 0.93 |
| 28327 | 216557 | 217055 | 3.97E-43  | 0.78 |
| 28327 | 218592 | 218897 | 3.43E-66  | 0.89 |
| 28327 | 223575 | 224284 | 6.69E-45  | 0.86 |
| 28329 | 6925   | 7301   | 1.04E-27  | 0.92 |
| 28329 | 9563   | 10098  | 6.09E-35  | 0.89 |
| 28329 | 16679  | 17049  | 1.73E-32  | 0.65 |
| 28329 | 20899  | 21182  | 6.35E-20  | 0.86 |
| 28329 | 32672  | 33427  | 9.62E-29  | 0.82 |
| 28331 | 7522   | 8141   | 1.82E-48  | 0.74 |
| 28331 | 15291  | 15735  | 1.25E-25  | 0.83 |
| 28333 | 19432  | 20178  | 3.06E-37  | 0.81 |
| 28333 | 30500  | 31033  | 3.46E-55  | 0.87 |
| 28333 | 57191  | 57589  | 2.63E-10  | 0.75 |
| 28333 | 66620  | 67208  | 8.42E-36  | 0.89 |
| 28333 | 74128  | 74597  | 1.01E-18  | 0.88 |
| 28333 | 75454  | 75666  | 4.05E-29  | 0.88 |
| 28333 | 77024  | 77440  | 1.14E-34  | 0.85 |
| 28333 | 88216  | 88882  | 7.29E-23  | 0.8  |
| 28333 | 89937  | 90566  | 5.24E-26  | 0.85 |
| 28333 | 94558  | 95062  | 3.89E-28  | 0.61 |
| 28333 | 120425 | 121211 | 3.47E-27  | 0.82 |
| 28333 | 125008 | 125228 | 3.30E-16  | 0.89 |
| 28333 | 129463 | 130301 | 2.88E-31  | 0.7  |
| 28333 | 176055 | 176428 | 5.51E-40  | 0.95 |
| 28333 | 178341 | 178731 | 9.32E-39  | 0.92 |
| 28333 | 180570 | 181521 | 9.68E-132 | 0.96 |
| 28333 | 261087 | 261708 | 2.37E-26  | 0.82 |

|       |        |        |           |      |
|-------|--------|--------|-----------|------|
| 28333 | 271757 | 272570 | 1.40E-45  | 0.7  |
| 28333 | 311723 | 312183 | 1.29E-16  | 0.62 |
| 28342 | 4409   | 4873   | 9.99E-31  | 0.91 |
| 28342 | 5565   | 5845   | 8.77E-20  | 0.92 |
| 28342 | 6811   | 7638   | 2.28E-49  | 0.89 |
| 28342 | 11003  | 11428  | 6.69E-25  | 0.66 |
| 28345 | 6370   | 6577   | 3.15E-23  | 0.87 |
| 28345 | 13905  | 14641  | 5.04E-40  | 0.92 |
| 28345 | 15311  | 15646  | 1.66E-19  | 0.91 |
| 28345 | 67695  | 68593  | 2.65E-19  | 0.82 |
| 28348 | 15398  | 15703  | 4.46E-11  | 0.62 |
| 28348 | 19582  | 20706  | 5.67E-22  | 0.86 |
| 28349 | 31572  | 31928  | 8.88E-27  | 0.79 |
| 28349 | 34310  | 36012  | 2.44E-137 | 0.9  |
| 28350 | 26549  | 29366  | 2.54E-165 | 0.83 |
| 28350 | 29934  | 30636  | 1.83E-61  | 0.88 |
| 28355 | 1307   | 1699   | 4.88E-15  | 0.62 |
| 28355 | 31133  | 31358  | 4.45E-26  | 0.88 |
| 28357 | 9814   | 10427  | 3.67E-54  | 0.84 |
| 28357 | 10642  | 11493  | 2.66E-70  | 0.93 |
| 28357 | 13637  | 14531  | 6.44E-68  | 0.89 |
| 28357 | 19197  | 20154  | 4.67E-37  | 0.68 |
| 28357 | 21478  | 22090  | 4.00E-19  | 0.83 |
| 28357 | 24959  | 25425  | 3.20E-16  | 0.88 |
| 28357 | 25768  | 26261  | 3.11E-27  | 0.87 |
| 28357 | 26979  | 27283  | 6.63E-14  | 0.89 |
| 28357 | 27509  | 27854  | 3.07E-22  | 0.7  |
| 28357 | 44617  | 45201  | 1.12E-10  | 0.61 |
| 28357 | 50809  | 51504  | 1.11E-27  | 0.73 |
| 28357 | 53612  | 53835  | 3.52E-08  | 0.74 |
| 28357 | 54884  | 55311  | 2.12E-19  | 0.88 |
| 28359 | 78     | 499    | 5.52E-10  | 0.61 |
| 28359 | 7279   | 8390   | 1.07E-53  | 0.75 |
| 28359 | 15808  | 16207  | 4.20E-42  | 0.94 |
| 28359 | 19033  | 19565  | 1.08E-36  | 0.95 |
| 28359 | 22989  | 23401  | 8.39E-54  | 0.93 |
| 28359 | 23741  | 24028  | 1.41E-22  | 0.85 |
| 28359 | 59557  | 60093  | 1.87E-62  | 0.95 |
| 28359 | 60390  | 61158  | 1.07E-84  | 0.91 |
| 28359 | 79749  | 80557  | 3.15E-49  | 0.91 |
| 28359 | 111972 | 112239 | 5.29E-41  | 0.89 |
| 28359 | 117198 | 117418 | 6.24E-45  | 0.93 |
| 28359 | 117836 | 118879 | 1.35E-70  | 0.93 |
| 28359 | 120534 | 120959 | 6.65E-46  | 0.89 |
| 28359 | 128786 | 129095 | 6.38E-16  | 0.85 |
| 28359 | 131365 | 132313 | 2.83E-43  | 0.88 |
| 28359 | 134991 | 135310 | 1.52E-15  | 0.84 |
| 28359 | 165979 | 166293 | 5.61E-22  | 0.73 |
| 28359 | 172720 | 172934 | 2.13E-15  | 0.84 |
| 28359 | 173226 | 173865 | 1.19E-28  | 0.86 |
| 28359 | 176245 | 176706 | 1.77E-24  | 0.9  |
| 28359 | 177245 | 177809 | 5.27E-27  | 0.88 |
| 28359 | 202663 | 202904 | 7.87E-12  | 0.81 |

|       |        |        |          |      |
|-------|--------|--------|----------|------|
| 28359 | 203128 | 203963 | 1.01E-40 | 0.85 |
| 28359 | 204170 | 204724 | 1.86E-46 | 0.96 |
| 28359 | 204931 | 206402 | 1.19E-72 | 0.63 |
| 28359 | 209812 | 210156 | 2.07E-09 | 0.92 |
| 28359 | 237586 | 237810 | 3.04E-05 | 0.95 |
| 28359 | 240097 | 240584 | 1.07E-03 | 0.92 |
| 28359 | 273262 | 273838 | 4.64E-19 | 0.66 |
| 28361 | 6569   | 6874   | 1.81E-06 | 0.91 |
| 28362 | 12970  | 13829  | 7.03E-88 | 0.96 |
| 28362 | 14547  | 15766  | 6.33E-43 | 0.89 |
| 28372 | 309    | 855    | 1.71E-11 | 0.96 |
| 28383 | 6203   | 6481   | 3.05E-10 | 0.83 |
| 28385 | 61355  | 61805  | 2.25E-05 | 0.86 |
| 28391 | 22     | 1087   | 3.06E-66 | 0.76 |
| 28392 | 18944  | 19308  | 5.02E-20 | 0.71 |
| 28392 | 25598  | 25891  | 1.13E-16 | 0.81 |
| 28392 | 31975  | 33547  | 1.86E-84 | 0.75 |
| 28392 | 59757  | 60901  | 4.88E-43 | 0.64 |
| 28392 | 70282  | 70671  | 2.99E-10 | 0.9  |
| 28394 | 1468   | 2147   | 3.82E-06 | 0.89 |
| 28401 | 5755   | 6033   | 1.11E-12 | 0.85 |
| 28401 | 9878   | 10129  | 2.51E-19 | 0.83 |
| 28402 | 10624  | 10975  | 3.40E-33 | 0.73 |
| 28402 | 16788  | 17424  | 2.27E-07 | 0.85 |
| 28402 | 19570  | 19834  | 8.90E-10 | 0.81 |
| 28405 | 7311   | 7689   | 9.54E-26 | 0.73 |
| 28406 | 12208  | 12439  | 2.26E-33 | 0.86 |
| 28406 | 18476  | 19015  | 1.41E-12 | 0.96 |
| 28408 | 804    | 1121   | 2.27E-06 | 0.34 |
| 28408 | 809    | 1128   | 9.14E-06 | 0.39 |
| 28408 | 35091  | 35410  | 2.33E-76 | 0.89 |
| 28408 | 39639  | 39922  | 9.89E-32 | 0.99 |
| 28408 | 48385  | 48793  | 4.43E-68 | 0.98 |
| 28408 | 59030  | 59819  | 1.84E-30 | 0.77 |
| 28408 | 83897  | 84474  | 9.15E-26 | 0.68 |
| 28408 | 86927  | 87301  | 3.07E-43 | 0.74 |
| 28408 | 87513  | 88211  | 1.36E-22 | 0.73 |
| 28408 | 92815  | 93688  | 5.27E-77 | 0.94 |
| 28408 | 94258  | 95382  | 9.22E-60 | 0.94 |
| 28408 | 96284  | 96606  | 2.41E-51 | 0.91 |
| 28408 | 98253  | 98952  | 7.98E-26 | 0.73 |
| 28408 | 99745  | 100301 | 4.09E-15 | 0.75 |
| 28408 | 100523 | 100811 | 4.97E-40 | 0.95 |
| 28410 | 8438   | 8728   | 6.07E-04 | 0.84 |
| 28410 | 31809  | 32009  | 6.54E-03 | 0.77 |
| 28410 | 34904  | 35131  | 5.13E-07 | 0.79 |
| 28410 | 61216  | 61544  | 2.24E-05 | 0.84 |
| 28410 | 71438  | 71796  | 1.37E-04 | 0.9  |
| 28410 | 82676  | 83102  | 6.90E-07 | 0.92 |
| 28410 | 83017  | 83257  | 4.33E-05 | 0.95 |
| 28411 | 1390   | 1930   | 1.69E-17 | 0.7  |
| 28411 | 49269  | 49675  | 7.38E-08 | 0.79 |
| 28412 | 2108   | 2430   | 7.91E-10 | 0.8  |

|       |        |        |          |      |
|-------|--------|--------|----------|------|
| 28412 | 22947  | 23451  | 4.45E-07 | 0.77 |
| 28424 | 1755   | 1973   | 2.49E-10 | 0.72 |
| 28428 | 7333   | 8210   | 4.14E-34 | 0.91 |
| 28428 | 8950   | 9352   | 2.73E-34 | 0.86 |
| 28429 | 29208  | 29703  | 4.11E-16 | 0.82 |
| 28429 | 56239  | 56587  | 4.70E-08 | 0.86 |
| 28429 | 61158  | 61560  | 2.70E-16 | 0.77 |
| 28429 | 76025  | 76294  | 7.07E-07 | 1    |
| 28429 | 85341  | 85649  | 1.31E-23 | 0.81 |
| 28430 | 7303   | 7646   | 4.09E-05 | 0.88 |
| 28431 | 30329  | 30611  | 2.60E-08 | 0.77 |
| 28438 | 11141  | 11865  | 3.82E-55 | 0.93 |
| 28438 | 12740  | 13148  | 1.35E-45 | 0.85 |
| 28442 | 2458   | 3645   | 3.06E-45 | 0.96 |
| 28447 | 6200   | 6557   | 2.80E-13 | 0.76 |
| 28447 | 20008  | 20489  | 6.56E-20 | 0.71 |
| 28448 | 15828  | 16319  | 3.12E-18 | 0.81 |
| 28448 | 16927  | 17830  | 3.42E-25 | 0.82 |
| 28448 | 95943  | 96302  | 6.45E-55 | 0.95 |
| 28448 | 111063 | 111447 | 9.42E-26 | 0.87 |
| 28448 | 122797 | 123169 | 1.38E-11 | 0.84 |
| 28448 | 124348 | 125352 | 1.27E-41 | 0.86 |
| 28448 | 125569 | 126301 | 1.74E-50 | 0.87 |
| 28448 | 156598 | 156887 | 2.57E-05 | 1    |
| 28448 | 180245 | 180835 | 6.42E-37 | 0.79 |
| 28448 | 186078 | 186491 | 1.23E-21 | 0.9  |
| 28448 | 193568 | 193942 | 6.38E-13 | 0.86 |
| 28448 | 194159 | 194698 | 3.41E-94 | 0.93 |
| 28448 | 206339 | 206659 | 8.66E-19 | 0.91 |
| 28448 | 206867 | 207144 | 4.64E-17 | 0.81 |
| 28448 | 231466 | 232562 | 7.83E-48 | 0.7  |
| 28448 | 245006 | 245272 | 1.51E-05 | 0.75 |
| 28449 | 4628   | 4988   | 7.70E-49 | 0.96 |
| 28449 | 5822   | 6048   | 3.54E-16 | 0.95 |
| 28449 | 18974  | 19521  | 3.03E-30 | 0.77 |
| 28450 | 826    | 1424   | 1.17E-22 | 0.96 |
| 28452 | 10800  | 11967  | 3.66E-58 | 0.81 |
| 28452 | 14391  | 14643  | 1.15E-11 | 0.77 |
| 28454 | 1372   | 1606   | 7.61E-05 | 1    |
| 28455 | 17968  | 18467  | 2.55E-48 | 0.94 |
| 28455 | 19132  | 20025  | 5.92E-43 | 0.92 |
| 28455 | 21173  | 21598  | 7.79E-16 | 0.78 |
| 28455 | 51080  | 52114  | 1.39E-38 | 0.75 |
| 28455 | 82158  | 82460  | 4.75E-44 | 0.77 |
| 28455 | 82695  | 83168  | 3.28E-45 | 0.84 |
| 28455 | 83423  | 84414  | 1.71E-20 | 0.63 |
| 28455 | 155338 | 155881 | 2.38E-52 | 0.83 |
| 28455 | 159750 | 159996 | 5.07E-31 | 0.9  |
| 28456 | 15498  | 16017  | 2.21E-20 | 0.82 |
| 28456 | 19544  | 19870  | 7.39E-07 | 0.75 |
| 28458 | 31163  | 31447  | 2.26E-32 | 0.81 |
| 28460 | 6657   | 8245   | 3.36E-49 | 0.74 |
| 28460 | 10042  | 10255  | 2.56E-19 | 0.74 |

|       |        |        |           |      |
|-------|--------|--------|-----------|------|
| 28460 | 10913  | 12027  | 1.32E-37  | 0.85 |
| 28460 | 15924  | 16557  | 2.65E-29  | 0.71 |
| 28462 | 10852  | 11182  | 4.26E-09  | 0.8  |
| 28462 | 12647  | 13728  | 8.11E-78  | 0.79 |
| 28462 | 22870  | 23098  | 4.35E-24  | 0.89 |
| 28462 | 29196  | 29946  | 1.53E-11  | 0.77 |
| 28462 | 30541  | 31721  | 2.57E-68  | 0.73 |
| 28462 | 39373  | 40367  | 1.83E-57  | 0.88 |
| 28462 | 40582  | 41060  | 1.21E-26  | 0.91 |
| 28462 | 41296  | 42051  | 5.29E-43  | 0.9  |
| 28469 | 11217  | 11851  | 2.96E-43  | 0.93 |
| 28469 | 12232  | 12786  | 2.44E-81  | 0.93 |
| 28469 | 14433  | 15080  | 8.51E-51  | 0.92 |
| 28469 | 32536  | 32744  | 3.80E-22  | 0.86 |
| 28469 | 32992  | 33879  | 2.24E-38  | 0.88 |
| 28469 | 34100  | 35078  | 8.71E-24  | 0.86 |
| 28469 | 35326  | 36513  | 6.94E-60  | 0.71 |
| 28469 | 40977  | 41301  | 1.09E-10  | 0.91 |
| 28469 | 52858  | 53344  | 4.21E-23  | 0.81 |
| 28470 | 12822  | 13286  | 1.24E-27  | 0.8  |
| 28470 | 41234  | 41715  | 2.90E-47  | 0.82 |
| 28470 | 41971  | 42327  | 2.18E-37  | 0.84 |
| 28470 | 48918  | 49589  | 2.45E-32  | 0.97 |
| 28470 | 61184  | 61738  | 9.61E-08  | 0.68 |
| 28470 | 82675  | 83059  | 2.11E-53  | 0.91 |
| 28470 | 92957  | 93653  | 2.50E-28  | 0.84 |
| 28470 | 94082  | 94771  | 8.71E-59  | 0.89 |
| 28470 | 97967  | 98459  | 8.45E-36  | 0.85 |
| 28470 | 98890  | 99285  | 1.13E-37  | 0.61 |
| 28470 | 104377 | 105105 | 1.27E-45  | 0.85 |
| 28470 | 105843 | 107161 | 1.96E-82  | 0.88 |
| 28470 | 111193 | 112437 | 3.45E-67  | 0.85 |
| 28470 | 112863 | 113106 | 2.41E-18  | 0.84 |
| 28470 | 114408 | 114895 | 7.98E-11  | 0.61 |
| 28470 | 116274 | 116777 | 1.80E-41  | 0.91 |
| 28470 | 120824 | 121135 | 2.68E-05  | 0.67 |
| 28470 | 124385 | 125582 | 1.89E-26  | 0.77 |
| 28470 | 128475 | 129296 | 1.17E-54  | 0.82 |
| 28470 | 130031 | 130362 | 2.72E-43  | 0.85 |
| 28470 | 131003 | 132827 | 2.15E-135 | 0.67 |
| 28470 | 152682 | 153038 | 3.32E-19  | 0.96 |
| 28470 | 153722 | 155236 | 2.98E-61  | 0.77 |
| 28470 | 171148 | 171672 | 7.09E-11  | 0.81 |
| 28470 | 174938 | 175940 | 3.63E-66  | 0.81 |
| 28470 | 176794 | 177992 | 2.04E-34  | 0.72 |
| 28470 | 180435 | 180665 | 4.43E-10  | 0.73 |
| 28470 | 184269 | 185321 | 7.50E-53  | 0.69 |
| 28470 | 194547 | 194759 | 5.51E-13  | 0.89 |
| 28470 | 204937 | 205278 | 4.41E-75  | 0.83 |
| 28477 | 2801   | 3105   | 1.61E-03  | 0.86 |
| 28479 | 11544  | 11791  | 5.46E-11  | 0.79 |
| 28479 | 18205  | 19344  | 1.18E-23  | 0.73 |
| 28479 | 32086  | 33222  | 1.35E-111 | 0.93 |

|       |        |        |           |      |
|-------|--------|--------|-----------|------|
| 28479 | 33584  | 34566  | 3.83E-62  | 0.94 |
| 28489 | 7741   | 8331   | 2.54E-31  | 0.76 |
| 28489 | 8748   | 9393   | 2.34E-48  | 0.88 |
| 28489 | 9412   | 9778   | 9.88E-15  | 0.78 |
| 28489 | 9982   | 10452  | 3.66E-48  | 0.87 |
| 28489 | 12180  | 13190  | 1.47E-31  | 0.83 |
| 28489 | 13486  | 14666  | 3.89E-58  | 0.88 |
| 28490 | 7413   | 7727   | 7.94E-08  | 0.84 |
| 28490 | 9540   | 9861   | 1.45E-13  | 0.81 |
| 28492 | 6078   | 6877   | 3.02E-42  | 0.85 |
| 28492 | 7174   | 7527   | 7.79E-16  | 0.87 |
| 28492 | 7916   | 8189   | 1.30E-13  | 0.83 |
| 28492 | 11808  | 12134  | 1.18E-19  | 0.85 |
| 28492 | 16688  | 17541  | 1.05E-33  | 0.79 |
| 28492 | 22407  | 22896  | 2.24E-12  | 0.66 |
| 28492 | 26728  | 27009  | 1.37E-05  | 0.93 |
| 28492 | 48358  | 48713  | 7.21E-22  | 0.89 |
| 28492 | 51181  | 52103  | 2.62E-22  | 0.63 |
| 28492 | 79107  | 79527  | 8.36E-14  | 0.65 |
| 28492 | 79760  | 80235  | 7.81E-49  | 0.82 |
| 28492 | 82171  | 82776  | 1.86E-62  | 0.83 |
| 28492 | 83279  | 84139  | 3.66E-56  | 0.85 |
| 28492 | 99420  | 100281 | 8.08E-43  | 0.86 |
| 28492 | 104743 | 105124 | 9.26E-30  | 0.93 |
| 28492 | 112584 | 113041 | 1.41E-26  | 0.91 |
| 28492 | 113475 | 113942 | 3.25E-48  | 0.96 |
| 28492 | 116666 | 117102 | 1.05E-09  | 0.92 |
| 28492 | 134981 | 136108 | 2.48E-73  | 0.87 |
| 28492 | 156037 | 156879 | 1.84E-37  | 0.79 |
| 28492 | 167587 | 168037 | 5.87E-19  | 0.87 |
| 28492 | 168316 | 168743 | 6.26E-28  | 0.78 |
| 28492 | 175232 | 175497 | 4.38E-09  | 0.82 |
| 28492 | 177906 | 178261 | 1.82E-14  | 0.85 |
| 28498 | 14117  | 14683  | 2.85E-23  | 0.94 |
| 28498 | 30914  | 31427  | 1.78E-42  | 0.62 |
| 28498 | 34263  | 35246  | 4.82E-189 | 0.88 |
| 28498 | 35676  | 36233  | 6.42E-39  | 0.93 |
| 28498 | 36822  | 37130  | 3.12E-13  | 0.82 |
| 28498 | 38521  | 39224  | 2.49E-47  | 0.92 |
| 28498 | 54434  | 54997  | 6.23E-39  | 0.98 |
| 28498 | 69623  | 69868  | 7.32E-09  | 0.88 |
| 28498 | 89398  | 90724  | 8.91E-56  | 0.88 |
| 28502 | 8876   | 9274   | 7.62E-07  | 0.85 |
| 28502 | 15776  | 16146  | 1.97E-07  | 0.79 |
| 28504 | 47347  | 47848  | 1.20E-05  | 0.96 |
| 28504 | 51836  | 52239  | 2.21E-09  | 0.62 |
| 28505 | 8743   | 8995   | 6.80E-26  | 0.77 |
| 28505 | 9557   | 9894   | 3.06E-12  | 0.6  |
| 28505 | 13957  | 14230  | 3.56E-10  | 0.69 |
| 28505 | 23027  | 23378  | 1.09E-29  | 0.97 |
| 28505 | 40310  | 41579  | 1.31E-54  | 0.87 |
| 28505 | 41942  | 42384  | 1.68E-41  | 0.95 |
| 28505 | 43808  | 44123  | 1.26E-08  | 0.73 |

|       |        |        |           |      |
|-------|--------|--------|-----------|------|
| 28505 | 51980  | 52214  | 7.99E-25  | 0.84 |
| 28507 | 26753  | 28128  | 1.33E-28  | 0.77 |
| 28507 | 29840  | 30337  | 2.08E-54  | 0.66 |
| 28507 | 55938  | 56386  | 9.28E-11  | 0.69 |
| 28507 | 76607  | 77182  | 7.06E-07  | 0.74 |
| 28507 | 77403  | 78510  | 2.60E-24  | 0.61 |
| 28507 | 90900  | 91179  | 4.17E-16  | 0.85 |
| 28507 | 91634  | 92050  | 2.99E-08  | 0.78 |
| 28507 | 123398 | 123718 | 1.09E-33  | 0.84 |
| 28507 | 125732 | 126044 | 1.94E-18  | 0.92 |
| 28507 | 127205 | 127452 | 8.38E-19  | 0.79 |
| 28509 | 508    | 773    | 4.02E-24  | 0.77 |
| 28509 | 1548   | 1985   | 6.56E-16  | 0.77 |
| 28509 | 12654  | 13626  | 1.06E-97  | 0.93 |
| 28509 | 36986  | 37218  | 1.07E-06  | 0.8  |
| 28509 | 45369  | 45862  | 6.56E-07  | 0.85 |
| 28509 | 51231  | 51643  | 1.45E-14  | 0.86 |
| 28511 | 7188   | 8479   | 1.40E-26  | 0.83 |
| 28515 | 10075  | 10465  | 7.72E-19  | 0.76 |
| 28515 | 11582  | 11884  | 1.23E-10  | 0.85 |
| 28515 | 14089  | 14535  | 1.33E-39  | 0.95 |
| 28515 | 26050  | 27151  | 1.20E-59  | 0.95 |
| 28515 | 38481  | 38702  | 2.46E-09  | 0.87 |
| 28515 | 55037  | 56235  | 9.95E-35  | 0.7  |
| 28515 | 56627  | 56866  | 2.36E-17  | 0.81 |
| 28515 | 57148  | 57916  | 7.66E-41  | 0.87 |
| 28515 | 60330  | 60694  | 6.39E-55  | 0.85 |
| 28515 | 60993  | 61855  | 3.30E-24  | 0.83 |
| 28515 | 75674  | 76344  | 1.36E-58  | 0.9  |
| 28515 | 88535  | 89124  | 2.51E-45  | 0.88 |
| 28515 | 89727  | 90610  | 4.04E-82  | 0.87 |
| 28515 | 151847 | 152403 | 1.19E-44  | 0.96 |
| 28515 | 154148 | 154505 | 5.93E-16  | 0.85 |
| 28515 | 166459 | 166904 | 2.40E-12  | 0.74 |
| 28517 | 21485  | 21694  | 7.76E-09  | 0.91 |
| 28522 | 2182   | 2410   | 2.22E-32  | 0.96 |
| 28522 | 6756   | 6994   | 4.89E-52  | 0.95 |
| 28522 | 7238   | 7612   | 5.61E-37  | 0.94 |
| 28524 | 4877   | 5212   | 1.52E-18  | 0.79 |
| 28525 | 6785   | 7147   | 2.41E-05  | 0.84 |
| 28525 | 14458  | 14805  | 1.49E-09  | 0.85 |
| 28525 | 96261  | 96715  | 7.67E-26  | 0.77 |
| 28525 | 107517 | 110022 | 2.93E-125 | 0.85 |
| 28525 | 151821 | 152508 | 2.50E-12  | 0.6  |
| 28525 | 165785 | 166922 | 1.74E-52  | 0.79 |
| 28525 | 168454 | 168859 | 7.51E-23  | 0.84 |
| 28525 | 171909 | 172215 | 4.26E-17  | 0.79 |
| 28525 | 172992 | 173402 | 2.80E-27  | 0.93 |
| 28526 | 1884   | 2347   | 1.38E-31  | 0.9  |
| 28527 | 55205  | 55700  | 1.76E-06  | 0.96 |
| 28527 | 60355  | 60705  | 2.49E-07  | 0.89 |
| 28527 | 68970  | 69234  | 1.16E-13  | 0.82 |
| 28534 | 25691  | 26120  | 3.50E-06  | 0.91 |

|       |        |        |          |      |
|-------|--------|--------|----------|------|
| 28535 | 1835   | 2229   | 4.34E-21 | 0.75 |
| 28535 | 4689   | 4916   | 3.33E-05 | 0.79 |
| 28535 | 15493  | 15792  | 7.16E-19 | 0.83 |
| 28535 | 16010  | 16223  | 3.51E-26 | 0.9  |
| 28535 | 16676  | 17374  | 8.77E-69 | 0.9  |
| 28535 | 18042  | 18495  | 7.75E-22 | 0.83 |
| 28535 | 25085  | 26357  | 9.46E-37 | 0.84 |
| 28535 | 31614  | 32421  | 2.42E-42 | 0.81 |
| 28535 | 47102  | 47308  | 2.52E-26 | 0.94 |
| 28535 | 48344  | 48891  | 1.04E-32 | 0.74 |
| 28543 | 50160  | 50539  | 3.23E-21 | 0.91 |
| 28543 | 52982  | 53484  | 3.71E-32 | 0.85 |
| 28543 | 57809  | 58324  | 4.45E-20 | 0.85 |
| 28543 | 91160  | 92222  | 2.36E-58 | 0.77 |
| 28543 | 92501  | 94878  | 7.50E-69 | 0.83 |
| 28543 | 95383  | 95831  | 3.34E-44 | 0.98 |
| 28543 | 96159  | 96692  | 1.38E-15 | 0.81 |
| 28543 | 96902  | 97374  | 2.34E-23 | 0.91 |
| 28543 | 98101  | 98482  | 8.47E-23 | 0.86 |
| 28543 | 107257 | 107546 | 9.46E-07 | 0.75 |
| 28543 | 111746 | 111953 | 3.30E-28 | 0.93 |
| 28543 | 121061 | 121526 | 2.72E-29 | 0.89 |
| 28543 | 121856 | 122102 | 2.45E-22 | 0.91 |
| 28543 | 122471 | 123012 | 1.28E-15 | 0.84 |
| 28546 | 4234   | 5719   | 1.57E-89 | 0.83 |
| 28546 | 8383   | 9232   | 2.73E-43 | 0.86 |
| 28546 | 16147  | 16428  | 1.60E-29 | 0.93 |
| 28546 | 17111  | 17753  | 7.31E-30 | 0.87 |
| 28546 | 20539  | 20905  | 2.86E-37 | 0.84 |
| 28547 | 933    | 1179   | 3.77E-04 | 0.81 |
| 28548 | 4175   | 5122   | 1.02E-31 | 0.86 |
| 28552 | 16354  | 16700  | 1.02E-32 | 0.96 |
| 28552 | 18409  | 18785  | 7.76E-14 | 0.74 |
| 28562 | 72832  | 73144  | 7.86E-05 | 0.86 |
| 28562 | 80445  | 81023  | 1.49E-08 | 1    |
| 28562 | 107724 | 108140 | 2.63E-12 | 0.81 |
| 28562 | 108620 | 109286 | 1.35E-53 | 0.94 |
| 28562 | 109502 | 109937 | 5.28E-16 | 0.9  |
| 28563 | 15614  | 15898  | 1.24E-38 | 0.89 |
| 28563 | 22590  | 23791  | 2.17E-76 | 0.78 |
| 28563 | 27662  | 27998  | 4.35E-42 | 0.93 |
| 28563 | 30261  | 30538  | 5.55E-10 | 0.94 |
| 28563 | 38087  | 38374  | 3.34E-44 | 0.94 |
| 28563 | 43340  | 44002  | 1.83E-35 | 0.75 |
| 28565 | 20178  | 21056  | 1.89E-52 | 0.94 |
| 28565 | 24053  | 24429  | 3.50E-25 | 0.85 |
| 28565 | 54639  | 54971  | 1.83E-24 | 0.77 |
| 28565 | 62169  | 64152  | 2.09E-97 | 0.8  |
| 28565 | 119148 | 120278 | 2.68E-27 | 0.63 |
| 28567 | 11364  | 12536  | 3.64E-26 | 0.8  |
| 28572 | 7594   | 7834   | 9.53E-17 | 0.95 |
| 28579 | 51     | 446    | 4.00E-09 | 0.95 |
| 28579 | 1735   | 1986   | 9.92E-07 | 0.96 |



|       |        |        |           |      |
|-------|--------|--------|-----------|------|
| 28580 | 3421   | 3698   | 2.09E-22  | 0.92 |
| 28580 | 12655  | 13017  | 9.75E-19  | 0.87 |
| 28582 | 22523  | 23414  | 4.79E-38  | 0.79 |
| 28582 | 24192  | 25065  | 1.83E-32  | 0.81 |
| 28582 | 30985  | 31648  | 1.03E-19  | 0.64 |
| 28582 | 48856  | 49214  | 5.44E-28  | 0.82 |
| 28582 | 100339 | 100621 | 6.53E-12  | 0.9  |
| 28582 | 123711 | 123985 | 3.90E-16  | 0.77 |
| 28582 | 128169 | 128695 | 1.15E-36  | 0.82 |
| 28582 | 152103 | 152384 | 9.81E-34  | 0.75 |
| 28582 | 162963 | 163512 | 5.57E-52  | 0.61 |
| 28582 | 166466 | 168095 | 2.23E-104 | 0.82 |
| 28582 | 171790 | 172725 | 1.16E-50  | 0.71 |
| 28582 | 175682 | 176562 | 2.09E-31  | 0.77 |
| 28582 | 176966 | 178579 | 5.87E-68  | 0.85 |
| 28582 | 183865 | 184189 | 5.44E-17  | 0.73 |
| 28583 | 22871  | 23159  | 3.71E-10  | 0.79 |
| 28583 | 22908  | 23270  | 3.82E-08  | 0.79 |
| 28583 | 30972  | 31525  | 3.30E-37  | 0.61 |
| 28583 | 31848  | 32084  | 1.29E-22  | 0.93 |
| 28583 | 41609  | 41872  | 2.68E-10  | 0.79 |
| 28583 | 45270  | 45581  | 1.80E-19  | 0.95 |
| 28583 | 50246  | 50724  | 1.19E-33  | 0.86 |
| 28583 | 51410  | 51659  | 3.91E-22  | 0.89 |
| 28583 | 51888  | 52298  | 1.11E-15  | 0.8  |
| 28588 | 749    | 1262   | 1.90E-12  | 0.8  |
| 28589 | 6032   | 6798   | 3.90E-30  | 0.82 |
| 28590 | 5003   | 5267   | 1.70E-04  | 0.87 |
| 28592 | 19     | 698    | 1.78E-26  | 0.81 |
| 28592 | 9475   | 9736   | 8.74E-35  | 0.86 |
| 28592 | 12629  | 13642  | 2.46E-32  | 0.62 |
| 28592 | 14623  | 14972  | 4.24E-31  | 0.87 |
| 28592 | 21127  | 21599  | 8.94E-37  | 0.87 |
| 28592 | 21820  | 22291  | 6.24E-19  | 0.89 |
| 28592 | 46874  | 47689  | 9.40E-71  | 0.82 |
| 28592 | 57199  | 57412  | 1.19E-24  | 0.87 |
| 28592 | 78584  | 79099  | 1.80E-09  | 0.7  |
| 28592 | 96692  | 98703  | 3.07E-79  | 0.76 |
| 28592 | 101952 | 102503 | 2.74E-23  | 0.77 |
| 28597 | 34259  | 35338  | 2.68E-43  | 0.88 |
| 28597 | 41086  | 41754  | 3.71E-27  | 0.91 |
| 28597 | 53850  | 54489  | 2.21E-19  | 0.95 |
| 28597 | 54728  | 55080  | 5.56E-15  | 0.86 |
| 28597 | 68629  | 70137  | 2.81E-40  | 0.77 |
| 28597 | 76839  | 77197  | 1.07E-26  | 0.93 |
| 28601 | 20259  | 21188  | 1.45E-44  | 0.75 |
| 28603 | 22257  | 22491  | 4.51E-28  | 1    |
| 28603 | 26077  | 26404  | 1.26E-33  | 0.97 |
| 28603 | 60683  | 61347  | 5.87E-77  | 0.95 |
| 28603 | 65654  | 66131  | 5.66E-45  | 0.67 |
| 28607 | 10106  | 10444  | 4.47E-09  | 0.84 |
| 28607 | 15915  | 16160  | 5.69E-06  | 0.8  |
| 28609 | 15557  | 15802  | 2.64E-04  | 0.98 |

|       |        |        |          |      |
|-------|--------|--------|----------|------|
| 28609 | 21224  | 21428  | 3.14E-11 | 0.64 |
| 28609 | 42661  | 43074  | 5.00E-55 | 0.88 |
| 28609 | 45968  | 46955  | 2.82E-55 | 0.89 |
| 28609 | 52532  | 53514  | 1.09E-33 | 0.66 |
| 28609 | 66013  | 66789  | 4.04E-26 | 0.67 |
| 28609 | 81878  | 83420  | 9.70E-42 | 0.79 |
| 28609 | 88212  | 88603  | 1.85E-26 | 0.64 |
| 28609 | 110426 | 110646 | 3.51E-26 | 0.9  |
| 28610 | 3814   | 4532   | 6.29E-69 | 0.84 |
| 28610 | 4733   | 5229   | 9.51E-46 | 0.86 |
| 28610 | 9061   | 9411   | 5.83E-40 | 0.89 |
| 28610 | 14024  | 14467  | 8.59E-24 | 0.83 |
| 28610 | 15453  | 16027  | 8.23E-21 | 0.84 |
| 28611 | 9126   | 9488   | 2.79E-13 | 0.93 |
| 28611 | 39939  | 40371  | 4.92E-16 | 0.87 |
| 28611 | 40693  | 40997  | 4.41E-12 | 0.84 |
| 28611 | 42936  | 43339  | 1.65E-14 | 0.92 |
| 28611 | 43979  | 44363  | 2.64E-33 | 0.85 |
| 28611 | 54851  | 55521  | 2.58E-13 | 0.71 |
| 28611 | 62123  | 62424  | 7.52E-42 | 0.93 |
| 28611 | 62824  | 63505  | 1.43E-59 | 0.95 |
| 28611 | 72990  | 73732  | 1.65E-42 | 0.81 |
| 28611 | 95239  | 95719  | 1.71E-20 | 0.9  |
| 28612 | 9546   | 9916   | 1.31E-10 | 0.62 |
| 28612 | 14189  | 14456  | 9.36E-06 | 0.89 |
| 28612 | 14951  | 15699  | 3.98E-18 | 0.63 |
| 28612 | 26651  | 27181  | 3.72E-47 | 0.93 |
| 28612 | 28833  | 29992  | 3.19E-84 | 0.83 |
| 28612 | 30247  | 30504  | 1.83E-61 | 0.88 |
| 28612 | 30716  | 31316  | 2.88E-52 | 0.89 |
| 28613 | 2060   | 2455   | 2.59E-54 | 0.84 |
| 28613 | 16702  | 17415  | 3.14E-15 | 0.82 |
| 28613 | 17808  | 18623  | 2.66E-54 | 0.93 |
| 28613 | 22012  | 22455  | 4.18E-33 | 0.91 |
| 28613 | 23731  | 24061  | 4.36E-28 | 0.93 |
| 28613 | 30995  | 31530  | 1.40E-32 | 0.97 |
| 28613 | 35856  | 36486  | 1.08E-25 | 0.8  |
| 28613 | 51952  | 52998  | 7.25E-40 | 0.83 |
| 28613 | 53945  | 54436  | 1.22E-10 | 0.75 |
| 28613 | 75976  | 76829  | 4.39E-15 | 0.87 |
| 28614 | 9557   | 9821   | 5.27E-11 | 0.89 |
| 28614 | 20288  | 20560  | 1.96E-04 | 0.78 |
| 28614 | 26126  | 26477  | 1.86E-08 | 0.92 |
| 28615 | 1594   | 2210   | 2.77E-11 | 0.82 |
| 28615 | 10062  | 10317  | 1.17E-17 | 0.79 |
| 28616 | 13659  | 14008  | 3.31E-17 | 0.91 |
| 28616 | 30549  | 30870  | 2.33E-14 | 0.87 |
| 28616 | 50144  | 50995  | 3.86E-33 | 0.84 |
| 28616 | 52982  | 54444  | 1.13E-51 | 0.78 |
| 28616 | 69660  | 70347  | 1.06E-50 | 0.88 |
| 28616 | 72289  | 72773  | 5.93E-38 | 0.87 |
| 28616 | 72977  | 73225  | 9.38E-17 | 0.91 |
| 28616 | 73445  | 73769  | 2.61E-13 | 0.72 |

|       |        |        |           |      |
|-------|--------|--------|-----------|------|
| 28616 | 76776  | 77092  | 2.27E-26  | 0.89 |
| 28617 | 6652   | 7113   | 3.45E-54  | 0.94 |
| 28617 | 7982   | 8429   | 2.51E-21  | 0.63 |
| 28617 | 13363  | 14219  | 1.60E-26  | 0.66 |
| 28617 | 14716  | 15136  | 1.42E-32  | 0.88 |
| 28617 | 26872  | 27420  | 1.15E-24  | 0.9  |
| 28617 | 33290  | 33575  | 7.84E-58  | 0.97 |
| 28617 | 33840  | 34056  | 5.16E-54  | 0.95 |
| 28617 | 34374  | 34628  | 3.16E-35  | 0.96 |
| 28617 | 34846  | 35858  | 1.81E-122 | 0.91 |
| 28617 | 73907  | 74198  | 4.21E-29  | 0.86 |
| 28623 | 6141   | 6802   | 3.63E-29  | 0.88 |
| 28623 | 7008   | 7223   | 3.36E-27  | 0.98 |
| 28623 | 7602   | 8634   | 7.96E-47  | 0.87 |
| 28623 | 9600   | 9904   | 8.70E-22  | 0.73 |
| 28623 | 14411  | 15357  | 1.31E-60  | 0.94 |
| 28623 | 24553  | 25154  | 1.03E-21  | 0.82 |
| 28623 | 25387  | 26715  | 2.89E-33  | 0.84 |
| 28623 | 38084  | 39109  | 1.60E-50  | 0.74 |
| 28623 | 76824  | 77548  | 5.91E-19  | 0.67 |
| 28623 | 112059 | 112526 | 7.26E-50  | 0.87 |
| 28623 | 123223 | 124507 | 6.10E-55  | 0.89 |
| 28623 | 128560 | 130152 | 4.01E-126 | 0.84 |
| 28623 | 133837 | 134450 | 1.39E-20  | 0.78 |
| 28627 | 347    | 821    | 1.91E-03  | 0.81 |
| 28629 | 22647  | 23074  | 5.79E-29  | 0.81 |
| 28629 | 23359  | 24061  | 7.81E-52  | 0.89 |
| 28629 | 56627  | 56949  | 1.47E-12  | 0.64 |
| 28629 | 57156  | 57365  | 8.77E-47  | 0.88 |
| 28629 | 57657  | 58977  | 2.08E-80  | 0.9  |
| 28629 | 66567  | 66817  | 2.25E-20  | 0.87 |
| 28629 | 67144  | 67376  | 1.08E-15  | 0.83 |
| 28629 | 68303  | 68531  | 4.14E-32  | 0.75 |
| 28629 | 78298  | 79083  | 7.74E-63  | 0.81 |
| 28629 | 119201 | 119658 | 6.08E-74  | 0.94 |
| 28629 | 137736 | 138111 | 6.56E-28  | 0.82 |
| 28629 | 140881 | 141523 | 2.35E-39  | 0.62 |
| 28629 | 142056 | 142526 | 4.12E-20  | 0.93 |
| 28629 | 163581 | 163831 | 6.62E-54  | 0.88 |
| 28635 | 8964   | 9257   | 5.55E-14  | 0.6  |
| 28636 | 1945   | 2265   | 2.64E-07  | 0.93 |
| 28636 | 2529   | 3000   | 1.49E-09  | 0.73 |
| 28637 | 7428   | 7714   | 5.21E-31  | 0.92 |
| 28637 | 21174  | 22372  | 5.50E-89  | 0.85 |
| 28637 | 34965  | 35587  | 2.83E-35  | 0.75 |
| 28637 | 41483  | 42500  | 1.48E-65  | 0.94 |
| 28637 | 75020  | 75362  | 6.67E-19  | 0.64 |
| 28637 | 76175  | 76669  | 8.38E-22  | 0.8  |
| 28639 | 11141  | 11558  | 7.55E-07  | 0.82 |
| 28639 | 15477  | 15922  | 5.08E-09  | 0.78 |
| 28641 | 16409  | 17293  | 3.82E-44  | 0.6  |
| 28641 | 19535  | 20139  | 4.60E-58  | 0.96 |
| 28641 | 26045  | 26567  | 3.71E-41  | 0.86 |

|       |        |        |           |      |
|-------|--------|--------|-----------|------|
| 28641 | 27005  | 27741  | 8.43E-45  | 0.92 |
| 28641 | 40910  | 43554  | 2.74E-145 | 0.83 |
| 28641 | 50538  | 50745  | 1.06E-12  | 0.81 |
| 28644 | 840    | 1142   | 1.92E-23  | 0.69 |
| 28644 | 2488   | 2892   | 2.44E-11  | 0.72 |
| 28644 | 30751  | 31093  | 4.77E-20  | 0.85 |
| 28644 | 42355  | 42759  | 4.51E-30  | 0.62 |
| 28644 | 43732  | 44040  | 1.82E-11  | 0.66 |
| 28644 | 49773  | 50023  | 3.75E-12  | 0.83 |
| 28644 | 50335  | 50829  | 3.79E-32  | 0.7  |
| 28644 | 55408  | 55756  | 1.60E-22  | 0.82 |
| 28644 | 57746  | 58380  | 1.67E-15  | 0.86 |
| 28644 | 115244 | 115458 | 2.19E-27  | 0.77 |
| 28644 | 132989 | 133439 | 7.32E-35  | 0.85 |
| 28644 | 147300 | 148120 | 7.32E-48  | 0.9  |
| 28644 | 148921 | 150350 | 2.30E-49  | 0.91 |
| 28644 | 166711 | 166995 | 8.40E-61  | 0.94 |
| 28644 | 168748 | 170285 | 9.31E-76  | 0.84 |
| 28644 | 174834 | 175252 | 3.89E-15  | 0.87 |
| 28644 | 188293 | 188682 | 1.07E-19  | 0.61 |
| 28644 | 195027 | 195627 | 2.87E-24  | 0.67 |
| 28644 | 198818 | 200048 | 2.12E-88  | 0.91 |
| 28644 | 200809 | 201599 | 3.71E-22  | 0.82 |
| 28644 | 277969 | 278283 | 7.08E-31  | 0.97 |
| 28644 | 278519 | 278744 | 2.04E-11  | 0.62 |
| 28644 | 295180 | 295584 | 2.46E-13  | 0.79 |
| 28644 | 296603 | 296881 | 8.38E-20  | 0.83 |
| 28644 | 301692 | 302219 | 6.11E-25  | 0.9  |
| 28644 | 309492 | 310224 | 3.11E-28  | 0.83 |
| 28644 | 316508 | 317353 | 2.60E-46  | 0.81 |
| 28644 | 328312 | 328760 | 1.15E-14  | 0.9  |
| 28645 | 24861  | 25188  | 4.64E-06  | 0.82 |
| 28645 | 26797  | 27289  | 4.08E-07  | 0.93 |
| 28649 | 2163   | 2490   | 7.34E-15  | 0.89 |
| 28649 | 30890  | 31872  | 2.05E-43  | 0.83 |
| 28649 | 32117  | 32590  | 6.36E-13  | 0.67 |
| 28649 | 55787  | 57641  | 3.16E-87  | 0.81 |
| 28649 | 76075  | 76647  | 2.37E-14  | 0.88 |
| 28650 | 9663   | 9935   | 7.26E-04  | 0.79 |
| 28650 | 20478  | 21053  | 1.68E-44  | 0.78 |
| 28650 | 21533  | 21780  | 2.10E-48  | 0.87 |
| 28650 | 36223  | 36869  | 1.13E-18  | 0.94 |
| 28650 | 57490  | 58931  | 9.14E-86  | 0.7  |
| 28653 | 5385   | 5813   | 1.74E-15  | 0.81 |
| 28657 | 10082  | 10608  | 5.07E-24  | 0.83 |
| 28657 | 11346  | 12114  | 1.38E-41  | 0.73 |
| 28657 | 76717  | 78602  | 6.61E-102 | 0.89 |
| 28657 | 98800  | 99796  | 1.70E-34  | 0.88 |
| 28657 | 134798 | 136134 | 9.10E-71  | 0.81 |
| 28657 | 136370 | 138213 | 2.25E-125 | 0.9  |
| 28659 | 940    | 1362   | 3.17E-23  | 0.92 |
| 28659 | 3133   | 3987   | 9.37E-36  | 0.83 |
| 28659 | 16977  | 17596  | 7.15E-71  | 0.85 |

|       |        |        |           |      |
|-------|--------|--------|-----------|------|
| 28659 | 33676  | 33933  | 4.77E-12  | 0.64 |
| 28660 | 59808  | 60045  | 2.99E-15  | 0.65 |
| 28660 | 66239  | 67761  | 7.31E-96  | 0.69 |
| 28660 | 83145  | 87465  | 3.51E-232 | 0.9  |
| 28660 | 91280  | 92033  | 7.00E-170 | 0.92 |
| 28660 | 127850 | 128416 | 7.38E-62  | 0.82 |
| 28660 | 130183 | 130671 | 6.31E-25  | 0.82 |
| 28660 | 148382 | 148772 | 1.61E-16  | 0.89 |
| 28660 | 157549 | 157774 | 1.08E-15  | 0.83 |
| 28660 | 159601 | 160037 | 7.11E-20  | 0.82 |
| 28660 | 160542 | 161196 | 4.07E-15  | 0.63 |
| 28660 | 174764 | 175006 | 3.68E-33  | 0.91 |
| 28661 | 3431   | 4032   | 4.01E-12  | 0.96 |
| 28661 | 12516  | 13166  | 6.61E-16  | 0.75 |
| 28661 | 22633  | 23470  | 7.80E-19  | 0.91 |
| 28663 | 1943   | 2192   | 2.33E-38  | 0.74 |
| 28663 | 15506  | 15806  | 4.30E-27  | 0.93 |
| 28663 | 16781  | 18818  | 1.82E-104 | 0.64 |
| 28663 | 19205  | 19503  | 3.00E-16  | 0.83 |
| 28664 | 13936  | 14331  | 6.56E-88  | 0.91 |
| 28664 | 15784  | 16544  | 1.95E-40  | 0.9  |
| 28664 | 39841  | 40417  | 1.66E-80  | 0.95 |
| 28664 | 48823  | 49403  | 6.41E-36  | 0.71 |
| 28664 | 52203  | 52404  | 5.26E-13  | 0.71 |
| 28664 | 53018  | 53669  | 1.71E-29  | 0.62 |
| 28664 | 58363  | 58613  | 7.26E-11  | 0.71 |
| 28664 | 91502  | 91719  | 5.75E-24  | 0.91 |
| 28664 | 93836  | 94256  | 2.14E-22  | 0.91 |
| 28664 | 97925  | 98749  | 3.50E-15  | 0.6  |
| 28667 | 62417  | 62845  | 5.76E-06  | 0.93 |
| 28670 | 44105  | 44813  | 1.28E-70  | 0.85 |
| 28670 | 45054  | 46035  | 4.08E-39  | 0.78 |
| 28672 | 7957   | 8478   | 1.24E-21  | 0.66 |
| 28673 | 997    | 1254   | 6.45E-06  | 1    |
| 28674 | 240    | 1406   | 8.83E-62  | 0.86 |
| 28677 | 40084  | 40896  | 4.17E-31  | 0.83 |
| 28680 | 18986  | 19320  | 6.33E-19  | 1    |
| 28681 | 133    | 440    | 1.85E-05  | 1    |
| 28684 | 19793  | 20133  | 2.56E-13  | 0.79 |
| 28684 | 22687  | 23938  | 9.81E-54  | 0.87 |
| 28684 | 25788  | 27538  | 1.28E-48  | 0.75 |
| 28691 | 586    | 1252   | 1.38E-127 | 0.93 |
| 28691 | 7221   | 7506   | 2.02E-06  | 0.72 |
| 28691 | 15068  | 15388  | 3.40E-16  | 0.87 |
| 28693 | 5043   | 5367   | 1.97E-13  | 0.87 |
| 28693 | 6332   | 6743   | 5.52E-19  | 0.79 |
| 28693 | 22489  | 22975  | 4.17E-17  | 0.64 |
| 28693 | 32766  | 33107  | 4.52E-30  | 0.82 |
| 28693 | 42659  | 43153  | 2.47E-44  | 0.85 |
| 28694 | 6088   | 6865   | 4.65E-12  | 0.79 |
| 28694 | 13655  | 15169  | 9.59E-61  | 0.81 |
| 28694 | 37843  | 38151  | 1.04E-25  | 0.92 |
| 28694 | 38383  | 39870  | 5.38E-55  | 0.83 |

|       |        |        |           |      |
|-------|--------|--------|-----------|------|
| 28694 | 44419  | 44903  | 1.67E-18  | 0.78 |
| 28694 | 52522  | 54116  | 6.20E-168 | 0.71 |
| 28694 | 101665 | 101986 | 8.14E-34  | 0.73 |
| 28694 | 106562 | 107318 | 1.03E-27  | 0.81 |
| 28694 | 107522 | 108005 | 9.31E-13  | 0.86 |
| 28694 | 142348 | 142826 | 2.80E-23  | 0.79 |
| 28694 | 150432 | 151596 | 1.54E-56  | 0.7  |
| 28694 | 168717 | 169253 | 2.07E-34  | 0.83 |
| 28694 | 177282 | 178086 | 2.61E-30  | 0.62 |
| 28694 | 193628 | 194707 | 2.02E-67  | 0.76 |
| 28694 | 196032 | 196660 | 8.24E-26  | 0.8  |
| 28694 | 203487 | 204139 | 6.37E-48  | 0.93 |
| 28694 | 209202 | 211066 | 7.44E-74  | 0.81 |
| 28694 | 213995 | 214246 | 7.00E-30  | 0.86 |
| 28694 | 215021 | 215840 | 6.65E-31  | 0.8  |
| 28694 | 229853 | 230190 | 5.21E-15  | 0.91 |
| 28694 | 300334 | 300699 | 1.83E-09  | 0.83 |
| 28698 | 21982  | 22415  | 5.20E-13  | 0.81 |
| 28698 | 24029  | 25043  | 7.44E-139 | 0.92 |
| 28698 | 26481  | 27733  | 2.25E-71  | 0.85 |
| 28699 | 15042  | 15356  | 2.86E-05  | 0.95 |
| 28700 | 4257   | 4622   | 5.01E-06  | 0.94 |
| 28704 | 8046   | 8551   | 3.30E-19  | 0.94 |
| 28704 | 21074  | 21574  | 8.65E-21  | 0.85 |
| 28705 | 11352  | 12099  | 7.10E-34  | 0.75 |
| 28707 | 57169  | 57568  | 1.55E-08  | 0.88 |
| 28707 | 58517  | 58765  | 1.03E-12  | 0.8  |
| 28707 | 172429 | 172732 | 6.88E-09  | 1    |
| 28708 | 50026  | 50825  | 5.31E-124 | 0.9  |
| 28708 | 64290  | 66575  | 1.10E-65  | 0.74 |
| 28713 | 16133  | 17096  | 6.15E-21  | 0.77 |
| 28713 | 89754  | 90048  | 1.42E-16  | 0.94 |
| 28713 | 126197 | 126482 | 1.10E-10  | 0.82 |
| 28717 | 10248  | 11191  | 8.82E-21  | 0.69 |
| 28718 | 3528   | 4536   | 8.10E-70  | 0.81 |
| 28718 | 19606  | 20513  | 5.06E-33  | 0.74 |
| 28718 | 25527  | 25949  | 6.05E-07  | 0.72 |
| 28720 | 3529   | 3749   | 1.14E-11  | 0.81 |
| 28724 | 1560   | 1760   | 2.93E-07  | 0.9  |
| 28725 | 72247  | 72501  | 1.97E-10  | 0.98 |
| 28725 | 72803  | 73155  | 1.79E-32  | 0.88 |
| 28725 | 74331  | 75297  | 1.64E-27  | 0.86 |
| 28725 | 75747  | 75964  | 2.34E-10  | 0.66 |
| 28725 | 81173  | 81753  | 6.23E-31  | 0.95 |
| 28725 | 86258  | 86464  | 3.90E-24  | 0.96 |
| 28725 | 99938  | 100797 | 6.39E-147 | 0.94 |
| 28725 | 103416 | 104828 | 3.28E-33  | 0.64 |
| 28725 | 105184 | 105417 | 7.37E-14  | 0.89 |
| 28725 | 117468 | 117733 | 5.93E-14  | 0.81 |
| 28725 | 123954 | 124327 | 5.63E-35  | 0.89 |
| 28725 | 125694 | 125987 | 1.98E-23  | 0.84 |
| 28725 | 134333 | 135097 | 3.74E-38  | 0.84 |
| 28725 | 135682 | 136008 | 4.57E-38  | 0.88 |

|       |        |        |           |      |
|-------|--------|--------|-----------|------|
| 28725 | 136880 | 137437 | 1.50E-22  | 0.84 |
| 28725 | 138608 | 139271 | 3.39E-25  | 0.77 |
| 28725 | 142879 | 143145 | 5.31E-21  | 0.81 |
| 28725 | 170087 | 171613 | 1.09E-58  | 0.67 |
| 28725 | 172640 | 174577 | 1.27E-119 | 0.9  |
| 28726 | 15521  | 17323  | 4.08E-123 | 0.87 |
| 28729 | 11563  | 11929  | 1.03E-07  | 0.87 |
| 28732 | 18742  | 19045  | 1.60E-14  | 0.78 |
| 28733 | 6495   | 7094   | 1.84E-05  | 0.98 |
| 28733 | 6810   | 7354   | 6.22E-09  | 0.97 |
| 28735 | 10921  | 11239  | 7.89E-05  | 0.87 |
| 28738 | 16399  | 16850  | 1.15E-06  | 0.78 |
| 28738 | 31603  | 32368  | 4.09E-07  | 0.87 |
| 28738 | 53572  | 53907  | 1.52E-33  | 0.89 |
| 28738 | 64758  | 65656  | 2.37E-28  | 0.98 |
| 28738 | 69736  | 71328  | 2.32E-58  | 0.67 |
| 28738 | 98688  | 98905  | 1.45E-09  | 0.85 |
| 28738 | 99385  | 99713  | 5.86E-10  | 0.82 |
| 28738 | 120815 | 121531 | 6.23E-11  | 0.87 |
| 28738 | 121859 | 122228 | 4.97E-23  | 0.74 |
| 28738 | 122446 | 123145 | 6.97E-18  | 0.76 |
| 28738 | 154962 | 155551 | 9.14E-11  | 0.88 |
| 28738 | 163895 | 164112 | 1.13E-03  | 1    |
| 28738 | 180414 | 180913 | 1.04E-27  | 0.89 |
| 28738 | 181176 | 181566 | 6.62E-29  | 0.94 |
| 28738 | 182518 | 182762 | 5.26E-18  | 0.96 |
| 28738 | 186406 | 187341 | 3.46E-30  | 0.95 |
| 28738 | 196904 | 198143 | 3.19E-32  | 0.81 |
| 28747 | 28456  | 29156  | 4.05E-41  | 0.91 |
| 28747 | 29887  | 30385  | 2.13E-13  | 0.81 |
| 28748 | 4850   | 5538   | 6.18E-21  | 0.81 |
| 28748 | 5811   | 6727   | 9.83E-13  | 0.69 |
| 28748 | 8974   | 9228   | 5.68E-09  | 0.84 |
| 28748 | 41635  | 41884  | 2.83E-08  | 0.78 |
| 28748 | 45147  | 45861  | 4.45E-13  | 0.75 |
| 28748 | 47115  | 47611  | 5.91E-30  | 0.6  |
| 28748 | 54562  | 54801  | 8.51E-15  | 0.84 |
| 28748 | 69398  | 69899  | 4.86E-46  | 0.82 |
| 28748 | 70210  | 71725  | 9.71E-145 | 0.87 |
| 28748 | 74067  | 74997  | 5.60E-85  | 0.93 |
| 28748 | 76111  | 76407  | 4.91E-33  | 0.94 |
| 28748 | 87770  | 88167  | 7.48E-15  | 0.81 |
| 28748 | 88588  | 89291  | 1.94E-53  | 0.83 |
| 28748 | 91116  | 92422  | 2.26E-42  | 0.68 |
| 28748 | 95417  | 97284  | 2.09E-65  | 0.79 |
| 28748 | 98463  | 98709  | 4.21E-09  | 0.89 |
| 28749 | 8036   | 8571   | 5.18E-15  | 0.77 |
| 28752 | 2494   | 3062   | 8.30E-15  | 0.75 |
| 28752 | 14679  | 15904  | 3.17E-80  | 0.86 |
| 28752 | 20863  | 21168  | 2.85E-20  | 0.91 |
| 28752 | 31240  | 32066  | 7.13E-35  | 0.75 |
| 28752 | 32299  | 32944  | 1.83E-23  | 0.74 |
| 28752 | 47064  | 47730  | 1.99E-14  | 0.79 |

|       |        |        |           |      |
|-------|--------|--------|-----------|------|
| 28752 | 60787  | 61315  | 2.58E-40  | 0.85 |
| 28752 | 61577  | 61860  | 3.71E-45  | 0.91 |
| 28752 | 67194  | 67610  | 5.02E-34  | 0.94 |
| 28752 | 90646  | 90939  | 6.96E-13  | 0.88 |
| 28752 | 110460 | 110969 | 3.28E-18  | 0.63 |
| 28752 | 111847 | 112777 | 2.78E-118 | 0.9  |
| 28752 | 156747 | 157038 | 1.09E-09  | 0.78 |
| 28752 | 170296 | 171570 | 2.07E-45  | 0.65 |
| 28752 | 186392 | 186720 | 3.75E-19  | 0.85 |
| 28754 | 4740   | 4962   | 1.70E-07  | 0.86 |
| 28754 | 20893  | 21163  | 2.02E-04  | 0.8  |
| 28754 | 22129  | 22332  | 1.15E-08  | 0.82 |
| 28762 | 446    | 712    | 7.67E-08  | 1    |
| 28762 | 644    | 863    | 2.83E-03  | 1    |
| 28762 | 1513   | 1785   | 7.93E-04  | 0.83 |
| 28764 | 11896  | 12194  | 6.16E-09  | 0.96 |
| 28764 | 18174  | 18557  | 9.04E-12  | 0.65 |
| 28764 | 22740  | 23176  | 1.85E-12  | 0.97 |
| 28772 | 5798   | 6025   | 4.45E-12  | 0.79 |
| 28772 | 10886  | 11300  | 1.83E-17  | 0.76 |
| 28773 | 20146  | 20493  | 5.74E-08  | 0.92 |
| 28778 | 13801  | 14151  | 3.39E-03  | 0.78 |
| 28779 | 1086   | 1763   | 6.43E-21  | 0.62 |
| 28779 | 9537   | 9916   | 9.62E-25  | 0.74 |
| 28779 | 13702  | 14441  | 9.52E-07  | 0.88 |
| 28779 | 14985  | 15279  | 8.79E-18  | 0.79 |
| 28779 | 15662  | 15887  | 4.74E-20  | 0.87 |
| 28779 | 18539  | 19004  | 1.98E-31  | 0.87 |
| 28779 | 19404  | 19883  | 1.23E-50  | 0.84 |
| 28779 | 20096  | 21912  | 1.74E-50  | 0.64 |
| 28779 | 28421  | 28905  | 8.67E-12  | 0.63 |
| 28779 | 36896  | 37402  | 5.10E-32  | 0.84 |
| 28779 | 39088  | 39441  | 7.02E-24  | 0.86 |
| 28779 | 70156  | 70398  | 1.71E-26  | 0.89 |
| 28781 | 16583  | 16820  | 1.76E-34  | 0.85 |
| 28781 | 17027  | 17683  | 2.06E-27  | 0.86 |
| 28783 | 5701   | 6302   | 1.16E-08  | 0.95 |
| 28784 | 23390  | 23862  | 6.52E-06  | 0.8  |
| 28784 | 23707  | 24133  | 9.36E-11  | 0.87 |
| 28784 | 29607  | 29897  | 6.55E-10  | 0.96 |
| 28787 | 20378  | 20711  | 4.44E-06  | 0.9  |
| 28787 | 20534  | 20777  | 1.53E-04  | 0.85 |
| 28795 | 293    | 798    | 2.11E-15  | 0.95 |
| 28799 | 11630  | 11868  | 2.43E-05  | 0.9  |
| 28802 | 44619  | 45037  | 1.32E-28  | 0.91 |
| 28802 | 45524  | 46662  | 6.58E-53  | 0.87 |
| 28802 | 47397  | 47920  | 3.76E-54  | 0.96 |
| 28802 | 49126  | 49601  | 6.58E-28  | 0.89 |
| 28802 | 69658  | 70084  | 2.53E-59  | 0.94 |
| 28802 | 70375  | 70692  | 1.54E-15  | 0.78 |
| 28802 | 71980  | 73348  | 1.84E-61  | 0.8  |
| 28802 | 75190  | 75948  | 7.52E-12  | 0.81 |
| 28805 | 753    | 1016   | 1.56E-12  | 0.78 |



|       |        |        |           |      |
|-------|--------|--------|-----------|------|
| 28805 | 1016   | 1343   | 4.06E-06  | 0.84 |
| 28805 | 9953   | 10551  | 4.37E-14  | 0.96 |
| 28806 | 6560   | 8906   | 1.36E-159 | 0.9  |
| 28806 | 9132   | 9527   | 4.65E-21  | 0.81 |
| 28806 | 28253  | 29047  | 2.67E-46  | 0.73 |
| 28806 | 32435  | 32723  | 4.48E-47  | 0.82 |
| 28806 | 33048  | 33261  | 5.32E-25  | 0.79 |
| 28806 | 45847  | 46292  | 4.42E-13  | 0.66 |
| 28806 | 46995  | 47782  | 9.10E-27  | 0.79 |
| 28814 | 20024  | 20590  | 1.89E-21  | 0.94 |
| 28814 | 30239  | 30690  | 1.46E-11  | 0.92 |
| 28814 | 31858  | 32115  | 1.50E-10  | 0.92 |
| 28819 | 14709  | 14982  | 1.69E-04  | 0.79 |
| 28822 | 144    | 703    | 2.76E-32  | 0.85 |
| 28822 | 4114   | 4712   | 7.72E-33  | 0.8  |
| 28822 | 7628   | 8928   | 2.58E-54  | 0.68 |
| 28822 | 9629   | 10041  | 7.33E-19  | 0.65 |
| 28823 | 5013   | 6314   | 1.35E-36  | 0.76 |
| 28827 | 9045   | 9647   | 1.06E-30  | 0.87 |
| 28827 | 22575  | 23389  | 2.11E-32  | 0.84 |
| 28827 | 23643  | 24006  | 6.42E-24  | 0.85 |
| 28827 | 35243  | 35456  | 2.56E-27  | 0.89 |
| 28827 | 36300  | 37083  | 9.29E-37  | 0.81 |
| 28827 | 45068  | 45655  | 2.53E-14  | 0.74 |
| 28827 | 50746  | 51390  | 1.73E-27  | 0.89 |
| 28827 | 52520  | 53431  | 7.17E-28  | 0.83 |
| 28827 | 55088  | 55620  | 4.87E-73  | 0.94 |
| 28828 | 79216  | 79462  | 7.36E-07  | 0.88 |
| 28829 | 2238   | 2584   | 7.58E-19  | 0.85 |
| 28830 | 23021  | 23419  | 1.69E-32  | 0.76 |
| 28830 | 50296  | 51656  | 1.82E-82  | 0.9  |
| 28830 | 59187  | 59700  | 2.13E-20  | 0.73 |
| 28830 | 61488  | 63660  | 1.56E-223 | 0.74 |
| 28830 | 102480 | 103039 | 5.25E-19  | 0.8  |
| 28831 | 1150   | 1421   | 2.29E-06  | 0.9  |
| 28833 | 11335  | 12793  | 2.68E-102 | 0.93 |
| 28833 | 14277  | 14640  | 3.45E-08  | 0.8  |
| 28833 | 16990  | 17831  | 6.55E-32  | 0.78 |
| 28833 | 19042  | 19385  | 2.31E-22  | 0.88 |
| 28833 | 25468  | 26421  | 1.92E-46  | 0.82 |
| 28833 | 59261  | 59693  | 2.01E-05  | 0.82 |
| 28837 | 8560   | 9320   | 4.58E-20  | 0.84 |
| 28837 | 16544  | 17160  | 1.09E-20  | 0.67 |
| 28838 | 11587  | 11837  | 8.42E-14  | 0.81 |
| 28838 | 54948  | 55186  | 1.74E-50  | 0.9  |
| 28838 | 87930  | 88391  | 1.10E-10  | 0.64 |
| 28842 | 10977  | 11392  | 3.57E-35  | 0.95 |
| 28842 | 11605  | 12247  | 5.18E-71  | 0.89 |
| 28842 | 26604  | 27508  | 2.29E-29  | 0.77 |
| 28842 | 40901  | 41319  | 5.43E-19  | 0.68 |
| 28842 | 42691  | 43114  | 1.60E-09  | 0.73 |
| 28842 | 50610  | 51254  | 9.95E-71  | 0.94 |
| 28842 | 54299  | 54861  | 1.53E-32  | 0.91 |

|       |        |        |           |      |
|-------|--------|--------|-----------|------|
| 28842 | 70793  | 71184  | 9.27E-23  | 0.91 |
| 28842 | 90209  | 90466  | 3.50E-24  | 0.9  |
| 28842 | 90817  | 91025  | 1.88E-20  | 0.87 |
| 28842 | 97307  | 97962  | 3.59E-100 | 0.81 |
| 28842 | 110517 | 111584 | 4.03E-19  | 0.72 |
| 28842 | 112323 | 112898 | 9.39E-16  | 0.86 |
| 28842 | 115814 | 116057 | 3.26E-14  | 0.85 |
| 28842 | 116895 | 117330 | 1.68E-28  | 0.91 |
| 28842 | 123390 | 123908 | 5.40E-15  | 0.87 |
| 28842 | 158661 | 158915 | 9.35E-19  | 0.66 |
| 28842 | 165884 | 166510 | 4.95E-19  | 0.8  |
| 28842 | 174579 | 175093 | 4.74E-45  | 0.85 |
| 28842 | 180343 | 180859 | 1.82E-31  | 0.81 |
| 28842 | 185426 | 186623 | 1.53E-25  | 0.61 |
| 28842 | 187640 | 189124 | 1.17E-28  | 0.8  |
| 28842 | 194883 | 195803 | 2.54E-71  | 0.86 |
| 28842 | 199082 | 199517 | 7.15E-21  | 0.77 |
| 28842 | 200377 | 201081 | 1.25E-42  | 0.8  |
| 28842 | 217414 | 217736 | 1.02E-25  | 0.9  |
| 28842 | 223451 | 224556 | 7.31E-74  | 0.9  |
| 28842 | 237484 | 237981 | 5.72E-58  | 0.92 |
| 28842 | 238187 | 238444 | 3.45E-42  | 0.94 |
| 28842 | 256328 | 256819 | 1.62E-11  | 0.77 |
| 28842 | 257456 | 257720 | 7.07E-24  | 0.9  |
| 28842 | 258054 | 258592 | 1.22E-57  | 0.78 |
| 28842 | 267690 | 268124 | 1.33E-08  | 0.81 |
| 28842 | 306761 | 309886 | 2.90E-93  | 0.71 |
| 28842 | 310186 | 310435 | 4.79E-25  | 0.79 |
| 28842 | 310670 | 311263 | 3.89E-42  | 0.91 |
| 28842 | 311874 | 312281 | 3.99E-19  | 0.85 |
| 28842 | 312756 | 314585 | 3.05E-145 | 0.88 |
| 28842 | 315153 | 316245 | 1.67E-33  | 0.82 |
| 28842 | 317240 | 317836 | 4.65E-43  | 0.87 |
| 28842 | 320673 | 321183 | 9.09E-16  | 0.79 |
| 28842 | 323514 | 323846 | 2.73E-19  | 0.82 |
| 28842 | 326042 | 326827 | 3.35E-35  | 0.67 |
| 28842 | 329638 | 331311 | 2.09E-90  | 0.87 |
| 28842 | 333943 | 334432 | 6.79E-11  | 0.78 |
| 28842 | 338350 | 338572 | 1.11E-14  | 0.65 |
| 28842 | 393172 | 393466 | 5.52E-10  | 0.75 |
| 28842 | 394644 | 395045 | 3.06E-11  | 0.78 |
| 28842 | 394719 | 395440 | 2.36E-21  | 0.78 |
| 28842 | 426714 | 427144 | 8.04E-10  | 0.81 |
| 28842 | 433563 | 433965 | 4.15E-22  | 0.9  |
| 28842 | 440315 | 441495 | 4.52E-78  | 0.86 |
| 28842 | 445594 | 446531 | 1.50E-47  | 0.81 |
| 28842 | 449343 | 450066 | 3.66E-19  | 0.76 |
| 28842 | 456106 | 456644 | 6.16E-04  | 0.87 |
| 28842 | 460691 | 460934 | 2.09E-08  | 0.69 |
| 28842 | 479270 | 479510 | 6.73E-17  | 0.96 |
| 28842 | 493118 | 493556 | 1.24E-29  | 0.73 |
| 28842 | 503740 | 504733 | 5.23E-14  | 0.87 |
| 28842 | 516706 | 517188 | 4.57E-18  | 0.79 |

|       |        |        |            |      |
|-------|--------|--------|------------|------|
| 28842 | 526518 | 527000 | 3.57E-32   | 0.72 |
| 28842 | 533860 | 534317 | 8.73E-32   | 0.88 |
| 28842 | 536029 | 536313 | 5.43E-23   | 0.85 |
| 28842 | 536675 | 537083 | 4.27E-27   | 0.84 |
| 28842 | 537447 | 538016 | 1.11E-50   | 0.93 |
| 28842 | 538279 | 538626 | 1.69E-17   | 0.74 |
| 28842 | 542534 | 543173 | 1.68E-52   | 0.89 |
| 28842 | 544337 | 545506 | 3.55E-43   | 0.83 |
| 28842 | 549964 | 550346 | 7.68E-18   | 0.89 |
| 28856 | 70262  | 70608  | 4.29E-16   | 0.89 |
| 28859 | 82237  | 83838  | 2.43E-98   | 0.87 |
| 28859 | 105711 | 105986 | 1.77E-39   | 0.97 |
| 28859 | 137059 | 137354 | 7.18E-17   | 0.74 |
| 28863 | 19960  | 20226  | 7.92E-37   | 0.97 |
| 28863 | 21493  | 21994  | 1.59E-22   | 0.87 |
| 28863 | 49487  | 49791  | 7.99E-11   | 0.73 |
| 28863 | 62220  | 62765  | 6.13E-63   | 0.9  |
| 28863 | 64990  | 65482  | 5.82E-58   | 0.91 |
| 28863 | 70692  | 71324  | 5.66E-83   | 0.93 |
| 28863 | 80554  | 82733  | 6.27E-180  | 0.8  |
| 28865 | 8769   | 9154   | 4.28E-16   | 0.74 |
| 28872 | 139    | 1215   | 3.14E-62   | 0.87 |
| 28872 | 27344  | 27732  | 5.98E-14   | 0.84 |
| 28872 | 54927  | 55591  | 8.61E-27   | 0.83 |
| 28872 | 55984  | 56626  | 8.12E-21   | 0.81 |
| 28872 | 73401  | 74310  | 2.60E-46   | 0.83 |
| 28872 | 74757  | 75607  | 1.45E-46   | 0.67 |
| 28872 | 100624 | 102178 | 4.00E-144  | 0.89 |
| 28872 | 102627 | 102914 | 2.04E-27   | 0.79 |
| 28872 | 103544 | 104382 | 8.32E-42   | 0.69 |
| 28873 | 30121  | 30546  | 9.01E-07   | 0.85 |
| 28882 | 6029   | 6510   | 5.32E-06   | 0.87 |
| 28882 | 12225  | 12484  | 3.35E-04   | 0.85 |
| 28883 | 25539  | 25983  | 9.77E-15   | 0.83 |
| 28883 | 41744  | 42042  | 8.33E-14   | 0.88 |
| 28883 | 67932  | 68322  | 2.16E-14   | 0.88 |
| 28883 | 72372  | 73264  | 6.13E-47   | 0.84 |
| 28883 | 74389  | 74668  | 2.46E-19   | 0.84 |
| 28883 | 81142  | 82535  | 6.86E-90   | 0.65 |
| 28883 | 103366 | 103606 | 2.04E-29   | 0.9  |
| 28883 | 124833 | 125113 | 3.39E-11   | 0.87 |
| 28883 | 140222 | 140671 | 1.23E-21   | 0.74 |
| 28883 | 144049 | 144438 | 6.01E-20   | 0.88 |
| 28883 | 145626 | 145872 | 7.99E-09   | 0.77 |
| 28883 | 147142 | 147634 | 2.55E-34   | 0.77 |
| 28883 | 171148 | 171723 | 6.07E-45   | 0.73 |
| 28883 | 211115 | 211409 | 5.70E-18   | 0.83 |
| 28883 | 216229 | 217184 | 5.80E-28   | 0.77 |
| 28883 | 220336 | 221141 | 6.33E-30   | 0.64 |
| 28883 | 225425 | 229224 | 4.9406565I | 0.89 |
| 28884 | 46387  | 46648  | 9.61E-03   | 0.71 |
| 28884 | 60736  | 61115  | 1.30E-24   | 0.94 |
| 28884 | 80744  | 80956  | 3.96E-09   | 0.78 |

|       |        |        |          |      |
|-------|--------|--------|----------|------|
| 28884 | 99017  | 99430  | 2.44E-04 | 0.9  |
| 28884 | 105247 | 105583 | 1.36E-13 | 0.83 |
| 28884 | 121070 | 121687 | 2.06E-11 | 0.85 |
| 28884 | 124701 | 124902 | 4.72E-13 | 0.88 |
| 28884 | 127109 | 127387 | 5.78E-15 | 0.99 |
| 28884 | 130002 | 130369 | 7.37E-09 | 0.82 |
| 28885 | 6503   | 6708   | 2.34E-14 | 1    |
| 28885 | 43254  | 43751  | 3.63E-22 | 0.61 |
| 28885 | 45803  | 46109  | 1.21E-07 | 0.82 |
| 28887 | 4829   | 5185   | 1.16E-03 | 0.83 |
| 28887 | 7181   | 7452   | 2.44E-09 | 0.82 |
| 28887 | 7743   | 8027   | 5.18E-07 | 0.91 |
| 28887 | 14037  | 14264  | 1.89E-08 | 0.81 |
| 28890 | 801    | 1028   | 1.25E-04 | 1    |
| 28890 | 4772   | 5046   | 6.56E-04 | 0.67 |
| 28896 | 11610  | 11973  | 2.88E-07 | 0.91 |
| 28898 | 6126   | 6326   | 3.48E-07 | 0.97 |
| 28899 | 573    | 792    | 5.66E-08 | 0.85 |
| 28908 | 9389   | 10148  | 6.13E-06 | 0.9  |
| 28909 | 1757   | 2073   | 7.94E-09 | 0.87 |
| 28909 | 18524  | 18934  | 5.45E-20 | 0.74 |
| 28909 | 20277  | 20703  | 3.06E-11 | 0.79 |
| 28909 | 51921  | 52200  | 1.03E-11 | 0.73 |
| 28909 | 53553  | 54062  | 1.29E-14 | 0.85 |
| 28909 | 54425  | 54753  | 1.23E-25 | 0.83 |
| 28909 | 55021  | 55815  | 7.47E-31 | 0.6  |
| 28909 | 57201  | 57465  | 3.20E-08 | 0.82 |
| 28909 | 57222  | 57522  | 6.47E-08 | 0.81 |
| 28909 | 60956  | 61976  | 1.87E-55 | 0.87 |
| 28923 | 17595  | 18006  | 1.91E-15 | 0.73 |
| 28929 | 36416  | 36640  | 3.71E-17 | 0.93 |
| 28934 | 27125  | 27580  | 4.40E-25 | 0.89 |
| 28934 | 42438  | 42701  | 6.80E-22 | 0.77 |
| 28947 | 715    | 1071   | 1.56E-08 | 0.7  |
| 28947 | 6335   | 6683   | 1.99E-38 | 0.93 |
| 28952 | 10042  | 10519  | 1.74E-47 | 0.96 |
| 28952 | 27004  | 27594  | 1.70E-18 | 0.72 |
| 28957 | 1370   | 1751   | 1.96E-04 | 0.87 |
| 28957 | 15534  | 15872  | 1.72E-05 | 0.9  |
| 28962 | 26103  | 26424  | 2.95E-07 | 0.81 |
| 28962 | 30051  | 30255  | 2.43E-16 | 0.77 |
| 28962 | 34570  | 34919  | 8.81E-26 | 0.9  |
| 28962 | 52379  | 53323  | 1.67E-16 | 0.65 |
| 28962 | 77957  | 78280  | 1.17E-13 | 0.79 |
| 28962 | 87413  | 87886  | 3.51E-40 | 0.93 |
| 28962 | 94565  | 95703  | 1.19E-28 | 0.61 |
| 28962 | 99960  | 100769 | 6.66E-45 | 0.79 |
| 28962 | 105883 | 106088 | 1.91E-10 | 0.66 |
| 28966 | 14360  | 14883  | 6.61E-22 | 0.85 |
| 28966 | 15165  | 15682  | 7.81E-25 | 0.85 |
| 28966 | 30110  | 30612  | 5.12E-10 | 0.78 |
| 28966 | 33412  | 33671  | 5.10E-31 | 0.87 |
| 28966 | 33905  | 34156  | 2.42E-25 | 0.92 |

|       |        |        |           |      |
|-------|--------|--------|-----------|------|
| 28966 | 34909  | 35603  | 7.19E-32  | 0.94 |
| 28966 | 35857  | 36794  | 7.93E-32  | 0.92 |
| 28966 | 58266  | 59199  | 1.76E-11  | 0.81 |
| 28966 | 64223  | 64930  | 6.82E-19  | 0.75 |
| 28966 | 67937  | 68480  | 2.82E-12  | 0.82 |
| 28966 | 72712  | 72981  | 6.72E-08  | 0.79 |
| 28966 | 77393  | 77720  | 1.13E-25  | 0.83 |
| 28966 | 89492  | 89744  | 2.80E-16  | 0.82 |
| 28966 | 145206 | 145451 | 2.85E-27  | 0.92 |
| 28966 | 146856 | 147509 | 1.57E-18  | 0.77 |
| 28966 | 150309 | 150900 | 5.44E-30  | 0.75 |
| 28966 | 183232 | 183615 | 1.11E-14  | 0.88 |
| 28966 | 187114 | 187908 | 9.91E-62  | 0.98 |
| 28966 | 198428 | 198892 | 3.26E-23  | 0.75 |
| 28966 | 199130 | 199671 | 1.39E-18  | 0.65 |
| 28966 | 209284 | 209679 | 4.31E-47  | 0.94 |
| 28966 | 213337 | 214090 | 9.85E-40  | 0.84 |
| 28966 | 219108 | 219329 | 5.83E-17  | 0.92 |
| 28966 | 221200 | 221957 | 2.85E-29  | 0.82 |
| 28966 | 230352 | 230868 | 2.62E-19  | 0.8  |
| 28966 | 233097 | 233520 | 2.41E-26  | 0.8  |
| 28966 | 241142 | 241447 | 1.95E-15  | 0.69 |
| 28978 | 707    | 938    | 3.67E-09  | 0.76 |
| 28978 | 1936   | 2637   | 1.89E-22  | 0.85 |
| 28978 | 6570   | 7021   | 4.66E-40  | 0.94 |
| 28978 | 8977   | 9318   | 9.39E-14  | 0.81 |
| 28978 | 27322  | 27562  | 8.38E-25  | 0.94 |
| 28985 | 753    | 1086   | 3.85E-09  | 0.97 |
| 28986 | 31091  | 31350  | 3.43E-16  | 0.64 |
| 28988 | 2187   | 2536   | 5.93E-33  | 0.96 |
| 28989 | 941    | 1254   | 3.77E-66  | 0.94 |
| 28989 | 1461   | 2100   | 5.00E-42  | 0.94 |
| 29001 | 8477   | 9044   | 2.09E-06  | 0.82 |
| 29001 | 9528   | 9931   | 1.38E-07  | 0.88 |
| 29002 | 2297   | 3175   | 2.18E-36  | 0.88 |
| 29002 | 17680  | 17942  | 5.53E-15  | 0.87 |
| 29002 | 60326  | 61114  | 5.31E-32  | 0.8  |
| 29002 | 92364  | 92635  | 1.65E-32  | 0.95 |
| 29002 | 101587 | 102096 | 1.22E-22  | 0.76 |
| 29003 | 47282  | 47760  | 4.01E-10  | 0.88 |
| 29003 | 50846  | 51292  | 1.51E-35  | 0.83 |
| 29005 | 2801   | 3059   | 5.37E-10  | 0.8  |
| 29005 | 2817   | 3062   | 1.26E-09  | 0.79 |
| 29005 | 5956   | 7162   | 7.69E-108 | 0.96 |
| 29005 | 22906  | 23258  | 7.10E-20  | 0.79 |
| 29005 | 23569  | 24211  | 5.70E-32  | 0.94 |
| 29005 | 25983  | 26389  | 1.49E-43  | 0.91 |
| 29005 | 29360  | 29767  | 2.40E-38  | 0.95 |
| 29005 | 41156  | 41538  | 6.99E-19  | 0.9  |
| 29005 | 44015  | 44813  | 2.47E-24  | 0.79 |
| 29005 | 54615  | 55267  | 3.14E-48  | 0.95 |
| 29005 | 99183  | 99663  | 1.65E-19  | 0.73 |
| 29005 | 104602 | 104950 | 2.52E-44  | 0.83 |

|       |        |        |          |      |
|-------|--------|--------|----------|------|
| 29005 | 105265 | 105621 | 6.97E-29 | 0.86 |
| 29005 | 118209 | 118505 | 1.07E-97 | 0.87 |
| 29010 | 29520  | 30189  | 2.62E-27 | 0.87 |
| 29010 | 41627  | 42334  | 8.01E-57 | 0.82 |
| 29010 | 42691  | 42898  | 2.68E-38 | 0.93 |
| 29010 | 43099  | 43385  | 6.76E-50 | 0.86 |
| 29010 | 44834  | 45099  | 1.69E-22 | 0.86 |
| 29010 | 51134  | 51739  | 5.42E-51 | 0.97 |
| 29010 | 52175  | 52796  | 2.72E-55 | 0.81 |
| 29010 | 58145  | 58577  | 3.60E-64 | 0.94 |
| 29010 | 62654  | 63137  | 5.93E-28 | 0.91 |
| 29010 | 69670  | 70538  | 8.18E-28 | 0.79 |
| 29010 | 108590 | 108915 | 4.53E-35 | 0.88 |
| 29010 | 113578 | 114183 | 2.72E-29 | 0.8  |
| 29010 | 119173 | 119463 | 3.96E-19 | 0.83 |
| 29010 | 119705 | 120000 | 1.73E-17 | 0.88 |
| 29016 | 802    | 1260   | 3.48E-05 | 0.88 |
| 29016 | 5894   | 6394   | 9.45E-06 | 1    |
| 29016 | 7804   | 8187   | 1.80E-06 | 0.95 |
| 29016 | 41625  | 42144  | 6.11E-08 | 1    |
| 29020 | 20290  | 20619  | 3.66E-07 | 0.88 |
| 29020 | 33250  | 33480  | 3.03E-03 | 0.78 |
| 29020 | 34000  | 34233  | 1.25E-10 | 0.8  |
| 29020 | 37839  | 38165  | 5.02E-06 | 0.91 |
| 29020 | 49042  | 49326  | 1.76E-07 | 0.79 |
| 29021 | 1532   | 1765   | 1.63E-04 | 1    |
| 29021 | 2920   | 3512   | 1.14E-19 | 0.82 |
| 29021 | 4762   | 5188   | 5.14E-10 | 0.87 |
| 29021 | 20007  | 20358  | 4.95E-06 | 0.83 |
| 29021 | 36863  | 37114  | 2.45E-19 | 0.92 |
| 29035 | 614    | 1061   | 2.19E-16 | 0.85 |
| 29037 | 43453  | 43715  | 2.26E-09 | 0.91 |
| 29037 | 46933  | 47328  | 5.41E-13 | 0.81 |
| 29037 | 47113  | 47345  | 2.62E-12 | 0.81 |
| 29044 | 87815  | 88237  | 2.37E-32 | 0.77 |
| 29048 | 269    | 864    | 7.25E-37 | 0.95 |
| 29049 | 12704  | 12980  | 9.45E-04 | 0.94 |
| 29061 | 15214  | 15621  | 2.53E-06 | 0.79 |
| 29061 | 15796  | 16106  | 1.10E-05 | 0.86 |
| 29063 | 308    | 689    | 3.15E-14 | 0.95 |
| 29063 | 23051  | 23266  | 2.40E-08 | 0.91 |
| 29063 | 47846  | 48158  | 4.47E-09 | 0.95 |
| 29070 | 31256  | 31810  | 5.93E-25 | 0.62 |
| 29075 | 8880   | 9773   | 2.10E-88 | 0.89 |
| 29080 | 3440   | 4088   | 4.17E-32 | 0.64 |
| 29080 | 17911  | 18434  | 2.01E-21 | 0.86 |
| 29080 | 22374  | 22730  | 5.92E-21 | 0.8  |
| 29080 | 23309  | 23582  | 8.27E-21 | 0.8  |
| 29080 | 24576  | 25092  | 7.03E-28 | 0.78 |
| 29080 | 30124  | 30495  | 3.12E-50 | 0.66 |
| 29080 | 35526  | 36985  | 1.02E-69 | 0.71 |
| 29080 | 37189  | 37553  | 3.54E-23 | 0.77 |
| 29083 | 5698   | 5900   | 8.02E-27 | 0.86 |

|       |        |        |          |      |
|-------|--------|--------|----------|------|
| 29090 | 17557  | 18032  | 5.82E-33 | 0.63 |
| 29092 | 2909   | 3385   | 2.53E-15 | 0.77 |
| 29092 | 53917  | 54508  | 3.81E-26 | 0.76 |
| 29092 | 63001  | 63562  | 8.42E-22 | 0.69 |
| 29092 | 70194  | 70423  | 2.08E-51 | 0.91 |
| 29092 | 107852 | 108474 | 2.97E-31 | 0.89 |
| 29092 | 110174 | 110459 | 1.39E-19 | 0.88 |
| 29092 | 110660 | 111827 | 2.11E-47 | 0.85 |
| 29092 | 114406 | 115133 | 1.72E-39 | 0.81 |
| 29092 | 121673 | 122556 | 3.27E-41 | 0.83 |
| 29092 | 128675 | 129287 | 4.04E-27 | 0.67 |
| 29092 | 241208 | 241680 | 4.75E-78 | 0.86 |
| 29093 | 37913  | 38287  | 5.24E-17 | 0.94 |
| 29093 | 53036  | 54396  | 1.14E-60 | 0.67 |
| 29093 | 55784  | 55993  | 1.67E-22 | 0.65 |
| 29093 | 60287  | 60955  | 3.16E-69 | 0.94 |
| 29093 | 67370  | 68097  | 6.72E-56 | 0.81 |
| 29093 | 71568  | 71769  | 3.76E-15 | 0.82 |
| 29093 | 72020  | 72442  | 9.80E-18 | 0.82 |
| 29094 | 1101   | 1754   | 9.72E-22 | 0.65 |
| 29105 | 16909  | 17221  | 1.06E-24 | 0.87 |
| 29109 | 1089   | 1375   | 5.22E-09 | 0.68 |
| 29112 | 942    | 1504   | 1.50E-12 | 0.94 |
| 29112 | 2047   | 2420   | 4.02E-18 | 0.94 |
| 29112 | 2653   | 3190   | 3.80E-09 | 0.88 |
| 29112 | 3918   | 4912   | 2.67E-61 | 0.96 |
| 29116 | 20324  | 20620  | 2.09E-19 | 0.88 |
| 29116 | 31175  | 31600  | 2.68E-06 | 0.96 |
| 29118 | 5107   | 5715   | 3.69E-25 | 0.73 |
| 29118 | 10662  | 11628  | 1.10E-37 | 0.76 |
| 29118 | 13263  | 13532  | 3.88E-14 | 0.79 |
| 29118 | 19779  | 20299  | 1.97E-33 | 0.79 |
| 29118 | 20655  | 20878  | 3.51E-37 | 0.93 |
| 29118 | 25512  | 25891  | 6.59E-27 | 0.82 |
| 29118 | 27861  | 28693  | 5.33E-47 | 0.93 |
| 29122 | 5289   | 5855   | 1.57E-45 | 0.85 |
| 29130 | 3174   | 3576   | 2.96E-10 | 0.72 |
| 29154 | 17907  | 18602  | 3.36E-37 | 0.78 |
| 29154 | 21712  | 22019  | 1.77E-18 | 0.83 |
| 29154 | 22040  | 22924  | 1.96E-21 | 0.78 |
| 29154 | 47678  | 48379  | 1.60E-61 | 0.86 |
| 29154 | 63718  | 63977  | 7.07E-13 | 0.85 |
| 29154 | 68049  | 68658  | 8.00E-23 | 0.79 |
| 29154 | 70807  | 71693  | 3.92E-58 | 0.74 |
| 29155 | 6289   | 6662   | 1.04E-10 | 0.74 |
| 29157 | 8043   | 8501   | 1.23E-20 | 0.91 |
| 29158 | 123    | 555    | 2.83E-15 | 0.66 |
| 29158 | 26087  | 27063  | 1.63E-24 | 0.76 |
| 29158 | 30939  | 31308  | 5.63E-20 | 0.79 |
| 29158 | 32966  | 33571  | 1.14E-41 | 0.94 |
| 29158 | 43542  | 44778  | 4.55E-96 | 0.87 |
| 29158 | 45563  | 45875  | 2.35E-21 | 0.62 |
| 29158 | 74288  | 74681  | 2.11E-23 | 0.68 |

|       |        |        |           |      |
|-------|--------|--------|-----------|------|
| 29158 | 77572  | 78326  | 6.79E-89  | 0.87 |
| 29159 | 31686  | 31900  | 1.17E-03  | 1    |
| 29159 | 56208  | 56478  | 3.65E-10  | 0.96 |
| 29165 | 3375   | 4278   | 1.77E-39  | 0.63 |
| 29165 | 5118   | 5353   | 7.88E-18  | 0.83 |
| 29165 | 10166  | 10516  | 1.10E-12  | 0.8  |
| 29168 | 35238  | 35533  | 4.77E-15  | 0.8  |
| 29168 | 69116  | 69345  | 4.17E-15  | 0.82 |
| 29168 | 81987  | 82406  | 3.59E-20  | 0.87 |
| 29168 | 109000 | 110084 | 1.00E-40  | 0.83 |
| 29168 | 135857 | 136344 | 6.63E-14  | 0.77 |
| 29168 | 150203 | 150949 | 1.26E-63  | 0.92 |
| 29169 | 110    | 659    | 2.92E-12  | 0.8  |
| 29169 | 17749  | 18595  | 2.91E-44  | 0.78 |
| 29171 | 4938   | 5770   | 9.42E-40  | 0.96 |
| 29171 | 6095   | 6408   | 1.07E-32  | 0.97 |
| 29171 | 9872   | 11820  | 9.76E-243 | 0.94 |
| 29171 | 11679  | 12314  | 3.38E-14  | 0.91 |
| 29171 | 17253  | 17677  | 5.97E-31  | 0.96 |
| 29171 | 17888  | 18433  | 8.40E-60  | 0.93 |
| 29171 | 34965  | 35231  | 2.20E-26  | 0.93 |
| 29171 | 39327  | 39742  | 1.15E-49  | 0.98 |
| 29171 | 40529  | 40858  | 3.60E-31  | 0.94 |
| 29171 | 51980  | 52878  | 2.94E-45  | 0.94 |
| 29171 | 68273  | 69111  | 8.88E-31  | 0.82 |
| 29171 | 95630  | 95988  | 5.88E-21  | 0.65 |
| 29171 | 111844 | 113276 | 4.93E-80  | 0.93 |
| 29171 | 151370 | 152506 | 9.91E-76  | 0.83 |
| 29171 | 152733 | 153044 | 5.04E-33  | 0.87 |
| 29171 | 153350 | 153649 | 6.87E-32  | 0.92 |
| 29171 | 155844 | 156044 | 2.49E-41  | 0.88 |
| 29171 | 219498 | 219877 | 3.65E-28  | 0.91 |
| 29171 | 232024 | 232606 | 9.65E-32  | 0.97 |
| 29171 | 237068 | 238157 | 7.88E-23  | 0.65 |
| 29171 | 238531 | 239165 | 2.20E-31  | 0.93 |
| 29171 | 243639 | 244239 | 1.10E-48  | 0.95 |
| 29172 | 29747  | 30086  | 1.17E-20  | 0.82 |
| 29172 | 30546  | 30909  | 2.28E-23  | 0.79 |
| 29172 | 36473  | 37230  | 2.19E-16  | 0.75 |
| 29172 | 48402  | 48953  | 2.01E-40  | 0.92 |
| 29172 | 52802  | 54182  | 4.82E-133 | 0.87 |
| 29172 | 64445  | 65362  | 6.20E-57  | 0.76 |
| 29172 | 66161  | 66833  | 2.09E-78  | 0.93 |
| 29172 | 68911  | 69189  | 1.90E-23  | 0.76 |
| 29176 | 109    | 416    | 1.13E-07  | 0.81 |
| 29176 | 15757  | 16189  | 4.93E-23  | 0.84 |
| 29176 | 17736  | 18017  | 5.37E-29  | 0.78 |
| 29176 | 34751  | 35042  | 2.68E-77  | 0.83 |
| 29176 | 93963  | 95439  | 1.10E-84  | 0.96 |
| 29176 | 95691  | 96533  | 7.76E-76  | 0.84 |
| 29182 | 3100   | 3319   | 5.25E-12  | 0.85 |
| 29186 | 1348   | 1575   | 1.31E-04  | 0.92 |
| 29188 | 1141   | 1399   | 4.46E-19  | 0.78 |



|       |        |        |           |      |
|-------|--------|--------|-----------|------|
| 29188 | 11686  | 12128  | 4.14E-22  | 0.88 |
| 29191 | 6910   | 8308   | 1.68E-64  | 0.87 |
| 29191 | 8796   | 9198   | 3.43E-08  | 0.7  |
| 29191 | 11266  | 11580  | 1.30E-39  | 0.99 |
| 29191 | 15435  | 15790  | 1.24E-33  | 0.94 |
| 29195 | 1340   | 1670   | 2.50E-42  | 0.89 |
| 29195 | 11300  | 11844  | 2.64E-14  | 0.71 |
| 29195 | 14126  | 14650  | 2.30E-37  | 0.84 |
| 29195 | 26316  | 27142  | 9.45E-31  | 0.8  |
| 29195 | 26430  | 27484  | 3.32E-34  | 0.79 |
| 29200 | 8684   | 9443   | 2.60E-31  | 0.65 |
| 29200 | 44219  | 44802  | 1.46E-39  | 0.9  |
| 29200 | 45287  | 46077  | 6.85E-37  | 0.74 |
| 29200 | 67759  | 68193  | 5.51E-29  | 0.9  |
| 29200 | 69003  | 69728  | 1.58E-100 | 0.9  |
| 29206 | 9207   | 9585   | 4.07E-74  | 0.96 |
| 29206 | 9789   | 10071  | 4.83E-26  | 0.81 |
| 29206 | 12182  | 12538  | 2.81E-20  | 0.94 |
| 29206 | 13632  | 14410  | 2.07E-27  | 0.88 |
| 29206 | 13909  | 14938  | 1.05E-36  | 0.83 |
| 29206 | 28171  | 28662  | 7.24E-29  | 0.93 |
| 29206 | 34707  | 35033  | 9.65E-22  | 0.8  |
| 29206 | 38250  | 38695  | 2.75E-17  | 0.66 |
| 29206 | 45439  | 45927  | 2.98E-14  | 0.93 |
| 29206 | 47573  | 48076  | 2.64E-11  | 0.83 |
| 29206 | 48962  | 49347  | 4.57E-84  | 0.91 |
| 29206 | 55785  | 56021  | 3.83E-30  | 0.98 |
| 29206 | 57051  | 57514  | 3.45E-20  | 0.89 |
| 29206 | 87160  | 87638  | 1.89E-20  | 0.68 |
| 29206 | 87911  | 88453  | 1.42E-13  | 0.72 |
| 29206 | 92945  | 93269  | 3.61E-13  | 0.82 |
| 29206 | 102903 | 103230 | 4.73E-15  | 0.86 |
| 29212 | 22332  | 22752  | 5.87E-37  | 0.88 |
| 29212 | 34797  | 35441  | 2.01E-19  | 0.89 |
| 29212 | 37976  | 38405  | 2.24E-69  | 0.93 |
| 29212 | 56097  | 56647  | 2.91E-11  | 0.7  |
| 29212 | 65628  | 66628  | 1.68E-30  | 0.66 |
| 29212 | 75330  | 76511  | 2.59E-78  | 0.81 |
| 29212 | 118135 | 118403 | 4.21E-21  | 0.89 |
| 29212 | 130343 | 131394 | 1.37E-50  | 0.86 |
| 29215 | 1588   | 1828   | 6.33E-20  | 0.73 |
| 29216 | 31234  | 31839  | 1.23E-31  | 0.84 |
| 29216 | 44392  | 45835  | 6.06E-48  | 0.64 |
| 29216 | 89300  | 90016  | 2.61E-57  | 0.82 |
| 29216 | 107049 | 107424 | 4.56E-19  | 0.63 |
| 29217 | 6933   | 7487   | 3.98E-26  | 0.72 |
| 29217 | 8333   | 8920   | 1.31E-49  | 0.9  |
| 29217 | 34909  | 35223  | 5.98E-29  | 0.77 |
| 29222 | 889    | 1286   | 4.14E-04  | 0.82 |
| 29222 | 18982  | 19304  | 8.22E-32  | 0.92 |
| 29222 | 24987  | 25343  | 3.52E-18  | 0.63 |
| 29222 | 36583  | 37518  | 1.39E-124 | 0.82 |
| 29222 | 52949  | 53451  | 4.55E-14  | 0.87 |

|       |        |        |           |      |
|-------|--------|--------|-----------|------|
| 29222 | 59140  | 59880  | 2.15E-19  | 0.82 |
| 29222 | 60639  | 62208  | 7.49E-110 | 0.93 |
| 29222 | 66216  | 66807  | 5.32E-41  | 0.89 |
| 29222 | 67294  | 67728  | 6.49E-17  | 0.83 |
| 29222 | 70736  | 71201  | 1.05E-26  | 0.93 |
| 29222 | 77939  | 78295  | 1.99E-17  | 0.83 |
| 29222 | 98647  | 99077  | 3.79E-16  | 0.69 |
| 29222 | 145225 | 145756 | 9.49E-70  | 0.86 |
| 29222 | 171150 | 171396 | 1.68E-27  | 0.93 |
| 29222 | 198748 | 198982 | 2.26E-15  | 0.83 |
| 29222 | 201864 | 202183 | 2.39E-19  | 0.81 |
| 29222 | 206271 | 206949 | 2.19E-47  | 0.9  |
| 29222 | 214630 | 214836 | 9.75E-13  | 0.74 |
| 29222 | 217632 | 218120 | 1.39E-13  | 0.64 |
| 29222 | 218327 | 218615 | 1.39E-11  | 0.66 |
| 29223 | 4533   | 5559   | 1.53E-103 | 0.74 |
| 29223 | 5879   | 6414   | 1.43E-65  | 0.78 |
| 29226 | 4376   | 4717   | 9.04E-25  | 0.81 |
| 29226 | 24539  | 25007  | 8.13E-43  | 0.82 |
| 29233 | 859    | 2252   | 6.00E-86  | 0.87 |
| 29233 | 6092   | 6490   | 3.64E-11  | 0.63 |
| 29235 | 17197  | 18128  | 2.25E-45  | 0.61 |
| 29235 | 18383  | 19091  | 1.84E-47  | 0.86 |
| 29235 | 31916  | 33022  | 5.20E-105 | 0.89 |
| 29235 | 36596  | 37344  | 2.96E-71  | 0.8  |
| 29235 | 37581  | 38836  | 2.21E-124 | 0.85 |
| 29235 | 39101  | 39628  | 2.86E-66  | 0.96 |
| 29235 | 40130  | 40484  | 1.26E-57  | 0.87 |
| 29235 | 40913  | 41342  | 2.00E-21  | 0.73 |
| 29235 | 45760  | 46214  | 1.40E-19  | 0.81 |
| 29235 | 49578  | 50482  | 2.96E-64  | 0.67 |
| 29235 | 99074  | 99326  | 1.07E-04  | 0.89 |
| 29247 | 10812  | 11391  | 4.26E-07  | 0.71 |
| 29247 | 11701  | 12088  | 2.06E-03  | 0.78 |
| 29247 | 11894  | 12398  | 1.18E-05  | 0.71 |
| 29247 | 12398  | 12684  | 6.50E-06  | 0.77 |
| 29250 | 17641  | 18460  | 8.24E-104 | 0.8  |
| 29250 | 46147  | 46502  | 1.98E-27  | 0.88 |
| 29250 | 77678  | 78163  | 1.54E-49  | 0.9  |
| 29252 | 14420  | 14926  | 2.85E-15  | 0.95 |
| 29252 | 16960  | 17404  | 6.30E-09  | 0.9  |
| 29261 | 8      | 471    | 9.26E-10  | 0.9  |
| 29261 | 3276   | 3564   | 7.00E-04  | 0.9  |
| 29261 | 3543   | 3905   | 3.22E-12  | 0.87 |
| 29263 | 7117   | 7661   | 6.55E-29  | 0.7  |
| 29263 | 7933   | 8526   | 2.28E-16  | 0.68 |
| 29263 | 13878  | 14516  | 6.43E-22  | 0.84 |
| 29263 | 51888  | 52529  | 3.44E-23  | 0.78 |
| 29266 | 8747   | 9405   | 5.17E-11  | 0.85 |
| 29269 | 41155  | 41864  | 5.64E-82  | 0.9  |
| 29269 | 42303  | 42971  | 2.11E-39  | 0.8  |
| 29269 | 64906  | 65310  | 2.11E-18  | 0.84 |
| 29269 | 79628  | 79891  | 6.86E-31  | 0.78 |

|       |        |        |           |      |
|-------|--------|--------|-----------|------|
| 29269 | 86908  | 87192  | 1.01E-15  | 0.83 |
| 29269 | 105030 | 109066 | 2.49E-162 | 0.76 |
| 29272 | 25389  | 25816  | 8.58E-18  | 0.81 |
| 29272 | 41415  | 41914  | 1.55E-25  | 0.65 |
| 29275 | 1183   | 1571   | 1.31E-05  | 0.79 |
| 29277 | 774    | 1123   | 4.71E-62  | 0.67 |
| 29278 | 18888  | 19385  | 1.62E-23  | 0.8  |
| 29278 | 26695  | 26983  | 5.79E-17  | 0.86 |
| 29278 | 57023  | 57727  | 1.36E-37  | 0.88 |
| 29279 | 4607   | 5348   | 5.85E-21  | 0.71 |
| 29279 | 25495  | 26015  | 1.63E-46  | 0.84 |
| 29279 | 29188  | 31875  | 6.73E-64  | 0.73 |
| 29279 | 33104  | 33443  | 3.29E-12  | 0.85 |
| 29279 | 41459  | 42104  | 3.35E-24  | 0.92 |
| 29279 | 42601  | 42934  | 1.07E-26  | 0.91 |
| 29279 | 53500  | 53975  | 9.60E-33  | 0.88 |
| 29279 | 54297  | 54655  | 2.26E-12  | 0.77 |
| 29279 | 55990  | 57070  | 1.91E-21  | 0.8  |
| 29279 | 57963  | 58909  | 3.82E-29  | 0.82 |
| 29279 | 59415  | 60043  | 5.47E-41  | 0.96 |
| 29279 | 60286  | 61026  | 1.06E-19  | 0.83 |
| 29279 | 61060  | 61847  | 1.30E-20  | 0.81 |
| 29279 | 62569  | 62974  | 3.41E-42  | 0.85 |
| 29289 | 6716   | 7420   | 4.77E-34  | 0.83 |
| 29289 | 9951   | 10195  | 1.06E-14  | 0.75 |
| 29289 | 13038  | 13487  | 6.38E-14  | 0.72 |
| 29290 | 9022   | 9453   | 4.89E-36  | 0.97 |
| 29290 | 9678   | 10104  | 3.96E-78  | 0.92 |
| 29290 | 10985  | 11654  | 5.05E-49  | 0.91 |
| 29290 | 41334  | 41661  | 5.58E-08  | 0.79 |
| 29295 | 13430  | 14444  | 3.44E-31  | 0.93 |
| 29300 | 2983   | 3969   | 2.81E-34  | 0.8  |
| 29300 | 8751   | 9343   | 1.21E-22  | 0.89 |
| 29304 | 85208  | 85505  | 9.30E-07  | 0.89 |
| 29304 | 100186 | 100614 | 1.50E-09  | 0.93 |
| 29308 | 22997  | 23872  | 8.68E-41  | 0.7  |
| 29308 | 33480  | 34800  | 1.70E-35  | 0.78 |
| 29308 | 44994  | 46113  | 1.00E-46  | 0.82 |
| 29308 | 46570  | 47351  | 1.39E-24  | 0.78 |
| 29308 | 53761  | 54382  | 6.63E-26  | 0.81 |
| 29308 | 69284  | 69814  | 1.15E-24  | 0.69 |
| 29308 | 70103  | 70882  | 2.80E-40  | 0.89 |
| 29308 | 77047  | 77575  | 1.46E-24  | 0.91 |
| 29308 | 77908  | 78430  | 7.24E-49  | 0.84 |
| 29308 | 90410  | 90779  | 1.06E-87  | 0.94 |
| 29312 | 3758   | 4302   | 6.52E-07  | 1    |
| 29325 | 1336   | 1917   | 5.04E-19  | 0.85 |
| 29327 | 14722  | 15042  | 1.41E-08  | 0.87 |
| 29333 | 6750   | 8106   | 7.58E-66  | 0.85 |
| 29333 | 8670   | 9172   | 1.24E-47  | 0.88 |
| 29333 | 26452  | 26755  | 6.47E-10  | 0.83 |
| 29333 | 72311  | 72520  | 5.80E-07  | 0.92 |
| 29333 | 75846  | 77480  | 3.97E-65  | 0.79 |

|       |        |        |           |      |
|-------|--------|--------|-----------|------|
| 29333 | 78533  | 79215  | 7.81E-34  | 0.86 |
| 29333 | 82259  | 82652  | 2.52E-24  | 0.95 |
| 29333 | 82993  | 83471  | 8.76E-20  | 0.82 |
| 29333 | 84478  | 85360  | 1.10E-39  | 0.86 |
| 29333 | 87109  | 87628  | 4.66E-27  | 0.81 |
| 29333 | 108817 | 109023 | 1.04E-15  | 0.74 |
| 29333 | 116244 | 116730 | 6.79E-31  | 0.92 |
| 29333 | 117214 | 118030 | 1.34E-60  | 0.87 |
| 29333 | 118496 | 118810 | 7.23E-64  | 0.94 |
| 29333 | 131655 | 132022 | 2.96E-15  | 0.83 |
| 29333 | 132262 | 132967 | 8.54E-24  | 0.88 |
| 29333 | 135953 | 136179 | 2.93E-19  | 0.88 |
| 29333 | 139247 | 139898 | 4.03E-31  | 0.9  |
| 29333 | 170952 | 171197 | 2.37E-44  | 0.91 |
| 29333 | 190012 | 190513 | 4.02E-06  | 0.74 |
| 29333 | 199097 | 199494 | 2.95E-82  | 0.86 |
| 29333 | 225367 | 228291 | 2.27E-152 | 0.73 |
| 29333 | 243886 | 244320 | 8.96E-20  | 0.84 |
| 29333 | 270578 | 270884 | 2.13E-13  | 0.83 |
| 29333 | 270652 | 270909 | 2.25E-13  | 0.83 |
| 29333 | 273578 | 274055 | 3.67E-25  | 0.85 |
| 29333 | 286666 | 286992 | 4.72E-23  | 0.8  |
| 29333 | 305340 | 305730 | 4.91E-13  | 0.66 |
| 29333 | 349549 | 349957 | 5.44E-56  | 0.85 |
| 29333 | 350591 | 351065 | 3.63E-34  | 0.82 |
| 29333 | 351568 | 351967 | 4.09E-18  | 0.9  |
| 29333 | 360573 | 361489 | 8.98E-32  | 0.79 |
| 29333 | 382861 | 383671 | 6.73E-34  | 0.85 |
| 29333 | 391087 | 391762 | 4.65E-72  | 0.91 |
| 29333 | 398847 | 399227 | 6.48E-25  | 0.88 |
| 29333 | 406430 | 407050 | 5.39E-52  | 0.83 |
| 29333 | 412142 | 412900 | 1.42E-27  | 0.71 |
| 29333 | 414314 | 415013 | 5.47E-06  | 0.77 |
| 29333 | 436591 | 437162 | 1.57E-29  | 0.84 |
| 29333 | 444557 | 444844 | 1.57E-13  | 0.71 |
| 29333 | 454724 | 455150 | 1.32E-16  | 0.66 |
| 29333 | 462672 | 462956 | 2.42E-11  | 0.79 |
| 29333 | 468317 | 468959 | 2.31E-35  | 0.77 |
| 29333 | 469225 | 469548 | 7.57E-23  | 0.61 |
| 29333 | 476122 | 476327 | 1.03E-06  | 0.82 |
| 29333 | 499574 | 500260 | 4.46E-35  | 0.84 |
| 29333 | 508716 | 509324 | 1.20E-54  | 0.83 |
| 29333 | 511932 | 512453 | 7.23E-38  | 0.92 |
| 29333 | 516467 | 518321 | 4.82E-82  | 0.89 |
| 29333 | 520916 | 521134 | 3.28E-06  | 0.88 |
| 29337 | 9231   | 10077  | 5.66E-44  | 0.73 |
| 29337 | 11487  | 12554  | 1.82E-139 | 0.85 |
| 29337 | 66737  | 67745  | 6.11E-62  | 0.72 |
| 29337 | 71440  | 71991  | 4.59E-19  | 0.83 |
| 29337 | 74077  | 74435  | 7.51E-30  | 0.95 |
| 29337 | 76521  | 76867  | 4.56E-23  | 0.81 |
| 29337 | 78606  | 79487  | 4.07E-53  | 0.87 |
| 29337 | 86470  | 86807  | 2.24E-31  | 0.83 |

|       |       |       |          |      |
|-------|-------|-------|----------|------|
| 29338 | 10531 | 10765 | 2.51E-05 | 0.78 |
| 29338 | 26804 | 27075 | 1.77E-04 | 0.79 |
| 29338 | 30477 | 30793 | 8.67E-11 | 0.92 |
| 29338 | 39012 | 39524 | 2.45E-05 | 0.81 |
| 29338 | 41632 | 41915 | 7.36E-07 | 0.88 |
| 29338 | 52941 | 53546 | 3.04E-07 | 0.84 |
| 29338 | 58167 | 58853 | 2.42E-14 | 0.9  |
| 29338 | 72580 | 72967 | 7.20E-21 | 0.92 |
| 29338 | 85570 | 86063 | 8.40E-11 | 0.79 |
| 29338 | 94672 | 95240 | 5.79E-27 | 0.97 |
| 29344 | 32725 | 33535 | 8.71E-40 | 0.81 |
| 29344 | 36029 | 36502 | 4.54E-24 | 0.87 |
| 29344 | 38064 | 38331 | 1.86E-34 | 0.86 |
| 29344 | 39260 | 39627 | 1.97E-17 | 0.88 |
| 29344 | 41007 | 41496 | 2.00E-33 | 0.65 |
| 29344 | 44024 | 44337 | 1.52E-14 | 0.79 |
| 29344 | 50764 | 51071 | 6.76E-08 | 0.86 |
| 29344 | 51490 | 51881 | 9.05E-50 | 0.94 |
| 29344 | 52179 | 53386 | 2.62E-97 | 0.94 |
| 29344 | 55781 | 57112 | 7.60E-32 | 0.78 |
| 29346 | 15245 | 15701 | 1.62E-21 | 0.61 |
| 29346 | 17658 | 18178 | 1.53E-48 | 0.81 |
| 29346 | 18388 | 18862 | 2.48E-16 | 0.8  |
| 29346 | 19395 | 20188 | 6.34E-39 | 0.9  |
| 29348 | 3033  | 3536  | 1.91E-05 | 0.89 |
| 29358 | 5991  | 7089  | 1.32E-46 | 0.91 |
| 29358 | 7359  | 7953  | 3.37E-33 | 0.89 |
| 29358 | 14577 | 14890 | 1.22E-09 | 0.96 |
| 29358 | 20686 | 21016 | 9.89E-51 | 0.91 |
| 29358 | 22898 | 23248 | 3.12E-36 | 0.74 |
| 29358 | 23755 | 23997 | 1.00E-25 | 0.92 |
| 29361 | 2266  | 2968  | 4.11E-40 | 0.94 |
| 29361 | 4815  | 5256  | 2.54E-21 | 0.93 |
| 29373 | 3190  | 3392  | 5.93E-17 | 0.92 |
| 29373 | 3896  | 4237  | 1.27E-23 | 0.9  |
| 29376 | 22099 | 22407 | 2.32E-07 | 0.97 |
| 29376 | 37623 | 37888 | 9.41E-04 | 0.84 |
| 29376 | 41483 | 41684 | 1.64E-07 | 0.97 |
| 29381 | 46307 | 46937 | 6.56E-09 | 0.79 |
| 29382 | 6024  | 6265  | 1.88E-05 | 0.74 |
| 29382 | 8490  | 9137  | 2.61E-08 | 0.72 |
| 29382 | 33157 | 33637 | 1.37E-27 | 0.84 |
| 29382 | 39505 | 39812 | 7.73E-09 | 1    |
| 29405 | 13016 | 14979 | 4.25E-82 | 0.78 |
| 29405 | 17413 | 17908 | 1.74E-45 | 0.77 |
| 29405 | 25750 | 26199 | 1.42E-13 | 0.61 |
| 29405 | 26452 | 26837 | 3.13E-11 | 0.69 |
| 29405 | 27431 | 28530 | 1.74E-77 | 0.9  |
| 29405 | 28758 | 29262 | 8.58E-15 | 0.78 |
| 29405 | 29493 | 29904 | 6.32E-17 | 0.78 |
| 29405 | 30699 | 31165 | 5.42E-09 | 0.8  |
| 29405 | 34017 | 35179 | 6.50E-74 | 0.87 |
| 29405 | 36444 | 36989 | 6.31E-17 | 0.67 |

|       |        |        |          |      |
|-------|--------|--------|----------|------|
| 29405 | 39207  | 39517  | 5.40E-07 | 0.8  |
| 29405 | 52716  | 53167  | 6.12E-14 | 0.72 |
| 29409 | 18487  | 19100  | 5.13E-44 | 0.65 |
| 29409 | 21440  | 21827  | 3.52E-26 | 0.77 |
| 29409 | 33464  | 33917  | 3.65E-11 | 0.75 |
| 29409 | 34484  | 35431  | 3.12E-43 | 0.85 |
| 29409 | 63822  | 64284  | 6.88E-35 | 0.96 |
| 29409 | 79145  | 79853  | 1.11E-18 | 0.65 |
| 29409 | 85658  | 85914  | 2.41E-15 | 0.84 |
| 29409 | 95481  | 95687  | 1.87E-17 | 0.78 |
| 29409 | 99250  | 99742  | 6.50E-32 | 0.98 |
| 29409 | 171213 | 171830 | 1.03E-44 | 0.83 |
| 29409 | 172297 | 172629 | 3.55E-30 | 0.73 |
| 29409 | 201973 | 202501 | 6.33E-26 | 0.92 |
| 29409 | 239898 | 240125 | 1.08E-03 | 0.67 |
| 29417 | 18316  | 18909  | 1.93E-28 | 0.92 |
| 29417 | 19117  | 19397  | 1.50E-17 | 0.9  |
| 29421 | 6587   | 6973   | 9.64E-06 | 0.79 |
| 29421 | 12662  | 13071  | 1.33E-10 | 0.93 |
| 29421 | 13202  | 13453  | 3.79E-06 | 0.89 |
| 29421 | 13768  | 14109  | 6.59E-07 | 0.96 |
| 29428 | 5021   | 5790   | 1.14E-46 | 0.89 |
| 29428 | 7813   | 8381   | 1.40E-19 | 0.82 |
| 29428 | 8722   | 9703   | 1.64E-41 | 0.81 |
| 29428 | 59183  | 60243  | 2.31E-48 | 0.86 |
| 29428 | 67209  | 68008  | 1.17E-26 | 0.8  |
| 29428 | 68916  | 69323  | 2.42E-12 | 0.79 |
| 29428 | 69702  | 70052  | 1.64E-24 | 0.9  |
| 29428 | 71541  | 73848  | 1.90E-88 | 0.86 |
| 29428 | 83190  | 84668  | 5.45E-55 | 0.87 |
| 29428 | 104305 | 104536 | 5.78E-15 | 0.85 |
| 29428 | 105625 | 106566 | 7.72E-48 | 0.83 |
| 29428 | 107697 | 108419 | 1.65E-21 | 0.71 |
| 29428 | 110693 | 111138 | 4.29E-27 | 0.92 |
| 29428 | 112300 | 113030 | 3.55E-34 | 0.88 |
| 29428 | 119203 | 119715 | 5.97E-13 | 0.8  |
| 29428 | 120600 | 120894 | 1.50E-38 | 0.95 |
| 29428 | 121304 | 121902 | 1.02E-32 | 0.95 |
| 29428 | 125221 | 125529 | 1.38E-38 | 0.94 |
| 29428 | 155261 | 155721 | 9.20E-22 | 0.79 |
| 29428 | 157890 | 158332 | 1.34E-35 | 0.84 |
| 29435 | 1939   | 2447   | 2.78E-04 | 0.96 |
| 29439 | 50655  | 51104  | 1.80E-16 | 0.84 |
| 29439 | 60635  | 60887  | 1.02E-07 | 0.61 |
| 29439 | 74476  | 74827  | 5.07E-11 | 0.91 |
| 29439 | 86482  | 87703  | 5.00E-35 | 0.8  |
| 29447 | 1149   | 1477   | 4.37E-06 | 0.65 |
| 29447 | 20710  | 20994  | 1.70E-08 | 0.88 |
| 29448 | 13873  | 14092  | 2.54E-07 | 0.85 |
| 29451 | 98     | 548    | 7.17E-20 | 0.82 |
| 29451 | 16142  | 17318  | 2.69E-46 | 0.7  |
| 29451 | 17598  | 18078  | 1.27E-12 | 0.79 |
| 29451 | 20832  | 21248  | 5.62E-18 | 0.93 |

|       |        |        |           |      |
|-------|--------|--------|-----------|------|
| 29453 | 21353  | 22110  | 1.00E-31  | 0.85 |
| 29453 | 23159  | 23734  | 1.82E-22  | 0.84 |
| 29453 | 30014  | 30615  | 5.31E-33  | 0.88 |
| 29453 | 33910  | 36921  | 2.98E-164 | 0.81 |
| 29453 | 40833  | 41277  | 2.57E-13  | 0.77 |
| 29453 | 41955  | 42357  | 2.11E-12  | 0.74 |
| 29453 | 62346  | 62994  | 1.66E-38  | 0.92 |
| 29457 | 7729   | 7962   | 4.83E-05  | 0.89 |
| 29457 | 14734  | 15141  | 3.39E-06  | 0.83 |
| 29458 | 5569   | 5982   | 9.94E-15  | 0.71 |
| 29458 | 7699   | 8661   | 4.13E-31  | 0.78 |
| 29458 | 8883   | 9174   | 2.01E-18  | 0.68 |
| 29458 | 9378   | 10518  | 1.56E-170 | 0.86 |
| 29458 | 13295  | 13506  | 5.91E-15  | 0.8  |
| 29458 | 13740  | 14326  | 1.35E-22  | 0.91 |
| 29458 | 20801  | 21096  | 4.02E-17  | 0.94 |
| 29458 | 34256  | 35171  | 1.63E-19  | 0.79 |
| 29458 | 35419  | 35883  | 7.33E-137 | 0.91 |
| 29458 | 39141  | 39494  | 1.36E-07  | 0.81 |
| 29458 | 47204  | 47576  | 3.33E-20  | 0.91 |
| 29459 | 41449  | 42238  | 6.31E-12  | 0.91 |
| 29459 | 56236  | 56607  | 3.84E-06  | 0.95 |
| 29460 | 52538  | 53018  | 8.08E-08  | 0.89 |
| 29460 | 60248  | 60885  | 4.49E-06  | 0.74 |
| 29460 | 73669  | 73904  | 4.03E-07  | 0.8  |
| 29460 | 77744  | 78322  | 2.58E-05  | 0.91 |
| 29461 | 11088  | 11898  | 1.81E-30  | 0.78 |
| 29461 | 14599  | 15293  | 4.23E-11  | 0.81 |
| 29461 | 38474  | 38687  | 2.45E-10  | 0.82 |
| 29461 | 45169  | 45400  | 4.62E-04  | 0.78 |
| 29461 | 45246  | 45683  | 2.45E-05  | 0.8  |
| 29461 | 55862  | 56111  | 4.28E-05  | 0.84 |
| 29461 | 58151  | 58782  | 4.38E-08  | 0.87 |
| 29461 | 61674  | 61976  | 1.40E-08  | 0.94 |
| 29461 | 100759 | 102310 | 2.19E-39  | 0.62 |
| 29461 | 102941 | 103498 | 1.12E-19  | 0.73 |
| 29461 | 103757 | 104061 | 2.23E-07  | 0.92 |
| 29462 | 5896   | 6555   | 4.09E-32  | 0.95 |
| 29462 | 47768  | 48125  | 7.67E-68  | 0.92 |
| 29462 | 67272  | 68450  | 3.56E-20  | 0.65 |
| 29462 | 92242  | 92637  | 3.74E-23  | 0.78 |
| 29462 | 94371  | 95153  | 4.67E-45  | 0.86 |
| 29462 | 123427 | 123655 | 1.60E-13  | 0.83 |
| 29462 | 129759 | 129994 | 3.73E-07  | 0.78 |
| 29462 | 146872 | 147265 | 7.29E-54  | 0.9  |
| 29462 | 156294 | 156625 | 3.68E-27  | 0.93 |
| 29462 | 158141 | 158754 | 1.21E-75  | 0.88 |
| 29462 | 159049 | 160246 | 7.16E-28  | 0.84 |
| 29462 | 164289 | 164580 | 2.88E-25  | 0.86 |
| 29462 | 197360 | 197604 | 1.54E-15  | 0.9  |
| 29462 | 198286 | 198537 | 2.22E-22  | 0.94 |
| 29462 | 199942 | 200412 | 7.28E-24  | 0.87 |
| 29462 | 207916 | 208729 | 3.24E-28  | 0.89 |

|       |        |        |          |      |
|-------|--------|--------|----------|------|
| 29462 | 209537 | 210147 | 1.76E-47 | 0.93 |
| 29462 | 210655 | 211096 | 5.24E-19 | 0.8  |
| 29462 | 211446 | 212008 | 1.34E-26 | 0.88 |
| 29462 | 212610 | 212913 | 5.03E-12 | 0.91 |
| 29462 | 235946 | 236418 | 1.63E-23 | 0.86 |
| 29462 | 237482 | 238000 | 1.00E-16 | 0.71 |
| 29462 | 240874 | 241615 | 1.98E-47 | 0.96 |
| 29462 | 242054 | 242634 | 4.07E-58 | 0.86 |
| 29462 | 262309 | 263029 | 1.03E-22 | 0.85 |
| 29462 | 287078 | 287499 | 1.03E-16 | 0.79 |
| 29462 | 287167 | 287501 | 5.20E-15 | 0.78 |
| 29462 | 294264 | 294646 | 1.88E-26 | 0.8  |
| 29467 | 26062  | 26818  | 5.35E-26 | 0.97 |
| 29469 | 3416   | 4028   | 2.38E-13 | 0.74 |
| 29469 | 10883  | 11700  | 1.55E-72 | 0.91 |
| 29469 | 12222  | 12702  | 1.63E-37 | 0.87 |
| 29469 | 25016  | 25552  | 1.49E-82 | 0.9  |
| 29472 | 4104   | 4396   | 7.12E-10 | 0.8  |
| 29472 | 9385   | 9756   | 3.11E-04 | 0.84 |
| 29472 | 10916  | 11231  | 1.29E-07 | 0.82 |
| 29472 | 14762  | 14976  | 2.75E-09 | 0.87 |
| 29472 | 15146  | 15418  | 4.94E-09 | 0.85 |
| 29472 | 18449  | 18682  | 3.33E-06 | 0.83 |
| 29472 | 18491  | 18701  | 2.66E-05 | 0.76 |
| 29475 | 4608   | 4954   | 1.77E-43 | 0.96 |
| 29475 | 6316   | 7319   | 1.17E-39 | 0.83 |
| 29475 | 30145  | 30793  | 1.49E-32 | 0.86 |
| 29475 | 31717  | 32622  | 4.40E-32 | 0.69 |
| 29475 | 34633  | 35279  | 2.69E-43 | 0.88 |
| 29475 | 37257  | 38070  | 4.36E-49 | 0.9  |
| 29475 | 38572  | 39754  | 1.44E-48 | 0.88 |
| 29475 | 42986  | 43336  | 3.54E-35 | 0.79 |
| 29475 | 48882  | 49137  | 8.31E-20 | 0.9  |
| 29475 | 51243  | 52375  | 2.10E-76 | 0.78 |
| 29475 | 61052  | 61977  | 3.36E-73 | 0.84 |
| 29475 | 62178  | 63387  | 6.04E-54 | 0.69 |
| 29475 | 65761  | 66529  | 1.25E-23 | 0.66 |
| 29475 | 66730  | 67255  | 1.88E-14 | 0.74 |
| 29475 | 67618  | 68140  | 2.83E-32 | 0.86 |
| 29475 | 72505  | 72836  | 3.11E-10 | 0.67 |
| 29475 | 73328  | 73906  | 3.65E-14 | 0.76 |
| 29475 | 84975  | 85475  | 4.69E-20 | 0.67 |
| 29476 | 13711  | 13981  | 2.53E-13 | 0.81 |
| 29476 | 15160  | 15532  | 1.74E-05 | 0.95 |
| 29476 | 26472  | 26719  | 1.14E-06 | 0.8  |
| 29476 | 32512  | 32853  | 5.99E-05 | 0.84 |
| 29479 | 36622  | 36993  | 1.08E-10 | 0.67 |
| 29480 | 13023  | 13905  | 1.25E-11 | 0.9  |
| 29481 | 17923  | 18242  | 1.11E-07 | 0.81 |
| 29482 | 12950  | 13399  | 2.07E-36 | 0.9  |
| 29482 | 30827  | 31279  | 6.50E-29 | 0.82 |
| 29482 | 36674  | 37028  | 2.39E-13 | 0.84 |
| 29482 | 37332  | 38216  | 3.88E-32 | 0.8  |



|       |        |        |          |      |
|-------|--------|--------|----------|------|
| 29482 | 38454  | 38830  | 1.03E-10 | 0.71 |
| 29482 | 57106  | 57696  | 1.27E-30 | 0.77 |
| 29482 | 64090  | 64374  | 1.44E-26 | 0.87 |
| 29482 | 73264  | 73646  | 3.45E-49 | 0.84 |
| 29482 | 78857  | 79207  | 3.41E-10 | 0.62 |
| 29482 | 79911  | 80126  | 3.25E-11 | 0.82 |
| 29482 | 80728  | 81127  | 1.22E-21 | 0.74 |
| 29485 | 3331   | 3583   | 1.40E-76 | 0.81 |
| 29485 | 3857   | 4195   | 1.10E-35 | 0.87 |
| 29485 | 5043   | 6142   | 1.19E-72 | 0.86 |
| 29485 | 6407   | 7104   | 2.91E-17 | 0.93 |
| 29485 | 56800  | 57204  | 1.97E-23 | 0.92 |
| 29485 | 57682  | 58326  | 3.26E-62 | 0.95 |
| 29485 | 65367  | 65850  | 4.68E-53 | 0.93 |
| 29485 | 116160 | 116497 | 5.83E-04 | 1    |
| 29486 | 11108  | 11469  | 3.92E-04 | 0.86 |
| 29488 | 17935  | 18270  | 1.73E-05 | 0.97 |
| 29488 | 23268  | 23857  | 3.03E-16 | 0.87 |
| 29488 | 25098  | 25371  | 3.69E-07 | 0.88 |
| 29488 | 25545  | 26060  | 4.91E-15 | 0.88 |
| 29488 | 89098  | 89796  | 1.78E-37 | 0.7  |
| 29489 | 5475   | 6254   | 9.95E-32 | 0.78 |
| 29489 | 8220   | 9128   | 1.08E-62 | 0.88 |
| 29489 | 18731  | 19318  | 3.39E-27 | 0.8  |
| 29489 | 27415  | 27825  | 4.58E-25 | 0.78 |
| 29489 | 28502  | 28800  | 6.29E-18 | 0.86 |
| 29489 | 71750  | 71978  | 4.87E-28 | 0.88 |
| 29491 | 18811  | 20672  | 2.09E-67 | 0.74 |
| 29491 | 20930  | 21563  | 2.88E-27 | 0.85 |
| 29496 | 4132   | 4361   | 3.74E-13 | 0.68 |
| 29496 | 7490   | 7823   | 5.18E-28 | 0.85 |
| 29496 | 56637  | 56917  | 1.41E-08 | 0.64 |
| 29496 | 80447  | 80944  | 2.20E-25 | 0.67 |
| 29496 | 92478  | 93099  | 1.03E-37 | 0.93 |
| 29496 | 93587  | 93854  | 6.34E-23 | 0.93 |
| 29496 | 94060  | 94844  | 2.41E-29 | 0.96 |
| 29497 | 10457  | 10767  | 6.19E-10 | 0.81 |
| 29497 | 126547 | 126795 | 1.31E-21 | 0.9  |
| 29497 | 141719 | 142080 | 4.72E-08 | 0.91 |
| 29497 | 176156 | 176369 | 1.34E-06 | 0.79 |
| 29497 | 202109 | 202467 | 4.01E-26 | 0.69 |
| 29501 | 5828   | 6067   | 2.45E-08 | 0.83 |
| 29504 | 11188  | 11681  | 2.50E-13 | 0.81 |
| 29504 | 11778  | 11985  | 1.84E-16 | 0.83 |
| 29505 | 3556   | 3825   | 7.65E-05 | 0.93 |
| 29506 | 3776   | 4664   | 4.29E-19 | 0.62 |
| 29506 | 15117  | 15904  | 3.24E-40 | 0.67 |
| 29506 | 50080  | 50543  | 1.05E-24 | 0.77 |
| 29506 | 64484  | 64785  | 1.37E-24 | 0.92 |
| 29506 | 70184  | 70873  | 5.33E-29 | 0.85 |
| 29506 | 79196  | 80026  | 7.00E-34 | 0.82 |
| 29506 | 89800  | 90174  | 6.04E-03 | 0.82 |
| 29507 | 2839   | 3393   | 4.31E-30 | 0.93 |

|       |       |       |          |      |
|-------|-------|-------|----------|------|
| 29507 | 3695  | 4100  | 4.44E-18 | 0.88 |
| 29508 | 3489  | 3711  | 1.25E-07 | 0.98 |
| 29508 | 5014  | 5266  | 7.71E-15 | 0.87 |
| 29508 | 9532  | 9737  | 6.71E-06 | 0.96 |
| 29508 | 9671  | 9899  | 6.43E-10 | 0.99 |
| 29510 | 3378  | 3628  | 6.06E-07 | 1    |
| 29512 | 3152  | 3438  | 3.73E-04 | 0.91 |
| 29512 | 14378 | 14726 | 2.41E-13 | 0.95 |
| 29513 | 7971  | 8397  | 8.14E-04 | 0.91 |
| 29517 | 19981 | 20202 | 4.43E-13 | 0.9  |
| 29518 | 10001 | 10809 | 8.80E-09 | 0.65 |
| 29520 | 37099 | 37491 | 4.57E-08 | 0.66 |
| 29520 | 39204 | 39554 | 3.20E-12 | 0.71 |
| 29520 | 39793 | 40202 | 5.08E-14 | 0.66 |
| 29520 | 63245 | 63660 | 1.68E-13 | 0.72 |
| 29520 | 64175 | 64516 | 1.67E-15 | 0.82 |
| 29524 | 2546  | 3572  | 3.02E-23 | 0.97 |
| 29528 | 32561 | 32778 | 1.12E-06 | 0.71 |
| 29528 | 34057 | 34360 | 3.08E-06 | 0.82 |
| 29531 | 38384 | 38853 | 1.06E-06 | 0.88 |
| 29531 | 40886 | 41350 | 6.30E-06 | 0.94 |
| 29533 | 5271  | 5574  | 1.85E-04 | 0.79 |
| 29534 | 9770  | 10355 | 2.11E-09 | 0.89 |
| 29542 | 26753 | 27355 | 6.08E-07 | 0.87 |
| 29542 | 33640 | 33905 | 1.76E-05 | 0.83 |
| 29544 | 22079 | 22501 | 2.97E-04 | 0.93 |
| 29544 | 36341 | 37396 | 2.82E-22 | 0.78 |
| 29544 | 52090 | 52719 | 1.06E-10 | 0.94 |
| 29544 | 54817 | 55122 | 7.22E-07 | 0.92 |
| 29544 | 58446 | 58678 | 6.82E-03 | 0.75 |
| 29544 | 59236 | 59532 | 1.02E-13 | 0.93 |
| 29544 | 77294 | 77664 | 1.29E-04 | 0.93 |
| 29544 | 79440 | 79879 | 1.12E-15 | 0.62 |
| 29544 | 81114 | 81740 | 4.77E-16 | 0.82 |
| 29544 | 82209 | 82493 | 1.56E-04 | 0.89 |
| 29547 | 14765 | 15449 | 2.18E-09 | 0.8  |
| 29547 | 18532 | 18737 | 5.52E-18 | 0.92 |
| 29547 | 21993 | 22396 | 2.67E-05 | 0.9  |
| 29548 | 2493  | 3209  | 5.45E-33 | 0.93 |
| 29550 | 20085 | 20449 | 2.84E-04 | 1    |
| 29551 | 2292  | 2610  | 3.00E-05 | 0.84 |
| 29551 | 11090 | 11432 | 1.13E-07 | 0.94 |
| 29556 | 11483 | 11739 | 4.01E-07 | 0.84 |
| 29557 | 18873 | 19075 | 3.63E-16 | 0.82 |
| 29557 | 23387 | 23659 | 9.68E-11 | 0.83 |
| 29557 | 23399 | 23813 | 9.69E-11 | 0.71 |
| 29557 | 31189 | 31459 | 4.43E-12 | 0.84 |
| 29557 | 33087 | 33330 | 8.31E-08 | 0.84 |
| 29560 | 1701  | 1935  | 6.67E-08 | 0.77 |
| 29561 | 19054 | 19332 | 8.87E-07 | 0.94 |
| 29565 | 1337  | 1606  | 1.00E-23 | 0.7  |
| 29568 | 44715 | 44978 | 7.02E-13 | 0.87 |
| 29568 | 48155 | 49132 | 1.33E-32 | 0.86 |

|       |        |        |           |      |
|-------|--------|--------|-----------|------|
| 29568 | 65182  | 65638  | 2.92E-27  | 0.79 |
| 29569 | 10508  | 12007  | 1.70E-70  | 0.89 |
| 29569 | 21556  | 22349  | 5.74E-09  | 0.62 |
| 29569 | 23822  | 24608  | 1.61E-22  | 0.69 |
| 29569 | 30639  | 30887  | 2.11E-18  | 0.87 |
| 29569 | 32315  | 32867  | 1.30E-69  | 0.91 |
| 29569 | 33173  | 33724  | 7.35E-26  | 0.84 |
| 29569 | 39899  | 40476  | 2.05E-23  | 0.76 |
| 29569 | 41274  | 42166  | 5.66E-53  | 0.83 |
| 29569 | 42870  | 44268  | 8.47E-61  | 0.79 |
| 29569 | 46154  | 47051  | 4.41E-72  | 0.88 |
| 29569 | 63119  | 63512  | 6.17E-14  | 0.77 |
| 29576 | 15995  | 16202  | 2.67E-13  | 0.84 |
| 29576 | 34601  | 35307  | 5.98E-53  | 0.93 |
| 29576 | 42682  | 42980  | 2.63E-28  | 0.72 |
| 29576 | 47342  | 47674  | 4.28E-23  | 0.88 |
| 29576 | 53891  | 54238  | 2.49E-20  | 0.78 |
| 29576 | 56420  | 56804  | 5.86E-27  | 0.89 |
| 29576 | 77665  | 78002  | 7.27E-17  | 0.86 |
| 29576 | 87889  | 88430  | 4.86E-32  | 0.91 |
| 29576 | 90977  | 91369  | 4.94E-11  | 0.9  |
| 29576 | 93657  | 95107  | 6.42E-116 | 0.86 |
| 29576 | 102680 | 102968 | 1.29E-08  | 0.87 |
| 29576 | 111012 | 111454 | 1.15E-06  | 0.92 |
| 29577 | 4168   | 4446   | 3.85E-09  | 0.62 |
| 29577 | 9600   | 9903   | 3.78E-55  | 0.9  |
| 29577 | 10740  | 12128  | 2.05E-82  | 0.9  |
| 29577 | 12512  | 13839  | 1.09E-45  | 0.87 |
| 29577 | 14147  | 14423  | 1.01E-14  | 0.78 |
| 29577 | 17206  | 17519  | 3.66E-15  | 0.77 |
| 29577 | 18712  | 19180  | 8.04E-37  | 0.8  |
| 29577 | 20706  | 20985  | 1.26E-16  | 0.77 |
| 29577 | 22572  | 22801  | 2.15E-17  | 0.84 |
| 29577 | 24523  | 25160  | 1.36E-40  | 0.85 |
| 29577 | 27541  | 28193  | 5.59E-38  | 0.72 |
| 29577 | 45326  | 45690  | 9.48E-12  | 0.8  |
| 29577 | 50956  | 51687  | 1.13E-51  | 0.87 |
| 29577 | 52419  | 52963  | 2.65E-28  | 0.94 |
| 29577 | 56495  | 56835  | 5.26E-25  | 0.89 |
| 29577 | 61570  | 62553  | 3.27E-35  | 0.94 |
| 29577 | 68952  | 69356  | 4.31E-22  | 0.71 |
| 29577 | 69711  | 70675  | 5.02E-61  | 0.87 |
| 29577 | 79075  | 79349  | 2.20E-24  | 0.82 |
| 29577 | 79744  | 80026  | 4.46E-13  | 0.93 |
| 29577 | 145322 | 145811 | 1.33E-09  | 0.85 |
| 29577 | 204624 | 205695 | 6.86E-51  | 0.64 |
| 29577 | 226734 | 227163 | 4.28E-14  | 0.79 |
| 29578 | 65554  | 65970  | 7.57E-13  | 0.84 |
| 29578 | 74386  | 74663  | 1.09E-11  | 0.94 |
| 29578 | 74645  | 75246  | 7.37E-09  | 0.89 |
| 29578 | 81575  | 81785  | 9.28E-11  | 0.7  |
| 29578 | 158894 | 159351 | 2.76E-63  | 0.94 |
| 29578 | 168705 | 168919 | 4.14E-52  | 0.97 |

|       |        |        |           |      |
|-------|--------|--------|-----------|------|
| 29578 | 188099 | 188369 | 7.64E-12  | 0.96 |
| 29578 | 191301 | 191637 | 1.24E-57  | 0.9  |
| 29578 | 193825 | 194396 | 2.07E-45  | 0.89 |
| 29578 | 194709 | 195047 | 5.08E-20  | 0.93 |
| 29578 | 196536 | 196798 | 3.39E-43  | 0.92 |
| 29578 | 205050 | 205423 | 4.58E-25  | 0.89 |
| 29578 | 254830 | 255245 | 5.35E-10  | 0.89 |
| 29578 | 257007 | 257296 | 6.86E-12  | 0.87 |
| 29579 | 7615   | 8505   | 2.94E-45  | 0.84 |
| 29579 | 17364  | 17826  | 2.20E-22  | 0.8  |
| 29579 | 27882  | 28137  | 1.43E-08  | 0.91 |
| 29579 | 37416  | 37878  | 8.24E-36  | 0.88 |
| 29579 | 38212  | 38529  | 1.45E-36  | 0.89 |
| 29579 | 38843  | 39679  | 8.14E-55  | 0.89 |
| 29579 | 43976  | 44311  | 9.65E-17  | 0.84 |
| 29579 | 66851  | 67389  | 2.74E-18  | 0.86 |
| 29579 | 68657  | 69567  | 9.85E-57  | 0.85 |
| 29579 | 69983  | 70296  | 3.53E-51  | 0.86 |
| 29579 | 70712  | 70969  | 7.61E-19  | 0.81 |
| 29579 | 100417 | 101966 | 2.74E-39  | 0.73 |
| 29579 | 125993 | 126276 | 4.09E-08  | 0.97 |
| 29580 | 17221  | 17501  | 1.62E-03  | 0.78 |
| 29580 | 28302  | 28910  | 7.84E-48  | 0.92 |
| 29580 | 32106  | 32407  | 1.87E-11  | 0.9  |
| 29580 | 48156  | 49763  | 1.67E-94  | 0.92 |
| 29580 | 108688 | 109009 | 7.18E-06  | 0.89 |
| 29580 | 114505 | 114864 | 2.33E-09  | 0.86 |
| 29580 | 140469 | 140683 | 9.54E-04  | 0.93 |
| 29580 | 195496 | 195745 | 2.34E-06  | 1    |
| 29580 | 246137 | 246876 | 1.14E-39  | 0.82 |
| 29580 | 264068 | 264296 | 2.62E-17  | 0.85 |
| 29581 | 457    | 983    | 1.40E-24  | 0.75 |
| 29581 | 1434   | 2562   | 6.28E-49  | 0.86 |
| 29581 | 6319   | 6793   | 3.44E-24  | 0.89 |
| 29581 | 7965   | 8346   | 1.14E-28  | 0.98 |
| 29581 | 12483  | 12949  | 7.44E-14  | 0.86 |
| 29581 | 28705  | 29475  | 1.55E-28  | 0.73 |
| 29581 | 29689  | 30561  | 2.61E-65  | 0.96 |
| 29581 | 61752  | 62478  | 2.35E-103 | 0.92 |
| 29581 | 63066  | 63295  | 1.33E-13  | 0.88 |
| 29581 | 90782  | 91585  | 7.78E-22  | 0.68 |
| 29581 | 94437  | 95066  | 3.65E-38  | 0.91 |
| 29581 | 98195  | 98800  | 8.55E-24  | 0.92 |
| 29581 | 106342 | 106840 | 8.65E-29  | 0.86 |
| 29581 | 109577 | 109811 | 1.16E-16  | 0.91 |
| 29581 | 113422 | 114046 | 2.65E-15  | 0.72 |
| 29581 | 114299 | 114874 | 4.06E-36  | 0.74 |
| 29581 | 117615 | 117884 | 4.55E-31  | 0.91 |
| 29581 | 122094 | 122473 | 3.48E-20  | 0.86 |
| 29581 | 124618 | 125248 | 1.58E-38  | 0.94 |
| 29581 | 126940 | 128294 | 2.66E-27  | 0.6  |
| 29581 | 130585 | 131225 | 5.28E-99  | 0.87 |
| 29581 | 134904 | 137234 | 2.76E-134 | 0.93 |

|       |        |        |           |      |
|-------|--------|--------|-----------|------|
| 29581 | 137467 | 137847 | 6.04E-57  | 0.9  |
| 29581 | 141539 | 142168 | 1.23E-15  | 0.83 |
| 29581 | 142390 | 143080 | 1.08E-56  | 0.91 |
| 29581 | 143906 | 144168 | 1.96E-09  | 0.75 |
| 29582 | 10758  | 10973  | 2.85E-30  | 0.91 |
| 29582 | 11349  | 11576  | 8.68E-21  | 0.88 |
| 29582 | 13140  | 13457  | 6.29E-31  | 0.97 |
| 29582 | 43232  | 43699  | 1.48E-29  | 0.9  |
| 29582 | 113927 | 115079 | 1.09E-42  | 0.81 |
| 29582 | 121529 | 122013 | 3.33E-21  | 0.83 |
| 29583 | 8902   | 9325   | 1.16E-17  | 0.66 |
| 29583 | 13582  | 14958  | 9.51E-39  | 0.76 |
| 29583 | 15188  | 15472  | 1.93E-17  | 0.87 |
| 29583 | 15857  | 16357  | 3.86E-41  | 0.8  |
| 29583 | 16631  | 16891  | 1.41E-36  | 0.96 |
| 29583 | 29672  | 29903  | 1.87E-13  | 0.93 |
| 29583 | 101492 | 102420 | 2.82E-14  | 0.89 |
| 29583 | 114795 | 115306 | 1.40E-30  | 0.96 |
| 29583 | 115706 | 116154 | 3.96E-11  | 0.81 |
| 29584 | 17569  | 17815  | 3.01E-06  | 0.78 |
| 29584 | 24082  | 24463  | 2.34E-17  | 0.74 |
| 29584 | 41325  | 42051  | 1.14E-36  | 0.77 |
| 29584 | 45381  | 46271  | 5.11E-27  | 0.75 |
| 29584 | 53997  | 54725  | 3.00E-31  | 0.84 |
| 29584 | 54041  | 55016  | 7.93E-40  | 0.84 |
| 29584 | 71281  | 71604  | 8.86E-30  | 0.86 |
| 29584 | 93730  | 94858  | 5.97E-31  | 0.75 |
| 29585 | 21986  | 22902  | 1.04E-18  | 0.79 |
| 29585 | 46786  | 47718  | 1.14E-69  | 0.9  |
| 29585 | 64830  | 65244  | 9.91E-37  | 0.92 |
| 29585 | 92391  | 94935  | 6.63E-152 | 0.79 |
| 29585 | 98331  | 98551  | 1.74E-08  | 0.7  |
| 29585 | 103723 | 104059 | 3.20E-35  | 0.91 |
| 29585 | 106038 | 106545 | 8.10E-30  | 0.89 |
| 29585 | 106754 | 107021 | 3.08E-25  | 0.93 |
| 29585 | 107278 | 107585 | 1.15E-13  | 0.87 |
| 29585 | 108027 | 109662 | 1.95E-105 | 0.91 |
| 29585 | 130191 | 130533 | 6.25E-13  | 0.82 |
| 29585 | 138985 | 139586 | 9.24E-46  | 0.95 |
| 29585 | 143450 | 144038 | 1.90E-17  | 0.81 |
| 29585 | 169313 | 170725 | 1.29E-48  | 0.85 |
| 29585 | 189372 | 190355 | 4.55E-40  | 0.76 |
| 29585 | 190672 | 191727 | 2.42E-46  | 0.71 |
| 29585 | 197239 | 197659 | 6.51E-29  | 0.74 |
| 29585 | 199078 | 200706 | 1.01E-90  | 0.75 |
| 29585 | 210370 | 210912 | 1.85E-43  | 0.79 |
| 29585 | 221089 | 222828 | 2.25E-74  | 0.72 |
| 29585 | 223150 | 224285 | 1.80E-92  | 0.88 |
| 29585 | 224489 | 226664 | 3.83E-181 | 0.84 |
| 29585 | 240618 | 241495 | 3.18E-43  | 0.75 |
| 29585 | 249643 | 249990 | 1.54E-22  | 0.92 |
| 29585 | 250713 | 251993 | 1.27E-124 | 0.88 |
| 29585 | 252217 | 252838 | 8.87E-67  | 0.93 |

|       |        |        |           |      |
|-------|--------|--------|-----------|------|
| 29585 | 253892 | 256684 | 7.30E-300 | 0.95 |
| 29585 | 257298 | 257522 | 2.21E-23  | 0.74 |
| 29586 | 8865   | 9320   | 1.89E-05  | 0.81 |
| 29586 | 13463  | 14644  | 1.99E-36  | 0.75 |
| 29586 | 15147  | 15588  | 6.18E-32  | 0.93 |
| 29586 | 20224  | 20477  | 5.67E-06  | 0.74 |
| 29586 | 28437  | 29511  | 1.46E-63  | 0.74 |
| 29586 | 31593  | 32249  | 1.35E-21  | 0.8  |
| 29586 | 45335  | 45708  | 5.20E-13  | 0.83 |
| 29586 | 77930  | 78515  | 2.30E-32  | 0.66 |
| 29586 | 78739  | 79798  | 2.15E-79  | 0.94 |
| 29586 | 95241  | 95574  | 1.94E-72  | 0.94 |
| 29586 | 114497 | 114966 | 9.54E-09  | 0.83 |
| 29586 | 116003 | 116228 | 4.09E-08  | 0.88 |
| 29586 | 124117 | 124999 | 2.05E-13  | 0.61 |
| 29586 | 138587 | 139324 | 8.98E-36  | 0.61 |
| 29586 | 140833 | 141050 | 3.81E-34  | 0.9  |
| 29586 | 154336 | 155132 | 1.16E-30  | 0.62 |
| 29586 | 186344 | 186892 | 1.11E-72  | 0.94 |
| 29586 | 187156 | 187762 | 2.79E-59  | 0.9  |
| 29586 | 189125 | 189388 | 6.73E-23  | 0.85 |
| 29586 | 190786 | 191213 | 1.13E-14  | 0.83 |
| 29586 | 221705 | 221950 | 1.14E-25  | 0.82 |
| 29586 | 227464 | 228180 | 1.33E-44  | 0.85 |
| 29586 | 228400 | 228946 | 4.68E-48  | 0.95 |
| 29586 | 230617 | 230894 | 6.60E-16  | 0.7  |
| 29586 | 231172 | 231650 | 3.12E-16  | 0.85 |
| 29586 | 233257 | 233854 | 3.01E-33  | 0.72 |
| 29586 | 251037 | 251311 | 5.32E-32  | 0.74 |
| 29586 | 256192 | 256443 | 1.15E-06  | 0.79 |
| 29586 | 259722 | 259995 | 3.69E-16  | 0.9  |
| 29587 | 5138   | 6232   | 3.91E-129 | 0.96 |
| 29587 | 6433   | 6894   | 1.52E-19  | 0.92 |
| 29587 | 7230   | 7814   | 5.32E-22  | 0.91 |
| 29587 | 30971  | 31577  | 2.01E-08  | 0.83 |
| 29587 | 70281  | 70945  | 5.36E-16  | 0.81 |
| 29587 | 71680  | 72072  | 1.56E-68  | 0.96 |
| 29587 | 114177 | 114520 | 1.66E-31  | 0.82 |
| 29588 | 31097  | 31681  | 3.09E-08  | 0.76 |
| 29588 | 37688  | 38195  | 3.69E-34  | 0.9  |
| 29588 | 39424  | 40266  | 2.67E-46  | 0.83 |
| 29588 | 44296  | 44783  | 3.57E-38  | 0.91 |
| 29588 | 72740  | 73692  | 1.65E-46  | 0.91 |
| 29588 | 73996  | 74284  | 2.73E-31  | 0.97 |
| 29588 | 76500  | 76804  | 8.94E-17  | 0.9  |
| 29588 | 77309  | 78824  | 3.55E-53  | 0.84 |
| 29588 | 83431  | 83740  | 4.88E-35  | 0.96 |
| 29588 | 83978  | 84478  | 2.21E-43  | 0.8  |
| 29588 | 94842  | 95696  | 5.54E-21  | 0.85 |
| 29588 | 96233  | 97260  | 7.02E-104 | 0.84 |
| 29588 | 97691  | 98187  | 2.23E-120 | 0.95 |
| 29588 | 98479  | 99260  | 4.23E-89  | 0.86 |
| 29588 | 135248 | 135679 | 7.65E-33  | 0.94 |

|       |        |        |           |      |
|-------|--------|--------|-----------|------|
| 29588 | 168579 | 169030 | 1.88E-26  | 0.9  |
| 29588 | 170759 | 171395 | 1.57E-66  | 0.93 |
| 29588 | 208024 | 209129 | 4.05E-36  | 0.61 |
| 29589 | 8561   | 8821   | 1.35E-13  | 0.8  |
| 29589 | 43346  | 43687  | 6.75E-16  | 0.77 |
| 29589 | 57639  | 57995  | 6.20E-27  | 0.8  |
| 29589 | 58360  | 58602  | 7.07E-15  | 0.83 |
| 29589 | 61295  | 61698  | 5.08E-26  | 0.91 |
| 29589 | 70913  | 72884  | 6.51E-151 | 0.88 |
| 29589 | 80923  | 81715  | 4.11E-44  | 0.6  |
| 29589 | 81925  | 82714  | 7.37E-48  | 0.82 |
| 29589 | 85997  | 86354  | 1.30E-16  | 0.83 |
| 29589 | 121216 | 121552 | 4.00E-43  | 0.81 |
| 29589 | 121769 | 122052 | 6.91E-22  | 0.7  |
| 29589 | 132933 | 133605 | 5.34E-23  | 0.85 |
| 29589 | 145018 | 145614 | 1.36E-41  | 0.68 |
| 29589 | 154966 | 157664 | 1.67E-149 | 0.69 |
| 29589 | 161889 | 162235 | 1.45E-50  | 0.81 |
| 29589 | 241742 | 242965 | 2.96E-52  | 0.85 |
| 29589 | 243952 | 244261 | 7.45E-33  | 0.95 |
| 29589 | 248550 | 249082 | 1.04E-29  | 0.91 |
| 29589 | 316528 | 317132 | 1.40E-43  | 0.81 |
| 29589 | 319542 | 320070 | 3.14E-37  | 0.9  |
| 29589 | 335939 | 336332 | 8.41E-29  | 0.66 |
| 29589 | 365345 | 365727 | 2.48E-15  | 0.86 |
| 29589 | 376167 | 376523 | 5.03E-16  | 0.87 |
| 29589 | 394500 | 394783 | 2.43E-10  | 0.68 |
| 29589 | 421038 | 421358 | 9.59E-19  | 0.64 |
| 29589 | 440692 | 441287 | 7.31E-22  | 0.84 |
| 29589 | 444163 | 445046 | 3.96E-38  | 0.85 |
| 29589 | 445617 | 446162 | 2.71E-27  | 0.82 |
| 29589 | 448206 | 449011 | 4.36E-42  | 0.9  |
| 29589 | 449298 | 450134 | 7.30E-47  | 0.91 |
| 29589 | 450350 | 450685 | 4.11E-15  | 0.89 |
| 29589 | 451864 | 452822 | 2.64E-59  | 0.81 |
| 29589 | 453075 | 453285 | 2.73E-50  | 0.86 |
| 29589 | 475428 | 475683 | 6.77E-11  | 0.75 |
| 29589 | 490941 | 492117 | 3.45E-42  | 0.79 |
| 29589 | 492718 | 493162 | 1.71E-18  | 0.79 |
| 29589 | 507667 | 508173 | 4.03E-28  | 0.78 |
| 29589 | 513534 | 514720 | 1.69E-31  | 0.7  |
| 29589 | 523639 | 524422 | 1.09E-34  | 0.66 |
| 29589 | 525049 | 525476 | 1.49E-33  | 0.89 |
| 29589 | 525939 | 526511 | 1.81E-26  | 0.91 |
| 29590 | 13447  | 13894  | 8.43E-27  | 0.87 |
| 29590 | 40173  | 40652  | 3.26E-29  | 0.91 |
| 29590 | 75367  | 75724  | 2.40E-15  | 0.91 |
| 29590 | 142415 | 142733 | 4.03E-14  | 0.94 |
| 29590 | 150089 | 150430 | 7.27E-10  | 0.85 |
| 29590 | 153034 | 153460 | 1.86E-05  | 0.81 |
| 29590 | 167456 | 167708 | 5.14E-06  | 0.88 |
| 29591 | 19139  | 19457  | 4.73E-08  | 0.94 |
| 29591 | 27842  | 28133  | 1.08E-09  | 0.75 |

|       |        |        |           |      |
|-------|--------|--------|-----------|------|
| 29591 | 80118  | 80445  | 4.21E-24  | 0.91 |
| 29591 | 83906  | 84189  | 6.01E-49  | 0.94 |
| 29591 | 88727  | 88979  | 1.58E-55  | 0.81 |
| 29591 | 89244  | 89891  | 1.99E-82  | 0.9  |
| 29591 | 90412  | 91077  | 8.16E-60  | 0.87 |
| 29591 | 91559  | 92145  | 1.26E-26  | 0.88 |
| 29591 | 92440  | 92807  | 1.76E-30  | 0.91 |
| 29592 | 6779   | 7752   | 4.38E-44  | 0.91 |
| 29592 | 8010   | 8434   | 1.27E-11  | 0.94 |
| 29592 | 26223  | 27754  | 3.90E-65  | 0.77 |
| 29592 | 34090  | 34516  | 7.10E-46  | 0.76 |
| 29592 | 39171  | 39878  | 4.03E-56  | 0.8  |
| 29593 | 141333 | 141727 | 4.42E-17  | 0.88 |
| 29593 | 142023 | 142377 | 1.87E-24  | 0.93 |
| 29593 | 142780 | 143354 | 3.56E-53  | 0.93 |
| 29593 | 146071 | 147679 | 3.29E-111 | 0.94 |
| 29593 | 148020 | 148595 | 1.38E-31  | 0.75 |
| 29593 | 207792 | 208172 | 4.52E-97  | 0.83 |
| 29593 | 243455 | 243776 | 1.00E-19  | 0.91 |
| 29593 | 245190 | 246142 | 1.09E-39  | 0.8  |
| 29593 | 247628 | 249031 | 6.90E-38  | 0.62 |
| 29594 | 11395  | 12432  | 1.12E-62  | 0.87 |
| 29594 | 13143  | 13487  | 2.25E-28  | 0.93 |
| 29594 | 31474  | 31716  | 1.72E-13  | 0.89 |
| 29594 | 31692  | 31911  | 1.95E-22  | 0.88 |
| 29594 | 44770  | 44970  | 2.50E-14  | 0.93 |
| 29594 | 54287  | 54740  | 7.35E-06  | 0.67 |
| 29594 | 67479  | 67858  | 5.27E-06  | 0.87 |
| 29594 | 73029  | 73318  | 1.41E-05  | 0.95 |
| 29594 | 120130 | 120586 | 6.57E-05  | 0.88 |
| 29594 | 165356 | 166018 | 1.47E-06  | 0.92 |
| 29594 | 185231 | 185532 | 7.09E-05  | 0.92 |
| 29594 | 209912 | 210559 | 2.44E-34  | 0.91 |
| 29594 | 212497 | 213110 | 8.05E-78  | 0.95 |
| 29594 | 228003 | 228204 | 4.51E-08  | 0.89 |
| 29595 | 38922  | 40167  | 6.20E-21  | 0.73 |
| 29595 | 70776  | 71196  | 2.13E-39  | 0.95 |
| 29595 | 75580  | 75829  | 7.78E-14  | 0.76 |
| 29595 | 76526  | 77490  | 1.65E-58  | 0.86 |
| 29595 | 77830  | 78539  | 9.38E-54  | 0.89 |
| 29595 | 78992  | 79440  | 2.39E-33  | 0.86 |
| 29595 | 80239  | 80603  | 1.96E-37  | 0.95 |
| 29595 | 81123  | 81794  | 1.83E-42  | 0.8  |
| 29595 | 82162  | 82420  | 1.58E-32  | 0.89 |
| 29595 | 84388  | 84834  | 1.93E-33  | 0.85 |
| 29595 | 85782  | 86648  | 8.99E-44  | 0.61 |
| 29595 | 90258  | 90843  | 1.26E-90  | 0.67 |
| 29595 | 92884  | 93369  | 1.47E-12  | 0.9  |
| 29595 | 108885 | 109760 | 3.28E-42  | 0.82 |
| 29595 | 128201 | 129000 | 4.28E-60  | 0.82 |
| 29595 | 131630 | 132776 | 6.76E-42  | 0.8  |
| 29595 | 149296 | 149652 | 8.79E-25  | 0.62 |
| 29595 | 149864 | 150479 | 3.50E-45  | 0.7  |



|       |        |        |          |      |
|-------|--------|--------|----------|------|
| 29595 | 162034 | 162470 | 2.41E-73 | 0.87 |
| 29595 | 165899 | 166251 | 6.33E-16 | 0.73 |
| 29596 | 59683  | 60895  | 4.66E-68 | 0.79 |
| 29596 | 74268  | 74485  | 1.65E-43 | 0.79 |
| 29596 | 85111  | 85484  | 7.03E-09 | 0.75 |
| 29596 | 86112  | 86874  | 3.43E-19 | 0.78 |
| 29596 | 87311  | 87831  | 1.83E-34 | 0.86 |
| 29596 | 89189  | 89481  | 1.01E-10 | 0.85 |
| 29596 | 91175  | 91469  | 2.05E-19 | 0.86 |
| 29596 | 92449  | 92845  | 6.73E-12 | 0.64 |
| 29596 | 111977 | 112937 | 2.74E-36 | 0.79 |
| 29596 | 116355 | 117354 | 9.41E-39 | 0.6  |
| 29596 | 118138 | 118367 | 4.11E-42 | 0.81 |
| 29596 | 118676 | 119323 | 1.16E-24 | 0.86 |
| 29596 | 120231 | 120725 | 4.57E-20 | 0.78 |
| 29596 | 120957 | 121515 | 8.60E-31 | 0.81 |
| 29596 | 158705 | 159168 | 1.82E-13 | 0.81 |
| 29596 | 193343 | 193805 | 3.75E-16 | 0.81 |
| 29596 | 197276 | 197664 | 2.42E-29 | 0.8  |
| 29596 | 199298 | 199647 | 4.21E-27 | 0.82 |
| 29596 | 201526 | 201787 | 4.02E-15 | 0.81 |
| 29596 | 212038 | 212284 | 1.78E-30 | 0.99 |
| 29596 | 231653 | 233044 | 4.73E-93 | 0.86 |
| 29596 | 237030 | 237799 | 2.50E-65 | 0.89 |
| 29596 | 239268 | 239726 | 4.40E-10 | 0.8  |
| 29596 | 241202 | 241742 | 2.34E-12 | 0.78 |
| 29596 | 264112 | 264399 | 3.85E-56 | 0.88 |
| 29596 | 265366 | 265668 | 3.08E-36 | 0.9  |
| 29596 | 266388 | 266641 | 4.03E-82 | 0.89 |
| 29596 | 269509 | 270281 | 2.75E-33 | 0.87 |
| 29596 | 271854 | 273411 | 5.34E-53 | 0.63 |
| 29596 | 278906 | 279518 | 6.33E-20 | 0.82 |
| 29596 | 281904 | 283091 | 4.10E-68 | 0.89 |
| 29596 | 284769 | 285863 | 4.54E-54 | 0.81 |
| 29596 | 288069 | 288638 | 1.06E-40 | 0.93 |
| 29596 | 295561 | 296164 | 6.73E-23 | 0.82 |
| 29596 | 296516 | 296872 | 4.93E-20 | 0.92 |
| 29596 | 299041 | 299254 | 1.20E-18 | 0.83 |
| 29596 | 304393 | 304888 | 6.10E-18 | 0.85 |
| 29596 | 310818 | 311264 | 1.81E-69 | 0.81 |
| 29597 | 3520   | 4247   | 4.44E-27 | 0.63 |
| 29597 | 11291  | 12189  | 1.80E-39 | 0.86 |
| 29597 | 12421  | 13271  | 1.08E-32 | 0.64 |
| 29597 | 22801  | 23668  | 2.96E-30 | 0.78 |
| 29597 | 23239  | 24184  | 4.65E-27 | 0.81 |
| 29597 | 26346  | 26646  | 1.18E-30 | 0.9  |
| 29597 | 27444  | 27971  | 4.31E-18 | 0.8  |
| 29597 | 39097  | 39406  | 3.93E-19 | 0.63 |
| 29597 | 77862  | 78143  | 3.86E-17 | 0.85 |
| 29597 | 81746  | 82739  | 5.90E-45 | 0.78 |
| 29597 | 84844  | 85078  | 1.52E-32 | 0.9  |
| 29597 | 85836  | 86667  | 6.87E-26 | 0.76 |
| 29597 | 88811  | 90430  | 2.52E-74 | 0.81 |

|       |        |        |           |      |
|-------|--------|--------|-----------|------|
| 29597 | 125472 | 125909 | 2.56E-24  | 0.87 |
| 29597 | 132766 | 133583 | 1.30E-69  | 0.88 |
| 29597 | 134441 | 134958 | 9.02E-65  | 0.89 |
| 29597 | 137176 | 137535 | 4.65E-70  | 0.91 |
| 29598 | 8431   | 9044   | 2.27E-52  | 0.84 |
| 29598 | 9469   | 10421  | 5.17E-62  | 0.87 |
| 29598 | 10666  | 11193  | 3.60E-48  | 0.84 |
| 29598 | 38080  | 38881  | 4.42E-75  | 0.91 |
| 29598 | 39098  | 39453  | 8.40E-53  | 0.84 |
| 29598 | 39952  | 40277  | 1.10E-29  | 0.73 |
| 29598 | 40976  | 41392  | 1.72E-16  | 0.75 |
| 29598 | 42016  | 42367  | 9.46E-70  | 0.87 |
| 29598 | 60652  | 61404  | 1.38E-37  | 0.86 |
| 29598 | 103417 | 103868 | 4.00E-23  | 0.77 |
| 29598 | 144982 | 145792 | 1.12E-29  | 0.82 |
| 29599 | 14728  | 15181  | 2.54E-27  | 0.87 |
| 29599 | 44885  | 45944  | 3.04E-52  | 0.85 |
| 29599 | 84942  | 85329  | 6.96E-34  | 0.81 |
| 29599 | 85080  | 85341  | 2.90E-26  | 0.81 |
| 29599 | 85649  | 86162  | 2.77E-17  | 0.81 |
| 29600 | 11924  | 12780  | 4.36E-17  | 0.82 |
| 29600 | 14906  | 15313  | 7.69E-08  | 0.75 |
| 29600 | 25680  | 25880  | 1.54E-33  | 0.92 |
| 29600 | 57670  | 57995  | 2.38E-26  | 0.9  |
| 29600 | 59520  | 60084  | 1.06E-19  | 0.89 |
| 29600 | 82155  | 82503  | 2.16E-14  | 0.82 |
| 29600 | 112986 | 113328 | 3.76E-49  | 0.67 |
| 29600 | 124457 | 125313 | 1.18E-65  | 0.96 |
| 29600 | 143692 | 144338 | 2.23E-73  | 0.75 |
| 29600 | 144556 | 145614 | 2.31E-190 | 0.91 |
| 29600 | 152415 | 152720 | 3.76E-33  | 0.96 |
| 29600 | 210317 | 211050 | 1.72E-35  | 0.85 |
| 29600 | 212889 | 213323 | 4.70E-22  | 0.85 |
| 29600 | 219601 | 220098 | 3.33E-73  | 0.95 |
| 29600 | 241785 | 242211 | 1.42E-05  | 0.94 |
| 29600 | 263320 | 264389 | 3.97E-50  | 0.79 |
| 29600 | 265016 | 266525 | 6.38E-94  | 0.76 |
| 29600 | 270554 | 271215 | 1.23E-25  | 0.71 |
| 29600 | 275342 | 275758 | 4.12E-33  | 0.89 |
| 29600 | 276148 | 276769 | 1.86E-42  | 0.95 |
| 29600 | 303154 | 305039 | 3.19E-111 | 0.8  |
| 29600 | 315486 | 315716 | 9.15E-17  | 0.92 |
| 29600 | 337887 | 338105 | 3.69E-13  | 0.94 |
| 29600 | 340596 | 341240 | 1.42E-94  | 0.88 |
| 29600 | 350858 | 351408 | 5.03E-16  | 0.87 |
| 29600 | 358209 | 358777 | 9.54E-42  | 0.92 |
| 29600 | 360184 | 360856 | 3.88E-20  | 0.88 |
| 29600 | 363659 | 364017 | 1.10E-13  | 0.67 |
| 29600 | 420223 | 420819 | 2.06E-58  | 0.97 |
| 29600 | 421082 | 421405 | 1.21E-57  | 0.95 |
| 29600 | 425620 | 425952 | 9.67E-35  | 0.84 |
| 29600 | 447456 | 447771 | 4.68E-21  | 0.87 |
| 29600 | 448143 | 448677 | 1.08E-39  | 0.87 |

|       |        |        |           |      |
|-------|--------|--------|-----------|------|
| 29600 | 448956 | 450531 | 1.27E-53  | 0.61 |
| 29600 | 479707 | 480189 | 2.53E-61  | 0.94 |
| 29600 | 480624 | 481661 | 3.97E-99  | 0.96 |
| 29600 | 489058 | 489514 | 8.08E-85  | 0.88 |
| 29600 | 496375 | 496671 | 5.30E-28  | 0.87 |
| 29600 | 497285 | 497876 | 1.52E-32  | 0.89 |
| 29600 | 498749 | 499314 | 7.24E-60  | 0.94 |
| 29601 | 16186  | 16419  | 2.52E-07  | 0.73 |
| 29601 | 17442  | 17815  | 2.20E-21  | 0.95 |
| 29601 | 23547  | 24389  | 1.24E-28  | 0.83 |
| 29601 | 78950  | 79183  | 1.58E-10  | 0.86 |
| 29601 | 99623  | 99887  | 3.31E-21  | 0.89 |
| 29601 | 132747 | 132985 | 4.38E-30  | 0.75 |
| 29601 | 136638 | 137776 | 3.43E-51  | 0.94 |
| 29601 | 149071 | 149728 | 1.75E-43  | 0.87 |
| 29601 | 153683 | 153958 | 1.57E-19  | 0.75 |
| 29601 | 167973 | 168346 | 6.28E-14  | 0.82 |
| 29601 | 170071 | 170900 | 1.07E-30  | 0.67 |
| 29602 | 6892   | 7872   | 5.64E-31  | 0.88 |
| 29602 | 8515   | 8728   | 4.18E-17  | 0.89 |
| 29602 | 16067  | 16451  | 6.54E-04  | 0.72 |
| 29602 | 21627  | 22626  | 5.77E-24  | 0.83 |
| 29602 | 59740  | 61754  | 1.07E-153 | 0.91 |
| 29602 | 63635  | 64368  | 2.38E-13  | 0.83 |
| 29602 | 74778  | 75383  | 2.34E-18  | 0.8  |
| 29602 | 95367  | 95784  | 1.96E-51  | 0.72 |
| 29602 | 101074 | 101633 | 1.73E-21  | 0.8  |
| 29602 | 121330 | 122207 | 1.55E-41  | 0.78 |
| 29602 | 126495 | 127942 | 2.39E-108 | 0.94 |
| 29602 | 130464 | 130726 | 1.11E-20  | 0.7  |
| 29602 | 146466 | 146809 | 1.36E-12  | 0.92 |
| 29602 | 154060 | 154343 | 2.16E-12  | 0.72 |
| 29602 | 168977 | 169368 | 3.45E-15  | 0.84 |
| 29602 | 169597 | 169826 | 5.18E-35  | 0.97 |
| 29603 | 20025  | 20759  | 5.45E-51  | 0.9  |
| 29603 | 28384  | 29308  | 2.51E-34  | 0.61 |
| 29603 | 109073 | 110061 | 5.87E-66  | 0.65 |
| 29603 | 115533 | 115790 | 5.96E-19  | 0.71 |
| 29603 | 116226 | 116610 | 2.12E-22  | 0.86 |
| 29603 | 156788 | 157297 | 2.59E-38  | 0.92 |
| 29603 | 177967 | 178636 | 1.99E-31  | 0.67 |
| 29604 | 19799  | 20084  | 3.67E-10  | 0.85 |
| 29605 | 3103   | 3335   | 1.50E-05  | 0.87 |
| 29605 | 10508  | 11162  | 3.58E-05  | 0.94 |
| 29605 | 43157  | 43712  | 5.59E-06  | 0.64 |
| 29606 | 20177  | 20886  | 5.89E-30  | 0.89 |
| 29606 | 21092  | 21374  | 3.60E-84  | 0.93 |
| 29606 | 23025  | 23267  | 2.66E-49  | 0.96 |
| 29606 | 35567  | 35928  | 3.66E-12  | 0.92 |
| 29606 | 43167  | 43733  | 2.36E-93  | 0.94 |
| 29606 | 57721  | 58672  | 5.47E-31  | 0.75 |
| 29606 | 63096  | 63809  | 1.10E-33  | 0.88 |
| 29606 | 66526  | 67122  | 3.03E-30  | 0.68 |

|       |        |        |           |      |
|-------|--------|--------|-----------|------|
| 29606 | 95464  | 96319  | 1.45E-25  | 0.75 |
| 29606 | 109376 | 109618 | 5.18E-40  | 0.9  |
| 29607 | 25626  | 25880  | 2.64E-37  | 0.97 |
| 29607 | 33149  | 33713  | 1.80E-30  | 0.85 |
| 29607 | 53436  | 53895  | 7.24E-24  | 0.95 |
| 29607 | 92138  | 92745  | 1.01E-17  | 0.69 |
| 29607 | 94653  | 95510  | 6.74E-38  | 0.77 |
| 29607 | 96514  | 97076  | 2.36E-41  | 0.83 |
| 29607 | 105460 | 105761 | 8.31E-20  | 0.78 |
| 29607 | 108701 | 109018 | 4.15E-17  | 0.89 |
| 29607 | 111818 | 112497 | 2.51E-15  | 0.65 |
| 29607 | 115007 | 115550 | 3.57E-20  | 0.89 |
| 29607 | 123805 | 124452 | 9.14E-30  | 0.92 |
| 29607 | 142243 | 142543 | 1.10E-12  | 0.84 |
| 29607 | 142951 | 143680 | 1.55E-27  | 0.89 |
| 29608 | 23379  | 23731  | 7.50E-09  | 0.91 |
| 29608 | 26812  | 27304  | 1.58E-43  | 0.96 |
| 29608 | 30804  | 31404  | 9.93E-12  | 0.77 |
| 29608 | 61098  | 61674  | 7.37E-41  | 0.76 |
| 29608 | 62240  | 62513  | 2.99E-47  | 0.88 |
| 29608 | 87745  | 88789  | 4.58E-79  | 0.85 |
| 29608 | 99250  | 99523  | 8.33E-19  | 0.71 |
| 29608 | 120757 | 121054 | 3.49E-35  | 0.95 |
| 29608 | 122580 | 124085 | 7.22E-65  | 0.84 |
| 29608 | 124327 | 124706 | 2.63E-24  | 0.6  |
| 29609 | 22552  | 23389  | 8.36E-38  | 0.87 |
| 29609 | 25589  | 27089  | 5.83E-44  | 0.85 |
| 29609 | 31332  | 32661  | 1.82E-42  | 0.73 |
| 29609 | 43721  | 44918  | 5.27E-39  | 0.78 |
| 29609 | 50486  | 51847  | 4.48E-52  | 0.79 |
| 29609 | 60826  | 61114  | 1.36E-26  | 0.9  |
| 29609 | 84961  | 85386  | 1.78E-45  | 0.66 |
| 29609 | 90229  | 90547  | 8.09E-24  | 0.77 |
| 29609 | 93214  | 94367  | 5.85E-43  | 0.61 |
| 29609 | 100430 | 102320 | 3.93E-91  | 0.9  |
| 29609 | 104049 | 104340 | 2.48E-35  | 0.96 |
| 29609 | 105718 | 106008 | 1.87E-38  | 0.93 |
| 29609 | 108875 | 109862 | 2.03E-45  | 0.94 |
| 29609 | 131251 | 131897 | 7.69E-17  | 0.74 |
| 29609 | 136557 | 137766 | 4.34E-29  | 0.79 |
| 29609 | 138454 | 139493 | 4.12E-93  | 0.89 |
| 29609 | 144719 | 145435 | 5.92E-37  | 0.86 |
| 29609 | 145692 | 146080 | 2.32E-19  | 0.83 |
| 29609 | 147839 | 148647 | 3.24E-21  | 0.82 |
| 29609 | 148883 | 149733 | 4.55E-45  | 0.9  |
| 29609 | 150053 | 151229 | 3.14E-51  | 0.91 |
| 29609 | 174579 | 175509 | 1.24E-39  | 0.68 |
| 29609 | 188796 | 190105 | 9.57E-50  | 0.65 |
| 29609 | 193308 | 195278 | 2.76E-133 | 0.83 |
| 29609 | 195549 | 196230 | 1.29E-38  | 0.78 |
| 29609 | 196622 | 196840 | 1.43E-27  | 0.91 |
| 29609 | 197084 | 197392 | 6.06E-34  | 0.95 |
| 29609 | 198981 | 200491 | 1.24E-46  | 0.65 |

|       |        |        |           |      |
|-------|--------|--------|-----------|------|
| 29609 | 209503 | 209843 | 1.23E-17  | 0.9  |
| 29609 | 211952 | 212258 | 1.52E-08  | 0.6  |
| 29609 | 222305 | 223046 | 9.56E-39  | 0.88 |
| 29609 | 241007 | 241555 | 1.39E-31  | 0.82 |
| 29609 | 246175 | 246950 | 4.30E-72  | 0.6  |
| 29609 | 247180 | 248795 | 1.92E-130 | 0.79 |
| 29609 | 249348 | 250320 | 4.90E-87  | 0.76 |
| 29609 | 250913 | 251223 | 1.08E-23  | 0.69 |
| 29609 | 251447 | 252509 | 1.67E-169 | 0.86 |
| 29609 | 252719 | 253310 | 1.42E-55  | 0.88 |
| 29609 | 253698 | 254460 | 1.70E-210 | 0.92 |
| 29609 | 266215 | 266856 | 2.52E-39  | 0.78 |
| 29609 | 268510 | 268970 | 2.20E-21  | 0.91 |
| 29609 | 271909 | 272140 | 6.80E-29  | 0.99 |
| 29609 | 274815 | 275541 | 2.64E-22  | 0.81 |
| 29609 | 276197 | 276770 | 9.41E-48  | 0.89 |
| 29609 | 280852 | 281135 | 1.08E-16  | 0.8  |
| 29609 | 281735 | 282203 | 1.46E-29  | 0.8  |
| 29609 | 283630 | 284238 | 1.36E-27  | 0.78 |
| 29610 | 32547  | 33035  | 7.72E-12  | 0.7  |
| 29610 | 49153  | 49841  | 2.81E-51  | 0.84 |
| 29610 | 51208  | 51700  | 3.71E-23  | 0.92 |
| 29610 | 92234  | 94093  | 5.78E-108 | 0.79 |
| 29610 | 117197 | 118737 | 1.72E-57  | 0.78 |
| 29610 | 126429 | 127100 | 1.61E-39  | 0.79 |
| 29610 | 144140 | 144460 | 1.05E-22  | 0.78 |
| 29611 | 2261   | 2536   | 2.75E-16  | 0.95 |
| 29611 | 4345   | 4652   | 2.24E-23  | 0.86 |
| 29611 | 5819   | 6025   | 1.53E-05  | 0.94 |
| 29611 | 18548  | 20161  | 2.96E-118 | 0.77 |
| 29611 | 22783  | 23186  | 5.95E-25  | 0.93 |
| 29611 | 23478  | 23990  | 1.10E-15  | 0.86 |
| 29611 | 26903  | 27219  | 8.74E-29  | 0.91 |
| 29611 | 27457  | 27865  | 9.57E-25  | 0.85 |
| 29611 | 28337  | 28966  | 3.53E-21  | 0.72 |
| 29611 | 32501  | 32943  | 2.11E-22  | 0.79 |
| 29611 | 45939  | 47217  | 1.37E-48  | 0.84 |
| 29611 | 49989  | 51240  | 2.13E-64  | 0.64 |
| 29611 | 54131  | 54461  | 3.26E-12  | 0.82 |
| 29611 | 66453  | 67740  | 4.69E-43  | 0.74 |
| 29611 | 69073  | 69608  | 1.61E-54  | 0.84 |
| 29611 | 114470 | 114684 | 2.29E-28  | 0.88 |
| 29611 | 120190 | 120424 | 5.62E-11  | 0.78 |
| 29612 | 41380  | 42614  | 1.63E-55  | 0.93 |
| 29612 | 115714 | 115968 | 1.45E-12  | 0.92 |
| 29612 | 147766 | 148164 | 9.77E-116 | 0.96 |
| 29612 | 196803 | 197807 | 1.08E-98  | 0.95 |
| 29612 | 198451 | 200117 | 1.06E-113 | 0.93 |
| 29612 | 211852 | 212686 | 9.72E-51  | 0.89 |
| 29612 | 213028 | 213278 | 5.96E-20  | 0.88 |
| 29612 | 217152 | 217822 | 3.99E-27  | 0.8  |
| 29612 | 219900 | 221400 | 1.98E-56  | 0.86 |
| 29612 | 225518 | 226579 | 3.53E-64  | 0.89 |

|       |        |        |           |      |
|-------|--------|--------|-----------|------|
| 29612 | 231349 | 232911 | 8.12E-77  | 0.93 |
| 29612 | 234042 | 235315 | 2.65E-47  | 0.82 |
| 29612 | 241563 | 241915 | 1.51E-21  | 0.98 |
| 29612 | 270509 | 271919 | 4.24E-51  | 0.86 |
| 29612 | 274212 | 274913 | 8.99E-22  | 0.83 |
| 29612 | 291973 | 292527 | 3.90E-13  | 0.84 |
| 29612 | 328045 | 328343 | 2.03E-11  | 0.89 |
| 29613 | 43465  | 43939  | 3.07E-21  | 0.83 |
| 29613 | 80361  | 80829  | 3.03E-15  | 0.77 |
| 29613 | 112020 | 112234 | 6.67E-04  | 0.79 |
| 29613 | 138529 | 139013 | 8.64E-14  | 0.61 |
| 29613 | 140526 | 141315 | 4.37E-27  | 0.62 |
| 29614 | 4686   | 5387   | 6.04E-20  | 0.78 |
| 29615 | 6054   | 6310   | 3.37E-16  | 0.94 |
| 29615 | 12376  | 12800  | 3.30E-40  | 0.92 |
| 29615 | 57759  | 58168  | 3.13E-42  | 0.93 |
| 29615 | 60069  | 60331  | 1.81E-25  | 0.89 |
| 29615 | 63520  | 63769  | 3.70E-16  | 0.84 |
| 29615 | 175635 | 176256 | 5.99E-40  | 0.97 |
| 29615 | 176583 | 176871 | 5.74E-38  | 0.94 |
| 29615 | 177879 | 178426 | 3.74E-24  | 0.9  |
| 29615 | 192668 | 193176 | 1.20E-30  | 0.84 |
| 29615 | 228155 | 230823 | 2.13E-120 | 0.88 |
| 29615 | 237428 | 239070 | 3.53E-94  | 0.68 |
| 29615 | 251167 | 251394 | 6.66E-26  | 0.97 |
| 29615 | 251957 | 252371 | 2.71E-34  | 0.84 |
| 29615 | 321302 | 322199 | 1.97E-92  | 0.88 |
| 29615 | 334283 | 334635 | 3.66E-47  | 0.95 |
| 29615 | 373485 | 373750 | 4.36E-12  | 0.79 |
| 29615 | 375287 | 375960 | 6.95E-45  | 0.83 |
| 29615 | 377961 | 379018 | 2.99E-42  | 0.83 |
| 29615 | 381860 | 382173 | 6.63E-15  | 0.83 |
| 29615 | 382488 | 382861 | 3.11E-45  | 0.96 |
| 29615 | 383242 | 383947 | 2.86E-62  | 0.92 |
| 29615 | 384408 | 385046 | 4.62E-42  | 0.9  |
| 29615 | 387493 | 388373 | 8.83E-22  | 0.87 |
| 29615 | 391087 | 391447 | 4.97E-11  | 0.93 |
| 29615 | 391947 | 392404 | 2.99E-12  | 0.86 |
| 29615 | 393809 | 394201 | 4.20E-18  | 0.86 |
| 29615 | 396753 | 397086 | 4.92E-22  | 0.78 |
| 29615 | 456654 | 457281 | 8.02E-29  | 0.84 |
| 29615 | 487066 | 487711 | 3.50E-51  | 0.93 |
| 29615 | 531506 | 532025 | 2.28E-42  | 0.72 |
| 29615 | 532287 | 532792 | 1.25E-17  | 0.78 |
| 29615 | 533916 | 534850 | 1.97E-59  | 0.83 |
| 29615 | 542917 | 543138 | 1.21E-12  | 0.88 |
| 29615 | 545447 | 545896 | 9.64E-47  | 0.94 |
| 29615 | 546147 | 546798 | 1.23E-34  | 0.91 |
| 29615 | 596308 | 597468 | 7.45E-68  | 0.73 |
| 29616 | 21490  | 21909  | 1.37E-22  | 0.6  |
| 29616 | 27421  | 28097  | 8.24E-33  | 0.96 |
| 29616 | 40414  | 41089  | 4.61E-23  | 0.72 |
| 29616 | 41818  | 42080  | 1.82E-05  | 0.8  |

|       |        |        |           |      |
|-------|--------|--------|-----------|------|
| 29616 | 61520  | 61947  | 3.93E-40  | 0.89 |
| 29616 | 72315  | 72794  | 7.19E-53  | 0.96 |
| 29616 | 83122  | 83369  | 3.63E-11  | 0.83 |
| 29616 | 100520 | 101282 | 8.86E-22  | 0.8  |
| 29616 | 102784 | 104076 | 1.70E-81  | 0.66 |
| 29616 | 109644 | 110023 | 4.70E-08  | 0.78 |
| 29616 | 123966 | 124379 | 1.70E-21  | 0.81 |
| 29616 | 128021 | 128635 | 8.41E-25  | 0.63 |
| 29617 | 248    | 495    | 6.00E-11  | 0.65 |
| 29617 | 3241   | 3508   | 7.94E-30  | 0.94 |
| 29617 | 29064  | 29612  | 7.76E-22  | 0.95 |
| 29617 | 30094  | 31008  | 9.48E-49  | 0.88 |
| 29617 | 31730  | 34218  | 5.65E-112 | 0.87 |
| 29617 | 58414  | 58713  | 1.80E-58  | 0.96 |
| 29617 | 138264 | 138972 | 6.72E-20  | 0.81 |
| 29617 | 164755 | 164992 | 3.23E-08  | 0.82 |
| 29617 | 166779 | 167159 | 3.48E-99  | 0.92 |
| 29617 | 173604 | 173971 | 2.02E-40  | 0.89 |
| 29617 | 176576 | 177023 | 1.21E-17  | 0.94 |
| 29618 | 11422  | 11734  | 6.12E-21  | 0.76 |
| 29618 | 31459  | 31663  | 7.33E-10  | 0.84 |
| 29618 | 80593  | 80963  | 1.58E-20  | 0.67 |
| 29618 | 86378  | 87363  | 1.13E-160 | 0.98 |
| 29618 | 89316  | 89934  | 5.27E-20  | 0.79 |
| 29619 | 33341  | 33902  | 2.31E-35  | 0.86 |
| 29619 | 43135  | 43373  | 1.58E-25  | 0.9  |
| 29619 | 55481  | 55805  | 1.58E-31  | 0.96 |
| 29619 | 62244  | 62465  | 1.63E-43  | 0.92 |
| 29619 | 63163  | 63792  | 9.44E-55  | 0.93 |
| 29619 | 97827  | 98497  | 9.78E-11  | 0.86 |
| 29620 | 48831  | 49236  | 1.49E-22  | 0.97 |
| 29620 | 50588  | 51122  | 3.82E-32  | 0.95 |
| 29620 | 53435  | 54013  | 7.40E-52  | 0.94 |
| 29620 | 54238  | 54816  | 2.02E-66  | 0.91 |
| 29620 | 63921  | 64275  | 5.67E-12  | 0.87 |
| 29620 | 71899  | 72448  | 1.66E-31  | 0.93 |
| 29620 | 78433  | 78789  | 2.64E-22  | 0.92 |
| 29620 | 85168  | 85873  | 6.30E-31  | 0.82 |
| 29620 | 86155  | 86651  | 2.68E-46  | 0.9  |
| 29620 | 91657  | 92081  | 2.97E-20  | 0.79 |
| 29620 | 92563  | 92918  | 9.29E-42  | 0.96 |
| 29620 | 93790  | 94311  | 8.48E-17  | 0.92 |
| 29620 | 96034  | 96913  | 6.17E-82  | 0.93 |
| 29620 | 100741 | 101081 | 7.80E-41  | 0.97 |
| 29620 | 101470 | 101808 | 7.94E-28  | 0.9  |
| 29620 | 106730 | 107130 | 5.32E-23  | 0.94 |
| 29620 | 107479 | 107951 | 1.28E-32  | 0.87 |
| 29620 | 109945 | 110373 | 1.87E-12  | 0.75 |
| 29620 | 112905 | 113780 | 8.50E-66  | 0.95 |
| 29620 | 120588 | 121147 | 1.25E-45  | 0.94 |
| 29620 | 162711 | 163121 | 1.74E-14  | 0.81 |
| 29620 | 174065 | 174838 | 2.57E-25  | 0.9  |
| 29620 | 175435 | 176542 | 6.12E-76  | 0.95 |

|       |        |        |           |      |
|-------|--------|--------|-----------|------|
| 29620 | 186257 | 186591 | 7.60E-25  | 0.84 |
| 29620 | 188182 | 188717 | 1.44E-23  | 0.73 |
| 29620 | 197848 | 198310 | 1.49E-29  | 0.87 |
| 29620 | 201231 | 201840 | 2.89E-10  | 0.69 |
| 29620 | 223711 | 224131 | 9.22E-22  | 0.82 |
| 29620 | 232970 | 233608 | 1.69E-20  | 0.67 |
| 29620 | 235040 | 235585 | 9.54E-13  | 0.72 |
| 29620 | 245733 | 246779 | 2.38E-46  | 0.87 |
| 29621 | 9948   | 10797  | 7.12E-13  | 0.8  |
| 29621 | 91784  | 92032  | 1.92E-05  | 0.81 |
| 29622 | 111225 | 112542 | 2.62E-44  | 0.85 |
| 29622 | 142015 | 142415 | 6.56E-11  | 0.8  |
| 29623 | 2432   | 3122   | 6.20E-53  | 0.79 |
| 29623 | 13983  | 14674  | 6.40E-24  | 0.91 |
| 29623 | 54623  | 54915  | 1.68E-44  | 0.69 |
| 29623 | 55578  | 55935  | 3.28E-87  | 0.91 |
| 29623 | 58223  | 58905  | 1.94E-142 | 0.91 |
| 29623 | 85021  | 85538  | 1.50E-06  | 0.79 |
| 29623 | 110980 | 111393 | 6.98E-12  | 0.86 |
| 29623 | 124974 | 125932 | 2.46E-62  | 0.79 |
| 29623 | 127823 | 128206 | 1.67E-49  | 0.95 |
| 29623 | 137277 | 137976 | 1.09E-21  | 0.89 |
| 29623 | 176870 | 177283 | 6.74E-25  | 0.8  |
| 29623 | 181327 | 181795 | 1.65E-52  | 0.9  |
| 29623 | 182227 | 182741 | 1.87E-96  | 0.9  |
| 29623 | 183192 | 183577 | 5.05E-34  | 0.94 |
| 29623 | 184630 | 185570 | 4.33E-47  | 0.86 |
| 29623 | 187311 | 188449 | 9.90E-92  | 0.94 |
| 29623 | 194703 | 195029 | 9.71E-19  | 0.84 |
| 29623 | 195355 | 195957 | 1.04E-25  | 0.79 |
| 29623 | 261629 | 261965 | 6.55E-37  | 0.96 |
| 29623 | 281188 | 281623 | 7.93E-20  | 0.95 |
| 29623 | 281892 | 282258 | 3.42E-31  | 0.91 |
| 29623 | 302826 | 303698 | 1.95E-39  | 0.72 |
| 29623 | 303941 | 304301 | 2.72E-15  | 0.73 |
| 29623 | 305026 | 305337 | 4.50E-14  | 0.83 |
| 29623 | 318489 | 319855 | 6.90E-106 | 0.97 |
| 29623 | 320094 | 321092 | 5.27E-90  | 0.96 |
| 29623 | 321333 | 321823 | 6.57E-95  | 0.97 |
| 29623 | 322382 | 322893 | 2.32E-32  | 0.96 |
| 29624 | 121855 | 122414 | 1.13E-14  | 0.84 |
| 29624 | 212812 | 213167 | 6.76E-47  | 0.63 |
| 29624 | 215667 | 216771 | 4.56E-76  | 0.91 |
| 29624 | 217614 | 218091 | 1.45E-41  | 0.93 |
| 29624 | 219229 | 220694 | 1.69E-93  | 0.89 |
| 29624 | 261893 | 262850 | 8.96E-85  | 0.89 |
| 29624 | 264048 | 264397 | 2.34E-30  | 0.92 |
| 29624 | 265189 | 265535 | 2.35E-24  | 0.96 |
| 29624 | 265947 | 266379 | 1.90E-37  | 0.97 |
| 29624 | 266866 | 267180 | 2.54E-53  | 0.93 |
| 29624 | 269239 | 269675 | 1.50E-15  | 0.82 |
| 29624 | 273363 | 274946 | 4.09E-42  | 0.69 |
| 29624 | 278937 | 279217 | 1.90E-22  | 0.95 |



|       |        |        |           |      |
|-------|--------|--------|-----------|------|
| 29624 | 305358 | 306274 | 1.15E-85  | 0.96 |
| 29624 | 323437 | 323751 | 2.18E-12  | 0.81 |
| 29625 | 13534  | 14512  | 2.41E-47  | 0.67 |
| 29625 | 34258  | 34691  | 1.51E-12  | 0.81 |
| 29625 | 34951  | 35362  | 8.06E-15  | 0.74 |
| 29625 | 35602  | 35932  | 1.19E-25  | 0.7  |
| 29625 | 45560  | 45856  | 1.73E-17  | 0.77 |
| 29625 | 127314 | 128317 | 5.02E-62  | 0.86 |
| 29625 | 148509 | 149096 | 1.20E-43  | 0.93 |
| 29625 | 161867 | 162174 | 4.41E-26  | 0.9  |
| 29625 | 177089 | 177974 | 1.07E-10  | 0.63 |
| 29625 | 184875 | 185228 | 9.94E-39  | 0.97 |
| 29625 | 193180 | 193906 | 3.86E-46  | 0.6  |
| 29625 | 197989 | 198437 | 5.54E-30  | 0.75 |
| 29625 | 198659 | 199820 | 2.04E-44  | 0.72 |
| 29625 | 202343 | 203235 | 1.30E-46  | 0.82 |
| 29625 | 203547 | 204433 | 6.94E-67  | 0.91 |
| 29625 | 211107 | 212557 | 6.67E-59  | 0.85 |
| 29625 | 224958 | 227890 | 2.22E-156 | 0.61 |
| 29625 | 234053 | 234454 | 1.52E-13  | 0.82 |
| 29625 | 239626 | 240200 | 5.86E-34  | 0.86 |
| 29625 | 240780 | 241813 | 2.09E-71  | 0.85 |
| 29625 | 251469 | 251831 | 1.15E-24  | 0.84 |
| 29625 | 255795 | 256107 | 5.33E-08  | 0.72 |
| 29626 | 3256   | 3817   | 1.07E-37  | 0.93 |
| 29626 | 17353  | 17590  | 2.44E-23  | 0.73 |
| 29626 | 25297  | 25718  | 2.84E-24  | 0.83 |
| 29626 | 32375  | 33817  | 6.30E-46  | 0.71 |
| 29626 | 51312  | 51755  | 8.09E-24  | 0.67 |
| 29626 | 57876  | 60096  | 4.48E-125 | 0.94 |
| 29626 | 83205  | 83580  | 4.01E-19  | 0.94 |
| 29627 | 75290  | 75609  | 2.43E-30  | 0.95 |
| 29627 | 75929  | 76158  | 6.58E-22  | 0.88 |
| 29627 | 76779  | 77062  | 1.22E-37  | 0.93 |
| 29627 | 119162 | 119903 | 5.21E-34  | 0.9  |
| 29628 | 10106  | 10800  | 1.54E-41  | 0.93 |
| 29628 | 11084  | 11348  | 1.06E-21  | 0.86 |
| 29628 | 16786  | 17546  | 8.09E-33  | 0.83 |
| 29628 | 18689  | 19541  | 5.26E-24  | 0.8  |
| 29628 | 19767  | 20018  | 3.64E-12  | 0.8  |
| 29628 | 23875  | 24184  | 3.56E-22  | 0.9  |
| 29628 | 24726  | 25023  | 2.08E-41  | 0.89 |
| 29628 | 44232  | 44898  | 1.60E-35  | 0.81 |
| 29628 | 61909  | 63012  | 1.52E-48  | 0.81 |
| 29628 | 73068  | 73557  | 4.83E-18  | 0.78 |
| 29628 | 96757  | 97237  | 7.89E-23  | 0.81 |
| 29628 | 104751 | 105790 | 2.86E-56  | 0.81 |
| 29628 | 106105 | 106333 | 3.38E-12  | 0.69 |
| 29628 | 113104 | 113677 | 6.55E-53  | 0.79 |
| 29628 | 115909 | 116626 | 7.08E-47  | 0.77 |
| 29628 | 119281 | 121240 | 4.31E-92  | 0.81 |
| 29628 | 136780 | 137190 | 3.73E-110 | 0.93 |
| 29628 | 137613 | 138119 | 4.18E-37  | 0.84 |

|       |        |        |           |      |
|-------|--------|--------|-----------|------|
| 29628 | 139874 | 140959 | 1.09E-168 | 0.91 |
| 29628 | 141384 | 141848 | 5.81E-44  | 0.86 |
| 29628 | 143378 | 143871 | 3.99E-24  | 0.84 |
| 29628 | 160742 | 161128 | 8.41E-25  | 0.79 |
| 29628 | 161889 | 162138 | 1.03E-60  | 0.89 |
| 29628 | 164759 | 165810 | 3.43E-60  | 0.8  |
| 29628 | 167949 | 168385 | 1.24E-16  | 0.79 |
| 29628 | 169327 | 170411 | 5.63E-50  | 0.84 |
| 29628 | 188336 | 188736 | 1.07E-37  | 0.94 |
| 29628 | 204704 | 205124 | 2.39E-22  | 0.66 |
| 29628 | 209488 | 210095 | 1.29E-26  | 0.83 |
| 29628 | 210456 | 210933 | 1.12E-48  | 0.89 |
| 29628 | 214847 | 215603 | 1.48E-72  | 0.91 |
| 29628 | 218314 | 218699 | 7.63E-25  | 0.95 |
| 29629 | 13     | 411    | 6.93E-05  | 0.76 |
| 29629 | 44477  | 45197  | 4.85E-47  | 0.76 |
| 29629 | 46449  | 47549  | 4.13E-92  | 0.82 |
| 29629 | 88122  | 88598  | 3.49E-46  | 0.93 |
| 29629 | 90706  | 90932  | 1.10E-18  | 0.81 |
| 29629 | 93264  | 94656  | 2.90E-60  | 0.75 |
| 29629 | 116381 | 117290 | 5.69E-13  | 0.74 |
| 29629 | 119486 | 120833 | 1.14E-94  | 0.8  |
| 29629 | 139774 | 140076 | 9.64E-13  | 0.61 |
| 29629 | 151221 | 151899 | 7.41E-13  | 0.62 |
| 29629 | 157644 | 159072 | 6.77E-97  | 0.77 |
| 29629 | 162110 | 162435 | 1.22E-15  | 0.79 |
| 29629 | 183368 | 183588 | 4.70E-12  | 0.62 |
| 29629 | 194783 | 195225 | 2.49E-20  | 0.88 |
| 29629 | 197507 | 197916 | 2.79E-22  | 0.77 |
| 29629 | 198360 | 198686 | 9.59E-17  | 0.77 |
| 29629 | 210036 | 210357 | 1.71E-17  | 0.91 |
| 29629 | 215057 | 215420 | 1.15E-10  | 0.71 |
| 29629 | 215667 | 215904 | 2.18E-42  | 0.95 |
| 29629 | 257132 | 257334 | 2.94E-15  | 0.79 |
| 29629 | 285408 | 285775 | 1.66E-25  | 0.84 |
| 29629 | 287811 | 289124 | 9.36E-32  | 0.81 |
| 29629 | 302356 | 302952 | 1.30E-39  | 0.83 |
| 29629 | 309197 | 309600 | 4.57E-31  | 0.93 |
| 29629 | 314660 | 314961 | 2.07E-14  | 0.81 |
| 29629 | 319347 | 319732 | 6.52E-19  | 0.78 |
| 29629 | 334674 | 335302 | 1.67E-67  | 0.88 |
| 29629 | 340678 | 341381 | 1.82E-32  | 0.63 |
| 29629 | 365823 | 366249 | 3.04E-23  | 0.74 |
| 29629 | 382098 | 382900 | 1.76E-54  | 0.97 |
| 29629 | 384086 | 384637 | 5.76E-23  | 0.78 |
| 29629 | 388091 | 388380 | 9.52E-10  | 0.69 |
| 29629 | 420243 | 420631 | 5.79E-20  | 0.88 |
| 29629 | 423768 | 424923 | 6.07E-39  | 0.84 |
| 29629 | 457446 | 457793 | 3.91E-17  | 0.78 |
| 29629 | 460028 | 460404 | 9.65E-36  | 0.85 |
| 29629 | 460760 | 461417 | 1.76E-21  | 0.73 |
| 29629 | 464277 | 464838 | 1.04E-40  | 0.92 |
| 29629 | 465217 | 465915 | 6.63E-38  | 0.82 |

|       |        |        |           |      |
|-------|--------|--------|-----------|------|
| 29629 | 473349 | 473962 | 1.52E-39  | 0.88 |
| 29629 | 474202 | 474699 | 1.45E-32  | 0.87 |
| 29629 | 476518 | 477409 | 6.12E-26  | 0.8  |
| 29629 | 482383 | 483347 | 7.95E-40  | 0.77 |
| 29629 | 493956 | 494495 | 9.51E-28  | 0.7  |
| 29629 | 496954 | 498141 | 3.34E-66  | 0.86 |
| 29629 | 500659 | 501092 | 1.99E-07  | 0.74 |
| 29629 | 517485 | 517970 | 1.84E-07  | 0.8  |
| 29629 | 532468 | 532957 | 7.57E-28  | 0.76 |
| 29629 | 557290 | 557776 | 5.66E-27  | 0.83 |
| 29629 | 560523 | 561905 | 9.79E-42  | 0.81 |
| 29629 | 564684 | 564998 | 3.53E-35  | 0.89 |
| 29629 | 573838 | 574595 | 3.02E-32  | 0.73 |
| 29629 | 575249 | 575491 | 1.23E-23  | 0.83 |
| 29629 | 578642 | 579126 | 1.66E-18  | 0.78 |
| 29629 | 579444 | 579946 | 1.48E-18  | 0.86 |
| 29629 | 580167 | 580522 | 1.72E-31  | 0.89 |
| 29629 | 601301 | 601858 | 4.45E-13  | 0.75 |
| 29629 | 604112 | 604316 | 2.56E-26  | 0.83 |
| 29630 | 3739   | 4039   | 2.09E-07  | 0.68 |
| 29630 | 21449  | 22035  | 2.48E-30  | 0.61 |
| 29630 | 23516  | 23904  | 5.97E-19  | 0.77 |
| 29630 | 24886  | 25564  | 6.27E-16  | 0.88 |
| 29630 | 37065  | 37299  | 1.25E-11  | 0.82 |
| 29630 | 45030  | 45726  | 1.08E-23  | 0.75 |
| 29630 | 45957  | 46341  | 2.72E-39  | 0.8  |
| 29630 | 48554  | 50459  | 3.05E-78  | 0.8  |
| 29630 | 58740  | 62253  | 2.59E-246 | 0.87 |
| 29630 | 67018  | 67330  | 8.65E-17  | 0.72 |
| 29630 | 67626  | 68047  | 2.27E-34  | 0.81 |
| 29630 | 77813  | 78099  | 1.44E-27  | 0.96 |
| 29630 | 84092  | 84292  | 2.56E-10  | 0.8  |
| 29630 | 107140 | 107471 | 1.54E-17  | 0.82 |
| 29630 | 124521 | 125171 | 6.60E-49  | 0.81 |
| 29630 | 140658 | 140880 | 5.77E-21  | 0.65 |
| 29630 | 141757 | 142222 | 1.12E-12  | 0.93 |
| 29630 | 162346 | 162768 | 2.10E-26  | 0.9  |
| 29630 | 170213 | 170575 | 6.68E-20  | 0.74 |
| 29630 | 184351 | 185111 | 3.27E-13  | 0.71 |
| 29630 | 187109 | 187476 | 2.85E-38  | 0.92 |
| 29630 | 192519 | 192898 | 1.21E-27  | 0.96 |
| 29630 | 196502 | 197158 | 5.20E-61  | 0.94 |
| 29630 | 198028 | 198461 | 1.07E-40  | 0.92 |
| 29630 | 203618 | 204034 | 2.31E-89  | 0.8  |
| 29630 | 208203 | 208482 | 6.44E-16  | 0.78 |
| 29630 | 216104 | 216771 | 1.01E-33  | 0.86 |
| 29630 | 219825 | 220488 | 2.65E-50  | 0.76 |
| 29630 | 224745 | 225347 | 7.95E-27  | 0.84 |
| 29630 | 227731 | 228020 | 1.65E-26  | 0.82 |
| 29630 | 228498 | 228972 | 1.44E-42  | 0.9  |
| 29630 | 232299 | 233796 | 6.50E-56  | 0.84 |
| 29630 | 262238 | 262994 | 3.85E-17  | 0.71 |
| 29630 | 296082 | 296469 | 1.55E-12  | 0.66 |

|       |        |        |           |      |
|-------|--------|--------|-----------|------|
| 29630 | 296920 | 297344 | 4.14E-20  | 0.66 |
| 29630 | 320008 | 320466 | 7.02E-28  | 0.64 |
| 29630 | 363009 | 363486 | 2.85E-29  | 0.85 |
| 29630 | 367644 | 368274 | 1.16E-31  | 0.79 |
| 29631 | 27611  | 28252  | 3.90E-19  | 0.84 |
| 29631 | 61149  | 62170  | 1.43E-93  | 0.88 |
| 29631 | 62982  | 63537  | 9.60E-76  | 0.84 |
| 29631 | 76863  | 77335  | 1.14E-51  | 0.76 |
| 29631 | 77536  | 78228  | 2.33E-15  | 0.78 |
| 29631 | 78837  | 79348  | 3.59E-16  | 0.75 |
| 29631 | 110294 | 111187 | 2.61E-49  | 0.69 |
| 29631 | 115976 | 116183 | 4.03E-24  | 0.81 |
| 29631 | 142420 | 143530 | 5.32E-52  | 0.81 |
| 29631 | 144778 | 145884 | 3.70E-60  | 0.75 |
| 29631 | 163729 | 164020 | 9.94E-12  | 0.72 |
| 29631 | 170528 | 170781 | 8.41E-20  | 0.79 |
| 29631 | 194124 | 195511 | 9.95E-59  | 0.75 |
| 29631 | 204295 | 204817 | 5.78E-13  | 0.66 |
| 29631 | 252793 | 253227 | 2.00E-22  | 0.6  |
| 29631 | 268992 | 269738 | 7.25E-42  | 0.71 |
| 29631 | 308537 | 309821 | 2.62E-35  | 0.73 |
| 29631 | 313885 | 314236 | 7.09E-41  | 0.85 |
| 29631 | 318597 | 319061 | 2.29E-18  | 0.81 |
| 29631 | 320251 | 320703 | 1.25E-29  | 0.91 |
| 29631 | 332986 | 333279 | 1.10E-28  | 0.74 |
| 29631 | 334948 | 335464 | 1.10E-60  | 0.88 |
| 29631 | 335758 | 336708 | 4.88E-57  | 0.7  |
| 29631 | 346887 | 347750 | 2.25E-50  | 0.93 |
| 29631 | 368985 | 369242 | 4.07E-21  | 0.86 |
| 29631 | 380922 | 381817 | 1.62E-24  | 0.78 |
| 29631 | 382311 | 383043 | 1.40E-38  | 0.87 |
| 29631 | 393178 | 394122 | 1.51E-17  | 0.64 |
| 29632 | 112975 | 113410 | 7.78E-78  | 0.92 |
| 29632 | 116626 | 117007 | 2.73E-20  | 0.94 |
| 29633 | 8661   | 10341  | 1.22E-65  | 0.82 |
| 29633 | 17456  | 17865  | 1.65E-27  | 0.9  |
| 29633 | 32581  | 33074  | 2.51E-17  | 0.79 |
| 29633 | 35869  | 36469  | 4.50E-21  | 0.77 |
| 29633 | 36849  | 37191  | 5.70E-27  | 0.91 |
| 29633 | 39313  | 40307  | 2.62E-63  | 0.83 |
| 29633 | 41079  | 41332  | 1.99E-47  | 0.91 |
| 29633 | 41991  | 42713  | 1.22E-47  | 0.93 |
| 29633 | 43615  | 44000  | 1.12E-24  | 0.93 |
| 29633 | 90521  | 91001  | 5.74E-21  | 0.8  |
| 29633 | 94301  | 94745  | 1.21E-22  | 0.82 |
| 29633 | 95617  | 96426  | 2.14E-31  | 0.73 |
| 29633 | 110569 | 111284 | 1.62E-30  | 0.61 |
| 29633 | 120408 | 121018 | 2.52E-24  | 0.81 |
| 29633 | 124453 | 124914 | 1.80E-34  | 0.88 |
| 29633 | 160314 | 161639 | 3.67E-88  | 0.88 |
| 29633 | 164708 | 164914 | 4.97E-14  | 0.64 |
| 29633 | 198485 | 199599 | 2.08E-166 | 0.94 |
| 29633 | 208566 | 208789 | 1.42E-26  | 0.94 |

|       |        |        |           |      |
|-------|--------|--------|-----------|------|
| 29633 | 209623 | 210408 | 3.16E-64  | 0.82 |
| 29633 | 217172 | 217612 | 4.48E-21  | 0.79 |
| 29633 | 291060 | 291781 | 1.75E-19  | 0.91 |
| 29633 | 293845 | 294692 | 2.27E-19  | 0.6  |
| 29633 | 296660 | 297090 | 8.03E-24  | 0.75 |
| 29633 | 318476 | 319164 | 4.21E-37  | 0.79 |
| 29633 | 320173 | 320483 | 2.22E-19  | 0.85 |
| 29633 | 321660 | 321943 | 1.50E-67  | 0.94 |
| 29633 | 322714 | 323319 | 3.11E-17  | 0.79 |
| 29633 | 323551 | 323979 | 1.44E-18  | 0.91 |
| 29633 | 333835 | 334887 | 1.14E-27  | 0.78 |
| 29633 | 335099 | 336591 | 7.54E-84  | 0.77 |
| 29634 | 1284   | 2277   | 1.32E-55  | 0.67 |
| 29634 | 4323   | 4592   | 1.04E-22  | 0.64 |
| 29634 | 25416  | 25957  | 9.42E-16  | 0.7  |
| 29634 | 49774  | 50421  | 4.74E-71  | 0.86 |
| 29634 | 50740  | 51638  | 3.09E-12  | 0.88 |
| 29634 | 51933  | 52996  | 2.38E-125 | 0.85 |
| 29634 | 66110  | 66345  | 2.81E-24  | 0.83 |
| 29634 | 66694  | 67053  | 1.44E-34  | 0.85 |
| 29634 | 67302  | 68154  | 6.45E-70  | 0.75 |
| 29634 | 75237  | 75742  | 8.24E-46  | 0.82 |
| 29634 | 85730  | 86423  | 4.17E-25  | 0.78 |
| 29634 | 87083  | 87459  | 1.69E-23  | 0.81 |
| 29634 | 111075 | 112032 | 9.74E-77  | 0.8  |
| 29634 | 113839 | 114223 | 2.14E-36  | 0.86 |
| 29634 | 136567 | 136909 | 4.81E-18  | 0.79 |
| 29634 | 150654 | 150951 | 5.18E-12  | 0.78 |
| 29634 | 157511 | 157773 | 1.05E-55  | 0.92 |
| 29634 | 161441 | 161747 | 1.28E-31  | 0.72 |
| 29634 | 166713 | 167772 | 5.77E-49  | 0.89 |
| 29634 | 180630 | 182255 | 1.12E-62  | 0.8  |
| 29634 | 182546 | 182978 | 5.44E-21  | 0.81 |
| 29634 | 188313 | 188863 | 1.85E-33  | 0.82 |
| 29634 | 193438 | 193827 | 2.49E-12  | 0.81 |
| 29634 | 194927 | 195751 | 1.97E-86  | 0.91 |
| 29634 | 196097 | 196516 | 2.33E-31  | 0.85 |
| 29634 | 219558 | 219958 | 3.33E-10  | 0.83 |
| 29634 | 241602 | 241938 | 4.63E-27  | 0.75 |
| 29634 | 265160 | 265384 | 1.37E-09  | 0.63 |
| 29634 | 269623 | 269986 | 1.98E-25  | 0.81 |
| 29634 | 270644 | 271432 | 2.05E-50  | 0.9  |
| 29634 | 303904 | 304394 | 2.27E-07  | 0.77 |
| 29634 | 324966 | 325683 | 5.88E-57  | 0.93 |
| 29634 | 345232 | 345901 | 6.02E-40  | 0.76 |
| 29634 | 346220 | 346507 | 7.96E-30  | 0.73 |
| 29634 | 356366 | 356902 | 6.16E-20  | 0.81 |
| 29634 | 357398 | 357623 | 3.41E-20  | 0.83 |
| 29634 | 358352 | 358953 | 1.10E-19  | 0.75 |
| 29634 | 360305 | 361374 | 4.31E-37  | 0.62 |
| 29634 | 368487 | 369039 | 1.66E-57  | 0.64 |
| 29634 | 374927 | 375642 | 4.53E-09  | 0.66 |
| 29634 | 395248 | 395919 | 1.64E-32  | 0.65 |

|       |        |        |           |      |
|-------|--------|--------|-----------|------|
| 29634 | 396130 | 396559 | 1.07E-45  | 0.85 |
| 29634 | 403827 | 404880 | 1.26E-64  | 0.91 |
| 29634 | 411373 | 411613 | 9.60E-25  | 0.87 |
| 29634 | 422323 | 422709 | 1.66E-31  | 0.9  |
| 29634 | 434908 | 435283 | 9.68E-41  | 0.95 |
| 29634 | 435596 | 435911 | 5.27E-17  | 0.87 |
| 29634 | 437986 | 438667 | 1.03E-34  | 0.71 |
| 29634 | 439452 | 439916 | 1.10E-20  | 0.69 |
| 29634 | 440964 | 441479 | 1.78E-35  | 0.7  |
| 29634 | 441944 | 442401 | 1.50E-68  | 0.78 |
| 29634 | 449351 | 449954 | 4.38E-54  | 0.89 |
| 29634 | 451620 | 451872 | 1.13E-32  | 0.92 |
| 29634 | 495306 | 495667 | 3.50E-15  | 0.81 |
| 29634 | 503568 | 504730 | 6.84E-38  | 0.75 |
| 29634 | 544418 | 544699 | 3.11E-16  | 0.81 |
| 29634 | 549383 | 549921 | 9.21E-42  | 0.85 |
| 29634 | 561912 | 562437 | 3.49E-83  | 0.94 |
| 29634 | 579454 | 579698 | 1.23E-20  | 0.77 |
| 29634 | 579950 | 580532 | 2.58E-28  | 0.84 |
| 29634 | 581457 | 581960 | 6.35E-30  | 0.87 |
| 29634 | 582592 | 583634 | 1.13E-46  | 0.87 |
| 29634 | 588543 | 588800 | 7.89E-35  | 0.71 |
| 29634 | 594498 | 594829 | 1.25E-14  | 0.89 |
| 29634 | 635712 | 636604 | 3.65E-73  | 0.89 |
| 29634 | 638840 | 640295 | 2.77E-39  | 0.82 |
| 29634 | 646925 | 648692 | 2.88E-103 | 0.8  |
| 29634 | 650355 | 651254 | 1.24E-23  | 0.77 |
| 29635 | 11371  | 11741  | 1.42E-15  | 0.8  |
| 29635 | 19340  | 19668  | 1.24E-07  | 0.72 |
| 29635 | 51418  | 52021  | 5.60E-17  | 0.76 |
| 29635 | 62069  | 62406  | 7.49E-27  | 0.69 |
| 29635 | 65955  | 66537  | 1.46E-26  | 0.84 |
| 29635 | 79882  | 80625  | 5.47E-48  | 0.85 |
| 29635 | 99156  | 100058 | 8.74E-32  | 0.84 |
| 29635 | 100303 | 100949 | 7.83E-13  | 0.83 |
| 29635 | 108478 | 109158 | 1.35E-35  | 0.67 |
| 29635 | 109748 | 110364 | 4.61E-45  | 0.86 |
| 29635 | 111074 | 111433 | 4.05E-14  | 0.78 |
| 29635 | 111776 | 113953 | 2.26E-113 | 0.91 |
| 29635 | 119191 | 119431 | 4.40E-10  | 0.81 |
| 29635 | 120225 | 120673 | 8.65E-15  | 0.74 |
| 29635 | 134240 | 134483 | 6.38E-24  | 0.9  |
| 29635 | 134690 | 134933 | 5.43E-37  | 0.95 |
| 29635 | 135312 | 135935 | 3.01E-97  | 0.94 |
| 29635 | 138724 | 139682 | 4.97E-37  | 0.83 |
| 29635 | 141087 | 141601 | 7.09E-17  | 0.82 |
| 29635 | 192501 | 193267 | 8.18E-16  | 0.73 |
| 29635 | 200596 | 201169 | 1.61E-23  | 0.78 |
| 29636 | 1885   | 3041   | 6.02E-30  | 0.75 |
| 29636 | 15198  | 15742  | 1.72E-55  | 0.94 |
| 29636 | 20097  | 20980  | 3.35E-35  | 0.75 |
| 29636 | 21300  | 21747  | 1.32E-13  | 0.64 |
| 29636 | 22900  | 23557  | 3.27E-25  | 0.72 |

|       |        |        |          |      |
|-------|--------|--------|----------|------|
| 29636 | 27845  | 28471  | 1.05E-34 | 0.65 |
| 29636 | 32410  | 32852  | 3.36E-63 | 0.94 |
| 29636 | 33171  | 33478  | 1.40E-35 | 0.92 |
| 29636 | 61598  | 62176  | 3.00E-20 | 0.88 |
| 29636 | 102012 | 102653 | 1.84E-34 | 0.86 |
| 29636 | 103840 | 105248 | 1.25E-42 | 0.87 |
| 29636 | 109298 | 109821 | 1.05E-34 | 0.83 |
| 29636 | 113769 | 114877 | 1.92E-52 | 0.68 |
| 29636 | 157492 | 157786 | 3.53E-41 | 0.92 |
| 29636 | 158659 | 159934 | 1.32E-59 | 0.85 |
| 29636 | 160342 | 160743 | 3.56E-39 | 0.86 |
| 29636 | 160984 | 161253 | 1.84E-41 | 0.89 |
| 29636 | 161514 | 162993 | 9.06E-74 | 0.95 |
| 29636 | 165039 | 165571 | 2.97E-24 | 0.91 |
| 29636 | 228322 | 228526 | 2.43E-07 | 0.8  |
| 29636 | 232313 | 232704 | 1.36E-17 | 0.85 |
| 29636 | 236644 | 237407 | 4.57E-43 | 0.86 |
| 29636 | 237900 | 238100 | 2.35E-25 | 0.92 |
| 29636 | 239812 | 240240 | 2.22E-16 | 0.78 |
| 29636 | 240976 | 241351 | 1.19E-16 | 0.85 |
| 29636 | 288238 | 288675 | 2.81E-16 | 0.64 |
| 29636 | 303645 | 303900 | 3.66E-17 | 0.83 |
| 29636 | 304212 | 304424 | 5.91E-13 | 0.71 |
| 29636 | 326631 | 327376 | 4.97E-67 | 0.93 |
| 29636 | 330563 | 330940 | 4.36E-38 | 0.94 |
| 29636 | 331209 | 332083 | 2.83E-81 | 0.88 |
| 29636 | 332652 | 333417 | 1.52E-36 | 0.87 |
| 29636 | 336751 | 337084 | 9.82E-18 | 0.92 |
| 29636 | 386728 | 387054 | 1.93E-20 | 0.82 |
| 29637 | 8962   | 11225  | 1.43E-82 | 0.85 |
| 29637 | 16671  | 17069  | 2.84E-25 | 0.9  |
| 29637 | 29299  | 29927  | 2.12E-35 | 0.75 |
| 29637 | 39718  | 40149  | 5.73E-26 | 0.83 |
| 29637 | 46926  | 47470  | 4.08E-15 | 0.61 |
| 29637 | 52576  | 52971  | 9.05E-32 | 0.66 |
| 29637 | 53331  | 53856  | 1.10E-25 | 0.64 |
| 29637 | 56410  | 56992  | 4.88E-29 | 0.87 |
| 29637 | 61255  | 61499  | 7.71E-43 | 0.84 |
| 29637 | 82902  | 83579  | 8.80E-44 | 0.79 |
| 29637 | 89127  | 89543  | 5.89E-23 | 0.78 |
| 29637 | 136887 | 138237 | 5.32E-54 | 0.86 |
| 29637 | 138726 | 140282 | 2.37E-62 | 0.87 |
| 29637 | 140731 | 141232 | 4.26E-34 | 0.82 |
| 29637 | 142814 | 143709 | 1.35E-37 | 0.87 |
| 29637 | 144720 | 144955 | 2.09E-04 | 0.37 |
| 29637 | 164095 | 164961 | 8.65E-41 | 0.75 |
| 29637 | 175813 | 176493 | 2.56E-41 | 0.64 |
| 29637 | 198958 | 199499 | 2.85E-44 | 0.84 |
| 29637 | 200985 | 202088 | 5.55E-60 | 0.87 |
| 29637 | 209666 | 209968 | 9.97E-11 | 0.72 |
| 29637 | 219448 | 219918 | 2.38E-14 | 0.8  |
| 29637 | 305450 | 305927 | 5.69E-25 | 0.76 |
| 29637 | 306449 | 306925 | 2.06E-22 | 0.81 |

|       |        |        |           |      |
|-------|--------|--------|-----------|------|
| 29637 | 336113 | 336493 | 1.80E-22  | 0.69 |
| 29637 | 341733 | 343252 | 8.96E-105 | 0.89 |
| 29637 | 344483 | 344862 | 1.98E-44  | 0.94 |
| 29637 | 345084 | 345536 | 5.33E-61  | 0.77 |
| 29638 | 16479  | 17752  | 1.65E-40  | 0.79 |
| 29638 | 18344  | 19232  | 4.96E-39  | 0.84 |
| 29638 | 20875  | 21264  | 6.06E-12  | 0.81 |
| 29638 | 22650  | 23111  | 5.63E-11  | 0.73 |
| 29638 | 25473  | 26824  | 9.25E-57  | 0.81 |
| 29638 | 28810  | 29064  | 5.18E-32  | 0.95 |
| 29638 | 30424  | 30982  | 1.52E-48  | 0.89 |
| 29638 | 31678  | 32139  | 1.23E-26  | 0.86 |
| 29638 | 38962  | 39380  | 1.03E-52  | 0.82 |
| 29638 | 86208  | 86521  | 1.38E-13  | 0.81 |
| 29638 | 95260  | 95965  | 3.46E-20  | 0.72 |
| 29638 | 158727 | 159565 | 1.90E-90  | 0.92 |
| 29638 | 159862 | 160093 | 3.82E-17  | 0.75 |
| 29638 | 176438 | 176725 | 3.74E-41  | 0.89 |
| 29638 | 193462 | 193853 | 7.72E-24  | 0.83 |
| 29638 | 194529 | 194731 | 2.70E-13  | 0.79 |
| 29638 | 196364 | 196665 | 2.69E-17  | 0.82 |
| 29638 | 217672 | 218838 | 7.71E-43  | 0.8  |
| 29638 | 219262 | 219657 | 1.65E-48  | 0.87 |
| 29638 | 220972 | 221774 | 1.23E-38  | 0.9  |
| 29638 | 223255 | 224215 | 5.70E-53  | 0.89 |
| 29639 | 4783   | 5747   | 2.70E-98  | 0.93 |
| 29639 | 6096   | 6651   | 9.58E-68  | 0.93 |
| 29639 | 19753  | 20083  | 4.24E-19  | 0.9  |
| 29639 | 42937  | 43178  | 3.85E-10  | 0.84 |
| 29639 | 53849  | 54186  | 9.29E-34  | 0.93 |
| 29639 | 67393  | 67876  | 1.77E-28  | 0.96 |
| 29639 | 75614  | 76621  | 1.42E-54  | 0.94 |
| 29640 | 20808  | 21997  | 1.12E-130 | 0.89 |
| 29640 | 22807  | 23062  | 4.62E-21  | 0.82 |
| 29640 | 23314  | 24951  | 1.26E-277 | 0.91 |
| 29640 | 36995  | 37287  | 2.23E-18  | 0.91 |
| 29640 | 54011  | 54247  | 1.10E-11  | 0.79 |
| 29640 | 55889  | 56220  | 8.52E-24  | 0.94 |
| 29640 | 70972  | 71314  | 1.29E-20  | 0.7  |
| 29640 | 72765  | 73471  | 4.04E-62  | 0.85 |
| 29640 | 85539  | 86021  | 6.62E-31  | 0.88 |
| 29640 | 88047  | 88457  | 3.66E-28  | 0.97 |
| 29640 | 94775  | 96526  | 2.33E-134 | 0.76 |
| 29640 | 99439  | 100158 | 2.27E-40  | 0.88 |
| 29640 | 114797 | 115148 | 6.60E-16  | 0.82 |
| 29640 | 120562 | 121295 | 1.87E-29  | 0.81 |
| 29640 | 151921 | 152457 | 5.53E-28  | 0.85 |
| 29641 | 6549   | 7233   | 2.31E-26  | 0.74 |
| 29641 | 7441   | 7844   | 1.86E-29  | 0.88 |
| 29641 | 15326  | 16172  | 2.94E-35  | 0.82 |
| 29641 | 29940  | 30879  | 1.50E-56  | 0.94 |
| 29641 | 33320  | 33600  | 2.55E-20  | 0.86 |
| 29641 | 34317  | 34832  | 2.10E-13  | 0.85 |



|       |        |        |           |      |
|-------|--------|--------|-----------|------|
| 29641 | 49289  | 49575  | 1.05E-22  | 0.87 |
| 29641 | 50105  | 50533  | 8.12E-15  | 0.78 |
| 29641 | 54707  | 54910  | 1.86E-11  | 0.94 |
| 29641 | 55155  | 55408  | 1.05E-37  | 0.9  |
| 29641 | 56216  | 56565  | 6.76E-45  | 0.96 |
| 29641 | 57997  | 58288  | 7.96E-11  | 0.8  |
| 29641 | 60585  | 60983  | 1.48E-19  | 0.96 |
| 29641 | 68036  | 68508  | 2.33E-27  | 0.84 |
| 29641 | 70085  | 70451  | 3.09E-16  | 0.8  |
| 29641 | 74867  | 75874  | 2.47E-22  | 0.73 |
| 29641 | 93624  | 93991  | 2.42E-22  | 0.85 |
| 29641 | 95319  | 95668  | 4.35E-35  | 0.78 |
| 29641 | 96092  | 96463  | 1.92E-53  | 0.81 |
| 29641 | 96848  | 97380  | 8.88E-103 | 0.86 |
| 29641 | 112079 | 113294 | 3.15E-95  | 0.66 |
| 29641 | 123386 | 124801 | 4.13E-66  | 0.7  |
| 29641 | 143794 | 144127 | 7.14E-11  | 0.7  |
| 29641 | 155422 | 156195 | 1.60E-39  | 0.94 |
| 29642 | 21628  | 22165  | 4.81E-14  | 0.79 |
| 29642 | 22549  | 22986  | 3.22E-20  | 0.84 |
| 29642 | 35959  | 36421  | 9.57E-09  | 0.81 |
| 29642 | 43387  | 43634  | 1.90E-29  | 0.96 |
| 29642 | 79016  | 79260  | 1.32E-10  | 0.78 |
| 29642 | 82295  | 83246  | 3.80E-30  | 0.66 |
| 29642 | 84049  | 84319  | 2.26E-41  | 0.91 |
| 29642 | 84550  | 85330  | 1.13E-29  | 0.82 |
| 29642 | 106693 | 107590 | 2.76E-75  | 0.83 |
| 29642 | 111751 | 112752 | 3.05E-52  | 0.94 |
| 29642 | 117083 | 117450 | 4.32E-17  | 0.82 |
| 29643 | 1609   | 1980   | 7.02E-33  | 0.83 |
| 29643 | 66856  | 67388  | 1.90E-11  | 0.78 |
| 29643 | 71278  | 71691  | 4.23E-10  | 0.73 |
| 29644 | 9590   | 9887   | 2.99E-12  | 0.61 |
| 29644 | 10639  | 11557  | 1.16E-105 | 0.94 |
| 29644 | 15367  | 16109  | 1.09E-44  | 0.88 |
| 29644 | 59494  | 60191  | 3.80E-19  | 0.62 |
| 29644 | 69842  | 70834  | 4.96E-52  | 0.69 |
| 29644 | 71505  | 73209  | 1.73E-105 | 0.64 |
| 29645 | 28677  | 28989  | 4.01E-21  | 0.68 |
| 29645 | 105596 | 105832 | 1.16E-13  | 0.8  |
| 29645 | 121681 | 122135 | 1.15E-03  | 0.75 |
| 29646 | 25156  | 25495  | 1.65E-65  | 0.87 |
| 29646 | 39419  | 39713  | 3.41E-17  | 0.88 |
| 29646 | 40743  | 41089  | 5.42E-35  | 0.93 |
| 29646 | 47816  | 48876  | 2.96E-45  | 0.83 |
| 29646 | 50732  | 51943  | 4.43E-75  | 0.86 |
| 29646 | 70315  | 70820  | 3.71E-25  | 0.78 |
| 29646 | 71901  | 73168  | 1.95E-55  | 0.76 |
| 29646 | 84112  | 84367  | 3.60E-18  | 0.64 |
| 29646 | 98799  | 99651  | 1.34E-189 | 0.81 |
| 29646 | 101167 | 101585 | 5.73E-92  | 0.89 |
| 29646 | 101834 | 102150 | 2.28E-71  | 0.87 |
| 29646 | 102361 | 102616 | 4.55E-33  | 0.84 |

|       |        |        |           |      |
|-------|--------|--------|-----------|------|
| 29646 | 105308 | 106029 | 2.32E-31  | 0.86 |
| 29646 | 107323 | 108687 | 7.61E-66  | 0.68 |
| 29646 | 132733 | 133467 | 3.26E-47  | 0.78 |
| 29646 | 133729 | 134195 | 1.42E-72  | 0.81 |
| 29646 | 156506 | 157645 | 4.27E-100 | 0.87 |
| 29646 | 158550 | 159307 | 1.25E-24  | 0.77 |
| 29646 | 160276 | 161183 | 1.09E-23  | 0.84 |
| 29646 | 167816 | 168786 | 5.32E-47  | 0.79 |
| 29646 | 169650 | 170582 | 2.18E-36  | 0.75 |
| 29646 | 171694 | 172230 | 2.11E-33  | 0.93 |
| 29646 | 186384 | 186701 | 8.37E-06  | 0.77 |
| 29646 | 197332 | 198020 | 3.53E-32  | 0.87 |
| 29646 | 246927 | 247452 | 5.13E-33  | 0.9  |
| 29646 | 247708 | 248553 | 3.52E-32  | 0.88 |
| 29646 | 253950 | 255764 | 2.24E-55  | 0.66 |
| 29646 | 343861 | 344422 | 2.96E-20  | 0.78 |
| 29646 | 350570 | 351187 | 3.06E-42  | 0.63 |
| 29646 | 368605 | 370072 | 2.06E-42  | 0.85 |
| 29646 | 370279 | 370592 | 3.07E-09  | 0.78 |
| 29646 | 370782 | 371037 | 1.98E-19  | 0.81 |
| 29646 | 375713 | 376025 | 6.70E-42  | 0.87 |
| 29646 | 381273 | 382863 | 9.34E-88  | 0.77 |
| 29646 | 399629 | 400900 | 8.83E-55  | 0.69 |
| 29646 | 409323 | 409912 | 3.40E-13  | 0.79 |
| 29647 | 2083   | 2384   | 2.47E-06  | 0.78 |
| 29647 | 5170   | 5673   | 3.63E-21  | 0.81 |
| 29647 | 5302   | 5851   | 1.84E-28  | 0.83 |
| 29647 | 22935  | 23643  | 2.43E-26  | 0.8  |
| 29647 | 24218  | 24497  | 2.35E-38  | 0.88 |
| 29647 | 27239  | 27545  | 2.10E-31  | 0.93 |
| 29647 | 30438  | 32049  | 2.99E-68  | 0.65 |
| 29647 | 33021  | 33876  | 1.52E-83  | 0.93 |
| 29647 | 35117  | 35432  | 5.87E-30  | 0.95 |
| 29647 | 35676  | 36123  | 6.88E-38  | 0.96 |
| 29647 | 38420  | 39196  | 5.87E-54  | 0.92 |
| 29647 | 44397  | 46047  | 1.62E-114 | 0.86 |
| 29647 | 62280  | 64512  | 9.76E-141 | 0.86 |
| 29647 | 64716  | 65497  | 1.07E-38  | 0.93 |
| 29647 | 72461  | 72858  | 6.92E-17  | 0.79 |
| 29647 | 89127  | 89477  | 9.56E-28  | 0.89 |
| 29647 | 90505  | 91511  | 7.27E-57  | 0.88 |
| 29647 | 96480  | 97014  | 1.43E-28  | 0.89 |
| 29647 | 98077  | 98625  | 4.01E-41  | 0.61 |
| 29647 | 101866 | 104014 | 9.83E-61  | 0.7  |
| 29647 | 104664 | 105204 | 2.44E-40  | 0.84 |
| 29647 | 105221 | 105537 | 1.77E-23  | 0.88 |
| 29647 | 124970 | 126101 | 3.71E-50  | 0.89 |
| 29647 | 177170 | 177642 | 9.26E-41  | 0.88 |
| 29647 | 196695 | 197571 | 1.27E-31  | 0.69 |
| 29647 | 231874 | 232363 | 7.70E-16  | 0.74 |
| 29647 | 232647 | 233273 | 1.39E-19  | 0.82 |
| 29647 | 268004 | 268567 | 1.00E-25  | 0.77 |
| 29647 | 270349 | 270791 | 5.09E-19  | 0.84 |

|       |        |        |           |      |
|-------|--------|--------|-----------|------|
| 29647 | 318117 | 318528 | 2.75E-09  | 0.81 |
| 29647 | 325057 | 325451 | 6.40E-17  | 0.76 |
| 29647 | 335291 | 335514 | 2.09E-24  | 0.87 |
| 29647 | 363851 | 364436 | 1.22E-39  | 0.83 |
| 29647 | 380966 | 381486 | 2.14E-49  | 0.86 |
| 29647 | 383959 | 384251 | 8.51E-16  | 0.75 |
| 29647 | 394804 | 396177 | 1.21E-90  | 0.84 |
| 29647 | 399319 | 399685 | 3.56E-25  | 0.88 |
| 29647 | 400087 | 400290 | 2.26E-36  | 0.96 |
| 29647 | 404635 | 404979 | 4.55E-19  | 0.67 |
| 29647 | 443873 | 444705 | 1.92E-36  | 0.85 |
| 29647 | 446375 | 447327 | 1.82E-74  | 0.92 |
| 29647 | 447697 | 448302 | 7.07E-19  | 0.82 |
| 29647 | 448635 | 449105 | 2.25E-80  | 0.9  |
| 29647 | 449342 | 450984 | 8.88E-64  | 0.78 |
| 29647 | 511086 | 511476 | 1.53E-31  | 0.89 |
| 29647 | 517548 | 517985 | 5.88E-25  | 0.86 |
| 29647 | 533539 | 534135 | 2.87E-35  | 0.96 |
| 29647 | 534715 | 535655 | 1.10E-26  | 0.76 |
| 29647 | 542105 | 542735 | 3.80E-42  | 0.88 |
| 29647 | 546846 | 547985 | 3.39E-48  | 0.8  |
| 29647 | 567746 | 568429 | 4.67E-27  | 0.8  |
| 29647 | 588770 | 589127 | 3.91E-13  | 0.94 |
| 29647 | 589419 | 589877 | 9.27E-11  | 0.94 |
| 29647 | 608185 | 608673 | 5.19E-22  | 0.87 |
| 29647 | 619339 | 619668 | 1.52E-08  | 0.8  |
| 29647 | 640764 | 641487 | 1.37E-57  | 0.81 |
| 29647 | 642087 | 642466 | 1.30E-24  | 0.69 |
| 29647 | 667080 | 667692 | 9.34E-26  | 0.74 |
| 29647 | 668336 | 668980 | 5.10E-47  | 0.91 |
| 29647 | 670328 | 671140 | 2.30E-49  | 0.77 |
| 29647 | 673057 | 673442 | 1.33E-37  | 0.84 |
| 29647 | 710914 | 711394 | 1.73E-37  | 0.92 |
| 29647 | 711923 | 712644 | 1.03E-84  | 0.81 |
| 29647 | 716691 | 717264 | 1.43E-54  | 0.81 |
| 29647 | 722076 | 723046 | 8.97E-43  | 0.84 |
| 29647 | 726377 | 727248 | 1.17E-37  | 0.86 |
| 29647 | 738738 | 739319 | 1.61E-29  | 0.73 |
| 29647 | 743065 | 743341 | 2.11E-40  | 0.89 |
| 29648 | 13182  | 13636  | 1.55E-26  | 0.77 |
| 29648 | 36472  | 37042  | 1.36E-28  | 0.82 |
| 29648 | 41892  | 42293  | 5.86E-39  | 0.97 |
| 29648 | 48224  | 49031  | 7.19E-55  | 0.85 |
| 29648 | 49061  | 49348  | 1.09E-17  | 0.86 |
| 29648 | 84504  | 84753  | 1.29E-14  | 0.91 |
| 29648 | 95128  | 96765  | 1.36E-163 | 0.89 |
| 29648 | 97211  | 97752  | 4.20E-77  | 0.88 |
| 29648 | 101795 | 102119 | 1.71E-06  | 0.77 |
| 29648 | 102570 | 102891 | 1.15E-11  | 0.81 |
| 29648 | 109743 | 110558 | 7.57E-42  | 0.69 |
| 29648 | 121621 | 122282 | 8.37E-43  | 0.73 |
| 29648 | 122591 | 123302 | 8.41E-89  | 0.64 |
| 29648 | 129880 | 130286 | 3.54E-13  | 0.78 |

|       |        |        |           |      |
|-------|--------|--------|-----------|------|
| 29648 | 170033 | 171167 | 1.08E-76  | 0.67 |
| 29648 | 174624 | 174842 | 7.89E-12  | 0.97 |
| 29648 | 211727 | 212116 | 7.46E-28  | 0.8  |
| 29648 | 212329 | 213103 | 4.28E-27  | 0.86 |
| 29648 | 219087 | 219395 | 8.35E-22  | 0.75 |
| 29648 | 240569 | 241349 | 5.40E-57  | 0.86 |
| 29648 | 243134 | 243360 | 8.34E-24  | 0.72 |
| 29648 | 269744 | 270219 | 2.17E-07  | 1    |
| 29648 | 315046 | 315311 | 2.62E-21  | 0.95 |
| 29648 | 341083 | 341586 | 8.24E-11  | 0.72 |
| 29648 | 344863 | 345337 | 6.65E-36  | 0.92 |
| 29648 | 372168 | 372875 | 1.39E-42  | 0.84 |
| 29648 | 373433 | 373977 | 7.50E-24  | 0.77 |
| 29648 | 374861 | 375848 | 4.12E-43  | 0.89 |
| 29648 | 376595 | 377034 | 1.04E-14  | 0.71 |
| 29648 | 382082 | 382728 | 1.22E-17  | 0.64 |
| 29648 | 385070 | 385557 | 2.01E-27  | 0.73 |
| 29648 | 401123 | 402007 | 7.99E-18  | 0.78 |
| 29648 | 408788 | 409229 | 2.66E-24  | 0.79 |
| 29648 | 420802 | 421616 | 5.05E-54  | 0.89 |
| 29648 | 422585 | 423881 | 2.11E-77  | 0.89 |
| 29648 | 425608 | 425953 | 7.67E-21  | 0.83 |
| 29648 | 427285 | 427531 | 8.89E-29  | 0.95 |
| 29648 | 448432 | 448709 | 4.08E-10  | 0.7  |
| 29648 | 457182 | 457541 | 3.33E-17  | 0.85 |
| 29648 | 462758 | 463474 | 1.88E-33  | 0.83 |
| 29648 | 473934 | 474235 | 1.31E-08  | 0.71 |
| 29648 | 481025 | 481576 | 2.10E-23  | 0.86 |
| 29648 | 484254 | 484914 | 3.76E-37  | 0.93 |
| 29648 | 486379 | 486694 | 1.97E-28  | 0.84 |
| 29648 | 487413 | 487885 | 5.89E-12  | 0.79 |
| 29648 | 493637 | 494087 | 8.45E-26  | 0.91 |
| 29648 | 495854 | 496260 | 2.63E-15  | 0.79 |
| 29648 | 528815 | 529022 | 6.19E-14  | 0.74 |
| 29648 | 529590 | 530068 | 1.75E-43  | 0.77 |
| 29648 | 532654 | 533159 | 1.92E-10  | 0.74 |
| 29648 | 535887 | 536362 | 1.31E-14  | 0.93 |
| 29648 | 537117 | 537358 | 4.25E-24  | 0.97 |
| 29648 | 542618 | 543255 | 2.44E-18  | 0.75 |
| 29648 | 543674 | 544559 | 2.44E-84  | 0.91 |
| 29648 | 581403 | 582135 | 6.98E-24  | 0.6  |
| 29648 | 607647 | 608024 | 6.14E-32  | 0.77 |
| 29648 | 610566 | 611006 | 7.01E-41  | 0.67 |
| 29648 | 671491 | 671987 | 1.65E-18  | 0.92 |
| 29648 | 672286 | 672699 | 5.44E-37  | 0.92 |
| 29648 | 720069 | 721891 | 3.67E-119 | 0.88 |
| 29648 | 722515 | 723178 | 1.11E-38  | 0.83 |
| 29648 | 729774 | 730263 | 1.39E-11  | 0.85 |
| 29648 | 766920 | 767125 | 1.85E-10  | 0.73 |
| 29648 | 767447 | 767895 | 1.25E-10  | 0.8  |
| 29648 | 769606 | 769991 | 2.30E-09  | 0.83 |
| 29648 | 770760 | 771299 | 2.41E-39  | 0.89 |
| 29648 | 771514 | 772993 | 1.44E-98  | 0.71 |

|       |        |        |           |      |
|-------|--------|--------|-----------|------|
| 29648 | 774647 | 774966 | 2.76E-13  | 0.78 |
| 29648 | 791852 | 792181 | 3.82E-10  | 0.79 |
| 29649 | 2740   | 3171   | 2.10E-09  | 0.95 |
| 29649 | 31338  | 31719  | 3.34E-13  | 0.96 |
| 29649 | 33335  | 33549  | 2.19E-18  | 0.95 |
| 29649 | 35118  | 35452  | 3.97E-11  | 0.95 |
| 29649 | 59430  | 59683  | 8.85E-16  | 0.83 |
| 29650 | 2055   | 2302   | 9.63E-12  | 0.75 |
| 29650 | 7895   | 8523   | 3.40E-43  | 0.93 |
| 29650 | 18193  | 18515  | 1.41E-06  | 0.62 |
| 29650 | 29829  | 30325  | 1.46E-07  | 0.7  |
| 29650 | 34555  | 35087  | 8.34E-14  | 0.77 |
| 29650 | 43583  | 45278  | 6.81E-117 | 0.88 |
| 29650 | 45498  | 46052  | 1.43E-89  | 0.92 |
| 29650 | 48406  | 48870  | 3.20E-18  | 0.64 |
| 29650 | 50433  | 50899  | 1.72E-16  | 0.77 |
| 29650 | 51885  | 52723  | 1.65E-35  | 0.63 |
| 29650 | 57350  | 57996  | 8.06E-21  | 0.8  |
| 29650 | 58863  | 60143  | 1.30E-35  | 0.83 |
| 29650 | 63946  | 64268  | 9.28E-15  | 0.81 |
| 29650 | 71645  | 72199  | 1.90E-78  | 0.94 |
| 29650 | 101954 | 102308 | 8.51E-20  | 0.93 |
| 29650 | 113260 | 113678 | 4.23E-22  | 0.94 |
| 29650 | 114554 | 115001 | 5.95E-18  | 0.81 |
| 29650 | 115217 | 116384 | 1.99E-43  | 0.81 |
| 29650 | 121198 | 121594 | 6.54E-13  | 0.77 |
| 29650 | 140558 | 140791 | 1.47E-14  | 0.92 |
| 29650 | 156282 | 157050 | 4.83E-64  | 0.73 |
| 29650 | 157830 | 158233 | 1.32E-36  | 0.93 |
| 29650 | 159055 | 160075 | 3.04E-61  | 0.81 |
| 29650 | 161649 | 162784 | 9.33E-76  | 0.87 |
| 29650 | 166891 | 167313 | 2.73E-39  | 0.94 |
| 29650 | 170613 | 170890 | 2.63E-08  | 0.79 |
| 29650 | 191092 | 191313 | 1.86E-11  | 0.91 |
| 29650 | 193681 | 194586 | 4.60E-32  | 0.86 |
| 29650 | 195946 | 196150 | 3.64E-38  | 0.93 |
| 29650 | 196389 | 197210 | 6.92E-61  | 0.94 |
| 29650 | 202082 | 202305 | 8.79E-07  | 0.78 |
| 29650 | 204948 | 205546 | 9.18E-53  | 0.92 |
| 29651 | 5971   | 6316   | 4.86E-13  | 0.94 |
| 29651 | 10931  | 12149  | 1.59E-55  | 0.87 |
| 29651 | 13485  | 13832  | 1.21E-29  | 0.95 |
| 29651 | 14587  | 14994  | 6.62E-20  | 0.92 |
| 29651 | 15401  | 17163  | 3.19E-191 | 0.87 |
| 29651 | 19100  | 19456  | 1.02E-28  | 0.89 |
| 29651 | 37115  | 37506  | 1.63E-14  | 0.73 |
| 29651 | 65653  | 66413  | 2.60E-61  | 0.94 |
| 29651 | 69041  | 69569  | 9.19E-17  | 0.69 |
| 29651 | 76780  | 77059  | 7.92E-30  | 0.96 |
| 29651 | 88058  | 89371  | 1.83E-35  | 0.76 |
| 29651 | 107103 | 107356 | 4.33E-32  | 0.74 |
| 29651 | 107867 | 108473 | 9.69E-27  | 0.93 |
| 29651 | 124030 | 124671 | 7.11E-46  | 0.88 |

|       |        |        |           |      |
|-------|--------|--------|-----------|------|
| 29651 | 146039 | 146908 | 2.53E-79  | 0.85 |
| 29651 | 155209 | 155425 | 7.47E-42  | 0.95 |
| 29651 | 171711 | 172147 | 1.08E-15  | 0.87 |
| 29652 | 5270   | 5863   | 7.69E-53  | 0.76 |
| 29652 | 15616  | 15882  | 5.93E-10  | 0.93 |
| 29652 | 45519  | 45785  | 8.18E-11  | 0.82 |
| 29652 | 72426  | 72878  | 3.39E-08  | 0.84 |
| 29652 | 134957 | 135387 | 2.56E-21  | 0.82 |
| 29652 | 177561 | 178455 | 2.01E-49  | 0.87 |
| 29652 | 180729 | 181644 | 3.66E-51  | 0.87 |
| 29652 | 263454 | 263714 | 2.32E-11  | 0.91 |
| 29652 | 317142 | 317460 | 1.17E-16  | 0.77 |
| 29652 | 325920 | 327151 | 2.05E-43  | 0.9  |
| 29652 | 335661 | 336184 | 1.49E-61  | 0.88 |
| 29652 | 356512 | 356991 | 7.54E-38  | 0.89 |
| 29652 | 383728 | 384507 | 3.40E-62  | 0.67 |
| 29652 | 384768 | 385354 | 6.27E-26  | 0.73 |
| 29653 | 29761  | 30008  | 9.94E-20  | 0.92 |
| 29653 | 50309  | 50863  | 8.86E-47  | 0.83 |
| 29653 | 56934  | 57135  | 1.16E-11  | 0.62 |
| 29653 | 59379  | 59639  | 2.76E-12  | 0.75 |
| 29653 | 63648  | 64090  | 2.84E-16  | 0.78 |
| 29653 | 66494  | 67244  | 1.72E-35  | 0.78 |
| 29653 | 70262  | 70754  | 4.58E-27  | 0.9  |
| 29653 | 76143  | 76642  | 4.56E-22  | 0.81 |
| 29653 | 76946  | 77186  | 5.51E-27  | 0.88 |
| 29653 | 87849  | 88314  | 3.31E-11  | 0.73 |
| 29653 | 124785 | 125163 | 5.82E-06  | 0.86 |
| 29653 | 139800 | 140140 | 1.67E-21  | 0.88 |
| 29653 | 154536 | 155339 | 1.73E-67  | 0.94 |
| 29653 | 160820 | 161022 | 3.97E-08  | 0.94 |
| 29653 | 162445 | 162906 | 2.21E-13  | 0.83 |
| 29653 | 165706 | 166034 | 3.25E-41  | 0.93 |
| 29654 | 4175   | 4663   | 8.78E-28  | 0.84 |
| 29654 | 5252   | 5536   | 3.15E-11  | 0.8  |
| 29654 | 6291   | 6668   | 4.45E-38  | 0.91 |
| 29654 | 8589   | 9334   | 4.85E-33  | 0.8  |
| 29654 | 9666   | 10937  | 9.45E-59  | 0.93 |
| 29654 | 11846  | 12107  | 7.76E-40  | 0.95 |
| 29654 | 13338  | 13905  | 1.74E-52  | 0.95 |
| 29654 | 16119  | 16736  | 2.98E-21  | 0.84 |
| 29654 | 31558  | 32033  | 2.97E-04  | 0.94 |
| 29654 | 38398  | 38638  | 5.52E-13  | 0.92 |
| 29654 | 87195  | 87961  | 1.69E-38  | 0.84 |
| 29654 | 103907 | 104390 | 5.63E-23  | 0.71 |
| 29654 | 114563 | 115344 | 2.02E-23  | 0.62 |
| 29654 | 117500 | 118948 | 1.16E-65  | 0.82 |
| 29654 | 119483 | 120017 | 1.24E-59  | 0.88 |
| 29654 | 120218 | 120488 | 1.22E-09  | 0.8  |
| 29654 | 124774 | 125142 | 2.02E-23  | 0.86 |
| 29654 | 128312 | 128716 | 6.16E-11  | 0.74 |
| 29654 | 156410 | 158307 | 2.44E-204 | 0.89 |
| 29654 | 163038 | 163341 | 4.82E-26  | 0.85 |

|       |        |        |           |      |
|-------|--------|--------|-----------|------|
| 29654 | 163616 | 163914 | 9.51E-40  | 0.9  |
| 29654 | 165576 | 166368 | 4.80E-43  | 0.66 |
| 29654 | 173634 | 173860 | 5.75E-12  | 0.7  |
| 29654 | 178254 | 178750 | 1.74E-39  | 0.91 |
| 29654 | 179006 | 179500 | 9.67E-99  | 0.95 |
| 29654 | 185602 | 186046 | 1.70E-63  | 0.99 |
| 29654 | 186646 | 187373 | 1.60E-30  | 0.61 |
| 29654 | 196783 | 197190 | 1.59E-12  | 0.91 |
| 29654 | 216733 | 217224 | 2.19E-30  | 0.9  |
| 29654 | 224770 | 225246 | 3.22E-19  | 0.84 |
| 29656 | 21     | 329    | 2.68E-29  | 0.8  |
| 29656 | 848    | 1309   | 6.31E-43  | 0.93 |
| 29656 | 22929  | 23503  | 4.22E-23  | 0.77 |
| 29656 | 25104  | 25419  | 5.38E-28  | 0.67 |
| 29656 | 29416  | 29636  | 2.12E-13  | 0.78 |
| 29656 | 71633  | 72098  | 7.92E-19  | 0.87 |
| 29656 | 80447  | 81085  | 6.31E-51  | 0.91 |
| 29656 | 83325  | 83576  | 3.35E-13  | 0.83 |
| 29656 | 91315  | 91763  | 1.83E-42  | 0.91 |
| 29656 | 91993  | 92273  | 3.43E-30  | 0.82 |
| 29656 | 92540  | 93145  | 5.86E-50  | 0.76 |
| 29656 | 100071 | 101714 | 6.99E-55  | 0.76 |
| 29656 | 106240 | 106461 | 8.29E-11  | 0.8  |
| 29656 | 125605 | 126283 | 2.55E-33  | 0.85 |
| 29656 | 137039 | 138060 | 6.55E-42  | 0.81 |
| 29656 | 140674 | 141082 | 1.64E-21  | 0.93 |
| 29656 | 141319 | 141658 | 4.06E-67  | 0.85 |
| 29656 | 171340 | 171924 | 3.09E-15  | 0.93 |
| 29656 | 183639 | 183900 | 3.51E-24  | 0.93 |
| 29656 | 184128 | 185640 | 6.97E-72  | 0.88 |
| 29656 | 193219 | 193560 | 2.55E-20  | 0.71 |
| 29656 | 194249 | 195405 | 1.10E-64  | 0.87 |
| 29656 | 205496 | 205826 | 2.60E-49  | 0.91 |
| 29656 | 223387 | 223622 | 6.01E-06  | 0.61 |
| 29657 | 12517  | 15051  | 5.18E-79  | 0.75 |
| 29657 | 21903  | 22138  | 1.09E-07  | 0.65 |
| 29657 | 46785  | 47196  | 2.00E-14  | 0.79 |
| 29657 | 56282  | 57481  | 1.36E-38  | 0.63 |
| 29657 | 77279  | 77744  | 4.91E-32  | 0.94 |
| 29657 | 80712  | 81110  | 1.42E-17  | 0.86 |
| 29657 | 82877  | 83541  | 2.35E-107 | 0.95 |
| 29657 | 84999  | 85236  | 2.46E-15  | 0.85 |
| 29657 | 87983  | 88372  | 1.11E-30  | 0.89 |
| 29657 | 89438  | 89926  | 1.30E-18  | 0.85 |
| 29657 | 90171  | 90735  | 6.08E-35  | 0.85 |
| 29657 | 95526  | 95974  | 5.61E-17  | 0.81 |
| 29657 | 154266 | 154476 | 1.36E-11  | 0.67 |
| 29657 | 177286 | 178068 | 2.64E-47  | 0.87 |
| 29657 | 179644 | 180753 | 2.33E-77  | 0.88 |
| 29657 | 181980 | 182551 | 2.50E-35  | 0.79 |
| 29657 | 182822 | 183178 | 2.59E-16  | 0.82 |
| 29657 | 190812 | 191308 | 1.46E-23  | 0.85 |
| 29657 | 192192 | 192524 | 3.21E-19  | 0.93 |

|       |        |        |           |      |
|-------|--------|--------|-----------|------|
| 29657 | 211646 | 212268 | 1.91E-32  | 0.79 |
| 29658 | 9907   | 10176  | 1.08E-06  | 0.8  |
| 29658 | 57621  | 57929  | 2.49E-04  | 0.83 |
| 29659 | 8319   | 8554   | 4.46E-12  | 0.84 |
| 29659 | 21845  | 22341  | 2.12E-24  | 0.91 |
| 29659 | 32779  | 33311  | 8.30E-24  | 0.88 |
| 29659 | 34223  | 34514  | 1.23E-40  | 0.98 |
| 29659 | 45173  | 46171  | 1.26E-28  | 0.7  |
| 29659 | 46408  | 46939  | 1.47E-19  | 0.63 |
| 29659 | 53146  | 54675  | 4.89E-101 | 0.67 |
| 29659 | 55699  | 56890  | 7.03E-110 | 0.9  |
| 29659 | 66893  | 67120  | 1.33E-15  | 0.89 |
| 29659 | 67371  | 68178  | 1.37E-69  | 0.87 |
| 29659 | 76427  | 76767  | 1.13E-05  | 0.81 |
| 29659 | 104491 | 105008 | 8.44E-13  | 0.7  |
| 29660 | 2817   | 3460   | 4.30E-42  | 0.9  |
| 29660 | 23680  | 24718  | 1.10E-68  | 0.79 |
| 29660 | 26401  | 26822  | 1.13E-30  | 0.98 |
| 29660 | 50388  | 50594  | 4.38E-54  | 0.95 |
| 29660 | 50912  | 51587  | 2.09E-24  | 0.81 |
| 29660 | 52853  | 53273  | 1.01E-31  | 0.77 |
| 29660 | 53610  | 54280  | 3.20E-86  | 0.85 |
| 29660 | 58709  | 59070  | 6.18E-14  | 0.78 |
| 29660 | 62581  | 62860  | 1.42E-21  | 0.93 |
| 29660 | 70409  | 70686  | 7.07E-14  | 0.84 |
| 29660 | 95630  | 96137  | 6.32E-50  | 0.84 |
| 29660 | 96874  | 97112  | 9.94E-28  | 0.96 |
| 29660 | 97478  | 98757  | 6.13E-156 | 0.91 |
| 29660 | 99968  | 100211 | 4.72E-42  | 0.95 |
| 29660 | 100821 | 101416 | 3.85E-91  | 0.9  |
| 29660 | 102047 | 102527 | 5.75E-82  | 0.66 |
| 29660 | 103085 | 103438 | 7.25E-30  | 0.84 |
| 29660 | 103663 | 103993 | 1.36E-23  | 0.82 |
| 29660 | 120724 | 121159 | 6.76E-32  | 0.84 |
| 29660 | 121368 | 122263 | 7.10E-40  | 0.84 |
| 29660 | 122510 | 123014 | 2.13E-54  | 0.85 |
| 29660 | 126428 | 127223 | 1.25E-11  | 0.64 |
| 29660 | 135438 | 136896 | 1.03E-33  | 0.75 |
| 29660 | 137942 | 138271 | 8.35E-15  | 0.72 |
| 29660 | 140245 | 141137 | 9.76E-28  | 0.79 |
| 29660 | 148009 | 148439 | 1.83E-14  | 0.8  |
| 29660 | 171325 | 171571 | 4.74E-09  | 0.83 |
| 29660 | 213744 | 214019 | 6.25E-22  | 0.95 |
| 29660 | 222058 | 222463 | 4.72E-19  | 0.78 |
| 29660 | 223767 | 224159 | 1.24E-14  | 0.89 |
| 29660 | 225225 | 225570 | 5.18E-15  | 0.91 |
| 29660 | 228537 | 229255 | 9.55E-44  | 0.88 |
| 29660 | 231234 | 231764 | 5.23E-99  | 0.76 |
| 29660 | 244996 | 245215 | 5.08E-24  | 0.63 |
| 29660 | 255712 | 256339 | 3.69E-25  | 0.82 |
| 29660 | 264904 | 265936 | 5.33E-46  | 0.81 |
| 29660 | 328275 | 328662 | 1.87E-14  | 0.83 |
| 29660 | 337193 | 337517 | 2.01E-12  | 0.78 |



|       |        |        |           |      |
|-------|--------|--------|-----------|------|
| 29660 | 346725 | 347306 | 2.16E-12  | 0.78 |
| 29661 | 10598  | 12549  | 8.00E-88  | 0.84 |
| 29661 | 15362  | 15603  | 1.16E-36  | 0.74 |
| 29661 | 19389  | 19685  | 8.23E-18  | 0.65 |
| 29661 | 56080  | 56487  | 1.84E-18  | 0.65 |
| 29661 | 56725  | 57217  | 3.14E-28  | 0.91 |
| 29661 | 66498  | 67826  | 3.57E-73  | 0.93 |
| 29661 | 68044  | 68846  | 4.32E-47  | 0.95 |
| 29661 | 69347  | 69596  | 1.47E-10  | 0.6  |
| 29661 | 69837  | 70412  | 4.60E-23  | 0.85 |
| 29661 | 138076 | 138351 | 1.34E-11  | 0.64 |
| 29661 | 159594 | 159850 | 1.41E-26  | 0.88 |
| 29661 | 204858 | 206111 | 3.39E-54  | 0.79 |
| 29661 | 211351 | 211647 | 7.24E-09  | 0.82 |
| 29661 | 242542 | 242751 | 2.52E-14  | 0.83 |
| 29661 | 246654 | 247701 | 8.42E-36  | 0.78 |
| 29661 | 263763 | 264209 | 3.04E-23  | 0.84 |
| 29661 | 266395 | 266718 | 2.55E-14  | 0.71 |
| 29661 | 266968 | 267355 | 3.34E-17  | 0.73 |
| 29661 | 279254 | 279511 | 1.39E-40  | 0.83 |
| 29661 | 283983 | 284474 | 1.86E-16  | 0.76 |
| 29661 | 290695 | 291222 | 1.92E-25  | 0.77 |
| 29661 | 292241 | 292576 | 3.37E-31  | 0.84 |
| 29661 | 296344 | 296826 | 1.48E-13  | 0.81 |
| 29661 | 299591 | 300061 | 1.01E-19  | 0.83 |
| 29661 | 300379 | 300653 | 9.49E-20  | 0.93 |
| 29661 | 300942 | 301448 | 1.17E-31  | 0.91 |
| 29661 | 302617 | 303147 | 2.99E-25  | 0.77 |
| 29661 | 320027 | 320319 | 6.49E-17  | 0.84 |
| 29661 | 351537 | 352069 | 2.09E-19  | 0.8  |
| 29661 | 352612 | 353133 | 1.16E-20  | 0.75 |
| 29661 | 393316 | 393753 | 6.73E-25  | 0.69 |
| 29661 | 421060 | 421770 | 5.79E-29  | 0.89 |
| 29662 | 5553   | 5880   | 3.18E-12  | 0.89 |
| 29662 | 6129   | 7093   | 2.03E-110 | 0.91 |
| 29662 | 13473  | 13822  | 1.46E-63  | 0.96 |
| 29662 | 15024  | 15727  | 1.33E-34  | 0.77 |
| 29662 | 15945  | 16340  | 6.95E-31  | 0.93 |
| 29662 | 16542  | 16984  | 1.47E-27  | 0.96 |
| 29662 | 20972  | 21314  | 2.30E-18  | 0.87 |
| 29662 | 22195  | 22875  | 2.51E-37  | 0.88 |
| 29662 | 23233  | 24279  | 9.25E-128 | 0.89 |
| 29662 | 24922  | 25292  | 1.15E-33  | 0.92 |
| 29662 | 25498  | 25989  | 6.32E-76  | 0.86 |
| 29662 | 46264  | 46601  | 2.00E-11  | 0.81 |
| 29662 | 47122  | 47467  | 9.68E-17  | 0.94 |
| 29662 | 48911  | 49617  | 1.54E-36  | 0.87 |
| 29662 | 54993  | 55412  | 1.14E-33  | 0.91 |
| 29662 | 62275  | 62698  | 2.24E-74  | 0.95 |
| 29662 | 84087  | 84409  | 1.96E-15  | 0.82 |
| 29662 | 85577  | 85872  | 2.28E-24  | 0.85 |
| 29662 | 87389  | 88940  | 2.18E-58  | 0.79 |
| 29662 | 100107 | 100807 | 8.62E-15  | 0.83 |

|       |        |        |           |      |
|-------|--------|--------|-----------|------|
| 29662 | 104947 | 105336 | 2.01E-28  | 0.97 |
| 29662 | 109677 | 110189 | 7.58E-40  | 0.84 |
| 29662 | 111932 | 112511 | 1.75E-58  | 0.94 |
| 29662 | 178289 | 178910 | 2.36E-13  | 0.81 |
| 29662 | 179334 | 179652 | 1.08E-12  | 0.79 |
| 29662 | 191143 | 191568 | 2.23E-28  | 0.89 |
| 29662 | 193737 | 194258 | 1.41E-20  | 0.87 |
| 29662 | 194600 | 194997 | 6.66E-40  | 0.92 |
| 29662 | 195608 | 197573 | 6.87E-95  | 0.92 |
| 29662 | 209975 | 210237 | 5.19E-51  | 0.94 |
| 29662 | 211055 | 211418 | 1.97E-35  | 0.8  |
| 29662 | 212659 | 212869 | 2.96E-21  | 0.91 |
| 29662 | 215097 | 216190 | 2.24E-103 | 0.89 |
| 29662 | 216473 | 219151 | 8.03E-163 | 0.79 |
| 29662 | 220579 | 222204 | 7.40E-45  | 0.78 |
| 29662 | 224929 | 225644 | 3.06E-36  | 0.85 |
| 29662 | 232490 | 233030 | 1.20E-14  | 0.77 |
| 29662 | 268900 | 269168 | 2.71E-07  | 0.85 |
| 29662 | 272372 | 272864 | 5.13E-19  | 0.83 |
| 29662 | 276062 | 276746 | 7.34E-27  | 0.95 |
| 29662 | 285669 | 286080 | 1.74E-50  | 0.95 |
| 29662 | 294406 | 294717 | 3.48E-04  | 0.9  |
| 29665 | 22353  | 22957  | 5.97E-30  | 0.89 |
| 29665 | 27468  | 27982  | 4.41E-31  | 0.81 |
| 29665 | 31368  | 32401  | 4.93E-151 | 0.92 |
| 29666 | 26787  | 27683  | 1.76E-51  | 0.85 |
| 29666 | 30130  | 30504  | 1.68E-28  | 0.91 |
| 29666 | 46366  | 46664  | 6.97E-15  | 0.92 |
| 29666 | 57435  | 57693  | 1.51E-09  | 0.89 |
| 29666 | 59732  | 60088  | 2.28E-15  | 0.79 |
| 29666 | 60527  | 61153  | 5.45E-30  | 0.92 |
| 29666 | 93138  | 93520  | 1.59E-16  | 0.82 |
| 29666 | 98717  | 99184  | 3.04E-11  | 0.78 |
| 29666 | 101675 | 102435 | 2.21E-28  | 0.82 |
| 29666 | 110745 | 111273 | 1.32E-26  | 0.64 |
| 29666 | 124139 | 124504 | 2.35E-31  | 0.9  |
| 29666 | 125296 | 125787 | 2.84E-30  | 0.98 |
| 29666 | 137464 | 137772 | 5.56E-48  | 0.9  |
| 29666 | 138181 | 138451 | 5.91E-20  | 0.76 |
| 29666 | 142095 | 142418 | 1.63E-21  | 0.78 |
| 29666 | 153373 | 153856 | 9.11E-16  | 0.76 |
| 29666 | 154483 | 154910 | 1.25E-13  | 0.68 |
| 29666 | 158993 | 159448 | 1.59E-23  | 0.77 |
| 29666 | 194118 | 195537 | 8.51E-91  | 0.8  |
| 29666 | 196681 | 197296 | 5.26E-28  | 0.68 |
| 29666 | 201875 | 202295 | 3.96E-75  | 0.86 |
| 29666 | 202675 | 203129 | 3.83E-47  | 0.71 |
| 29666 | 209536 | 209878 | 3.55E-14  | 0.71 |
| 29666 | 210370 | 210765 | 2.23E-42  | 0.96 |
| 29666 | 214139 | 214426 | 5.01E-11  | 0.7  |
| 29666 | 241341 | 242364 | 4.36E-42  | 0.84 |
| 29666 | 261774 | 262571 | 1.69E-30  | 0.73 |
| 29666 | 282500 | 282920 | 1.63E-23  | 0.86 |

|       |        |        |           |      |
|-------|--------|--------|-----------|------|
| 29666 | 285052 | 286333 | 3.87E-93  | 0.94 |
| 29666 | 293376 | 293615 | 1.24E-06  | 0.84 |
| 29666 | 303428 | 303748 | 1.64E-47  | 0.85 |
| 29666 | 379726 | 380310 | 1.01E-30  | 0.92 |
| 29666 | 382382 | 382636 | 1.66E-07  | 0.8  |
| 29666 | 388556 | 389500 | 1.07E-55  | 0.69 |
| 29666 | 389866 | 390247 | 1.67E-22  | 0.81 |
| 29666 | 391471 | 392536 | 6.03E-57  | 0.87 |
| 29666 | 402576 | 402873 | 1.52E-06  | 0.89 |
| 29666 | 448927 | 450735 | 2.69E-146 | 0.83 |
| 29666 | 460290 | 460715 | 1.75E-23  | 0.69 |
| 29666 | 462161 | 462437 | 1.92E-09  | 0.69 |
| 29666 | 465753 | 466202 | 2.34E-72  | 0.89 |
| 29666 | 472517 | 473054 | 2.62E-16  | 0.8  |
| 29666 | 475566 | 475986 | 3.40E-24  | 0.79 |
| 29666 | 476765 | 477242 | 5.04E-37  | 0.94 |
| 29666 | 500597 | 501069 | 4.27E-25  | 0.6  |
| 29666 | 501274 | 502730 | 1.85E-56  | 0.76 |
| 29666 | 504186 | 504421 | 2.14E-24  | 0.93 |
| 29666 | 504704 | 505616 | 7.96E-37  | 0.92 |
| 29666 | 506143 | 506720 | 1.15E-22  | 0.81 |
| 29666 | 507791 | 508313 | 2.02E-114 | 0.94 |
| 29666 | 513776 | 514121 | 1.04E-20  | 0.87 |
| 29666 | 515460 | 515809 | 1.01E-14  | 0.83 |
| 29666 | 534240 | 534522 | 4.93E-05  | 0.81 |
| 29666 | 534724 | 534980 | 1.35E-07  | 0.68 |
| 29666 | 554026 | 554329 | 1.64E-18  | 0.8  |
| 29667 | 55356  | 55785  | 2.56E-31  | 0.91 |
| 29667 | 66199  | 66755  | 1.79E-11  | 0.77 |
| 29667 | 70516  | 71381  | 5.82E-70  | 0.88 |
| 29667 | 74643  | 75507  | 1.37E-20  | 0.6  |
| 29667 | 97001  | 97380  | 7.52E-10  | 0.95 |
| 29667 | 103147 | 104685 | 2.11E-81  | 0.89 |
| 29667 | 122816 | 123204 | 1.23E-18  | 0.86 |
| 29667 | 124539 | 125130 | 1.49E-30  | 0.83 |
| 29667 | 126193 | 127295 | 1.06E-81  | 0.93 |
| 29667 | 130410 | 130711 | 6.08E-17  | 0.88 |
| 29667 | 142795 | 143186 | 2.94E-23  | 0.63 |
| 29667 | 158715 | 159259 | 1.66E-33  | 0.93 |
| 29667 | 212246 | 212520 | 9.06E-18  | 0.69 |
| 29667 | 229511 | 230392 | 1.68E-52  | 0.95 |
| 29667 | 230850 | 231405 | 2.22E-50  | 0.96 |
| 29667 | 240440 | 241159 | 5.32E-49  | 0.89 |
| 29667 | 242058 | 242378 | 1.73E-24  | 0.77 |
| 29667 | 256753 | 257105 | 2.96E-11  | 0.8  |
| 29668 | 1778   | 2123   | 4.81E-18  | 0.64 |
| 29668 | 3050   | 3282   | 9.07E-21  | 0.9  |
| 29668 | 6505   | 7734   | 2.60E-84  | 0.84 |
| 29668 | 27163  | 30153  | 4.03E-182 | 0.89 |
| 29668 | 81612  | 82080  | 2.34E-35  | 0.71 |
| 29668 | 107384 | 107687 | 1.80E-24  | 0.99 |
| 29668 | 112597 | 112812 | 3.69E-03  | 0.87 |
| 29668 | 145232 | 145491 | 3.04E-40  | 0.97 |

|       |        |        |           |      |
|-------|--------|--------|-----------|------|
| 29668 | 145726 | 146631 | 6.27E-36  | 0.72 |
| 29668 | 147851 | 148164 | 6.56E-23  | 0.77 |
| 29668 | 176069 | 176576 | 7.18E-10  | 0.9  |
| 29668 | 181697 | 181981 | 1.28E-32  | 0.93 |
| 29668 | 182826 | 183060 | 4.47E-47  | 0.95 |
| 29668 | 185713 | 186188 | 5.82E-42  | 0.81 |
| 29668 | 210560 | 210991 | 1.05E-12  | 0.85 |
| 29668 | 214252 | 214679 | 6.83E-16  | 0.79 |
| 29668 | 214990 | 215521 | 3.95E-18  | 0.94 |
| 29668 | 226168 | 226375 | 4.26E-09  | 0.92 |
| 29668 | 235383 | 236078 | 6.53E-72  | 0.93 |
| 29668 | 243164 | 244113 | 5.28E-50  | 0.88 |
| 29668 | 244851 | 245298 | 1.35E-19  | 0.86 |
| 29668 | 245641 | 246221 | 1.62E-42  | 0.94 |
| 29668 | 264252 | 264646 | 3.91E-08  | 0.71 |
| 29669 | 22299  | 23496  | 1.39E-58  | 0.84 |
| 29669 | 29631  | 30350  | 5.36E-39  | 0.91 |
| 29669 | 33616  | 34222  | 3.28E-26  | 0.69 |
| 29669 | 35020  | 35392  | 6.11E-23  | 0.74 |
| 29669 | 35666  | 36183  | 3.32E-38  | 0.93 |
| 29669 | 36417  | 37046  | 3.63E-76  | 0.84 |
| 29669 | 46352  | 46918  | 4.79E-38  | 0.66 |
| 29669 | 57151  | 57407  | 3.14E-21  | 0.85 |
| 29669 | 74020  | 75116  | 1.55E-34  | 0.89 |
| 29669 | 118023 | 118725 | 3.95E-104 | 0.96 |
| 29669 | 144443 | 144797 | 1.87E-10  | 0.73 |
| 29669 | 151515 | 151766 | 2.78E-24  | 0.92 |
| 29669 | 182601 | 183424 | 3.15E-58  | 0.78 |
| 29669 | 197106 | 197658 | 1.85E-29  | 0.61 |
| 29669 | 201327 | 201607 | 7.34E-26  | 0.76 |
| 29669 | 232285 | 232541 | 2.49E-11  | 0.75 |
| 29669 | 236462 | 236668 | 1.84E-12  | 0.81 |
| 29669 | 244116 | 244859 | 3.58E-27  | 0.95 |
| 29669 | 247026 | 247544 | 2.51E-25  | 0.67 |
| 29669 | 250361 | 252831 | 2.19E-227 | 0.75 |
| 29669 | 253234 | 253826 | 3.53E-98  | 0.87 |
| 29669 | 256112 | 256467 | 8.97E-37  | 0.82 |
| 29669 | 309063 | 309413 | 1.51E-16  | 0.84 |
| 29669 | 313207 | 314002 | 1.58E-31  | 0.75 |
| 29669 | 315270 | 315528 | 3.20E-26  | 0.89 |
| 29669 | 319869 | 320109 | 3.77E-13  | 0.85 |
| 29670 | 21137  | 22184  | 2.47E-48  | 0.69 |
| 29670 | 33790  | 34272  | 4.77E-23  | 0.78 |
| 29670 | 35245  | 36296  | 3.25E-61  | 0.76 |
| 29670 | 36848  | 37311  | 3.21E-29  | 0.81 |
| 29670 | 37615  | 37893  | 1.37E-27  | 0.87 |
| 29670 | 42075  | 42484  | 3.30E-46  | 0.95 |
| 29670 | 42687  | 43024  | 1.91E-18  | 0.91 |
| 29670 | 48949  | 50783  | 1.28E-65  | 0.69 |
| 29670 | 51136  | 51981  | 6.75E-24  | 0.86 |
| 29670 | 68438  | 69952  | 2.31E-74  | 0.91 |
| 29670 | 81806  | 82368  | 1.68E-18  | 0.88 |
| 29670 | 87777  | 88304  | 8.30E-37  | 0.86 |

|       |        |        |           |      |
|-------|--------|--------|-----------|------|
| 29670 | 97697  | 98124  | 1.12E-24  | 0.9  |
| 29671 | 442    | 970    | 1.64E-16  | 0.66 |
| 29671 | 3387   | 3590   | 4.43E-20  | 0.82 |
| 29671 | 9078   | 9611   | 3.61E-36  | 0.91 |
| 29671 | 9902   | 10243  | 1.23E-14  | 0.91 |
| 29671 | 12372  | 14798  | 4.05E-68  | 0.72 |
| 29671 | 87935  | 88753  | 2.05E-32  | 0.73 |
| 29671 | 90377  | 91181  | 2.19E-55  | 0.95 |
| 29671 | 93048  | 93656  | 2.26E-11  | 0.71 |
| 29671 | 111864 | 112330 | 1.40E-66  | 0.96 |
| 29671 | 115624 | 117433 | 1.88E-124 | 0.9  |
| 29671 | 133646 | 134880 | 1.12E-47  | 0.9  |
| 29671 | 135258 | 135596 | 1.35E-22  | 0.81 |
| 29671 | 167343 | 167622 | 1.19E-12  | 0.91 |
| 29671 | 192120 | 192684 | 7.76E-44  | 0.89 |
| 29671 | 196682 | 197035 | 1.93E-23  | 0.96 |
| 29671 | 197254 | 197693 | 2.49E-43  | 0.95 |
| 29671 | 199266 | 199566 | 1.01E-44  | 0.89 |
| 29672 | 33164  | 33505  | 3.98E-14  | 1    |
| 29672 | 125960 | 126197 | 1.26E-14  | 0.84 |
| 29672 | 167503 | 168047 | 1.96E-40  | 0.89 |
| 29672 | 257361 | 258063 | 1.69E-06  | 0.95 |
| 29672 | 258042 | 258525 | 8.30E-05  | 0.8  |
| 29672 | 281338 | 281743 | 4.22E-04  | 0.95 |
| 29672 | 284199 | 284463 | 5.07E-13  | 0.81 |
| 29672 | 286980 | 287198 | 3.27E-15  | 0.84 |
| 29672 | 292212 | 292638 | 6.57E-07  | 0.9  |
| 29672 | 302908 | 303567 | 2.10E-39  | 0.93 |
| 29672 | 396480 | 396896 | 4.00E-10  | 0.82 |
| 29672 | 401717 | 402116 | 1.29E-27  | 0.91 |
| 29672 | 402644 | 403101 | 2.26E-28  | 0.89 |
| 29673 | 25420  | 25832  | 1.15E-11  | 0.81 |
| 29673 | 32864  | 33260  | 9.72E-31  | 0.91 |
| 29673 | 33626  | 34793  | 8.61E-40  | 0.81 |
| 29673 | 52424  | 52847  | 4.77E-28  | 0.96 |
| 29673 | 70656  | 71295  | 1.52E-34  | 0.92 |
| 29673 | 82268  | 83048  | 5.16E-30  | 0.77 |
| 29673 | 121884 | 122719 | 2.96E-31  | 0.86 |
| 29673 | 138789 | 139393 | 4.71E-78  | 0.91 |
| 29673 | 139651 | 139963 | 2.25E-25  | 0.91 |
| 29673 | 144459 | 144931 | 3.40E-29  | 0.95 |
| 29673 | 145866 | 146359 | 8.56E-42  | 0.94 |
| 29673 | 170581 | 171282 | 1.09E-39  | 0.79 |
| 29673 | 184412 | 185068 | 2.70E-26  | 0.84 |
| 29673 | 224186 | 225378 | 6.21E-56  | 0.86 |
| 29673 | 230172 | 230643 | 1.75E-32  | 0.86 |
| 29673 | 230848 | 232126 | 8.43E-50  | 0.72 |
| 29673 | 257071 | 257795 | 1.99E-40  | 0.73 |
| 29673 | 320321 | 321292 | 3.30E-46  | 0.84 |
| 29673 | 321972 | 322262 | 2.59E-12  | 0.77 |
| 29673 | 324901 | 325425 | 3.24E-38  | 0.88 |
| 29673 | 327837 | 328133 | 1.15E-25  | 0.9  |
| 29673 | 334212 | 334659 | 4.14E-37  | 0.9  |

|       |        |        |           |      |
|-------|--------|--------|-----------|------|
| 29673 | 347940 | 348599 | 5.37E-36  | 0.94 |
| 29673 | 366359 | 366974 | 5.63E-26  | 0.79 |
| 29673 | 370889 | 371747 | 2.45E-26  | 0.83 |
| 29674 | 11027  | 11325  | 1.30E-05  | 0.87 |
| 29674 | 28953  | 29340  | 9.08E-07  | 0.78 |
| 29674 | 35954  | 36268  | 1.30E-04  | 0.78 |
| 29674 | 37071  | 38097  | 2.29E-11  | 0.79 |
| 29674 | 81245  | 81459  | 1.57E-08  | 0.77 |
| 29674 | 120447 | 120755 | 3.59E-75  | 0.83 |
| 29674 | 137298 | 137640 | 9.00E-06  | 0.93 |
| 29674 | 140374 | 140714 | 6.88E-11  | 0.95 |
| 29674 | 141219 | 141779 | 8.83E-06  | 0.97 |
| 29674 | 167255 | 167547 | 8.50E-25  | 0.8  |
| 29674 | 189071 | 189337 | 5.85E-09  | 0.94 |
| 29674 | 192741 | 192998 | 7.62E-05  | 0.79 |
| 29674 | 229374 | 229747 | 1.83E-05  | 1    |
| 29674 | 234840 | 235910 | 3.63E-13  | 0.81 |
| 29674 | 254696 | 255190 | 7.00E-07  | 0.93 |
| 29674 | 287136 | 287570 | 2.05E-06  | 0.87 |
| 29674 | 290759 | 291146 | 2.83E-08  | 0.84 |
| 29674 | 303282 | 303928 | 2.73E-14  | 0.85 |
| 29674 | 326099 | 326441 | 7.08E-24  | 0.8  |
| 29675 | 9126   | 10906  | 6.03E-74  | 0.87 |
| 29675 | 51274  | 51634  | 5.75E-11  | 0.89 |
| 29675 | 109891 | 110734 | 7.80E-69  | 0.87 |
| 29675 | 122933 | 123708 | 2.29E-32  | 0.85 |
| 29675 | 124956 | 125159 | 3.12E-68  | 0.7  |
| 29675 | 130186 | 130559 | 4.99E-37  | 0.93 |
| 29675 | 156940 | 157277 | 4.50E-27  | 0.88 |
| 29675 | 181789 | 182146 | 1.26E-106 | 0.98 |
| 29675 | 189904 | 190190 | 1.96E-32  | 0.9  |
| 29675 | 193827 | 195540 | 1.42E-142 | 0.93 |
| 29675 | 225226 | 225572 | 3.13E-21  | 0.84 |
| 29675 | 226452 | 226872 | 7.45E-10  | 0.84 |
| 29675 | 327674 | 327902 | 6.49E-09  | 0.75 |
| 29676 | 5619   | 6223   | 2.95E-76  | 0.88 |
| 29676 | 54740  | 55109  | 5.05E-26  | 0.71 |
| 29676 | 79101  | 79385  | 2.11E-22  | 0.82 |
| 29676 | 84934  | 85584  | 5.25E-51  | 0.96 |
| 29676 | 85887  | 86132  | 3.42E-45  | 0.96 |
| 29676 | 87789  | 88682  | 1.22E-24  | 0.8  |
| 29676 | 110995 | 111435 | 1.20E-53  | 0.94 |
| 29676 | 141061 | 141897 | 9.14E-39  | 0.61 |
| 29676 | 144242 | 145072 | 7.41E-22  | 0.78 |
| 29676 | 155321 | 156668 | 3.28E-44  | 0.8  |
| 29676 | 173467 | 173724 | 1.29E-05  | 0.82 |
| 29676 | 191192 | 191887 | 5.61E-37  | 0.87 |
| 29676 | 203900 | 204897 | 1.33E-34  | 0.72 |
| 29676 | 206969 | 207245 | 1.91E-71  | 0.92 |
| 29676 | 215100 | 215449 | 4.88E-23  | 0.86 |
| 29676 | 215653 | 216647 | 1.98E-63  | 0.95 |
| 29676 | 224374 | 224907 | 8.87E-23  | 0.85 |
| 29676 | 226853 | 227107 | 8.31E-40  | 0.9  |

|       |        |        |          |      |
|-------|--------|--------|----------|------|
| 29676 | 260483 | 261017 | 9.99E-17 | 0.79 |
| 29676 | 336124 | 336567 | 7.63E-41 | 0.87 |
| 29676 | 342854 | 343546 | 6.50E-42 | 0.82 |
| 29676 | 363172 | 363526 | 1.39E-16 | 0.85 |
| 29676 | 367269 | 367694 | 7.14E-16 | 0.82 |
| 29676 | 371893 | 372145 | 1.71E-20 | 0.83 |
| 29676 | 420930 | 421540 | 1.12E-31 | 0.88 |
| 29676 | 434646 | 435423 | 8.14E-96 | 0.87 |
| 29676 | 436029 | 436991 | 1.49E-96 | 0.87 |
| 29676 | 441020 | 441334 | 2.19E-18 | 0.93 |
| 29676 | 441947 | 442348 | 1.44E-26 | 0.94 |
| 29676 | 445352 | 445557 | 8.88E-20 | 0.9  |
| 29676 | 487948 | 488488 | 8.84E-25 | 0.78 |
| 29676 | 567962 | 568270 | 2.08E-13 | 0.81 |
| 29676 | 580658 | 581261 | 1.23E-15 | 0.76 |
| 29676 | 596810 | 597631 | 9.30E-29 | 0.85 |
| 29677 | 23258  | 23570  | 4.30E-06 | 0.81 |
| 29677 | 73955  | 74197  | 5.82E-09 | 0.94 |
| 29677 | 110021 | 110469 | 8.01E-05 | 0.76 |
| 29677 | 177081 | 177396 | 1.09E-21 | 0.95 |
| 29677 | 237794 | 238231 | 4.80E-08 | 0.67 |
| 29677 | 240461 | 241574 | 1.07E-51 | 0.78 |
| 29677 | 242273 | 243625 | 1.98E-86 | 0.89 |
| 29677 | 246323 | 246851 | 2.31E-80 | 0.94 |
| 29677 | 343427 | 343732 | 9.85E-08 | 0.87 |
| 29678 | 3076   | 3412   | 7.37E-18 | 0.72 |
| 29678 | 23228  | 23765  | 9.20E-30 | 0.91 |
| 29678 | 26248  | 27002  | 2.04E-26 | 0.84 |
| 29678 | 27271  | 27532  | 6.78E-26 | 0.96 |
| 29678 | 28029  | 28383  | 4.33E-06 | 0.79 |
| 29678 | 32660  | 33035  | 5.13E-18 | 0.85 |
| 29678 | 33543  | 33954  | 2.01E-32 | 0.93 |
| 29678 | 40667  | 41320  | 3.20E-60 | 0.86 |
| 29678 | 41616  | 41986  | 9.56E-09 | 0.67 |
| 29678 | 49832  | 50231  | 8.40E-11 | 0.65 |
| 29678 | 62554  | 63053  | 1.42E-36 | 0.74 |
| 29678 | 64590  | 64837  | 6.85E-12 | 0.79 |
| 29678 | 97106  | 97760  | 1.17E-36 | 0.74 |
| 29678 | 98353  | 99841  | 7.66E-49 | 0.87 |
| 29678 | 100127 | 100454 | 2.65E-23 | 0.96 |
| 29678 | 100700 | 101435 | 4.87E-82 | 0.92 |
| 29678 | 101649 | 101967 | 2.03E-13 | 0.8  |
| 29678 | 131034 | 131357 | 6.98E-25 | 0.92 |
| 29678 | 131713 | 132491 | 5.94E-57 | 0.91 |
| 29678 | 161671 | 163412 | 2.59E-89 | 0.9  |
| 29678 | 198287 | 198539 | 5.11E-10 | 0.69 |
| 29679 | 64     | 667    | 2.18E-14 | 0.89 |
| 29679 | 25553  | 25980  | 2.18E-16 | 0.74 |
| 29679 | 64299  | 64705  | 2.08E-22 | 0.79 |
| 29679 | 65203  | 65892  | 1.30E-47 | 0.88 |
| 29679 | 67941  | 68337  | 9.14E-24 | 0.91 |
| 29679 | 105065 | 105684 | 9.19E-11 | 0.81 |
| 29679 | 112861 | 113181 | 3.09E-24 | 0.79 |

|       |        |        |           |      |
|-------|--------|--------|-----------|------|
| 29679 | 130526 | 131605 | 4.87E-100 | 0.72 |
| 29679 | 150936 | 151143 | 1.11E-36  | 0.88 |
| 29679 | 157672 | 158049 | 1.45E-81  | 0.92 |
| 29680 | 12059  | 12803  | 2.30E-61  | 0.83 |
| 29680 | 20665  | 20955  | 5.38E-24  | 0.93 |
| 29680 | 26290  | 27106  | 9.95E-46  | 0.81 |
| 29680 | 35606  | 35838  | 2.33E-18  | 0.79 |
| 29680 | 153625 | 153830 | 6.97E-18  | 0.85 |
| 29680 | 156904 | 157338 | 3.24E-20  | 0.65 |
| 29680 | 162930 | 163485 | 1.42E-25  | 0.83 |
| 29680 | 194895 | 195444 | 1.15E-23  | 0.87 |
| 29680 | 201607 | 202410 | 7.12E-30  | 0.82 |
| 29680 | 208232 | 208628 | 1.42E-38  | 0.78 |
| 29680 | 208923 | 209354 | 8.86E-36  | 0.83 |
| 29680 | 228193 | 230246 | 1.13E-77  | 0.77 |
| 29680 | 231050 | 231350 | 5.93E-15  | 0.78 |
| 29680 | 235281 | 236275 | 8.96E-29  | 0.76 |
| 29680 | 251080 | 251825 | 3.36E-37  | 0.88 |
| 29680 | 252301 | 252626 | 6.26E-22  | 0.77 |
| 29680 | 252911 | 253784 | 2.50E-70  | 0.93 |
| 29680 | 254554 | 255508 | 1.29E-127 | 0.86 |
| 29680 | 256074 | 258980 | 3.49E-270 | 0.9  |
| 29680 | 259350 | 260083 | 4.84E-45  | 0.82 |
| 29680 | 271744 | 272394 | 2.84E-29  | 0.81 |
| 29680 | 274937 | 275436 | 2.73E-17  | 0.7  |
| 29680 | 284149 | 284425 | 1.71E-33  | 0.89 |
| 29680 | 291630 | 291902 | 6.35E-20  | 0.94 |
| 29680 | 301044 | 301436 | 1.01E-11  | 0.8  |
| 29680 | 309583 | 310226 | 1.55E-13  | 0.65 |
| 29680 | 313392 | 314076 | 1.29E-54  | 0.81 |
| 29680 | 318121 | 318396 | 2.36E-20  | 0.81 |
| 29680 | 326828 | 327344 | 3.48E-19  | 0.66 |
| 29680 | 330675 | 331422 | 2.35E-19  | 0.87 |
| 29680 | 343022 | 343481 | 3.44E-21  | 0.82 |
| 29680 | 365581 | 365990 | 3.12E-47  | 0.9  |
| 29680 | 366413 | 366738 | 1.43E-16  | 0.68 |
| 29680 | 381165 | 381766 | 7.19E-43  | 0.84 |
| 29680 | 381974 | 383064 | 4.91E-150 | 0.8  |
| 29680 | 388265 | 389036 | 1.71E-41  | 0.89 |
| 29680 | 389505 | 390245 | 3.16E-15  | 0.74 |
| 29680 | 391115 | 392208 | 3.43E-38  | 0.88 |
| 29680 | 393153 | 393466 | 3.83E-25  | 0.8  |
| 29680 | 421976 | 422313 | 5.81E-24  | 0.9  |
| 29680 | 448418 | 448725 | 4.16E-26  | 0.87 |
| 29680 | 449677 | 449944 | 1.90E-16  | 0.77 |
| 29680 | 451654 | 452418 | 1.35E-55  | 0.98 |
| 29680 | 457312 | 458239 | 1.22E-52  | 0.87 |
| 29680 | 460285 | 460506 | 3.99E-11  | 0.69 |
| 29680 | 471918 | 472217 | 7.45E-25  | 0.92 |
| 29680 | 485142 | 485963 | 1.63E-52  | 0.83 |
| 29680 | 486311 | 486516 | 1.02E-19  | 0.88 |
| 29680 | 503710 | 504998 | 1.08E-45  | 0.78 |
| 29680 | 510802 | 511246 | 8.07E-23  | 0.87 |



|       |        |        |           |      |
|-------|--------|--------|-----------|------|
| 29680 | 511639 | 512178 | 4.54E-39  | 0.87 |
| 29680 | 512400 | 512821 | 2.96E-16  | 0.76 |
| 29680 | 513608 | 514515 | 1.16E-73  | 0.89 |
| 29680 | 514966 | 515314 | 9.53E-09  | 0.85 |
| 29680 | 516861 | 517802 | 3.84E-52  | 0.85 |
| 29680 | 522087 | 522687 | 9.85E-45  | 0.92 |
| 29680 | 591454 | 591774 | 3.07E-34  | 0.89 |
| 29680 | 591999 | 592432 | 4.18E-32  | 0.82 |
| 29680 | 599317 | 599943 | 5.72E-26  | 0.84 |
| 29680 | 621623 | 621947 | 9.55E-24  | 0.82 |
| 29681 | 13473  | 14181  | 1.48E-26  | 0.85 |
| 29681 | 21752  | 22342  | 2.15E-34  | 0.76 |
| 29681 | 24785  | 25404  | 4.09E-29  | 0.71 |
| 29681 | 26427  | 26737  | 1.86E-10  | 0.76 |
| 29681 | 37778  | 38558  | 4.59E-39  | 0.84 |
| 29681 | 39028  | 40381  | 1.47E-62  | 0.7  |
| 29681 | 42889  | 43847  | 1.87E-46  | 0.84 |
| 29681 | 45257  | 46415  | 7.26E-36  | 0.84 |
| 29681 | 46646  | 47089  | 2.31E-46  | 0.91 |
| 29681 | 47521  | 48022  | 6.51E-37  | 0.84 |
| 29681 | 84942  | 85718  | 1.52E-14  | 0.67 |
| 29681 | 89395  | 89697  | 1.65E-07  | 0.83 |
| 29681 | 101830 | 102548 | 5.07E-17  | 0.77 |
| 29681 | 138580 | 138884 | 1.15E-08  | 0.62 |
| 29681 | 141279 | 143335 | 9.54E-90  | 0.83 |
| 29681 | 147515 | 147983 | 3.42E-11  | 0.72 |
| 29681 | 155409 | 156925 | 4.29E-113 | 0.87 |
| 29681 | 179065 | 180378 | 5.23E-63  | 0.72 |
| 29681 | 181062 | 182103 | 9.37E-45  | 0.75 |
| 29681 | 186592 | 186950 | 3.50E-31  | 0.62 |
| 29681 | 187218 | 188503 | 9.14E-120 | 0.89 |
| 29681 | 188773 | 189369 | 1.09E-26  | 0.71 |
| 29681 | 211563 | 211810 | 7.50E-16  | 0.73 |
| 29681 | 214169 | 214980 | 9.31E-39  | 0.81 |
| 29681 | 254852 | 255461 | 2.92E-17  | 0.89 |
| 29681 | 256607 | 257412 | 5.88E-22  | 0.68 |
| 29681 | 281378 | 281581 | 8.56E-16  | 0.82 |
| 29681 | 344154 | 344391 | 2.06E-16  | 0.78 |
| 29681 | 347822 | 348346 | 3.79E-31  | 0.65 |
| 29681 | 360152 | 360401 | 2.13E-19  | 0.64 |
| 29681 | 361976 | 362353 | 2.43E-24  | 0.88 |
| 29681 | 374626 | 375197 | 3.09E-23  | 0.86 |
| 29681 | 375493 | 375861 | 2.24E-25  | 0.83 |
| 29681 | 376071 | 377138 | 2.19E-41  | 0.81 |
| 29681 | 377441 | 378645 | 9.86E-62  | 0.84 |
| 29681 | 398737 | 399037 | 7.10E-14  | 0.71 |
| 29682 | 5443   | 6104   | 5.80E-16  | 0.81 |
| 29682 | 11900  | 12449  | 1.64E-05  | 0.73 |
| 29682 | 32744  | 33568  | 3.35E-38  | 0.88 |
| 29682 | 34097  | 34500  | 5.80E-35  | 0.91 |
| 29682 | 37137  | 37846  | 6.76E-24  | 0.8  |
| 29682 | 37304  | 38037  | 3.16E-28  | 0.79 |
| 29682 | 38331  | 39443  | 1.68E-66  | 0.94 |

|       |        |        |          |      |
|-------|--------|--------|----------|------|
| 29682 | 64289  | 64708  | 3.99E-20 | 0.7  |
| 29682 | 80135  | 81275  | 7.50E-80 | 0.77 |
| 29682 | 139797 | 140348 | 4.24E-38 | 0.63 |
| 29682 | 140760 | 141110 | 2.15E-50 | 0.89 |
| 29682 | 146861 | 147089 | 8.37E-17 | 0.89 |
| 29682 | 147333 | 148149 | 3.22E-41 | 0.88 |
| 29682 | 160823 | 161369 | 1.74E-15 | 0.82 |
| 29682 | 192518 | 192823 | 8.71E-24 | 0.75 |
| 29682 | 194571 | 195337 | 1.99E-22 | 0.67 |
| 29682 | 199353 | 199606 | 1.45E-13 | 0.89 |
| 29682 | 200570 | 201604 | 3.14E-40 | 0.87 |
| 29682 | 205323 | 206151 | 3.39E-23 | 0.68 |
| 29682 | 223356 | 224369 | 8.66E-58 | 0.94 |
| 29682 | 224768 | 225073 | 5.84E-21 | 0.94 |
| 29682 | 225360 | 225724 | 1.58E-38 | 0.88 |
| 29682 | 233423 | 233668 | 8.52E-18 | 0.89 |
| 29682 | 236383 | 237219 | 1.59E-31 | 0.77 |
| 29682 | 239474 | 239702 | 1.70E-36 | 0.91 |
| 29682 | 241304 | 241781 | 3.14E-15 | 0.74 |
| 29682 | 246783 | 247144 | 1.99E-21 | 0.9  |
| 29683 | 18397  | 18732  | 3.80E-06 | 0.71 |
| 29683 | 83904  | 84136  | 1.63E-37 | 0.94 |
| 29683 | 114281 | 114933 | 1.19E-26 | 0.78 |
| 29683 | 159979 | 160402 | 3.47E-54 | 0.94 |
| 29683 | 162832 | 163418 | 6.09E-46 | 0.95 |
| 29683 | 173469 | 173836 | 6.38E-52 | 0.96 |
| 29683 | 174599 | 175303 | 9.44E-74 | 0.93 |
| 29683 | 176677 | 177644 | 1.42E-30 | 0.78 |
| 29683 | 201575 | 202224 | 7.65E-78 | 0.82 |
| 29683 | 202569 | 202872 | 4.52E-22 | 0.72 |
| 29683 | 203116 | 203519 | 3.14E-95 | 0.94 |
| 29683 | 203905 | 204835 | 5.80E-31 | 0.79 |
| 29683 | 210814 | 211200 | 4.87E-14 | 0.81 |
| 29683 | 211767 | 212543 | 5.22E-30 | 0.82 |
| 29683 | 224070 | 225051 | 1.63E-31 | 0.8  |
| 29683 | 234195 | 234789 | 2.95E-46 | 0.93 |
| 29683 | 247388 | 247606 | 2.02E-05 | 0.83 |
| 29683 | 248280 | 248840 | 5.85E-09 | 0.73 |
| 29683 | 249637 | 249888 | 5.65E-44 | 0.86 |
| 29683 | 252824 | 253025 | 2.26E-08 | 0.78 |
| 29683 | 252849 | 253176 | 7.80E-12 | 0.82 |
| 29684 | 3933   | 4286   | 7.15E-48 | 0.93 |
| 29684 | 58035  | 58262  | 1.54E-59 | 0.86 |
| 29684 | 83309  | 84458  | 4.54E-68 | 0.89 |
| 29684 | 88525  | 89031  | 4.91E-21 | 0.91 |
| 29684 | 91658  | 92574  | 2.56E-42 | 0.82 |
| 29684 | 117809 | 118260 | 1.16E-60 | 0.96 |
| 29684 | 127696 | 128114 | 3.60E-65 | 0.97 |
| 29684 | 132750 | 133854 | 1.39E-47 | 0.7  |
| 29684 | 152676 | 153365 | 2.66E-40 | 0.9  |
| 29684 | 158306 | 158897 | 4.44E-12 | 0.76 |
| 29684 | 176278 | 176614 | 2.34E-44 | 0.92 |
| 29684 | 181376 | 181673 | 6.85E-18 | 0.76 |

|       |        |        |           |      |
|-------|--------|--------|-----------|------|
| 29684 | 217451 | 217681 | 5.14E-28  | 0.94 |
| 29684 | 218835 | 219322 | 6.41E-26  | 0.85 |
| 29684 | 220897 | 221434 | 9.21E-62  | 0.93 |
| 29684 | 221687 | 222074 | 1.22E-35  | 0.87 |
| 29684 | 227144 | 228098 | 2.37E-32  | 0.72 |
| 29684 | 239824 | 240413 | 6.41E-19  | 0.78 |
| 29684 | 241129 | 241591 | 1.80E-16  | 0.81 |
| 29684 | 254802 | 255010 | 5.01E-10  | 0.78 |
| 29685 | 1559   | 1780   | 7.38E-26  | 0.91 |
| 29685 | 6455   | 7628   | 1.56E-163 | 0.91 |
| 29685 | 10234  | 10857  | 1.40E-21  | 0.68 |
| 29685 | 32121  | 32400  | 5.44E-15  | 0.79 |
| 29685 | 32289  | 32645  | 1.52E-13  | 0.85 |
| 29685 | 62904  | 63112  | 1.44E-17  | 0.89 |
| 29685 | 66726  | 67085  | 1.03E-30  | 0.82 |
| 29685 | 146203 | 147157 | 4.51E-68  | 0.62 |
| 29685 | 165193 | 165428 | 2.06E-38  | 0.93 |
| 29685 | 184621 | 185279 | 2.74E-25  | 0.87 |
| 29685 | 188278 | 188714 | 6.21E-14  | 0.81 |
| 29685 | 190542 | 190808 | 1.53E-10  | 0.83 |
| 29685 | 203621 | 204171 | 2.53E-23  | 0.81 |
| 29685 | 217273 | 217716 | 5.15E-31  | 0.83 |
| 29685 | 221116 | 221560 | 1.08E-06  | 0.84 |
| 29685 | 239724 | 240455 | 5.41E-32  | 0.77 |
| 29686 | 9719   | 10074  | 5.87E-07  | 0.95 |
| 29686 | 11267  | 11892  | 1.76E-06  | 0.89 |
| 29686 | 49705  | 50209  | 9.30E-17  | 0.78 |
| 29686 | 60882  | 61395  | 7.22E-15  | 0.83 |
| 29686 | 64476  | 66017  | 2.69E-98  | 0.95 |
| 29686 | 68476  | 68730  | 6.47E-26  | 0.92 |
| 29686 | 70447  | 71006  | 2.35E-19  | 0.85 |
| 29686 | 71722  | 72023  | 1.82E-22  | 0.9  |
| 29686 | 74513  | 75777  | 6.00E-71  | 0.75 |
| 29686 | 81586  | 82155  | 5.41E-15  | 0.86 |
| 29686 | 90050  | 90542  | 3.38E-39  | 0.92 |
| 29686 | 103944 | 104335 | 8.08E-11  | 0.66 |
| 29686 | 119584 | 119796 | 7.46E-13  | 0.9  |
| 29686 | 124164 | 124893 | 1.15E-72  | 0.68 |
| 29686 | 125313 | 125651 | 3.94E-81  | 0.81 |
| 29686 | 147646 | 148018 | 2.65E-09  | 0.81 |
| 29686 | 151927 | 152700 | 1.77E-36  | 0.85 |
| 29686 | 154259 | 154736 | 3.59E-68  | 0.96 |
| 29686 | 159005 | 159340 | 1.65E-26  | 0.87 |
| 29686 | 172892 | 173366 | 1.02E-13  | 0.83 |
| 29686 | 210686 | 210948 | 6.27E-30  | 0.88 |
| 29686 | 211379 | 211617 | 1.82E-15  | 0.82 |
| 29686 | 224954 | 225626 | 1.92E-26  | 0.81 |
| 29686 | 235808 | 236429 | 9.86E-25  | 0.68 |
| 29686 | 259033 | 259547 | 5.19E-28  | 0.8  |
| 29686 | 259601 | 260119 | 5.96E-38  | 0.87 |
| 29686 | 294618 | 295179 | 2.76E-58  | 0.9  |
| 29686 | 295397 | 295752 | 2.79E-19  | 0.79 |
| 29686 | 303498 | 303853 | 3.68E-21  | 0.85 |

|       |        |        |           |      |
|-------|--------|--------|-----------|------|
| 29686 | 312273 | 312572 | 1.10E-27  | 0.98 |
| 29686 | 317255 | 318003 | 6.91E-36  | 0.7  |
| 29686 | 322947 | 324038 | 2.40E-87  | 0.72 |
| 29686 | 324431 | 325419 | 1.96E-109 | 0.89 |
| 29686 | 344473 | 345272 | 8.32E-45  | 0.89 |
| 29686 | 358741 | 359038 | 6.44E-37  | 0.8  |
| 29686 | 393300 | 393752 | 6.53E-16  | 0.77 |
| 29686 | 405911 | 408026 | 2.81E-40  | 0.67 |
| 29687 | 17410  | 17714  | 7.31E-19  | 0.84 |
| 29687 | 19720  | 20281  | 3.72E-14  | 0.81 |
| 29687 | 40735  | 41352  | 8.61E-62  | 0.92 |
| 29687 | 58709  | 59032  | 4.02E-33  | 0.78 |
| 29687 | 62564  | 62830  | 3.68E-15  | 0.78 |
| 29687 | 67915  | 68271  | 1.79E-16  | 0.78 |
| 29687 | 68573  | 68825  | 7.44E-11  | 0.81 |
| 29687 | 71604  | 72286  | 6.94E-42  | 0.72 |
| 29687 | 72944  | 73575  | 7.24E-32  | 0.8  |
| 29687 | 81139  | 81668  | 8.76E-24  | 0.83 |
| 29687 | 89916  | 90139  | 3.93E-31  | 0.86 |
| 29687 | 90168  | 90675  | 1.00E-39  | 0.91 |
| 29687 | 91318  | 92235  | 1.30E-14  | 0.79 |
| 29687 | 101163 | 101763 | 4.31E-43  | 0.63 |
| 29687 | 103913 | 104272 | 1.34E-10  | 0.73 |
| 29687 | 108880 | 110111 | 2.31E-78  | 0.81 |
| 29687 | 110424 | 110735 | 1.64E-16  | 0.77 |
| 29687 | 111737 | 112614 | 1.90E-70  | 0.76 |
| 29687 | 115118 | 115562 | 6.51E-13  | 0.77 |
| 29687 | 126356 | 127500 | 9.04E-44  | 0.75 |
| 29687 | 129307 | 129547 | 2.20E-49  | 0.99 |
| 29687 | 129912 | 130890 | 2.17E-68  | 0.78 |
| 29687 | 165796 | 166058 | 4.97E-08  | 0.62 |
| 29687 | 166953 | 167583 | 5.60E-12  | 0.76 |
| 29687 | 179807 | 180117 | 1.47E-38  | 0.9  |
| 29687 | 180597 | 182071 | 2.44E-126 | 0.89 |
| 29687 | 182633 | 182925 | 1.04E-30  | 0.93 |
| 29687 | 198331 | 198669 | 7.61E-19  | 0.65 |
| 29687 | 198975 | 199731 | 1.84E-38  | 0.82 |
| 29687 | 200140 | 200525 | 5.38E-42  | 0.73 |
| 29687 | 216035 | 216698 | 1.81E-25  | 0.8  |
| 29687 | 217395 | 218306 | 2.97E-63  | 0.87 |
| 29687 | 219036 | 219322 | 3.30E-35  | 0.97 |
| 29687 | 234013 | 234416 | 3.23E-10  | 0.62 |
| 29688 | 10279  | 10479  | 5.98E-32  | 0.83 |
| 29688 | 47818  | 48586  | 2.38E-46  | 0.8  |
| 29688 | 52144  | 52701  | 5.81E-14  | 0.79 |
| 29688 | 68616  | 69078  | 2.87E-48  | 0.93 |
| 29688 | 91861  | 92458  | 5.28E-35  | 0.95 |
| 29688 | 109269 | 109801 | 3.36E-64  | 0.94 |
| 29689 | 95922  | 96246  | 8.39E-08  | 0.81 |
| 29689 | 100150 | 100408 | 2.32E-24  | 0.71 |
| 29689 | 115082 | 115992 | 3.31E-53  | 0.78 |
| 29690 | 9587   | 10768  | 5.91E-31  | 0.75 |
| 29690 | 28938  | 29174  | 2.36E-07  | 0.84 |

|       |        |        |           |      |
|-------|--------|--------|-----------|------|
| 29690 | 41733  | 42755  | 3.71E-83  | 0.7  |
| 29690 | 79383  | 79929  | 3.29E-17  | 0.88 |
| 29690 | 111371 | 111778 | 2.03E-10  | 0.84 |
| 29690 | 126942 | 127167 | 8.74E-60  | 0.88 |
| 29690 | 133348 | 133561 | 4.11E-09  | 0.81 |
| 29690 | 153505 | 153777 | 1.79E-06  | 0.82 |
| 29690 | 210505 | 210826 | 4.31E-35  | 0.92 |
| 29690 | 221376 | 221666 | 1.10E-15  | 0.89 |
| 29690 | 238066 | 238393 | 2.90E-16  | 0.83 |
| 29690 | 239237 | 239694 | 2.01E-33  | 0.92 |
| 29690 | 239960 | 240512 | 5.74E-84  | 0.94 |
| 29690 | 240743 | 240974 | 5.04E-19  | 0.91 |
| 29690 | 243445 | 245040 | 5.57E-138 | 0.88 |
| 29690 | 297553 | 297887 | 2.48E-22  | 0.68 |
| 29690 | 310202 | 310619 | 3.08E-15  | 0.84 |
| 29690 | 343778 | 344637 | 1.83E-145 | 0.92 |
| 29690 | 344958 | 345687 | 3.70E-13  | 0.78 |
| 29691 | 3486   | 4215   | 5.37E-24  | 0.82 |
| 29691 | 5703   | 6250   | 1.08E-70  | 0.89 |
| 29691 | 8704   | 9692   | 2.62E-111 | 0.93 |
| 29691 | 13039  | 13346  | 3.67E-23  | 0.96 |
| 29691 | 31193  | 31487  | 8.02E-13  | 0.82 |
| 29691 | 101858 | 102861 | 2.43E-47  | 0.81 |
| 29691 | 105207 | 106386 | 6.02E-58  | 0.87 |
| 29691 | 109842 | 110081 | 1.07E-16  | 0.86 |
| 29691 | 110299 | 110605 | 1.68E-17  | 0.89 |
| 29691 | 121041 | 122221 | 8.46E-114 | 0.75 |
| 29691 | 187250 | 187570 | 1.39E-94  | 0.94 |
| 29691 | 188458 | 188858 | 1.97E-26  | 0.94 |
| 29691 | 189485 | 190131 | 4.35E-30  | 0.8  |
| 29691 | 216062 | 216757 | 3.91E-46  | 0.9  |
| 29692 | 59517  | 59720  | 8.04E-06  | 0.92 |
| 29692 | 75337  | 75626  | 1.25E-18  | 0.86 |
| 29692 | 86698  | 87060  | 1.66E-41  | 0.88 |
| 29692 | 152314 | 152621 | 5.38E-31  | 0.93 |
| 29692 | 164065 | 164805 | 7.96E-76  | 0.92 |
| 29692 | 171029 | 171686 | 1.50E-10  | 0.88 |
| 29692 | 199862 | 200827 | 6.91E-61  | 0.9  |
| 29692 | 202198 | 202643 | 7.30E-35  | 0.92 |
| 29692 | 209180 | 209869 | 4.93E-24  | 0.75 |
| 29692 | 221145 | 221591 | 1.93E-33  | 0.86 |
| 29692 | 222184 | 222719 | 1.50E-32  | 0.85 |
| 29692 | 222951 | 223284 | 3.49E-27  | 0.96 |
| 29692 | 230699 | 230904 | 9.02E-18  | 0.81 |
| 29692 | 231364 | 231827 | 1.96E-25  | 0.73 |
| 29693 | 101191 | 101504 | 7.50E-18  | 0.73 |
| 29693 | 125979 | 126554 | 3.03E-50  | 0.91 |
| 29693 | 127048 | 127690 | 1.64E-12  | 0.61 |
| 29693 | 127946 | 128592 | 4.61E-21  | 0.63 |
| 29693 | 135503 | 137008 | 1.14E-77  | 0.85 |
| 29693 | 137323 | 137819 | 6.24E-22  | 0.76 |
| 29693 | 142351 | 143051 | 4.03E-58  | 0.9  |
| 29693 | 144377 | 144860 | 5.14E-50  | 0.88 |

|       |        |        |           |      |
|-------|--------|--------|-----------|------|
| 29693 | 146262 | 147069 | 1.02E-75  | 0.85 |
| 29693 | 151487 | 152965 | 7.80E-81  | 0.67 |
| 29693 | 163660 | 164191 | 4.60E-45  | 0.83 |
| 29693 | 164469 | 164710 | 6.57E-18  | 0.76 |
| 29693 | 166365 | 166903 | 8.05E-15  | 0.77 |
| 29693 | 171986 | 172406 | 3.13E-55  | 0.96 |
| 29693 | 177890 | 178101 | 6.56E-09  | 0.8  |
| 29693 | 216069 | 216464 | 6.44E-12  | 0.7  |
| 29693 | 239700 | 240463 | 3.24E-46  | 0.87 |
| 29693 | 330727 | 332815 | 5.52E-101 | 0.88 |
| 29693 | 335122 | 335398 | 1.13E-13  | 0.72 |
| 29693 | 335725 | 337373 | 2.01E-96  | 0.88 |
| 29693 | 368711 | 371649 | 9.64E-123 | 0.89 |
| 29693 | 452267 | 452788 | 3.94E-23  | 0.84 |
| 29693 | 466257 | 466820 | 8.90E-31  | 0.81 |
| 29693 | 486639 | 487345 | 4.93E-43  | 0.82 |
| 29693 | 487988 | 488628 | 1.06E-19  | 0.67 |
| 29693 | 488855 | 489269 | 2.04E-21  | 0.86 |
| 29693 | 489489 | 490316 | 4.93E-61  | 0.77 |
| 29693 | 503920 | 504385 | 3.74E-15  | 0.82 |
| 29693 | 529666 | 530153 | 1.86E-27  | 0.76 |
| 29693 | 533741 | 534472 | 2.17E-46  | 0.85 |
| 29693 | 539477 | 540323 | 1.72E-47  | 0.87 |
| 29693 | 571592 | 572487 | 2.51E-30  | 0.8  |
| 29693 | 572711 | 575416 | 2.44E-97  | 0.85 |
| 29693 | 585457 | 586104 | 6.26E-32  | 0.79 |
| 29693 | 587114 | 587456 | 2.70E-26  | 0.8  |
| 29693 | 597106 | 597455 | 3.22E-09  | 0.62 |
| 29693 | 630081 | 631020 | 4.07E-49  | 0.91 |
| 29693 | 663436 | 664307 | 2.72E-69  | 0.88 |
| 29693 | 664792 | 665233 | 1.82E-16  | 0.85 |
| 29693 | 698287 | 699555 | 4.49E-92  | 0.95 |
| 29693 | 719425 | 720098 | 5.18E-29  | 0.78 |
| 29693 | 726070 | 726504 | 2.22E-11  | 0.82 |
| 29693 | 734969 | 735948 | 1.30E-60  | 0.83 |
| 29693 | 742337 | 742655 | 1.87E-21  | 0.94 |
| 29693 | 742864 | 743448 | 3.96E-46  | 0.91 |
| 29693 | 745838 | 746591 | 8.50E-29  | 0.75 |
| 29693 | 750320 | 750689 | 3.72E-18  | 0.66 |
| 29693 | 767539 | 768808 | 1.67E-59  | 0.78 |
| 29693 | 769867 | 770175 | 1.06E-40  | 0.86 |
| 29693 | 771098 | 771817 | 3.06E-94  | 0.92 |
| 29693 | 781855 | 782489 | 8.32E-45  | 0.84 |
| 29693 | 785080 | 785372 | 5.72E-45  | 0.87 |
| 29693 | 792903 | 794732 | 1.72E-44  | 0.64 |
| 29693 | 810318 | 810563 | 6.75E-20  | 0.86 |
| 29693 | 811125 | 811582 | 1.49E-29  | 0.9  |
| 29693 | 811852 | 812931 | 9.62E-39  | 0.65 |
| 29693 | 818398 | 818681 | 2.97E-29  | 0.86 |
| 29693 | 819831 | 820140 | 6.32E-12  | 0.86 |
| 29693 | 820647 | 821147 | 6.12E-22  | 0.77 |
| 29693 | 822235 | 823138 | 2.82E-36  | 0.78 |
| 29693 | 926989 | 927481 | 8.67E-45  | 0.95 |

|       |        |        |          |      |
|-------|--------|--------|----------|------|
| 29693 | 930784 | 931152 | 2.16E-44 | 0.87 |
| 29693 | 931451 | 931769 | 7.46E-17 | 0.77 |
| 29693 | 935931 | 936892 | 5.96E-45 | 0.64 |
| 29693 | 939528 | 939792 | 9.66E-28 | 0.87 |
| 29693 | 940476 | 941264 | 4.36E-70 | 0.92 |
| 29693 | 941560 | 941960 | 5.79E-85 | 0.97 |
| 29694 | 38639  | 38910  | 2.48E-05 | 0.86 |
| 29694 | 43191  | 43395  | 1.50E-07 | 0.85 |
| 29694 | 46272  | 46536  | 1.46E-05 | 0.87 |
| 29694 | 47979  | 48510  | 3.12E-23 | 0.82 |
| 29694 | 48037  | 48712  | 2.62E-22 | 0.81 |
| 29694 | 64429  | 64689  | 7.29E-05 | 0.89 |
| 29694 | 67862  | 68208  | 4.39E-05 | 0.9  |
| 29694 | 74534  | 74887  | 1.52E-09 | 0.89 |
| 29694 | 92173  | 92481  | 3.25E-04 | 0.95 |
| 29694 | 100929 | 101159 | 2.58E-08 | 0.8  |
| 29694 | 102932 | 103140 | 9.60E-06 | 0.79 |
| 29694 | 109698 | 110256 | 9.02E-13 | 0.83 |
| 29694 | 120202 | 120460 | 1.37E-05 | 0.91 |
| 29694 | 122023 | 122250 | 1.24E-11 | 0.84 |
| 29694 | 128934 | 129216 | 7.76E-12 | 0.93 |
| 29694 | 200090 | 200387 | 5.92E-10 | 0.96 |
| 29694 | 246766 | 247218 | 5.10E-07 | 0.9  |
| 29694 | 280845 | 281194 | 3.62E-05 | 0.92 |
| 29694 | 308443 | 308728 | 1.59E-05 | 0.8  |
| 29694 | 320483 | 320786 | 7.80E-09 | 0.84 |
| 29694 | 326385 | 326638 | 4.70E-11 | 0.89 |
| 29694 | 337519 | 338349 | 1.99E-17 | 0.91 |
| 29694 | 359157 | 359640 | 2.78E-06 | 0.69 |
| 29694 | 372406 | 372813 | 1.30E-10 | 0.77 |
| 29694 | 381589 | 381875 | 5.06E-05 | 0.95 |
| 29694 | 390834 | 391538 | 3.52E-13 | 0.84 |
| 29694 | 398266 | 398686 | 9.12E-05 | 1    |
| 29694 | 435895 | 436702 | 6.09E-14 | 0.86 |
| 29694 | 455306 | 455694 | 3.74E-09 | 0.79 |
| 29694 | 459121 | 459630 | 2.34E-07 | 0.94 |
| 29694 | 562967 | 563233 | 6.54E-09 | 0.93 |
| 29694 | 572419 | 572696 | 2.37E-06 | 0.77 |
| 29694 | 587818 | 588359 | 1.18E-16 | 0.89 |
| 29695 | 37315  | 37841  | 4.19E-29 | 0.97 |
| 29695 | 39019  | 39423  | 2.81E-40 | 0.9  |
| 29695 | 45581  | 45828  | 8.16E-08 | 0.88 |
| 29695 | 62934  | 63509  | 1.44E-13 | 0.81 |
| 29696 | 5753   | 6461   | 3.75E-36 | 0.69 |
| 29696 | 6689   | 7156   | 6.59E-28 | 0.78 |
| 29696 | 10191  | 10979  | 1.77E-41 | 0.69 |
| 29696 | 22807  | 23194  | 9.87E-21 | 0.89 |
| 29696 | 23411  | 24455  | 7.65E-72 | 0.93 |
| 29696 | 63169  | 63407  | 3.93E-22 | 0.92 |
| 29696 | 66304  | 66847  | 6.51E-19 | 0.74 |
| 29696 | 89800  | 90126  | 1.40E-12 | 0.79 |
| 29696 | 96074  | 96794  | 1.27E-09 | 0.63 |
| 29697 | 24440  | 24826  | 7.37E-41 | 0.88 |

|       |        |        |           |      |
|-------|--------|--------|-----------|------|
| 29697 | 163703 | 164016 | 6.90E-14  | 0.87 |
| 29697 | 167506 | 167864 | 1.71E-12  | 0.82 |
| 29697 | 235784 | 236007 | 1.67E-13  | 0.95 |
| 29697 | 287314 | 287616 | 1.60E-13  | 0.96 |
| 29697 | 309684 | 310068 | 2.91E-05  | 0.76 |
| 29697 | 322171 | 322526 | 7.08E-09  | 0.89 |
| 29697 | 335275 | 335476 | 9.62E-10  | 0.93 |
| 29697 | 353890 | 354779 | 6.52E-24  | 0.82 |
| 29698 | 35558  | 35895  | 5.25E-06  | 1    |
| 29698 | 42206  | 42850  | 1.02E-16  | 0.68 |
| 29699 | 1372   | 1657   | 8.88E-07  | 0.85 |
| 29699 | 2258   | 2536   | 3.12E-05  | 0.85 |
| 29699 | 18659  | 18930  | 3.58E-04  | 0.81 |
| 29699 | 36866  | 37208  | 1.09E-12  | 0.85 |
| 29699 | 40704  | 41051  | 1.30E-07  | 0.9  |
| 29699 | 49656  | 50557  | 8.78E-20  | 0.81 |
| 29699 | 71138  | 71383  | 4.25E-07  | 0.82 |
| 29699 | 74526  | 74803  | 4.91E-08  | 0.84 |
| 29700 | 19909  | 20161  | 7.71E-14  | 0.94 |
| 29700 | 45465  | 46961  | 5.97E-141 | 0.68 |
| 29700 | 51128  | 51676  | 1.19E-36  | 0.95 |
| 29700 | 51937  | 52548  | 2.35E-31  | 0.93 |
| 29700 | 53393  | 53661  | 3.92E-25  | 0.94 |
| 29700 | 55744  | 57458  | 5.24E-35  | 0.61 |
| 29700 | 59986  | 60771  | 2.08E-23  | 0.79 |
| 29700 | 64686  | 65434  | 1.24E-17  | 0.82 |
| 29700 | 71216  | 71709  | 6.69E-42  | 0.94 |
| 29700 | 99914  | 100326 | 8.20E-55  | 0.97 |
| 29700 | 101435 | 102240 | 4.33E-49  | 0.95 |
| 29700 | 166212 | 166695 | 6.67E-58  | 0.96 |
| 29700 | 167876 | 168150 | 2.33E-24  | 0.95 |
| 29700 | 211194 | 211928 | 1.16E-55  | 0.89 |
| 29700 | 214944 | 215376 | 8.14E-45  | 0.98 |
| 29700 | 296693 | 297445 | 1.54E-23  | 0.64 |
| 29700 | 372618 | 372875 | 1.06E-16  | 0.95 |
| 29700 | 428910 | 429380 | 6.17E-35  | 0.93 |
| 29700 | 468839 | 469441 | 8.63E-54  | 0.97 |
| 29700 | 469725 | 470223 | 3.77E-39  | 0.84 |
| 29700 | 494281 | 495132 | 2.28E-46  | 0.92 |
| 29700 | 499051 | 499304 | 6.00E-29  | 0.88 |
| 29700 | 505668 | 505884 | 2.40E-16  | 0.88 |
| 29700 | 506963 | 507743 | 2.83E-51  | 0.82 |
| 29700 | 521803 | 522253 | 1.22E-49  | 0.94 |
| 29700 | 523393 | 523914 | 2.95E-37  | 0.94 |
| 29700 | 524416 | 524683 | 1.99E-29  | 0.93 |
| 29700 | 524954 | 525716 | 1.18E-92  | 0.97 |
| 29700 | 533936 | 534715 | 1.46E-56  | 0.96 |
| 29700 | 537429 | 537631 | 1.59E-27  | 0.87 |
| 29700 | 537840 | 538169 | 1.27E-18  | 0.91 |
| 29700 | 547410 | 549006 | 1.43E-66  | 0.93 |
| 29700 | 550690 | 551543 | 2.37E-106 | 0.96 |
| 29700 | 552065 | 552983 | 3.00E-80  | 0.93 |
| 29700 | 553231 | 553678 | 8.95E-43  | 0.96 |



|       |        |        |           |      |
|-------|--------|--------|-----------|------|
| 29700 | 555075 | 555917 | 1.01E-63  | 0.74 |
| 29700 | 580558 | 580773 | 5.82E-05  | 0.84 |
| 29700 | 602594 | 603078 | 5.56E-16  | 0.86 |
| 29700 | 605316 | 607177 | 8.94E-143 | 0.82 |
| 29700 | 607500 | 608532 | 9.41E-109 | 0.91 |
| 29700 | 611989 | 612270 | 2.67E-45  | 0.91 |
| 29700 | 612654 | 612955 | 1.63E-23  | 0.74 |
| 29700 | 613255 | 613955 | 1.06E-33  | 0.91 |
| 29700 | 614194 | 614496 | 5.00E-27  | 0.84 |
| 29700 | 615421 | 616204 | 7.89E-50  | 0.92 |
| 29700 | 649767 | 650120 | 1.29E-31  | 0.93 |
| 29700 | 652435 | 653486 | 1.42E-35  | 0.79 |
| 29700 | 653800 | 654670 | 8.27E-37  | 0.87 |
| 29700 | 655786 | 656336 | 6.29E-23  | 0.83 |
| 29700 | 657081 | 658536 | 4.95E-50  | 0.73 |
| 29701 | 4342   | 4730   | 1.50E-12  | 0.7  |
| 29701 | 26073  | 26711  | 2.27E-41  | 0.97 |
| 29701 | 35541  | 36493  | 1.24E-54  | 0.85 |
| 29701 | 39875  | 40409  | 7.69E-44  | 0.92 |
| 29701 | 40800  | 41690  | 4.86E-39  | 0.84 |
| 29701 | 55003  | 56061  | 1.19E-48  | 0.89 |
| 29701 | 96177  | 96893  | 1.96E-54  | 0.83 |
| 29701 | 123319 | 123745 | 3.52E-26  | 0.79 |
| 29701 | 138045 | 138597 | 1.11E-20  | 0.79 |
| 29701 | 146176 | 146444 | 8.89E-26  | 0.9  |
| 29701 | 148372 | 148932 | 2.86E-56  | 0.93 |
| 29701 | 155479 | 156295 | 5.25E-68  | 0.87 |
| 29701 | 156503 | 157142 | 1.26E-44  | 0.83 |
| 29701 | 168898 | 169926 | 2.47E-32  | 0.9  |
| 29701 | 174697 | 175741 | 1.53E-64  | 0.82 |
| 29701 | 177570 | 178449 | 2.93E-85  | 0.89 |
| 29701 | 180998 | 181325 | 1.15E-14  | 0.67 |
| 29701 | 186722 | 187216 | 8.87E-15  | 0.83 |
| 29701 | 188072 | 188441 | 8.59E-24  | 0.87 |
| 29701 | 200279 | 201368 | 3.19E-42  | 0.67 |
| 29701 | 242875 | 243287 | 2.64E-22  | 0.89 |
| 29702 | 4366   | 4772   | 3.14E-46  | 0.94 |
| 29702 | 15355  | 15680  | 5.58E-24  | 0.95 |
| 29702 | 22340  | 22578  | 4.84E-14  | 0.93 |
| 29702 | 37291  | 37944  | 3.72E-85  | 0.93 |
| 29702 | 60220  | 60699  | 3.56E-45  | 0.93 |
| 29702 | 101068 | 101579 | 1.17E-16  | 0.88 |
| 29702 | 122278 | 123042 | 8.34E-73  | 0.93 |
| 29702 | 123353 | 123804 | 1.52E-18  | 0.93 |
| 29703 | 20751  | 21176  | 2.79E-19  | 0.8  |
| 29703 | 48084  | 48328  | 1.32E-17  | 0.78 |
| 29703 | 48529  | 49436  | 1.74E-35  | 0.74 |
| 29703 | 62566  | 63275  | 9.82E-48  | 0.93 |
| 29703 | 63703  | 63919  | 1.27E-17  | 0.86 |
| 29703 | 64922  | 65634  | 2.23E-17  | 0.73 |
| 29703 | 65885  | 66397  | 7.03E-21  | 0.84 |
| 29703 | 73571  | 74085  | 1.44E-19  | 0.8  |
| 29703 | 81365  | 81950  | 2.27E-47  | 0.86 |

|       |        |        |           |      |
|-------|--------|--------|-----------|------|
| 29703 | 124336 | 124758 | 8.14E-31  | 0.76 |
| 29703 | 190544 | 190910 | 6.38E-32  | 0.71 |
| 29703 | 191482 | 191954 | 1.47E-08  | 0.8  |
| 29703 | 192556 | 193559 | 1.52E-62  | 0.81 |
| 29703 | 213603 | 213835 | 1.62E-27  | 0.82 |
| 29703 | 214058 | 214693 | 1.60E-35  | 0.81 |
| 29703 | 215727 | 217429 | 1.16E-103 | 0.89 |
| 29703 | 230551 | 231081 | 2.47E-35  | 0.6  |
| 29703 | 250076 | 250333 | 7.01E-07  | 0.87 |
| 29703 | 252599 | 253211 | 1.64E-28  | 0.88 |
| 29703 | 254030 | 254781 | 2.35E-37  | 0.8  |
| 29703 | 346382 | 346959 | 9.26E-64  | 0.66 |
| 29703 | 353189 | 353849 | 2.41E-21  | 0.83 |
| 29703 | 357954 | 358526 | 5.43E-35  | 0.89 |
| 29703 | 360442 | 360744 | 3.70E-15  | 0.83 |
| 29703 | 363985 | 364622 | 1.38E-16  | 0.83 |
| 29703 | 368425 | 369384 | 5.05E-24  | 0.62 |
| 29703 | 463017 | 464225 | 3.08E-30  | 0.69 |
| 29704 | 5308   | 5724   | 8.65E-06  | 0.97 |
| 29704 | 10192  | 10651  | 7.20E-08  | 0.79 |
| 29704 | 21795  | 22621  | 2.13E-08  | 0.9  |
| 29704 | 84704  | 84939  | 1.16E-04  | 0.91 |
| 29704 | 89778  | 90023  | 1.22E-08  | 1    |
| 29704 | 123668 | 123982 | 4.70E-05  | 0.84 |
| 29704 | 123746 | 124134 | 2.89E-05  | 0.82 |
| 29704 | 175804 | 176360 | 8.86E-08  | 0.86 |
| 29704 | 183269 | 183507 | 5.74E-05  | 0.86 |
| 29704 | 184306 | 184806 | 3.37E-09  | 0.98 |
| 29704 | 215474 | 215784 | 4.47E-07  | 0.87 |
| 29704 | 223348 | 223894 | 2.14E-07  | 0.96 |
| 29705 | 28958  | 29195  | 3.38E-17  | 0.83 |
| 29705 | 35462  | 35936  | 1.49E-15  | 0.83 |
| 29705 | 38440  | 38648  | 1.99E-21  | 0.86 |
| 29705 | 39712  | 40049  | 6.52E-41  | 0.95 |
| 29705 | 43332  | 44159  | 1.60E-35  | 0.93 |
| 29705 | 44513  | 44843  | 1.18E-41  | 0.91 |
| 29705 | 45637  | 45926  | 1.04E-07  | 0.85 |
| 29705 | 62026  | 62548  | 4.65E-23  | 0.92 |
| 29705 | 66384  | 66843  | 8.31E-13  | 0.94 |
| 29705 | 153734 | 154909 | 8.76E-78  | 0.95 |
| 29705 | 181746 | 182389 | 4.44E-07  | 0.72 |
| 29705 | 197816 | 198208 | 1.13E-29  | 0.95 |
| 29705 | 223391 | 223922 | 2.86E-08  | 0.77 |
| 29705 | 228070 | 228992 | 6.76E-22  | 0.96 |
| 29705 | 233522 | 234084 | 1.38E-15  | 0.97 |
| 29705 | 247854 | 248461 | 1.87E-55  | 0.88 |
| 29705 | 274927 | 275595 | 1.19E-21  | 0.8  |
| 29705 | 278951 | 280761 | 2.71E-104 | 0.87 |
| 29705 | 294583 | 296014 | 9.28E-84  | 0.92 |
| 29705 | 344372 | 344668 | 5.30E-15  | 0.83 |
| 29705 | 347257 | 347663 | 5.94E-20  | 0.85 |
| 29705 | 347957 | 348429 | 2.20E-16  | 0.83 |
| 29705 | 428262 | 428665 | 6.69E-15  | 0.82 |

|       |        |        |           |      |
|-------|--------|--------|-----------|------|
| 29705 | 454589 | 454891 | 2.32E-07  | 0.87 |
| 29705 | 488187 | 488600 | 4.64E-37  | 0.85 |
| 29705 | 490588 | 490907 | 3.80E-29  | 0.95 |
| 29705 | 501156 | 501666 | 2.30E-12  | 0.83 |
| 29705 | 515724 | 516132 | 6.92E-07  | 0.67 |
| 29705 | 546032 | 546532 | 1.99E-15  | 0.74 |
| 29705 | 551771 | 552284 | 9.93E-31  | 0.79 |
| 29705 | 558187 | 558812 | 2.06E-47  | 0.75 |
| 29706 | 89     | 322    | 2.44E-17  | 0.78 |
| 29706 | 59926  | 60149  | 3.73E-08  | 0.78 |
| 29706 | 76018  | 76493  | 1.85E-39  | 0.84 |
| 29706 | 77128  | 78204  | 6.00E-69  | 0.61 |
| 29706 | 81081  | 81690  | 5.10E-11  | 0.6  |
| 29706 | 88631  | 88848  | 2.19E-12  | 0.82 |
| 29706 | 157611 | 157971 | 8.57E-15  | 0.87 |
| 29706 | 194796 | 195773 | 3.88E-28  | 0.8  |
| 29706 | 194896 | 195782 | 9.25E-29  | 0.81 |
| 29706 | 201084 | 203162 | 3.54E-133 | 0.85 |
| 29706 | 217973 | 218928 | 2.62E-33  | 0.87 |
| 29706 | 223724 | 224001 | 3.23E-18  | 0.94 |
| 29706 | 224745 | 225110 | 4.10E-16  | 0.86 |
| 29706 | 233490 | 234277 | 2.74E-25  | 0.81 |
| 29706 | 238653 | 240213 | 4.09E-62  | 0.69 |
| 29706 | 248163 | 248527 | 4.09E-10  | 0.62 |
| 29706 | 255930 | 256407 | 7.06E-08  | 0.6  |
| 29706 | 261958 | 262215 | 2.11E-14  | 0.66 |
| 29706 | 268605 | 268893 | 4.00E-18  | 0.93 |
| 29706 | 271175 | 271688 | 2.93E-23  | 0.95 |
| 29706 | 271929 | 272399 | 7.37E-28  | 0.86 |
| 29706 | 285170 | 285753 | 1.00E-43  | 0.77 |
| 29706 | 286110 | 286553 | 2.93E-14  | 0.77 |
| 29706 | 288298 | 288730 | 1.86E-27  | 0.63 |
| 29706 | 308233 | 308435 | 5.42E-42  | 0.89 |
| 29706 | 308667 | 309166 | 1.14E-84  | 0.84 |
| 29706 | 309437 | 309995 | 5.89E-64  | 0.84 |
| 29706 | 310256 | 311124 | 5.74E-46  | 0.66 |
| 29706 | 312267 | 312489 | 6.63E-08  | 0.77 |
| 29706 | 321663 | 322306 | 3.47E-27  | 0.8  |
| 29706 | 326219 | 326763 | 5.66E-39  | 0.94 |
| 29706 | 329910 | 330325 | 2.65E-15  | 0.67 |
| 29706 | 386639 | 387284 | 2.20E-27  | 0.67 |
| 29706 | 408569 | 408818 | 2.40E-10  | 0.83 |
| 29706 | 424615 | 425957 | 1.81E-43  | 0.84 |
| 29706 | 427421 | 427733 | 4.77E-37  | 0.94 |
| 29706 | 430331 | 430838 | 3.73E-51  | 0.94 |
| 29706 | 439096 | 439858 | 2.14E-43  | 0.86 |
| 29706 | 442670 | 442944 | 5.54E-45  | 0.93 |
| 29706 | 443560 | 444576 | 1.06E-71  | 0.87 |
| 29706 | 448621 | 449767 | 1.15E-68  | 0.9  |
| 29706 | 450051 | 451347 | 1.09E-100 | 0.87 |
| 29706 | 451638 | 452907 | 5.42E-81  | 0.89 |
| 29706 | 455325 | 457851 | 6.91E-81  | 0.75 |
| 29706 | 483185 | 484238 | 2.30E-71  | 0.63 |

|       |        |        |           |      |
|-------|--------|--------|-----------|------|
| 29706 | 485127 | 487114 | 5.84E-76  | 0.77 |
| 29706 | 512830 | 513169 | 4.13E-30  | 0.92 |
| 29706 | 513403 | 514142 | 8.90E-55  | 0.9  |
| 29706 | 515652 | 516835 | 8.86E-39  | 0.64 |
| 29706 | 525365 | 527409 | 5.57E-70  | 0.8  |
| 29706 | 536384 | 537392 | 2.11E-36  | 0.73 |
| 29706 | 538880 | 539536 | 2.84E-27  | 0.89 |
| 29706 | 554900 | 555197 | 1.03E-19  | 0.9  |
| 29706 | 576840 | 578287 | 1.16E-52  | 0.8  |
| 29706 | 578946 | 579364 | 1.29E-86  | 0.66 |
| 29706 | 582473 | 582817 | 3.24E-17  | 0.88 |
| 29706 | 609234 | 609480 | 5.43E-11  | 0.86 |
| 29706 | 623509 | 623812 | 1.85E-12  | 0.89 |
| 29706 | 632646 | 633153 | 6.99E-49  | 0.92 |
| 29706 | 636513 | 636907 | 1.87E-42  | 0.91 |
| 29706 | 638624 | 639385 | 4.53E-37  | 0.84 |
| 29706 | 644335 | 645701 | 7.81E-78  | 0.69 |
| 29706 | 659347 | 660047 | 1.13E-14  | 0.78 |
| 29706 | 667081 | 667465 | 9.71E-20  | 0.78 |
| 29706 | 675219 | 675501 | 5.10E-08  | 0.85 |
| 29706 | 680528 | 680753 | 2.04E-21  | 0.87 |
| 29707 | 542    | 1075   | 3.36E-40  | 0.88 |
| 29707 | 10020  | 10526  | 1.75E-13  | 0.91 |
| 29707 | 31090  | 31949  | 9.83E-44  | 0.83 |
| 29707 | 38809  | 39070  | 5.89E-10  | 0.78 |
| 29707 | 60248  | 60901  | 2.94E-19  | 0.83 |
| 29707 | 61186  | 61710  | 1.59E-24  | 0.79 |
| 29707 | 62155  | 63067  | 9.34E-54  | 0.87 |
| 29707 | 63291  | 63845  | 1.86E-35  | 0.88 |
| 29707 | 68394  | 69854  | 2.36E-45  | 0.85 |
| 29707 | 74558  | 75198  | 3.63E-22  | 0.9  |
| 29707 | 76995  | 77368  | 2.53E-21  | 0.92 |
| 29708 | 5408   | 6602   | 2.25E-81  | 0.77 |
| 29708 | 27727  | 28077  | 6.31E-26  | 0.88 |
| 29708 | 75983  | 76493  | 8.18E-38  | 0.89 |
| 29708 | 110862 | 111084 | 1.46E-30  | 0.96 |
| 29708 | 112267 | 114824 | 9.26E-240 | 0.95 |
| 29708 | 117500 | 118442 | 1.60E-38  | 0.82 |
| 29708 | 119589 | 119909 | 5.33E-28  | 0.9  |
| 29708 | 147842 | 148565 | 2.91E-34  | 0.61 |
| 29708 | 180282 | 180759 | 5.07E-12  | 0.9  |
| 29709 | 4643   | 6777   | 2.75E-93  | 0.62 |
| 29709 | 7006   | 7334   | 1.00E-42  | 0.79 |
| 29709 | 27378  | 27968  | 4.94E-19  | 0.8  |
| 29709 | 28668  | 28916  | 3.25E-12  | 0.86 |
| 29709 | 29166  | 29594  | 1.05E-34  | 0.87 |
| 29709 | 87453  | 87671  | 6.21E-13  | 0.72 |
| 29709 | 88414  | 89774  | 3.68E-114 | 0.87 |
| 29709 | 90361  | 90829  | 1.88E-26  | 0.79 |
| 29709 | 91049  | 91267  | 8.94E-19  | 0.66 |
| 29709 | 93235  | 93568  | 1.03E-26  | 0.96 |
| 29709 | 112698 | 113163 | 4.64E-25  | 0.81 |
| 29709 | 119194 | 119430 | 1.81E-11  | 0.74 |

|       |        |        |           |      |
|-------|--------|--------|-----------|------|
| 29709 | 133017 | 135261 | 1.19E-171 | 0.9  |
| 29709 | 135834 | 137218 | 1.36E-87  | 0.85 |
| 29709 | 145579 | 146469 | 1.27E-67  | 0.92 |
| 29709 | 155622 | 156270 | 2.43E-22  | 0.81 |
| 29709 | 155709 | 156327 | 2.59E-23  | 0.83 |
| 29709 | 159199 | 160856 | 1.82E-91  | 0.73 |
| 29709 | 183153 | 185401 | 2.88E-93  | 0.67 |
| 29709 | 194317 | 194927 | 1.18E-65  | 0.94 |
| 29709 | 210590 | 212605 | 3.79E-58  | 0.77 |
| 29709 | 244831 | 245155 | 1.13E-16  | 0.79 |
| 29709 | 265349 | 266271 | 2.33E-36  | 0.75 |
| 29709 | 269893 | 272379 | 1.14E-76  | 0.75 |
| 29709 | 274965 | 276105 | 9.69E-41  | 0.69 |
| 29709 | 301537 | 301816 | 1.70E-18  | 0.75 |
| 29709 | 302734 | 303977 | 2.65E-75  | 0.78 |
| 29709 | 316764 | 317893 | 9.12E-64  | 0.68 |
| 29709 | 318791 | 319201 | 6.45E-40  | 0.81 |
| 29709 | 319889 | 320511 | 2.37E-86  | 0.89 |
| 29709 | 321465 | 322676 | 9.54E-59  | 0.9  |
| 29709 | 338381 | 339560 | 4.54E-62  | 0.83 |
| 29709 | 349888 | 350918 | 1.04E-63  | 0.9  |
| 29709 | 354585 | 355068 | 1.37E-20  | 0.88 |
| 29711 | 17858  | 18208  | 1.25E-14  | 0.81 |
| 29711 | 27249  | 27893  | 7.78E-15  | 0.83 |
| 29711 | 38451  | 38690  | 4.43E-12  | 0.83 |
| 29711 | 75424  | 75634  | 1.20E-19  | 0.7  |
| 29711 | 79514  | 80196  | 1.68E-61  | 0.91 |
| 29711 | 80484  | 81833  | 8.05E-77  | 0.95 |
| 29711 | 86747  | 87450  | 2.47E-41  | 0.96 |
| 29711 | 91398  | 91940  | 2.02E-14  | 0.71 |
| 29711 | 117698 | 118619 | 6.11E-19  | 0.7  |
| 29711 | 140010 | 141536 | 7.85E-97  | 0.9  |
| 29711 | 141940 | 143021 | 1.39E-54  | 0.9  |
| 29711 | 143371 | 145587 | 8.64E-104 | 0.81 |
| 29711 | 162432 | 162699 | 4.21E-07  | 0.68 |
| 29711 | 181558 | 182530 | 8.66E-82  | 0.93 |
| 29711 | 200419 | 201440 | 1.39E-72  | 0.92 |
| 29711 | 201752 | 202229 | 3.98E-23  | 0.87 |
| 29711 | 227645 | 228166 | 4.66E-87  | 0.93 |
| 29712 | 49554  | 50354  | 2.65E-36  | 0.8  |
| 29712 | 55178  | 55844  | 1.28E-52  | 0.79 |
| 29712 | 70204  | 70585  | 1.29E-56  | 0.92 |
| 29713 | 6908   | 7147   | 1.15E-24  | 0.94 |
| 29713 | 25390  | 27139  | 6.70E-69  | 0.71 |
| 29713 | 73733  | 74809  | 2.19E-28  | 0.84 |
| 29713 | 76837  | 77271  | 1.47E-10  | 0.63 |
| 29716 | 5906   | 6471   | 7.53E-36  | 0.94 |
| 29716 | 8734   | 10873  | 1.09E-87  | 0.94 |
| 29716 | 11114  | 11384  | 5.76E-19  | 0.96 |
| 29716 | 12229  | 12746  | 7.24E-54  | 0.95 |
| 29716 | 12980  | 13893  | 1.45E-54  | 0.93 |
| 29716 | 16406  | 16923  | 4.96E-29  | 0.98 |
| 29716 | 34932  | 35529  | 2.12E-11  | 0.81 |

|       |        |        |           |      |
|-------|--------|--------|-----------|------|
| 29716 | 40893  | 41164  | 7.95E-05  | 0.84 |
| 29716 | 62950  | 63341  | 2.53E-22  | 0.84 |
| 29716 | 87310  | 87621  | 6.88E-12  | 0.87 |
| 29716 | 95393  | 96319  | 9.91E-32  | 0.64 |
| 29716 | 97528  | 99092  | 2.57E-124 | 0.84 |
| 29716 | 99387  | 99694  | 6.77E-84  | 0.9  |
| 29716 | 99951  | 100917 | 3.31E-120 | 0.95 |
| 29716 | 101167 | 101875 | 4.73E-27  | 0.89 |
| 29716 | 102177 | 103249 | 6.49E-68  | 0.9  |
| 29716 | 104225 | 104918 | 5.98E-51  | 0.97 |
| 29716 | 105469 | 105838 | 1.27E-27  | 0.77 |
| 29716 | 112187 | 112420 | 4.76E-37  | 0.9  |
| 29716 | 115029 | 115518 | 2.90E-56  | 0.94 |
| 29716 | 116437 | 117951 | 3.82E-106 | 0.79 |
| 29716 | 168356 | 168589 | 1.29E-13  | 0.9  |
| 29717 | 15     | 1121   | 5.36E-34  | 0.86 |
| 29717 | 5010   | 5830   | 6.78E-51  | 0.89 |
| 29717 | 7773   | 8563   | 3.70E-52  | 0.87 |
| 29717 | 33431  | 33746  | 1.50E-20  | 0.79 |
| 29717 | 64294  | 65083  | 5.18E-41  | 0.78 |
| 29717 | 68552  | 69725  | 4.49E-78  | 0.86 |
| 29717 | 69969  | 70196  | 1.67E-21  | 0.82 |
| 29717 | 70722  | 71302  | 4.74E-40  | 0.94 |
| 29717 | 72383  | 72823  | 1.57E-16  | 0.72 |
| 29717 | 73964  | 74468  | 1.65E-22  | 0.91 |
| 29717 | 75082  | 75482  | 1.55E-28  | 0.9  |
| 29717 | 75689  | 76028  | 1.21E-37  | 0.95 |
| 29717 | 78812  | 79140  | 8.42E-07  | 0.75 |
| 29718 | 3927   | 4194   | 4.50E-18  | 0.93 |
| 29718 | 36623  | 37328  | 3.37E-07  | 0.71 |
| 29718 | 43183  | 44607  | 1.09E-86  | 0.86 |
| 29718 | 50723  | 53058  | 8.64E-94  | 0.89 |
| 29718 | 55710  | 56352  | 1.28E-09  | 0.85 |
| 29719 | 10369  | 10773  | 7.54E-51  | 0.94 |
| 29719 | 12145  | 12608  | 1.79E-25  | 0.98 |
| 29719 | 13033  | 13671  | 8.92E-43  | 0.89 |
| 29719 | 106504 | 106972 | 1.31E-21  | 0.91 |
| 29719 | 126856 | 127395 | 1.65E-15  | 0.91 |
| 29719 | 129744 | 130716 | 9.91E-27  | 0.76 |
| 29719 | 136828 | 137250 | 1.26E-12  | 0.79 |
| 29719 | 152377 | 152881 | 5.55E-17  | 0.84 |
| 29719 | 164313 | 165264 | 4.23E-36  | 0.8  |
| 29719 | 165932 | 166902 | 2.01E-20  | 0.79 |
| 29719 | 168053 | 168331 | 4.33E-26  | 0.92 |
| 29719 | 169592 | 170430 | 1.77E-20  | 0.81 |
| 29719 | 189896 | 190343 | 2.74E-20  | 0.79 |
| 29719 | 232193 | 232414 | 2.71E-05  | 0.79 |
| 29719 | 243944 | 244312 | 6.88E-11  | 0.75 |
| 29719 | 246102 | 246341 | 1.78E-08  | 0.78 |
| 29720 | 44801  | 45691  | 1.40E-93  | 0.94 |
| 29720 | 46614  | 47161  | 1.04E-16  | 0.65 |
| 29720 | 47579  | 47972  | 1.18E-22  | 0.64 |
| 29720 | 48520  | 48917  | 8.13E-32  | 0.79 |

|       |        |        |           |      |
|-------|--------|--------|-----------|------|
| 29721 | 8911   | 9413   | 1.00E-10  | 0.98 |
| 29721 | 123897 | 124448 | 9.00E-06  | 0.93 |
| 29721 | 143550 | 143966 | 5.45E-08  | 0.88 |
| 29721 | 154951 | 155640 | 1.63E-26  | 0.93 |
| 29721 | 174457 | 174915 | 1.77E-07  | 0.81 |
| 29721 | 181757 | 182172 | 7.24E-14  | 0.85 |
| 29721 | 219189 | 219754 | 1.36E-08  | 0.83 |
| 29721 | 273097 | 273372 | 5.23E-09  | 0.91 |
| 29721 | 310460 | 310833 | 8.58E-10  | 0.81 |
| 29721 | 325405 | 326175 | 9.64E-24  | 0.87 |
| 29721 | 355996 | 356345 | 7.14E-16  | 0.85 |
| 29722 | 317190 | 317405 | 3.05E-04  | 0.88 |
| 29722 | 335761 | 336114 | 8.37E-27  | 0.93 |
| 29724 | 154    | 411    | 4.47E-28  | 0.77 |
| 29724 | 21909  | 22229  | 3.15E-57  | 0.96 |
| 29724 | 22937  | 23770  | 2.53E-115 | 0.92 |
| 29724 | 36613  | 37932  | 4.71E-41  | 0.75 |
| 29724 | 52027  | 52904  | 8.01E-48  | 0.8  |
| 29724 | 61014  | 61459  | 1.58E-05  | 0.85 |
| 29724 | 83567  | 84037  | 6.69E-06  | 0.95 |
| 29724 | 95594  | 95821  | 4.18E-18  | 0.81 |
| 29724 | 138851 | 139576 | 1.30E-30  | 0.86 |
| 29724 | 150351 | 151165 | 2.68E-11  | 0.87 |
| 29724 | 151154 | 151377 | 1.11E-08  | 0.92 |
| 29724 | 180304 | 181048 | 1.17E-64  | 0.85 |
| 29724 | 181615 | 181959 | 1.62E-11  | 0.79 |
| 29724 | 192273 | 192867 | 3.64E-29  | 0.86 |
| 29724 | 194025 | 194337 | 9.23E-57  | 0.93 |
| 29724 | 226604 | 226823 | 8.75E-39  | 0.93 |
| 29724 | 286832 | 287057 | 7.75E-50  | 0.94 |
| 29724 | 353239 | 353799 | 4.62E-24  | 0.67 |
| 29724 | 354050 | 354896 | 8.36E-117 | 0.96 |
| 29724 | 409493 | 409793 | 5.88E-09  | 0.76 |
| 29724 | 419279 | 420020 | 1.29E-25  | 0.8  |
| 29724 | 421775 | 422255 | 1.81E-29  | 0.79 |
| 29724 | 422664 | 423091 | 3.88E-53  | 0.94 |
| 29724 | 423466 | 423732 | 3.11E-27  | 0.9  |
| 29724 | 424823 | 425168 | 6.07E-30  | 0.86 |
| 29724 | 425441 | 425916 | 8.75E-16  | 0.79 |
| 29724 | 427803 | 428161 | 1.68E-38  | 0.94 |
| 29724 | 428751 | 429067 | 6.62E-25  | 0.94 |
| 29724 | 448330 | 448694 | 2.91E-22  | 0.83 |
| 29724 | 450069 | 450497 | 1.27E-15  | 0.82 |
| 29724 | 465683 | 466146 | 1.65E-22  | 0.86 |
| 29724 | 477701 | 477940 | 1.74E-15  | 0.83 |
| 29724 | 479526 | 479975 | 4.39E-56  | 0.85 |
| 29724 | 501115 | 502405 | 8.57E-59  | 0.62 |
| 29724 | 503481 | 503764 | 5.22E-25  | 0.9  |
| 29724 | 526210 | 526491 | 1.16E-17  | 0.93 |
| 29724 | 540581 | 541429 | 3.53E-41  | 0.79 |
| 29724 | 564570 | 564968 | 6.29E-24  | 0.64 |
| 29724 | 570931 | 571321 | 1.05E-26  | 0.81 |
| 29724 | 590688 | 591054 | 8.37E-18  | 0.66 |

|       |        |        |           |      |
|-------|--------|--------|-----------|------|
| 29724 | 592690 | 592908 | 3.09E-24  | 0.85 |
| 29724 | 593198 | 594051 | 6.89E-56  | 0.96 |
| 29724 | 595504 | 596765 | 1.23E-34  | 0.82 |
| 29724 | 671057 | 671829 | 2.01E-70  | 0.95 |
| 29724 | 685182 | 685535 | 1.28E-11  | 0.78 |
| 29724 | 687961 | 689749 | 6.59E-121 | 0.83 |
| 29724 | 731072 | 731951 | 6.67E-48  | 0.89 |
| 29724 | 732184 | 732528 | 1.13E-14  | 0.76 |
| 29724 | 744102 | 744323 | 6.49E-16  | 0.91 |
| 29725 | 16664  | 17432  | 5.98E-51  | 0.74 |
| 29725 | 73209  | 73665  | 2.35E-16  | 0.78 |
| 29725 | 130272 | 130821 | 2.16E-07  | 0.88 |
| 29725 | 156688 | 156888 | 2.40E-04  | 0.86 |
| 29725 | 161687 | 162065 | 2.56E-20  | 0.75 |
| 29725 | 181654 | 182793 | 8.86E-45  | 0.87 |
| 29725 | 236599 | 236890 | 5.90E-09  | 0.9  |
| 29725 | 295350 | 295787 | 1.57E-75  | 0.98 |
| 29725 | 303055 | 303687 | 3.18E-22  | 0.82 |
| 29725 | 334701 | 334947 | 8.45E-11  | 0.81 |
| 29725 | 358270 | 358494 | 1.07E-05  | 0.9  |
| 29725 | 424309 | 424702 | 5.17E-13  | 0.91 |
| 29725 | 469912 | 470193 | 3.12E-09  | 0.93 |
| 29725 | 492990 | 493266 | 3.47E-07  | 0.86 |
| 29725 | 566776 | 567391 | 1.71E-09  | 0.9  |
| 29725 | 571193 | 571768 | 2.31E-14  | 0.92 |
| 29726 | 14427  | 14766  | 1.61E-26  | 0.82 |
| 29726 | 14992  | 16713  | 1.04E-95  | 0.71 |
| 29726 | 25444  | 25898  | 1.88E-16  | 0.79 |
| 29726 | 76152  | 76481  | 1.39E-08  | 0.83 |
| 29726 | 116844 | 117511 | 1.85E-62  | 0.84 |
| 29726 | 124025 | 124609 | 2.40E-31  | 0.88 |
| 29726 | 125061 | 125328 | 4.01E-07  | 0.96 |
| 29726 | 138030 | 138491 | 2.65E-17  | 0.66 |
| 29726 | 139618 | 140108 | 1.38E-21  | 0.81 |
| 29726 | 148732 | 150607 | 8.69E-121 | 0.81 |
| 29726 | 204700 | 205432 | 2.93E-23  | 0.78 |
| 29726 | 225848 | 226158 | 4.68E-29  | 0.8  |
| 29726 | 242759 | 243431 | 4.38E-89  | 0.82 |
| 29726 | 252230 | 252622 | 1.50E-23  | 0.69 |
| 29726 | 269228 | 271752 | 2.07E-114 | 0.78 |
| 29726 | 276221 | 276781 | 7.38E-16  | 0.68 |
| 29726 | 278945 | 279301 | 4.73E-17  | 0.64 |
| 29726 | 284665 | 285192 | 4.24E-37  | 0.87 |
| 29726 | 295159 | 296114 | 1.06E-59  | 0.93 |
| 29726 | 333362 | 333847 | 7.96E-36  | 0.9  |
| 29726 | 334089 | 334543 | 1.04E-24  | 0.79 |
| 29726 | 346633 | 348484 | 1.45E-60  | 0.75 |
| 29726 | 356779 | 357169 | 2.26E-18  | 0.9  |
| 29726 | 382067 | 382410 | 1.28E-57  | 0.89 |
| 29726 | 383076 | 383932 | 2.77E-49  | 0.69 |
| 29726 | 416592 | 418098 | 5.61E-67  | 0.8  |
| 29726 | 418388 | 418754 | 2.37E-38  | 0.72 |
| 29726 | 433661 | 434705 | 4.08E-40  | 0.82 |



|       |         |         |           |      |
|-------|---------|---------|-----------|------|
| 29726 | 447956  | 448220  | 2.18E-17  | 0.76 |
| 29726 | 458929  | 459405  | 8.72E-46  | 0.88 |
| 29726 | 459667  | 460218  | 1.07E-67  | 0.89 |
| 29726 | 486066  | 486267  | 3.93E-07  | 0.73 |
| 29726 | 487936  | 488559  | 2.35E-32  | 0.82 |
| 29726 | 497109  | 498253  | 3.14E-92  | 0.93 |
| 29726 | 498816  | 499109  | 1.91E-19  | 0.85 |
| 29726 | 517882  | 518218  | 6.99E-31  | 0.93 |
| 29726 | 522026  | 522599  | 4.16E-26  | 0.84 |
| 29726 | 523237  | 523613  | 5.30E-46  | 0.84 |
| 29726 | 523852  | 524690  | 3.98E-41  | 0.83 |
| 29726 | 527423  | 527696  | 2.75E-14  | 0.79 |
| 29726 | 532363  | 532946  | 5.88E-33  | 0.77 |
| 29726 | 534393  | 535466  | 5.42E-111 | 0.93 |
| 29726 | 535792  | 536032  | 2.82E-27  | 0.92 |
| 29726 | 543453  | 543914  | 7.92E-15  | 0.76 |
| 29726 | 576944  | 577307  | 4.91E-16  | 0.89 |
| 29726 | 593798  | 594059  | 1.12E-17  | 0.79 |
| 29726 | 599893  | 600545  | 1.95E-55  | 0.86 |
| 29726 | 642252  | 642863  | 1.05E-56  | 0.79 |
| 29726 | 661544  | 662364  | 2.64E-34  | 0.82 |
| 29726 | 665493  | 666547  | 1.39E-55  | 0.7  |
| 29726 | 702847  | 703822  | 2.96E-43  | 0.78 |
| 29726 | 705878  | 706328  | 2.21E-34  | 0.93 |
| 29726 | 728166  | 728460  | 2.10E-39  | 0.97 |
| 29726 | 750357  | 752685  | 4.37E-224 | 0.86 |
| 29726 | 753405  | 753693  | 1.78E-31  | 0.87 |
| 29726 | 754107  | 754511  | 4.41E-65  | 0.92 |
| 29726 | 783259  | 783840  | 1.07E-34  | 0.76 |
| 29726 | 784475  | 784721  | 1.37E-30  | 0.93 |
| 29726 | 784932  | 785392  | 9.28E-27  | 0.87 |
| 29726 | 786192  | 787231  | 5.72E-36  | 0.81 |
| 29726 | 787559  | 788345  | 1.34E-39  | 0.81 |
| 29726 | 855537  | 857301  | 1.79E-67  | 0.71 |
| 29726 | 884032  | 884606  | 1.09E-19  | 0.78 |
| 29726 | 889205  | 889575  | 9.83E-16  | 0.6  |
| 29726 | 891956  | 892409  | 1.35E-30  | 0.83 |
| 29726 | 906022  | 906955  | 2.51E-55  | 0.81 |
| 29726 | 910547  | 911532  | 2.55E-72  | 0.88 |
| 29726 | 911819  | 912724  | 7.63E-37  | 0.8  |
| 29726 | 917999  | 918542  | 9.89E-20  | 0.8  |
| 29726 | 918002  | 918614  | 3.23E-19  | 0.76 |
| 29726 | 922844  | 923327  | 1.34E-27  | 0.82 |
| 29726 | 923635  | 924115  | 2.96E-25  | 0.79 |
| 29726 | 927138  | 927992  | 4.23E-29  | 0.86 |
| 29726 | 935120  | 935830  | 1.45E-69  | 0.93 |
| 29726 | 942782  | 945766  | 1.81E-244 | 0.79 |
| 29726 | 950930  | 952742  | 4.96E-75  | 0.67 |
| 29726 | 978110  | 978540  | 1.40E-22  | 0.62 |
| 29726 | 1017108 | 1018705 | 4.10E-91  | 0.88 |
| 29726 | 1018913 | 1019199 | 2.44E-14  | 0.96 |
| 29726 | 1047234 | 1047457 | 8.13E-34  | 0.92 |
| 29726 | 1060668 | 1061238 | 1.79E-43  | 0.85 |

|       |         |         |           |      |
|-------|---------|---------|-----------|------|
| 29726 | 1061710 | 1062926 | 1.16E-47  | 0.82 |
| 29726 | 1091490 | 1092374 | 4.83E-29  | 0.62 |
| 29726 | 1099021 | 1100833 | 4.64E-104 | 0.85 |
| 29726 | 1109935 | 1110461 | 5.56E-18  | 0.74 |
| 29726 | 1111750 | 1112811 | 7.74E-34  | 0.7  |
| 29726 | 1123840 | 1124827 | 5.94E-37  | 0.72 |
| 29726 | 1186781 | 1187205 | 2.91E-45  | 0.94 |
| 29726 | 1192528 | 1192840 | 3.30E-45  | 0.72 |
| 29726 | 1206960 | 1207289 | 2.84E-21  | 0.84 |
| 29726 | 1216002 | 1216425 | 1.45E-32  | 0.79 |
| 29726 | 1216705 | 1217061 | 3.18E-07  | 0.76 |
| 29726 | 1228502 | 1229270 | 9.67E-29  | 0.85 |
| 29727 | 5640    | 5842    | 3.89E-21  | 0.92 |
| 29727 | 24096   | 24453   | 3.54E-23  | 0.68 |
| 29727 | 43041   | 43507   | 1.20E-11  | 0.81 |
| 29727 | 110806  | 111987  | 9.18E-86  | 0.87 |
| 29727 | 113121  | 113438  | 1.48E-24  | 0.86 |
| 29727 | 120387  | 120850  | 5.39E-61  | 0.72 |
| 29727 | 121118  | 121415  | 1.21E-12  | 0.6  |
| 29727 | 141046  | 141257  | 9.95E-21  | 0.79 |
| 29727 | 141491  | 141712  | 6.06E-36  | 0.91 |
| 29727 | 149765  | 150378  | 1.29E-26  | 0.9  |
| 29727 | 150656  | 151055  | 3.66E-25  | 0.78 |
| 29727 | 159648  | 160427  | 2.73E-38  | 0.87 |
| 29727 | 170822  | 173247  | 9.26E-239 | 0.7  |
| 29727 | 201155  | 201589  | 1.59E-23  | 0.91 |
| 29727 | 202014  | 202599  | 3.33E-29  | 0.86 |
| 29727 | 203186  | 204063  | 1.99E-68  | 0.83 |
| 29727 | 204686  | 205112  | 1.58E-25  | 0.74 |
| 29727 | 213631  | 214141  | 1.35E-25  | 0.85 |
| 29727 | 214594  | 214960  | 2.71E-34  | 0.92 |
| 29727 | 215942  | 216366  | 1.91E-14  | 0.83 |
| 29727 | 217490  | 217863  | 2.15E-17  | 0.79 |
| 29727 | 217554  | 217873  | 5.44E-18  | 0.79 |
| 29727 | 219278  | 219547  | 8.97E-16  | 0.9  |
| 29728 | 15767   | 17500   | 3.67E-68  | 0.82 |
| 29728 | 20492   | 20736   | 1.20E-50  | 0.83 |
| 29728 | 20948   | 21174   | 9.04E-48  | 0.93 |
| 29728 | 26450   | 26742   | 1.73E-28  | 0.79 |
| 29728 | 38806   | 40493   | 1.78E-170 | 0.75 |
| 29728 | 41177   | 41452   | 6.74E-16  | 0.67 |
| 29728 | 42270   | 43893   | 3.03E-146 | 0.73 |
| 29728 | 55055   | 55423   | 2.19E-10  | 0.82 |
| 29728 | 61659   | 62070   | 2.94E-28  | 0.84 |
| 29728 | 91402   | 91969   | 5.76E-50  | 0.96 |
| 29728 | 98569   | 99328   | 1.03E-20  | 0.8  |
| 29728 | 108155  | 108487  | 2.34E-20  | 0.71 |
| 29728 | 128365  | 129001  | 1.00E-17  | 0.76 |
| 29728 | 152181  | 152491  | 9.02E-30  | 0.82 |
| 29728 | 154346  | 154604  | 2.31E-18  | 0.74 |
| 29728 | 159756  | 161190  | 2.94E-70  | 0.89 |
| 29728 | 163225  | 164669  | 4.03E-52  | 0.76 |
| 29728 | 171506  | 171934  | 2.80E-10  | 0.81 |

|       |        |        |           |      |
|-------|--------|--------|-----------|------|
| 29728 | 176160 | 176696 | 2.71E-12  | 0.6  |
| 29728 | 178183 | 178708 | 5.71E-32  | 0.75 |
| 29728 | 180343 | 180772 | 2.55E-22  | 0.86 |
| 29728 | 185856 | 186176 | 5.02E-36  | 0.91 |
| 29728 | 187942 | 188299 | 2.83E-35  | 0.82 |
| 29728 | 188537 | 188739 | 1.10E-47  | 0.93 |
| 29728 | 236777 | 237610 | 2.90E-36  | 0.75 |
| 29728 | 248958 | 250487 | 1.34E-41  | 0.83 |
| 29728 | 258933 | 259308 | 5.89E-14  | 0.78 |
| 29728 | 268255 | 268986 | 1.48E-50  | 0.69 |
| 29728 | 278543 | 278752 | 1.13E-07  | 0.84 |
| 29728 | 285223 | 285570 | 1.11E-16  | 0.95 |
| 29728 | 288077 | 289092 | 4.41E-48  | 0.83 |
| 29728 | 293002 | 293586 | 7.18E-12  | 0.78 |
| 29728 | 323660 | 324174 | 6.13E-06  | 0.69 |
| 29728 | 325783 | 326411 | 8.36E-22  | 0.8  |
| 29728 | 330789 | 331228 | 5.33E-17  | 0.74 |
| 29728 | 331432 | 331924 | 2.61E-11  | 0.76 |
| 29728 | 334111 | 334598 | 4.62E-08  | 0.79 |
| 29729 | 23519  | 23827  | 2.30E-22  | 0.76 |
| 29729 | 24073  | 25526  | 4.33E-75  | 0.79 |
| 29729 | 25967  | 26183  | 4.10E-44  | 0.9  |
| 29729 | 34569  | 35109  | 6.62E-28  | 0.74 |
| 29729 | 37231  | 37482  | 9.87E-33  | 0.9  |
| 29729 | 48908  | 49308  | 4.07E-11  | 0.7  |
| 29729 | 67844  | 68722  | 9.75E-43  | 0.88 |
| 29729 | 69320  | 69866  | 8.07E-47  | 0.9  |
| 29729 | 100233 | 100921 | 3.39E-20  | 0.8  |
| 29729 | 115511 | 116071 | 4.27E-30  | 0.91 |
| 29729 | 135756 | 136139 | 6.31E-22  | 0.9  |
| 29729 | 138839 | 139896 | 6.53E-48  | 0.85 |
| 29729 | 140416 | 141026 | 1.68E-23  | 0.77 |
| 29729 | 141250 | 141996 | 6.67E-58  | 0.85 |
| 29729 | 142353 | 142621 | 2.44E-14  | 0.79 |
| 29729 | 200357 | 200762 | 2.51E-13  | 0.78 |
| 29729 | 201797 | 202159 | 2.47E-12  | 0.79 |
| 29729 | 204702 | 204989 | 2.15E-15  | 0.64 |
| 29729 | 205817 | 206291 | 2.29E-15  | 0.82 |
| 29729 | 206600 | 207208 | 5.21E-47  | 0.95 |
| 29729 | 210875 | 211200 | 2.62E-06  | 0.81 |
| 29729 | 214915 | 215301 | 1.16E-23  | 0.85 |
| 29729 | 217199 | 217738 | 1.94E-52  | 0.88 |
| 29729 | 222808 | 223784 | 3.71E-202 | 0.72 |
| 29729 | 223993 | 224584 | 7.13E-94  | 0.88 |
| 29729 | 233866 | 234749 | 3.06E-22  | 0.86 |
| 29729 | 293094 | 293349 | 2.87E-15  | 0.77 |
| 29729 | 294621 | 295262 | 2.58E-40  | 0.93 |
| 29729 | 305908 | 306220 | 6.17E-16  | 0.74 |
| 29729 | 331677 | 332761 | 3.88E-42  | 0.78 |
| 29729 | 339219 | 340022 | 7.61E-50  | 0.81 |
| 29729 | 396795 | 397803 | 1.04E-54  | 0.79 |
| 29729 | 400537 | 401007 | 1.33E-21  | 0.73 |
| 29729 | 401211 | 401565 | 4.68E-23  | 0.82 |

|       |        |        |           |      |
|-------|--------|--------|-----------|------|
| 29729 | 408072 | 408437 | 8.60E-21  | 0.79 |
| 29729 | 411795 | 413084 | 1.66E-85  | 0.91 |
| 29729 | 414176 | 414505 | 1.15E-13  | 0.71 |
| 29729 | 438626 | 439227 | 2.83E-23  | 0.7  |
| 29729 | 476357 | 476583 | 1.46E-33  | 0.84 |
| 29729 | 477093 | 479171 | 3.65E-136 | 0.74 |
| 29729 | 483311 | 484089 | 7.85E-46  | 0.92 |
| 29729 | 484401 | 484717 | 4.53E-20  | 0.88 |
| 29729 | 484956 | 486127 | 1.40E-32  | 0.76 |
| 29729 | 487853 | 488230 | 1.53E-40  | 0.86 |
| 29729 | 514777 | 515473 | 1.53E-39  | 0.87 |
| 29729 | 532813 | 533049 | 5.74E-18  | 0.85 |
| 29729 | 535275 | 536134 | 1.42E-38  | 0.84 |
| 29729 | 543134 | 543538 | 5.11E-17  | 0.62 |
| 29729 | 554321 | 554907 | 1.15E-14  | 0.62 |
| 29729 | 559784 | 560078 | 1.41E-07  | 0.74 |
| 29729 | 567572 | 567774 | 3.46E-10  | 0.64 |
| 29729 | 575157 | 575831 | 2.93E-21  | 0.88 |
| 29729 | 588728 | 589858 | 7.99E-54  | 0.84 |
| 29729 | 600872 | 601544 | 5.81E-25  | 0.87 |
| 29729 | 623990 | 624586 | 2.95E-40  | 0.9  |
| 29729 | 631588 | 632167 | 7.00E-09  | 0.8  |
| 29729 | 643093 | 643459 | 1.07E-67  | 0.82 |
| 29729 | 647127 | 647695 | 7.99E-34  | 0.73 |
| 29729 | 653151 | 654357 | 3.50E-73  | 0.81 |
| 29729 | 656734 | 657088 | 6.69E-19  | 0.84 |
| 29729 | 671553 | 671855 | 2.14E-37  | 0.92 |
| 29729 | 688213 | 688853 | 2.71E-22  | 0.81 |
| 29729 | 708143 | 709165 | 5.25E-64  | 0.64 |
| 29729 | 714669 | 715297 | 1.50E-68  | 0.85 |
| 29729 | 727795 | 728151 | 6.14E-24  | 0.79 |
| 29729 | 732424 | 733876 | 2.99E-70  | 0.85 |
| 29729 | 741378 | 742417 | 1.58E-35  | 0.84 |
| 29730 | 44618  | 44975  | 1.55E-04  | 0.9  |
| 29731 | 65631  | 66195  | 2.29E-06  | 0.84 |
| 29731 | 96106  | 96539  | 1.28E-04  | 0.88 |
| 29731 | 117915 | 118285 | 1.27E-13  | 0.8  |
| 29731 | 118063 | 118402 | 3.51E-13  | 0.81 |
| 29732 | 23545  | 24184  | 1.94E-23  | 0.8  |
| 29732 | 23853  | 24235  | 1.25E-20  | 0.82 |
| 29732 | 35649  | 36164  | 3.55E-30  | 0.84 |
| 29732 | 60757  | 61373  | 6.64E-32  | 0.66 |
| 29732 | 61901  | 62652  | 3.35E-41  | 0.92 |
| 29732 | 75018  | 75481  | 9.37E-30  | 0.78 |
| 29732 | 86342  | 86575  | 1.78E-33  | 0.9  |
| 29732 | 86779  | 87090  | 3.50E-29  | 0.76 |
| 29732 | 87325  | 87952  | 9.37E-41  | 0.94 |
| 29732 | 105230 | 106201 | 7.36E-33  | 0.83 |
| 29732 | 106836 | 107661 | 1.09E-30  | 0.85 |
| 29732 | 108104 | 108454 | 4.29E-21  | 0.85 |
| 29732 | 108689 | 111155 | 5.20E-77  | 0.79 |
| 29733 | 2655   | 3106   | 6.22E-62  | 0.95 |
| 29733 | 23304  | 23514  | 1.80E-19  | 0.95 |

|       |        |        |          |      |
|-------|--------|--------|----------|------|
| 29733 | 24873  | 27120  | 2.44E-95 | 0.93 |
| 29733 | 53825  | 54379  | 5.40E-49 | 0.87 |
| 29733 | 63420  | 63650  | 3.76E-10 | 0.76 |
| 29733 | 64467  | 65089  | 1.19E-14 | 0.8  |
| 29733 | 76973  | 77450  | 1.00E-21 | 0.92 |
| 29733 | 79450  | 79800  | 5.01E-24 | 0.88 |
| 29733 | 107673 | 107873 | 5.06E-18 | 0.83 |
| 29733 | 115364 | 116728 | 2.49E-70 | 0.87 |
| 29733 | 122754 | 122992 | 1.25E-53 | 0.94 |
| 29733 | 136136 | 136409 | 2.39E-19 | 0.93 |
| 29733 | 145978 | 146539 | 3.34E-11 | 0.93 |
| 29733 | 188367 | 189060 | 6.12E-62 | 0.93 |
| 29733 | 189323 | 189559 | 8.66E-30 | 0.84 |
| 29733 | 190998 | 191491 | 1.52E-32 | 0.92 |
| 29733 | 193125 | 193577 | 2.20E-44 | 0.93 |
| 29733 | 194425 | 195058 | 9.51E-47 | 0.86 |
| 29733 | 196141 | 196435 | 5.57E-19 | 0.88 |
| 29733 | 196730 | 197444 | 1.39E-54 | 0.87 |
| 29733 | 204970 | 205598 | 1.41E-43 | 0.86 |
| 29733 | 260270 | 260795 | 1.21E-11 | 0.77 |
| 29733 | 261315 | 261766 | 1.26E-26 | 0.86 |
| 29733 | 262541 | 263496 | 3.31E-42 | 0.86 |
| 29733 | 270905 | 271839 | 3.56E-39 | 0.75 |
| 29733 | 275315 | 275669 | 3.59E-46 | 0.61 |
| 29733 | 276083 | 276746 | 2.29E-70 | 0.94 |
| 29733 | 276964 | 277249 | 1.99E-25 | 0.89 |
| 29733 | 281612 | 281832 | 1.86E-06 | 0.97 |
| 29733 | 289455 | 290196 | 6.36E-20 | 0.66 |
| 29733 | 290811 | 291200 | 2.30E-13 | 0.87 |
| 29733 | 347745 | 348293 | 4.50E-09 | 0.79 |
| 29733 | 348541 | 349113 | 2.43E-26 | 0.89 |
| 29733 | 367744 | 368735 | 2.96E-35 | 0.84 |
| 29733 | 369014 | 369400 | 3.83E-20 | 0.89 |
| 29733 | 402472 | 402848 | 1.38E-37 | 0.97 |
| 29733 | 431370 | 431763 | 6.48E-29 | 0.81 |
| 29733 | 432678 | 433686 | 1.19E-37 | 0.89 |
| 29733 | 434313 | 434778 | 5.07E-20 | 0.8  |
| 29733 | 483541 | 484366 | 3.44E-30 | 0.88 |
| 29733 | 511553 | 511954 | 3.63E-07 | 0.8  |
| 29733 | 522122 | 523251 | 5.16E-49 | 0.85 |
| 29733 | 523542 | 523913 | 1.84E-15 | 0.8  |
| 29733 | 569016 | 569628 | 3.66E-09 | 0.71 |
| 29733 | 578245 | 578741 | 4.01E-25 | 0.83 |
| 29733 | 578760 | 579192 | 9.81E-13 | 0.79 |
| 29733 | 580077 | 581069 | 1.02E-61 | 0.89 |
| 29733 | 620860 | 621496 | 8.92E-10 | 0.6  |
| 29733 | 629903 | 630110 | 1.79E-13 | 0.9  |
| 29733 | 634350 | 634765 | 2.93E-61 | 0.97 |
| 29734 | 20747  | 21117  | 3.00E-34 | 0.96 |
| 29734 | 37512  | 37747  | 1.01E-09 | 0.98 |
| 29734 | 61353  | 61697  | 5.13E-06 | 0.86 |
| 29734 | 62984  | 63193  | 1.28E-05 | 0.91 |
| 29734 | 75281  | 75968  | 1.60E-12 | 0.95 |

|       |        |        |           |      |
|-------|--------|--------|-----------|------|
| 29734 | 116401 | 116769 | 7.39E-22  | 0.96 |
| 29734 | 127861 | 128488 | 5.10E-20  | 0.79 |
| 29734 | 152061 | 152807 | 2.79E-19  | 0.84 |
| 29734 | 178026 | 178476 | 4.66E-33  | 0.89 |
| 29734 | 203173 | 204190 | 4.64E-18  | 0.82 |
| 29734 | 204190 | 206263 | 1.94E-60  | 0.61 |
| 29734 | 240909 | 241249 | 3.69E-10  | 0.95 |
| 29734 | 247592 | 247866 | 9.38E-36  | 0.96 |
| 29734 | 250199 | 250561 | 1.14E-07  | 0.89 |
| 29734 | 288091 | 288860 | 3.05E-108 | 0.93 |
| 29734 | 289504 | 289841 | 3.29E-42  | 0.94 |
| 29734 | 293895 | 294226 | 2.06E-19  | 0.87 |
| 29734 | 295015 | 295381 | 2.36E-20  | 0.72 |
| 29734 | 326375 | 326730 | 1.19E-03  | 1    |
| 29735 | 6220   | 6520   | 7.79E-06  | 0.96 |
| 29736 | 40895  | 42476  | 2.77E-59  | 0.73 |
| 29736 | 82448  | 83172  | 5.12E-21  | 0.82 |
| 29736 | 119802 | 120141 | 1.50E-29  | 0.85 |
| 29736 | 120365 | 121531 | 8.03E-66  | 0.82 |
| 29736 | 155093 | 155463 | 2.79E-32  | 0.93 |
| 29736 | 156306 | 156606 | 7.82E-25  | 0.86 |
| 29736 | 190784 | 191231 | 9.54E-25  | 0.77 |
| 29736 | 198390 | 198926 | 3.85E-70  | 0.82 |
| 29736 | 199293 | 199503 | 1.04E-37  | 0.97 |
| 29736 | 200008 | 200832 | 1.17E-36  | 0.88 |
| 29736 | 212257 | 212514 | 1.28E-09  | 0.77 |
| 29736 | 229600 | 230203 | 8.19E-45  | 0.86 |
| 29736 | 230751 | 231194 | 7.30E-28  | 0.92 |
| 29736 | 233080 | 233489 | 4.20E-14  | 0.8  |
| 29736 | 242650 | 243223 | 2.95E-27  | 0.91 |
| 29736 | 248391 | 249117 | 6.26E-30  | 0.89 |
| 29736 | 249550 | 249829 | 1.67E-27  | 0.94 |
| 29736 | 258160 | 259350 | 6.87E-43  | 0.68 |
| 29736 | 263019 | 263865 | 7.31E-55  | 0.75 |
| 29736 | 264077 | 264341 | 1.13E-21  | 0.68 |
| 29736 | 267972 | 268896 | 4.10E-35  | 0.82 |
| 29736 | 273151 | 273564 | 5.26E-32  | 0.78 |
| 29736 | 277310 | 278718 | 1.85E-48  | 0.85 |
| 29736 | 284760 | 285417 | 8.73E-53  | 0.77 |
| 29736 | 287168 | 287410 | 1.82E-20  | 0.6  |
| 29736 | 350640 | 351517 | 5.44E-37  | 0.79 |
| 29736 | 354178 | 354612 | 7.99E-42  | 0.95 |
| 29736 | 356242 | 357545 | 1.98E-75  | 0.85 |
| 29736 | 384861 | 385912 | 4.03E-50  | 0.87 |
| 29736 | 398678 | 399076 | 1.04E-22  | 0.84 |
| 29736 | 400558 | 402548 | 5.13E-78  | 0.8  |
| 29736 | 428222 | 428579 | 6.08E-22  | 0.64 |
| 29736 | 443104 | 443442 | 3.85E-08  | 0.95 |
| 29736 | 466074 | 466367 | 1.10E-15  | 0.66 |
| 29736 | 467936 | 468801 | 6.00E-35  | 0.81 |
| 29736 | 496032 | 496706 | 5.38E-28  | 0.84 |
| 29736 | 498760 | 499066 | 6.95E-23  | 0.75 |
| 29736 | 521117 | 521799 | 2.51E-41  | 0.7  |

|       |        |        |           |      |
|-------|--------|--------|-----------|------|
| 29736 | 523422 | 523874 | 5.41E-32  | 0.86 |
| 29736 | 527507 | 528529 | 8.75E-38  | 0.71 |
| 29736 | 528731 | 529049 | 3.08E-20  | 0.9  |
| 29736 | 531693 | 532251 | 1.80E-30  | 0.88 |
| 29736 | 534020 | 534342 | 4.27E-24  | 0.94 |
| 29736 | 538139 | 538372 | 9.60E-27  | 0.95 |
| 29736 | 538725 | 539115 | 1.28E-29  | 0.89 |
| 29736 | 586210 | 586514 | 9.63E-15  | 0.84 |
| 29736 | 634684 | 635915 | 3.94E-84  | 0.81 |
| 29736 | 652834 | 653112 | 7.76E-13  | 0.8  |
| 29736 | 656786 | 657837 | 4.39E-42  | 0.85 |
| 29736 | 661438 | 662769 | 7.91E-78  | 0.65 |
| 29736 | 666947 | 667402 | 5.99E-25  | 0.81 |
| 29736 | 697444 | 698038 | 6.00E-50  | 0.79 |
| 29736 | 699188 | 699433 | 2.56E-61  | 0.9  |
| 29736 | 714083 | 714752 | 1.69E-54  | 0.9  |
| 29736 | 723933 | 724813 | 3.21E-66  | 0.8  |
| 29736 | 764702 | 765018 | 4.27E-19  | 0.7  |
| 29736 | 769322 | 769592 | 5.98E-11  | 0.72 |
| 29736 | 792689 | 793092 | 1.54E-23  | 0.93 |
| 29736 | 793583 | 794776 | 7.52E-24  | 0.65 |
| 29736 | 809871 | 812034 | 1.76E-148 | 0.88 |
| 29736 | 812488 | 813290 | 1.88E-39  | 0.91 |
| 29736 | 834073 | 836244 | 1.42E-234 | 0.85 |
| 29736 | 841275 | 841797 | 8.01E-30  | 0.8  |
| 29737 | 18646  | 19017  | 1.97E-11  | 0.69 |
| 29737 | 27769  | 28362  | 2.00E-15  | 0.8  |
| 29737 | 49063  | 49740  | 3.49E-31  | 0.88 |
| 29737 | 50742  | 51089  | 1.08E-31  | 0.89 |
| 29737 | 53449  | 53910  | 8.46E-17  | 0.91 |
| 29737 | 57454  | 58104  | 6.08E-32  | 0.74 |
| 29737 | 58441  | 59408  | 2.94E-52  | 0.83 |
| 29737 | 71222  | 71489  | 1.25E-20  | 0.9  |
| 29737 | 72283  | 72646  | 4.37E-41  | 0.74 |
| 29737 | 111686 | 112043 | 3.20E-19  | 0.74 |
| 29737 | 112670 | 113040 | 1.98E-38  | 0.86 |
| 29737 | 113281 | 113661 | 1.99E-08  | 0.69 |
| 29737 | 118610 | 119222 | 5.51E-47  | 0.91 |
| 29737 | 126244 | 126788 | 2.47E-70  | 0.88 |
| 29737 | 154263 | 154851 | 6.78E-47  | 0.87 |
| 29737 | 164212 | 164486 | 1.60E-30  | 0.82 |
| 29737 | 166594 | 166835 | 3.68E-20  | 0.7  |
| 29737 | 189601 | 190003 | 1.17E-28  | 0.89 |
| 29737 | 201713 | 202041 | 9.13E-24  | 0.88 |
| 29737 | 212175 | 212709 | 6.31E-25  | 0.79 |
| 29737 | 213321 | 213859 | 4.01E-55  | 0.91 |
| 29737 | 237137 | 237843 | 9.95E-41  | 0.71 |
| 29737 | 266003 | 266494 | 1.77E-07  | 0.96 |
| 29737 | 270782 | 271225 | 1.09E-10  | 0.96 |
| 29737 | 272518 | 272884 | 1.53E-13  | 0.83 |
| 29737 | 272601 | 273121 | 2.38E-16  | 0.82 |
| 29737 | 272836 | 273185 | 6.09E-13  | 0.79 |
| 29737 | 282237 | 282836 | 6.04E-31  | 0.85 |

|       |        |        |           |      |
|-------|--------|--------|-----------|------|
| 29737 | 283454 | 284310 | 6.37E-27  | 0.84 |
| 29737 | 314404 | 314834 | 1.40E-56  | 0.73 |
| 29737 | 320585 | 323391 | 3.67E-100 | 0.64 |
| 29737 | 332411 | 332705 | 7.33E-21  | 0.82 |
| 29737 | 333783 | 334531 | 8.56E-40  | 0.91 |
| 29737 | 366822 | 367154 | 2.58E-26  | 0.96 |
| 29737 | 367396 | 367966 | 1.32E-92  | 0.9  |
| 29737 | 369688 | 369950 | 2.59E-15  | 0.88 |
| 29737 | 370562 | 370818 | 1.47E-13  | 0.86 |
| 29737 | 375225 | 376322 | 1.16E-103 | 0.88 |
| 29737 | 395896 | 396181 | 3.25E-09  | 0.63 |
| 29737 | 397368 | 397904 | 1.34E-13  | 0.84 |
| 29737 | 403514 | 404034 | 1.08E-37  | 0.88 |
| 29737 | 407232 | 407473 | 2.37E-18  | 0.9  |
| 29737 | 413502 | 413951 | 7.95E-29  | 0.66 |
| 29737 | 432806 | 433172 | 1.76E-19  | 0.9  |
| 29737 | 448506 | 449229 | 4.42E-48  | 0.78 |
| 29737 | 451135 | 451425 | 1.26E-20  | 0.69 |
| 29737 | 476501 | 477184 | 1.50E-20  | 0.64 |
| 29737 | 488537 | 488993 | 5.67E-29  | 0.77 |
| 29737 | 489414 | 491066 | 1.06E-82  | 0.79 |
| 29737 | 497557 | 498003 | 1.73E-10  | 0.89 |
| 29737 | 502196 | 502651 | 4.41E-04  | 0.89 |
| 29737 | 520761 | 521504 | 4.07E-56  | 0.73 |
| 29737 | 521968 | 522530 | 5.28E-30  | 0.65 |
| 29737 | 522734 | 523039 | 4.75E-25  | 0.68 |
| 29737 | 532606 | 533162 | 6.42E-25  | 0.84 |
| 29737 | 533442 | 533825 | 8.96E-38  | 0.9  |
| 29737 | 545891 | 546529 | 7.27E-07  | 0.76 |
| 29737 | 547140 | 547379 | 2.12E-17  | 0.84 |
| 29738 | 13172  | 13464  | 3.47E-21  | 0.86 |
| 29738 | 15180  | 15781  | 7.76E-47  | 0.89 |
| 29738 | 23364  | 23564  | 1.63E-28  | 0.96 |
| 29738 | 27975  | 28586  | 4.10E-56  | 0.91 |
| 29738 | 29369  | 30008  | 2.24E-29  | 0.74 |
| 29738 | 37270  | 37669  | 2.27E-39  | 0.73 |
| 29738 | 42048  | 42539  | 1.20E-46  | 0.75 |
| 29738 | 95853  | 96759  | 4.92E-53  | 0.86 |
| 29738 | 97009  | 97225  | 4.54E-11  | 0.78 |
| 29738 | 97330  | 97699  | 1.52E-23  | 0.8  |
| 29738 | 102688 | 103533 | 2.84E-37  | 0.88 |
| 29738 | 103746 | 104305 | 7.64E-36  | 0.92 |
| 29738 | 187826 | 188341 | 2.11E-24  | 0.85 |
| 29738 | 229018 | 230501 | 5.68E-133 | 0.87 |
| 29738 | 230915 | 231467 | 2.38E-25  | 0.92 |
| 29738 | 231692 | 232568 | 2.12E-38  | 0.87 |
| 29738 | 242224 | 242736 | 4.06E-32  | 0.87 |
| 29738 | 242945 | 243807 | 1.54E-40  | 0.84 |
| 29738 | 284462 | 284903 | 9.19E-20  | 0.84 |
| 29738 | 285745 | 286101 | 1.23E-24  | 0.88 |
| 29738 | 380549 | 381521 | 6.43E-70  | 0.8  |
| 29738 | 381783 | 382082 | 2.73E-19  | 0.82 |
| 29738 | 385376 | 386205 | 1.56E-56  | 0.79 |



|       |        |        |           |      |
|-------|--------|--------|-----------|------|
| 29738 | 426800 | 427125 | 1.38E-05  | 0.92 |
| 29738 | 429469 | 430033 | 9.66E-07  | 0.72 |
| 29738 | 440852 | 441456 | 5.87E-32  | 0.86 |
| 29738 | 465697 | 466077 | 5.22E-24  | 0.65 |
| 29738 | 469568 | 469784 | 2.21E-12  | 0.77 |
| 29738 | 471255 | 471977 | 4.57E-25  | 0.83 |
| 29739 | 38931  | 39464  | 1.73E-41  | 0.68 |
| 29739 | 39724  | 40123  | 1.08E-58  | 0.9  |
| 29739 | 40777  | 41040  | 3.66E-37  | 0.81 |
| 29739 | 47040  | 48343  | 1.09E-68  | 0.78 |
| 29739 | 64586  | 64911  | 1.08E-23  | 0.87 |
| 29739 | 67158  | 67835  | 5.52E-23  | 0.79 |
| 29739 | 119996 | 120395 | 3.16E-30  | 0.82 |
| 29739 | 121680 | 122418 | 2.78E-39  | 0.84 |
| 29739 | 122687 | 123657 | 1.33E-27  | 0.77 |
| 29739 | 129632 | 131333 | 1.50E-181 | 0.8  |
| 29739 | 167717 | 168196 | 1.62E-24  | 0.8  |
| 29739 | 168738 | 169089 | 2.52E-10  | 0.74 |
| 29739 | 171590 | 172334 | 4.39E-29  | 0.74 |
| 29739 | 181483 | 182128 | 2.39E-30  | 0.92 |
| 29739 | 182412 | 182849 | 1.20E-25  | 0.82 |
| 29739 | 229873 | 230412 | 7.89E-15  | 0.7  |
| 29739 | 234212 | 235318 | 4.28E-77  | 0.87 |
| 29739 | 236043 | 237356 | 5.04E-55  | 0.73 |
| 29739 | 297515 | 298009 | 2.19E-17  | 0.76 |
| 29739 | 311035 | 312288 | 1.56E-80  | 0.68 |
| 29739 | 312514 | 312975 | 1.14E-26  | 0.85 |
| 29739 | 315519 | 315854 | 9.17E-28  | 0.87 |
| 29739 | 330629 | 330905 | 4.13E-09  | 0.88 |
| 29739 | 387064 | 387372 | 5.65E-10  | 0.72 |
| 29739 | 387815 | 388455 | 3.41E-37  | 0.88 |
| 29739 | 392570 | 393661 | 1.61E-80  | 0.9  |
| 29739 | 426219 | 426614 | 7.46E-13  | 0.64 |
| 29739 | 432124 | 434186 | 1.93E-68  | 0.82 |
| 29739 | 434591 | 434908 | 1.14E-17  | 0.86 |
| 29739 | 480491 | 481413 | 6.12E-45  | 0.81 |
| 29739 | 481717 | 482242 | 2.63E-37  | 0.88 |
| 29739 | 486324 | 486558 | 8.09E-29  | 0.89 |
| 29739 | 487968 | 488752 | 1.15E-51  | 0.83 |
| 29739 | 489750 | 490057 | 6.83E-19  | 0.84 |
| 29739 | 490949 | 491282 | 1.81E-09  | 0.81 |
| 29739 | 492980 | 494461 | 2.77E-105 | 0.81 |
| 29739 | 495278 | 495671 | 3.28E-33  | 0.85 |
| 29739 | 503286 | 503811 | 3.53E-28  | 0.91 |
| 29739 | 504027 | 504479 | 1.75E-39  | 0.95 |
| 29739 | 583032 | 583651 | 1.25E-25  | 0.85 |
| 29739 | 588799 | 589313 | 6.56E-25  | 0.87 |
| 29739 | 598760 | 599484 | 5.91E-25  | 0.85 |
| 29739 | 607525 | 608040 | 2.71E-41  | 0.9  |
| 29739 | 616404 | 616957 | 3.81E-23  | 0.8  |
| 29739 | 625389 | 626871 | 3.41E-57  | 0.8  |
| 29739 | 645320 | 645928 | 4.89E-21  | 0.74 |
| 29739 | 715079 | 716961 | 4.78E-92  | 0.86 |

|       |         |         |           |      |
|-------|---------|---------|-----------|------|
| 29739 | 721307  | 721959  | 7.33E-29  | 0.83 |
| 29739 | 725861  | 726264  | 6.91E-48  | 0.93 |
| 29739 | 736702  | 738425  | 1.68E-101 | 0.87 |
| 29739 | 740882  | 741166  | 4.28E-38  | 0.93 |
| 29739 | 746076  | 747167  | 4.86E-57  | 0.71 |
| 29739 | 748897  | 749159  | 1.33E-07  | 0.69 |
| 29739 | 758170  | 758638  | 3.16E-19  | 0.79 |
| 29739 | 758947  | 760138  | 4.88E-54  | 0.85 |
| 29739 | 763103  | 764510  | 3.86E-103 | 0.89 |
| 29739 | 764741  | 765540  | 1.90E-61  | 0.8  |
| 29739 | 778537  | 778966  | 1.72E-15  | 0.78 |
| 29739 | 779976  | 780225  | 1.63E-28  | 0.89 |
| 29739 | 788563  | 790927  | 2.94E-83  | 0.82 |
| 29739 | 791151  | 792015  | 1.40E-77  | 0.92 |
| 29739 | 818604  | 818851  | 2.76E-14  | 0.61 |
| 29739 | 825476  | 825891  | 1.78E-30  | 0.88 |
| 29739 | 826157  | 826585  | 2.64E-26  | 0.84 |
| 29739 | 827077  | 828463  | 2.56E-77  | 0.93 |
| 29739 | 896948  | 897766  | 2.37E-31  | 0.83 |
| 29739 | 940531  | 941652  | 7.11E-37  | 0.7  |
| 29739 | 981946  | 982633  | 8.10E-31  | 0.9  |
| 29739 | 1029486 | 1030037 | 2.26E-45  | 0.91 |
| 29739 | 1030274 | 1030524 | 2.67E-19  | 0.87 |
| 29739 | 1030791 | 1031304 | 1.97E-22  | 0.81 |
| 29739 | 1047400 | 1048983 | 5.42E-92  | 0.79 |
| 29739 | 1049232 | 1049616 | 3.20E-18  | 0.65 |
| 29739 | 1049825 | 1050527 | 1.56E-20  | 0.75 |
| 29739 | 1072914 | 1073930 | 2.08E-90  | 0.9  |
| 29739 | 1091459 | 1091927 | 9.76E-47  | 0.91 |
| 29739 | 1092272 | 1092617 | 7.68E-28  | 0.91 |
| 29739 | 1093090 | 1093576 | 2.62E-26  | 0.89 |
| 29739 | 1094340 | 1094800 | 2.12E-27  | 0.9  |
| 29739 | 1099995 | 1100270 | 2.41E-20  | 0.8  |
| 29739 | 1166415 | 1166705 | 7.45E-39  | 0.86 |
| 29739 | 1204273 | 1204712 | 2.96E-69  | 0.93 |
| 29739 | 1207054 | 1207880 | 2.85E-68  | 0.86 |
| 29739 | 1210512 | 1211057 | 1.68E-22  | 0.75 |
| 29739 | 1238122 | 1239051 | 3.06E-43  | 0.72 |
| 29739 | 1245138 | 1247624 | 6.59E-164 | 0.86 |
| 29739 | 1254671 | 1255194 | 5.54E-14  | 0.7  |
| 29739 | 1267215 | 1268245 | 1.18E-90  | 0.81 |
| 29739 | 1277822 | 1278293 | 1.84E-20  | 0.8  |
| 29739 | 1280704 | 1281318 | 1.73E-16  | 0.86 |
| 29739 | 1292775 | 1293326 | 1.26E-39  | 0.83 |
| 29739 | 1294509 | 1294915 | 5.93E-13  | 0.8  |
| 29739 | 1299819 | 1300528 | 1.13E-46  | 0.91 |
| 29739 | 1300871 | 1301579 | 1.91E-34  | 0.91 |
| 29740 | 16154   | 16578   | 3.52E-13  | 0.83 |
| 29740 | 21214   | 21883   | 2.22E-24  | 0.69 |
| 29740 | 51146   | 51439   | 4.43E-06  | 0.65 |
| 29740 | 63976   | 64771   | 3.40E-36  | 0.86 |
| 29740 | 77069   | 78083   | 2.68E-46  | 0.74 |
| 29740 | 81571   | 81970   | 1.99E-22  | 0.65 |

|       |        |        |           |      |
|-------|--------|--------|-----------|------|
| 29740 | 100282 | 100875 | 7.59E-62  | 0.78 |
| 29740 | 103010 | 104013 | 6.31E-109 | 0.79 |
| 29740 | 104874 | 105768 | 7.61E-116 | 0.88 |
| 29740 | 112205 | 112451 | 1.07E-45  | 0.76 |
| 29740 | 156992 | 157628 | 3.34E-24  | 0.84 |
| 29740 | 160344 | 160584 | 1.88E-19  | 0.9  |
| 29740 | 197259 | 197629 | 7.09E-37  | 0.83 |
| 29740 | 199113 | 199829 | 1.26E-39  | 0.83 |
| 29740 | 203398 | 204200 | 8.53E-59  | 0.9  |
| 29740 | 212942 | 213581 | 5.43E-41  | 0.96 |
| 29740 | 221032 | 221973 | 1.34E-46  | 0.85 |
| 29741 | 36775  | 36982  | 2.67E-17  | 0.92 |
| 29742 | 18793  | 19655  | 5.01E-62  | 0.83 |
| 29742 | 37070  | 37346  | 1.14E-16  | 0.98 |
| 29742 | 45883  | 46247  | 1.02E-56  | 0.97 |
| 29742 | 55535  | 56011  | 3.86E-18  | 0.8  |
| 29742 | 118698 | 119640 | 2.48E-54  | 0.89 |
| 29742 | 156224 | 156955 | 2.94E-40  | 0.83 |
| 29742 | 203753 | 204072 | 2.49E-16  | 0.9  |
| 29742 | 262159 | 262545 | 1.17E-06  | 0.74 |
| 29742 | 276386 | 276753 | 1.41E-10  | 0.67 |
| 29742 | 310661 | 311143 | 7.86E-23  | 0.82 |
| 29742 | 315468 | 315752 | 2.35E-15  | 0.65 |
| 29742 | 315980 | 316451 | 1.32E-28  | 0.8  |
| 29742 | 320175 | 320510 | 3.50E-22  | 0.84 |
| 29742 | 324927 | 325139 | 1.12E-24  | 0.86 |
| 29742 | 350473 | 350692 | 2.95E-18  | 0.83 |
| 29742 | 365526 | 366097 | 4.58E-30  | 0.88 |
| 29742 | 367179 | 368167 | 2.23E-54  | 0.89 |
| 29742 | 370842 | 371648 | 5.20E-67  | 0.86 |
| 29742 | 372315 | 373450 | 1.59E-45  | 0.67 |
| 29742 | 383142 | 383504 | 3.80E-91  | 0.86 |
| 29742 | 395034 | 395327 | 8.46E-55  | 0.97 |
| 29742 | 412400 | 412803 | 2.85E-15  | 0.73 |
| 29742 | 415929 | 416312 | 1.14E-40  | 0.9  |
| 29742 | 417610 | 419083 | 2.22E-84  | 0.71 |
| 29742 | 448812 | 449135 | 2.30E-12  | 0.83 |
| 29742 | 472834 | 473094 | 9.86E-40  | 0.94 |
| 29742 | 480888 | 481622 | 2.11E-34  | 0.7  |
| 29742 | 481176 | 482103 | 1.96E-64  | 0.85 |
| 29742 | 482407 | 482635 | 1.10E-14  | 0.9  |
| 29742 | 483466 | 484121 | 2.45E-32  | 0.81 |
| 29742 | 484810 | 485240 | 1.07E-18  | 0.83 |
| 29742 | 485961 | 486196 | 3.35E-16  | 0.88 |
| 29742 | 521382 | 522403 | 8.75E-68  | 0.79 |
| 29743 | 11179  | 12246  | 2.79E-60  | 0.84 |
| 29743 | 14000  | 14899  | 4.84E-57  | 0.96 |
| 29743 | 26492  | 26938  | 3.00E-39  | 0.84 |
| 29743 | 109846 | 110472 | 7.62E-28  | 0.74 |
| 29743 | 112646 | 113208 | 2.96E-39  | 0.84 |
| 29743 | 116718 | 118495 | 4.49E-83  | 0.87 |
| 29743 | 119435 | 119737 | 3.82E-17  | 0.82 |
| 29743 | 167212 | 167556 | 2.16E-23  | 0.93 |

|       |        |        |           |      |
|-------|--------|--------|-----------|------|
| 29743 | 171673 | 172390 | 3.26E-64  | 0.87 |
| 29743 | 184485 | 185038 | 4.15E-35  | 0.86 |
| 29743 | 188199 | 188675 | 3.31E-32  | 0.82 |
| 29743 | 190253 | 191012 | 2.31E-36  | 0.8  |
| 29743 | 191620 | 192169 | 8.92E-15  | 0.84 |
| 29743 | 195032 | 195263 | 4.30E-28  | 0.91 |
| 29743 | 200661 | 201056 | 8.97E-11  | 0.74 |
| 29743 | 200682 | 201085 | 9.03E-12  | 0.81 |
| 29743 | 205998 | 206371 | 6.02E-14  | 0.95 |
| 29743 | 273255 | 273515 | 7.75E-04  | 0.83 |
| 29744 | 7777   | 8615   | 5.74E-40  | 0.9  |
| 29744 | 24913  | 25848  | 3.70E-18  | 0.67 |
| 29744 | 33359  | 33996  | 1.08E-35  | 0.83 |
| 29744 | 43257  | 43724  | 4.57E-20  | 0.93 |
| 29744 | 49791  | 50084  | 5.45E-20  | 0.82 |
| 29744 | 53959  | 54671  | 7.05E-24  | 0.83 |
| 29744 | 55245  | 55608  | 9.95E-10  | 0.81 |
| 29744 | 55294  | 55612  | 4.33E-09  | 0.83 |
| 29744 | 56291  | 56577  | 6.18E-08  | 0.88 |
| 29744 | 67990  | 68371  | 3.16E-09  | 0.98 |
| 29744 | 75773  | 76007  | 2.09E-29  | 0.9  |
| 29744 | 80820  | 81085  | 3.40E-06  | 1    |
| 29744 | 91097  | 91509  | 6.55E-07  | 0.79 |
| 29745 | 14633  | 14957  | 8.18E-51  | 0.93 |
| 29745 | 15522  | 15872  | 4.24E-28  | 0.98 |
| 29745 | 26550  | 26807  | 1.19E-10  | 0.82 |
| 29745 | 46577  | 46916  | 2.26E-05  | 0.61 |
| 29745 | 86344  | 87027  | 5.64E-14  | 0.9  |
| 29745 | 97755  | 98324  | 7.77E-34  | 0.85 |
| 29745 | 104998 | 105787 | 2.85E-36  | 0.65 |
| 29745 | 115511 | 116313 | 5.21E-42  | 0.79 |
| 29745 | 130869 | 131123 | 6.14E-42  | 0.94 |
| 29745 | 133529 | 133965 | 3.35E-26  | 0.86 |
| 29745 | 136629 | 137888 | 3.17E-49  | 0.7  |
| 29745 | 142317 | 143161 | 8.70E-24  | 0.79 |
| 29745 | 156443 | 157448 | 1.56E-78  | 0.81 |
| 29745 | 165444 | 166410 | 1.90E-53  | 0.69 |
| 29745 | 171776 | 172269 | 2.11E-30  | 0.9  |
| 29745 | 172601 | 173942 | 5.23E-82  | 0.9  |
| 29745 | 174588 | 175200 | 1.46E-60  | 0.85 |
| 29745 | 184432 | 185135 | 9.20E-101 | 0.74 |
| 29745 | 186320 | 186979 | 1.06E-44  | 0.88 |
| 29746 | 90714  | 90943  | 1.37E-07  | 0.82 |
| 29747 | 12446  | 12794  | 7.58E-12  | 0.81 |
| 29747 | 17488  | 18542  | 9.69E-46  | 0.81 |
| 29747 | 26956  | 27459  | 4.70E-29  | 0.89 |
| 29747 | 27792  | 28713  | 2.25E-33  | 0.86 |
| 29747 | 31033  | 31429  | 1.58E-09  | 0.72 |
| 29747 | 47107  | 48378  | 1.62E-56  | 0.8  |
| 29747 | 84176  | 86278  | 9.45E-107 | 0.94 |
| 29747 | 116407 | 116721 | 2.21E-14  | 0.81 |
| 29747 | 119659 | 120019 | 2.08E-11  | 0.81 |
| 29747 | 123214 | 123597 | 4.33E-19  | 0.73 |

|       |        |        |           |      |
|-------|--------|--------|-----------|------|
| 29747 | 179440 | 179712 | 2.19E-16  | 0.79 |
| 29747 | 215861 | 216326 | 4.21E-08  | 0.77 |
| 29747 | 258162 | 258676 | 1.08E-10  | 0.79 |
| 29747 | 282181 | 282843 | 2.77E-08  | 0.92 |
| 29747 | 294506 | 295723 | 2.37E-52  | 0.86 |
| 29747 | 298748 | 299127 | 7.54E-36  | 0.69 |
| 29747 | 345699 | 346032 | 8.24E-32  | 0.82 |
| 29747 | 346766 | 347475 | 4.25E-19  | 0.81 |
| 29747 | 348172 | 348667 | 3.05E-14  | 0.79 |
| 29747 | 349208 | 350261 | 1.96E-74  | 0.91 |
| 29747 | 350514 | 351269 | 9.51E-30  | 0.65 |
| 29747 | 388417 | 388924 | 3.54E-15  | 0.78 |
| 29747 | 458637 | 458927 | 2.59E-36  | 0.74 |
| 29747 | 459167 | 459836 | 2.14E-23  | 0.64 |
| 29747 | 460090 | 460534 | 9.46E-45  | 0.73 |
| 29747 | 469273 | 470567 | 5.81E-108 | 0.85 |
| 29747 | 470780 | 471773 | 2.62E-60  | 0.89 |
| 29748 | 24397  | 24639  | 1.15E-18  | 0.87 |
| 29748 | 48377  | 48726  | 1.80E-20  | 0.81 |
| 29748 | 52251  | 52825  | 7.52E-24  | 0.82 |
| 29748 | 139446 | 139655 | 1.33E-03  | 0.79 |
| 29748 | 193254 | 194467 | 3.41E-101 | 0.93 |
| 29748 | 212815 | 213039 | 8.87E-13  | 0.84 |
| 29748 | 222591 | 223104 | 1.42E-14  | 0.76 |
| 29748 | 230314 | 230770 | 2.25E-29  | 0.67 |
| 29748 | 240528 | 241223 | 3.72E-30  | 0.77 |
| 29748 | 242389 | 242768 | 4.85E-16  | 0.77 |
| 29748 | 243931 | 244420 | 6.43E-55  | 0.92 |
| 29748 | 244885 | 245230 | 6.64E-44  | 0.95 |
| 29748 | 251210 | 251531 | 3.30E-26  | 0.94 |
| 29748 | 351308 | 351771 | 4.66E-05  | 0.92 |
| 29748 | 447589 | 447820 | 2.86E-17  | 0.75 |
| 29748 | 448081 | 449123 | 8.12E-68  | 0.89 |
| 29748 | 449652 | 450085 | 4.14E-18  | 0.71 |
| 29748 | 450372 | 450988 | 1.32E-10  | 0.84 |
| 29748 | 453905 | 454180 | 7.84E-13  | 0.81 |
| 29748 | 492629 | 492952 | 1.22E-16  | 0.93 |
| 29748 | 528951 | 529594 | 2.55E-40  | 0.96 |
| 29748 | 542181 | 542611 | 7.81E-09  | 0.84 |
| 29748 | 553524 | 553852 | 5.09E-04  | 0.89 |
| 29748 | 565137 | 565484 | 6.85E-05  | 0.94 |
| 29748 | 578849 | 579159 | 5.00E-05  | 0.8  |
| 29749 | 9174   | 9735   | 5.75E-22  | 0.79 |
| 29749 | 10881  | 11644  | 1.92E-38  | 0.87 |
| 29749 | 13060  | 13332  | 1.18E-29  | 0.88 |
| 29749 | 18373  | 19276  | 8.03E-50  | 0.8  |
| 29749 | 19660  | 20058  | 2.13E-42  | 0.83 |
| 29749 | 21940  | 22573  | 2.72E-88  | 0.65 |
| 29749 | 25391  | 25817  | 1.17E-42  | 0.97 |
| 29749 | 49459  | 49865  | 1.06E-16  | 0.7  |
| 29749 | 89842  | 90790  | 5.92E-42  | 0.67 |
| 29749 | 102791 | 103193 | 4.40E-12  | 0.93 |
| 29749 | 108257 | 108973 | 7.66E-63  | 0.89 |

|       |        |        |           |      |
|-------|--------|--------|-----------|------|
| 29749 | 110311 | 110698 | 3.16E-30  | 0.94 |
| 29750 | 78042  | 78320  | 2.83E-04  | 0.89 |
| 29751 | 1393   | 1795   | 3.02E-13  | 0.77 |
| 29751 | 5337   | 5585   | 2.15E-18  | 0.79 |
| 29751 | 12286  | 13222  | 1.88E-33  | 0.79 |
| 29751 | 30111  | 31148  | 2.32E-45  | 0.7  |
| 29751 | 36117  | 36767  | 2.30E-41  | 0.69 |
| 29751 | 48311  | 48591  | 7.65E-19  | 0.83 |
| 29751 | 51144  | 51727  | 1.01E-133 | 0.92 |
| 29751 | 52093  | 52318  | 1.08E-40  | 0.88 |
| 29751 | 52574  | 53318  | 6.26E-15  | 0.77 |
| 29751 | 56063  | 56875  | 2.07E-60  | 0.78 |
| 29751 | 64954  | 65873  | 9.34E-44  | 0.79 |
| 29751 | 71177  | 71826  | 7.71E-34  | 0.8  |
| 29751 | 73701  | 74194  | 6.02E-39  | 0.96 |
| 29751 | 74413  | 75605  | 7.83E-60  | 0.91 |
| 29751 | 85238  | 85654  | 1.35E-28  | 0.74 |
| 29751 | 113575 | 113819 | 9.10E-19  | 0.76 |
| 29751 | 115561 | 116066 | 1.36E-17  | 0.85 |
| 29751 | 118562 | 119337 | 5.45E-101 | 0.88 |
| 29751 | 123005 | 123697 | 1.28E-45  | 0.81 |
| 29751 | 123965 | 124859 | 3.10E-26  | 0.82 |
| 29751 | 125098 | 126153 | 3.91E-59  | 0.89 |
| 29751 | 162396 | 163222 | 1.10E-38  | 0.88 |
| 29751 | 165443 | 166273 | 1.61E-76  | 0.66 |
| 29751 | 171658 | 172509 | 5.63E-36  | 0.78 |
| 29751 | 176917 | 177459 | 1.01E-16  | 0.84 |
| 29751 | 189914 | 190147 | 1.71E-11  | 0.81 |
| 29751 | 192104 | 192423 | 9.37E-11  | 0.81 |
| 29751 | 196571 | 197054 | 3.36E-22  | 0.81 |
| 29751 | 259873 | 260170 | 1.31E-27  | 0.6  |
| 29751 | 288321 | 289417 | 4.68E-37  | 0.77 |
| 29751 | 372748 | 373237 | 1.32E-31  | 0.84 |
| 29751 | 382805 | 383692 | 9.68E-30  | 0.82 |
| 29751 | 390580 | 390827 | 7.27E-12  | 0.73 |
| 29751 | 415039 | 415420 | 2.22E-17  | 0.71 |
| 29751 | 423763 | 425416 | 5.72E-83  | 0.64 |
| 29751 | 427658 | 427941 | 1.37E-19  | 0.83 |
| 29751 | 439086 | 439647 | 3.28E-44  | 0.64 |
| 29751 | 441531 | 441893 | 1.87E-24  | 0.76 |
| 29751 | 442349 | 442693 | 1.18E-15  | 0.78 |
| 29751 | 469640 | 470215 | 2.58E-40  | 0.93 |
| 29751 | 507213 | 507784 | 3.28E-14  | 0.75 |
| 29751 | 510884 | 511296 | 1.07E-06  | 0.79 |
| 29751 | 543867 | 544756 | 1.57E-22  | 0.8  |
| 29751 | 548223 | 548674 | 2.29E-10  | 0.85 |
| 29751 | 564883 | 566012 | 8.86E-34  | 0.79 |
| 29751 | 610676 | 610923 | 2.99E-06  | 0.72 |
| 29751 | 660250 | 660663 | 7.27E-34  | 0.87 |
| 29751 | 672877 | 673309 | 1.36E-10  | 0.66 |
| 29751 | 684751 | 685460 | 6.42E-09  | 0.81 |
| 29751 | 698494 | 699048 | 3.16E-19  | 0.67 |
| 29751 | 704007 | 704208 | 8.41E-22  | 0.77 |

|       |        |        |           |      |
|-------|--------|--------|-----------|------|
| 29751 | 704490 | 705022 | 2.34E-24  | 0.76 |
| 29751 | 743491 | 744348 | 2.87E-24  | 0.61 |
| 29751 | 756003 | 756219 | 2.28E-21  | 0.84 |
| 29751 | 760128 | 760857 | 6.00E-26  | 0.81 |
| 29751 | 775622 | 776399 | 9.22E-17  | 0.69 |
| 29751 | 776792 | 777091 | 1.44E-19  | 0.78 |
| 29753 | 30049  | 30709  | 2.23E-34  | 0.77 |
| 29753 | 80932  | 81171  | 9.30E-13  | 0.84 |
| 29753 | 175293 | 175616 | 7.90E-19  | 0.84 |
| 29753 | 189930 | 190373 | 1.17E-109 | 0.96 |
| 29753 | 190902 | 191331 | 6.19E-16  | 0.93 |
| 29753 | 191808 | 192143 | 7.50E-57  | 0.93 |
| 29753 | 192374 | 192841 | 2.09E-44  | 0.93 |
| 29753 | 193072 | 194564 | 1.76E-114 | 0.95 |
| 29753 | 198390 | 200510 | 1.07E-133 | 0.92 |
| 29753 | 251354 | 251860 | 2.06E-12  | 0.68 |
| 29753 | 266313 | 266551 | 2.27E-15  | 0.72 |
| 29753 | 299921 | 302118 | 2.45E-173 | 0.94 |
| 29753 | 308144 | 308873 | 7.65E-103 | 0.95 |
| 29753 | 309241 | 309557 | 9.35E-24  | 0.93 |
| 29753 | 320633 | 321440 | 1.87E-68  | 0.94 |
| 29753 | 367290 | 368455 | 1.53E-38  | 0.85 |
| 29754 | 21852  | 22185  | 6.37E-12  | 0.87 |
| 29754 | 54380  | 55266  | 3.42E-64  | 0.9  |
| 29754 | 62098  | 62428  | 1.88E-44  | 0.84 |
| 29754 | 73001  | 73314  | 1.03E-11  | 0.96 |
| 29754 | 101600 | 101913 | 3.18E-09  | 0.88 |
| 29754 | 101885 | 102432 | 1.04E-29  | 0.91 |
| 29754 | 102697 | 103046 | 5.47E-24  | 0.97 |
| 29755 | 22492  | 22906  | 1.57E-10  | 0.81 |
| 29755 | 60382  | 60919  | 1.81E-80  | 0.94 |
| 29755 | 81254  | 81606  | 4.36E-21  | 0.9  |
| 29755 | 83229  | 83751  | 1.41E-76  | 0.94 |
| 29755 | 84002  | 84440  | 7.64E-131 | 0.92 |
| 29755 | 91872  | 92104  | 5.73E-11  | 0.65 |
| 29755 | 162290 | 163239 | 1.21E-57  | 0.68 |
| 29755 | 164441 | 165009 | 4.62E-23  | 0.62 |
| 29755 | 168656 | 169117 | 2.70E-25  | 0.96 |
| 29755 | 169318 | 169565 | 5.57E-24  | 0.81 |
| 29755 | 170776 | 171143 | 1.85E-52  | 0.93 |
| 29755 | 171928 | 173193 | 2.63E-155 | 0.91 |
| 29755 | 175206 | 175840 | 6.61E-35  | 0.82 |
| 29755 | 191926 | 192314 | 2.08E-13  | 0.61 |
| 29755 | 225613 | 225992 | 3.57E-56  | 0.93 |
| 29755 | 260630 | 261249 | 5.52E-16  | 0.75 |
| 29755 | 261584 | 261986 | 2.88E-37  | 0.8  |
| 29755 | 264086 | 264297 | 1.55E-15  | 0.74 |
| 29755 | 278192 | 278909 | 3.52E-08  | 0.81 |
| 29755 | 294000 | 294363 | 2.87E-35  | 0.97 |
| 29756 | 17010  | 17664  | 2.04E-14  | 0.81 |
| 29756 | 20208  | 20998  | 8.59E-33  | 0.74 |
| 29756 | 25824  | 26070  | 9.61E-11  | 0.78 |
| 29756 | 35752  | 36653  | 6.14E-36  | 0.86 |

|       |        |        |           |      |
|-------|--------|--------|-----------|------|
| 29756 | 38569  | 39127  | 4.62E-40  | 0.92 |
| 29756 | 44490  | 45061  | 4.09E-68  | 0.88 |
| 29756 | 45736  | 46294  | 7.59E-21  | 0.71 |
| 29756 | 147071 | 147401 | 3.28E-18  | 0.9  |
| 29756 | 150042 | 150383 | 2.23E-13  | 0.85 |
| 29756 | 151780 | 152034 | 9.60E-30  | 0.86 |
| 29756 | 152362 | 152610 | 4.52E-06  | 0.8  |
| 29756 | 153101 | 153785 | 3.39E-18  | 0.79 |
| 29756 | 186714 | 187016 | 3.09E-18  | 0.9  |
| 29756 | 197873 | 198206 | 9.49E-23  | 0.94 |
| 29756 | 199934 | 200251 | 1.84E-11  | 0.83 |
| 29756 | 239438 | 239807 | 1.23E-09  | 0.76 |
| 29756 | 246454 | 248161 | 1.28E-91  | 0.89 |
| 29756 | 248891 | 249642 | 1.34E-25  | 0.63 |
| 29757 | 4058   | 4627   | 7.31E-21  | 0.67 |
| 29757 | 4976   | 6245   | 1.11E-58  | 0.73 |
| 29757 | 8870   | 9225   | 1.48E-22  | 0.93 |
| 29757 | 9437   | 10901  | 5.79E-50  | 0.87 |
| 29757 | 12284  | 12550  | 1.96E-34  | 0.93 |
| 29757 | 12869  | 13486  | 1.13E-35  | 0.93 |
| 29757 | 14655  | 14906  | 5.21E-37  | 0.96 |
| 29757 | 15145  | 16813  | 1.30E-181 | 0.92 |
| 29757 | 17064  | 17454  | 1.09E-37  | 0.95 |
| 29757 | 17977  | 19402  | 1.13E-167 | 0.93 |
| 29757 | 20062  | 20614  | 1.82E-26  | 0.9  |
| 29757 | 24089  | 24959  | 9.50E-19  | 0.84 |
| 29757 | 28356  | 28891  | 1.06E-38  | 0.83 |
| 29757 | 89303  | 89843  | 7.95E-84  | 0.96 |
| 29757 | 123025 | 124248 | 7.03E-58  | 0.86 |
| 29757 | 132266 | 132843 | 1.20E-20  | 0.89 |
| 29757 | 156692 | 157224 | 8.53E-06  | 0.84 |
| 29757 | 158954 | 159386 | 1.13E-24  | 0.73 |
| 29757 | 164686 | 165007 | 1.53E-14  | 0.87 |
| 29757 | 165347 | 165692 | 9.89E-28  | 0.73 |
| 29757 | 192296 | 193401 | 5.54E-33  | 0.9  |
| 29757 | 206611 | 207126 | 4.10E-38  | 0.73 |
| 29757 | 212153 | 212795 | 2.12E-41  | 0.88 |
| 29757 | 213011 | 213327 | 3.70E-36  | 0.94 |
| 29757 | 231544 | 232132 | 1.97E-83  | 0.88 |
| 29757 | 265644 | 266091 | 1.68E-27  | 0.89 |
| 29757 | 271688 | 271916 | 4.81E-13  | 0.71 |
| 29757 | 279595 | 280034 | 6.01E-18  | 0.78 |
| 29757 | 281335 | 281815 | 8.23E-26  | 0.7  |
| 29757 | 308792 | 309273 | 2.30E-06  | 0.93 |
| 29757 | 320908 | 321434 | 2.35E-20  | 0.88 |
| 29757 | 321704 | 322013 | 3.45E-18  | 0.85 |
| 29757 | 329897 | 330648 | 1.64E-28  | 0.81 |
| 29757 | 357779 | 358427 | 1.59E-29  | 0.8  |
| 29757 | 365706 | 366053 | 5.60E-13  | 0.82 |
| 29757 | 372905 | 373138 | 1.80E-04  | 0.85 |
| 29757 | 395728 | 396009 | 4.19E-35  | 1    |
| 29758 | 19013  | 19754  | 3.44E-26  | 0.96 |
| 29758 | 20130  | 20680  | 5.73E-31  | 0.98 |



|       |        |        |           |      |
|-------|--------|--------|-----------|------|
| 29758 | 48365  | 48733  | 2.88E-49  | 0.91 |
| 29758 | 75988  | 76771  | 1.93E-50  | 0.87 |
| 29758 | 96107  | 96539  | 1.02E-115 | 0.9  |
| 29758 | 104088 | 104858 | 3.56E-53  | 0.9  |
| 29758 | 105208 | 105704 | 1.10E-31  | 0.97 |
| 29758 | 106648 | 107277 | 1.13E-51  | 0.91 |
| 29758 | 107988 | 110118 | 1.74E-93  | 0.84 |
| 29758 | 111517 | 111799 | 4.58E-11  | 0.78 |
| 29758 | 113809 | 114286 | 1.95E-05  | 0.75 |
| 29758 | 115687 | 116166 | 1.16E-21  | 0.74 |
| 29758 | 118517 | 118775 | 1.73E-15  | 0.89 |
| 29758 | 124171 | 124514 | 6.53E-38  | 0.94 |
| 29758 | 136509 | 137033 | 8.08E-68  | 0.97 |
| 29758 | 173866 | 174067 | 9.29E-16  | 0.91 |
| 29758 | 176358 | 176582 | 1.62E-24  | 0.91 |
| 29758 | 182003 | 182537 | 2.32E-07  | 0.85 |
| 29758 | 193175 | 193627 | 5.11E-90  | 0.95 |
| 29758 | 214306 | 215732 | 8.81E-33  | 0.8  |
| 29758 | 221261 | 221776 | 1.13E-40  | 0.86 |
| 29758 | 222037 | 223544 | 1.23E-121 | 0.9  |
| 29758 | 228964 | 229179 | 3.83E-15  | 0.73 |
| 29758 | 230279 | 230783 | 2.65E-24  | 0.91 |
| 29758 | 249049 | 249261 | 1.08E-75  | 0.94 |
| 29758 | 250177 | 251387 | 1.34E-125 | 0.83 |
| 29758 | 252077 | 252534 | 7.69E-43  | 0.84 |
| 29758 | 252805 | 253195 | 6.75E-52  | 0.9  |
| 29758 | 253894 | 254818 | 1.57E-61  | 0.91 |
| 29758 | 257720 | 257948 | 1.03E-22  | 0.75 |
| 29758 | 269262 | 269857 | 6.80E-26  | 0.82 |
| 29758 | 332665 | 332991 | 7.08E-30  | 0.87 |
| 29758 | 336513 | 336976 | 1.01E-16  | 0.84 |
| 29758 | 344497 | 344900 | 2.80E-12  | 0.83 |
| 29758 | 350574 | 351958 | 5.50E-86  | 0.83 |
| 29758 | 403771 | 404034 | 3.21E-13  | 0.8  |
| 29758 | 428919 | 430874 | 1.59E-62  | 0.76 |
| 29758 | 431102 | 431677 | 3.36E-46  | 0.73 |
| 29759 | 3238   | 3482   | 6.10E-11  | 0.87 |
| 29759 | 11776  | 12077  | 1.78E-66  | 0.91 |
| 29759 | 14795  | 15089  | 2.16E-19  | 0.75 |
| 29759 | 15437  | 16358  | 3.22E-54  | 0.73 |
| 29759 | 18159  | 19433  | 9.87E-44  | 0.91 |
| 29759 | 19758  | 20162  | 1.91E-64  | 0.73 |
| 29759 | 21347  | 21664  | 4.49E-23  | 0.68 |
| 29759 | 55642  | 56007  | 5.53E-19  | 0.92 |
| 29759 | 68940  | 69481  | 3.58E-46  | 0.83 |
| 29759 | 72319  | 72968  | 7.08E-24  | 0.88 |
| 29759 | 91681  | 92816  | 4.74E-51  | 0.9  |
| 29759 | 113611 | 114190 | 8.86E-28  | 0.92 |
| 29759 | 116023 | 116466 | 5.71E-16  | 0.82 |
| 29759 | 117540 | 118139 | 1.09E-55  | 0.89 |
| 29759 | 119746 | 120231 | 5.78E-37  | 0.92 |
| 29759 | 122353 | 123347 | 5.42E-53  | 0.81 |
| 29759 | 123634 | 124008 | 5.67E-54  | 0.97 |

|       |        |        |           |      |
|-------|--------|--------|-----------|------|
| 29759 | 124214 | 124752 | 1.58E-72  | 0.88 |
| 29759 | 126906 | 127225 | 2.79E-31  | 0.78 |
| 29759 | 130094 | 130417 | 1.53E-28  | 0.86 |
| 29759 | 130758 | 131541 | 8.90E-35  | 0.78 |
| 29759 | 152405 | 152872 | 6.15E-13  | 0.84 |
| 29759 | 171822 | 172292 | 3.78E-31  | 0.91 |
| 29759 | 179332 | 179836 | 1.87E-08  | 0.92 |
| 29759 | 187122 | 187908 | 8.18E-25  | 0.79 |
| 29759 | 189626 | 190111 | 6.62E-41  | 0.96 |
| 29759 | 192623 | 192960 | 2.06E-22  | 0.84 |
| 29759 | 196406 | 196620 | 2.43E-16  | 0.8  |
| 29760 | 229    | 1148   | 6.61E-27  | 0.88 |
| 29760 | 11658  | 12205  | 2.57E-04  | 0.81 |
| 29760 | 26367  | 26723  | 2.30E-05  | 1    |
| 29760 | 38552  | 38927  | 3.62E-13  | 0.93 |
| 29760 | 39603  | 39843  | 2.47E-28  | 0.8  |
| 29760 | 41549  | 41756  | 5.29E-16  | 0.88 |
| 29760 | 47354  | 48186  | 1.24E-13  | 0.82 |
| 29760 | 50651  | 51283  | 7.34E-30  | 0.89 |
| 29760 | 74889  | 75394  | 2.43E-11  | 0.92 |
| 29760 | 85116  | 86490  | 2.97E-27  | 0.63 |
| 29760 | 87368  | 87949  | 5.53E-17  | 0.91 |
| 29760 | 102114 | 103325 | 2.28E-43  | 0.94 |
| 29760 | 135337 | 135685 | 2.07E-15  | 0.95 |
| 29760 | 135980 | 136226 | 5.61E-06  | 0.88 |
| 29760 | 146962 | 147288 | 1.47E-12  | 0.9  |
| 29760 | 163680 | 163942 | 3.60E-297 | 0.82 |
| 29760 | 195885 | 198450 | 7.35E-33  | 0.73 |
| 29760 | 239088 | 239604 | 2.00E-38  | 0.95 |
| 29760 | 256696 | 257071 | 1.93E-31  | 0.96 |
| 29760 | 263874 | 264416 | 3.11E-32  | 0.8  |
| 29760 | 274321 | 274793 | 1.09E-05  | 0.88 |
| 29760 | 279310 | 279676 | 4.86E-05  | 0.92 |
| 29760 | 282819 | 283538 | 2.04E-18  | 0.86 |
| 29760 | 284050 | 284419 | 7.73E-09  | 0.88 |
| 29760 | 284508 | 284748 | 1.08E-05  | 0.84 |
| 29760 | 292385 | 292664 | 4.26E-05  | 0.83 |
| 29760 | 312794 | 313366 | 1.66E-14  | 0.89 |
| 29760 | 318847 | 319174 | 4.25E-08  | 0.78 |
| 29760 | 320008 | 320444 | 1.86E-11  | 0.81 |
| 29761 | 1135   | 1809   | 1.65E-14  | 0.8  |
| 29761 | 4127   | 5007   | 2.15E-36  | 0.8  |
| 29761 | 5250   | 6035   | 9.02E-80  | 0.86 |
| 29761 | 8150   | 8889   | 4.06E-52  | 0.81 |
| 29761 | 34084  | 34696  | 2.30E-55  | 0.64 |
| 29761 | 34912  | 35143  | 1.52E-25  | 0.8  |
| 29761 | 40341  | 40971  | 3.75E-26  | 0.89 |
| 29761 | 48664  | 48911  | 5.32E-24  | 0.95 |
| 29761 | 49791  | 50350  | 1.01E-28  | 0.8  |
| 29761 | 50634  | 50903  | 2.11E-19  | 0.8  |
| 29761 | 52756  | 53372  | 5.88E-17  | 0.87 |
| 29761 | 57958  | 58464  | 1.58E-44  | 0.75 |
| 29761 | 60754  | 61538  | 6.11E-73  | 0.87 |

|       |        |        |           |      |
|-------|--------|--------|-----------|------|
| 29761 | 72151  | 72968  | 5.02E-37  | 0.83 |
| 29761 | 73531  | 73797  | 6.08E-13  | 0.81 |
| 29761 | 99038  | 99422  | 1.77E-38  | 0.82 |
| 29761 | 112881 | 113289 | 2.14E-15  | 0.86 |
| 29761 | 143771 | 144351 | 1.60E-21  | 0.86 |
| 29761 | 148807 | 149367 | 1.18E-38  | 0.92 |
| 29761 | 189234 | 189662 | 4.97E-17  | 0.8  |
| 29761 | 197537 | 197874 | 2.48E-16  | 0.78 |
| 29761 | 211906 | 212113 | 7.38E-20  | 0.87 |
| 29762 | 12511  | 12955  | 2.58E-32  | 0.88 |
| 29762 | 16708  | 17570  | 6.39E-58  | 0.9  |
| 29762 | 19702  | 20776  | 5.37E-60  | 0.93 |
| 29762 | 25073  | 25494  | 1.54E-19  | 0.75 |
| 29762 | 57368  | 57722  | 1.76E-30  | 0.98 |
| 29762 | 79009  | 79500  | 3.60E-32  | 0.88 |
| 29762 | 85005  | 86086  | 3.17E-93  | 0.91 |
| 29762 | 87205  | 87696  | 1.09E-41  | 0.91 |
| 29762 | 102688 | 103083 | 2.07E-91  | 0.93 |
| 29762 | 103404 | 104256 | 4.79E-112 | 0.92 |
| 29762 | 104487 | 104843 | 1.50E-19  | 0.81 |
| 29762 | 112390 | 112822 | 2.06E-27  | 0.66 |
| 29762 | 136316 | 137630 | 9.32E-39  | 0.73 |
| 29762 | 175320 | 176161 | 1.17E-28  | 0.77 |
| 29762 | 184571 | 184870 | 5.73E-20  | 0.96 |
| 29762 | 201595 | 202230 | 1.78E-29  | 0.79 |
| 29762 | 202459 | 202761 | 6.37E-21  | 0.77 |
| 29763 | 6888   | 7311   | 1.56E-27  | 0.9  |
| 29763 | 8908   | 9330   | 2.34E-27  | 0.84 |
| 29763 | 16205  | 17872  | 1.10E-48  | 0.9  |
| 29763 | 29822  | 30082  | 2.71E-37  | 0.86 |
| 29763 | 33012  | 33534  | 3.46E-47  | 0.87 |
| 29763 | 51842  | 52112  | 1.46E-31  | 0.9  |
| 29763 | 54909  | 55327  | 3.55E-09  | 0.75 |
| 29763 | 57476  | 57748  | 5.88E-15  | 0.82 |
| 29763 | 72270  | 73044  | 2.46E-72  | 0.85 |
| 29763 | 73355  | 74238  | 1.88E-89  | 0.91 |
| 29763 | 77071  | 78154  | 4.96E-29  | 0.83 |
| 29763 | 84576  | 85739  | 4.36E-85  | 0.95 |
| 29763 | 86245  | 86621  | 8.69E-40  | 0.96 |
| 29763 | 87451  | 88149  | 4.21E-62  | 0.95 |
| 29763 | 102238 | 102493 | 2.73E-18  | 0.85 |
| 29763 | 105457 | 105905 | 1.58E-09  | 0.85 |
| 29763 | 136707 | 137110 | 6.12E-28  | 0.91 |
| 29764 | 39148  | 39368  | 2.87E-06  | 0.7  |
| 29764 | 62144  | 62396  | 3.44E-17  | 0.93 |
| 29764 | 66927  | 67409  | 2.59E-05  | 0.94 |
| 29764 | 68641  | 68871  | 8.16E-04  | 1    |
| 29764 | 139730 | 140818 | 8.02E-40  | 0.81 |
| 29764 | 200839 | 201118 | 1.73E-17  | 0.92 |
| 29764 | 214142 | 214351 | 1.87E-24  | 0.96 |
| 29764 | 242952 | 243425 | 2.14E-16  | 0.82 |
| 29764 | 246765 | 247115 | 1.86E-17  | 0.79 |
| 29764 | 247968 | 248252 | 1.83E-26  | 1    |

|       |        |        |           |      |
|-------|--------|--------|-----------|------|
| 29764 | 336006 | 336574 | 9.62E-22  | 0.91 |
| 29764 | 352553 | 352897 | 3.16E-11  | 0.9  |
| 29764 | 376749 | 377442 | 1.31E-29  | 0.75 |
| 29764 | 444838 | 445628 | 8.44E-56  | 0.96 |
| 29764 | 456327 | 456946 | 8.94E-33  | 0.88 |
| 29764 | 498318 | 498698 | 4.74E-43  | 0.85 |
| 29764 | 500648 | 501062 | 4.05E-19  | 0.98 |
| 29764 | 505778 | 506235 | 3.67E-51  | 0.92 |
| 29764 | 590993 | 591212 | 3.12E-57  | 0.96 |
| 29764 | 591454 | 592896 | 7.21E-90  | 0.62 |
| 29764 | 605025 | 605251 | 1.71E-13  | 0.92 |
| 29764 | 646622 | 647825 | 1.16E-92  | 0.93 |
| 29764 | 661737 | 663085 | 1.48E-50  | 0.8  |
| 29764 | 668821 | 669177 | 2.19E-16  | 0.89 |
| 29764 | 669793 | 670153 | 6.17E-12  | 0.94 |
| 29764 | 694132 | 694348 | 3.34E-11  | 0.86 |
| 29765 | 6162   | 7174   | 4.87E-34  | 0.8  |
| 29765 | 17335  | 20510  | 3.00E-224 | 0.86 |
| 29765 | 24743  | 25190  | 3.60E-24  | 0.82 |
| 29765 | 43884  | 44165  | 1.43E-27  | 0.82 |
| 29765 | 44420  | 44849  | 1.98E-27  | 0.96 |
| 29765 | 45126  | 45376  | 4.31E-37  | 0.96 |
| 29765 | 46185  | 46795  | 8.89E-30  | 0.9  |
| 29765 | 48271  | 48786  | 7.82E-30  | 0.86 |
| 29765 | 49720  | 50457  | 1.02E-45  | 0.8  |
| 29765 | 51757  | 52085  | 6.26E-30  | 0.95 |
| 29765 | 52757  | 53227  | 8.60E-50  | 0.72 |
| 29765 | 56635  | 56976  | 3.55E-10  | 0.64 |
| 29765 | 67057  | 67814  | 5.90E-34  | 0.68 |
| 29765 | 74167  | 74535  | 2.74E-13  | 0.76 |
| 29765 | 82105  | 82653  | 2.68E-13  | 0.79 |
| 29765 | 106444 | 107470 | 2.61E-78  | 0.65 |
| 29765 | 111938 | 112748 | 2.42E-38  | 0.77 |
| 29765 | 141714 | 144521 | 3.05E-115 | 0.84 |
| 29765 | 155474 | 156054 | 1.12E-18  | 0.77 |
| 29765 | 161413 | 163203 | 2.07E-80  | 0.88 |
| 29765 | 163421 | 163709 | 4.94E-09  | 0.64 |
| 29765 | 166983 | 167289 | 1.91E-21  | 0.79 |
| 29765 | 193825 | 194354 | 2.73E-57  | 0.87 |
| 29765 | 195769 | 196983 | 3.03E-98  | 0.88 |
| 29765 | 199737 | 200235 | 1.56E-19  | 0.73 |
| 29765 | 211094 | 212214 | 1.73E-53  | 0.81 |
| 29765 | 214768 | 215647 | 3.17E-22  | 0.68 |
| 29765 | 215863 | 216236 | 2.93E-23  | 0.77 |
| 29765 | 226833 | 228730 | 1.11E-61  | 0.63 |
| 29765 | 232555 | 233389 | 7.38E-18  | 0.88 |
| 29765 | 234812 | 235017 | 1.44E-09  | 0.79 |
| 29765 | 267713 | 268110 | 1.67E-15  | 0.8  |
| 29765 | 287617 | 287906 | 1.70E-12  | 0.8  |
| 29765 | 287754 | 288077 | 1.40E-11  | 0.78 |
| 29765 | 288746 | 290588 | 1.35E-86  | 0.81 |
| 29765 | 293190 | 293581 | 7.52E-24  | 0.95 |
| 29765 | 294668 | 295308 | 1.20E-36  | 0.92 |

|       |        |        |           |      |
|-------|--------|--------|-----------|------|
| 29765 | 332694 | 333045 | 4.84E-06  | 0.97 |
| 29765 | 339113 | 339697 | 1.47E-06  | 0.77 |
| 29765 | 345693 | 345925 | 9.06E-20  | 0.76 |
| 29765 | 347036 | 347388 | 3.26E-19  | 0.79 |
| 29765 | 349761 | 350249 | 3.64E-14  | 0.78 |
| 29766 | 8684   | 9549   | 6.69E-48  | 0.84 |
| 29766 | 82431  | 83113  | 4.87E-59  | 0.91 |
| 29766 | 83406  | 83892  | 2.55E-53  | 0.97 |
| 29766 | 84476  | 85027  | 3.37E-77  | 0.95 |
| 29766 | 101628 | 102111 | 1.77E-11  | 0.64 |
| 29767 | 28017  | 29543  | 3.29E-109 | 0.69 |
| 29767 | 49115  | 49613  | 2.21E-14  | 0.82 |
| 29767 | 49932  | 51205  | 1.61E-67  | 0.87 |
| 29767 | 67784  | 68095  | 2.44E-16  | 0.7  |
| 29767 | 89425  | 90174  | 2.04E-38  | 0.87 |
| 29767 | 97292  | 97976  | 1.42E-21  | 0.77 |
| 29767 | 110236 | 111058 | 1.27E-17  | 0.78 |
| 29768 | 15378  | 16013  | 4.11E-25  | 0.74 |
| 29768 | 20625  | 21228  | 1.69E-33  | 0.95 |
| 29768 | 46750  | 47558  | 1.76E-56  | 0.97 |
| 29768 | 66115  | 66851  | 9.17E-21  | 0.86 |
| 29768 | 71406  | 72066  | 5.19E-25  | 0.89 |
| 29768 | 73373  | 73604  | 2.28E-63  | 0.93 |
| 29768 | 75622  | 76506  | 2.68E-46  | 0.76 |
| 29769 | 5972   | 6412   | 2.57E-30  | 0.86 |
| 29769 | 15332  | 15682  | 1.31E-10  | 0.93 |
| 29769 | 18257  | 19142  | 4.90E-77  | 0.82 |
| 29769 | 19408  | 20531  | 2.45E-67  | 0.92 |
| 29769 | 22020  | 22741  | 9.14E-51  | 0.88 |
| 29769 | 44185  | 44851  | 2.93E-34  | 0.86 |
| 29769 | 65161  | 65415  | 3.76E-05  | 1    |
| 29769 | 78578  | 79358  | 1.18E-47  | 0.89 |
| 29769 | 81843  | 83274  | 1.42E-50  | 0.88 |
| 29769 | 83723  | 83976  | 6.57E-22  | 0.83 |
| 29769 | 85017  | 85255  | 3.99E-17  | 0.78 |
| 29769 | 87436  | 88295  | 7.07E-92  | 0.88 |
| 29769 | 119564 | 119910 | 1.16E-42  | 0.89 |
| 29769 | 139168 | 139947 | 2.16E-74  | 0.91 |
| 29769 | 141895 | 142465 | 7.96E-66  | 0.88 |
| 29769 | 183940 | 184399 | 5.27E-17  | 0.83 |
| 29769 | 208214 | 208618 | 1.97E-07  | 0.8  |
| 29769 | 213580 | 214088 | 2.07E-27  | 0.93 |
| 29769 | 221288 | 221488 | 8.06E-14  | 0.92 |
| 29769 | 231531 | 231743 | 1.44E-08  | 0.79 |
| 29769 | 239804 | 240064 | 8.50E-12  | 0.86 |
| 29769 | 291187 | 291401 | 5.13E-06  | 0.85 |
| 29769 | 295071 | 295287 | 3.41E-07  | 0.86 |
| 29769 | 314414 | 315102 | 7.67E-40  | 0.79 |
| 29769 | 316095 | 316458 | 3.06E-25  | 0.92 |
| 29769 | 332873 | 333377 | 4.52E-25  | 0.83 |
| 29769 | 339320 | 339885 | 4.38E-16  | 0.88 |
| 29769 | 345432 | 345854 | 1.05E-28  | 0.93 |
| 29769 | 368166 | 368524 | 2.90E-23  | 0.95 |

|       |        |        |           |      |
|-------|--------|--------|-----------|------|
| 29770 | 1599   | 1948   | 2.28E-04  | 0.89 |
| 29770 | 88096  | 88705  | 9.84E-54  | 0.95 |
| 29770 | 136493 | 137174 | 1.75E-51  | 0.9  |
| 29770 | 153421 | 153732 | 3.90E-11  | 0.83 |
| 29770 | 153440 | 153804 | 9.97E-11  | 0.82 |
| 29770 | 167547 | 167878 | 2.88E-11  | 0.63 |
| 29770 | 177401 | 177713 | 1.53E-19  | 0.92 |
| 29770 | 235139 | 235446 | 3.83E-39  | 0.87 |
| 29770 | 238398 | 238963 | 2.04E-33  | 0.93 |
| 29770 | 266585 | 266929 | 4.19E-09  | 0.81 |
| 29771 | 14872  | 15419  | 1.29E-46  | 0.93 |
| 29771 | 19788  | 20050  | 1.32E-41  | 0.98 |
| 29772 | 10173  | 10608  | 3.93E-54  | 0.87 |
| 29772 | 11049  | 11678  | 2.13E-38  | 0.9  |
| 29772 | 12558  | 13451  | 1.53E-76  | 0.73 |
| 29772 | 24436  | 24682  | 9.26E-23  | 0.83 |
| 29772 | 26121  | 26731  | 2.82E-37  | 0.87 |
| 29772 | 33113  | 33524  | 3.38E-18  | 0.88 |
| 29772 | 34309  | 34528  | 8.90E-08  | 0.93 |
| 29772 | 88026  | 88771  | 4.39E-26  | 0.79 |
| 29772 | 89773  | 90281  | 1.44E-22  | 0.71 |
| 29772 | 91134  | 92175  | 1.19E-66  | 0.7  |
| 29772 | 126863 | 127360 | 1.81E-18  | 0.87 |
| 29772 | 133463 | 133851 | 5.27E-18  | 0.7  |
| 29772 | 134378 | 136359 | 1.66E-75  | 0.7  |
| 29773 | 17515  | 17740  | 3.94E-04  | 0.74 |
| 29773 | 26444  | 27446  | 2.54E-39  | 0.82 |
| 29773 | 31087  | 31479  | 1.81E-48  | 0.88 |
| 29773 | 50769  | 50991  | 1.44E-16  | 0.69 |
| 29773 | 63117  | 63464  | 4.24E-28  | 0.86 |
| 29773 | 77329  | 78152  | 4.19E-39  | 0.81 |
| 29773 | 78411  | 79833  | 7.84E-97  | 0.83 |
| 29773 | 82703  | 83015  | 7.38E-16  | 0.82 |
| 29773 | 83415  | 85571  | 4.08E-110 | 0.8  |
| 29773 | 106930 | 107346 | 1.06E-25  | 0.84 |
| 29773 | 108297 | 108544 | 2.78E-34  | 0.89 |
| 29773 | 111571 | 111966 | 1.28E-33  | 0.82 |
| 29773 | 115079 | 115795 | 4.03E-71  | 0.92 |
| 29773 | 139645 | 139967 | 7.77E-14  | 0.81 |
| 29773 | 141679 | 143704 | 3.17E-93  | 0.84 |
| 29774 | 39982  | 40195  | 3.68E-04  | 0.87 |
| 29775 | 9180   | 9826   | 2.37E-45  | 0.77 |
| 29775 | 44425  | 44778  | 1.68E-13  | 0.83 |
| 29775 | 63831  | 64394  | 6.95E-46  | 0.83 |
| 29775 | 66280  | 66920  | 3.84E-76  | 0.82 |
| 29775 | 67392  | 70082  | 2.20E-126 | 0.83 |
| 29776 | 51387  | 52583  | 8.02E-34  | 0.77 |
| 29776 | 60407  | 61042  | 2.59E-22  | 0.75 |
| 29776 | 65399  | 65834  | 2.19E-17  | 0.8  |
| 29776 | 66261  | 66777  | 1.87E-23  | 0.76 |
| 29776 | 76255  | 76960  | 7.75E-46  | 0.82 |
| 29776 | 81889  | 82104  | 2.49E-22  | 0.87 |
| 29776 | 102491 | 102794 | 1.17E-12  | 0.86 |

|       |        |        |           |      |
|-------|--------|--------|-----------|------|
| 29776 | 170955 | 171458 | 8.43E-37  | 0.89 |
| 29776 | 172083 | 173202 | 4.93E-42  | 0.86 |
| 29776 | 174519 | 174835 | 5.42E-18  | 0.88 |
| 29776 | 182956 | 184114 | 1.07E-42  | 0.85 |
| 29776 | 188841 | 189423 | 1.12E-98  | 0.87 |
| 29776 | 189695 | 190051 | 3.70E-23  | 0.86 |
| 29776 | 190385 | 190685 | 1.04E-44  | 0.95 |
| 29776 | 191497 | 192561 | 6.02E-67  | 0.94 |
| 29776 | 193680 | 194098 | 4.13E-50  | 0.89 |
| 29776 | 195199 | 195888 | 1.25E-31  | 0.84 |
| 29776 | 197849 | 198414 | 3.88E-40  | 0.9  |
| 29776 | 198753 | 199715 | 1.51E-53  | 0.75 |
| 29776 | 204082 | 204378 | 5.72E-21  | 0.9  |
| 29776 | 205466 | 205964 | 5.43E-46  | 0.89 |
| 29776 | 208733 | 209138 | 6.29E-36  | 0.85 |
| 29777 | 13006  | 14294  | 1.04E-89  | 0.77 |
| 29777 | 84810  | 85403  | 6.67E-209 | 0.92 |
| 29777 | 103072 | 103593 | 1.64E-56  | 0.95 |
| 29777 | 105143 | 105371 | 3.61E-98  | 0.95 |
| 29777 | 105744 | 106623 | 1.18E-79  | 0.92 |
| 29777 | 113753 | 114121 | 1.78E-14  | 0.71 |
| 29777 | 114409 | 114917 | 1.12E-19  | 0.9  |
| 29777 | 123088 | 124107 | 9.00E-39  | 0.8  |
| 29777 | 146236 | 146470 | 7.61E-07  | 0.95 |
| 29777 | 164579 | 165524 | 2.12E-13  | 0.63 |
| 29778 | 6307   | 7080   | 1.99E-24  | 0.78 |
| 29778 | 10475  | 11298  | 3.62E-26  | 0.78 |
| 29778 | 27273  | 28306  | 9.40E-68  | 0.62 |
| 29778 | 29595  | 30150  | 2.08E-17  | 0.76 |
| 29779 | 37752  | 38088  | 5.20E-10  | 0.96 |
| 29779 | 43704  | 44849  | 2.22E-75  | 0.9  |
| 29779 | 45123  | 45379  | 1.34E-11  | 0.82 |
| 29779 | 69659  | 70136  | 2.70E-03  | 0.89 |
| 29779 | 130889 | 131105 | 6.89E-04  | 0.77 |
| 29779 | 147808 | 148371 | 2.87E-05  | 0.94 |
| 29779 | 161566 | 161826 | 6.61E-08  | 0.83 |
| 29779 | 210385 | 211134 | 1.27E-62  | 0.8  |
| 29779 | 242794 | 243047 | 7.85E-14  | 0.87 |
| 29779 | 302194 | 303030 | 1.80E-26  | 0.83 |
| 29779 | 308580 | 309152 | 3.58E-17  | 0.74 |
| 29779 | 309375 | 309623 | 2.08E-10  | 0.81 |
| 29779 | 312691 | 313713 | 2.42E-68  | 0.93 |
| 29780 | 5322   | 5853   | 1.26E-11  | 0.79 |
| 29780 | 43428  | 43912  | 2.12E-24  | 0.83 |
| 29780 | 49657  | 50951  | 3.65E-55  | 0.85 |
| 29780 | 77421  | 77807  | 6.17E-18  | 0.87 |
| 29780 | 80754  | 81180  | 3.42E-12  | 0.8  |
| 29780 | 161490 | 161709 | 5.64E-23  | 0.98 |
| 29780 | 233219 | 233719 | 1.26E-20  | 0.83 |
| 29780 | 233332 | 233776 | 2.44E-20  | 0.81 |
| 29780 | 251539 | 252085 | 4.24E-40  | 0.89 |
| 29780 | 287582 | 288426 | 1.18E-27  | 0.73 |
| 29780 | 303176 | 303381 | 1.48E-16  | 0.9  |

|       |        |        |           |      |
|-------|--------|--------|-----------|------|
| 29780 | 317290 | 317633 | 8.28E-39  | 0.92 |
| 29780 | 356326 | 357448 | 4.68E-79  | 0.82 |
| 29780 | 396951 | 397396 | 7.07E-05  | 0.86 |
| 29780 | 401582 | 401847 | 7.06E-12  | 0.79 |
| 29780 | 440068 | 440911 | 1.03E-32  | 0.77 |
| 29780 | 441643 | 441912 | 2.79E-23  | 0.74 |
| 29780 | 447957 | 449408 | 4.88E-58  | 0.63 |
| 29780 | 473081 | 473504 | 5.00E-23  | 0.83 |
| 29780 | 482537 | 482793 | 2.92E-14  | 0.85 |
| 29780 | 495970 | 496777 | 6.33E-22  | 0.73 |
| 29780 | 497203 | 497950 | 7.81E-30  | 0.79 |
| 29780 | 498196 | 498439 | 7.23E-73  | 0.94 |
| 29780 | 498714 | 499423 | 6.34E-57  | 0.9  |
| 29780 | 499627 | 500891 | 1.27E-135 | 0.92 |
| 29780 | 514514 | 515324 | 2.98E-52  | 0.6  |
| 29780 | 515542 | 516064 | 4.75E-25  | 0.73 |
| 29780 | 523026 | 523959 | 1.29E-85  | 0.76 |
| 29780 | 524320 | 524801 | 2.00E-39  | 0.87 |
| 29780 | 529141 | 531277 | 9.87E-65  | 0.67 |
| 29780 | 633950 | 634941 | 7.26E-21  | 0.78 |
| 29780 | 644817 | 645286 | 2.89E-19  | 0.85 |
| 29780 | 646096 | 646676 | 2.37E-75  | 0.9  |
| 29780 | 647748 | 647972 | 8.74E-44  | 0.77 |
| 29781 | 1699   | 1997   | 4.79E-19  | 0.65 |
| 29781 | 2892   | 3374   | 1.02E-21  | 0.81 |
| 29782 | 25960  | 26253  | 3.39E-20  | 0.74 |
| 29782 | 28572  | 29361  | 3.66E-73  | 0.92 |
| 29782 | 29816  | 30138  | 9.83E-58  | 0.81 |
| 29782 | 30346  | 31338  | 4.87E-27  | 0.69 |
| 29782 | 33113  | 33379  | 2.63E-13  | 0.91 |
| 29782 | 35780  | 36323  | 3.87E-17  | 0.74 |
| 29782 | 69182  | 69815  | 3.65E-30  | 0.8  |
| 29783 | 14775  | 14985  | 1.76E-16  | 0.89 |
| 29783 | 25384  | 25689  | 2.07E-19  | 0.76 |
| 29783 | 26046  | 27040  | 1.43E-67  | 0.89 |
| 29783 | 27690  | 28377  | 2.00E-20  | 0.8  |
| 29783 | 63399  | 64112  | 7.46E-55  | 0.95 |
| 29783 | 81634  | 82434  | 3.33E-130 | 0.92 |
| 29783 | 83294  | 83687  | 4.61E-36  | 0.95 |
| 29783 | 95945  | 96275  | 2.38E-06  | 0.67 |
| 29783 | 160996 | 161384 | 3.04E-18  | 0.72 |
| 29783 | 178843 | 179065 | 8.82E-23  | 0.95 |
| 29783 | 179562 | 179793 | 6.71E-10  | 0.71 |
| 29783 | 213614 | 214906 | 2.99E-50  | 0.77 |
| 29783 | 224354 | 225330 | 4.31E-42  | 0.81 |
| 29783 | 249827 | 250387 | 1.43E-33  | 0.82 |
| 29784 | 25929  | 26454  | 2.37E-26  | 0.66 |
| 29784 | 67204  | 68587  | 1.09E-25  | 0.69 |
| 29784 | 68833  | 69225  | 8.28E-32  | 0.88 |
| 29784 | 89384  | 90868  | 2.00E-84  | 0.85 |
| 29784 | 133573 | 133792 | 1.33E-58  | 0.82 |
| 29784 | 134471 | 134849 | 5.82E-69  | 0.84 |
| 29784 | 135119 | 135795 | 1.72E-33  | 0.91 |



|       |        |        |           |      |
|-------|--------|--------|-----------|------|
| 29784 | 143013 | 144993 | 1.31E-106 | 0.8  |
| 29784 | 150311 | 150659 | 2.85E-20  | 0.83 |
| 29784 | 156385 | 157155 | 9.69E-69  | 0.61 |
| 29784 | 157361 | 157983 | 5.29E-47  | 0.95 |
| 29784 | 178823 | 179557 | 6.61E-40  | 0.89 |
| 29785 | 2073   | 2396   | 2.50E-07  | 0.67 |
| 29785 | 3746   | 4505   | 1.96E-68  | 0.64 |
| 29785 | 8640   | 9124   | 4.07E-44  | 0.83 |
| 29785 | 11266  | 11558  | 3.79E-12  | 0.63 |
| 29785 | 23727  | 24297  | 5.53E-39  | 0.67 |
| 29785 | 27040  | 27349  | 4.07E-06  | 0.82 |
| 29785 | 33500  | 33758  | 1.01E-09  | 0.88 |
| 29785 | 43571  | 44318  | 2.28E-12  | 0.63 |
| 29785 | 88105  | 88971  | 5.34E-75  | 0.82 |
| 29785 | 99084  | 99609  | 1.82E-14  | 0.66 |
| 29785 | 110762 | 111079 | 4.52E-20  | 0.96 |
| 29785 | 122013 | 122434 | 4.19E-20  | 0.81 |
| 29785 | 122771 | 124205 | 6.69E-57  | 0.89 |
| 29785 | 124427 | 124790 | 5.67E-36  | 0.81 |
| 29785 | 198982 | 199355 | 1.48E-17  | 0.95 |
| 29785 | 211399 | 211773 | 8.97E-27  | 0.72 |
| 29785 | 231789 | 232164 | 1.93E-14  | 0.81 |
| 29785 | 235452 | 236821 | 4.08E-42  | 0.86 |
| 29785 | 240716 | 240961 | 4.17E-17  | 0.88 |
| 29785 | 246015 | 246309 | 5.16E-52  | 0.88 |
| 29785 | 250766 | 251427 | 1.85E-35  | 0.9  |
| 29785 | 262570 | 263198 | 2.81E-40  | 0.87 |
| 29785 | 266406 | 267097 | 2.77E-16  | 0.75 |
| 29785 | 272298 | 272568 | 2.54E-14  | 0.8  |
| 29785 | 279664 | 279949 | 4.65E-22  | 0.75 |
| 29785 | 310274 | 310837 | 7.22E-07  | 0.64 |
| 29785 | 313549 | 314347 | 1.73E-12  | 0.71 |
| 29785 | 329888 | 330536 | 3.35E-16  | 0.78 |
| 29785 | 330609 | 330957 | 2.71E-13  | 0.79 |
| 29785 | 335298 | 335547 | 2.43E-28  | 0.78 |
| 29785 | 351719 | 352152 | 7.83E-12  | 0.74 |
| 29785 | 371602 | 372182 | 5.51E-36  | 0.76 |
| 29785 | 372451 | 373045 | 8.77E-26  | 0.83 |
| 29785 | 373286 | 373805 | 3.76E-74  | 0.92 |
| 29785 | 374073 | 375883 | 1.19E-92  | 0.74 |
| 29785 | 391939 | 392179 | 3.28E-22  | 0.85 |
| 29785 | 403714 | 404070 | 5.73E-18  | 0.87 |
| 29785 | 405677 | 406191 | 1.74E-28  | 0.86 |
| 29785 | 411726 | 412347 | 2.56E-34  | 0.68 |
| 29785 | 420659 | 421164 | 1.80E-45  | 0.86 |
| 29785 | 421725 | 422494 | 7.60E-32  | 0.69 |
| 29785 | 436918 | 437313 | 6.50E-18  | 0.8  |
| 29785 | 496187 | 496470 | 2.17E-32  | 0.83 |
| 29785 | 497183 | 498576 | 1.04E-104 | 0.7  |
| 29785 | 504654 | 505788 | 2.20E-64  | 0.88 |
| 29785 | 517660 | 518241 | 1.04E-18  | 0.77 |
| 29785 | 524357 | 524644 | 5.69E-12  | 0.87 |
| 29785 | 524924 | 525249 | 1.08E-09  | 0.78 |

|       |        |        |           |      |
|-------|--------|--------|-----------|------|
| 29785 | 525544 | 525995 | 1.24E-29  | 0.97 |
| 29785 | 526355 | 527011 | 2.91E-27  | 0.96 |
| 29785 | 527320 | 528492 | 1.84E-95  | 0.87 |
| 29786 | 9451   | 9913   | 5.48E-22  | 0.94 |
| 29786 | 10635  | 11837  | 1.14E-38  | 0.87 |
| 29786 | 20336  | 20747  | 8.32E-77  | 0.88 |
| 29786 | 41201  | 42917  | 9.25E-59  | 0.85 |
| 29786 | 43171  | 43390  | 5.17E-17  | 0.89 |
| 29786 | 45529  | 46655  | 2.29E-76  | 0.93 |
| 29786 | 50788  | 52125  | 3.85E-55  | 0.92 |
| 29786 | 52397  | 54320  | 2.80E-55  | 0.82 |
| 29787 | 7444   | 7685   | 7.23E-05  | 0.78 |
| 29788 | 9095   | 9689   | 5.38E-17  | 0.61 |
| 29788 | 32334  | 33094  | 1.28E-09  | 0.73 |
| 29788 | 43957  | 44540  | 3.18E-32  | 0.85 |
| 29788 | 56449  | 57127  | 1.43E-36  | 0.81 |
| 29788 | 80477  | 81281  | 1.73E-17  | 0.66 |
| 29788 | 89359  | 89661  | 1.51E-12  | 0.89 |
| 29788 | 91503  | 92230  | 5.17E-43  | 0.86 |
| 29788 | 92442  | 93444  | 5.10E-28  | 0.78 |
| 29788 | 112644 | 112912 | 3.69E-06  | 0.64 |
| 29789 | 1393   | 1778   | 1.07E-07  | 0.88 |
| 29789 | 14404  | 14648  | 2.70E-13  | 0.85 |
| 29789 | 17408  | 17772  | 7.87E-18  | 0.98 |
| 29789 | 43441  | 43785  | 2.46E-18  | 0.8  |
| 29789 | 66038  | 66517  | 5.04E-36  | 0.98 |
| 29789 | 75153  | 75381  | 3.23E-06  | 0.89 |
| 29789 | 76557  | 76930  | 1.40E-08  | 0.94 |
| 29790 | 12019  | 12346  | 2.83E-19  | 0.78 |
| 29790 | 35677  | 37383  | 3.28E-50  | 0.86 |
| 29790 | 107321 | 108115 | 1.07E-51  | 0.88 |
| 29790 | 110052 | 110276 | 1.07E-52  | 0.91 |
| 29790 | 132626 | 132891 | 1.33E-19  | 0.6  |
| 29790 | 140910 | 141322 | 5.23E-33  | 0.9  |
| 29790 | 141553 | 141975 | 6.15E-18  | 0.81 |
| 29790 | 162582 | 163317 | 3.05E-33  | 0.82 |
| 29790 | 166846 | 167832 | 1.87E-26  | 0.72 |
| 29790 | 246208 | 246715 | 1.37E-49  | 0.68 |
| 29790 | 254426 | 254796 | 5.46E-07  | 0.62 |
| 29790 | 326297 | 327130 | 1.44E-32  | 0.76 |
| 29790 | 354066 | 354957 | 1.31E-62  | 0.9  |
| 29790 | 355618 | 355884 | 1.74E-23  | 0.89 |
| 29790 | 363159 | 364344 | 2.72E-76  | 0.89 |
| 29790 | 365056 | 366301 | 1.02E-69  | 0.92 |
| 29790 | 373428 | 374632 | 5.54E-100 | 0.65 |
| 29791 | 6504   | 7413   | 9.90E-63  | 0.63 |
| 29791 | 20801  | 21726  | 4.98E-26  | 0.79 |
| 29791 | 24254  | 24508  | 1.20E-14  | 0.65 |
| 29791 | 53708  | 53915  | 1.27E-44  | 0.92 |
| 29791 | 54780  | 55042  | 4.77E-42  | 0.86 |
| 29791 | 55254  | 55998  | 5.50E-79  | 0.88 |
| 29791 | 56252  | 56990  | 3.67E-33  | 0.86 |
| 29791 | 57579  | 58121  | 1.87E-75  | 0.92 |

|       |        |        |           |      |
|-------|--------|--------|-----------|------|
| 29791 | 77571  | 77857  | 1.33E-10  | 0.81 |
| 29791 | 104681 | 105252 | 1.42E-53  | 0.91 |
| 29791 | 110498 | 111504 | 9.91E-32  | 0.81 |
| 29791 | 114693 | 115474 | 1.68E-24  | 0.78 |
| 29791 | 119219 | 120384 | 5.01E-35  | 0.73 |
| 29791 | 133491 | 133694 | 1.72E-14  | 0.77 |
| 29791 | 146819 | 147245 | 4.91E-15  | 0.8  |
| 29791 | 148057 | 149473 | 1.06E-41  | 0.83 |
| 29791 | 150124 | 150753 | 4.32E-30  | 0.86 |
| 29791 | 151024 | 151385 | 9.34E-31  | 0.82 |
| 29791 | 160880 | 161107 | 3.92E-10  | 0.79 |
| 29791 | 171358 | 172340 | 1.76E-68  | 0.87 |
| 29791 | 186568 | 187199 | 4.95E-87  | 0.87 |
| 29791 | 188061 | 188636 | 1.76E-28  | 0.86 |
| 29791 | 188964 | 190457 | 2.35E-104 | 0.89 |
| 29791 | 208866 | 209215 | 5.06E-17  | 0.78 |
| 29792 | 16521  | 17186  | 1.91E-31  | 0.71 |
| 29792 | 75195  | 75666  | 2.65E-39  | 0.75 |
| 29792 | 81176  | 82094  | 7.66E-95  | 0.82 |
| 29792 | 94529  | 95128  | 1.45E-12  | 0.75 |
| 29792 | 104496 | 105305 | 1.49E-69  | 0.94 |
| 29792 | 105542 | 105933 | 5.50E-24  | 0.94 |
| 29792 | 106613 | 106882 | 1.67E-57  | 0.85 |
| 29792 | 142066 | 142630 | 1.14E-13  | 0.82 |
| 29792 | 154140 | 154555 | 2.04E-15  | 0.64 |
| 29792 | 157177 | 158563 | 5.32E-82  | 0.91 |
| 29792 | 171485 | 172808 | 5.83E-46  | 0.68 |
| 29792 | 181366 | 182555 | 4.07E-79  | 0.75 |
| 29793 | 4922   | 5154   | 7.82E-04  | 0.85 |
| 29793 | 16126  | 16546  | 3.16E-29  | 0.81 |
| 29793 | 82973  | 83513  | 9.96E-06  | 0.92 |
| 29793 | 103361 | 103776 | 7.02E-24  | 0.79 |
| 29793 | 141608 | 142202 | 6.36E-40  | 0.87 |
| 29793 | 185625 | 186126 | 4.49E-27  | 0.91 |
| 29793 | 213367 | 213671 | 4.33E-06  | 0.79 |
| 29793 | 223567 | 224011 | 5.34E-17  | 0.96 |
| 29793 | 243904 | 244210 | 9.91E-12  | 0.96 |
| 29793 | 252763 | 253299 | 9.90E-25  | 0.88 |
| 29793 | 273842 | 274072 | 1.03E-03  | 0    |
| 29793 | 332137 | 332953 | 1.27E-15  | 0.8  |
| 29793 | 358756 | 358980 | 2.99E-31  | 0.87 |
| 29793 | 376615 | 376977 | 4.05E-42  | 0.97 |
| 29793 | 405745 | 407231 | 1.51E-40  | 0.69 |
| 29793 | 411331 | 411681 | 1.43E-05  | 0.88 |
| 29793 | 479925 | 480199 | 6.84E-06  | 0.96 |
| 29793 | 565120 | 565836 | 5.94E-13  | 0.88 |
| 29793 | 565375 | 565977 | 3.96E-08  | 0.82 |
| 29793 | 582289 | 582569 | 2.06E-06  | 0.85 |
| 29793 | 622939 | 623499 | 1.22E-13  | 0.84 |
| 29793 | 626965 | 627188 | 1.11E-06  | 0.81 |
| 29793 | 639887 | 640278 | 1.44E-05  | 0.85 |
| 29793 | 688455 | 688893 | 9.46E-09  | 0.78 |
| 29794 | 8488   | 9164   | 1.67E-21  | 0.76 |

|       |        |        |           |      |
|-------|--------|--------|-----------|------|
| 29794 | 36239  | 36885  | 8.41E-33  | 0.84 |
| 29794 | 96021  | 97351  | 2.62E-17  | 0.76 |
| 29794 | 115754 | 116056 | 2.83E-52  | 0.9  |
| 29794 | 116514 | 117502 | 5.26E-25  | 0.8  |
| 29794 | 119930 | 120142 | 1.95E-13  | 0.77 |
| 29794 | 129973 | 130346 | 3.54E-34  | 0.93 |
| 29794 | 131473 | 132431 | 7.10E-45  | 0.79 |
| 29794 | 140931 | 141364 | 4.72E-29  | 0.64 |
| 29794 | 157537 | 157880 | 2.89E-13  | 0.79 |
| 29794 | 201213 | 201598 | 2.20E-10  | 0.81 |
| 29794 | 208248 | 209010 | 1.91E-33  | 0.83 |
| 29794 | 220708 | 221109 | 5.00E-15  | 0.8  |
| 29794 | 221559 | 222406 | 1.03E-52  | 0.9  |
| 29794 | 223583 | 223936 | 3.69E-16  | 0.83 |
| 29794 | 234834 | 235504 | 2.35E-18  | 0.76 |
| 29794 | 245181 | 246363 | 9.12E-52  | 0.76 |
| 29794 | 247019 | 247223 | 2.21E-09  | 0.73 |
| 29794 | 254878 | 256278 | 3.75E-82  | 0.7  |
| 29794 | 278904 | 281780 | 3.61E-93  | 0.65 |
| 29794 | 299693 | 300184 | 3.93E-36  | 0.95 |
| 29794 | 303609 | 304178 | 4.22E-35  | 0.74 |
| 29794 | 304627 | 305108 | 6.77E-11  | 0.66 |
| 29794 | 309067 | 310131 | 1.19E-72  | 0.8  |
| 29794 | 311506 | 312147 | 2.59E-18  | 0.88 |
| 29794 | 315767 | 316260 | 2.59E-25  | 0.9  |
| 29794 | 320326 | 320982 | 2.85E-58  | 0.94 |
| 29794 | 327294 | 328209 | 2.15E-50  | 0.86 |
| 29794 | 378202 | 378500 | 2.64E-21  | 0.61 |
| 29794 | 389385 | 390664 | 3.89E-60  | 0.88 |
| 29794 | 390932 | 391628 | 3.56E-97  | 0.94 |
| 29794 | 398859 | 400750 | 4.75E-91  | 0.84 |
| 29794 | 401714 | 402790 | 4.53E-51  | 0.87 |
| 29794 | 403298 | 403810 | 1.37E-30  | 0.88 |
| 29794 | 406733 | 407994 | 4.44E-39  | 0.79 |
| 29794 | 420344 | 421081 | 6.97E-63  | 0.92 |
| 29794 | 437675 | 437986 | 2.14E-15  | 0.77 |
| 29794 | 438336 | 438837 | 1.11E-23  | 0.84 |
| 29794 | 515061 | 516735 | 8.62E-53  | 0.72 |
| 29794 | 530461 | 533185 | 2.95E-139 | 0.81 |
| 29794 | 537894 | 538852 | 5.67E-37  | 0.86 |
| 29794 | 542100 | 543136 | 3.07E-19  | 0.7  |
| 29794 | 551838 | 552474 | 1.17E-22  | 0.8  |
| 29794 | 557975 | 558243 | 6.09E-16  | 0.82 |
| 29794 | 567133 | 567791 | 6.00E-13  | 0.72 |
| 29794 | 572784 | 573802 | 2.28E-36  | 0.81 |
| 29794 | 623401 | 623921 | 9.44E-22  | 0.84 |
| 29794 | 626032 | 626525 | 1.51E-40  | 0.94 |
| 29794 | 641606 | 642619 | 4.93E-43  | 0.6  |
| 29794 | 655196 | 655637 | 1.02E-09  | 0.63 |
| 29794 | 676102 | 676787 | 4.54E-34  | 0.84 |
| 29794 | 684455 | 685625 | 2.85E-44  | 0.79 |
| 29794 | 704527 | 705427 | 1.87E-27  | 0.78 |
| 29794 | 705642 | 706459 | 1.05E-74  | 0.85 |

|       |         |         |           |      |
|-------|---------|---------|-----------|------|
| 29794 | 714641  | 715208  | 4.55E-22  | 0.76 |
| 29794 | 759494  | 760414  | 6.99E-39  | 0.9  |
| 29794 | 760703  | 760966  | 1.64E-25  | 0.9  |
| 29794 | 795425  | 796180  | 3.39E-30  | 0.83 |
| 29794 | 806424  | 806705  | 7.25E-44  | 0.87 |
| 29794 | 808052  | 808546  | 8.64E-54  | 0.93 |
| 29794 | 808806  | 809790  | 4.00E-55  | 0.66 |
| 29794 | 831437  | 831712  | 1.04E-19  | 0.85 |
| 29794 | 831942  | 832334  | 3.20E-25  | 0.92 |
| 29794 | 832564  | 833200  | 9.59E-37  | 0.88 |
| 29794 | 875218  | 875791  | 4.44E-12  | 0.85 |
| 29794 | 897536  | 897774  | 2.92E-18  | 0.83 |
| 29794 | 902783  | 903597  | 1.99E-29  | 0.76 |
| 29794 | 920405  | 920766  | 1.39E-16  | 0.76 |
| 29794 | 943035  | 943528  | 2.41E-39  | 0.91 |
| 29794 | 944147  | 944903  | 3.61E-19  | 0.83 |
| 29794 | 948332  | 948836  | 2.18E-33  | 0.71 |
| 29794 | 949060  | 949846  | 5.79E-59  | 0.93 |
| 29794 | 953721  | 954133  | 1.88E-13  | 0.79 |
| 29794 | 987444  | 987913  | 2.35E-31  | 0.65 |
| 29794 | 988120  | 989261  | 3.34E-64  | 0.93 |
| 29794 | 1004318 | 1004764 | 4.46E-21  | 0.71 |
| 29794 | 1006391 | 1007568 | 2.28E-52  | 0.85 |
| 29794 | 1025586 | 1026043 | 8.58E-47  | 0.78 |
| 29794 | 1053187 | 1053854 | 1.84E-28  | 0.72 |
| 29794 | 1055463 | 1055837 | 1.88E-13  | 0.79 |
| 29794 | 1056394 | 1057884 | 4.82E-71  | 0.88 |
| 29794 | 1059711 | 1059961 | 3.66E-18  | 0.81 |
| 29794 | 1069499 | 1070085 | 4.86E-37  | 0.87 |
| 29794 | 1097056 | 1097530 | 3.40E-16  | 0.77 |
| 29794 | 1108317 | 1108819 | 9.92E-39  | 0.86 |
| 29794 | 1109101 | 1109440 | 1.82E-25  | 0.93 |
| 29794 | 1115956 | 1116857 | 5.94E-45  | 0.8  |
| 29794 | 1119415 | 1120281 | 5.96E-34  | 0.78 |
| 29794 | 1122686 | 1123620 | 4.13E-62  | 0.91 |
| 29794 | 1147150 | 1147380 | 8.41E-12  | 0.79 |
| 29794 | 1147426 | 1147940 | 4.77E-22  | 0.83 |
| 29794 | 1175952 | 1176535 | 1.09E-45  | 0.76 |
| 29794 | 1184187 | 1185173 | 1.92E-31  | 0.83 |
| 29794 | 1217090 | 1219373 | 6.89E-121 | 0.81 |
| 29794 | 1224829 | 1227467 | 9.24E-157 | 0.92 |
| 29794 | 1228699 | 1229453 | 7.45E-62  | 0.86 |
| 29794 | 1232936 | 1233213 | 1.34E-10  | 0.86 |
| 29794 | 1256338 | 1257238 | 5.94E-49  | 0.89 |
| 29794 | 1257718 | 1257987 | 8.21E-25  | 0.87 |
| 29794 | 1273895 | 1274326 | 1.41E-21  | 0.81 |
| 29794 | 1280628 | 1281351 | 1.24E-55  | 0.73 |
| 29794 | 1281554 | 1281986 | 8.06E-31  | 0.84 |
| 29794 | 1282943 | 1283460 | 3.01E-69  | 0.84 |
| 29794 | 1292076 | 1292459 | 1.93E-34  | 0.71 |
| 29794 | 1309724 | 1310187 | 7.52E-12  | 0.81 |
| 29796 | 80615   | 80891   | 5.56E-05  | 0.84 |
| 29797 | 10629   | 10839   | 1.40E-10  | 0.89 |

|       |        |        |           |      |
|-------|--------|--------|-----------|------|
| 29797 | 26715  | 27591  | 5.30E-69  | 0.91 |
| 29797 | 27842  | 28805  | 2.67E-50  | 0.97 |
| 29797 | 31801  | 33268  | 9.91E-128 | 0.93 |
| 29797 | 34159  | 34826  | 8.07E-36  | 0.92 |
| 29797 | 35116  | 35353  | 2.77E-33  | 0.94 |
| 29797 | 35707  | 36186  | 9.55E-67  | 0.91 |
| 29797 | 38462  | 39014  | 1.02E-55  | 0.96 |
| 29797 | 44360  | 44812  | 6.53E-16  | 0.91 |
| 29797 | 68670  | 69440  | 5.23E-10  | 0.81 |
| 29797 | 77787  | 78144  | 8.31E-16  | 0.88 |
| 29797 | 128888 | 129581 | 5.07E-42  | 0.93 |
| 29797 | 136375 | 136919 | 4.09E-14  | 0.69 |
| 29797 | 138581 | 139482 | 1.66E-32  | 0.89 |
| 29797 | 159021 | 159252 | 4.75E-47  | 0.87 |
| 29797 | 168706 | 169904 | 2.87E-37  | 0.62 |
| 29797 | 209916 | 210618 | 4.26E-68  | 0.92 |
| 29797 | 218317 | 218650 | 8.29E-05  | 0.94 |
| 29797 | 222199 | 222463 | 3.51E-37  | 0.97 |
| 29797 | 222824 | 224207 | 1.71E-66  | 0.8  |
| 29797 | 224221 | 224729 | 1.15E-13  | 0.86 |
| 29797 | 225905 | 226294 | 1.76E-29  | 0.97 |
| 29797 | 273662 | 275099 | 1.27E-40  | 0.82 |
| 29797 | 295688 | 296294 | 1.36E-60  | 0.95 |
| 29797 | 297895 | 298362 | 4.35E-39  | 0.92 |
| 29797 | 302255 | 302753 | 1.43E-58  | 0.87 |
| 29797 | 303164 | 304034 | 3.61E-58  | 0.91 |
| 29797 | 304246 | 304618 | 1.90E-20  | 0.92 |
| 29797 | 304944 | 305413 | 3.78E-45  | 0.91 |
| 29797 | 307063 | 308654 | 1.24E-80  | 0.76 |
| 29797 | 323897 | 324250 | 3.40E-25  | 0.86 |
| 29797 | 342059 | 343034 | 4.12E-10  | 0.69 |
| 29797 | 395095 | 396144 | 7.02E-91  | 0.89 |
| 29797 | 396498 | 398217 | 2.24E-186 | 0.87 |
| 29798 | 7844   | 8063   | 2.23E-11  | 0.91 |
| 29798 | 46967  | 47322  | 9.14E-20  | 0.9  |
| 29798 | 59417  | 60322  | 1.95E-76  | 0.9  |
| 29798 | 75856  | 77159  | 4.69E-96  | 0.92 |
| 29798 | 79177  | 79774  | 1.30E-94  | 0.8  |
| 29799 | 7836   | 8582   | 2.85E-24  | 0.79 |
| 29799 | 21911  | 22920  | 5.08E-57  | 0.83 |
| 29799 | 23276  | 23703  | 4.38E-39  | 0.95 |
| 29799 | 26358  | 27494  | 7.55E-125 | 0.95 |
| 29799 | 27817  | 28382  | 9.37E-43  | 0.89 |
| 29799 | 29010  | 30109  | 5.40E-69  | 0.92 |
| 29799 | 31382  | 31769  | 1.30E-26  | 0.88 |
| 29799 | 33268  | 33663  | 2.07E-17  | 0.68 |
| 29799 | 35685  | 36191  | 5.16E-31  | 0.91 |
| 29799 | 37121  | 37601  | 4.34E-26  | 0.9  |
| 29799 | 44325  | 44577  | 1.88E-30  | 0.89 |
| 29799 | 55483  | 55702  | 3.47E-20  | 0.95 |
| 29799 | 65348  | 65784  | 1.53E-46  | 0.94 |
| 29799 | 67731  | 68022  | 1.23E-33  | 0.94 |
| 29799 | 68686  | 68887  | 3.11E-31  | 0.96 |

|       |        |        |           |      |
|-------|--------|--------|-----------|------|
| 29799 | 70079  | 71093  | 7.54E-105 | 0.9  |
| 29799 | 71434  | 71994  | 2.36E-35  | 0.77 |
| 29799 | 72464  | 73088  | 4.45E-75  | 0.94 |
| 29799 | 163587 | 163942 | 7.43E-11  | 0.83 |
| 29799 | 168952 | 169264 | 4.48E-08  | 0.94 |
| 29799 | 189832 | 190101 | 8.48E-13  | 0.75 |
| 29799 | 190651 | 191228 | 8.27E-17  | 0.78 |
| 29799 | 191446 | 191685 | 6.55E-10  | 0.83 |
| 29799 | 222916 | 223177 | 2.60E-16  | 0.81 |
| 29799 | 242102 | 242312 | 3.68E-04  | 0.97 |
| 29799 | 258603 | 258941 | 4.58E-08  | 0.82 |
| 29799 | 282338 | 282643 | 7.63E-06  | 0.82 |
| 29799 | 290645 | 291065 | 2.51E-06  | 0.77 |
| 29799 | 290981 | 291734 | 1.47E-11  | 0.84 |
| 29799 | 300554 | 300908 | 6.17E-06  | 1    |
| 29799 | 302369 | 302702 | 2.32E-07  | 0.93 |
| 29799 | 318496 | 318770 | 6.31E-13  | 0.89 |
| 29799 | 454819 | 455629 | 1.27E-36  | 0.95 |
| 29799 | 455926 | 456501 | 1.45E-32  | 0.94 |
| 29799 | 457652 | 457858 | 3.37E-26  | 0.92 |
| 29799 | 470316 | 470698 | 2.26E-17  | 0.82 |
| 29799 | 475611 | 476848 | 2.51E-55  | 0.85 |
| 29799 | 485350 | 485764 | 1.56E-13  | 0.71 |
| 29799 | 495843 | 496169 | 5.16E-15  | 0.85 |
| 29799 | 503289 | 503659 | 3.87E-35  | 0.94 |
| 29799 | 542523 | 542738 | 1.83E-11  | 0.92 |
| 29799 | 558271 | 559155 | 2.17E-109 | 0.9  |
| 29799 | 559984 | 561472 | 1.56E-85  | 0.83 |
| 29799 | 590841 | 592194 | 3.12E-72  | 0.87 |
| 29799 | 600106 | 600520 | 2.90E-11  | 0.9  |
| 29799 | 612616 | 613077 | 3.27E-92  | 0.9  |
| 29799 | 642829 | 643054 | 4.08E-18  | 0.66 |
| 29799 | 704488 | 704919 | 7.10E-16  | 0.87 |
| 29799 | 713091 | 713726 | 2.85E-46  | 0.9  |
| 29799 | 720244 | 720767 | 3.65E-08  | 0.88 |
| 29800 | 4550   | 4853   | 9.74E-07  | 0.97 |
| 29800 | 10609  | 10879  | 2.13E-17  | 0.61 |
| 29800 | 17193  | 17424  | 6.66E-11  | 0.96 |
| 29800 | 30982  | 31186  | 6.54E-08  | 0.87 |
| 29800 | 36166  | 36472  | 7.87E-14  | 0.87 |
| 29801 | 2369   | 2844   | 3.15E-18  | 0.71 |
| 29801 | 4379   | 4865   | 7.19E-16  | 0.77 |
| 29801 | 7523   | 7903   | 8.58E-73  | 0.79 |
| 29801 | 24350  | 24945  | 8.06E-34  | 0.88 |
| 29801 | 25162  | 25795  | 1.21E-32  | 0.77 |
| 29801 | 26819  | 27258  | 1.26E-15  | 0.76 |
| 29801 | 29015  | 30422  | 3.84E-90  | 0.61 |
| 29801 | 47395  | 48935  | 5.08E-130 | 0.81 |
| 29801 | 50152  | 50729  | 2.52E-73  | 0.91 |
| 29801 | 52543  | 53171  | 2.67E-81  | 0.93 |
| 29801 | 85476  | 85849  | 2.67E-05  | 0.78 |
| 29801 | 87127  | 87765  | 1.81E-08  | 0.77 |
| 29801 | 107655 | 107856 | 3.63E-29  | 0.93 |

|       |        |        |           |      |
|-------|--------|--------|-----------|------|
| 29801 | 123966 | 124788 | 8.73E-27  | 0.75 |
| 29801 | 141442 | 141756 | 1.01E-08  | 0.82 |
| 29801 | 144545 | 145426 | 2.08E-47  | 0.8  |
| 29801 | 147278 | 148085 | 3.36E-37  | 0.8  |
| 29801 | 190845 | 191500 | 2.58E-21  | 0.77 |
| 29801 | 191712 | 192230 | 1.23E-21  | 0.83 |
| 29801 | 248067 | 248846 | 6.51E-48  | 0.9  |
| 29801 | 249155 | 250105 | 5.66E-68  | 0.92 |
| 29801 | 250307 | 251643 | 4.54E-88  | 0.68 |
| 29801 | 276385 | 276861 | 5.22E-23  | 0.76 |
| 29801 | 304554 | 305351 | 2.15E-43  | 0.84 |
| 29801 | 312767 | 313050 | 1.01E-12  | 0.79 |
| 29801 | 315164 | 315434 | 7.47E-30  | 0.89 |
| 29801 | 376995 | 377341 | 2.00E-14  | 0.81 |
| 29801 | 402501 | 402814 | 7.76E-20  | 0.78 |
| 29801 | 405107 | 406540 | 2.43E-42  | 0.7  |
| 29801 | 407913 | 408191 | 1.39E-11  | 0.74 |
| 29801 | 408747 | 409088 | 9.74E-12  | 0.89 |
| 29801 | 412920 | 414068 | 1.45E-52  | 0.83 |
| 29801 | 475844 | 476297 | 6.28E-19  | 0.78 |
| 29801 | 501797 | 502205 | 1.75E-22  | 0.68 |
| 29801 | 513331 | 513977 | 1.50E-56  | 0.91 |
| 29801 | 519020 | 519455 | 1.84E-06  | 0.67 |
| 29801 | 538667 | 539061 | 1.39E-34  | 0.86 |
| 29801 | 560199 | 561883 | 4.82E-56  | 0.71 |
| 29801 | 631207 | 631759 | 4.54E-32  | 0.79 |
| 29801 | 638269 | 640551 | 2.89E-80  | 0.7  |
| 29801 | 641302 | 641686 | 3.91E-43  | 0.84 |
| 29801 | 655136 | 655572 | 4.08E-38  | 0.93 |
| 29801 | 659980 | 660698 | 2.08E-40  | 0.75 |
| 29801 | 661190 | 662310 | 8.70E-60  | 0.89 |
| 29801 | 668207 | 669178 | 2.10E-32  | 0.79 |
| 29801 | 698780 | 699646 | 6.63E-25  | 0.82 |
| 29801 | 711385 | 711844 | 7.83E-47  | 0.72 |
| 29801 | 717443 | 717946 | 7.20E-29  | 0.63 |
| 29801 | 748476 | 748713 | 2.83E-15  | 0.8  |
| 29801 | 750210 | 750977 | 3.84E-36  | 0.77 |
| 29801 | 768669 | 768919 | 2.76E-28  | 0.85 |
| 29801 | 770329 | 770629 | 2.61E-16  | 0.8  |
| 29801 | 771663 | 773582 | 3.09E-128 | 0.89 |
| 29801 | 776641 | 777262 | 1.37E-34  | 0.82 |
| 29801 | 784739 | 785031 | 1.30E-22  | 0.87 |
| 29801 | 790534 | 791320 | 1.58E-22  | 0.67 |
| 29801 | 802696 | 803956 | 7.35E-73  | 0.87 |
| 29801 | 818296 | 818790 | 1.02E-22  | 0.8  |
| 29801 | 821257 | 822064 | 2.05E-25  | 0.81 |
| 29801 | 822350 | 822696 | 5.07E-20  | 0.76 |
| 29801 | 838309 | 839159 | 6.99E-34  | 0.78 |
| 29801 | 846531 | 846916 | 3.59E-47  | 0.9  |
| 29801 | 847767 | 848149 | 4.34E-34  | 0.84 |
| 29801 | 853267 | 853556 | 1.65E-29  | 0.93 |
| 29801 | 854217 | 854530 | 7.04E-45  | 0.89 |
| 29801 | 858161 | 859626 | 2.37E-86  | 0.91 |



|       |         |         |          |      |
|-------|---------|---------|----------|------|
| 29801 | 859870  | 860144  | 2.33E-27 | 0.91 |
| 29801 | 863652  | 864101  | 1.18E-22 | 0.75 |
| 29801 | 866951  | 867979  | 3.57E-31 | 0.81 |
| 29801 | 879246  | 880059  | 1.05E-60 | 0.91 |
| 29801 | 884059  | 884444  | 3.39E-43 | 0.88 |
| 29801 | 900166  | 900678  | 9.56E-19 | 0.82 |
| 29801 | 903581  | 904602  | 2.39E-25 | 0.62 |
| 29801 | 906916  | 907705  | 2.28E-19 | 0.88 |
| 29801 | 907907  | 908357  | 1.16E-20 | 0.92 |
| 29801 | 909856  | 910887  | 6.94E-42 | 0.64 |
| 29801 | 917124  | 917430  | 1.06E-11 | 0.7  |
| 29801 | 921647  | 921962  | 7.74E-45 | 0.96 |
| 29801 | 923317  | 923788  | 1.51E-09 | 0.76 |
| 29801 | 928597  | 929847  | 5.49E-89 | 0.8  |
| 29801 | 950363  | 950707  | 1.65E-32 | 0.7  |
| 29801 | 951040  | 951275  | 1.59E-47 | 0.91 |
| 29801 | 951994  | 952446  | 8.40E-21 | 0.79 |
| 29801 | 955595  | 955974  | 6.56E-34 | 0.9  |
| 29801 | 956195  | 957231  | 1.65E-44 | 0.81 |
| 29801 | 982981  | 984105  | 4.75E-32 | 0.82 |
| 29801 | 990166  | 990837  | 6.54E-29 | 0.86 |
| 29801 | 993499  | 994027  | 3.42E-13 | 0.84 |
| 29801 | 999467  | 999845  | 2.49E-18 | 0.73 |
| 29801 | 1012754 | 1013175 | 1.03E-10 | 0.89 |
| 29802 | 41178   | 41450   | 8.54E-06 | 0.97 |
| 29802 | 57264   | 57505   | 8.21E-07 | 0.89 |
| 29802 | 152236  | 152870  | 8.05E-07 | 1    |
| 29802 | 208342  | 208608  | 1.03E-09 | 0.86 |
| 29802 | 276901  | 277625  | 3.63E-38 | 0.93 |
| 29802 | 303131  | 303460  | 3.99E-10 | 1    |
| 29802 | 341103  | 341376  | 1.28E-09 | 0.93 |
| 29803 | 26508   | 26893   | 1.08E-04 | 0.79 |
| 29803 | 28707   | 29244   | 2.43E-06 | 0.88 |
| 29803 | 32780   | 33372   | 3.73E-04 | 0.92 |
| 29803 | 44343   | 44739   | 2.31E-18 | 0.87 |
| 29803 | 90552   | 90907   | 1.01E-07 | 0.95 |
| 29803 | 115230  | 115533  | 1.38E-11 | 0.92 |
| 29803 | 118679  | 118883  | 1.43E-05 | 0.81 |
| 29803 | 118812  | 119064  | 2.79E-06 | 0.84 |
| 29803 | 187278  | 187819  | 6.47E-06 | 0.88 |
| 29803 | 229122  | 229502  | 3.20E-08 | 0.78 |
| 29803 | 229220  | 229709  | 1.66E-08 | 0.79 |
| 29803 | 262171  | 262606  | 4.14E-08 | 0.82 |
| 29803 | 278988  | 279202  | 2.20E-45 | 0.87 |
| 29803 | 281320  | 281620  | 9.71E-06 | 0.83 |
| 29803 | 282646  | 282910  | 9.93E-12 | 0.9  |
| 29803 | 282938  | 283439  | 1.17E-15 | 0.86 |
| 29803 | 308872  | 309437  | 7.35E-09 | 0.84 |
| 29804 | 131633  | 132234  | 6.58E-34 | 0.82 |
| 29804 | 160336  | 160577  | 3.36E-15 | 0.94 |
| 29804 | 166479  | 166859  | 1.13E-06 | 0.8  |
| 29804 | 170541  | 170794  | 3.94E-11 | 0.81 |
| 29804 | 175559  | 177593  | 5.78E-67 | 0.78 |

|       |        |        |          |      |
|-------|--------|--------|----------|------|
| 29804 | 178151 | 178380 | 1.24E-06 | 0.86 |
| 29804 | 196727 | 197440 | 4.48E-07 | 1    |
| 29804 | 214414 | 214923 | 9.18E-44 | 0.88 |
| 29804 | 226308 | 226658 | 3.55E-22 | 0.92 |
| 29804 | 227072 | 227811 | 7.37E-49 | 0.97 |
| 29804 | 228044 | 228436 | 1.16E-45 | 0.94 |
| 29804 | 228739 | 228989 | 9.70E-27 | 0.92 |
| 29804 | 231401 | 231602 | 8.25E-11 | 0.85 |
| 29804 | 266259 | 266944 | 1.03E-44 | 0.87 |
| 29804 | 269214 | 270435 | 2.95E-58 | 0.81 |
| 29804 | 271297 | 272295 | 6.33E-54 | 0.83 |
| 29804 | 272557 | 272799 | 5.18E-19 | 0.82 |
| 29804 | 273248 | 273482 | 2.43E-41 | 0.84 |
| 29804 | 292569 | 293079 | 4.71E-19 | 0.87 |
| 29804 | 358527 | 358920 | 1.03E-26 | 0.96 |
| 29804 | 379487 | 379856 | 1.18E-26 | 0.96 |
| 29804 | 390385 | 390782 | 3.64E-21 | 0.88 |
| 29804 | 414776 | 415138 | 1.87E-07 | 0.8  |
| 29804 | 414856 | 415235 | 8.03E-08 | 0.78 |
| 29804 | 415209 | 415574 | 1.17E-08 | 0.75 |
| 29804 | 427203 | 428089 | 2.34E-70 | 0.96 |
| 29804 | 451714 | 452779 | 3.01E-81 | 0.92 |
| 29804 | 467561 | 468080 | 4.58E-36 | 0.86 |
| 29804 | 472280 | 473017 | 7.75E-37 | 0.94 |
| 29804 | 566372 | 566586 | 9.44E-12 | 0.83 |
| 29804 | 579054 | 579355 | 1.97E-19 | 0.91 |
| 29804 | 680539 | 681195 | 1.15E-28 | 0.93 |
| 29804 | 685477 | 685798 | 2.29E-08 | 0.76 |
| 29804 | 719798 | 720813 | 1.63E-48 | 0.88 |
| 29804 | 721019 | 721880 | 1.63E-44 | 0.9  |
| 29804 | 725197 | 725444 | 2.24E-21 | 0.89 |
| 29804 | 730201 | 730698 | 6.37E-21 | 0.81 |
| 29804 | 735431 | 736206 | 4.15E-27 | 0.81 |
| 29804 | 736229 | 736453 | 1.59E-21 | 0.9  |
| 29804 | 747762 | 748834 | 9.81E-46 | 0.87 |
| 29804 | 754438 | 754939 | 1.27E-44 | 0.95 |
| 29804 | 755502 | 756131 | 3.90E-29 | 0.8  |
| 29804 | 757427 | 757710 | 4.09E-21 | 0.95 |
| 29804 | 760431 | 760975 | 1.79E-37 | 0.66 |
| 29804 | 762285 | 762934 | 2.88E-31 | 0.71 |
| 29804 | 763142 | 763577 | 3.30E-24 | 0.8  |
| 29804 | 765500 | 765971 | 1.94E-11 | 0.63 |
| 29804 | 774179 | 774537 | 2.88E-21 | 0.82 |
| 29804 | 775439 | 775995 | 2.22E-31 | 0.77 |
| 29804 | 805669 | 805918 | 2.83E-15 | 0.82 |
| 29804 | 808281 | 809287 | 1.29E-68 | 0.71 |
| 29804 | 813188 | 813626 | 3.49E-74 | 0.93 |
| 29804 | 813892 | 814600 | 6.23E-60 | 0.91 |
| 29804 | 814801 | 815025 | 3.99E-36 | 0.94 |
| 29804 | 850845 | 851150 | 2.01E-28 | 0.84 |
| 29804 | 852050 | 852592 | 1.49E-19 | 0.88 |
| 29804 | 857935 | 858546 | 9.90E-37 | 0.88 |
| 29804 | 863874 | 864658 | 1.68E-70 | 0.65 |

|       |         |         |           |      |
|-------|---------|---------|-----------|------|
| 29804 | 891736  | 893286  | 2.71E-89  | 0.83 |
| 29804 | 893513  | 893992  | 3.62E-29  | 0.9  |
| 29804 | 895326  | 895716  | 4.83E-18  | 0.75 |
| 29804 | 896600  | 897052  | 6.96E-24  | 0.79 |
| 29804 | 897348  | 897780  | 5.67E-15  | 0.85 |
| 29804 | 910712  | 912162  | 4.33E-50  | 0.82 |
| 29804 | 920244  | 920472  | 2.13E-11  | 0.87 |
| 29804 | 928501  | 929376  | 5.09E-65  | 0.86 |
| 29804 | 929708  | 931612  | 6.87E-99  | 0.85 |
| 29804 | 932006  | 932573  | 2.49E-14  | 0.76 |
| 29804 | 946881  | 947810  | 3.09E-56  | 0.89 |
| 29804 | 953742  | 954349  | 1.42E-10  | 0.71 |
| 29804 | 955658  | 956062  | 8.65E-12  | 0.6  |
| 29804 | 978164  | 978491  | 2.22E-19  | 0.8  |
| 29804 | 1017226 | 1017693 | 5.58E-45  | 0.78 |
| 29804 | 1018459 | 1019057 | 1.84E-52  | 0.9  |
| 29804 | 1071772 | 1072320 | 9.26E-12  | 0.82 |
| 29804 | 1105304 | 1105646 | 7.15E-16  | 0.64 |
| 29805 | 28775   | 29278   | 3.42E-29  | 0.66 |
| 29805 | 48344   | 48675   | 8.46E-58  | 0.9  |
| 29805 | 49067   | 50330   | 1.21E-71  | 0.75 |
| 29805 | 52255   | 53280   | 2.86E-60  | 0.8  |
| 29805 | 58753   | 59523   | 1.55E-23  | 0.74 |
| 29805 | 68523   | 68912   | 1.68E-35  | 0.88 |
| 29805 | 76246   | 76679   | 4.25E-15  | 0.79 |
| 29805 | 77905   | 78151   | 7.62E-25  | 0.9  |
| 29805 | 91192   | 91891   | 1.23E-16  | 0.86 |
| 29805 | 92623   | 93582   | 5.24E-68  | 0.87 |
| 29805 | 94060   | 94704   | 5.73E-36  | 0.84 |
| 29805 | 94934   | 95193   | 5.01E-36  | 0.95 |
| 29805 | 97243   | 98060   | 1.30E-50  | 0.77 |
| 29805 | 109986  | 110449  | 8.16E-44  | 0.81 |
| 29805 | 119648  | 120338  | 1.77E-25  | 0.82 |
| 29805 | 143537  | 144076  | 1.54E-18  | 0.87 |
| 29805 | 148935  | 150027  | 1.36E-46  | 0.67 |
| 29805 | 152173  | 152580  | 1.05E-11  | 0.77 |
| 29805 | 153880  | 154365  | 5.45E-21  | 0.62 |
| 29805 | 182467  | 183192  | 1.92E-55  | 0.88 |
| 29805 | 189188  | 189568  | 1.25E-12  | 0.8  |
| 29805 | 198556  | 198893  | 2.95E-13  | 0.79 |
| 29805 | 199428  | 199832  | 1.50E-13  | 0.81 |
| 29805 | 203838  | 204453  | 2.27E-27  | 0.82 |
| 29805 | 223357  | 224857  | 6.69E-84  | 0.79 |
| 29805 | 225090  | 225834  | 1.62E-55  | 0.81 |
| 29805 | 226198  | 227101  | 2.08E-44  | 0.77 |
| 29805 | 231714  | 233158  | 2.22E-32  | 0.67 |
| 29805 | 236828  | 237085  | 1.67E-10  | 0.79 |
| 29805 | 268221  | 270491  | 3.06E-142 | 0.83 |
| 29805 | 291410  | 292834  | 8.93E-63  | 0.88 |
| 29805 | 293832  | 294191  | 1.67E-28  | 0.85 |
| 29805 | 296956  | 297340  | 4.56E-25  | 0.86 |
| 29805 | 298493  | 299348  | 5.49E-55  | 0.81 |
| 29805 | 319303  | 320960  | 7.00E-95  | 0.89 |

|       |        |        |           |      |
|-------|--------|--------|-----------|------|
| 29805 | 350399 | 351879 | 1.24E-57  | 0.68 |
| 29805 | 357391 | 358085 | 1.79E-22  | 0.84 |
| 29805 | 362094 | 362632 | 3.32E-19  | 0.84 |
| 29805 | 367336 | 368079 | 4.14E-55  | 0.89 |
| 29805 | 368287 | 369174 | 2.67E-37  | 0.82 |
| 29805 | 379005 | 379556 | 2.14E-25  | 0.88 |
| 29805 | 384395 | 384780 | 2.76E-20  | 0.89 |
| 29805 | 403870 | 404116 | 2.97E-10  | 0.96 |
| 29805 | 415007 | 415406 | 4.91E-24  | 0.83 |
| 29805 | 425451 | 425768 | 1.87E-18  | 0.89 |
| 29805 | 426094 | 426653 | 4.51E-24  | 0.85 |
| 29805 | 427616 | 428097 | 5.18E-31  | 0.91 |
| 29805 | 428386 | 428694 | 5.87E-15  | 0.9  |
| 29805 | 430483 | 430984 | 7.97E-29  | 0.82 |
| 29806 | 5795   | 6607   | 6.28E-71  | 0.81 |
| 29806 | 7862   | 8141   | 3.00E-23  | 0.9  |
| 29806 | 25849  | 26382  | 2.16E-17  | 0.79 |
| 29806 | 48152  | 48967  | 6.03E-32  | 0.76 |
| 29806 | 58012  | 60824  | 7.63E-118 | 0.73 |
| 29806 | 62884  | 63542  | 1.97E-34  | 0.85 |
| 29806 | 89973  | 90376  | 9.02E-24  | 0.83 |
| 29806 | 91110  | 91517  | 7.19E-20  | 0.89 |
| 29806 | 105472 | 105860 | 4.98E-15  | 0.74 |
| 29806 | 107582 | 107862 | 4.18E-29  | 0.97 |
| 29806 | 146243 | 146482 | 1.22E-05  | 0.89 |
| 29806 | 209775 | 209998 | 2.25E-34  | 0.93 |
| 29806 | 249188 | 249550 | 3.94E-28  | 0.79 |
| 29806 | 273162 | 273887 | 9.15E-17  | 0.83 |
| 29806 | 326866 | 327231 | 7.94E-19  | 0.88 |
| 29806 | 331259 | 332250 | 1.62E-33  | 0.8  |
| 29806 | 332609 | 332982 | 4.10E-17  | 0.66 |
| 29806 | 334290 | 334893 | 2.12E-27  | 0.63 |
| 29806 | 345067 | 345979 | 3.06E-45  | 0.76 |
| 29806 | 346900 | 347806 | 5.09E-19  | 0.73 |
| 29806 | 360518 | 361169 | 1.43E-52  | 0.91 |
| 29806 | 385823 | 387574 | 2.31E-85  | 0.87 |
| 29807 | 42416  | 43096  | 9.26E-59  | 0.92 |
| 29807 | 45761  | 46088  | 2.34E-32  | 0.9  |
| 29807 | 52294  | 52721  | 1.15E-05  | 0.79 |
| 29807 | 92182  | 92413  | 1.70E-08  | 1    |
| 29807 | 181697 | 183246 | 4.48E-81  | 0.76 |
| 29807 | 188106 | 188444 | 5.60E-49  | 0.84 |
| 29807 | 189066 | 189443 | 1.20E-70  | 0.89 |
| 29807 | 190206 | 190528 | 1.28E-26  | 0.85 |
| 29807 | 194860 | 195240 | 8.92E-19  | 0.85 |
| 29807 | 213111 | 214638 | 1.74E-45  | 0.7  |
| 29808 | 1158   | 1388   | 1.26E-03  | 0.81 |
| 29808 | 4331   | 4551   | 6.97E-13  | 0.94 |
| 29808 | 59831  | 60385  | 2.71E-20  | 0.81 |
| 29808 | 60719  | 60921  | 2.24E-07  | 0.97 |
| 29808 | 61206  | 61707  | 4.00E-22  | 0.77 |
| 29808 | 83764  | 84013  | 6.28E-07  | 1    |
| 29808 | 119552 | 120123 | 2.74E-32  | 0.62 |

|       |        |        |           |      |
|-------|--------|--------|-----------|------|
| 29808 | 145655 | 145872 | 4.11E-09  | 0.92 |
| 29808 | 176085 | 177014 | 1.06E-43  | 0.87 |
| 29808 | 191440 | 191711 | 3.54E-13  | 0.85 |
| 29808 | 197829 | 199224 | 3.05E-43  | 0.81 |
| 29808 | 230235 | 230465 | 2.25E-39  | 0.94 |
| 29808 | 230686 | 231015 | 4.06E-26  | 0.92 |
| 29808 | 245719 | 246376 | 1.03E-57  | 0.92 |
| 29808 | 249563 | 251180 | 2.38E-110 | 0.93 |
| 29808 | 251630 | 252330 | 5.01E-46  | 0.79 |
| 29808 | 294424 | 294768 | 1.15E-131 | 0.89 |
| 29808 | 326461 | 327418 | 1.75E-70  | 0.97 |
| 29808 | 333430 | 334164 | 6.63E-39  | 0.92 |
| 29808 | 334473 | 334946 | 5.70E-62  | 0.92 |
| 29808 | 335410 | 335901 | 1.73E-24  | 0.9  |
| 29808 | 336216 | 336499 | 2.86E-29  | 0.92 |
| 29808 | 338615 | 339021 | 1.31E-42  | 0.94 |
| 29808 | 345589 | 345821 | 1.72E-34  | 0.95 |
| 29808 | 410532 | 410833 | 3.81E-07  | 0.87 |
| 29808 | 424472 | 424675 | 3.78E-13  | 0.9  |
| 29808 | 449529 | 449911 | 5.80E-05  | 0.92 |
| 29808 | 587767 | 588318 | 1.13E-04  | 0.9  |
| 29808 | 741572 | 743257 | 2.02E-53  | 0.89 |
| 29810 | 29514  | 30090  | 6.09E-25  | 0.72 |
| 29810 | 47387  | 47858  | 2.31E-24  | 0.82 |
| 29810 | 58104  | 58494  | 1.25E-28  | 0.94 |
| 29811 | 14729  | 14935  | 3.20E-41  | 0.9  |
| 29811 | 15345  | 15950  | 2.80E-28  | 0.88 |
| 29811 | 16204  | 16405  | 2.66E-08  | 0.74 |
| 29811 | 16634  | 17316  | 3.24E-68  | 0.97 |
| 29811 | 25322  | 25770  | 1.82E-22  | 0.8  |
| 29811 | 40905  | 41359  | 9.51E-83  | 0.92 |
| 29811 | 41706  | 42584  | 1.16E-67  | 0.96 |
| 29811 | 47901  | 48249  | 7.90E-29  | 0.91 |
| 29811 | 83638  | 83967  | 1.55E-34  | 0.72 |
| 29811 | 103614 | 104203 | 2.18E-36  | 0.87 |
| 29811 | 161875 | 162165 | 8.19E-17  | 0.72 |
| 29811 | 182697 | 182995 | 3.69E-17  | 0.76 |
| 29811 | 202205 | 202424 | 1.17E-20  | 0.92 |
| 29811 | 203842 | 204296 | 7.47E-29  | 0.95 |
| 29811 | 209430 | 210185 | 3.44E-47  | 0.94 |
| 29811 | 210390 | 210812 | 8.56E-25  | 0.83 |
| 29811 | 220928 | 221154 | 2.16E-11  | 0.8  |
| 29811 | 222619 | 223090 | 5.78E-20  | 0.82 |
| 29811 | 222837 | 223235 | 1.66E-15  | 0.81 |
| 29811 | 223968 | 224247 | 1.26E-07  | 0.82 |
| 29811 | 240680 | 241389 | 1.20E-55  | 0.85 |
| 29811 | 248822 | 249365 | 1.35E-25  | 0.8  |
| 29811 | 264340 | 264582 | 3.52E-09  | 0.87 |
| 29811 | 275744 | 275954 | 3.62E-29  | 0.95 |
| 29811 | 288457 | 288713 | 1.44E-19  | 0.92 |
| 29811 | 296635 | 297347 | 6.77E-32  | 0.8  |
| 29811 | 301660 | 302127 | 9.36E-23  | 0.61 |
| 29811 | 302491 | 303077 | 2.50E-11  | 0.61 |

|       |        |        |           |      |
|-------|--------|--------|-----------|------|
| 29811 | 323578 | 323949 | 3.43E-33  | 0.88 |
| 29811 | 325236 | 326980 | 2.14E-82  | 0.64 |
| 29811 | 327226 | 327548 | 1.73E-40  | 0.86 |
| 29812 | 56704  | 57232  | 1.26E-28  | 0.78 |
| 29812 | 66754  | 67174  | 5.88E-32  | 0.88 |
| 29812 | 68710  | 68974  | 2.07E-15  | 0.82 |
| 29812 | 71290  | 72627  | 1.43E-61  | 0.89 |
| 29812 | 77448  | 77735  | 3.67E-09  | 0.91 |
| 29812 | 78040  | 78275  | 4.69E-11  | 0.8  |
| 29812 | 80423  | 80978  | 2.85E-26  | 0.86 |
| 29812 | 82022  | 82460  | 2.50E-26  | 0.85 |
| 29812 | 96288  | 96771  | 7.38E-13  | 0.75 |
| 29812 | 103676 | 104327 | 5.03E-43  | 0.86 |
| 29812 | 104703 | 105017 | 1.39E-21  | 0.92 |
| 29813 | 16852  | 17131  | 1.69E-28  | 0.95 |
| 29813 | 17396  | 18061  | 1.52E-38  | 0.68 |
| 29813 | 28902  | 29167  | 5.90E-17  | 0.88 |
| 29813 | 29904  | 32259  | 1.82E-143 | 0.89 |
| 29813 | 34889  | 35153  | 1.78E-07  | 0.78 |
| 29813 | 37449  | 37687  | 2.46E-04  | 0.72 |
| 29813 | 61685  | 62177  | 2.97E-09  | 0.67 |
| 29813 | 81611  | 81907  | 2.39E-09  | 0.89 |
| 29813 | 97932  | 98418  | 2.35E-21  | 0.88 |
| 29813 | 128154 | 129277 | 4.47E-157 | 0.9  |
| 29813 | 129519 | 130015 | 1.28E-24  | 0.81 |
| 29813 | 142913 | 143461 | 3.45E-62  | 0.83 |
| 29813 | 170301 | 170607 | 2.28E-27  | 0.9  |
| 29813 | 170946 | 171445 | 1.17E-27  | 0.92 |
| 29813 | 180949 | 181195 | 3.98E-11  | 0.79 |
| 29813 | 217784 | 218584 | 8.31E-64  | 0.81 |
| 29813 | 239262 | 239920 | 4.86E-43  | 0.86 |
| 29813 | 253066 | 253574 | 3.83E-17  | 0.87 |
| 29813 | 262106 | 262341 | 3.66E-13  | 0.67 |
| 29813 | 270876 | 271265 | 4.11E-25  | 0.86 |
| 29813 | 272111 | 272650 | 4.42E-59  | 0.88 |
| 29813 | 298496 | 299190 | 4.61E-28  | 0.82 |
| 29813 | 347469 | 347868 | 5.40E-09  | 0.61 |
| 29813 | 415569 | 415932 | 1.98E-37  | 0.86 |
| 29813 | 426650 | 428737 | 4.97E-96  | 0.7  |
| 29813 | 482588 | 483154 | 3.61E-30  | 0.84 |
| 29813 | 532308 | 533139 | 4.35E-37  | 0.77 |
| 29813 | 533789 | 534250 | 1.33E-26  | 0.94 |
| 29813 | 534621 | 535010 | 2.72E-57  | 0.89 |
| 29813 | 542145 | 542393 | 2.72E-23  | 0.61 |
| 29813 | 546187 | 547186 | 6.80E-52  | 0.87 |
| 29813 | 547797 | 548128 | 2.21E-33  | 0.83 |
| 29813 | 557283 | 561028 | 2.35E-202 | 0.83 |
| 29813 | 563755 | 565539 | 4.00E-88  | 0.78 |
| 29813 | 565837 | 566303 | 3.66E-46  | 0.94 |
| 29813 | 574772 | 575113 | 2.60E-23  | 0.85 |
| 29814 | 26891  | 28061  | 7.91E-36  | 0.78 |
| 29814 | 30613  | 31017  | 2.66E-19  | 0.81 |
| 29814 | 32502  | 34161  | 2.88E-82  | 0.87 |

|       |        |        |          |      |
|-------|--------|--------|----------|------|
| 29814 | 50833  | 51249  | 3.39E-12 | 0.62 |
| 29814 | 75701  | 76764  | 3.38E-66 | 0.83 |
| 29814 | 77102  | 77835  | 1.17E-56 | 0.84 |
| 29814 | 79719  | 79998  | 1.66E-25 | 0.91 |
| 29814 | 91336  | 92130  | 1.34E-38 | 0.88 |
| 29814 | 119209 | 119518 | 1.78E-16 | 0.88 |
| 29814 | 133833 | 134269 | 4.55E-14 | 0.8  |
| 29814 | 139236 | 139581 | 1.03E-13 | 0.94 |
| 29814 | 147063 | 147434 | 3.54E-07 | 0.79 |
| 29814 | 178312 | 178529 | 8.86E-05 | 0.65 |
| 29814 | 180350 | 180597 | 8.86E-05 | 0.77 |
| 29814 | 211468 | 211699 | 1.35E-10 | 0.69 |
| 29814 | 212651 | 214184 | 5.07E-60 | 0.88 |
| 29814 | 249725 | 250515 | 5.52E-32 | 0.87 |
| 29814 | 259489 | 260273 | 6.53E-28 | 0.75 |
| 29814 | 260805 | 261845 | 6.45E-92 | 0.93 |
| 29814 | 262145 | 262669 | 2.28E-56 | 0.83 |
| 29815 | 54091  | 54828  | 4.14E-23 | 0.6  |
| 29815 | 72023  | 73236  | 6.01E-65 | 0.7  |
| 29815 | 74946  | 75724  | 1.86E-42 | 0.88 |
| 29815 | 79827  | 80099  | 2.50E-17 | 0.73 |
| 29815 | 96546  | 97171  | 2.58E-24 | 0.73 |
| 29815 | 110849 | 111623 | 5.11E-36 | 0.77 |
| 29815 | 124083 | 124956 | 3.52E-42 | 0.82 |
| 29815 | 149478 | 150170 | 1.35E-13 | 0.62 |
| 29815 | 211080 | 211529 | 9.06E-20 | 0.87 |
| 29815 | 249373 | 249673 | 2.09E-18 | 0.8  |
| 29816 | 314    | 1300   | 2.47E-12 | 0.75 |
| 29816 | 21996  | 22930  | 1.24E-97 | 0.84 |
| 29816 | 42827  | 43302  | 2.69E-50 | 0.87 |
| 29816 | 45090  | 46777  | 7.00E-74 | 0.85 |
| 29816 | 60517  | 61608  | 8.61E-29 | 0.76 |
| 29816 | 68998  | 69851  | 5.72E-26 | 0.77 |
| 29816 | 123656 | 124283 | 1.71E-29 | 0.85 |
| 29816 | 171177 | 172020 | 9.00E-35 | 0.76 |
| 29816 | 173814 | 174057 | 1.01E-16 | 0.83 |
| 29816 | 174742 | 175550 | 2.84E-61 | 0.94 |
| 29816 | 176778 | 177104 | 6.12E-15 | 0.88 |
| 29816 | 186011 | 187735 | 1.29E-66 | 0.92 |
| 29816 | 189495 | 191060 | 3.72E-72 | 0.93 |
| 29816 | 207154 | 207396 | 4.37E-37 | 0.9  |
| 29816 | 207619 | 208149 | 1.91E-21 | 0.82 |
| 29816 | 247787 | 248768 | 6.55E-40 | 0.84 |
| 29816 | 249101 | 249449 | 1.49E-07 | 0.89 |
| 29816 | 252757 | 253140 | 1.87E-15 | 0.74 |
| 29816 | 255082 | 255625 | 6.57E-24 | 0.89 |
| 29816 | 261245 | 261602 | 1.04E-19 | 0.89 |
| 29816 | 284413 | 284968 | 4.25E-06 | 0.86 |
| 29816 | 314125 | 315838 | 1.26E-55 | 0.79 |
| 29816 | 323188 | 323714 | 7.62E-12 | 0.79 |
| 29816 | 339464 | 340592 | 5.76E-95 | 0.92 |
| 29816 | 383675 | 384413 | 8.31E-12 | 0.8  |
| 29817 | 10306  | 11214  | 1.62E-25 | 0.69 |

|       |        |        |          |      |
|-------|--------|--------|----------|------|
| 29817 | 36937  | 37475  | 2.32E-09 | 0.93 |
| 29817 | 95610  | 95884  | 9.88E-20 | 0.89 |
| 29817 | 108584 | 109238 | 5.49E-34 | 0.8  |
| 29817 | 108694 | 109280 | 1.11E-33 | 0.79 |
| 29817 | 110831 | 111154 | 1.21E-07 | 0.8  |
| 29817 | 114862 | 115323 | 1.32E-27 | 0.83 |
| 29817 | 194692 | 195071 | 1.00E-13 | 0.81 |
| 29818 | 206    | 473    | 4.77E-16 | 0.95 |
| 29818 | 6594   | 6932   | 4.16E-15 | 0.8  |
| 29818 | 14981  | 16313  | 4.39E-80 | 0.8  |
| 29818 | 16525  | 17518  | 1.18E-27 | 0.79 |
| 29818 | 50294  | 50848  | 5.98E-25 | 0.81 |
| 29818 | 53039  | 53306  | 1.10E-26 | 0.88 |
| 29818 | 60214  | 62051  | 4.89E-93 | 0.83 |
| 29818 | 101994 | 102417 | 1.87E-21 | 0.87 |
| 29818 | 102672 | 103478 | 9.15E-47 | 0.73 |
| 29818 | 108588 | 108992 | 3.19E-12 | 0.74 |
| 29818 | 112928 | 113335 | 2.84E-37 | 0.96 |
| 29818 | 145928 | 147046 | 1.20E-43 | 0.84 |
| 29818 | 152064 | 152661 | 6.87E-26 | 0.83 |
| 29818 | 155398 | 155912 | 3.32E-76 | 0.91 |
| 29818 | 156164 | 156974 | 2.83E-66 | 0.91 |
| 29819 | 17859  | 18415  | 1.66E-25 | 0.82 |
| 29819 | 18671  | 19411  | 5.26E-45 | 0.79 |
| 29819 | 29577  | 29837  | 3.54E-49 | 0.89 |
| 29819 | 51279  | 51564  | 1.02E-11 | 0.81 |
| 29819 | 78842  | 79251  | 2.99E-42 | 0.95 |
| 29819 | 79567  | 79781  | 1.87E-20 | 0.84 |
| 29819 | 80004  | 80427  | 3.54E-31 | 0.83 |
| 29819 | 84475  | 85140  | 8.35E-29 | 1    |
| 29820 | 22571  | 23167  | 1.75E-21 | 0.79 |
| 29820 | 23207  | 23790  | 1.06E-32 | 0.81 |
| 29820 | 49348  | 49551  | 1.09E-13 | 0.81 |
| 29820 | 55885  | 56480  | 2.89E-25 | 0.74 |
| 29820 | 67794  | 68748  | 9.77E-88 | 0.87 |
| 29820 | 75321  | 75605  | 6.56E-44 | 0.83 |
| 29820 | 90440  | 91434  | 1.61E-89 | 0.92 |
| 29820 | 134923 | 137030 | 1.53E-90 | 0.82 |
| 29820 | 216007 | 217027 | 7.44E-49 | 0.93 |
| 29820 | 217636 | 218827 | 6.38E-61 | 0.88 |
| 29820 | 272118 | 273068 | 4.44E-34 | 0.69 |
| 29820 | 284105 | 284751 | 2.00E-44 | 0.97 |
| 29820 | 296357 | 298892 | 5.70E-96 | 0.76 |
| 29820 | 339613 | 339994 | 1.29E-31 | 0.8  |
| 29820 | 341334 | 342240 | 9.98E-65 | 0.86 |
| 29820 | 342491 | 342718 | 5.04E-27 | 0.89 |
| 29820 | 343537 | 344150 | 1.06E-26 | 0.89 |
| 29820 | 353668 | 353871 | 8.64E-12 | 0.76 |
| 29822 | 8966   | 9486   | 7.46E-30 | 0.87 |
| 29822 | 67385  | 68220  | 9.96E-40 | 0.8  |
| 29822 | 68451  | 68876  | 8.07E-34 | 0.89 |
| 29822 | 74750  | 75032  | 9.28E-06 | 0.82 |
| 29822 | 88012  | 88466  | 1.18E-15 | 0.8  |



|       |        |        |           |      |
|-------|--------|--------|-----------|------|
| 29822 | 94112  | 94655  | 1.10E-19  | 0.68 |
| 29822 | 96184  | 96695  | 1.44E-29  | 0.79 |
| 29822 | 114400 | 115400 | 4.24E-64  | 0.64 |
| 29822 | 139895 | 140711 | 1.66E-23  | 0.74 |
| 29822 | 140914 | 141827 | 4.97E-37  | 0.84 |
| 29822 | 142365 | 144633 | 7.05E-174 | 0.91 |
| 29822 | 145840 | 147743 | 4.18E-83  | 0.85 |
| 29822 | 148550 | 148907 | 4.73E-19  | 0.86 |
| 29822 | 150781 | 151080 | 2.03E-14  | 0.86 |
| 29822 | 153198 | 153975 | 4.11E-61  | 0.74 |
| 29822 | 154220 | 154659 | 8.83E-23  | 0.75 |
| 29822 | 154878 | 155584 | 2.51E-38  | 0.82 |
| 29822 | 165362 | 165979 | 1.01E-25  | 0.66 |
| 29822 | 166236 | 166657 | 2.97E-20  | 0.91 |
| 29822 | 166386 | 166978 | 3.19E-21  | 0.83 |
| 29822 | 172961 | 173178 | 3.47E-20  | 0.85 |
| 29822 | 173400 | 173697 | 8.31E-42  | 0.85 |
| 29822 | 173925 | 174620 | 3.21E-83  | 0.89 |
| 29822 | 313321 | 313609 | 1.12E-33  | 0.88 |
| 29822 | 324397 | 324905 | 1.62E-19  | 0.61 |
| 29822 | 406402 | 407919 | 3.47E-116 | 0.92 |
| 29822 | 425406 | 426130 | 1.67E-49  | 0.87 |
| 29822 | 429234 | 429519 | 6.46E-32  | 0.93 |
| 29822 | 429822 | 430247 | 5.67E-34  | 0.94 |
| 29822 | 443634 | 444150 | 5.02E-41  | 0.91 |
| 29822 | 444483 | 444731 | 4.06E-39  | 0.92 |
| 29822 | 445532 | 445887 | 4.03E-62  | 0.85 |
| 29822 | 475968 | 476461 | 1.95E-15  | 0.83 |
| 29822 | 478558 | 479121 | 3.55E-29  | 0.85 |
| 29822 | 489191 | 489757 | 2.42E-56  | 0.93 |
| 29822 | 489964 | 490395 | 2.65E-40  | 0.91 |
| 29822 | 490660 | 491218 | 1.34E-46  | 0.73 |
| 29822 | 503269 | 503984 | 2.03E-34  | 0.81 |
| 29822 | 505653 | 505894 | 2.20E-48  | 0.95 |
| 29822 | 511111 | 511457 | 3.60E-12  | 0.83 |
| 29822 | 512359 | 512637 | 7.43E-14  | 0.92 |
| 29822 | 515789 | 516304 | 6.90E-23  | 0.82 |
| 29822 | 572504 | 573067 | 1.17E-55  | 0.9  |
| 29822 | 573327 | 573621 | 7.23E-32  | 0.95 |
| 29822 | 589024 | 589954 | 2.09E-39  | 0.84 |
| 29822 | 590402 | 590697 | 3.52E-66  | 0.89 |
| 29822 | 599331 | 599727 | 4.18E-22  | 0.8  |
| 29822 | 599975 | 600451 | 2.50E-59  | 0.93 |
| 29822 | 703417 | 703732 | 1.14E-14  | 0.79 |
| 29822 | 703477 | 703734 | 4.15E-13  | 0.82 |
| 29822 | 703976 | 704671 | 1.61E-40  | 0.82 |
| 29822 | 712985 | 713293 | 1.54E-21  | 0.75 |
| 29822 | 713589 | 713987 | 2.55E-53  | 0.96 |
| 29822 | 714236 | 714581 | 4.58E-31  | 0.84 |
| 29822 | 741904 | 742682 | 2.67E-40  | 0.83 |
| 29822 | 758074 | 758533 | 2.17E-09  | 0.69 |
| 29822 | 800262 | 801060 | 1.33E-40  | 0.72 |
| 29822 | 824505 | 826758 | 1.49E-61  | 0.76 |

|       |         |         |           |      |
|-------|---------|---------|-----------|------|
| 29822 | 846654  | 847349  | 5.83E-70  | 0.91 |
| 29822 | 852083  | 852509  | 6.70E-09  | 0.78 |
| 29822 | 863771  | 864982  | 2.56E-85  | 0.76 |
| 29822 | 880432  | 881969  | 4.78E-74  | 0.84 |
| 29822 | 890947  | 891768  | 5.07E-50  | 0.79 |
| 29822 | 894676  | 895151  | 1.93E-20  | 0.92 |
| 29822 | 895428  | 896172  | 4.21E-66  | 0.61 |
| 29822 | 901214  | 901621  | 4.65E-117 | 0.88 |
| 29822 | 920880  | 921494  | 1.22E-35  | 0.94 |
| 29822 | 922207  | 922748  | 2.60E-32  | 0.84 |
| 29822 | 926605  | 927107  | 1.24E-10  | 0.88 |
| 29822 | 937511  | 937890  | 2.99E-41  | 0.77 |
| 29822 | 955670  | 956229  | 6.01E-39  | 0.86 |
| 29822 | 958692  | 959364  | 4.74E-12  | 0.79 |
| 29822 | 961413  | 962742  | 1.51E-90  | 0.89 |
| 29822 | 976747  | 977131  | 1.16E-07  | 0.76 |
| 29822 | 1015438 | 1017191 | 3.96E-42  | 0.76 |
| 29822 | 1062978 | 1064278 | 3.21E-50  | 0.82 |
| 29822 | 1065940 | 1066534 | 2.93E-22  | 0.81 |
| 29822 | 1076322 | 1077935 | 5.37E-47  | 0.74 |
| 29822 | 1086461 | 1087436 | 3.84E-64  | 0.91 |
| 29822 | 1092989 | 1093427 | 2.20E-13  | 0.68 |
| 29822 | 1108677 | 1109052 | 3.78E-49  | 0.89 |
| 29822 | 1115646 | 1116563 | 9.60E-45  | 0.62 |
| 29822 | 1134087 | 1134505 | 1.93E-33  | 0.78 |
| 29822 | 1140519 | 1141028 | 3.39E-56  | 0.87 |
| 29822 | 1141412 | 1142082 | 2.38E-31  | 0.96 |
| 29822 | 1150457 | 1151827 | 7.47E-46  | 0.66 |
| 29822 | 1157000 | 1158544 | 3.46E-67  | 0.75 |
| 29822 | 1159845 | 1160093 | 1.09E-15  | 0.75 |
| 29822 | 1165089 | 1166096 | 3.36E-29  | 0.73 |
| 29822 | 1166755 | 1167180 | 3.62E-26  | 0.71 |
| 29822 | 1170461 | 1171114 | 3.17E-34  | 0.94 |
| 29822 | 1172698 | 1173206 | 2.55E-36  | 0.92 |
| 29822 | 1173902 | 1174174 | 3.62E-38  | 0.9  |
| 29822 | 1174812 | 1175209 | 7.87E-49  | 0.89 |
| 29822 | 1175506 | 1175883 | 5.70E-39  | 0.9  |
| 29822 | 1188088 | 1189210 | 1.64E-64  | 0.86 |
| 29822 | 1189557 | 1190016 | 4.05E-44  | 0.93 |
| 29822 | 1190339 | 1190627 | 2.06E-14  | 0.78 |
| 29822 | 1190828 | 1192087 | 3.48E-64  | 0.87 |
| 29822 | 1193114 | 1193476 | 1.04E-35  | 0.93 |
| 29822 | 1194416 | 1195179 | 2.08E-54  | 0.94 |
| 29822 | 1195485 | 1196278 | 3.24E-59  | 0.93 |
| 29822 | 1199675 | 1199981 | 1.90E-14  | 0.92 |
| 29822 | 1200230 | 1200586 | 2.51E-56  | 0.92 |
| 29823 | 2322    | 2991    | 1.41E-13  | 0.62 |
| 29823 | 4607    | 5082    | 1.70E-23  | 0.68 |
| 29823 | 24539   | 24818   | 8.70E-08  | 0.93 |
| 29823 | 47848   | 48642   | 3.29E-62  | 0.94 |
| 29823 | 124503  | 124929  | 2.88E-20  | 0.68 |
| 29823 | 137021  | 137424  | 1.28E-32  | 0.86 |
| 29823 | 180491  | 181001  | 1.26E-34  | 0.93 |

|       |        |        |           |      |
|-------|--------|--------|-----------|------|
| 29823 | 181862 | 182542 | 2.68E-12  | 0.85 |
| 29823 | 203855 | 204100 | 1.92E-27  | 0.81 |
| 29825 | 14908  | 15551  | 1.96E-13  | 0.64 |
| 29825 | 17947  | 18326  | 1.60E-12  | 0.73 |
| 29825 | 33056  | 34018  | 4.71E-44  | 0.6  |
| 29825 | 34892  | 35619  | 2.93E-40  | 0.87 |
| 29825 | 41008  | 41367  | 1.01E-15  | 0.85 |
| 29825 | 54200  | 55872  | 4.48E-72  | 0.79 |
| 29825 | 58336  | 59933  | 1.61E-39  | 0.79 |
| 29825 | 58818  | 59942  | 2.63E-26  | 0.8  |
| 29825 | 73017  | 73933  | 2.35E-22  | 0.68 |
| 29825 | 125333 | 125836 | 4.45E-14  | 0.83 |
| 29825 | 142162 | 142858 | 6.69E-58  | 0.85 |
| 29825 | 142924 | 143465 | 2.36E-20  | 0.77 |
| 29825 | 143489 | 143936 | 1.54E-26  | 0.8  |
| 29825 | 150233 | 150619 | 2.20E-21  | 0.61 |
| 29825 | 165959 | 166455 | 3.54E-34  | 0.91 |
| 29826 | 5902   | 6324   | 5.00E-16  | 0.86 |
| 29826 | 35844  | 36381  | 8.95E-41  | 0.91 |
| 29826 | 64099  | 64389  | 1.01E-41  | 0.77 |
| 29826 | 88259  | 88569  | 1.23E-10  | 0.78 |
| 29826 | 103600 | 104036 | 3.06E-07  | 0.61 |
| 29826 | 113076 | 113700 | 6.50E-17  | 0.83 |
| 29826 | 126766 | 127614 | 9.87E-98  | 0.95 |
| 29826 | 137503 | 138239 | 1.18E-62  | 0.94 |
| 29826 | 140328 | 141269 | 2.96E-26  | 0.65 |
| 29826 | 142207 | 142497 | 2.94E-14  | 0.8  |
| 29826 | 171843 | 172082 | 5.48E-34  | 0.92 |
| 29826 | 172386 | 172640 | 2.34E-29  | 0.89 |
| 29826 | 187624 | 188249 | 3.56E-57  | 0.89 |
| 29826 | 215741 | 216039 | 1.19E-24  | 0.95 |
| 29826 | 221421 | 221920 | 3.40E-15  | 0.77 |
| 29826 | 292335 | 292765 | 8.17E-43  | 0.99 |
| 29826 | 293592 | 293989 | 3.30E-65  | 0.94 |
| 29826 | 326793 | 327820 | 5.77E-75  | 0.92 |
| 29826 | 336738 | 337622 | 2.33E-19  | 0.71 |
| 29826 | 360909 | 362898 | 1.69E-51  | 0.82 |
| 29826 | 366952 | 367471 | 4.89E-28  | 0.89 |
| 29826 | 391541 | 392014 | 3.81E-32  | 0.93 |
| 29826 | 416299 | 416775 | 2.35E-24  | 0.88 |
| 29826 | 418732 | 418979 | 7.13E-39  | 0.92 |
| 29826 | 427226 | 427709 | 4.25E-37  | 0.92 |
| 29826 | 463961 | 464240 | 1.23E-28  | 0.9  |
| 29826 | 479924 | 480311 | 1.22E-13  | 0.63 |
| 29826 | 542376 | 544050 | 7.11E-64  | 0.82 |
| 29826 | 546002 | 547393 | 4.96E-165 | 0.91 |
| 29826 | 548017 | 548325 | 5.38E-11  | 0.93 |
| 29826 | 553447 | 553823 | 9.45E-23  | 0.88 |
| 29826 | 554849 | 555146 | 2.02E-14  | 0.76 |
| 29826 | 592677 | 593024 | 3.13E-26  | 0.8  |
| 29827 | 2892   | 3473   | 1.71E-09  | 0.69 |
| 29827 | 15486  | 17100  | 3.88E-124 | 0.64 |
| 29827 | 47551  | 47840  | 4.59E-10  | 0.84 |

|       |        |        |           |      |
|-------|--------|--------|-----------|------|
| 29827 | 49601  | 49915  | 1.59E-09  | 0.79 |
| 29827 | 53022  | 53722  | 1.06E-27  | 0.7  |
| 29827 | 104236 | 104656 | 4.51E-73  | 0.83 |
| 29827 | 105537 | 107389 | 4.23E-109 | 0.85 |
| 29827 | 108032 | 108879 | 3.33E-80  | 0.97 |
| 29827 | 109251 | 109575 | 5.16E-35  | 0.8  |
| 29827 | 116375 | 116713 | 3.32E-29  | 0.87 |
| 29827 | 119992 | 120285 | 8.52E-31  | 0.92 |
| 29827 | 128495 | 129038 | 5.51E-51  | 0.7  |
| 29827 | 135472 | 135802 | 1.34E-18  | 0.63 |
| 29827 | 174149 | 175390 | 1.51E-27  | 0.79 |
| 29827 | 178483 | 178873 | 3.34E-11  | 0.83 |
| 29827 | 179078 | 180647 | 2.57E-67  | 0.61 |
| 29827 | 187811 | 188132 | 6.40E-09  | 0.76 |
| 29827 | 188525 | 188896 | 4.13E-19  | 0.95 |
| 29827 | 215162 | 215400 | 2.65E-72  | 0.94 |
| 29827 | 239402 | 239866 | 6.19E-37  | 0.95 |
| 29827 | 240146 | 240685 | 6.06E-54  | 0.91 |
| 29827 | 241863 | 242472 | 1.48E-60  | 0.91 |
| 29827 | 245045 | 245899 | 1.02E-76  | 0.92 |
| 29827 | 250807 | 251808 | 3.56E-21  | 0.61 |
| 29827 | 252510 | 253179 | 1.51E-27  | 0.8  |
| 29827 | 255878 | 256461 | 5.74E-24  | 0.69 |
| 29827 | 258106 | 258632 | 2.34E-33  | 0.85 |
| 29827 | 259712 | 259949 | 5.33E-17  | 0.92 |
| 29827 | 260354 | 261342 | 4.77E-121 | 0.88 |
| 29827 | 261685 | 261962 | 7.67E-32  | 0.9  |
| 29827 | 262202 | 262904 | 1.41E-78  | 0.89 |
| 29827 | 271190 | 271709 | 4.45E-53  | 0.87 |
| 29827 | 273033 | 274136 | 4.25E-37  | 0.88 |
| 29827 | 277793 | 278827 | 9.85E-48  | 0.87 |
| 29827 | 318780 | 319761 | 4.40E-35  | 0.83 |
| 29827 | 324854 | 325275 | 3.65E-21  | 0.7  |
| 29827 | 327502 | 328252 | 4.32E-38  | 0.89 |
| 29827 | 339892 | 340427 | 6.48E-17  | 0.74 |
| 29827 | 344980 | 345816 | 4.57E-16  | 0.79 |
| 29827 | 346156 | 346574 | 7.46E-20  | 0.9  |
| 29827 | 346953 | 347381 | 3.75E-17  | 0.82 |
| 29827 | 347757 | 348100 | 4.02E-19  | 0.92 |
| 29827 | 369774 | 370052 | 2.96E-19  | 0.8  |
| 29827 | 378212 | 380343 | 5.59E-98  | 0.82 |
| 29827 | 393716 | 394094 | 1.91E-15  | 0.68 |
| 29827 | 394436 | 395515 | 1.74E-30  | 0.78 |
| 29827 | 408477 | 409538 | 1.19E-45  | 0.87 |
| 29827 | 409000 | 409881 | 1.98E-41  | 0.85 |
| 29827 | 410629 | 411092 | 4.42E-09  | 0.76 |
| 29827 | 412908 | 413201 | 1.52E-16  | 0.85 |
| 29827 | 413609 | 414894 | 5.21E-48  | 0.88 |
| 29827 | 416635 | 417111 | 3.28E-20  | 0.73 |
| 29827 | 419422 | 419652 | 4.35E-10  | 0.78 |
| 29827 | 419954 | 420156 | 5.02E-33  | 0.77 |
| 29827 | 423817 | 424318 | 1.17E-41  | 0.75 |
| 29827 | 438940 | 439745 | 3.27E-21  | 0.81 |

|       |        |        |           |      |
|-------|--------|--------|-----------|------|
| 29827 | 442275 | 443371 | 9.55E-54  | 0.82 |
| 29827 | 443790 | 445257 | 1.15E-64  | 0.82 |
| 29827 | 449249 | 449589 | 2.11E-13  | 0.8  |
| 29827 | 456071 | 456763 | 4.56E-42  | 0.8  |
| 29827 | 460137 | 460625 | 4.59E-18  | 0.9  |
| 29827 | 462214 | 462880 | 3.95E-66  | 0.88 |
| 29827 | 487458 | 488038 | 4.98E-14  | 0.76 |
| 29827 | 505348 | 505611 | 4.12E-17  | 0.86 |
| 29827 | 506729 | 507078 | 7.06E-12  | 0.7  |
| 29827 | 523965 | 524573 | 2.04E-22  | 0.84 |
| 29827 | 530105 | 530648 | 2.78E-23  | 0.91 |
| 29827 | 535313 | 535884 | 8.06E-36  | 0.91 |
| 29827 | 536096 | 536460 | 7.18E-34  | 0.85 |
| 29827 | 542512 | 542773 | 6.35E-18  | 0.98 |
| 29827 | 546325 | 546741 | 3.17E-13  | 0.77 |
| 29827 | 559874 | 560351 | 2.08E-31  | 0.62 |
| 29827 | 566728 | 567193 | 2.44E-16  | 0.82 |
| 29827 | 581719 | 582197 | 1.45E-19  | 0.85 |
| 29827 | 587903 | 588444 | 2.29E-15  | 0.8  |
| 29827 | 604448 | 605564 | 7.85E-53  | 0.73 |
| 29827 | 606569 | 607011 | 1.03E-22  | 0.9  |
| 29827 | 623529 | 623792 | 1.50E-25  | 0.91 |
| 29827 | 638171 | 639360 | 3.73E-70  | 0.73 |
| 29827 | 667103 | 667583 | 4.13E-31  | 0.77 |
| 29827 | 668555 | 668807 | 1.25E-32  | 0.95 |
| 29827 | 684480 | 685280 | 3.64E-22  | 0.62 |
| 29827 | 688441 | 689055 | 1.14E-45  | 0.89 |
| 29827 | 691507 | 691798 | 6.97E-31  | 0.95 |
| 29827 | 706072 | 708547 | 4.11E-122 | 0.93 |
| 29827 | 724150 | 724605 | 2.31E-21  | 0.68 |
| 29827 | 733740 | 734604 | 4.76E-73  | 0.6  |
| 29827 | 735801 | 736862 | 1.14E-61  | 0.9  |
| 29827 | 746711 | 747295 | 3.03E-17  | 0.79 |
| 29827 | 749765 | 750331 | 1.15E-62  | 0.9  |
| 29827 | 777597 | 778114 | 2.34E-16  | 0.71 |
| 29827 | 794948 | 796084 | 2.98E-32  | 0.66 |
| 29827 | 796559 | 797258 | 3.89E-66  | 0.91 |
| 29827 | 797508 | 798087 | 2.02E-26  | 0.79 |
| 29827 | 840441 | 840675 | 1.76E-30  | 0.83 |
| 29827 | 840890 | 841228 | 4.44E-22  | 0.92 |
| 29827 | 859965 | 860451 | 4.97E-14  | 0.86 |
| 29827 | 865474 | 866099 | 3.44E-29  | 0.87 |
| 29827 | 867208 | 867599 | 4.32E-11  | 0.81 |
| 29827 | 868721 | 869211 | 1.94E-19  | 0.83 |
| 29827 | 869651 | 870032 | 1.38E-28  | 0.89 |
| 29827 | 901343 | 902060 | 2.35E-86  | 0.93 |
| 29828 | 10481  | 10727  | 5.93E-13  | 0.78 |
| 29828 | 11332  | 11839  | 4.62E-15  | 0.82 |
| 29828 | 28804  | 29012  | 8.24E-06  | 1    |
| 29828 | 72026  | 72314  | 8.05E-10  | 0.79 |
| 29828 | 107061 | 107600 | 1.01E-03  | 1    |
| 29828 | 125266 | 125532 | 1.36E-04  | 0.15 |
| 29828 | 143990 | 144726 | 2.64E-29  | 0.9  |

|       |        |        |          |      |
|-------|--------|--------|----------|------|
| 29828 | 145136 | 146596 | 2.01E-85 | 0.63 |
| 29828 | 229467 | 230062 | 1.32E-18 | 0.81 |
| 29828 | 230295 | 230670 | 2.14E-18 | 0.69 |
| 29828 | 236641 | 237118 | 5.00E-32 | 0.9  |
| 29828 | 238131 | 239105 | 1.32E-52 | 0.89 |
| 29828 | 280949 | 282187 | 8.26E-65 | 0.76 |
| 29828 | 311781 | 312060 | 7.46E-28 | 0.91 |
| 29829 | 66636  | 66906  | 2.81E-11 | 0.93 |
| 29829 | 71152  | 71384  | 1.13E-11 | 0.79 |
| 29829 | 85011  | 85256  | 1.43E-11 | 0.83 |
| 29829 | 108404 | 108738 | 3.86E-22 | 0.92 |
| 29829 | 125099 | 125447 | 8.25E-05 | 0.84 |
| 29829 | 126112 | 126341 | 3.67E-10 | 0.95 |
| 29829 | 137632 | 137872 | 1.65E-04 | 0.77 |
| 29829 | 143228 | 143879 | 2.81E-05 | 0.79 |
| 29829 | 143292 | 143957 | 2.26E-05 | 0.79 |
| 29829 | 144027 | 144256 | 6.82E-10 | 0.87 |
| 29830 | 4371   | 4817   | 3.56E-22 | 0.74 |
| 29830 | 27408  | 28277  | 2.32E-48 | 0.86 |
| 29830 | 28509  | 29046  | 3.80E-44 | 0.86 |
| 29830 | 29249  | 30584  | 2.18E-51 | 0.74 |
| 29830 | 40422  | 41008  | 2.24E-29 | 0.87 |
| 29830 | 41241  | 41716  | 3.32E-82 | 0.91 |
| 29830 | 42395  | 43393  | 5.82E-25 | 0.8  |
| 29830 | 47641  | 48141  | 5.13E-25 | 0.76 |
| 29830 | 59049  | 59269  | 1.45E-17 | 0.74 |
| 29830 | 84717  | 85022  | 1.28E-09 | 0.79 |
| 29830 | 85264  | 85864  | 4.99E-29 | 0.8  |
| 29830 | 87284  | 87533  | 9.76E-33 | 0.91 |
| 29830 | 89378  | 89755  | 5.76E-30 | 0.83 |
| 29830 | 90917  | 91693  | 2.50E-65 | 0.9  |
| 29830 | 93448  | 93701  | 1.03E-15 | 0.81 |
| 29830 | 98002  | 98408  | 2.87E-09 | 0.79 |
| 29830 | 98867  | 100170 | 1.55E-66 | 0.92 |
| 29830 | 101360 | 102069 | 7.93E-67 | 0.9  |
| 29830 | 102580 | 103360 | 6.18E-30 | 0.88 |
| 29830 | 108315 | 109033 | 3.83E-67 | 0.89 |
| 29830 | 119385 | 120121 | 4.23E-28 | 0.87 |
| 29830 | 126003 | 126507 | 1.55E-40 | 0.91 |
| 29830 | 156706 | 156906 | 3.73E-06 | 0.72 |
| 29830 | 173603 | 174348 | 3.88E-38 | 0.77 |
| 29830 | 194272 | 194946 | 3.73E-13 | 0.64 |
| 29830 | 223571 | 224790 | 4.20E-52 | 0.74 |
| 29830 | 254610 | 255137 | 1.41E-61 | 0.88 |
| 29830 | 267071 | 267478 | 1.46E-19 | 0.79 |
| 29830 | 271947 | 272734 | 1.28E-23 | 0.62 |
| 29830 | 284082 | 284485 | 7.47E-17 | 0.77 |
| 29830 | 342760 | 343354 | 3.42E-51 | 0.91 |
| 29830 | 356173 | 357017 | 4.23E-29 | 0.8  |
| 29830 | 356264 | 357322 | 1.75E-30 | 0.79 |
| 29830 | 379440 | 380269 | 9.24E-55 | 0.92 |
| 29830 | 388426 | 388773 | 7.13E-26 | 0.88 |
| 29830 | 389896 | 390796 | 1.80E-38 | 0.79 |

|       |        |        |           |      |
|-------|--------|--------|-----------|------|
| 29830 | 399532 | 401276 | 2.47E-104 | 0.77 |
| 29830 | 404830 | 405269 | 3.73E-30  | 0.75 |
| 29830 | 405516 | 407241 | 8.91E-160 | 0.91 |
| 29830 | 407631 | 408442 | 4.29E-34  | 0.89 |
| 29830 | 408656 | 410403 | 7.00E-55  | 0.7  |
| 29830 | 422693 | 423132 | 2.53E-27  | 0.9  |
| 29830 | 423347 | 423666 | 5.66E-65  | 0.9  |
| 29830 | 423963 | 425892 | 1.04E-176 | 0.9  |
| 29830 | 426191 | 426496 | 1.73E-30  | 0.95 |
| 29830 | 428373 | 429874 | 1.68E-63  | 0.81 |
| 29830 | 435378 | 435713 | 2.47E-20  | 0.8  |
| 29830 | 436070 | 436538 | 1.45E-27  | 0.79 |
| 29830 | 448307 | 449153 | 9.05E-62  | 0.73 |
| 29830 | 463311 | 463984 | 1.52E-33  | 0.86 |
| 29830 | 464705 | 466220 | 5.95E-58  | 0.75 |
| 29830 | 468395 | 469543 | 1.35E-50  | 0.86 |
| 29830 | 470637 | 471142 | 4.55E-24  | 0.86 |
| 29830 | 473953 | 474797 | 2.45E-50  | 0.85 |
| 29830 | 480710 | 482217 | 4.75E-52  | 0.64 |
| 29830 | 495048 | 495425 | 4.31E-18  | 0.88 |
| 29830 | 500046 | 500362 | 1.32E-16  | 0.85 |
| 29830 | 501317 | 501693 | 7.06E-13  | 0.66 |
| 29830 | 513509 | 513947 | 1.31E-14  | 0.82 |
| 29830 | 538099 | 538887 | 1.93E-42  | 0.87 |
| 29830 | 559608 | 560154 | 1.16E-45  | 0.88 |
| 29830 | 560416 | 561005 | 4.82E-53  | 0.77 |
| 29830 | 572741 | 573200 | 3.38E-28  | 0.82 |
| 29830 | 577910 | 578532 | 2.72E-63  | 0.83 |
| 29830 | 588524 | 589066 | 5.28E-33  | 0.8  |
| 29830 | 590845 | 591620 | 1.32E-52  | 0.79 |
| 29830 | 612891 | 613882 | 2.34E-81  | 0.89 |
| 29830 | 621183 | 621464 | 6.03E-22  | 0.87 |
| 29830 | 633037 | 633317 | 1.18E-15  | 0.95 |
| 29830 | 642564 | 643097 | 7.83E-29  | 0.82 |
| 29830 | 660633 | 660888 | 2.85E-07  | 0.76 |
| 29831 | 5833   | 6332   | 7.11E-34  | 0.83 |
| 29831 | 7689   | 8054   | 1.57E-19  | 0.78 |
| 29832 | 255    | 668    | 5.14E-23  | 0.84 |
| 29832 | 34959  | 35269  | 1.20E-15  | 0.95 |
| 29832 | 36281  | 36744  | 1.21E-18  | 0.77 |
| 29832 | 38187  | 38855  | 2.45E-29  | 0.87 |
| 29832 | 39917  | 40159  | 4.90E-11  | 0.85 |
| 29832 | 42792  | 43737  | 3.02E-73  | 0.96 |
| 29832 | 46069  | 47150  | 5.93E-118 | 0.94 |
| 29832 | 52453  | 53384  | 6.14E-55  | 0.6  |
| 29832 | 53671  | 54255  | 3.68E-22  | 0.61 |
| 29832 | 59728  | 60721  | 6.86E-61  | 0.74 |
| 29832 | 123366 | 123785 | 3.03E-21  | 0.89 |
| 29832 | 127310 | 127630 | 4.85E-13  | 0.75 |
| 29832 | 141001 | 141242 | 1.64E-16  | 0.91 |
| 29832 | 143869 | 144135 | 1.55E-04  | 0.89 |
| 29832 | 143996 | 144388 | 3.06E-04  | 0.85 |
| 29832 | 145431 | 145634 | 1.04E-26  | 0.94 |

|       |        |        |           |      |
|-------|--------|--------|-----------|------|
| 29833 | 6555   | 6833   | 5.14E-05  | 0    |
| 29834 | 13571  | 13929  | 6.09E-27  | 0.6  |
| 29834 | 42219  | 42420  | 2.08E-06  | 0.79 |
| 29834 | 59460  | 59918  | 5.34E-08  | 0.85 |
| 29834 | 62228  | 62747  | 1.40E-10  | 0.89 |
| 29834 | 80182  | 80453  | 1.66E-07  | 0.82 |
| 29834 | 93851  | 94122  | 9.37E-06  | 0.87 |
| 29834 | 111511 | 111788 | 1.36E-09  | 0.84 |
| 29835 | 19443  | 19761  | 1.91E-31  | 0.96 |
| 29835 | 20355  | 22100  | 4.85E-101 | 0.92 |
| 29835 | 90368  | 91156  | 1.14E-80  | 0.96 |
| 29835 | 91654  | 92708  | 2.74E-62  | 0.83 |
| 29835 | 96029  | 97041  | 7.58E-51  | 0.78 |
| 29835 | 137211 | 137566 | 2.61E-27  | 0.86 |
| 29835 | 148462 | 148704 | 1.52E-21  | 0.87 |
| 29835 | 159515 | 159977 | 3.14E-13  | 0.84 |
| 29835 | 192903 | 193185 | 7.45E-09  | 0.75 |
| 29835 | 194343 | 195532 | 2.78E-22  | 0.6  |
| 29835 | 225065 | 225317 | 2.04E-07  | 0.77 |
| 29835 | 239057 | 239380 | 3.53E-26  | 0.79 |
| 29835 | 277282 | 278336 | 2.10E-36  | 0.6  |
| 29835 | 286879 | 287333 | 9.57E-13  | 0.81 |
| 29835 | 305923 | 306681 | 2.59E-63  | 0.8  |
| 29835 | 306948 | 307708 | 5.48E-41  | 0.73 |
| 29835 | 328427 | 329626 | 3.34E-68  | 0.88 |
| 29836 | 21429  | 21811  | 1.33E-21  | 0.88 |
| 29836 | 22704  | 23422  | 3.27E-15  | 0.81 |
| 29836 | 26595  | 26962  | 1.91E-35  | 0.94 |
| 29836 | 27226  | 27758  | 8.32E-33  | 0.83 |
| 29836 | 34146  | 34738  | 8.05E-74  | 0.9  |
| 29836 | 64570  | 66390  | 2.36E-112 | 0.83 |
| 29836 | 66614  | 67183  | 1.51E-21  | 0.93 |
| 29836 | 77967  | 78261  | 5.17E-19  | 0.85 |
| 29836 | 83812  | 84672  | 1.26E-31  | 0.79 |
| 29836 | 97596  | 97902  | 6.23E-07  | 0.7  |
| 29836 | 112654 | 113308 | 7.88E-37  | 0.95 |
| 29836 | 144260 | 144649 | 1.58E-23  | 0.9  |
| 29836 | 169631 | 170304 | 8.66E-77  | 0.96 |
| 29836 | 197575 | 198156 | 3.94E-07  | 0.72 |
| 29836 | 199810 | 200210 | 2.79E-13  | 0.74 |
| 29836 | 200504 | 200767 | 2.65E-07  | 0.66 |
| 29836 | 201123 | 201379 | 1.16E-25  | 0.69 |
| 29836 | 230987 | 231412 | 2.97E-06  | 0.76 |
| 29836 | 271944 | 272205 | 8.75E-16  | 0.82 |
| 29836 | 272572 | 273022 | 1.77E-24  | 0.94 |
| 29836 | 275690 | 276125 | 1.98E-21  | 0.96 |
| 29836 | 295607 | 295822 | 1.51E-15  | 0.72 |
| 29836 | 336629 | 337674 | 2.44E-60  | 0.92 |
| 29836 | 337891 | 338312 | 3.16E-10  | 0.72 |
| 29836 | 346079 | 346673 | 2.28E-21  | 0.86 |
| 29836 | 350258 | 351150 | 1.02E-48  | 0.79 |
| 29836 | 374712 | 374939 | 5.97E-31  | 0.8  |
| 29836 | 389608 | 390691 | 1.44E-49  | 0.91 |



|       |        |        |           |      |
|-------|--------|--------|-----------|------|
| 29836 | 438096 | 438384 | 6.99E-21  | 0.91 |
| 29836 | 440509 | 440866 | 8.15E-36  | 0.91 |
| 29836 | 451752 | 452416 | 2.43E-31  | 0.88 |
| 29836 | 452810 | 453239 | 5.31E-23  | 0.87 |
| 29836 | 453589 | 453873 | 7.95E-15  | 0.78 |
| 29836 | 455265 | 456123 | 7.23E-23  | 0.8  |
| 29837 | 3744   | 4194   | 5.47E-05  | 1    |
| 29837 | 34761  | 35229  | 1.54E-06  | 0.86 |
| 29837 | 44761  | 45006  | 6.32E-06  | 0.82 |
| 29837 | 70154  | 70617  | 2.11E-04  | 1    |
| 29837 | 72302  | 72534  | 5.12E-05  | 0.84 |
| 29837 | 82082  | 82296  | 1.47E-07  | 0.81 |
| 29837 | 132564 | 132775 | 2.18E-08  | 0.7  |
| 29837 | 167153 | 167623 | 1.49E-19  | 0.81 |
| 29837 | 172977 | 173243 | 3.88E-16  | 0.96 |
| 29837 | 189979 | 190203 | 9.40E-17  | 0.91 |
| 29838 | 391    | 832    | 2.09E-39  | 0.93 |
| 29838 | 3340   | 3589   | 4.35E-29  | 0.9  |
| 29838 | 4190   | 4971   | 4.63E-62  | 0.93 |
| 29838 | 6616   | 7764   | 2.37E-76  | 0.75 |
| 29838 | 36061  | 36594  | 4.08E-34  | 0.73 |
| 29838 | 36802  | 37115  | 2.28E-13  | 0.78 |
| 29838 | 37318  | 37628  | 4.83E-48  | 0.95 |
| 29838 | 37854  | 38132  | 1.09E-12  | 0.8  |
| 29838 | 44120  | 44525  | 1.03E-23  | 0.67 |
| 29838 | 148148 | 149941 | 1.71E-67  | 0.69 |
| 29838 | 152662 | 153326 | 1.15E-100 | 0.93 |
| 29838 | 154077 | 154287 | 1.63E-18  | 0.9  |
| 29838 | 155166 | 155603 | 2.89E-34  | 0.65 |
| 29838 | 183206 | 184122 | 2.61E-70  | 0.83 |
| 29838 | 184354 | 185140 | 5.15E-62  | 0.9  |
| 29838 | 214856 | 215114 | 2.18E-13  | 0.82 |
| 29838 | 226960 | 228209 | 1.38E-55  | 0.87 |
| 29838 | 229941 | 230971 | 2.89E-41  | 0.95 |
| 29838 | 231185 | 231477 | 2.78E-35  | 0.88 |
| 29838 | 232084 | 232370 | 1.12E-22  | 0.82 |
| 29838 | 232873 | 233350 | 9.32E-34  | 0.87 |
| 29838 | 236873 | 237990 | 2.64E-37  | 0.9  |
| 29838 | 238448 | 239177 | 7.05E-44  | 0.8  |
| 29838 | 239921 | 240649 | 3.56E-42  | 0.88 |
| 29838 | 243569 | 244252 | 4.14E-39  | 0.93 |
| 29838 | 247071 | 247375 | 5.79E-13  | 0.94 |
| 29838 | 253780 | 255341 | 6.14E-69  | 0.84 |
| 29838 | 256290 | 257102 | 5.04E-27  | 0.62 |
| 29838 | 257838 | 258440 | 2.63E-27  | 0.9  |
| 29838 | 258645 | 259162 | 2.41E-32  | 0.89 |
| 29838 | 260092 | 260541 | 1.82E-35  | 0.93 |
| 29838 | 260898 | 262014 | 8.20E-65  | 0.87 |
| 29838 | 262273 | 263443 | 6.02E-59  | 0.94 |
| 29838 | 269643 | 270003 | 1.21E-17  | 0.82 |
| 29838 | 271862 | 272661 | 1.97E-54  | 0.84 |
| 29838 | 275584 | 275929 | 1.89E-36  | 0.83 |
| 29838 | 321955 | 322271 | 2.00E-09  | 0.75 |

|       |        |        |           |      |
|-------|--------|--------|-----------|------|
| 29838 | 348164 | 348823 | 8.95E-29  | 0.9  |
| 29838 | 357464 | 357946 | 4.83E-15  | 0.86 |
| 29838 | 388842 | 389096 | 2.21E-05  | 0.86 |
| 29838 | 395276 | 395514 | 1.43E-10  | 0.78 |
| 29838 | 482841 | 483437 | 3.49E-34  | 0.71 |
| 29838 | 483745 | 483960 | 7.76E-17  | 0.87 |
| 29838 | 484165 | 484720 | 2.37E-43  | 0.91 |
| 29838 | 489138 | 489770 | 3.96E-36  | 0.91 |
| 29838 | 497074 | 497291 | 1.57E-15  | 0.81 |
| 29838 | 497653 | 498207 | 2.00E-22  | 0.72 |
| 29838 | 498824 | 500172 | 1.20E-58  | 0.84 |
| 29838 | 506193 | 507440 | 1.89E-104 | 0.87 |
| 29838 | 510434 | 510864 | 1.82E-14  | 0.82 |
| 29838 | 512489 | 513309 | 7.40E-19  | 0.85 |
| 29838 | 513623 | 514176 | 4.08E-36  | 0.86 |
| 29838 | 514733 | 515280 | 4.62E-41  | 0.92 |
| 29838 | 538937 | 539199 | 1.33E-06  | 0.99 |
| 29838 | 547823 | 548694 | 1.23E-12  | 0.78 |
| 29838 | 549306 | 550066 | 9.42E-46  | 0.94 |
| 29838 | 552358 | 553762 | 6.84E-24  | 0.83 |
| 29839 | 48117  | 49326  | 1.00E-112 | 0.89 |
| 29839 | 49651  | 50051  | 4.64E-61  | 0.98 |
| 29839 | 50725  | 51136  | 2.43E-21  | 0.81 |
| 29839 | 67997  | 68288  | 1.66E-34  | 0.97 |
| 29839 | 83266  | 84572  | 1.42E-179 | 0.94 |
| 29839 | 97730  | 98443  | 1.74E-42  | 0.92 |
| 29839 | 118995 | 119333 | 1.55E-28  | 1    |
| 29839 | 122779 | 123174 | 2.12E-26  | 0.85 |
| 29839 | 129626 | 130089 | 4.88E-33  | 0.94 |
| 29839 | 143599 | 143848 | 2.44E-12  | 0.77 |
| 29839 | 143647 | 143905 | 4.23E-15  | 0.8  |
| 29839 | 177992 | 178707 | 1.46E-80  | 0.97 |
| 29839 | 179271 | 179759 | 1.28E-19  | 0.93 |
| 29839 | 181382 | 182722 | 6.07E-112 | 0.91 |
| 29839 | 206892 | 207291 | 1.86E-12  | 0.63 |
| 29839 | 216012 | 216433 | 1.65E-25  | 0.89 |
| 29839 | 220984 | 221389 | 9.99E-10  | 0.71 |
| 29839 | 223728 | 224024 | 7.56E-19  | 0.95 |
| 29839 | 229000 | 229336 | 8.73E-21  | 0.85 |
| 29839 | 229772 | 230118 | 1.09E-26  | 0.96 |
| 29839 | 231085 | 231357 | 5.81E-11  | 0.9  |
| 29839 | 233410 | 235113 | 1.56E-102 | 0.92 |
| 29839 | 319922 | 320249 | 1.12E-52  | 0.98 |
| 29839 | 328307 | 328608 | 7.33E-13  | 0.74 |
| 29839 | 328868 | 329362 | 1.72E-46  | 0.92 |
| 29839 | 329619 | 331393 | 4.90E-107 | 0.96 |
| 29839 | 331756 | 333010 | 1.74E-110 | 0.95 |
| 29839 | 333611 | 334875 | 2.88E-124 | 0.94 |
| 29839 | 335924 | 336356 | 5.98E-29  | 0.88 |
| 29839 | 372984 | 373370 | 7.95E-23  | 0.66 |
| 29839 | 385976 | 386383 | 1.10E-28  | 0.96 |
| 29839 | 387203 | 388201 | 5.15E-26  | 0.93 |
| 29839 | 389106 | 390360 | 1.10E-74  | 0.91 |

|       |        |        |           |      |
|-------|--------|--------|-----------|------|
| 29839 | 428866 | 429269 | 1.40E-05  | 0.97 |
| 29839 | 446019 | 446382 | 5.97E-10  | 0.86 |
| 29839 | 456188 | 456799 | 1.36E-36  | 0.94 |
| 29839 | 458703 | 459015 | 1.95E-10  | 0.64 |
| 29839 | 480519 | 481040 | 8.15E-31  | 0.94 |
| 29839 | 498801 | 499621 | 9.57E-44  | 0.93 |
| 29839 | 501662 | 502328 | 2.82E-61  | 0.92 |
| 29839 | 503621 | 504404 | 2.68E-59  | 0.67 |
| 29839 | 504646 | 504973 | 9.66E-39  | 0.76 |
| 29839 | 505285 | 506625 | 1.70E-92  | 0.93 |
| 29839 | 509807 | 510301 | 3.04E-15  | 0.85 |
| 29839 | 542965 | 543374 | 6.94E-13  | 0.92 |
| 29839 | 543896 | 544804 | 8.15E-07  | 0.88 |
| 29839 | 576275 | 576663 | 1.11E-04  | 0.81 |
| 29839 | 576314 | 576786 | 1.59E-04  | 0.8  |
| 29840 | 12166  | 12693  | 3.30E-16  | 0.84 |
| 29840 | 49529  | 50167  | 5.36E-30  | 0.7  |
| 29840 | 54346  | 54684  | 1.18E-15  | 0.94 |
| 29840 | 55123  | 55779  | 3.83E-26  | 0.98 |
| 29840 | 56006  | 56511  | 1.56E-35  | 0.96 |
| 29840 | 69280  | 69798  | 8.54E-36  | 0.77 |
| 29840 | 78067  | 80851  | 3.20E-116 | 0.9  |
| 29840 | 87064  | 87427  | 1.28E-13  | 0.8  |
| 29840 | 88255  | 89372  | 6.21E-216 | 0.91 |
| 29840 | 90493  | 90755  | 7.12E-31  | 0.94 |
| 29840 | 109953 | 110321 | 2.35E-11  | 0.8  |
| 29840 | 120028 | 120466 | 1.13E-21  | 0.87 |
| 29840 | 158923 | 159393 | 1.89E-59  | 0.65 |
| 29840 | 159669 | 159890 | 9.91E-17  | 0.84 |
| 29840 | 160148 | 162665 | 2.15E-132 | 0.77 |
| 29840 | 172351 | 173099 | 1.21E-41  | 0.91 |
| 29840 | 175993 | 176771 | 2.47E-39  | 0.84 |
| 29840 | 177034 | 177612 | 5.44E-53  | 0.83 |
| 29840 | 192847 | 193199 | 2.45E-23  | 0.81 |
| 29840 | 207613 | 208763 | 2.55E-39  | 0.84 |
| 29840 | 213310 | 213620 | 4.43E-25  | 0.67 |
| 29840 | 227884 | 228232 | 2.79E-42  | 0.96 |
| 29840 | 239235 | 239864 | 1.47E-22  | 0.78 |
| 29840 | 240461 | 241464 | 4.92E-136 | 0.87 |
| 29840 | 261427 | 262548 | 1.93E-89  | 0.65 |
| 29840 | 262841 | 263188 | 2.95E-48  | 0.9  |
| 29840 | 263958 | 264472 | 2.28E-45  | 0.91 |
| 29840 | 264688 | 265471 | 2.61E-82  | 0.91 |
| 29840 | 267205 | 268363 | 1.30E-121 | 0.9  |
| 29840 | 307923 | 308387 | 1.33E-13  | 0.68 |
| 29840 | 309037 | 309254 | 4.26E-11  | 0.74 |
| 29840 | 312889 | 314104 | 4.31E-32  | 0.88 |
| 29840 | 319976 | 320673 | 6.16E-28  | 0.91 |
| 29840 | 337629 | 338455 | 2.63E-37  | 0.86 |
| 29840 | 341248 | 342533 | 5.92E-73  | 0.89 |
| 29840 | 343365 | 343632 | 6.75E-46  | 0.82 |
| 29840 | 344505 | 344790 | 1.08E-35  | 0.83 |
| 29840 | 359275 | 359940 | 3.43E-41  | 0.91 |

|       |        |        |           |      |
|-------|--------|--------|-----------|------|
| 29840 | 372675 | 373217 | 3.86E-13  | 0.64 |
| 29840 | 373836 | 374350 | 5.45E-39  | 0.92 |
| 29840 | 375455 | 375919 | 2.30E-38  | 0.95 |
| 29840 | 387771 | 388269 | 1.29E-19  | 0.87 |
| 29840 | 401203 | 401426 | 8.38E-13  | 0.84 |
| 29840 | 401711 | 402147 | 6.92E-25  | 0.92 |
| 29840 | 402401 | 402787 | 8.30E-18  | 0.92 |
| 29840 | 405255 | 406688 | 1.50E-76  | 0.86 |
| 29840 | 413833 | 414987 | 2.87E-54  | 0.86 |
| 29840 | 428754 | 429600 | 1.24E-89  | 0.92 |
| 29840 | 429854 | 430825 | 7.78E-105 | 0.96 |
| 29840 | 439267 | 439999 | 1.98E-46  | 0.89 |
| 29840 | 440278 | 442713 | 8.20E-237 | 0.84 |
| 29840 | 443034 | 443571 | 2.30E-46  | 0.84 |
| 29840 | 462201 | 462553 | 1.36E-33  | 0.83 |
| 29840 | 462812 | 463858 | 2.24E-91  | 0.78 |
| 29840 | 484548 | 484767 | 9.25E-08  | 0.84 |
| 29840 | 498161 | 498438 | 2.96E-45  | 0.93 |
| 29840 | 504346 | 505383 | 9.18E-52  | 0.8  |
| 29840 | 531636 | 531871 | 1.48E-39  | 0.94 |
| 29840 | 532160 | 532527 | 4.74E-46  | 0.92 |
| 29840 | 534746 | 534999 | 4.17E-35  | 0.71 |
| 29841 | 17483  | 17736  | 7.61E-09  | 0.7  |
| 29841 | 20358  | 21043  | 1.91E-33  | 0.88 |
| 29841 | 25446  | 25977  | 3.47E-46  | 0.86 |
| 29841 | 26286  | 26516  | 8.36E-40  | 0.74 |
| 29841 | 35555  | 36238  | 9.58E-28  | 0.87 |
| 29841 | 41031  | 41435  | 1.70E-53  | 0.84 |
| 29841 | 42331  | 42871  | 2.93E-53  | 0.94 |
| 29841 | 43397  | 43706  | 9.63E-32  | 0.8  |
| 29841 | 45952  | 46323  | 7.22E-14  | 0.88 |
| 29841 | 50347  | 50787  | 2.64E-26  | 0.77 |
| 29841 | 64007  | 64215  | 8.61E-18  | 0.84 |
| 29841 | 79439  | 81996  | 1.77E-107 | 0.81 |
| 29841 | 82527  | 82924  | 1.75E-26  | 0.83 |
| 29841 | 92537  | 92881  | 3.34E-06  | 0.62 |
| 29841 | 107657 | 108027 | 8.63E-20  | 0.88 |
| 29841 | 126558 | 126968 | 3.80E-13  | 0.88 |
| 29841 | 128296 | 128906 | 2.63E-56  | 0.87 |
| 29841 | 129197 | 129405 | 1.08E-57  | 0.91 |
| 29841 | 172038 | 172422 | 1.31E-44  | 0.88 |
| 29841 | 187679 | 188231 | 4.54E-79  | 0.91 |
| 29841 | 275973 | 276450 | 1.87E-38  | 0.92 |
| 29841 | 286035 | 287210 | 4.61E-69  | 0.69 |
| 29841 | 327488 | 329050 | 4.37E-61  | 0.83 |
| 29841 | 337723 | 338033 | 6.77E-26  | 0.87 |
| 29841 | 373557 | 374761 | 2.57E-68  | 0.75 |
| 29841 | 375427 | 376188 | 3.40E-81  | 0.8  |
| 29841 | 382719 | 383668 | 8.75E-31  | 0.74 |
| 29841 | 392505 | 392727 | 4.33E-11  | 0.9  |
| 29841 | 393337 | 393705 | 2.78E-16  | 0.81 |
| 29841 | 403031 | 404495 | 1.78E-63  | 0.71 |
| 29841 | 405675 | 406917 | 8.98E-44  | 0.73 |

|       |         |         |           |      |
|-------|---------|---------|-----------|------|
| 29841 | 425180  | 426141  | 9.35E-55  | 0.89 |
| 29841 | 434356  | 434603  | 7.77E-23  | 0.81 |
| 29841 | 445101  | 445534  | 1.31E-15  | 0.83 |
| 29841 | 447421  | 447957  | 5.39E-31  | 0.76 |
| 29841 | 456914  | 457227  | 4.05E-16  | 0.77 |
| 29841 | 460714  | 460963  | 1.94E-20  | 0.84 |
| 29841 | 477613  | 478134  | 1.78E-17  | 0.82 |
| 29841 | 478579  | 479283  | 3.03E-49  | 0.89 |
| 29841 | 507396  | 507731  | 1.72E-26  | 0.85 |
| 29841 | 530734  | 531936  | 6.15E-103 | 0.72 |
| 29841 | 532217  | 532441  | 3.96E-12  | 0.84 |
| 29841 | 568149  | 568488  | 4.35E-06  | 0.85 |
| 29841 | 575983  | 576837  | 5.38E-35  | 0.8  |
| 29841 | 595031  | 595644  | 8.25E-21  | 0.6  |
| 29841 | 604854  | 605641  | 3.69E-49  | 0.86 |
| 29841 | 612762  | 612974  | 4.42E-21  | 0.9  |
| 29841 | 613961  | 614581  | 6.53E-44  | 0.85 |
| 29841 | 616146  | 616601  | 8.34E-21  | 0.69 |
| 29841 | 641813  | 642174  | 3.60E-17  | 0.83 |
| 29841 | 642377  | 643099  | 1.99E-24  | 0.87 |
| 29841 | 644150  | 644500  | 9.11E-24  | 0.78 |
| 29841 | 661036  | 662236  | 7.16E-58  | 0.94 |
| 29841 | 664078  | 665534  | 1.31E-198 | 0.93 |
| 29841 | 695743  | 696151  | 1.51E-16  | 0.78 |
| 29841 | 697721  | 698151  | 1.12E-22  | 0.82 |
| 29841 | 708819  | 709229  | 5.19E-13  | 0.86 |
| 29841 | 717003  | 717544  | 1.36E-17  | 0.62 |
| 29841 | 740585  | 741091  | 2.45E-67  | 0.9  |
| 29841 | 755450  | 756025  | 1.53E-23  | 0.87 |
| 29841 | 762274  | 762678  | 1.86E-08  | 0.82 |
| 29841 | 782920  | 783146  | 1.37E-33  | 0.81 |
| 29841 | 800096  | 800603  | 2.01E-13  | 0.9  |
| 29841 | 854632  | 858724  | 4.47E-297 | 0.9  |
| 29841 | 870513  | 870983  | 1.12E-23  | 0.81 |
| 29841 | 885858  | 887667  | 1.15E-61  | 0.83 |
| 29841 | 909747  | 910033  | 1.44E-19  | 0.83 |
| 29841 | 911124  | 912012  | 1.20E-48  | 0.75 |
| 29841 | 912901  | 913936  | 1.64E-56  | 0.86 |
| 29841 | 914579  | 914936  | 4.69E-18  | 0.86 |
| 29841 | 928168  | 928528  | 6.30E-16  | 0.91 |
| 29841 | 947602  | 948808  | 5.65E-72  | 0.83 |
| 29841 | 1054540 | 1056195 | 7.95E-58  | 0.64 |
| 29841 | 1070629 | 1070904 | 1.68E-16  | 0.73 |
| 29841 | 1078510 | 1079660 | 1.29E-40  | 0.81 |
| 29841 | 1082569 | 1083022 | 1.40E-19  | 0.74 |
| 29841 | 1085898 | 1086298 | 1.07E-32  | 0.72 |
| 29841 | 1161614 | 1162773 | 5.21E-59  | 0.67 |
| 29841 | 1183431 | 1184552 | 1.48E-35  | 0.65 |
| 29841 | 1186950 | 1187456 | 6.21E-67  | 0.88 |
| 29841 | 1187711 | 1188515 | 2.98E-42  | 0.9  |
| 29841 | 1188767 | 1189553 | 2.88E-103 | 0.91 |
| 29841 | 1202593 | 1203007 | 7.62E-39  | 0.91 |
| 29841 | 1203303 | 1203923 | 3.02E-21  | 0.68 |

|       |        |        |           |      |
|-------|--------|--------|-----------|------|
| 29842 | 9956   | 10519  | 9.13E-16  | 0.79 |
| 29842 | 13003  | 13771  | 2.13E-34  | 0.87 |
| 29842 | 17884  | 18235  | 2.30E-26  | 0.96 |
| 29842 | 20725  | 21057  | 1.02E-45  | 0.92 |
| 29842 | 27805  | 28334  | 2.94E-29  | 0.89 |
| 29842 | 47712  | 48447  | 4.17E-83  | 0.9  |
| 29842 | 49721  | 50265  | 1.40E-19  | 0.84 |
| 29842 | 53580  | 53874  | 1.69E-11  | 0.92 |
| 29842 | 54106  | 54378  | 2.27E-12  | 0.7  |
| 29842 | 63473  | 63720  | 4.22E-10  | 0.78 |
| 29842 | 72420  | 72879  | 5.76E-40  | 0.7  |
| 29842 | 81727  | 82056  | 1.97E-22  | 0.66 |
| 29842 | 170667 | 171078 | 1.74E-16  | 0.77 |
| 29842 | 173929 | 174314 | 1.40E-13  | 0.69 |
| 29842 | 184060 | 184680 | 2.92E-22  | 0.86 |
| 29842 | 185121 | 185416 | 9.30E-09  | 0.75 |
| 29842 | 187676 | 189298 | 2.41E-116 | 0.82 |
| 29842 | 189670 | 190025 | 1.24E-15  | 0.82 |
| 29842 | 199621 | 200092 | 2.73E-30  | 0.85 |
| 29842 | 200546 | 200903 | 1.30E-25  | 0.93 |
| 29842 | 213944 | 214448 | 3.66E-31  | 0.86 |
| 29842 | 214784 | 215736 | 3.38E-44  | 0.87 |
| 29842 | 221238 | 221656 | 7.17E-20  | 0.79 |
| 29842 | 242188 | 243309 | 6.22E-64  | 0.63 |
| 29842 | 243710 | 244290 | 3.00E-27  | 0.78 |
| 29842 | 248104 | 249302 | 2.06E-40  | 0.84 |
| 29842 | 279812 | 282219 | 5.08E-85  | 0.66 |
| 29842 | 287335 | 287623 | 8.20E-41  | 0.86 |
| 29842 | 287833 | 288356 | 2.61E-21  | 0.86 |
| 29842 | 314054 | 314509 | 2.49E-16  | 0.7  |
| 29842 | 320786 | 321979 | 1.20E-76  | 0.91 |
| 29842 | 338139 | 338601 | 4.11E-22  | 0.87 |
| 29842 | 341682 | 342863 | 8.64E-46  | 0.81 |
| 29842 | 348592 | 349585 | 3.27E-84  | 0.93 |
| 29842 | 355168 | 355532 | 2.53E-20  | 0.8  |
| 29842 | 361113 | 361868 | 2.75E-72  | 0.92 |
| 29842 | 362291 | 362742 | 4.49E-37  | 0.94 |
| 29842 | 363495 | 363719 | 1.57E-24  | 1    |
| 29842 | 364522 | 365144 | 5.18E-48  | 0.92 |
| 29842 | 385371 | 387815 | 2.21E-123 | 0.89 |
| 29842 | 407630 | 408054 | 5.92E-21  | 0.72 |
| 29842 | 409780 | 410273 | 5.17E-30  | 0.78 |
| 29842 | 425996 | 426867 | 4.43E-49  | 0.9  |
| 29842 | 427990 | 428669 | 1.92E-34  | 0.8  |
| 29842 | 429872 | 430733 | 1.11E-27  | 0.76 |
| 29842 | 441165 | 442066 | 3.54E-59  | 0.89 |
| 29842 | 451388 | 453233 | 1.11E-75  | 0.76 |
| 29842 | 454506 | 454898 | 1.99E-09  | 0.78 |
| 29842 | 470401 | 470937 | 1.27E-25  | 0.87 |
| 29842 | 505588 | 505862 | 5.51E-13  | 0.74 |
| 29842 | 540138 | 540719 | 1.09E-24  | 0.82 |
| 29842 | 541530 | 541736 | 6.80E-31  | 0.9  |
| 29842 | 542184 | 542907 | 1.77E-35  | 0.76 |

|       |         |         |           |      |
|-------|---------|---------|-----------|------|
| 29842 | 550163  | 550526  | 4.12E-44  | 0.78 |
| 29842 | 555304  | 555611  | 5.02E-31  | 0.83 |
| 29842 | 558310  | 559400  | 5.73E-76  | 0.82 |
| 29842 | 563273  | 564044  | 1.59E-34  | 0.81 |
| 29842 | 576935  | 578337  | 1.56E-52  | 0.76 |
| 29842 | 584933  | 585410  | 1.01E-26  | 0.72 |
| 29842 | 595553  | 597431  | 4.45E-114 | 0.89 |
| 29842 | 597699  | 597998  | 1.39E-29  | 0.86 |
| 29842 | 623091  | 623815  | 5.46E-38  | 0.81 |
| 29842 | 624536  | 625738  | 3.81E-67  | 0.69 |
| 29842 | 629750  | 630228  | 1.01E-14  | 0.64 |
| 29842 | 644570  | 644940  | 1.27E-12  | 0.61 |
| 29842 | 645215  | 645565  | 3.52E-35  | 0.84 |
| 29842 | 647774  | 648686  | 2.34E-68  | 0.84 |
| 29842 | 680169  | 680790  | 2.62E-54  | 0.82 |
| 29842 | 707989  | 708457  | 4.92E-42  | 0.92 |
| 29842 | 714303  | 715450  | 8.96E-63  | 0.88 |
| 29842 | 757022  | 757399  | 1.35E-08  | 0.75 |
| 29842 | 819446  | 820054  | 1.07E-32  | 0.78 |
| 29842 | 854105  | 854388  | 1.05E-06  | 0.77 |
| 29842 | 861811  | 862028  | 4.86E-06  | 0.94 |
| 29842 | 867229  | 867589  | 1.02E-59  | 0.66 |
| 29842 | 880263  | 881212  | 4.25E-21  | 0.66 |
| 29842 | 896994  | 897622  | 1.05E-26  | 0.81 |
| 29842 | 948058  | 948537  | 1.40E-18  | 0.83 |
| 29842 | 978509  | 978861  | 8.62E-31  | 0.73 |
| 29842 | 999667  | 1000059 | 1.08E-37  | 0.92 |
| 29842 | 1011499 | 1011728 | 1.12E-07  | 0.85 |
| 29842 | 1054719 | 1055048 | 1.55E-26  | 0.68 |
| 29842 | 1071564 | 1072553 | 2.94E-50  | 0.79 |
| 29843 | 7779    | 8197    | 2.11E-34  | 0.97 |
| 29843 | 10829   | 11310   | 1.46E-35  | 0.93 |
| 29843 | 49628   | 50356   | 6.62E-22  | 0.8  |
| 29843 | 52921   | 53418   | 5.01E-32  | 0.95 |
| 29843 | 54038   | 54342   | 1.71E-22  | 0.86 |
| 29843 | 95292   | 95675   | 5.26E-21  | 0.84 |
| 29843 | 101269  | 101822  | 1.48E-18  | 0.82 |
| 29843 | 155908  | 156185  | 1.41E-06  | 1    |
| 29843 | 176750  | 177337  | 3.70E-54  | 0.94 |
| 29843 | 206055  | 206387  | 2.53E-30  | 0.92 |
| 29843 | 244114  | 244640  | 2.19E-46  | 0.95 |
| 29843 | 244868  | 245223  | 7.03E-18  | 0.76 |
| 29843 | 245577  | 245908  | 1.36E-26  | 0.8  |
| 29843 | 258037  | 258512  | 1.65E-31  | 0.94 |
| 29843 | 325889  | 326188  | 7.36E-51  | 0.9  |
| 29843 | 327101  | 327349  | 1.07E-34  | 0.97 |
| 29843 | 330415  | 330704  | 2.42E-18  | 0.88 |
| 29843 | 331285  | 331601  | 3.00E-26  | 0.95 |
| 29843 | 335924  | 336303  | 1.56E-35  | 0.95 |
| 29843 | 336574  | 337213  | 1.73E-61  | 0.97 |
| 29843 | 337685  | 339304  | 1.94E-161 | 0.94 |
| 29844 | 40949   | 41380   | 5.49E-42  | 0.88 |
| 29844 | 41590   | 41822   | 3.26E-27  | 0.8  |

|       |        |        |           |      |
|-------|--------|--------|-----------|------|
| 29844 | 42065  | 43024  | 3.38E-56  | 0.63 |
| 29844 | 80843  | 81361  | 8.14E-38  | 0.84 |
| 29844 | 82485  | 82717  | 7.82E-28  | 0.86 |
| 29844 | 104000 | 104600 | 3.54E-59  | 0.84 |
| 29844 | 144536 | 144900 | 3.15E-16  | 0.76 |
| 29844 | 148526 | 148765 | 4.15E-23  | 0.96 |
| 29844 | 149774 | 150297 | 2.11E-45  | 0.85 |
| 29844 | 151585 | 152521 | 6.17E-85  | 0.88 |
| 29844 | 166441 | 166696 | 1.84E-10  | 0.8  |
| 29844 | 185482 | 186031 | 1.80E-38  | 0.69 |
| 29844 | 188261 | 188901 | 5.14E-79  | 0.93 |
| 29844 | 190550 | 190966 | 2.10E-32  | 0.87 |
| 29844 | 241029 | 243379 | 1.33E-87  | 0.81 |
| 29844 | 275419 | 276347 | 1.03E-33  | 0.86 |
| 29844 | 281007 | 281847 | 1.59E-41  | 0.84 |
| 29844 | 287967 | 288328 | 9.65E-18  | 0.66 |
| 29844 | 306030 | 306624 | 3.16E-49  | 0.7  |
| 29844 | 400661 | 401627 | 1.67E-82  | 0.88 |
| 29844 | 401905 | 402146 | 9.77E-30  | 0.84 |
| 29844 | 410507 | 410834 | 2.52E-35  | 0.94 |
| 29844 | 411043 | 411636 | 4.67E-22  | 0.76 |
| 29844 | 445286 | 445962 | 1.09E-30  | 0.82 |
| 29844 | 464139 | 464653 | 2.30E-25  | 0.87 |
| 29844 | 538464 | 539331 | 2.06E-37  | 0.75 |
| 29844 | 540161 | 541110 | 1.28E-88  | 0.69 |
| 29844 | 565315 | 565780 | 2.52E-22  | 0.6  |
| 29844 | 565993 | 566460 | 4.73E-27  | 0.75 |
| 29844 | 566679 | 567743 | 7.21E-102 | 0.83 |
| 29844 | 578912 | 579197 | 1.02E-29  | 0.89 |
| 29844 | 594118 | 594534 | 5.97E-22  | 0.78 |
| 29844 | 611564 | 612031 | 3.65E-30  | 0.85 |
| 29844 | 613199 | 614320 | 3.49E-27  | 0.78 |
| 29844 | 616592 | 617444 | 6.33E-39  | 0.68 |
| 29844 | 629098 | 629335 | 9.61E-15  | 0.84 |
| 29844 | 648472 | 648852 | 6.00E-10  | 0.74 |
| 29844 | 651722 | 652134 | 1.64E-28  | 0.71 |
| 29844 | 652411 | 653813 | 1.02E-97  | 0.86 |
| 29844 | 654355 | 654779 | 3.07E-25  | 0.85 |
| 29844 | 674179 | 674847 | 2.86E-45  | 0.87 |
| 29844 | 679815 | 680969 | 3.66E-39  | 0.82 |
| 29844 | 687415 | 687793 | 2.71E-37  | 0.83 |
| 29844 | 714763 | 715461 | 3.30E-37  | 0.83 |
| 29844 | 716613 | 717604 | 9.75E-27  | 0.78 |
| 29844 | 745871 | 746156 | 7.71E-38  | 0.95 |
| 29844 | 751511 | 752013 | 1.73E-10  | 0.74 |
| 29844 | 752325 | 752936 | 4.61E-46  | 0.7  |
| 29844 | 804849 | 805504 | 4.21E-45  | 0.94 |
| 29844 | 807713 | 809589 | 2.21E-78  | 0.74 |
| 29844 | 813470 | 815235 | 9.88E-52  | 0.67 |
| 29844 | 847202 | 847409 | 3.48E-33  | 0.91 |
| 29844 | 886834 | 887132 | 4.08E-12  | 0.78 |
| 29844 | 897868 | 898757 | 1.53E-112 | 0.77 |
| 29844 | 967294 | 967541 | 4.56E-11  | 0.81 |



|       |         |         |           |      |
|-------|---------|---------|-----------|------|
| 29844 | 979832  | 980046  | 2.41E-07  | 0.88 |
| 29844 | 1018738 | 1019408 | 1.03E-49  | 0.76 |
| 29844 | 1031366 | 1031962 | 5.81E-17  | 0.84 |
| 29844 | 1039643 | 1040700 | 6.06E-81  | 0.66 |
| 29844 | 1048171 | 1048460 | 1.18E-15  | 0.68 |
| 29844 | 1051917 | 1052338 | 3.24E-23  | 0.86 |
| 29844 | 1089376 | 1089893 | 6.19E-32  | 0.87 |
| 29844 | 1097282 | 1097751 | 9.95E-57  | 0.88 |
| 29844 | 1145914 | 1146347 | 7.78E-21  | 0.75 |
| 29844 | 1157382 | 1157940 | 1.21E-16  | 0.79 |
| 29844 | 1158024 | 1158228 | 1.53E-17  | 0.79 |
| 29844 | 1159974 | 1160399 | 3.17E-11  | 0.8  |
| 29844 | 1162835 | 1163272 | 2.13E-26  | 0.79 |
| 29844 | 1165210 | 1165521 | 2.31E-23  | 0.83 |
| 29844 | 1175142 | 1175867 | 6.50E-23  | 0.77 |
| 29844 | 1183772 | 1184029 | 2.35E-29  | 0.91 |
| 29844 | 1205412 | 1206135 | 8.68E-64  | 0.91 |
| 29844 | 1206707 | 1207280 | 1.75E-28  | 0.93 |
| 29844 | 1226237 | 1226497 | 8.67E-24  | 0.91 |
| 29844 | 1226773 | 1227065 | 1.30E-30  | 0.92 |
| 29844 | 1227294 | 1227904 | 4.07E-94  | 0.93 |
| 29845 | 11095   | 11439   | 1.12E-04  | 0.86 |
| 29845 | 18221   | 18499   | 1.05E-18  | 0.84 |
| 29845 | 24687   | 25646   | 8.61E-29  | 0.86 |
| 29845 | 36379   | 36850   | 2.10E-72  | 0.81 |
| 29845 | 37144   | 37925   | 6.21E-37  | 0.82 |
| 29845 | 40862   | 41500   | 6.85E-39  | 0.92 |
| 29845 | 84635   | 85037   | 6.16E-17  | 0.84 |
| 29845 | 92506   | 92974   | 2.22E-14  | 0.77 |
| 29845 | 97063   | 97441   | 1.35E-32  | 0.93 |
| 29845 | 99142   | 99669   | 5.11E-10  | 0.81 |
| 29846 | 5811    | 6021    | 1.14E-24  | 0.88 |
| 29846 | 29659   | 30154   | 2.31E-23  | 0.88 |
| 29846 | 41163   | 41720   | 1.60E-33  | 0.84 |
| 29846 | 42366   | 42805   | 4.54E-15  | 0.82 |
| 29846 | 45149   | 45827   | 4.78E-37  | 0.88 |
| 29846 | 46079   | 47011   | 6.79E-48  | 0.84 |
| 29846 | 49486   | 50013   | 4.26E-19  | 0.85 |
| 29846 | 57180   | 58618   | 1.23E-88  | 0.87 |
| 29846 | 89775   | 90030   | 1.10E-20  | 0.85 |
| 29846 | 114979  | 115274  | 2.64E-32  | 0.84 |
| 29847 | 2412    | 2863    | 1.14E-07  | 0.76 |
| 29847 | 14562   | 14847   | 6.49E-14  | 0.88 |
| 29847 | 64037   | 64268   | 8.62E-34  | 0.9  |
| 29847 | 67302   | 67907   | 1.23E-35  | 0.89 |
| 29847 | 68115   | 68700   | 9.16E-30  | 0.68 |
| 29847 | 68982   | 69333   | 1.40E-12  | 0.74 |
| 29847 | 73905   | 74267   | 3.30E-33  | 0.9  |
| 29847 | 75022   | 75338   | 2.60E-61  | 0.94 |
| 29847 | 93970   | 94547   | 6.62E-26  | 0.83 |
| 29847 | 97459   | 98128   | 9.56E-18  | 0.98 |
| 29847 | 98984   | 99696   | 4.83E-34  | 0.92 |
| 29847 | 104480  | 105935  | 1.11E-132 | 0.92 |

|       |        |        |           |      |
|-------|--------|--------|-----------|------|
| 29847 | 129326 | 129649 | 4.29E-13  | 0.78 |
| 29847 | 154946 | 155419 | 1.34E-10  | 0.64 |
| 29848 | 14465  | 14810  | 7.16E-23  | 0.87 |
| 29848 | 26780  | 27487  | 7.41E-55  | 0.84 |
| 29848 | 40374  | 40575  | 1.46E-09  | 0.91 |
| 29848 | 48127  | 48621  | 1.24E-23  | 0.87 |
| 29848 | 48896  | 49302  | 1.52E-13  | 0.79 |
| 29848 | 60113  | 60579  | 1.18E-26  | 0.77 |
| 29848 | 104089 | 104773 | 2.15E-22  | 0.71 |
| 29848 | 110797 | 111113 | 6.70E-19  | 0.81 |
| 29848 | 151061 | 152666 | 3.47E-83  | 0.72 |
| 29848 | 163161 | 163524 | 1.87E-30  | 0.74 |
| 29848 | 163792 | 164938 | 3.85E-75  | 0.68 |
| 29848 | 250560 | 251159 | 2.34E-28  | 0.75 |
| 29848 | 277693 | 278199 | 1.19E-31  | 0.63 |
| 29848 | 281346 | 282556 | 4.82E-59  | 0.79 |
| 29848 | 282788 | 283248 | 5.07E-46  | 0.93 |
| 29848 | 284295 | 285289 | 1.40E-50  | 0.9  |
| 29848 | 302312 | 302733 | 1.91E-09  | 0.78 |
| 29848 | 317343 | 317561 | 2.64E-25  | 0.81 |
| 29848 | 319233 | 319599 | 1.83E-26  | 0.79 |
| 29848 | 320089 | 320523 | 4.37E-26  | 0.9  |
| 29848 | 339072 | 339928 | 3.05E-32  | 0.8  |
| 29848 | 341416 | 342861 | 1.43E-43  | 0.7  |
| 29848 | 360099 | 361921 | 4.81E-115 | 0.69 |
| 29848 | 374076 | 374987 | 5.67E-37  | 0.69 |
| 29848 | 413462 | 413906 | 8.84E-16  | 0.76 |
| 29848 | 416617 | 418218 | 2.94E-88  | 0.87 |
| 29848 | 419430 | 419883 | 8.61E-36  | 0.92 |
| 29848 | 425338 | 425759 | 1.23E-16  | 0.82 |
| 29848 | 426659 | 427062 | 1.91E-11  | 0.86 |
| 29848 | 428949 | 429213 | 3.45E-14  | 0.79 |
| 29848 | 448494 | 450498 | 7.17E-87  | 0.77 |
| 29848 | 455839 | 456728 | 1.52E-43  | 0.83 |
| 29848 | 460799 | 461935 | 1.27E-83  | 0.64 |
| 29848 | 462230 | 462494 | 2.42E-31  | 0.85 |
| 29848 | 471312 | 471720 | 6.22E-29  | 0.94 |
| 29848 | 480889 | 482093 | 5.12E-117 | 0.88 |
| 29848 | 490245 | 490546 | 1.09E-32  | 0.88 |
| 29848 | 498753 | 499861 | 5.14E-69  | 0.87 |
| 29848 | 512733 | 513918 | 1.24E-83  | 0.89 |
| 29848 | 514281 | 514727 | 3.10E-12  | 0.82 |
| 29848 | 515404 | 516101 | 2.37E-34  | 0.88 |
| 29848 | 582204 | 582725 | 2.74E-33  | 0.88 |
| 29848 | 582995 | 584431 | 5.19E-80  | 0.87 |
| 29848 | 586715 | 587784 | 1.89E-100 | 0.88 |
| 29848 | 587997 | 588370 | 1.01E-51  | 0.96 |
| 29848 | 588574 | 588896 | 3.89E-39  | 0.79 |
| 29848 | 592021 | 593172 | 1.89E-26  | 0.7  |
| 29848 | 594100 | 594656 | 8.02E-13  | 0.74 |
| 29848 | 597028 | 599135 | 5.36E-111 | 0.69 |
| 29848 | 603587 | 604025 | 4.42E-20  | 0.67 |
| 29848 | 626285 | 626686 | 5.18E-35  | 0.87 |

|       |         |         |           |      |
|-------|---------|---------|-----------|------|
| 29848 | 626965  | 627209  | 1.43E-10  | 0.79 |
| 29848 | 648033  | 649215  | 1.03E-50  | 0.83 |
| 29848 | 651771  | 652091  | 3.44E-23  | 0.78 |
| 29848 | 655446  | 655718  | 9.80E-90  | 0.87 |
| 29848 | 658246  | 658507  | 1.65E-35  | 0.9  |
| 29848 | 664021  | 665246  | 2.09E-100 | 0.92 |
| 29848 | 666047  | 667514  | 8.86E-92  | 0.84 |
| 29848 | 668224  | 669067  | 3.14E-32  | 0.84 |
| 29848 | 669311  | 669814  | 1.03E-59  | 0.91 |
| 29848 | 670132  | 671189  | 2.35E-68  | 0.82 |
| 29848 | 671476  | 671976  | 2.36E-43  | 0.64 |
| 29848 | 682758  | 683653  | 9.46E-79  | 0.88 |
| 29848 | 683925  | 684516  | 3.56E-68  | 0.86 |
| 29848 | 711348  | 711554  | 2.89E-35  | 0.66 |
| 29848 | 766728  | 767016  | 1.04E-17  | 0.79 |
| 29848 | 817503  | 818041  | 2.98E-32  | 0.6  |
| 29848 | 818378  | 819741  | 5.03E-111 | 0.79 |
| 29848 | 830194  | 830411  | 2.25E-39  | 0.83 |
| 29848 | 836383  | 837233  | 3.77E-45  | 0.76 |
| 29848 | 852602  | 852998  | 1.59E-55  | 0.9  |
| 29848 | 865215  | 865780  | 2.70E-29  | 0.89 |
| 29848 | 866195  | 867034  | 1.89E-26  | 0.73 |
| 29848 | 873139  | 873591  | 3.92E-16  | 0.84 |
| 29848 | 884009  | 885244  | 1.12E-73  | 0.92 |
| 29848 | 888086  | 888817  | 1.46E-52  | 0.79 |
| 29848 | 919916  | 920353  | 2.82E-21  | 0.79 |
| 29848 | 921114  | 922014  | 6.70E-72  | 0.87 |
| 29848 | 929821  | 930158  | 5.99E-35  | 0.73 |
| 29848 | 932595  | 933120  | 2.65E-29  | 0.81 |
| 29848 | 932731  | 933377  | 1.22E-43  | 0.81 |
| 29848 | 964099  | 965694  | 6.33E-36  | 0.61 |
| 29848 | 974949  | 975992  | 2.10E-51  | 0.63 |
| 29848 | 976596  | 976935  | 7.28E-29  | 0.94 |
| 29848 | 1022308 | 1023241 | 2.74E-47  | 0.81 |
| 29848 | 1022420 | 1023554 | 4.39E-53  | 0.83 |
| 29848 | 1032585 | 1032984 | 8.75E-14  | 0.82 |
| 29848 | 1038313 | 1038561 | 1.44E-19  | 0.71 |
| 29848 | 1039562 | 1039768 | 1.32E-17  | 0.83 |
| 29848 | 1043257 | 1044023 | 5.49E-25  | 0.73 |
| 29848 | 1050136 | 1050589 | 8.99E-17  | 0.8  |
| 29848 | 1061342 | 1061671 | 1.02E-10  | 0.76 |
| 29848 | 1064548 | 1064857 | 2.69E-24  | 0.79 |
| 29848 | 1112676 | 1113908 | 1.28E-73  | 0.7  |
| 29848 | 1116267 | 1116545 | 5.41E-40  | 0.86 |
| 29848 | 1118020 | 1118641 | 3.48E-59  | 0.94 |
| 29848 | 1119936 | 1120789 | 6.44E-35  | 0.77 |
| 29848 | 1121010 | 1121879 | 5.38E-50  | 0.63 |
| 29848 | 1129711 | 1130167 | 6.56E-39  | 0.75 |
| 29848 | 1130374 | 1130719 | 2.38E-20  | 0.8  |
| 29848 | 1143471 | 1144727 | 1.05E-83  | 0.85 |
| 29848 | 1166860 | 1168134 | 2.13E-51  | 0.81 |
| 29848 | 1182023 | 1182897 | 1.96E-105 | 0.86 |
| 29848 | 1184912 | 1185139 | 2.78E-15  | 0.8  |

|       |         |         |           |      |
|-------|---------|---------|-----------|------|
| 29848 | 1186126 | 1186807 | 3.56E-44  | 0.86 |
| 29848 | 1188770 | 1189122 | 6.58E-14  | 0.82 |
| 29848 | 1193748 | 1194566 | 4.85E-62  | 0.9  |
| 29848 | 1221824 | 1223195 | 5.09E-37  | 0.67 |
| 29848 | 1223476 | 1223777 | 1.52E-19  | 0.81 |
| 29848 | 1247719 | 1248300 | 1.16E-24  | 0.75 |
| 29848 | 1249267 | 1250526 | 9.37E-33  | 0.7  |
| 29848 | 1268031 | 1269008 | 7.10E-36  | 0.84 |
| 29848 | 1296574 | 1297082 | 2.83E-61  | 0.91 |
| 29848 | 1304618 | 1305124 | 4.72E-27  | 0.83 |
| 29848 | 1322975 | 1323822 | 1.31E-38  | 0.83 |
| 29848 | 1324746 | 1325428 | 9.46E-65  | 0.88 |
| 29848 | 1327665 | 1329041 | 2.85E-98  | 0.88 |
| 29848 | 1330314 | 1330947 | 1.47E-39  | 0.81 |
| 29848 | 1339238 | 1340963 | 9.85E-80  | 0.76 |
| 29848 | 1341625 | 1342133 | 6.52E-46  | 0.78 |
| 29848 | 1362946 | 1363507 | 6.02E-16  | 0.78 |
| 29848 | 1369683 | 1370261 | 2.27E-47  | 0.92 |
| 29848 | 1371082 | 1371569 | 2.06E-30  | 0.94 |
| 29848 | 1372053 | 1372417 | 1.08E-32  | 0.76 |
| 29848 | 1383652 | 1383874 | 3.46E-29  | 0.92 |
| 29848 | 1390562 | 1392306 | 5.84E-251 | 0.85 |
| 29848 | 1418392 | 1419124 | 2.34E-39  | 0.81 |
| 29848 | 1419357 | 1419836 | 7.22E-26  | 0.84 |
| 29848 | 1425867 | 1427917 | 2.53E-71  | 0.66 |
| 29848 | 1428515 | 1429028 | 6.00E-42  | 0.86 |
| 29848 | 1429682 | 1430547 | 1.65E-30  | 0.76 |
| 29848 | 1461482 | 1461857 | 7.68E-23  | 0.68 |
| 29848 | 1464626 | 1464945 | 8.94E-28  | 0.79 |
| 29848 | 1509669 | 1510050 | 5.86E-18  | 0.61 |
| 29848 | 1515652 | 1516106 | 8.82E-43  | 0.77 |
| 29848 | 1562441 | 1563482 | 9.37E-46  | 0.63 |
| 29848 | 1563762 | 1564183 | 2.22E-40  | 0.83 |
| 29848 | 1568732 | 1569465 | 8.81E-54  | 0.87 |
| 29848 | 1569733 | 1570474 | 1.46E-41  | 0.87 |
| 29848 | 1590748 | 1591016 | 1.01E-65  | 0.96 |
| 29848 | 1591247 | 1591666 | 3.18E-23  | 0.78 |
| 29848 | 1601848 | 1602730 | 5.76E-50  | 0.7  |
| 29848 | 1606010 | 1606669 | 2.58E-27  | 0.72 |
| 29848 | 1606914 | 1607252 | 1.00E-11  | 0.8  |
| 29848 | 1608995 | 1609793 | 1.64E-81  | 0.85 |
| 29849 | 41532   | 42040   | 2.35E-09  | 0.86 |
| 29849 | 42040   | 42267   | 2.11E-04  | 0.92 |
| 29849 | 65866   | 66308   | 1.96E-22  | 0.96 |
| 29849 | 68593   | 68915   | 6.22E-05  | 0.8  |
| 29849 | 80718   | 81344   | 5.42E-63  | 0.89 |
| 29849 | 122308  | 122883  | 6.42E-10  | 0.81 |
| 29849 | 145079  | 145782  | 8.70E-14  | 0.81 |
| 29849 | 145303  | 145846  | 3.09E-12  | 0.78 |
| 29849 | 146473  | 146735  | 1.03E-08  | 0.85 |
| 29849 | 158861  | 159246  | 5.82E-05  | 1    |
| 29849 | 250025  | 250243  | 3.55E-06  | 0.98 |
| 29849 | 260112  | 260539  | 1.81E-11  | 0.91 |

|       |         |         |           |      |
|-------|---------|---------|-----------|------|
| 29849 | 272598  | 272866  | 9.77E-28  | 0.93 |
| 29849 | 275743  | 276817  | 1.53E-111 | 0.97 |
| 29849 | 305352  | 306079  | 1.03E-29  | 0.97 |
| 29849 | 309250  | 309771  | 2.83E-05  | 0.82 |
| 29849 | 327456  | 327865  | 6.84E-18  | 0.83 |
| 29849 | 350736  | 351322  | 2.54E-25  | 0.93 |
| 29849 | 352423  | 352884  | 5.39E-31  | 0.79 |
| 29849 | 353862  | 354279  | 7.43E-06  | 0.67 |
| 29849 | 355755  | 357269  | 5.52E-46  | 0.73 |
| 29849 | 359691  | 360186  | 4.97E-09  | 0.78 |
| 29849 | 449329  | 449920  | 2.60E-05  | 0.94 |
| 29849 | 449748  | 450242  | 1.76E-07  | 0.9  |
| 29849 | 452173  | 452597  | 1.96E-04  | 0.95 |
| 29849 | 465084  | 465289  | 1.05E-08  | 0.85 |
| 29849 | 470987  | 471235  | 8.65E-11  | 0.88 |
| 29849 | 473206  | 473822  | 7.53E-17  | 0.95 |
| 29849 | 645252  | 645894  | 4.91E-08  | 1    |
| 29849 | 648381  | 648650  | 1.27E-04  | 0.97 |
| 29849 | 657346  | 657927  | 4.73E-06  | 0.91 |
| 29849 | 691574  | 691859  | 4.16E-41  | 0.91 |
| 29849 | 700430  | 701079  | 3.71E-25  | 0.76 |
| 29849 | 821768  | 821982  | 1.26E-10  | 0.97 |
| 29849 | 831034  | 831272  | 1.30E-05  | 0.92 |
| 29849 | 846262  | 846836  | 1.03E-13  | 1    |
| 29849 | 867184  | 867741  | 1.54E-04  | 0.89 |
| 29849 | 902045  | 902723  | 7.18E-08  | 0.9  |
| 29849 | 925399  | 925812  | 4.98E-11  | 0.98 |
| 29849 | 1015607 | 1016153 | 7.97E-04  | 0.78 |
| 29850 | 26990   | 27891   | 1.90E-52  | 0.83 |
| 29850 | 28607   | 28883   | 1.81E-32  | 0.82 |
| 29850 | 29155   | 30720   | 6.48E-82  | 0.87 |
| 29850 | 43222   | 43710   | 2.69E-19  | 0.8  |
| 29850 | 78095   | 78320   | 4.64E-24  | 0.88 |
| 29850 | 78887   | 79194   | 3.23E-25  | 0.83 |
| 29850 | 103061  | 103418  | 2.21E-47  | 0.84 |
| 29851 | 180     | 476     | 9.81E-22  | 0.9  |
| 29851 | 38052   | 38701   | 2.61E-71  | 0.91 |
| 29851 | 57415   | 57746   | 2.12E-20  | 0.74 |
| 29851 | 89613   | 93011   | 7.75E-111 | 0.84 |
| 29851 | 93753   | 94134   | 2.69E-51  | 0.92 |
| 29851 | 113105  | 113792  | 4.16E-43  | 0.87 |
| 29851 | 116837  | 119543  | 3.07E-292 | 0.75 |
| 29851 | 131627  | 131828  | 1.79E-17  | 0.66 |
| 29851 | 140146  | 141200  | 2.19E-63  | 0.74 |
| 29851 | 145986  | 146568  | 2.00E-33  | 0.84 |
| 29851 | 150056  | 151087  | 5.71E-49  | 0.77 |
| 29851 | 158993  | 159659  | 4.23E-30  | 0.79 |
| 29851 | 167145  | 168439  | 1.69E-34  | 0.82 |
| 29851 | 181692  | 182016  | 6.67E-45  | 0.8  |
| 29851 | 201886  | 202763  | 5.41E-42  | 0.64 |
| 29851 | 204076  | 204294  | 7.46E-14  | 0.8  |
| 29851 | 205413  | 205653  | 1.60E-25  | 0.91 |
| 29851 | 235491  | 236086  | 2.80E-18  | 0.72 |

|       |        |        |           |      |
|-------|--------|--------|-----------|------|
| 29851 | 239423 | 239725 | 3.52E-38  | 0.89 |
| 29851 | 246698 | 247302 | 3.37E-19  | 0.81 |
| 29851 | 254350 | 255837 | 1.78E-67  | 0.84 |
| 29851 | 256340 | 256945 | 9.02E-12  | 0.8  |
| 29851 | 256561 | 256978 | 1.29E-10  | 0.8  |
| 29851 | 270466 | 270981 | 1.63E-32  | 0.94 |
| 29851 | 275674 | 276158 | 4.04E-28  | 0.83 |
| 29851 | 307538 | 308042 | 1.53E-49  | 0.87 |
| 29851 | 308820 | 309133 | 6.93E-43  | 0.91 |
| 29851 | 309376 | 310092 | 1.81E-46  | 0.89 |
| 29851 | 311009 | 312225 | 4.72E-82  | 0.9  |
| 29851 | 324485 | 324937 | 2.92E-13  | 0.8  |
| 29851 | 338266 | 338998 | 4.26E-36  | 0.75 |
| 29851 | 362600 | 362800 | 2.37E-21  | 0.8  |
| 29851 | 363543 | 364275 | 6.09E-46  | 0.85 |
| 29851 | 416242 | 416954 | 3.48E-46  | 0.61 |
| 29851 | 418682 | 419113 | 2.07E-14  | 0.79 |
| 29851 | 450193 | 451499 | 3.01E-107 | 0.85 |
| 29851 | 455453 | 455978 | 3.35E-30  | 0.68 |
| 29851 | 471222 | 471934 | 3.12E-46  | 0.84 |
| 29851 | 473267 | 473981 | 9.09E-23  | 0.76 |
| 29851 | 477324 | 477617 | 7.33E-22  | 0.97 |
| 29851 | 480909 | 481478 | 9.17E-42  | 0.93 |
| 29851 | 481716 | 483409 | 1.51E-107 | 0.95 |
| 29851 | 483725 | 486531 | 5.10E-212 | 0.86 |
| 29851 | 507625 | 508220 | 1.19E-16  | 0.91 |
| 29851 | 529905 | 530382 | 6.03E-17  | 0.62 |
| 29851 | 530817 | 531648 | 1.43E-61  | 0.87 |
| 29851 | 535150 | 536260 | 1.44E-36  | 0.69 |
| 29851 | 538152 | 539549 | 8.26E-68  | 0.77 |
| 29851 | 565080 | 567077 | 3.29E-91  | 0.89 |
| 29851 | 570619 | 571208 | 1.79E-27  | 0.65 |
| 29851 | 598755 | 599000 | 1.95E-14  | 0.71 |
| 29851 | 609947 | 610336 | 1.37E-20  | 0.84 |
| 29851 | 619551 | 619765 | 3.76E-16  | 0.91 |
| 29851 | 620481 | 621126 | 2.25E-53  | 0.87 |
| 29851 | 676423 | 676718 | 5.60E-24  | 0.91 |
| 29851 | 763046 | 764666 | 6.23E-105 | 0.78 |
| 29851 | 766343 | 767259 | 2.08E-75  | 0.91 |
| 29851 | 768168 | 768751 | 7.76E-29  | 0.89 |
| 29851 | 769259 | 769918 | 9.06E-45  | 0.83 |
| 29851 | 774004 | 775215 | 2.06E-100 | 0.91 |
| 29851 | 775453 | 776759 | 1.30E-131 | 0.91 |
| 29851 | 777518 | 778297 | 1.78E-28  | 0.8  |
| 29851 | 778537 | 778855 | 5.43E-20  | 0.77 |
| 29851 | 780879 | 781261 | 1.39E-16  | 0.72 |
| 29851 | 781725 | 781964 | 1.16E-58  | 0.85 |
| 29851 | 802676 | 803042 | 3.66E-34  | 0.65 |
| 29851 | 804264 | 805273 | 6.71E-38  | 0.65 |
| 29851 | 823717 | 825212 | 5.29E-104 | 0.91 |
| 29851 | 846373 | 846845 | 3.99E-13  | 0.77 |
| 29851 | 847821 | 848387 | 1.32E-22  | 0.87 |
| 29851 | 851773 | 852284 | 2.45E-38  | 0.87 |

|       |         |         |           |      |
|-------|---------|---------|-----------|------|
| 29851 | 853435  | 854396  | 1.30E-67  | 0.61 |
| 29851 | 888827  | 889241  | 1.02E-32  | 0.76 |
| 29851 | 895822  | 896487  | 1.77E-95  | 0.97 |
| 29851 | 985634  | 989674  | 1.48E-299 | 0.86 |
| 29851 | 990137  | 990776  | 1.64E-44  | 0.91 |
| 29851 | 1009151 | 1009403 | 1.19E-24  | 0.81 |
| 29852 | 9124    | 9383    | 1.77E-07  | 0.79 |
| 29852 | 42046   | 42374   | 6.11E-07  | 0.73 |
| 29852 | 71865   | 72200   | 2.80E-12  | 0.92 |
| 29852 | 76119   | 76598   | 3.21E-05  | 0.88 |
| 29852 | 97015   | 97605   | 6.31E-07  | 0.93 |
| 29852 | 100443  | 100722  | 7.08E-17  | 0.98 |
| 29852 | 160607  | 161188  | 5.98E-14  | 1    |
| 29852 | 216460  | 217582  | 5.73E-51  | 0.84 |
| 29852 | 226470  | 226872  | 1.63E-03  | 0.87 |
| 29852 | 279404  | 280078  | 1.14E-07  | 0.96 |
| 29852 | 317294  | 318148  | 2.89E-73  | 0.88 |
| 29852 | 319549  | 319877  | 9.22E-41  | 0.93 |
| 29852 | 342078  | 342614  | 4.05E-04  | 0.71 |
| 29852 | 356342  | 356549  | 9.93E-13  | 0.98 |
| 29852 | 362222  | 362912  | 3.01E-21  | 0.82 |
| 29852 | 399628  | 399895  | 1.56E-05  | 0.88 |
| 29852 | 443042  | 443279  | 1.88E-28  | 0.95 |
| 29852 | 498046  | 498975  | 1.91E-15  | 0.91 |
| 29852 | 511832  | 512104  | 8.95E-11  | 0.81 |
| 29852 | 556033  | 556503  | 9.24E-06  | 0.9  |
| 29852 | 589239  | 589924  | 2.87E-16  | 0.81 |
| 29852 | 618331  | 618585  | 2.19E-10  | 0.9  |
| 29852 | 650888  | 651828  | 5.22E-80  | 0.96 |
| 29852 | 654808  | 655263  | 5.90E-58  | 0.87 |
| 29852 | 662041  | 662324  | 8.58E-15  | 0.87 |
| 29852 | 664628  | 664844  | 5.23E-54  | 0.92 |
| 29852 | 666343  | 666642  | 4.27E-31  | 0.91 |
| 29852 | 666947  | 667240  | 5.21E-58  | 0.96 |
| 29852 | 667616  | 667984  | 4.84E-40  | 0.88 |
| 29852 | 671324  | 671763  | 2.74E-64  | 0.95 |
| 29852 | 677512  | 678054  | 1.51E-09  | 0.82 |
| 29852 | 687419  | 687791  | 1.64E-11  | 0.88 |
| 29852 | 798107  | 798499  | 9.97E-12  | 0.96 |
| 29852 | 844306  | 844708  | 1.33E-04  | 0.89 |
| 29852 | 848805  | 849129  | 6.57E-07  | 0.8  |
| 29852 | 849466  | 849996  | 4.40E-08  | 0.89 |
| 29852 | 862062  | 863657  | 1.62E-21  | 0.81 |
| 29852 | 862531  | 863751  | 5.49E-17  | 0.81 |
| 29852 | 864920  | 865215  | 1.27E-19  | 0.93 |
| 29852 | 872454  | 872920  | 4.21E-19  | 0.92 |
| 29852 | 890672  | 891066  | 4.55E-54  | 0.96 |
| 29852 | 891401  | 891977  | 4.66E-66  | 0.93 |
| 29852 | 892181  | 892518  | 5.79E-30  | 0.94 |
| 29852 | 900935  | 901154  | 1.29E-15  | 0.77 |
| 29852 | 903936  | 904444  | 4.13E-25  | 0.83 |
| 29852 | 906822  | 907448  | 8.62E-21  | 0.85 |
| 29852 | 909761  | 911259  | 6.83E-124 | 0.82 |

|       |         |         |           |      |
|-------|---------|---------|-----------|------|
| 29852 | 1030580 | 1030846 | 1.44E-30  | 0.97 |
| 29852 | 1031389 | 1031826 | 1.28E-22  | 0.95 |
| 29852 | 1057936 | 1058553 | 1.19E-22  | 0.75 |
| 29852 | 1064442 | 1064881 | 1.51E-33  | 0.84 |
| 29852 | 1073535 | 1074156 | 1.31E-38  | 0.8  |
| 29852 | 1073638 | 1074312 | 4.21E-41  | 0.8  |
| 29852 | 1122769 | 1123104 | 1.99E-04  | 0.89 |
| 29852 | 1157998 | 1158413 | 7.45E-21  | 0.94 |
| 29852 | 1171531 | 1171814 | 7.06E-24  | 0.71 |
| 29852 | 1180034 | 1180765 | 4.77E-24  | 0.82 |
| 29852 | 1181501 | 1182226 | 6.07E-45  | 0.91 |
| 29852 | 1185171 | 1185467 | 6.61E-30  | 0.96 |
| 29852 | 1185876 | 1186377 | 1.09E-60  | 0.96 |
| 29852 | 1225748 | 1226340 | 1.42E-11  | 0.97 |
| 29852 | 1266831 | 1267405 | 5.31E-19  | 0.61 |
| 29852 | 1267664 | 1269131 | 4.20E-115 | 0.87 |
| 29852 | 1273779 | 1274390 | 1.63E-41  | 0.9  |
| 29852 | 1275975 | 1276695 | 2.80E-37  | 0.91 |
| 29852 | 1277199 | 1278857 | 4.87E-56  | 0.82 |
| 29852 | 1279685 | 1280322 | 4.79E-46  | 0.89 |
| 29852 | 1341704 | 1341972 | 1.22E-02  | 0.71 |
| 29852 | 1402580 | 1402801 | 9.57E-11  | 0.75 |
| 29852 | 1406490 | 1406872 | 5.43E-18  | 0.9  |
| 29852 | 1408696 | 1409128 | 7.89E-25  | 0.92 |
| 29852 | 1455731 | 1456235 | 4.99E-46  | 0.93 |
| 29852 | 1626457 | 1627605 | 8.14E-108 | 0.89 |
| 29852 | 1746564 | 1748211 | 1.16E-88  | 0.86 |
| 29852 | 1767460 | 1768204 | 1.53E-09  | 0.82 |
| 29852 | 1768403 | 1768630 | 5.42E-04  | 0.94 |
| 29852 | 1790629 | 1793072 | 2.39E-112 | 0.72 |
| 29853 | 34214   | 34525   | 1.15E-05  | 0.8  |
| 29853 | 55196   | 55436   | 1.37E-05  | 0.86 |
| 29853 | 95928   | 96273   | 2.35E-10  | 0.98 |
| 29853 | 111198  | 111610  | 3.01E-12  | 0.96 |
| 29853 | 122939  | 123193  | 1.35E-03  | 1    |
| 29853 | 138058  | 138508  | 1.45E-05  | 0.83 |
| 29853 | 139951  | 140633  | 8.60E-07  | 0.9  |
| 29853 | 155018  | 155327  | 1.29E-06  | 0.92 |
| 29853 | 214391  | 214773  | 1.14E-05  | 0.96 |
| 29853 | 218281  | 218716  | 7.93E-10  | 0.97 |
| 29853 | 231457  | 231782  | 1.68E-05  | 0.86 |
| 29853 | 248854  | 249127  | 9.32E-05  | 0.86 |
| 29853 | 257552  | 257827  | 4.58E-07  | 0.72 |
| 29853 | 262911  | 263319  | 1.06E-05  | 0.84 |
| 29853 | 274632  | 274897  | 4.52E-05  | 0.63 |
| 29853 | 305880  | 306139  | 2.14E-04  | 0.95 |
| 29853 | 329552  | 329973  | 8.15E-13  | 0.92 |
| 29853 | 354626  | 355164  | 3.23E-09  | 0.88 |
| 29853 | 367309  | 367743  | 2.44E-07  | 0.78 |
| 29853 | 392033  | 392298  | 8.79E-11  | 0.87 |
| 29853 | 402265  | 403046  | 4.62E-07  | 0.83 |
| 29853 | 412780  | 413056  | 1.21E-06  | 0.81 |
| 29853 | 451770  | 452092  | 7.08E-14  | 0.89 |



|       |        |        |           |      |
|-------|--------|--------|-----------|------|
| 29853 | 530553 | 531000 | 4.87E-20  | 0.88 |
| 29853 | 551312 | 551521 | 2.55E-07  | 0.86 |
| 29853 | 559331 | 559682 | 3.71E-09  | 0.86 |
| 29853 | 586274 | 586540 | 2.20E-11  | 0.87 |
| 29853 | 609792 | 610406 | 2.73E-38  | 0.79 |
| 29853 | 610568 | 610770 | 1.23E-05  | 0.85 |
| 29853 | 616529 | 616742 | 2.81E-11  | 0.87 |
| 29853 | 725316 | 725875 | 1.36E-19  | 0.9  |
| 29853 | 732473 | 732924 | 4.81E-07  | 0.97 |
| 29853 | 752247 | 752796 | 1.20E-10  | 0.63 |
| 29853 | 753697 | 754276 | 1.99E-51  | 0.96 |
| 29853 | 800930 | 801211 | 3.10E-09  | 0.9  |
| 29853 | 814298 | 814602 | 3.62E-47  | 0.97 |
| 29853 | 935781 | 935997 | 9.45E-12  | 0.88 |
| 29853 | 952801 | 953359 | 1.02E-18  | 0.91 |
| 29853 | 954104 | 954612 | 1.61E-22  | 0.94 |
| 29853 | 954983 | 955503 | 5.95E-15  | 0.83 |
| 29854 | 4614   | 5459   | 8.75E-46  | 0.86 |
| 29854 | 54923  | 55509  | 3.60E-61  | 0.97 |
| 29854 | 56345  | 56700  | 1.28E-19  | 0.9  |
| 29854 | 61581  | 61913  | 1.82E-42  | 0.89 |
| 29854 | 63099  | 64603  | 9.10E-69  | 0.94 |
| 29854 | 97765  | 98128  | 4.60E-22  | 0.69 |
| 29854 | 98335  | 98640  | 8.28E-12  | 0.75 |
| 29854 | 99660  | 99871  | 9.56E-16  | 0.73 |
| 29854 | 104657 | 105218 | 5.26E-27  | 0.71 |
| 29854 | 109859 | 110827 | 2.26E-55  | 0.84 |
| 29854 | 111890 | 112244 | 2.57E-27  | 0.96 |
| 29854 | 175830 | 176630 | 2.05E-79  | 0.95 |
| 29854 | 176839 | 177395 | 6.74E-29  | 0.91 |
| 29854 | 178182 | 179284 | 6.89E-114 | 0.95 |
| 29854 | 179543 | 180022 | 1.71E-38  | 0.95 |
| 29854 | 189240 | 189800 | 5.98E-15  | 0.76 |
| 29854 | 207340 | 207928 | 1.03E-49  | 0.9  |
| 29854 | 241275 | 241566 | 4.94E-06  | 1    |
| 29854 | 245307 | 245538 | 1.53E-03  | 0.96 |
| 29854 | 260353 | 260573 | 2.20E-06  | 0.76 |
| 29854 | 282359 | 282619 | 1.62E-08  | 0.74 |
| 29854 | 306600 | 307161 | 4.75E-18  | 0.81 |
| 29854 | 310804 | 311153 | 1.11E-42  | 0.89 |
| 29854 | 346329 | 347529 | 3.05E-15  | 0.98 |
| 29854 | 364595 | 365417 | 5.70E-49  | 0.88 |
| 29854 | 365716 | 366834 | 4.31E-83  | 0.95 |
| 29854 | 369109 | 369435 | 1.78E-41  | 0.93 |
| 29854 | 373382 | 374034 | 3.56E-33  | 0.95 |
| 29854 | 438708 | 438936 | 2.19E-18  | 0.92 |
| 29854 | 453435 | 453713 | 8.62E-14  | 0.89 |
| 29854 | 460938 | 461331 | 1.55E-27  | 0.95 |
| 29854 | 503007 | 505504 | 3.94E-85  | 0.65 |
| 29854 | 551671 | 552101 | 1.33E-14  | 0.78 |
| 29854 | 556095 | 556401 | 5.45E-37  | 0.95 |
| 29854 | 624006 | 624341 | 2.04E-74  | 0.94 |
| 29854 | 632027 | 632546 | 2.62E-25  | 0.86 |

|       |         |         |          |      |
|-------|---------|---------|----------|------|
| 29854 | 634523  | 635056  | 1.73E-82 | 0.92 |
| 29854 | 635918  | 636215  | 3.29E-16 | 0.95 |
| 29854 | 639380  | 640251  | 2.26E-83 | 0.96 |
| 29854 | 643486  | 644365  | 4.22E-77 | 0.96 |
| 29854 | 653237  | 653782  | 3.07E-74 | 0.95 |
| 29854 | 659536  | 659866  | 2.32E-13 | 0.66 |
| 29854 | 665249  | 665843  | 6.79E-51 | 0.89 |
| 29854 | 756793  | 757053  | 5.01E-06 | 0.94 |
| 29854 | 757853  | 758081  | 5.12E-09 | 0.96 |
| 29854 | 790183  | 790424  | 9.67E-09 | 0.83 |
| 29854 | 847142  | 847485  | 2.67E-34 | 0.96 |
| 29854 | 849380  | 850705  | 6.49E-51 | 0.78 |
| 29854 | 850911  | 851286  | 1.79E-22 | 0.72 |
| 29854 | 880419  | 880948  | 3.74E-20 | 0.8  |
| 29854 | 922616  | 923098  | 3.87E-13 | 0.7  |
| 29854 | 927835  | 928486  | 1.98E-25 | 0.67 |
| 29854 | 947270  | 947629  | 1.98E-09 | 0.97 |
| 29854 | 997399  | 997631  | 3.30E-18 | 0.92 |
| 29854 | 999376  | 1000306 | 6.74E-30 | 0.75 |
| 29854 | 1000834 | 1001354 | 1.48E-49 | 0.94 |
| 29854 | 1086824 | 1087144 | 2.00E-08 | 0.85 |
| 29854 | 1099830 | 1100604 | 2.55E-63 | 0.94 |
| 29854 | 1109141 | 1109530 | 4.86E-34 | 0.91 |
| 29854 | 1109932 | 1110180 | 2.66E-34 | 0.96 |
| 29854 | 1117516 | 1118019 | 4.82E-17 | 0.82 |
| 29854 | 1150748 | 1151660 | 2.63E-38 | 0.84 |
| 29854 | 1153475 | 1154665 | 5.77E-30 | 0.75 |
| 29854 | 1155257 | 1155718 | 3.71E-15 | 0.81 |
| 29854 | 1228155 | 1228472 | 1.80E-05 | 0.97 |
| 29854 | 1268897 | 1269241 | 1.53E-18 | 0.86 |
| 29854 | 1298055 | 1298409 | 1.96E-08 | 0.82 |
| 29854 | 1382648 | 1383868 | 1.29E-70 | 0.89 |
| 29855 | 7050    | 8199    | 1.45E-25 | 0.63 |
| 29855 | 9711    | 9999    | 5.53E-16 | 0.91 |
| 29855 | 10656   | 10945   | 6.82E-29 | 0.94 |
| 29855 | 11499   | 12052   | 1.91E-39 | 0.92 |
| 29857 | 12915   | 13363   | 2.91E-08 | 0.82 |
| 29858 | 18891   | 19182   | 7.23E-09 | 0.95 |
| 29858 | 42078   | 42517   | 4.08E-05 | 0.83 |
| 29858 | 94315   | 94625   | 1.75E-04 | 0.82 |
| 29858 | 98192   | 98435   | 3.10E-14 | 0.81 |
| 29858 | 113377  | 113727  | 9.63E-06 | 0.87 |
| 29858 | 117396  | 117963  | 1.87E-16 | 0.98 |
| 29858 | 121639  | 121840  | 6.87E-19 | 0.81 |
| 29859 | 13474   | 13847   | 3.88E-25 | 0.68 |
| 29859 | 14319   | 14762   | 1.88E-26 | 0.75 |
| 29859 | 15057   | 15308   | 2.53E-25 | 0.84 |
| 29859 | 15677   | 16186   | 2.66E-58 | 0.69 |
| 29859 | 24220   | 24709   | 5.79E-24 | 0.86 |
| 29860 | 6255    | 6781    | 7.56E-04 | 0.95 |
| 29860 | 10960   | 11441   | 9.77E-10 | 0.98 |
| 29860 | 15995   | 16396   | 4.62E-15 | 0.9  |
| 29861 | 4807    | 5071    | 1.94E-15 | 0.86 |

|       |        |        |           |      |
|-------|--------|--------|-----------|------|
| 29861 | 29661  | 29971  | 6.98E-12  | 0.89 |
| 29861 | 32957  | 33166  | 1.08E-07  | 0.86 |
| 29861 | 38601  | 38865  | 3.08E-06  | 0.81 |
| 29861 | 60223  | 60502  | 3.16E-09  | 0.94 |
| 29861 | 116915 | 117380 | 4.52E-08  | 0.94 |
| 29861 | 143490 | 143898 | 1.21E-14  | 0.88 |
| 29861 | 162867 | 163118 | 2.44E-06  | 0.97 |
| 29862 | 35085  | 35450  | 9.79E-18  | 0.84 |
| 29862 | 92784  | 93302  | 1.06E-05  | 0.92 |
| 29862 | 152774 | 153277 | 1.08E-07  | 0.87 |
| 29862 | 181623 | 181850 | 2.43E-34  | 0.96 |
| 29862 | 226667 | 227089 | 3.93E-10  | 0.81 |
| 29862 | 303141 | 303878 | 1.44E-09  | 0.98 |
| 29862 | 352376 | 352639 | 6.39E-06  | 0.88 |
| 29862 | 495678 | 496005 | 2.40E-20  | 0.85 |
| 29862 | 596133 | 596450 | 5.26E-46  | 0.97 |
| 29862 | 596722 | 597127 | 6.25E-36  | 0.98 |
| 29862 | 597332 | 598347 | 2.88E-49  | 0.96 |
| 29862 | 599060 | 599700 | 2.68E-25  | 0.76 |
| 29862 | 600017 | 600893 | 1.77E-23  | 0.74 |
| 29862 | 638997 | 639266 | 3.29E-09  | 0.93 |
| 29863 | 107739 | 108172 | 3.68E-25  | 0.62 |
| 29863 | 131813 | 132190 | 7.27E-18  | 0.89 |
| 29863 | 198267 | 198595 | 1.42E-15  | 0.66 |
| 29863 | 312965 | 313251 | 9.65E-26  | 0.85 |
| 29863 | 432492 | 432787 | 2.81E-16  | 0.83 |
| 29864 | 2      | 290    | 4.36E-19  | 0.83 |
| 29864 | 46126  | 46510  | 3.04E-38  | 0.95 |
| 29864 | 48946  | 49281  | 2.66E-22  | 0.82 |
| 29864 | 62272  | 63341  | 8.88E-31  | 0.78 |
| 29864 | 64019  | 64340  | 1.33E-16  | 0.7  |
| 29864 | 67563  | 68066  | 6.14E-34  | 0.89 |
| 29864 | 73312  | 73855  | 8.56E-21  | 0.73 |
| 29864 | 79713  | 80024  | 5.02E-14  | 0.97 |
| 29864 | 114254 | 114536 | 3.56E-09  | 0.85 |
| 29864 | 116926 | 117418 | 1.87E-09  | 0.79 |
| 29864 | 120862 | 121360 | 5.12E-09  | 0.67 |
| 29864 | 212956 | 213775 | 2.24E-41  | 0.87 |
| 29864 | 233118 | 233348 | 1.75E-62  | 0.9  |
| 29864 | 241194 | 241691 | 5.16E-19  | 0.69 |
| 29864 | 267284 | 270005 | 5.99E-226 | 0.92 |
| 29864 | 270231 | 270589 | 5.90E-09  | 0.75 |
| 29864 | 275053 | 275479 | 2.75E-20  | 0.83 |
| 29864 | 300447 | 301708 | 7.07E-58  | 0.87 |
| 29864 | 302307 | 303245 | 4.75E-36  | 0.86 |
| 29864 | 305932 | 306267 | 2.31E-31  | 0.9  |
| 29864 | 306558 | 308726 | 1.61E-66  | 0.84 |
| 29864 | 318522 | 318901 | 9.48E-20  | 0.87 |
| 29864 | 346844 | 347061 | 3.45E-09  | 0.97 |
| 29864 | 396801 | 398259 | 1.24E-50  | 0.89 |
| 29864 | 400994 | 401362 | 9.49E-22  | 0.91 |
| 29864 | 415974 | 416956 | 2.03E-22  | 0.83 |
| 29864 | 486755 | 488910 | 3.09E-53  | 0.73 |

|       |         |         |           |      |
|-------|---------|---------|-----------|------|
| 29864 | 493219  | 493544  | 7.04E-18  | 0.76 |
| 29864 | 524508  | 524847  | 3.09E-27  | 0.85 |
| 29864 | 553354  | 553597  | 7.54E-35  | 0.87 |
| 29864 | 554278  | 555321  | 8.59E-100 | 0.93 |
| 29864 | 570141  | 571027  | 6.46E-29  | 0.81 |
| 29864 | 571245  | 571525  | 1.69E-12  | 0.9  |
| 29864 | 579765  | 580171  | 1.01E-11  | 0.74 |
| 29864 | 582324  | 582734  | 1.11E-41  | 0.64 |
| 29864 | 613192  | 613489  | 4.27E-34  | 0.71 |
| 29864 | 613836  | 614505  | 2.57E-24  | 0.84 |
| 29864 | 615872  | 616185  | 4.05E-22  | 0.89 |
| 29864 | 670586  | 671144  | 1.75E-22  | 0.86 |
| 29864 | 727474  | 728514  | 1.13E-27  | 0.67 |
| 29864 | 729366  | 730111  | 1.16E-18  | 0.8  |
| 29864 | 742985  | 743458  | 3.34E-14  | 0.86 |
| 29864 | 781439  | 782039  | 2.71E-53  | 0.9  |
| 29864 | 782240  | 782461  | 6.73E-06  | 0.73 |
| 29864 | 784378  | 784791  | 1.56E-08  | 0.63 |
| 29864 | 812500  | 813399  | 2.40E-48  | 0.94 |
| 29864 | 815665  | 816601  | 9.45E-54  | 0.97 |
| 29864 | 816870  | 817230  | 4.93E-32  | 0.96 |
| 29864 | 821561  | 821837  | 1.88E-12  | 0.95 |
| 29864 | 824987  | 825267  | 2.31E-15  | 0.88 |
| 29864 | 830486  | 830963  | 6.24E-27  | 0.84 |
| 29864 | 850061  | 850431  | 1.69E-21  | 0.91 |
| 29864 | 853046  | 853371  | 4.70E-19  | 0.85 |
| 29864 | 854248  | 854791  | 2.42E-34  | 0.91 |
| 29864 | 862579  | 862983  | 4.61E-06  | 0.8  |
| 29864 | 863312  | 863898  | 6.68E-28  | 0.75 |
| 29864 | 905300  | 905610  | 2.63E-17  | 0.7  |
| 29864 | 964744  | 965262  | 3.17E-21  | 0.74 |
| 29864 | 965627  | 966627  | 9.22E-50  | 0.89 |
| 29864 | 981356  | 981960  | 4.48E-62  | 0.84 |
| 29864 | 985383  | 985733  | 2.64E-21  | 0.82 |
| 29864 | 993104  | 994267  | 2.26E-42  | 0.73 |
| 29864 | 1031853 | 1032299 | 2.75E-10  | 0.76 |
| 29864 | 1049976 | 1050359 | 5.29E-44  | 0.78 |
| 29864 | 1052076 | 1052847 | 3.86E-37  | 0.83 |
| 29864 | 1056562 | 1056895 | 1.48E-35  | 0.98 |
| 29864 | 1124255 | 1124755 | 2.69E-29  | 0.9  |
| 29864 | 1128252 | 1128876 | 4.56E-14  | 0.97 |
| 29865 | 507     | 786     | 1.75E-04  | 0.91 |
| 29865 | 10594   | 10913   | 3.87E-09  | 0.86 |
| 29865 | 42281   | 42520   | 1.07E-04  | 0.84 |
| 29865 | 87376   | 87639   | 2.81E-07  | 0.61 |
| 29865 | 87547   | 87806   | 1.16E-04  | 0.7  |
| 29865 | 103907  | 104108  | 3.33E-14  | 0.93 |
| 29865 | 124624  | 125290  | 1.90E-04  | 0.7  |
| 29865 | 148640  | 148903  | 1.37E-11  | 0.84 |
| 29865 | 152829  | 153095  | 1.96E-27  | 0.9  |
| 29865 | 251502  | 252430  | 2.17E-43  | 0.92 |
| 29865 | 256725  | 258053  | 5.09E-82  | 0.97 |
| 29865 | 333377  | 333582  | 5.44E-07  | 0.92 |

|       |        |        |           |      |
|-------|--------|--------|-----------|------|
| 29865 | 381545 | 381813 | 7.56E-08  | 0.93 |
| 29865 | 389110 | 390011 | 2.62E-17  | 0.81 |
| 29865 | 415612 | 415937 | 1.86E-08  | 0.82 |
| 29865 | 424866 | 425113 | 6.36E-03  | 0.81 |
| 29865 | 425129 | 425619 | 3.57E-08  | 0.7  |
| 29865 | 430055 | 430366 | 2.70E-04  | 0.8  |
| 29865 | 451953 | 452456 | 4.77E-16  | 0.71 |
| 29865 | 470366 | 470593 | 4.26E-10  | 0.98 |
| 29865 | 480402 | 480631 | 1.66E-07  | 0.91 |
| 29865 | 536631 | 537040 | 5.20E-05  | 0.8  |
| 29865 | 578284 | 578928 | 4.82E-30  | 0.95 |
| 29865 | 585545 | 585826 | 2.31E-10  | 0.98 |
| 29865 | 599321 | 600283 | 1.17E-33  | 0.95 |
| 29865 | 610366 | 610983 | 6.93E-22  | 0.93 |
| 29865 | 713785 | 714229 | 1.47E-04  | 1    |
| 29865 | 729605 | 730036 | 2.97E-09  | 0.92 |
| 29865 | 740924 | 741203 | 5.42E-15  | 0.91 |
| 29865 | 748673 | 748974 | 8.08E-05  | 0.76 |
| 29865 | 777641 | 778079 | 9.60E-11  | 0.98 |
| 29865 | 795820 | 796797 | 1.08E-49  | 0.89 |
| 29865 | 808840 | 809215 | 4.39E-11  | 0.79 |
| 29865 | 822028 | 822228 | 6.79E-07  | 0.88 |
| 29865 | 827635 | 827958 | 5.83E-08  | 1    |
| 29865 | 832218 | 832535 | 9.58E-05  | 0.81 |
| 29865 | 832870 | 833537 | 6.82E-21  | 0.86 |
| 29865 | 834723 | 835235 | 3.68E-09  | 0.91 |
| 29866 | 9183   | 9427   | 5.80E-12  | 0.89 |
| 29866 | 12741  | 13274  | 2.24E-38  | 0.95 |
| 29866 | 14328  | 14982  | 9.10E-72  | 0.88 |
| 29866 | 79617  | 79834  | 2.54E-12  | 0.86 |
| 29866 | 173614 | 174051 | 2.54E-42  | 0.89 |
| 29866 | 191059 | 191357 | 6.40E-15  | 0.94 |
| 29866 | 218618 | 219379 | 4.84E-18  | 0.8  |
| 29866 | 222269 | 222801 | 4.50E-25  | 0.8  |
| 29866 | 252937 | 253518 | 2.61E-29  | 0.81 |
| 29866 | 253829 | 254310 | 1.12E-47  | 0.82 |
| 29866 | 322537 | 322957 | 2.35E-18  | 0.9  |
| 29866 | 326854 | 327234 | 5.77E-12  | 0.78 |
| 29866 | 367100 | 367542 | 1.64E-14  | 0.93 |
| 29866 | 374621 | 374838 | 1.40E-10  | 0.96 |
| 29866 | 405791 | 406240 | 1.86E-133 | 0.97 |
| 29866 | 408264 | 408679 | 6.96E-23  | 0.95 |
| 29867 | 62090  | 62349  | 1.35E-03  | 1    |
| 29867 | 84910  | 85599  | 3.13E-14  | 0.81 |
| 29867 | 112367 | 112738 | 1.38E-13  | 0.92 |
| 29867 | 117486 | 117774 | 6.90E-13  | 0.86 |
| 29867 | 120675 | 120895 | 1.91E-23  | 0.82 |
| 29867 | 157436 | 157977 | 8.20E-21  | 0.91 |
| 29867 | 159421 | 159823 | 1.97E-09  | 0.83 |
| 29867 | 203460 | 204338 | 1.34E-30  | 0.66 |
| 29867 | 237686 | 238119 | 3.38E-05  | 0.83 |
| 29867 | 274840 | 275191 | 6.01E-12  | 0.79 |
| 29867 | 304611 | 304916 | 1.56E-06  | 0.81 |

|       |        |        |           |      |
|-------|--------|--------|-----------|------|
| 29867 | 398292 | 400344 | 6.16E-41  | 0.81 |
| 29867 | 402571 | 403168 | 1.17E-23  | 0.82 |
| 29867 | 404887 | 405866 | 1.22E-56  | 0.88 |
| 29867 | 406188 | 407484 | 1.24E-96  | 0.88 |
| 29867 | 407694 | 409619 | 5.77E-53  | 0.67 |
| 29867 | 496932 | 497178 | 7.69E-25  | 0.95 |
| 29867 | 519740 | 520119 | 1.13E-44  | 0.9  |
| 29867 | 522537 | 523972 | 6.45E-53  | 0.67 |
| 29867 | 524528 | 524761 | 1.16E-09  | 0.83 |
| 29867 | 530629 | 531175 | 9.10E-14  | 0.77 |
| 29867 | 531845 | 532409 | 1.40E-17  | 0.76 |
| 29867 | 532937 | 533763 | 1.61E-72  | 0.92 |
| 29867 | 539361 | 539788 | 1.55E-17  | 0.94 |
| 29867 | 540465 | 540907 | 6.65E-27  | 0.87 |
| 29867 | 544943 | 545473 | 9.27E-20  | 0.9  |
| 29867 | 549973 | 550730 | 6.36E-46  | 0.97 |
| 29867 | 557668 | 558237 | 6.36E-06  | 0.93 |
| 29867 | 569061 | 569661 | 2.52E-20  | 0.92 |
| 29867 | 571977 | 572558 | 7.20E-08  | 0.67 |
| 29867 | 574036 | 574582 | 1.45E-97  | 0.92 |
| 29867 | 581277 | 583683 | 3.08E-105 | 0.89 |
| 29867 | 590137 | 590734 | 3.92E-10  | 0.86 |
| 29867 | 590545 | 591080 | 4.97E-12  | 0.8  |
| 29867 | 597337 | 598179 | 3.76E-36  | 0.9  |
| 29867 | 601148 | 601541 | 9.01E-06  | 0.85 |
| 29868 | 28580  | 28850  | 1.75E-15  | 0.89 |
| 29868 | 54569  | 55027  | 5.39E-25  | 0.96 |
| 29868 | 55536  | 57126  | 1.93E-64  | 0.62 |
| 29868 | 59072  | 59671  | 6.95E-20  | 0.73 |
| 29868 | 61904  | 63134  | 5.28E-36  | 0.74 |
| 29868 | 80116  | 80976  | 1.94E-33  | 0.75 |
| 29868 | 82411  | 82777  | 5.39E-11  | 0.75 |
| 29868 | 99436  | 99935  | 1.03E-20  | 0.65 |
| 29868 | 100142 | 100696 | 2.25E-45  | 0.94 |
| 29868 | 101119 | 102244 | 4.42E-48  | 0.78 |
| 29868 | 104345 | 105024 | 1.20E-34  | 0.88 |
| 29868 | 106813 | 107562 | 5.22E-22  | 0.67 |
| 29868 | 122854 | 123441 | 2.96E-20  | 0.81 |
| 29868 | 146445 | 146899 | 3.47E-10  | 0.77 |
| 29868 | 147136 | 147413 | 1.39E-23  | 0.89 |
| 29868 | 164117 | 164816 | 6.70E-28  | 0.8  |
| 29869 | 34334  | 34631  | 6.03E-22  | 0.93 |
| 29869 | 68054  | 68347  | 1.27E-15  | 0.9  |
| 29869 | 68811  | 69377  | 8.93E-11  | 0.85 |
| 29869 | 74027  | 74886  | 4.20E-35  | 0.67 |
| 29869 | 87567  | 88120  | 5.71E-28  | 0.87 |
| 29869 | 91973  | 93298  | 5.94E-80  | 0.84 |
| 29869 | 120734 | 121011 | 1.07E-14  | 0.74 |
| 29869 | 134824 | 135302 | 6.96E-35  | 0.88 |
| 29869 | 185692 | 186298 | 1.32E-15  | 0.69 |
| 29869 | 209382 | 209803 | 1.17E-25  | 0.95 |
| 29869 | 210219 | 210842 | 8.63E-32  | 0.97 |
| 29869 | 245693 | 246445 | 7.70E-47  | 0.96 |

|       |        |        |           |      |
|-------|--------|--------|-----------|------|
| 29869 | 247653 | 248451 | 4.85E-49  | 0.93 |
| 29869 | 248697 | 250943 | 1.47E-91  | 0.88 |
| 29869 | 255672 | 256060 | 2.93E-33  | 0.87 |
| 29869 | 258365 | 258718 | 6.91E-36  | 0.94 |
| 29869 | 277648 | 278135 | 3.91E-46  | 0.83 |
| 29869 | 278720 | 279212 | 2.00E-20  | 0.87 |
| 29869 | 291617 | 292086 | 3.72E-59  | 0.96 |
| 29869 | 301194 | 301650 | 1.04E-18  | 0.75 |
| 29869 | 310366 | 310734 | 7.14E-37  | 0.85 |
| 29869 | 332607 | 333354 | 2.51E-21  | 0.79 |
| 29869 | 334809 | 335182 | 5.94E-62  | 0.94 |
| 29869 | 366880 | 367354 | 2.86E-43  | 0.68 |
| 29869 | 368149 | 368692 | 1.09E-42  | 0.82 |
| 29869 | 369439 | 369913 | 9.56E-19  | 0.71 |
| 29869 | 371319 | 371787 | 1.97E-16  | 0.86 |
| 29869 | 372030 | 373019 | 2.67E-49  | 0.87 |
| 29869 | 374185 | 374413 | 2.77E-18  | 0.95 |
| 29869 | 383831 | 384531 | 1.80E-28  | 0.62 |
| 29869 | 393418 | 394548 | 1.52E-38  | 0.84 |
| 29869 | 404710 | 405038 | 2.08E-26  | 0.95 |
| 29869 | 419258 | 420578 | 6.29E-49  | 0.82 |
| 29869 | 420910 | 422875 | 2.33E-62  | 0.73 |
| 29869 | 441780 | 442090 | 8.38E-32  | 0.94 |
| 29869 | 465037 | 465328 | 1.20E-48  | 0.96 |
| 29869 | 469180 | 469610 | 5.64E-35  | 0.84 |
| 29869 | 471993 | 472306 | 2.35E-08  | 0.75 |
| 29869 | 485162 | 485377 | 8.41E-14  | 0.97 |
| 29869 | 496023 | 496504 | 1.18E-19  | 0.86 |
| 29869 | 501297 | 501581 | 1.33E-23  | 0.74 |
| 29869 | 509278 | 509634 | 6.38E-14  | 0.87 |
| 29869 | 513411 | 513739 | 5.70E-10  | 0.91 |
| 29869 | 548542 | 548850 | 1.81E-05  | 0.76 |
| 29869 | 568271 | 568645 | 1.48E-30  | 0.93 |
| 29869 | 630274 | 630694 | 5.63E-115 | 0.92 |
| 29869 | 671164 | 673067 | 1.99E-139 | 0.8  |
| 29869 | 673739 | 674431 | 6.84E-73  | 0.94 |
| 29869 | 675092 | 675883 | 6.60E-80  | 0.9  |
| 29869 | 676223 | 676778 | 3.37E-39  | 0.71 |
| 29869 | 702286 | 702943 | 8.07E-49  | 0.89 |
| 29869 | 703239 | 703694 | 3.89E-42  | 0.95 |
| 29869 | 703945 | 704344 | 4.48E-27  | 0.85 |
| 29872 | 21762  | 22737  | 1.64E-42  | 0.71 |
| 29872 | 39495  | 40533  | 1.34E-42  | 0.76 |
| 29872 | 54416  | 55607  | 1.52E-43  | 0.81 |
| 29872 | 54883  | 55892  | 7.11E-40  | 0.8  |
| 29872 | 56553  | 57790  | 4.50E-62  | 0.84 |
| 29872 | 62113  | 62424  | 5.40E-12  | 0.77 |
| 29872 | 71070  | 71788  | 1.41E-21  | 0.6  |
| 29872 | 105292 | 105626 | 1.01E-38  | 0.97 |
| 29872 | 110007 | 110289 | 6.31E-21  | 0.91 |
| 29872 | 115202 | 115811 | 1.08E-14  | 0.75 |
| 29872 | 127923 | 128373 | 2.49E-33  | 0.92 |
| 29872 | 134772 | 135319 | 1.86E-30  | 0.75 |

|       |        |        |           |      |
|-------|--------|--------|-----------|------|
| 29872 | 135536 | 136067 | 5.53E-23  | 0.79 |
| 29872 | 136328 | 136642 | 8.74E-23  | 0.89 |
| 29872 | 139166 | 139450 | 8.77E-19  | 0.8  |
| 29872 | 139657 | 140173 | 1.85E-32  | 0.93 |
| 29872 | 143578 | 144007 | 5.84E-26  | 0.89 |
| 29872 | 175747 | 176945 | 5.99E-51  | 0.86 |
| 29872 | 179807 | 180027 | 1.40E-17  | 0.73 |
| 29872 | 180716 | 181039 | 2.16E-32  | 0.91 |
| 29872 | 205330 | 206415 | 1.61E-65  | 0.78 |
| 29872 | 210412 | 212597 | 1.58E-91  | 0.85 |
| 29872 | 215851 | 217220 | 1.26E-51  | 0.71 |
| 29872 | 217448 | 217734 | 1.38E-19  | 0.8  |
| 29872 | 218001 | 218469 | 5.14E-39  | 0.88 |
| 29872 | 225687 | 226173 | 2.98E-57  | 0.95 |
| 29873 | 2388   | 2646   | 2.65E-31  | 0.87 |
| 29873 | 23858  | 24136  | 1.36E-49  | 0.82 |
| 29873 | 37726  | 38224  | 1.06E-60  | 0.95 |
| 29873 | 38461  | 38978  | 2.29E-140 | 0.95 |
| 29873 | 50425  | 50677  | 1.94E-44  | 0.93 |
| 29873 | 53118  | 53529  | 3.82E-05  | 1    |
| 29873 | 83550  | 84224  | 4.21E-68  | 0.95 |
| 29873 | 141548 | 141756 | 6.23E-14  | 0.94 |
| 29873 | 149662 | 150847 | 4.06E-25  | 0.75 |
| 29873 | 169681 | 169961 | 1.03E-06  | 0.83 |
| 29873 | 192489 | 192741 | 1.91E-13  | 0.8  |
| 29876 | 16789  | 17162  | 2.23E-43  | 0.9  |
| 29876 | 17389  | 17966  | 1.10E-34  | 0.9  |
| 29876 | 56191  | 56877  | 5.25E-34  | 0.77 |
| 29876 | 111123 | 112222 | 1.05E-43  | 0.87 |
| 29876 | 112447 | 112680 | 1.13E-37  | 0.94 |
| 29876 | 144282 | 145572 | 3.16E-49  | 0.83 |
| 29877 | 16398  | 16675  | 1.12E-09  | 0.81 |
| 29877 | 35042  | 35454  | 1.54E-12  | 0.83 |
| 29877 | 43645  | 44086  | 1.80E-53  | 0.9  |
| 29877 | 51562  | 51895  | 7.37E-28  | 0.95 |
| 29877 | 53618  | 54168  | 6.32E-21  | 0.89 |
| 29877 | 59096  | 59654  | 5.01E-37  | 0.87 |
| 29877 | 59864  | 60732  | 3.12E-40  | 0.74 |
| 29877 | 65390  | 65976  | 2.11E-48  | 0.95 |
| 29877 | 101595 | 101850 | 1.52E-12  | 0.7  |
| 29877 | 107583 | 108048 | 9.82E-36  | 0.82 |
| 29877 | 133389 | 134019 | 7.75E-20  | 0.74 |
| 29877 | 142664 | 144200 | 3.06E-130 | 0.91 |
| 29877 | 146613 | 147950 | 5.09E-63  | 0.81 |
| 29877 | 166365 | 166683 | 1.01E-11  | 0.81 |
| 29877 | 166920 | 167525 | 1.16E-28  | 0.88 |
| 29877 | 168684 | 170034 | 4.74E-49  | 0.72 |
| 29877 | 176851 | 177176 | 5.11E-10  | 0.87 |
| 29877 | 178379 | 179046 | 1.98E-28  | 0.81 |
| 29877 | 178424 | 179383 | 2.00E-33  | 0.81 |
| 29877 | 181275 | 182674 | 2.71E-46  | 0.77 |
| 29877 | 197002 | 197353 | 1.72E-21  | 0.8  |
| 29877 | 200148 | 200365 | 2.40E-17  | 0.64 |



|       |        |        |           |      |
|-------|--------|--------|-----------|------|
| 29877 | 204960 | 205473 | 1.34E-63  | 0.95 |
| 29877 | 206323 | 207418 | 2.07E-52  | 0.68 |
| 29877 | 237992 | 238241 | 2.80E-08  | 0.82 |
| 29878 | 36833  | 37367  | 3.68E-22  | 0.86 |
| 29878 | 49858  | 51411  | 3.52E-58  | 0.89 |
| 29878 | 71844  | 72401  | 2.78E-48  | 0.81 |
| 29878 | 89316  | 89610  | 8.21E-28  | 0.79 |
| 29878 | 106034 | 106513 | 3.61E-31  | 0.9  |
| 29878 | 106794 | 107558 | 3.56E-119 | 0.93 |
| 29878 | 107767 | 108914 | 4.91E-85  | 0.94 |
| 29878 | 118372 | 118892 | 3.88E-26  | 0.6  |
| 29878 | 142404 | 142797 | 2.83E-39  | 0.9  |
| 29878 | 160126 | 160384 | 3.93E-31  | 0.79 |
| 29878 | 161264 | 161914 | 8.64E-47  | 0.91 |
| 29880 | 108980 | 110000 | 2.01E-43  | 0.93 |
| 29880 | 111115 | 111520 | 4.77E-23  | 0.92 |
| 29880 | 120233 | 120578 | 6.07E-18  | 0.95 |
| 29880 | 123182 | 124623 | 2.50E-84  | 0.88 |
| 29880 | 126381 | 126842 | 1.78E-24  | 0.97 |
| 29880 | 240982 | 241381 | 3.11E-08  | 0.84 |
| 29881 | 45660  | 45963  | 6.55E-15  | 0.9  |
| 29881 | 87067  | 87496  | 8.33E-23  | 0.95 |
| 29881 | 143063 | 143386 | 9.43E-10  | 0.81 |
| 29881 | 151268 | 151575 | 4.80E-17  | 0.77 |
| 29881 | 153647 | 155040 | 5.34E-54  | 0.79 |
| 29881 | 167433 | 167777 | 2.75E-12  | 0.98 |
| 29881 | 247867 | 248317 | 5.79E-13  | 0.92 |
| 29881 | 248518 | 249014 | 3.33E-33  | 0.98 |
| 29881 | 286140 | 286343 | 2.31E-07  | 0.82 |
| 29881 | 290897 | 291110 | 5.13E-10  | 0.93 |
| 29881 | 297527 | 299398 | 1.83E-58  | 0.85 |
| 29881 | 299718 | 300374 | 4.70E-41  | 0.86 |
| 29881 | 308796 | 309170 | 9.01E-07  | 0.93 |
| 29881 | 319446 | 319914 | 1.34E-46  | 0.96 |
| 29881 | 327742 | 328023 | 3.05E-32  | 0.8  |
| 29881 | 328355 | 329103 | 6.57E-53  | 0.83 |
| 29881 | 371083 | 371510 | 2.38E-07  | 0.67 |
| 29881 | 407856 | 408521 | 1.18E-12  | 0.95 |
| 29881 | 414172 | 414429 | 3.71E-13  | 0.96 |
| 29883 | 32030  | 32240  | 9.78E-23  | 0.88 |
| 29883 | 37912  | 38240  | 1.32E-07  | 0.66 |
| 29883 | 40810  | 41249  | 1.03E-28  | 0.78 |
| 29883 | 41521  | 43028  | 8.48E-60  | 0.79 |
| 29883 | 43630  | 45026  | 8.52E-70  | 0.88 |
| 29883 | 91400  | 91696  | 2.38E-12  | 0.78 |
| 29883 | 107609 | 108194 | 4.46E-21  | 0.9  |
| 29883 | 112329 | 112931 | 1.09E-19  | 0.79 |
| 29883 | 120610 | 121083 | 4.23E-20  | 0.78 |
| 29883 | 159435 | 160231 | 3.82E-26  | 0.77 |
| 29883 | 177579 | 178225 | 4.52E-15  | 0.83 |
| 29883 | 182188 | 182625 | 5.33E-23  | 0.79 |
| 29883 | 206292 | 207244 | 1.17E-55  | 0.9  |
| 29883 | 207592 | 208244 | 4.91E-71  | 0.83 |

|       |        |        |           |      |
|-------|--------|--------|-----------|------|
| 29883 | 210124 | 210866 | 6.53E-12  | 0.79 |
| 29883 | 211992 | 212394 | 6.01E-16  | 0.67 |
| 29883 | 243875 | 244341 | 1.67E-12  | 0.62 |
| 29883 | 297374 | 298390 | 1.98E-36  | 0.8  |
| 29883 | 306636 | 307380 | 3.02E-92  | 0.96 |
| 29883 | 309103 | 309479 | 2.60E-35  | 0.94 |
| 29883 | 309823 | 310314 | 1.06E-36  | 0.86 |
| 29883 | 310727 | 311042 | 4.55E-30  | 0.92 |
| 29883 | 311264 | 311555 | 8.40E-30  | 0.73 |
| 29883 | 313262 | 314198 | 6.26E-99  | 0.91 |
| 29883 | 331406 | 332204 | 2.48E-33  | 0.73 |
| 29883 | 333933 | 334320 | 3.31E-12  | 0.78 |
| 29883 | 335395 | 336137 | 5.00E-42  | 0.78 |
| 29883 | 360322 | 360549 | 1.10E-10  | 0.84 |
| 29883 | 376595 | 378068 | 1.24E-56  | 0.84 |
| 29883 | 401333 | 402032 | 4.35E-52  | 0.83 |
| 29883 | 403617 | 404867 | 1.45E-40  | 0.71 |
| 29883 | 413463 | 414911 | 6.96E-65  | 0.81 |
| 29883 | 415279 | 415776 | 6.98E-19  | 0.75 |
| 29883 | 431407 | 432580 | 6.54E-39  | 0.79 |
| 29883 | 451037 | 451295 | 2.45E-16  | 0.61 |
| 29883 | 456827 | 457600 | 1.15E-38  | 0.73 |
| 29883 | 461755 | 462008 | 2.82E-14  | 0.63 |
| 29883 | 465372 | 465786 | 3.60E-08  | 0.76 |
| 29883 | 471642 | 472015 | 2.44E-50  | 0.87 |
| 29883 | 472437 | 472899 | 1.87E-32  | 0.76 |
| 29883 | 498860 | 499425 | 1.04E-33  | 0.85 |
| 29883 | 503269 | 503588 | 1.59E-14  | 0.82 |
| 29883 | 504444 | 504744 | 8.79E-44  | 0.9  |
| 29883 | 505234 | 505445 | 2.80E-44  | 0.87 |
| 29883 | 530486 | 530872 | 2.77E-10  | 0.73 |
| 29883 | 573172 | 573516 | 3.00E-15  | 0.78 |
| 29883 | 581526 | 583318 | 1.30E-86  | 0.83 |
| 29883 | 617472 | 617911 | 2.49E-25  | 0.84 |
| 29883 | 621936 | 622463 | 2.11E-35  | 0.86 |
| 29883 | 646713 | 647193 | 6.88E-15  | 0.82 |
| 29883 | 655515 | 655756 | 1.49E-31  | 0.94 |
| 29883 | 663693 | 665289 | 3.72E-76  | 0.84 |
| 29883 | 665585 | 666038 | 3.04E-33  | 0.93 |
| 29883 | 669598 | 669900 | 8.38E-30  | 0.88 |
| 29883 | 670199 | 671268 | 4.25E-29  | 0.76 |
| 29883 | 717294 | 718165 | 2.88E-31  | 0.76 |
| 29884 | 49422  | 49788  | 9.71E-23  | 0.86 |
| 29884 | 52092  | 52795  | 6.36E-28  | 0.83 |
| 29884 | 56480  | 56745  | 2.34E-13  | 0.78 |
| 29885 | 6783   | 7002   | 3.83E-12  | 0.73 |
| 29885 | 11238  | 11943  | 3.51E-16  | 0.8  |
| 29885 | 16834  | 17434  | 4.02E-30  | 0.77 |
| 29885 | 26741  | 27441  | 1.37E-10  | 0.78 |
| 29885 | 31416  | 33037  | 2.79E-133 | 0.78 |
| 29885 | 54441  | 54779  | 4.39E-34  | 0.7  |
| 29885 | 55457  | 57301  | 3.04E-52  | 0.72 |
| 29885 | 59105  | 60408  | 5.03E-81  | 0.83 |

|       |        |        |           |      |
|-------|--------|--------|-----------|------|
| 29887 | 18430  | 18775  | 4.61E-11  | 0.83 |
| 29887 | 18983  | 19900  | 3.16E-41  | 0.71 |
| 29887 | 25092  | 25449  | 1.15E-23  | 0.6  |
| 29888 | 1611   | 1943   | 8.29E-19  | 0.93 |
| 29888 | 2291   | 2704   | 2.13E-18  | 0.96 |
| 29888 | 46508  | 48248  | 2.89E-68  | 0.73 |
| 29888 | 49099  | 50104  | 5.87E-68  | 0.89 |
| 29888 | 63667  | 64504  | 3.34E-35  | 0.8  |
| 29888 | 74277  | 74754  | 3.44E-08  | 0.76 |
| 29888 | 75506  | 76021  | 6.21E-16  | 0.81 |
| 29888 | 88745  | 89019  | 2.19E-27  | 0.95 |
| 29888 | 103834 | 104965 | 8.90E-44  | 0.81 |
| 29888 | 106024 | 106816 | 9.20E-61  | 0.71 |
| 29888 | 114582 | 115047 | 6.48E-53  | 0.98 |
| 29888 | 123181 | 123529 | 7.66E-11  | 0.77 |
| 29888 | 143717 | 144376 | 4.94E-29  | 0.94 |
| 29888 | 144641 | 145003 | 1.07E-64  | 0.97 |
| 29888 | 149149 | 149382 | 4.68E-28  | 0.91 |
| 29888 | 213149 | 213742 | 7.41E-41  | 0.89 |
| 29889 | 13034  | 13364  | 5.22E-19  | 0.69 |
| 29889 | 18998  | 19582  | 5.21E-31  | 0.8  |
| 29889 | 31821  | 32202  | 1.12E-19  | 0.91 |
| 29889 | 37231  | 38426  | 2.07E-75  | 0.77 |
| 29889 | 38639  | 38981  | 5.36E-14  | 0.9  |
| 29889 | 41427  | 42496  | 9.88E-64  | 0.75 |
| 29889 | 57889  | 58335  | 3.93E-09  | 0.85 |
| 29889 | 59447  | 59673  | 1.10E-06  | 0.65 |
| 29889 | 64261  | 65394  | 5.87E-54  | 0.64 |
| 29889 | 74778  | 76251  | 1.16E-229 | 0.93 |
| 29889 | 76569  | 77630  | 1.92E-166 | 0.83 |
| 29889 | 96403  | 97366  | 2.79E-30  | 0.78 |
| 29889 | 96489  | 97435  | 1.05E-35  | 0.82 |
| 29889 | 100188 | 100601 | 3.56E-20  | 0.84 |
| 29889 | 107613 | 108453 | 5.35E-28  | 0.82 |
| 29889 | 108808 | 109334 | 1.71E-44  | 0.89 |
| 29889 | 140435 | 140941 | 4.47E-12  | 0.81 |
| 29889 | 142601 | 143059 | 7.03E-15  | 0.8  |
| 29889 | 145781 | 145997 | 6.75E-39  | 0.84 |
| 29889 | 154651 | 155441 | 4.42E-26  | 0.82 |
| 29889 | 158309 | 158956 | 5.66E-21  | 0.8  |
| 29889 | 170194 | 170567 | 1.70E-28  | 0.88 |
| 29889 | 172278 | 173007 | 2.76E-27  | 0.83 |
| 29889 | 187858 | 188259 | 2.32E-24  | 0.79 |
| 29889 | 189062 | 189717 | 6.20E-35  | 0.8  |
| 29889 | 190008 | 190648 | 1.25E-67  | 0.86 |
| 29889 | 196066 | 197881 | 8.55E-117 | 0.88 |
| 29889 | 198501 | 198815 | 2.09E-22  | 0.88 |
| 29889 | 218820 | 219615 | 3.31E-29  | 0.62 |
| 29889 | 227667 | 228841 | 3.68E-61  | 0.86 |
| 29889 | 240156 | 241703 | 1.10E-32  | 0.8  |
| 29889 | 240390 | 241797 | 1.93E-29  | 0.8  |
| 29889 | 243326 | 243568 | 8.90E-22  | 0.81 |
| 29889 | 258936 | 259189 | 1.13E-18  | 0.86 |

|       |        |        |           |      |
|-------|--------|--------|-----------|------|
| 29889 | 260257 | 261099 | 8.60E-44  | 0.81 |
| 29889 | 262027 | 262519 | 1.07E-24  | 0.87 |
| 29889 | 262871 | 263196 | 2.68E-08  | 0.72 |
| 29889 | 281124 | 281773 | 4.04E-39  | 0.73 |
| 29889 | 297338 | 297956 | 1.64E-29  | 0.76 |
| 29889 | 303692 | 303911 | 5.59E-19  | 0.92 |
| 29889 | 304155 | 305660 | 3.93E-109 | 0.94 |
| 29889 | 358626 | 359065 | 1.55E-27  | 0.78 |
| 29889 | 359752 | 360123 | 7.24E-27  | 0.86 |
| 29889 | 365530 | 366146 | 1.27E-26  | 0.88 |
| 29889 | 420211 | 421764 | 1.01E-56  | 0.83 |
| 29889 | 422839 | 423368 | 2.62E-35  | 0.84 |
| 29889 | 426707 | 427079 | 8.73E-31  | 0.89 |
| 29889 | 427478 | 427714 | 3.82E-12  | 0.91 |
| 29889 | 428928 | 429305 | 9.98E-16  | 0.77 |
| 29889 | 476734 | 477185 | 1.41E-14  | 0.7  |
| 29889 | 489305 | 489707 | 5.37E-36  | 0.94 |
| 29889 | 492632 | 494152 | 3.41E-86  | 0.68 |
| 29889 | 500205 | 501230 | 7.74E-38  | 0.81 |
| 29889 | 506387 | 507057 | 1.33E-38  | 0.82 |
| 29889 | 507310 | 508688 | 2.05E-65  | 0.8  |
| 29889 | 515077 | 515533 | 1.19E-30  | 0.74 |
| 29889 | 523271 | 524082 | 5.24E-66  | 0.83 |
| 29889 | 545815 | 546046 | 1.17E-21  | 0.73 |
| 29889 | 578969 | 579486 | 1.68E-24  | 0.87 |
| 29889 | 580753 | 581609 | 6.13E-47  | 0.89 |
| 29889 | 582154 | 582811 | 1.42E-26  | 0.84 |
| 29889 | 583072 | 584147 | 3.58E-40  | 0.84 |
| 29889 | 585126 | 585370 | 1.98E-21  | 0.87 |
| 29889 | 589161 | 589570 | 2.09E-15  | 0.78 |
| 29889 | 609601 | 610851 | 5.19E-100 | 0.88 |
| 29889 | 619205 | 619460 | 7.17E-30  | 0.93 |
| 29889 | 619705 | 621119 | 4.99E-60  | 0.83 |
| 29889 | 632528 | 633044 | 1.10E-15  | 0.79 |
| 29889 | 638613 | 638848 | 1.35E-07  | 0.95 |
| 29889 | 641507 | 642036 | 1.10E-19  | 0.83 |
| 29889 | 646132 | 646835 | 2.04E-51  | 0.88 |
| 29889 | 649007 | 649219 | 8.19E-17  | 0.9  |
| 29889 | 650846 | 651987 | 5.57E-68  | 0.87 |
| 29889 | 652442 | 652730 | 1.60E-25  | 0.86 |
| 29889 | 654553 | 655282 | 2.81E-56  | 0.89 |
| 29889 | 661120 | 661846 | 6.01E-33  | 0.84 |
| 29889 | 679556 | 679979 | 3.88E-14  | 0.69 |
| 29889 | 681885 | 682596 | 1.06E-32  | 0.81 |
| 29889 | 698295 | 698700 | 7.23E-61  | 0.76 |
| 29889 | 707909 | 708774 | 6.72E-31  | 0.81 |
| 29889 | 709832 | 710190 | 3.63E-20  | 0.78 |
| 29889 | 710867 | 711772 | 8.63E-77  | 0.82 |
| 29889 | 712668 | 712989 | 6.34E-19  | 0.89 |
| 29889 | 723104 | 723700 | 1.92E-15  | 0.61 |
| 29889 | 723995 | 725489 | 1.95E-50  | 0.69 |
| 29889 | 725713 | 727218 | 5.12E-85  | 0.81 |
| 29889 | 733328 | 734369 | 7.70E-60  | 0.86 |

|       |         |         |           |      |
|-------|---------|---------|-----------|------|
| 29889 | 736089  | 736815  | 1.29E-26  | 0.72 |
| 29889 | 738849  | 739847  | 3.59E-50  | 0.85 |
| 29889 | 756707  | 756949  | 1.50E-17  | 0.81 |
| 29889 | 758351  | 759040  | 7.40E-29  | 0.84 |
| 29889 | 775179  | 776561  | 5.07E-37  | 0.83 |
| 29889 | 803653  | 803874  | 9.71E-06  | 0.88 |
| 29889 | 825010  | 825332  | 2.66E-37  | 0.83 |
| 29889 | 835522  | 835971  | 7.96E-49  | 0.85 |
| 29889 | 842411  | 843860  | 5.93E-47  | 0.69 |
| 29889 | 850232  | 850485  | 3.41E-26  | 0.86 |
| 29889 | 862790  | 863947  | 3.40E-58  | 0.76 |
| 29889 | 899301  | 899684  | 9.96E-27  | 0.88 |
| 29889 | 904221  | 904713  | 3.90E-18  | 0.84 |
| 29889 | 914840  | 915237  | 3.08E-19  | 0.87 |
| 29889 | 932135  | 932436  | 4.51E-15  | 0.77 |
| 29889 | 933772  | 934430  | 5.36E-26  | 0.84 |
| 29889 | 961020  | 961348  | 7.29E-14  | 0.78 |
| 29889 | 962070  | 962639  | 1.47E-13  | 0.75 |
| 29889 | 981436  | 981729  | 3.59E-25  | 0.85 |
| 29889 | 1009652 | 1009884 | 7.18E-08  | 0.27 |
| 29890 | 61612   | 62024   | 2.55E-04  | 0.9  |
| 29890 | 113239  | 113517  | 9.71E-19  | 0.93 |
| 29890 | 119971  | 120357  | 9.31E-09  | 0.94 |
| 29890 | 126432  | 126711  | 4.36E-13  | 0.89 |
| 29890 | 146106  | 146343  | 8.28E-13  | 0.9  |
| 29890 | 286295  | 286967  | 3.20E-06  | 0.84 |
| 29890 | 297272  | 297629  | 2.41E-10  | 0.86 |
| 29891 | 13125   | 13607   | 3.10E-17  | 0.94 |
| 29891 | 43152   | 43381   | 2.11E-10  | 0.9  |
| 29891 | 57673   | 58095   | 3.17E-17  | 0.93 |
| 29895 | 33912   | 34128   | 2.36E-12  | 0.77 |
| 29896 | 18147   | 18581   | 3.48E-05  | 0.9  |
| 29896 | 29725   | 32716   | 1.03E-125 | 0.67 |
| 29896 | 38857   | 39193   | 2.79E-14  | 0.82 |
| 29896 | 43372   | 44885   | 1.32E-54  | 0.93 |
| 29896 | 45185   | 46823   | 6.48E-104 | 0.87 |
| 29896 | 50537   | 51068   | 1.91E-41  | 0.99 |
| 29896 | 51623   | 52345   | 4.86E-16  | 0.72 |
| 29896 | 69192   | 69523   | 9.83E-12  | 0.78 |
| 29896 | 70820   | 71514   | 8.21E-14  | 0.62 |
| 29897 | 13750   | 14285   | 6.96E-09  | 0.92 |
| 29897 | 16177   | 16488   | 7.09E-04  | 1    |
| 29897 | 17024   | 17581   | 1.17E-05  | 0.76 |
| 29897 | 22737   | 23103   | 6.33E-11  | 0.7  |
| 29897 | 58079   | 58672   | 8.81E-28  | 0.9  |
| 29897 | 70930   | 72734   | 1.70E-26  | 0.85 |
| 29897 | 76054   | 76531   | 5.07E-44  | 0.84 |
| 29897 | 78308   | 78926   | 1.00E-32  | 0.96 |
| 29897 | 80274   | 81604   | 4.03E-76  | 0.62 |
| 29897 | 82287   | 82551   | 7.33E-34  | 0.89 |
| 29897 | 93351   | 94091   | 1.56E-63  | 0.94 |
| 29897 | 98555   | 98970   | 3.41E-09  | 0.92 |
| 29897 | 105626  | 106770  | 1.39E-38  | 0.9  |

|       |        |        |           |      |
|-------|--------|--------|-----------|------|
| 29897 | 110604 | 111425 | 1.51E-08  | 0.7  |
| 29897 | 120920 | 121568 | 6.59E-09  | 0.97 |
| 29897 | 122686 | 123037 | 2.10E-06  | 0.8  |
| 29897 | 125201 | 125445 | 1.36E-05  | 0.81 |
| 29897 | 132332 | 133001 | 7.15E-15  | 0.67 |
| 29897 | 136990 | 137222 | 6.63E-10  | 0.8  |
| 29897 | 137450 | 139447 | 7.61E-164 | 0.92 |
| 29897 | 143350 | 143875 | 2.54E-16  | 0.73 |
| 29897 | 146456 | 147073 | 6.70E-18  | 0.76 |
| 29897 | 147186 | 148296 | 1.22E-67  | 0.91 |
| 29897 | 152682 | 153074 | 3.63E-23  | 0.93 |
| 29897 | 157058 | 157304 | 1.26E-16  | 0.82 |
| 29897 | 157916 | 158404 | 2.75E-14  | 0.83 |
| 29897 | 158710 | 159508 | 2.87E-09  | 0.6  |
| 29897 | 161108 | 163499 | 5.24E-82  | 0.61 |
| 29897 | 171835 | 172228 | 5.35E-25  | 0.72 |
| 29897 | 173525 | 175729 | 2.99E-107 | 0.65 |
| 29897 | 179509 | 179903 | 1.80E-26  | 0.91 |
| 29897 | 182215 | 182634 | 8.58E-12  | 0.83 |
| 29897 | 188379 | 188644 | 2.31E-19  | 0.62 |
| 29897 | 214688 | 215224 | 3.61E-20  | 0.86 |
| 29897 | 232887 | 233650 | 2.37E-34  | 0.73 |
| 29897 | 290366 | 290845 | 6.28E-10  | 0.84 |
| 29898 | 9564   | 9829   | 6.57E-12  | 1    |
| 29899 | 94780  | 95068  | 3.93E-08  | 0.85 |
| 29899 | 109896 | 110174 | 2.54E-04  | 0.87 |
| 29899 | 110663 | 110955 | 5.16E-04  | 1    |
| 29899 | 111016 | 111296 | 3.21E-05  | 0.89 |
| 29899 | 116843 | 117395 | 1.55E-05  | 0.93 |
| 29899 | 126141 | 126552 | 9.35E-20  | 0.87 |
| 29899 | 140663 | 141643 | 2.80E-51  | 0.9  |
| 29899 | 148072 | 148472 | 4.45E-13  | 0.81 |
| 29899 | 148355 | 148611 | 1.07E-09  | 0.79 |
| 29899 | 192632 | 193165 | 4.03E-08  | 1    |
| 29899 | 206119 | 206565 | 1.08E-04  | 0.79 |
| 29899 | 223176 | 223381 | 3.64E-05  | 1    |
| 29899 | 260253 | 260496 | 2.19E-05  | 0.94 |
| 29899 | 272583 | 272848 | 5.15E-05  | 0.8  |
| 29899 | 273552 | 273822 | 1.53E-07  | 0.82 |
| 29899 | 283891 | 284262 | 1.55E-11  | 0.81 |
| 29899 | 294899 | 295330 | 1.09E-08  | 0.92 |
| 29900 | 8502   | 8847   | 7.68E-37  | 0.78 |
| 29900 | 9360   | 10066  | 1.83E-23  | 0.63 |
| 29900 | 48297  | 48759  | 2.38E-27  | 0.97 |
| 29900 | 62925  | 63366  | 4.56E-18  | 0.92 |
| 29900 | 78144  | 78458  | 2.70E-12  | 0.81 |
| 29900 | 108104 | 109931 | 1.40E-55  | 0.73 |
| 29900 | 111099 | 111451 | 7.03E-19  | 0.85 |
| 29900 | 113981 | 116193 | 3.81E-104 | 0.88 |
| 29900 | 116447 | 117199 | 5.67E-44  | 0.9  |
| 29900 | 117411 | 118054 | 9.94E-19  | 0.85 |
| 29900 | 119646 | 120107 | 2.57E-12  | 0.76 |
| 29900 | 119819 | 120161 | 7.54E-12  | 0.76 |

|       |        |        |          |      |
|-------|--------|--------|----------|------|
| 29900 | 160715 | 161144 | 6.97E-12 | 0.76 |
| 29900 | 164935 | 166060 | 3.11E-42 | 0.81 |
| 29900 | 181687 | 182092 | 2.76E-15 | 0.62 |
| 29900 | 207343 | 207879 | 3.76E-37 | 0.62 |
| 29900 | 208927 | 209318 | 8.22E-20 | 0.95 |
| 29900 | 224911 | 225209 | 3.09E-09 | 0.92 |
| 29900 | 242593 | 243413 | 3.09E-38 | 0.71 |
| 29900 | 252204 | 252943 | 1.69E-32 | 0.66 |
| 29900 | 276541 | 277508 | 4.20E-47 | 0.81 |
| 29900 | 308948 | 309278 | 1.69E-18 | 0.65 |
| 29900 | 390426 | 391128 | 2.58E-12 | 0.65 |
| 29900 | 416409 | 417117 | 7.79E-38 | 0.69 |
| 29900 | 422535 | 423084 | 1.47E-43 | 0.89 |
| 29900 | 431075 | 431290 | 1.34E-08 | 0.73 |
| 29900 | 443491 | 443791 | 1.00E-54 | 0.89 |
| 29900 | 444321 | 444638 | 3.54E-39 | 0.9  |
| 29900 | 444973 | 445860 | 1.28E-46 | 0.66 |
| 29900 | 457674 | 458117 | 5.18E-17 | 0.87 |
| 29900 | 506412 | 507036 | 9.26E-25 | 0.81 |
| 29900 | 544964 | 545773 | 3.10E-21 | 0.62 |
| 29900 | 549441 | 550099 | 2.04E-70 | 0.91 |
| 29901 | 42613  | 43347  | 4.38E-26 | 0.7  |
| 29901 | 57253  | 57745  | 4.46E-11 | 0.79 |
| 29901 | 80392  | 80654  | 1.31E-09 | 0.67 |
| 29901 | 105157 | 105696 | 8.13E-17 | 0.6  |
| 29901 | 119777 | 119988 | 5.23E-16 | 0.97 |
| 29901 | 144319 | 144850 | 1.54E-26 | 0.86 |
| 29901 | 145682 | 145986 | 1.02E-16 | 0.67 |
| 29901 | 149342 | 149897 | 1.15E-12 | 0.81 |
| 29901 | 175422 | 175802 | 2.17E-28 | 0.93 |
| 29901 | 194312 | 194581 | 2.92E-31 | 0.93 |
| 29901 | 210867 | 211162 | 5.59E-14 | 0.66 |
| 29901 | 220621 | 221034 | 1.06E-24 | 0.85 |
| 29901 | 223030 | 223591 | 5.18E-50 | 0.95 |
| 29901 | 224399 | 224854 | 8.00E-76 | 0.72 |
| 29902 | 7522   | 7919   | 2.16E-06 | 0.83 |
| 29902 | 21606  | 21849  | 1.01E-04 | 0.98 |
| 29902 | 53914  | 54163  | 5.85E-05 | 0.83 |
| 29902 | 60882  | 61229  | 2.47E-07 | 0.81 |
| 29902 | 69759  | 69993  | 2.50E-04 | 0.86 |
| 29902 | 72396  | 72622  | 5.81E-17 | 0.79 |
| 29902 | 83867  | 84108  | 4.41E-29 | 0.81 |
| 29902 | 129809 | 130286 | 7.55E-06 | 0.78 |
| 29902 | 136066 | 136522 | 7.04E-07 | 0.9  |
| 29902 | 143483 | 143912 | 4.49E-03 | 0.84 |
| 29902 | 151069 | 151334 | 6.27E-05 | 0.83 |
| 29902 | 153830 | 154334 | 1.86E-11 | 0.86 |
| 29902 | 154070 | 154411 | 1.11E-06 | 0.8  |
| 29902 | 155584 | 155809 | 1.75E-06 | 0.9  |
| 29902 | 223630 | 223853 | 6.71E-07 | 0.95 |
| 29902 | 241452 | 241987 | 5.02E-08 | 0.9  |
| 29902 | 252897 | 253739 | 5.00E-17 | 0.76 |
| 29902 | 280921 | 281160 | 2.70E-09 | 0.86 |

|       |        |        |           |      |
|-------|--------|--------|-----------|------|
| 29902 | 323112 | 323331 | 1.69E-10  | 0.95 |
| 29902 | 330294 | 330774 | 2.05E-11  | 0.95 |
| 29902 | 339435 | 339700 | 2.68E-06  | 0.81 |
| 29902 | 390131 | 390422 | 6.63E-10  | 0.9  |
| 29902 | 409716 | 410133 | 7.03E-22  | 0.63 |
| 29902 | 410514 | 411035 | 1.26E-08  | 0.71 |
| 29902 | 414249 | 414848 | 2.39E-20  | 0.86 |
| 29902 | 420489 | 421334 | 1.54E-13  | 0.95 |
| 29903 | 12990  | 13194  | 3.03E-10  | 0.65 |
| 29903 | 36598  | 37077  | 3.54E-30  | 0.9  |
| 29903 | 40694  | 42288  | 1.17E-35  | 0.83 |
| 29903 | 48736  | 48958  | 8.63E-36  | 0.9  |
| 29903 | 49167  | 49675  | 6.22E-49  | 0.87 |
| 29903 | 52117  | 52520  | 7.27E-18  | 0.74 |
| 29903 | 53556  | 54005  | 8.21E-32  | 0.88 |
| 29903 | 54418  | 54700  | 6.70E-27  | 0.88 |
| 29903 | 55251  | 55610  | 9.25E-41  | 0.87 |
| 29903 | 88297  | 88791  | 7.38E-32  | 0.85 |
| 29903 | 109245 | 109989 | 2.87E-15  | 0.87 |
| 29903 | 115999 | 116846 | 3.19E-28  | 0.88 |
| 29903 | 135090 | 135292 | 4.75E-70  | 0.94 |
| 29903 | 141137 | 142079 | 1.09E-52  | 0.96 |
| 29903 | 143792 | 145795 | 1.83E-258 | 0.93 |
| 29903 | 150409 | 150815 | 7.82E-30  | 0.89 |
| 29903 | 173885 | 174174 | 3.59E-08  | 0.77 |
| 29903 | 190275 | 190553 | 1.30E-04  | 0.88 |
| 29903 | 243893 | 244257 | 1.43E-13  | 0.79 |
| 29903 | 245347 | 245674 | 1.59E-07  | 0.85 |
| 29903 | 247648 | 248175 | 1.58E-10  | 0.77 |
| 29903 | 248448 | 248976 | 1.92E-12  | 0.8  |
| 29904 | 20349  | 20670  | 5.28E-30  | 0.97 |
| 29904 | 23912  | 24565  | 1.61E-25  | 0.71 |
| 29904 | 27068  | 28774  | 4.61E-103 | 0.87 |
| 29904 | 34492  | 35028  | 1.59E-28  | 0.79 |
| 29904 | 40254  | 40521  | 2.11E-44  | 0.89 |
| 29904 | 40820  | 42930  | 6.82E-103 | 0.87 |
| 29904 | 48656  | 49585  | 1.16E-25  | 0.79 |
| 29904 | 90403  | 91901  | 4.18E-54  | 0.77 |
| 29904 | 92324  | 92581  | 6.05E-15  | 0.8  |
| 29904 | 93407  | 94173  | 3.00E-63  | 0.9  |
| 29904 | 101679 | 102070 | 1.61E-12  | 0.81 |
| 29904 | 104357 | 104910 | 1.88E-35  | 0.92 |
| 29904 | 105660 | 106808 | 1.52E-57  | 0.91 |
| 29904 | 132153 | 132502 | 2.09E-24  | 0.91 |
| 29904 | 135913 | 137424 | 4.08E-44  | 0.76 |
| 29904 | 140964 | 141477 | 7.73E-48  | 0.87 |
| 29904 | 147580 | 147940 | 4.21E-42  | 0.93 |
| 29904 | 148460 | 148997 | 5.13E-22  | 0.84 |
| 29904 | 153439 | 154559 | 2.07E-103 | 0.89 |
| 29904 | 156486 | 157269 | 8.76E-37  | 0.9  |
| 29904 | 160228 | 161966 | 1.72E-64  | 0.82 |
| 29904 | 169021 | 169493 | 1.98E-17  | 0.74 |
| 29904 | 189073 | 189621 | 2.18E-37  | 0.83 |



|       |        |        |           |      |
|-------|--------|--------|-----------|------|
| 29904 | 191668 | 191986 | 3.29E-24  | 0.91 |
| 29904 | 227649 | 228534 | 1.84E-20  | 0.83 |
| 29904 | 229227 | 229702 | 1.61E-24  | 0.91 |
| 29904 | 239093 | 240113 | 2.44E-12  | 0.7  |
| 29904 | 241338 | 241681 | 3.01E-27  | 0.75 |
| 29904 | 246658 | 246967 | 9.02E-04  | 0.81 |
| 29904 | 248434 | 249848 | 2.70E-22  | 0.8  |
| 29904 | 277811 | 279043 | 2.23E-25  | 0.78 |
| 29904 | 284382 | 284722 | 7.30E-27  | 0.76 |
| 29904 | 285201 | 285571 | 3.12E-39  | 0.93 |
| 29904 | 285799 | 286290 | 1.47E-23  | 0.65 |
| 29904 | 322310 | 322823 | 4.19E-33  | 0.67 |
| 29904 | 325840 | 326179 | 5.80E-30  | 0.91 |
| 29904 | 327380 | 327787 | 5.26E-30  | 0.89 |
| 29904 | 328321 | 329403 | 3.02E-51  | 0.82 |
| 29904 | 329610 | 329946 | 2.69E-41  | 0.95 |
| 29904 | 392782 | 393001 | 3.59E-18  | 0.84 |
| 29904 | 393243 | 393533 | 1.96E-38  | 0.89 |
| 29904 | 394029 | 394370 | 4.96E-34  | 0.81 |
| 29904 | 415380 | 415656 | 1.51E-28  | 0.9  |
| 29904 | 425098 | 426250 | 8.93E-42  | 0.64 |
| 29904 | 440792 | 442298 | 9.51E-69  | 0.85 |
| 29904 | 456822 | 458026 | 4.65E-111 | 0.88 |
| 29904 | 458246 | 459171 | 4.69E-53  | 0.89 |
| 29904 | 478219 | 478599 | 1.08E-36  | 0.91 |
| 29904 | 478901 | 480179 | 6.23E-38  | 0.68 |
| 29904 | 495058 | 495469 | 2.59E-24  | 0.89 |
| 29904 | 499238 | 499779 | 5.43E-27  | 0.89 |
| 29904 | 503474 | 504324 | 8.38E-30  | 0.82 |
| 29904 | 519882 | 520464 | 1.47E-35  | 0.84 |
| 29904 | 520725 | 521394 | 6.45E-79  | 0.85 |
| 29904 | 528398 | 529131 | 5.76E-19  | 0.69 |
| 29904 | 529467 | 530809 | 3.84E-45  | 0.78 |
| 29904 | 532972 | 534071 | 1.84E-39  | 0.74 |
| 29904 | 545573 | 546313 | 3.64E-37  | 0.71 |
| 29904 | 550122 | 550757 | 9.36E-22  | 0.88 |
| 29904 | 551992 | 553454 | 9.45E-33  | 0.7  |
| 29904 | 572791 | 573124 | 5.67E-13  | 0.83 |
| 29904 | 573481 | 573836 | 3.06E-29  | 0.89 |
| 29904 | 574412 | 574905 | 6.85E-35  | 0.91 |
| 29904 | 575811 | 576054 | 4.81E-12  | 0.77 |
| 29904 | 578405 | 578800 | 2.18E-13  | 0.64 |
| 29904 | 583127 | 583522 | 3.97E-17  | 0.6  |
| 29904 | 598212 | 599055 | 1.09E-46  | 0.61 |
| 29904 | 603873 | 606398 | 3.18E-111 | 0.75 |
| 29904 | 606664 | 607031 | 8.78E-33  | 0.94 |
| 29904 | 616628 | 617866 | 8.17E-74  | 0.8  |
| 29904 | 622485 | 622799 | 1.81E-17  | 0.85 |
| 29904 | 629857 | 630695 | 7.66E-41  | 0.86 |
| 29904 | 645276 | 646992 | 8.50E-72  | 0.87 |
| 29904 | 647197 | 647836 | 1.12E-62  | 0.96 |
| 29904 | 716905 | 717286 | 1.45E-31  | 0.88 |
| 29904 | 717508 | 717936 | 1.96E-21  | 0.88 |

|       |         |         |          |      |
|-------|---------|---------|----------|------|
| 29904 | 729909  | 730216  | 1.38E-26 | 0.79 |
| 29904 | 730633  | 731077  | 9.93E-19 | 0.87 |
| 29904 | 809782  | 810978  | 1.14E-17 | 0.64 |
| 29904 | 811020  | 811721  | 1.36E-22 | 0.93 |
| 29904 | 816157  | 816655  | 1.36E-19 | 0.9  |
| 29904 | 841151  | 842790  | 8.54E-60 | 0.73 |
| 29904 | 843230  | 843690  | 6.93E-28 | 0.89 |
| 29904 | 843932  | 844184  | 2.01E-25 | 0.91 |
| 29904 | 864332  | 865091  | 9.56E-61 | 0.84 |
| 29904 | 865913  | 866178  | 1.46E-44 | 0.89 |
| 29904 | 866527  | 867344  | 1.96E-40 | 0.72 |
| 29904 | 888840  | 889165  | 7.76E-29 | 0.95 |
| 29904 | 890730  | 891611  | 2.36E-41 | 0.79 |
| 29904 | 910865  | 911265  | 7.38E-45 | 0.9  |
| 29904 | 912893  | 913228  | 2.55E-19 | 0.84 |
| 29904 | 917330  | 918840  | 1.04E-52 | 0.71 |
| 29904 | 923085  | 923485  | 5.77E-05 | 0.81 |
| 29904 | 925062  | 926717  | 1.94E-87 | 0.84 |
| 29904 | 932203  | 932447  | 2.49E-06 | 0.84 |
| 29904 | 933906  | 935267  | 3.22E-85 | 0.89 |
| 29904 | 935600  | 937203  | 1.41E-21 | 0.7  |
| 29904 | 944987  | 945422  | 6.44E-55 | 0.92 |
| 29904 | 951662  | 952313  | 3.73E-19 | 0.7  |
| 29904 | 986690  | 986988  | 5.51E-21 | 0.81 |
| 29904 | 1004600 | 1004845 | 5.32E-29 | 0.91 |
| 29904 | 1014482 | 1015617 | 4.49E-89 | 0.75 |
| 29904 | 1016044 | 1016496 | 2.16E-15 | 0.63 |
| 29904 | 1018622 | 1018903 | 6.65E-33 | 0.94 |
| 29904 | 1021089 | 1021639 | 4.75E-25 | 0.87 |
| 29904 | 1024017 | 1024611 | 1.24E-36 | 0.86 |
| 29904 | 1024950 | 1026251 | 3.62E-67 | 0.89 |
| 29904 | 1041686 | 1042168 | 6.95E-24 | 0.87 |
| 29904 | 1042500 | 1044099 | 6.65E-73 | 0.85 |
| 29904 | 1046240 | 1046580 | 3.50E-15 | 0.89 |
| 29904 | 1063413 | 1063638 | 2.06E-28 | 0.87 |
| 29904 | 1079153 | 1080377 | 2.50E-47 | 0.9  |
| 29904 | 1090116 | 1091395 | 1.18E-26 | 0.76 |
| 29904 | 1095946 | 1096202 | 4.61E-16 | 0.88 |
| 29904 | 1096937 | 1097239 | 2.87E-22 | 0.87 |
| 29904 | 1097449 | 1097997 | 1.56E-22 | 0.81 |
| 29905 | 2644    | 3013    | 2.69E-20 | 0.83 |
| 29905 | 13723   | 14235   | 4.52E-45 | 0.73 |
| 29905 | 17763   | 17991   | 1.39E-10 | 0.87 |
| 29905 | 19481   | 19805   | 1.43E-09 | 1    |
| 29905 | 19963   | 20380   | 9.04E-06 | 0.93 |
| 29905 | 23817   | 25046   | 4.15E-31 | 0.72 |
| 29905 | 67071   | 67961   | 1.58E-68 | 0.72 |
| 29905 | 83788   | 84152   | 4.75E-24 | 0.92 |
| 29905 | 86385   | 87573   | 2.57E-73 | 0.92 |
| 29905 | 89765   | 89989   | 8.27E-10 | 0.87 |
| 29905 | 150897  | 151524  | 2.22E-35 | 0.69 |
| 29905 | 185557  | 186076  | 6.40E-46 | 0.92 |
| 29905 | 243808  | 244031  | 5.26E-25 | 0.92 |

|       |        |        |          |      |
|-------|--------|--------|----------|------|
| 29905 | 252569 | 253289 | 1.54E-24 | 0.66 |
| 29905 | 278360 | 278852 | 1.46E-08 | 0.64 |
| 29905 | 287240 | 287483 | 1.44E-40 | 0.84 |
| 29905 | 295757 | 296277 | 1.86E-37 | 0.84 |
| 29906 | 3971   | 4495   | 8.75E-08 | 0.93 |
| 29906 | 16754  | 17280  | 2.53E-11 | 0.9  |
| 29906 | 22353  | 22790  | 2.23E-18 | 0.76 |
| 29906 | 24169  | 24922  | 1.73E-41 | 0.94 |
| 29906 | 32182  | 32554  | 8.08E-13 | 0.92 |
| 29907 | 32276  | 32929  | 2.61E-17 | 0.78 |
| 29907 | 53980  | 54519  | 5.23E-40 | 0.94 |
| 29907 | 61896  | 62391  | 1.33E-18 | 0.79 |
| 29907 | 67141  | 67487  | 1.20E-32 | 0.86 |
| 29907 | 70928  | 71295  | 9.97E-48 | 0.85 |
| 29907 | 71598  | 72092  | 1.85E-23 | 0.75 |
| 29907 | 72433  | 73038  | 2.55E-43 | 0.68 |
| 29907 | 76607  | 77144  | 2.54E-37 | 0.76 |
| 29907 | 78556  | 79351  | 7.68E-36 | 0.87 |
| 29907 | 81632  | 82164  | 3.25E-27 | 0.64 |
| 29907 | 86136  | 86348  | 1.08E-17 | 0.81 |
| 29907 | 89048  | 89579  | 1.32E-21 | 0.72 |
| 29907 | 96143  | 96497  | 2.94E-13 | 0.8  |
| 29907 | 127301 | 127650 | 1.94E-07 | 0.76 |
| 29907 | 141238 | 141936 | 1.62E-58 | 0.93 |
| 29907 | 147561 | 147885 | 1.15E-13 | 0.69 |
| 29907 | 148173 | 148756 | 9.24E-37 | 0.81 |
| 29907 | 159641 | 160495 | 2.19E-88 | 0.91 |
| 29907 | 164258 | 165192 | 8.62E-83 | 0.95 |
| 29907 | 166256 | 166832 | 9.19E-25 | 0.81 |
| 29907 | 168437 | 169074 | 6.59E-35 | 0.89 |
| 29907 | 191037 | 192259 | 8.87E-37 | 0.74 |
| 29907 | 195576 | 195883 | 2.83E-30 | 0.64 |
| 29907 | 199019 | 199954 | 8.61E-58 | 0.88 |
| 29907 | 205377 | 205825 | 5.79E-10 | 0.79 |
| 29907 | 262236 | 262662 | 1.16E-12 | 0.86 |
| 29907 | 329849 | 330241 | 1.38E-52 | 0.91 |
| 29907 | 342538 | 342808 | 2.55E-24 | 0.77 |
| 29907 | 349434 | 349665 | 1.07E-15 | 0.6  |
| 29907 | 354006 | 354284 | 7.14E-11 | 0.8  |
| 29908 | 59012  | 59722  | 4.35E-16 | 0.84 |
| 29908 | 84028  | 84452  | 8.37E-34 | 0.94 |
| 29908 | 92127  | 93059  | 7.19E-75 | 0.87 |
| 29908 | 93376  | 93738  | 3.53E-13 | 0.7  |
| 29908 | 108421 | 109058 | 9.94E-34 | 0.88 |
| 29908 | 118990 | 119330 | 7.78E-29 | 0.65 |
| 29908 | 119568 | 120454 | 3.62E-56 | 0.86 |
| 29908 | 120738 | 121143 | 1.33E-15 | 0.62 |
| 29908 | 145119 | 145328 | 1.15E-17 | 0.86 |
| 29908 | 151428 | 151854 | 1.05E-15 | 0.89 |
| 29908 | 155792 | 156333 | 2.93E-30 | 0.71 |
| 29908 | 173602 | 173832 | 3.70E-18 | 0.87 |
| 29908 | 215162 | 215816 | 3.78E-31 | 0.79 |
| 29908 | 232658 | 233239 | 1.59E-34 | 0.85 |

|       |        |        |           |      |
|-------|--------|--------|-----------|------|
| 29908 | 252502 | 253583 | 1.66E-48  | 0.83 |
| 29908 | 258776 | 259223 | 5.69E-34  | 0.67 |
| 29908 | 318276 | 319491 | 3.03E-71  | 0.85 |
| 29908 | 324195 | 324417 | 1.67E-20  | 0.87 |
| 29908 | 362215 | 362924 | 1.82E-21  | 0.61 |
| 29908 | 371199 | 371567 | 7.96E-06  | 0.79 |
| 29908 | 384714 | 385026 | 5.85E-13  | 0.83 |
| 29908 | 386174 | 386489 | 2.11E-36  | 0.96 |
| 29908 | 405162 | 407396 | 4.79E-71  | 0.82 |
| 29908 | 409304 | 409726 | 1.68E-23  | 0.93 |
| 29908 | 410762 | 411296 | 5.38E-23  | 0.84 |
| 29908 | 411511 | 411986 | 2.03E-18  | 0.74 |
| 29908 | 420170 | 420544 | 3.19E-29  | 0.82 |
| 29908 | 425033 | 425530 | 8.58E-31  | 0.91 |
| 29908 | 440068 | 440382 | 1.61E-60  | 0.95 |
| 29908 | 441379 | 441863 | 1.31E-49  | 0.81 |
| 29908 | 442075 | 442561 | 2.57E-60  | 0.96 |
| 29908 | 482307 | 482614 | 5.79E-31  | 0.74 |
| 29908 | 484268 | 484691 | 2.40E-10  | 0.82 |
| 29908 | 495032 | 495393 | 1.90E-39  | 0.95 |
| 29908 | 517833 | 518112 | 1.56E-11  | 0.78 |
| 29908 | 534628 | 535635 | 1.02E-60  | 0.72 |
| 29908 | 601828 | 602512 | 1.11E-23  | 0.67 |
| 29908 | 603260 | 605151 | 6.20E-81  | 0.76 |
| 29908 | 615292 | 616011 | 1.44E-71  | 0.91 |
| 29908 | 616592 | 616962 | 3.86E-23  | 0.91 |
| 29908 | 617229 | 617691 | 1.58E-19  | 0.72 |
| 29908 | 632995 | 633652 | 4.89E-19  | 0.76 |
| 29908 | 634169 | 635664 | 2.04E-42  | 0.78 |
| 29908 | 640133 | 640385 | 1.69E-09  | 0.83 |
| 29908 | 640685 | 641251 | 4.45E-20  | 0.77 |
| 29908 | 650006 | 650450 | 7.82E-29  | 0.8  |
| 29908 | 650291 | 650545 | 5.90E-22  | 0.78 |
| 29908 | 654555 | 654940 | 8.07E-15  | 0.85 |
| 29908 | 671244 | 673235 | 2.60E-113 | 0.86 |
| 29908 | 700882 | 701522 | 9.94E-18  | 0.71 |
| 29908 | 746066 | 746768 | 5.97E-48  | 0.88 |
| 29908 | 755286 | 755786 | 3.55E-24  | 0.74 |
| 29908 | 760289 | 760495 | 4.36E-13  | 0.77 |
| 29908 | 764998 | 765275 | 2.23E-32  | 0.9  |
| 29908 | 765539 | 766163 | 6.96E-38  | 0.88 |
| 29908 | 785011 | 785700 | 5.54E-26  | 0.75 |
| 29908 | 791228 | 791732 | 7.49E-23  | 0.77 |
| 29908 | 794850 | 795216 | 1.07E-08  | 0.72 |
| 29908 | 806314 | 806879 | 1.40E-36  | 0.83 |
| 29908 | 807097 | 807492 | 1.88E-28  | 0.82 |
| 29908 | 834697 | 835656 | 1.06E-26  | 0.76 |
| 29908 | 835904 | 836460 | 1.31E-22  | 0.91 |
| 29908 | 852554 | 853291 | 2.09E-50  | 0.75 |
| 29908 | 873376 | 873861 | 7.17E-07  | 0.88 |
| 29908 | 877045 | 877282 | 3.62E-23  | 0.69 |
| 29908 | 898748 | 899098 | 1.87E-17  | 0.79 |
| 29908 | 899469 | 899927 | 3.70E-12  | 0.81 |

|       |         |         |          |      |
|-------|---------|---------|----------|------|
| 29908 | 901131  | 901795  | 6.62E-41 | 0.84 |
| 29908 | 902221  | 902906  | 1.41E-25 | 0.8  |
| 29908 | 904793  | 906106  | 9.75E-50 | 0.8  |
| 29908 | 941446  | 942366  | 1.48E-90 | 0.74 |
| 29908 | 942574  | 943088  | 2.56E-40 | 0.81 |
| 29908 | 956743  | 957622  | 1.85E-42 | 0.81 |
| 29908 | 968835  | 969290  | 3.69E-19 | 0.68 |
| 29908 | 1013112 | 1014241 | 5.74E-54 | 0.8  |
| 29908 | 1063532 | 1063805 | 2.25E-15 | 0.79 |
| 29908 | 1126244 | 1127013 | 4.28E-93 | 0.82 |
| 29908 | 1131748 | 1132281 | 1.49E-13 | 0.67 |
| 29908 | 1132513 | 1133118 | 7.78E-21 | 0.7  |
| 29908 | 1188779 | 1189241 | 3.51E-09 | 0.87 |
| 29908 | 1196776 | 1197140 | 3.91E-36 | 0.9  |
| 29908 | 1197382 | 1198392 | 5.76E-87 | 0.85 |
| 29908 | 1198656 | 1199302 | 6.77E-55 | 0.82 |
| 29908 | 1243619 | 1243915 | 1.55E-33 | 0.89 |
| 29908 | 1256433 | 1256780 | 1.20E-33 | 0.9  |
| 29908 | 1260676 | 1261223 | 8.60E-39 | 0.89 |
| 29908 | 1266761 | 1267185 | 2.12E-28 | 0.81 |
| 29908 | 1269002 | 1269614 | 5.35E-65 | 0.93 |
| 29908 | 1269815 | 1270175 | 4.08E-30 | 0.86 |
| 29908 | 1278459 | 1279273 | 5.19E-52 | 0.79 |
| 29908 | 1292885 | 1293841 | 8.30E-45 | 0.81 |
| 29908 | 1294203 | 1296122 | 8.61E-84 | 0.73 |
| 29908 | 1356359 | 1356933 | 1.41E-09 | 0.6  |
| 29908 | 1370619 | 1371665 | 3.00E-87 | 0.92 |
| 29908 | 1373825 | 1374047 | 2.33E-13 | 0.86 |
| 29908 | 1387965 | 1388208 | 7.45E-18 | 0.74 |
| 29908 | 1388409 | 1388682 | 4.16E-38 | 0.93 |
| 29908 | 1388913 | 1389211 | 9.77E-29 | 0.86 |
| 29908 | 1419010 | 1419535 | 1.06E-13 | 0.77 |
| 29908 | 1470119 | 1471848 | 9.85E-83 | 0.75 |
| 29908 | 1473941 | 1475109 | 1.03E-76 | 0.88 |
| 29908 | 1475372 | 1476645 | 1.72E-51 | 0.79 |
| 29908 | 1483418 | 1483702 | 8.05E-34 | 0.92 |
| 29908 | 1489264 | 1489561 | 8.65E-08 | 0.71 |
| 29908 | 1491148 | 1492940 | 2.59E-44 | 0.7  |
| 29908 | 1495652 | 1496238 | 4.83E-13 | 0.7  |
| 29908 | 1497110 | 1497354 | 1.11E-11 | 0.9  |
| 29908 | 1508815 | 1509695 | 2.08E-46 | 0.62 |
| 29908 | 1528277 | 1528827 | 1.03E-09 | 0.79 |
| 29908 | 1531895 | 1532370 | 2.69E-28 | 0.81 |
| 29908 | 1539153 | 1539521 | 9.64E-43 | 0.93 |
| 29908 | 1544714 | 1544989 | 7.08E-15 | 0.85 |
| 29908 | 1545949 | 1546333 | 3.25E-16 | 0.77 |
| 29908 | 1557401 | 1557894 | 1.90E-08 | 0.71 |
| 29908 | 1655542 | 1655945 | 1.67E-10 | 0.78 |
| 29908 | 1660691 | 1661260 | 7.28E-18 | 0.73 |
| 29908 | 1666346 | 1667029 | 1.55E-25 | 0.75 |
| 29908 | 1676424 | 1676832 | 1.71E-41 | 0.95 |
| 29908 | 1688742 | 1690522 | 4.04E-57 | 0.79 |
| 29908 | 1698141 | 1699156 | 3.94E-67 | 0.77 |

|       |         |         |           |      |
|-------|---------|---------|-----------|------|
| 29908 | 1718471 | 1719023 | 9.68E-21  | 0.71 |
| 29908 | 1719295 | 1719759 | 2.13E-26  | 0.87 |
| 29908 | 1772080 | 1772582 | 8.57E-23  | 0.6  |
| 29908 | 1800603 | 1801077 | 1.33E-45  | 0.6  |
| 29908 | 1806504 | 1806715 | 1.65E-12  | 0.68 |
| 29908 | 1807237 | 1807925 | 4.50E-16  | 0.67 |
| 29908 | 1814730 | 1815887 | 1.55E-54  | 0.68 |
| 29908 | 1822433 | 1823171 | 1.49E-27  | 0.78 |
| 29908 | 1828255 | 1828635 | 1.86E-18  | 0.75 |
| 29908 | 1849939 | 1850219 | 5.81E-12  | 0.7  |
| 29908 | 1850558 | 1851647 | 8.37E-47  | 0.84 |
| 29908 | 1857705 | 1858375 | 1.95E-22  | 0.81 |
| 29908 | 1875972 | 1876446 | 1.53E-48  | 0.9  |
| 29908 | 1882247 | 1882546 | 1.17E-31  | 0.9  |
| 29908 | 1884217 | 1884436 | 6.31E-30  | 0.94 |
| 29908 | 1885084 | 1885485 | 1.22E-28  | 0.68 |
| 29908 | 1886383 | 1886682 | 7.94E-25  | 0.9  |
| 29908 | 1896184 | 1896397 | 8.24E-23  | 0.88 |
| 29908 | 1909039 | 1909349 | 1.34E-18  | 0.93 |
| 29908 | 1922338 | 1923669 | 2.13E-110 | 0.71 |
| 29908 | 1947794 | 1948114 | 5.11E-17  | 0.82 |
| 29908 | 1955551 | 1956093 | 9.71E-88  | 0.88 |
| 29908 | 1956521 | 1957637 | 1.01E-53  | 0.82 |
| 29908 | 1960788 | 1961053 | 7.57E-30  | 0.91 |
| 29908 | 1962753 | 1963353 | 4.90E-30  | 0.78 |
| 29908 | 1974975 | 1975616 | 1.40E-26  | 0.8  |
| 29908 | 1991530 | 1992648 | 9.23E-27  | 0.74 |
| 29908 | 2001424 | 2002126 | 3.61E-30  | 0.83 |
| 29908 | 2026042 | 2026258 | 2.66E-08  | 0.86 |
| 29908 | 2037987 | 2038249 | 6.41E-23  | 0.84 |
| 29908 | 2038779 | 2039255 | 4.31E-29  | 0.83 |
| 29909 | 30651   | 30911   | 4.84E-16  | 0.83 |
| 29909 | 51171   | 51504   | 7.69E-14  | 0.92 |
| 29909 | 57101   | 57761   | 9.38E-11  | 0.84 |
| 29909 | 59180   | 60236   | 1.43E-27  | 0.65 |
| 29909 | 60993   | 61545   | 6.82E-10  | 0.77 |
| 29909 | 72553   | 73140   | 3.48E-09  | 0.78 |
| 29909 | 75593   | 76035   | 1.53E-07  | 1    |
| 29909 | 174564  | 175134  | 5.16E-11  | 0.72 |
| 29909 | 205049  | 205408  | 5.24E-10  | 0.92 |
| 29909 | 215468  | 215948  | 1.27E-07  | 1    |
| 29909 | 216311  | 216667  | 5.23E-07  | 0.97 |
| 29909 | 228666  | 229153  | 7.40E-09  | 0.82 |
| 29909 | 228689  | 229225  | 2.44E-07  | 0.8  |
| 29909 | 229369  | 229628  | 2.64E-09  | 0.9  |
| 29909 | 239758  | 240023  | 2.07E-15  | 0.81 |
| 29909 | 301577  | 301824  | 3.49E-15  | 0.92 |
| 29909 | 334348  | 334548  | 2.50E-24  | 0.82 |
| 29909 | 344770  | 345262  | 4.57E-07  | 0.79 |
| 29909 | 367431  | 367910  | 8.74E-18  | 0.79 |
| 29909 | 374869  | 376336  | 1.30E-43  | 0.93 |
| 29909 | 377430  | 377906  | 2.09E-11  | 0.81 |
| 29909 | 389835  | 390364  | 3.71E-14  | 0.82 |

|       |        |        |           |      |
|-------|--------|--------|-----------|------|
| 29910 | 7800   | 8535   | 1.29E-93  | 0.81 |
| 29910 | 17853  | 18324  | 2.34E-14  | 0.8  |
| 29910 | 23938  | 24207  | 8.23E-11  | 0.76 |
| 29910 | 35580  | 35988  | 1.71E-18  | 0.83 |
| 29910 | 36795  | 37165  | 2.17E-10  | 0.72 |
| 29910 | 111535 | 112014 | 8.51E-13  | 0.77 |
| 29910 | 128706 | 128994 | 4.65E-10  | 0.93 |
| 29910 | 132201 | 132470 | 2.13E-10  | 0.75 |
| 29910 | 192704 | 193494 | 7.72E-22  | 0.7  |
| 29910 | 213421 | 213799 | 6.32E-42  | 0.9  |
| 29910 | 317617 | 318401 | 5.88E-06  | 0.72 |
| 29910 | 384041 | 384457 | 2.49E-26  | 0.89 |
| 29910 | 388686 | 390567 | 6.12E-106 | 0.81 |
| 29910 | 416213 | 417287 | 1.59E-24  | 0.75 |
| 29910 | 454018 | 454777 | 6.17E-61  | 0.93 |
| 29910 | 489198 | 489470 | 1.81E-30  | 0.69 |
| 29910 | 498347 | 498988 | 3.61E-30  | 0.73 |
| 29910 | 504541 | 505915 | 3.40E-56  | 0.76 |
| 29912 | 6553   | 7544   | 6.41E-116 | 0.85 |
| 29912 | 9820   | 10260  | 4.00E-06  | 0.97 |
| 29912 | 34517  | 34953  | 2.57E-26  | 0.79 |
| 29912 | 34603  | 34995  | 1.89E-24  | 0.8  |
| 29912 | 105638 | 105920 | 1.39E-22  | 0.94 |
| 29912 | 119205 | 119477 | 1.73E-24  | 0.92 |
| 29912 | 146093 | 146298 | 4.75E-12  | 0.98 |
| 29912 | 149901 | 151698 | 2.54E-63  | 0.7  |
| 29912 | 152158 | 152528 | 1.82E-32  | 0.81 |
| 29912 | 163220 | 163918 | 7.15E-26  | 0.81 |
| 29912 | 164979 | 165296 | 4.80E-13  | 0.79 |
| 29912 | 168197 | 168485 | 2.08E-13  | 0.75 |
| 29912 | 171688 | 172748 | 1.22E-52  | 0.88 |
| 29912 | 172949 | 174275 | 1.45E-35  | 0.83 |
| 29912 | 176786 | 177202 | 7.61E-11  | 0.68 |
| 29912 | 196132 | 196912 | 4.49E-43  | 0.64 |
| 29912 | 210738 | 211094 | 1.29E-48  | 0.96 |
| 29912 | 211339 | 211988 | 1.41E-42  | 0.8  |
| 29912 | 221294 | 221720 | 1.66E-17  | 0.65 |
| 29912 | 221932 | 222231 | 6.77E-25  | 0.71 |
| 29912 | 223532 | 223942 | 6.03E-35  | 0.95 |
| 29912 | 230906 | 231285 | 4.05E-30  | 0.88 |
| 29912 | 236534 | 236918 | 5.46E-10  | 0.72 |
| 29912 | 238721 | 239461 | 7.66E-21  | 0.83 |
| 29912 | 335268 | 336080 | 2.75E-100 | 0.78 |
| 29912 | 356177 | 356475 | 1.01E-14  | 0.78 |
| 29912 | 359672 | 360091 | 4.37E-23  | 0.88 |
| 29912 | 363173 | 363667 | 2.30E-41  | 0.8  |
| 29912 | 364371 | 365237 | 3.78E-98  | 0.91 |
| 29912 | 376469 | 376672 | 1.54E-18  | 0.91 |
| 29912 | 390021 | 390544 | 4.53E-22  | 0.84 |
| 29912 | 391262 | 391645 | 1.19E-26  | 0.96 |
| 29912 | 408536 | 408893 | 1.96E-19  | 0.82 |
| 29912 | 409097 | 409691 | 7.09E-61  | 0.91 |
| 29912 | 434821 | 435837 | 6.14E-46  | 0.83 |

|       |         |         |           |      |
|-------|---------|---------|-----------|------|
| 29912 | 436581  | 437550  | 2.30E-41  | 0.89 |
| 29912 | 437765  | 438004  | 5.24E-44  | 0.93 |
| 29912 | 441453  | 442237  | 1.67E-31  | 0.74 |
| 29912 | 442463  | 443080  | 1.86E-26  | 0.89 |
| 29912 | 443342  | 443638  | 5.72E-18  | 0.85 |
| 29912 | 445188  | 446083  | 1.89E-42  | 0.64 |
| 29912 | 467159  | 467608  | 7.50E-16  | 0.78 |
| 29912 | 467812  | 468607  | 1.46E-43  | 0.8  |
| 29912 | 468912  | 469239  | 4.01E-23  | 0.65 |
| 29912 | 506403  | 506992  | 7.93E-19  | 0.84 |
| 29912 | 514062  | 514539  | 1.17E-52  | 0.83 |
| 29912 | 516657  | 518235  | 2.02E-46  | 0.82 |
| 29912 | 535748  | 537606  | 7.13E-94  | 0.83 |
| 29912 | 567225  | 567568  | 3.65E-18  | 0.89 |
| 29912 | 567800  | 568688  | 5.49E-83  | 0.97 |
| 29912 | 569483  | 570395  | 1.17E-57  | 0.9  |
| 29912 | 586091  | 586690  | 1.64E-34  | 0.8  |
| 29912 | 592117  | 592428  | 5.59E-33  | 0.88 |
| 29912 | 617391  | 618079  | 7.88E-42  | 0.84 |
| 29912 | 630478  | 630950  | 4.59E-23  | 0.77 |
| 29912 | 632018  | 632353  | 5.78E-08  | 0.69 |
| 29912 | 645096  | 646651  | 2.77E-81  | 0.86 |
| 29912 | 682324  | 683140  | 7.88E-39  | 0.85 |
| 29912 | 699075  | 699302  | 1.85E-16  | 0.81 |
| 29912 | 702010  | 702913  | 5.67E-43  | 0.9  |
| 29912 | 714050  | 714308  | 1.79E-16  | 0.77 |
| 29912 | 723489  | 724693  | 4.10E-78  | 0.83 |
| 29912 | 746047  | 747205  | 8.42E-60  | 0.7  |
| 29912 | 774378  | 774591  | 9.60E-25  | 0.66 |
| 29912 | 800022  | 800397  | 1.43E-36  | 0.92 |
| 29912 | 800841  | 801595  | 2.32E-43  | 0.87 |
| 29912 | 802154  | 802544  | 6.47E-34  | 0.88 |
| 29912 | 802787  | 804712  | 1.70E-70  | 0.81 |
| 29912 | 816201  | 818926  | 3.70E-105 | 0.72 |
| 29912 | 829680  | 831073  | 9.70E-46  | 0.77 |
| 29912 | 848890  | 849314  | 6.06E-23  | 0.86 |
| 29912 | 854380  | 855329  | 3.65E-24  | 0.66 |
| 29912 | 885175  | 885680  | 7.52E-34  | 0.77 |
| 29912 | 917181  | 918502  | 8.14E-93  | 0.74 |
| 29912 | 932530  | 933241  | 4.62E-52  | 0.88 |
| 29912 | 948565  | 948772  | 8.63E-20  | 0.77 |
| 29912 | 976484  | 976822  | 2.71E-16  | 0.79 |
| 29912 | 977431  | 977894  | 7.78E-23  | 0.79 |
| 29912 | 978132  | 978934  | 1.54E-28  | 0.65 |
| 29912 | 984042  | 984476  | 2.11E-20  | 0.8  |
| 29912 | 988487  | 988705  | 2.30E-15  | 0.78 |
| 29912 | 991087  | 991651  | 3.71E-26  | 0.84 |
| 29912 | 1009510 | 1010174 | 1.60E-28  | 0.77 |
| 29912 | 1020739 | 1021385 | 1.40E-32  | 0.84 |
| 29912 | 1028969 | 1029324 | 9.76E-22  | 0.64 |
| 29912 | 1083236 | 1083453 | 1.61E-68  | 0.89 |
| 29912 | 1196557 | 1196852 | 3.30E-35  | 0.88 |
| 29912 | 1197401 | 1197637 | 9.69E-09  | 0.79 |



|       |         |         |           |      |
|-------|---------|---------|-----------|------|
| 29912 | 1242059 | 1242609 | 3.42E-26  | 0.89 |
| 29912 | 1242876 | 1243653 | 1.50E-27  | 0.87 |
| 29912 | 1243906 | 1244361 | 2.06E-28  | 0.87 |
| 29912 | 1248641 | 1249043 | 2.79E-26  | 0.64 |
| 29912 | 1249865 | 1250087 | 1.02E-53  | 0.87 |
| 29912 | 1253603 | 1254570 | 1.08E-40  | 0.68 |
| 29912 | 1260435 | 1260752 | 3.26E-21  | 0.85 |
| 29912 | 1270317 | 1271109 | 1.29E-62  | 0.8  |
| 29912 | 1280646 | 1281398 | 3.96E-28  | 0.86 |
| 29912 | 1287079 | 1287330 | 1.62E-32  | 0.93 |
| 29912 | 1294657 | 1295241 | 2.07E-109 | 0.92 |
| 29912 | 1295786 | 1296477 | 1.10E-32  | 0.63 |
| 29912 | 1306858 | 1307674 | 2.86E-43  | 0.82 |
| 29912 | 1336979 | 1337571 | 1.24E-14  | 0.79 |
| 29912 | 1349109 | 1349716 | 4.54E-37  | 0.79 |
| 29912 | 1349980 | 1350603 | 1.56E-32  | 0.9  |
| 29912 | 1366679 | 1367738 | 5.99E-58  | 0.85 |
| 29912 | 1368424 | 1370183 | 2.23E-87  | 0.81 |
| 29912 | 1437433 | 1438077 | 1.13E-54  | 0.86 |
| 29912 | 1438309 | 1438819 | 4.05E-49  | 0.85 |
| 29912 | 1439065 | 1439474 | 1.00E-34  | 0.86 |
| 29912 | 1444969 | 1445342 | 6.26E-19  | 0.88 |
| 29912 | 1447901 | 1448217 | 5.48E-26  | 0.78 |
| 29912 | 1455760 | 1456068 | 9.90E-28  | 0.92 |
| 29912 | 1457657 | 1458004 | 9.44E-36  | 0.89 |
| 29912 | 1462112 | 1462767 | 5.16E-55  | 0.87 |
| 29912 | 1462999 | 1463387 | 5.26E-26  | 0.87 |
| 29912 | 1464521 | 1466164 | 1.77E-118 | 0.86 |
| 29912 | 1480846 | 1481643 | 7.03E-48  | 0.68 |
| 29912 | 1505590 | 1507164 | 8.26E-65  | 0.71 |
| 29912 | 1515244 | 1515460 | 1.28E-34  | 0.95 |
| 29912 | 1528109 | 1529287 | 3.59E-61  | 0.84 |
| 29912 | 1548702 | 1548997 | 1.78E-43  | 0.9  |
| 29912 | 1549389 | 1549743 | 8.67E-26  | 0.95 |
| 29912 | 1549984 | 1550452 | 2.61E-82  | 0.93 |
| 29912 | 1555498 | 1555917 | 2.94E-30  | 0.85 |
| 29912 | 1559504 | 1560785 | 5.62E-95  | 0.72 |
| 29912 | 1569527 | 1570627 | 6.12E-57  | 0.7  |
| 29912 | 1622284 | 1622541 | 5.18E-10  | 0.73 |
| 29912 | 1647304 | 1647874 | 6.83E-28  | 0.84 |
| 29912 | 1666299 | 1666535 | 1.33E-13  | 0.81 |
| 29912 | 1686492 | 1686987 | 1.12E-09  | 0.82 |
| 29912 | 1708785 | 1709265 | 5.93E-33  | 0.84 |
| 29912 | 1749714 | 1750083 | 2.91E-80  | 0.92 |
| 29912 | 1752401 | 1753576 | 5.67E-56  | 0.93 |
| 29912 | 1753878 | 1755770 | 4.07E-133 | 0.85 |
| 29912 | 1759571 | 1760164 | 1.36E-47  | 0.78 |
| 29912 | 1761802 | 1762993 | 7.19E-52  | 0.76 |
| 29912 | 1841372 | 1842267 | 1.00E-32  | 0.62 |
| 29912 | 1883076 | 1883899 | 1.87E-62  | 0.8  |
| 29912 | 1958722 | 1959164 | 1.57E-23  | 0.72 |
| 29912 | 1960145 | 1960698 | 1.45E-22  | 0.88 |
| 29912 | 1960911 | 1961606 | 3.30E-44  | 0.9  |

|       |         |         |           |      |
|-------|---------|---------|-----------|------|
| 29912 | 1961823 | 1962797 | 2.79E-29  | 0.8  |
| 29912 | 1976265 | 1976845 | 5.88E-24  | 0.73 |
| 29912 | 1977197 | 1978243 | 2.28E-129 | 0.88 |
| 29913 | 17575   | 18488   | 7.97E-32  | 0.85 |
| 29913 | 19862   | 20143   | 4.73E-08  | 0.78 |
| 29913 | 24585   | 26468   | 9.56E-74  | 0.77 |
| 29913 | 41545   | 41756   | 3.21E-11  | 0.71 |
| 29913 | 63406   | 63649   | 4.98E-07  | 0.86 |
| 29914 | 46451   | 46953   | 1.72E-29  | 0.75 |
| 29914 | 47162   | 47489   | 2.08E-09  | 0.79 |
| 29914 | 116708  | 117214  | 4.29E-47  | 0.96 |
| 29914 | 118509  | 118915  | 1.47E-25  | 0.97 |
| 29914 | 133239  | 133682  | 3.74E-41  | 0.95 |
| 29914 | 145449  | 145976  | 4.10E-27  | 0.85 |
| 29914 | 146675  | 146978  | 6.10E-12  | 0.75 |
| 29914 | 148399  | 148632  | 1.27E-34  | 0.89 |
| 29915 | 15322   | 15688   | 3.80E-09  | 0.81 |
| 29915 | 59611   | 60365   | 3.27E-80  | 0.73 |
| 29915 | 60650   | 62473   | 2.23E-108 | 0.64 |
| 29915 | 63982   | 64369   | 1.94E-53  | 0.62 |
| 29915 | 70318   | 71330   | 2.43E-61  | 0.85 |
| 29915 | 77249   | 77689   | 5.13E-13  | 0.7  |
| 29915 | 97409   | 97887   | 3.78E-24  | 0.79 |
| 29915 | 107527  | 108018  | 2.88E-50  | 0.95 |
| 29915 | 116721  | 118050  | 8.93E-50  | 0.87 |
| 29915 | 118290  | 118671  | 8.35E-16  | 0.72 |
| 29915 | 119032  | 119306  | 4.13E-38  | 0.92 |
| 29915 | 119989  | 120537  | 3.62E-46  | 0.83 |
| 29915 | 128496  | 128889  | 1.49E-25  | 0.6  |
| 29915 | 145643  | 145917  | 7.47E-09  | 0.77 |
| 29915 | 151658  | 151928  | 5.09E-15  | 0.8  |
| 29915 | 153263  | 154133  | 8.20E-62  | 0.93 |
| 29915 | 154520  | 155712  | 3.26E-83  | 0.9  |
| 29915 | 185218  | 186145  | 1.44E-55  | 0.65 |
| 29915 | 220641  | 221567  | 1.63E-34  | 0.71 |
| 29915 | 247337  | 247663  | 4.92E-31  | 0.74 |
| 29916 | 52131   | 52804   | 4.72E-41  | 0.88 |
| 29916 | 53015   | 53755   | 1.16E-42  | 0.85 |
| 29916 | 68212   | 68829   | 8.17E-29  | 0.84 |
| 29916 | 95942   | 96596   | 8.18E-19  | 0.83 |
| 29916 | 110650  | 111125  | 9.49E-32  | 0.94 |
| 29916 | 111498  | 111753  | 4.80E-23  | 0.91 |
| 29916 | 112742  | 112959  | 9.96E-29  | 0.92 |
| 29916 | 119561  | 120309  | 1.62E-21  | 0.86 |
| 29916 | 161264  | 162051  | 7.84E-17  | 0.73 |
| 29916 | 163612  | 164114  | 3.67E-21  | 0.78 |
| 29916 | 185233  | 185481  | 3.73E-13  | 0.61 |
| 29916 | 215970  | 216335  | 7.13E-25  | 0.78 |
| 29916 | 216538  | 217058  | 1.01E-51  | 0.94 |
| 29916 | 217297  | 217794  | 1.96E-39  | 0.88 |
| 29917 | 3195    | 3442    | 1.63E-14  | 0.88 |
| 29917 | 32068   | 32421   | 1.10E-35  | 0.89 |
| 29917 | 32734   | 33191   | 5.48E-13  | 0.64 |

|       |        |        |           |      |
|-------|--------|--------|-----------|------|
| 29917 | 33494  | 34063  | 7.39E-28  | 0.91 |
| 29917 | 34423  | 37185  | 2.19E-97  | 0.81 |
| 29917 | 59712  | 59934  | 1.09E-08  | 0.8  |
| 29917 | 102174 | 102838 | 7.16E-29  | 0.7  |
| 29917 | 103175 | 103602 | 1.93E-54  | 0.98 |
| 29917 | 108016 | 108957 | 2.23E-100 | 0.82 |
| 29917 | 123698 | 124219 | 5.39E-16  | 0.79 |
| 29917 | 165413 | 165709 | 4.23E-19  | 0.82 |
| 29917 | 211109 | 212090 | 6.72E-37  | 0.83 |
| 29917 | 212850 | 213851 | 4.68E-56  | 0.89 |
| 29917 | 224777 | 225296 | 2.35E-54  | 0.91 |
| 29917 | 265123 | 265831 | 1.43E-37  | 0.87 |
| 29917 | 266078 | 266584 | 4.34E-37  | 0.71 |
| 29917 | 286489 | 287654 | 3.67E-50  | 0.65 |
| 29917 | 287901 | 288188 | 6.94E-24  | 0.84 |
| 29917 | 290053 | 291428 | 2.25E-78  | 0.79 |
| 29917 | 300276 | 301264 | 1.41E-51  | 0.78 |
| 29917 | 301490 | 302272 | 2.37E-38  | 0.75 |
| 29917 | 303316 | 304061 | 5.83E-55  | 0.9  |
| 29917 | 304473 | 305408 | 6.60E-91  | 0.91 |
| 29917 | 306027 | 306797 | 2.10E-42  | 0.78 |
| 29917 | 321406 | 322140 | 1.63E-71  | 0.85 |
| 29917 | 327471 | 328244 | 6.48E-37  | 0.82 |
| 29917 | 328664 | 329787 | 6.08E-60  | 0.87 |
| 29917 | 356777 | 357404 | 7.38E-15  | 0.77 |
| 29917 | 370322 | 370585 | 7.55E-28  | 0.84 |
| 29917 | 370937 | 371902 | 1.18E-51  | 0.86 |
| 29917 | 389538 | 390627 | 1.30E-48  | 0.72 |
| 29917 | 394612 | 395361 | 1.46E-44  | 0.89 |
| 29917 | 414697 | 414995 | 4.34E-21  | 0.83 |
| 29917 | 426412 | 427454 | 9.34E-28  | 0.86 |
| 29917 | 434033 | 435034 | 7.55E-48  | 0.93 |
| 29917 | 439594 | 439931 | 1.32E-26  | 0.79 |
| 29917 | 445638 | 446317 | 9.04E-44  | 0.92 |
| 29917 | 446576 | 447375 | 4.24E-42  | 0.75 |
| 29917 | 487507 | 487972 | 2.35E-52  | 0.92 |
| 29917 | 505001 | 505405 | 4.80E-40  | 0.89 |
| 29917 | 514614 | 515138 | 9.53E-11  | 0.8  |
| 29917 | 518396 | 518687 | 5.83E-40  | 0.93 |
| 29917 | 518948 | 520856 | 6.11E-148 | 0.76 |
| 29917 | 533571 | 535248 | 1.42E-88  | 0.64 |
| 29917 | 536274 | 536740 | 9.17E-31  | 0.82 |
| 29917 | 538355 | 539343 | 1.08E-21  | 0.67 |
| 29917 | 561510 | 561918 | 5.66E-18  | 0.84 |
| 29917 | 562482 | 562721 | 2.04E-25  | 0.97 |
| 29917 | 597294 | 597893 | 4.52E-66  | 0.72 |
| 29917 | 599275 | 600074 | 1.13E-36  | 0.63 |
| 29917 | 613020 | 613475 | 4.73E-36  | 0.82 |
| 29917 | 613745 | 614377 | 4.75E-49  | 0.9  |
| 29917 | 627437 | 627722 | 8.33E-07  | 0.61 |
| 29917 | 636385 | 636797 | 9.98E-15  | 0.82 |
| 29917 | 636435 | 636979 | 5.34E-18  | 0.8  |
| 29917 | 639965 | 641141 | 2.49E-49  | 0.83 |

|       |        |        |           |      |
|-------|--------|--------|-----------|------|
| 29917 | 644818 | 645737 | 2.01E-32  | 0.65 |
| 29917 | 652215 | 652485 | 5.36E-11  | 0.67 |
| 29917 | 666426 | 666927 | 2.87E-75  | 0.92 |
| 29917 | 667591 | 668244 | 3.99E-49  | 0.89 |
| 29917 | 668530 | 669267 | 6.51E-100 | 0.9  |
| 29917 | 679555 | 679896 | 1.61E-22  | 0.78 |
| 29917 | 685067 | 685517 | 9.67E-23  | 0.81 |
| 29917 | 685862 | 687309 | 1.41E-73  | 0.86 |
| 29917 | 692561 | 692776 | 3.58E-07  | 0.66 |
| 29920 | 12541  | 13065  | 9.51E-41  | 0.95 |
| 29920 | 23913  | 24256  | 6.03E-08  | 0.8  |
| 29920 | 31708  | 31937  | 2.13E-18  | 0.89 |
| 29920 | 37252  | 38412  | 1.79E-95  | 0.91 |
| 29920 | 43739  | 44115  | 1.83E-11  | 0.9  |
| 29922 | 16672  | 16929  | 1.72E-25  | 0.87 |
| 29922 | 43081  | 43444  | 9.72E-16  | 0.82 |
| 29922 | 43656  | 43880  | 3.36E-21  | 0.92 |
| 29922 | 59054  | 59353  | 1.47E-07  | 0.8  |
| 29922 | 88790  | 89123  | 2.90E-04  | 0.97 |
| 29922 | 103816 | 104260 | 2.30E-04  | 0.9  |
| 29922 | 183549 | 183872 | 4.25E-46  | 0.98 |
| 29923 | 17844  | 18380  | 5.03E-12  | 0.82 |
| 29923 | 18852  | 19503  | 4.28E-22  | 0.79 |
| 29923 | 33220  | 33546  | 1.62E-05  | 0.71 |
| 29923 | 36449  | 36655  | 1.27E-10  | 0.81 |
| 29923 | 47584  | 47844  | 2.15E-11  | 0.8  |
| 29923 | 51419  | 51687  | 3.61E-17  | 0.8  |
| 29923 | 62459  | 63437  | 1.68E-31  | 0.8  |
| 29923 | 64178  | 64986  | 3.81E-17  | 0.76 |
| 29923 | 65064  | 65642  | 3.17E-23  | 0.79 |
| 29923 | 71904  | 72256  | 3.84E-18  | 0.79 |
| 29923 | 97257  | 97645  | 9.56E-10  | 0.82 |
| 29923 | 118498 | 118828 | 2.87E-35  | 0.94 |
| 29923 | 119801 | 120498 | 6.35E-13  | 0.83 |
| 29923 | 145663 | 145959 | 1.35E-09  | 0.72 |
| 29923 | 156516 | 156998 | 1.22E-10  | 0.82 |
| 29923 | 162378 | 163073 | 8.96E-36  | 0.85 |
| 29923 | 164229 | 165682 | 1.27E-113 | 0.93 |
| 29923 | 184695 | 185063 | 1.51E-47  | 0.88 |
| 29923 | 185425 | 186033 | 2.27E-11  | 0.7  |
| 29923 | 213141 | 214505 | 6.72E-120 | 0.87 |
| 29923 | 216943 | 217291 | 6.42E-14  | 0.67 |
| 29923 | 224581 | 225596 | 1.05E-44  | 0.94 |
| 29923 | 247383 | 247832 | 6.97E-08  | 0.83 |
| 29923 | 259977 | 260705 | 8.65E-52  | 0.87 |
| 29923 | 277084 | 277489 | 7.52E-18  | 0.77 |
| 29923 | 288217 | 288719 | 4.82E-54  | 0.82 |
| 29923 | 304745 | 305003 | 3.73E-12  | 0.92 |
| 29923 | 305955 | 306412 | 4.50E-33  | 0.94 |
| 29923 | 306705 | 307355 | 1.98E-33  | 0.89 |
| 29923 | 338661 | 339307 | 2.58E-30  | 0.89 |
| 29923 | 340070 | 340823 | 1.43E-41  | 0.87 |
| 29923 | 342739 | 343404 | 1.45E-50  | 0.89 |

|       |        |        |          |      |
|-------|--------|--------|----------|------|
| 29923 | 348395 | 348626 | 2.19E-17 | 0.82 |
| 29923 | 390657 | 391127 | 7.26E-41 | 0.95 |
| 29923 | 391512 | 391846 | 5.37E-53 | 0.94 |
| 29923 | 401258 | 402271 | 5.08E-46 | 0.78 |
| 29923 | 402544 | 402994 | 1.38E-39 | 0.84 |
| 29923 | 407792 | 408013 | 2.83E-13 | 0.81 |
| 29923 | 408105 | 408441 | 9.06E-22 | 0.91 |
| 29923 | 408800 | 409047 | 1.54E-13 | 0.75 |
| 29923 | 412842 | 413142 | 1.07E-15 | 0.87 |
| 29923 | 447175 | 447443 | 2.31E-52 | 0.95 |
| 29923 | 448390 | 448937 | 9.10E-43 | 0.94 |
| 29923 | 449234 | 449731 | 3.80E-31 | 0.84 |
| 29923 | 450446 | 450865 | 8.95E-08 | 0.92 |
| 29923 | 461582 | 462212 | 1.84E-13 | 0.81 |
| 29924 | 7801   | 8726   | 5.69E-22 | 0.61 |
| 29924 | 49636  | 50640  | 1.28E-75 | 0.82 |
| 29924 | 52327  | 53090  | 2.92E-57 | 0.89 |
| 29924 | 53778  | 54263  | 1.19E-47 | 0.94 |
| 29924 | 54557  | 55730  | 7.91E-21 | 0.66 |
| 29924 | 61028  | 61394  | 6.63E-14 | 0.98 |
| 29924 | 62241  | 62594  | 2.96E-13 | 0.67 |
| 29927 | 9970   | 10284  | 5.63E-12 | 0.67 |
| 29927 | 42500  | 43038  | 2.73E-38 | 0.97 |
| 29927 | 81555  | 82420  | 2.59E-76 | 0.93 |
| 29927 | 82946  | 83354  | 3.64E-50 | 0.91 |
| 29927 | 83596  | 83950  | 3.82E-37 | 0.89 |
| 29927 | 85377  | 86001  | 4.41E-37 | 0.86 |
| 29927 | 86718  | 86946  | 2.11E-16 | 0.82 |
| 29927 | 87452  | 87727  | 7.63E-24 | 0.96 |
| 29927 | 87930  | 88179  | 1.71E-16 | 0.89 |
| 29927 | 88410  | 89742  | 2.23E-58 | 0.81 |
| 29927 | 118917 | 120366 | 7.61E-85 | 0.74 |
| 29927 | 130843 | 131382 | 2.28E-81 | 0.83 |
| 29927 | 131602 | 131977 | 2.35E-38 | 0.81 |
| 29927 | 132232 | 132558 | 2.41E-27 | 0.97 |
| 29927 | 132833 | 133530 | 2.40E-45 | 0.84 |
| 29927 | 134204 | 134582 | 4.87E-31 | 0.94 |
| 29927 | 135969 | 136535 | 1.91E-17 | 0.76 |
| 29927 | 143441 | 143718 | 2.68E-23 | 0.87 |
| 29927 | 144027 | 144445 | 9.52E-17 | 0.86 |
| 29927 | 177472 | 178645 | 6.79E-52 | 0.88 |
| 29927 | 182512 | 183088 | 1.72E-18 | 0.85 |
| 29927 | 198823 | 199103 | 7.39E-12 | 0.94 |
| 29927 | 263985 | 264288 | 1.50E-13 | 0.82 |
| 29927 | 304196 | 306590 | 1.26E-89 | 0.8  |
| 29927 | 306908 | 307421 | 4.21E-38 | 0.87 |
| 29927 | 318924 | 319880 | 1.66E-56 | 0.83 |
| 29927 | 320386 | 320599 | 7.36E-30 | 0.88 |
| 29929 | 10415  | 10934  | 9.65E-58 | 0.86 |
| 29929 | 12073  | 12710  | 2.50E-20 | 0.8  |
| 29929 | 13779  | 14375  | 8.62E-55 | 0.91 |
| 29929 | 14607  | 14807  | 1.60E-28 | 0.78 |
| 29929 | 36297  | 37893  | 1.28E-34 | 0.73 |

|       |        |        |          |      |
|-------|--------|--------|----------|------|
| 29929 | 39409  | 39850  | 5.30E-44 | 0.87 |
| 29929 | 42304  | 44235  | 5.08E-73 | 0.77 |
| 29929 | 50988  | 51491  | 5.94E-49 | 0.94 |
| 29929 | 52315  | 53031  | 1.18E-65 | 0.94 |
| 29929 | 66947  | 69023  | 2.87E-86 | 0.78 |
| 29929 | 71759  | 72016  | 7.06E-06 | 1    |
| 29929 | 79885  | 81475  | 1.78E-58 | 0.87 |
| 29929 | 81676  | 82255  | 5.41E-15 | 0.67 |
| 29929 | 90163  | 91281  | 2.76E-32 | 0.89 |
| 29929 | 100194 | 100549 | 3.10E-22 | 0.85 |
| 29929 | 109601 | 110110 | 8.71E-35 | 0.9  |
| 29929 | 114204 | 114550 | 1.12E-15 | 0.69 |
| 29929 | 114850 | 115189 | 7.31E-28 | 0.9  |
| 29929 | 127147 | 127447 | 1.17E-27 | 0.86 |
| 29929 | 136978 | 139295 | 6.81E-90 | 0.84 |
| 29929 | 143231 | 143485 | 9.21E-11 | 0.83 |
| 29929 | 181137 | 181378 | 7.59E-39 | 0.93 |
| 29929 | 200588 | 201308 | 1.73E-25 | 0.82 |
| 29929 | 203000 | 203702 | 2.10E-53 | 0.95 |
| 29929 | 204830 | 205091 | 4.30E-24 | 0.76 |
| 29929 | 214886 | 215319 | 1.18E-15 | 0.8  |
| 29929 | 219122 | 219516 | 8.27E-30 | 0.87 |
| 29929 | 221421 | 222469 | 1.15E-40 | 0.74 |
| 29929 | 248805 | 250066 | 7.62E-46 | 0.76 |
| 29929 | 254158 | 254533 | 1.03E-17 | 0.82 |
| 29929 | 280362 | 280948 | 3.25E-17 | 0.81 |
| 29929 | 284700 | 285110 | 2.10E-17 | 0.82 |
| 29929 | 308372 | 308831 | 5.30E-19 | 0.94 |
| 29929 | 323044 | 323395 | 2.00E-41 | 0.91 |
| 29929 | 325604 | 326129 | 1.85E-16 | 0.83 |
| 29929 | 350670 | 351166 | 7.66E-40 | 0.88 |
| 29929 | 376623 | 378065 | 6.01E-47 | 0.73 |
| 29929 | 381886 | 382476 | 5.52E-28 | 0.81 |
| 29929 | 383941 | 384675 | 1.11E-66 | 0.69 |
| 29929 | 395047 | 395594 | 9.10E-33 | 0.82 |
| 29929 | 396573 | 397329 | 4.34E-58 | 0.92 |
| 29929 | 403233 | 403472 | 2.04E-08 | 0.94 |
| 29929 | 466315 | 467150 | 3.06E-34 | 0.82 |
| 29929 | 467892 | 468347 | 4.06E-36 | 0.9  |
| 29929 | 468555 | 469482 | 2.20E-36 | 0.83 |
| 29929 | 483780 | 484372 | 5.28E-25 | 0.79 |
| 29929 | 524378 | 524801 | 1.17E-12 | 0.84 |
| 29929 | 527547 | 527788 | 2.08E-16 | 0.63 |
| 29929 | 532559 | 532840 | 7.22E-30 | 0.92 |
| 29929 | 534984 | 535624 | 7.08E-19 | 0.7  |
| 29929 | 605706 | 606491 | 4.32E-37 | 0.73 |
| 29929 | 617171 | 617780 | 1.37E-31 | 0.82 |
| 29929 | 618101 | 618761 | 3.54E-39 | 0.75 |
| 29929 | 620019 | 621190 | 9.30E-62 | 0.8  |
| 29929 | 630768 | 631379 | 3.19E-28 | 0.66 |
| 29929 | 635925 | 636689 | 6.82E-52 | 0.78 |
| 29929 | 651030 | 651493 | 2.84E-24 | 0.75 |
| 29929 | 651807 | 652566 | 2.97E-29 | 0.8  |

|       |         |         |          |      |
|-------|---------|---------|----------|------|
| 29929 | 671256  | 671789  | 3.33E-35 | 0.88 |
| 29929 | 689110  | 689630  | 3.63E-25 | 0.82 |
| 29929 | 697750  | 698420  | 3.58E-21 | 0.79 |
| 29929 | 737630  | 737956  | 6.56E-12 | 0.81 |
| 29929 | 750148  | 750408  | 3.68E-28 | 0.83 |
| 29929 | 774856  | 775943  | 4.64E-23 | 0.77 |
| 29929 | 799910  | 800287  | 7.37E-28 | 0.86 |
| 29929 | 802712  | 802932  | 5.17E-16 | 0.8  |
| 29929 | 811341  | 812400  | 4.86E-81 | 0.86 |
| 29929 | 814761  | 814988  | 7.82E-25 | 0.83 |
| 29929 | 858609  | 859325  | 1.67E-32 | 0.8  |
| 29929 | 859583  | 860946  | 8.04E-72 | 0.85 |
| 29929 | 884463  | 884944  | 1.97E-18 | 0.84 |
| 29929 | 885556  | 886348  | 8.01E-66 | 0.62 |
| 29929 | 894661  | 895176  | 3.68E-59 | 0.91 |
| 29929 | 903045  | 903323  | 8.23E-13 | 0.83 |
| 29929 | 943977  | 944302  | 9.34E-20 | 0.77 |
| 29929 | 944612  | 945150  | 3.80E-31 | 0.76 |
| 29929 | 950092  | 950870  | 4.01E-78 | 0.81 |
| 29929 | 951444  | 952101  | 5.92E-82 | 0.89 |
| 29929 | 952306  | 952677  | 3.55E-35 | 0.96 |
| 29929 | 952990  | 953475  | 8.23E-13 | 0.64 |
| 29929 | 1012373 | 1012907 | 8.68E-23 | 0.78 |
| 29929 | 1032836 | 1033798 | 1.46E-69 | 0.84 |
| 29929 | 1040865 | 1041591 | 4.84E-26 | 0.81 |
| 29929 | 1077694 | 1078130 | 1.23E-11 | 0.65 |
| 29929 | 1094519 | 1094839 | 4.82E-44 | 0.78 |
| 29929 | 1095676 | 1096427 | 1.99E-52 | 0.74 |
| 29929 | 1097392 | 1097707 | 3.17E-11 | 0.8  |
| 29929 | 1107708 | 1108767 | 1.57E-36 | 0.73 |
| 29929 | 1135278 | 1136594 | 2.60E-35 | 0.61 |
| 29929 | 1137438 | 1137745 | 1.86E-29 | 0.85 |
| 29929 | 1138004 | 1138872 | 4.27E-53 | 0.89 |
| 29929 | 1139662 | 1139944 | 2.21E-42 | 0.69 |
| 29929 | 1145744 | 1146494 | 1.12E-44 | 0.81 |
| 29929 | 1157982 | 1158367 | 1.24E-17 | 0.79 |
| 29929 | 1165251 | 1165664 | 1.03E-68 | 0.8  |
| 29929 | 1168100 | 1168475 | 3.62E-58 | 0.89 |
| 29929 | 1169581 | 1169927 | 9.25E-15 | 0.66 |
| 29929 | 1181343 | 1181695 | 9.72E-89 | 0.95 |
| 29929 | 1198930 | 1199273 | 1.65E-37 | 0.69 |
| 29929 | 1207234 | 1208122 | 8.69E-75 | 0.87 |
| 29929 | 1217061 | 1217812 | 2.83E-44 | 0.77 |
| 29929 | 1218397 | 1218987 | 1.34E-55 | 0.86 |
| 29929 | 1219284 | 1219517 | 8.08E-20 | 0.9  |
| 29929 | 1228228 | 1228902 | 1.26E-70 | 0.71 |
| 29929 | 1234899 | 1236047 | 2.27E-96 | 0.88 |
| 29929 | 1236482 | 1237684 | 1.51E-33 | 0.66 |
| 29929 | 1239385 | 1240256 | 7.72E-77 | 0.73 |
| 29929 | 1243285 | 1243563 | 2.69E-20 | 0.8  |
| 29929 | 1247317 | 1247661 | 6.06E-37 | 0.9  |
| 29929 | 1253817 | 1254504 | 2.43E-34 | 0.85 |
| 29929 | 1301557 | 1304003 | 2.20E-81 | 0.74 |

|       |         |         |           |      |
|-------|---------|---------|-----------|------|
| 29929 | 1322054 | 1322698 | 6.97E-33  | 0.9  |
| 29929 | 1323576 | 1324067 | 6.58E-42  | 0.94 |
| 29929 | 1324268 | 1324727 | 1.38E-24  | 0.91 |
| 29929 | 1325148 | 1325406 | 9.88E-13  | 0.84 |
| 29929 | 1325865 | 1326425 | 1.50E-36  | 0.83 |
| 29929 | 1329091 | 1329367 | 2.48E-33  | 0.82 |
| 29929 | 1331478 | 1332092 | 1.17E-32  | 0.86 |
| 29929 | 1332818 | 1333770 | 1.73E-86  | 0.9  |
| 29929 | 1339829 | 1340252 | 5.87E-45  | 0.92 |
| 29929 | 1341793 | 1342106 | 3.22E-30  | 0.83 |
| 29929 | 1368929 | 1369748 | 1.44E-43  | 0.86 |
| 29929 | 1383813 | 1384139 | 4.19E-12  | 0.77 |
| 29929 | 1385478 | 1386030 | 2.14E-24  | 0.86 |
| 29929 | 1402888 | 1403112 | 1.57E-06  | 0.75 |
| 29929 | 1441292 | 1441993 | 4.84E-21  | 0.73 |
| 29929 | 1442296 | 1443749 | 2.52E-67  | 0.77 |
| 29929 | 1456590 | 1457215 | 1.01E-119 | 0.72 |
| 29929 | 1497672 | 1498118 | 4.95E-17  | 0.71 |
| 29929 | 1498506 | 1498944 | 3.01E-47  | 0.95 |
| 29929 | 1500575 | 1501431 | 1.24E-35  | 0.85 |
| 29929 | 1501654 | 1502802 | 1.73E-80  | 0.64 |
| 29929 | 1506457 | 1507443 | 3.60E-26  | 0.74 |
| 29929 | 1516550 | 1517052 | 9.07E-11  | 0.81 |
| 29929 | 1550743 | 1551084 | 1.05E-17  | 0.83 |
| 29929 | 1551997 | 1552741 | 5.12E-39  | 0.79 |
| 29929 | 1559086 | 1559386 | 2.04E-13  | 0.63 |
| 29929 | 1561802 | 1562886 | 4.53E-60  | 0.74 |
| 29929 | 1580768 | 1581439 | 1.01E-25  | 0.76 |
| 29929 | 1587334 | 1587978 | 6.32E-14  | 0.8  |
| 29929 | 1589044 | 1591315 | 1.25E-146 | 0.88 |
| 29929 | 1597453 | 1598249 | 9.26E-37  | 0.73 |
| 29929 | 1608181 | 1608554 | 1.25E-15  | 0.66 |
| 29929 | 1611091 | 1611771 | 6.92E-35  | 0.84 |
| 29929 | 1613642 | 1615285 | 9.26E-88  | 0.77 |
| 29929 | 1616906 | 1617562 | 1.92E-25  | 0.71 |
| 29929 | 1635587 | 1635899 | 8.94E-24  | 0.64 |
| 29929 | 1683428 | 1683703 | 2.52E-18  | 0.67 |
| 29929 | 1693939 | 1695578 | 9.45E-43  | 0.79 |
| 29929 | 1697295 | 1697710 | 7.05E-18  | 0.84 |
| 29929 | 1701328 | 1701681 | 1.05E-27  | 0.83 |
| 29929 | 1719517 | 1719952 | 9.13E-32  | 0.79 |
| 29930 | 17284   | 17711   | 3.16E-11  | 0.84 |
| 29930 | 17392   | 17839   | 3.16E-16  | 0.91 |
| 29930 | 108270  | 109085  | 6.23E-57  | 0.91 |
| 29930 | 123532  | 124416  | 8.77E-76  | 0.9  |
| 29930 | 175067  | 175578  | 3.54E-36  | 0.93 |
| 29930 | 176782  | 177046  | 6.09E-21  | 0.77 |
| 29930 | 181798  | 182313  | 7.46E-25  | 0.83 |
| 29930 | 200345  | 200649  | 9.99E-86  | 0.86 |
| 29930 | 237618  | 238867  | 2.75E-62  | 0.87 |
| 29930 | 258280  | 258736  | 1.51E-33  | 0.95 |
| 29930 | 266948  | 267599  | 9.56E-43  | 0.96 |
| 29930 | 282898  | 284120  | 3.49E-42  | 0.76 |



|       |        |        |          |      |
|-------|--------|--------|----------|------|
| 29930 | 286630 | 287308 | 7.45E-62 | 0.93 |
| 29930 | 289845 | 290211 | 5.88E-31 | 0.84 |
| 29930 | 305008 | 305400 | 6.16E-57 | 0.95 |
| 29930 | 319193 | 319696 | 6.55E-17 | 0.73 |
| 29930 | 321324 | 321880 | 1.80E-52 | 0.82 |
| 29930 | 358658 | 359124 | 5.71E-17 | 0.77 |
| 29930 | 365364 | 365673 | 6.03E-14 | 0.87 |
| 29930 | 365888 | 366555 | 5.10E-45 | 0.95 |
| 29930 | 366971 | 367517 | 1.35E-41 | 0.86 |
| 29930 | 386169 | 387480 | 2.11E-54 | 0.67 |
| 29930 | 395621 | 395835 | 1.15E-14 | 0.8  |
| 29930 | 430903 | 431382 | 5.14E-27 | 0.88 |
| 29930 | 434515 | 435388 | 1.23E-66 | 0.88 |
| 29930 | 435622 | 435982 | 1.80E-28 | 0.95 |
| 29930 | 436914 | 437443 | 2.54E-17 | 0.81 |
| 29930 | 437985 | 438526 | 3.08E-44 | 0.93 |
| 29930 | 438730 | 439451 | 3.78E-76 | 0.86 |
| 29930 | 447571 | 448405 | 3.89E-41 | 0.95 |
| 29931 | 10293  | 10556  | 5.54E-04 | 0.89 |
| 29931 | 38940  | 39156  | 4.08E-15 | 0.88 |
| 29931 | 68621  | 68875  | 1.03E-10 | 0.99 |
| 29931 | 106164 | 106412 | 1.35E-05 | 0.76 |
| 29931 | 120616 | 120848 | 2.81E-08 | 0.83 |
| 29931 | 121337 | 121594 | 5.31E-13 | 0.82 |
| 29931 | 128572 | 128779 | 6.27E-04 | 0.82 |
| 29931 | 151174 | 151866 | 1.84E-28 | 0.98 |
| 29931 | 155072 | 155297 | 3.76E-13 | 0.87 |
| 29931 | 183922 | 184259 | 3.06E-10 | 0.89 |
| 29931 | 189827 | 190073 | 1.18E-11 | 0.85 |
| 29931 | 194816 | 195296 | 5.54E-12 | 0.89 |
| 29931 | 210998 | 211269 | 2.46E-15 | 0.85 |
| 29931 | 213772 | 213999 | 5.07E-09 | 0.86 |
| 29931 | 297326 | 297846 | 5.73E-09 | 0.95 |
| 29931 | 306213 | 306564 | 1.96E-27 | 0.81 |
| 29931 | 319865 | 320703 | 3.26E-32 | 0.9  |
| 29931 | 411089 | 411361 | 6.79E-04 | 0.87 |
| 29931 | 473953 | 474166 | 6.21E-05 | 0.88 |
| 29931 | 487862 | 488120 | 2.22E-05 | 0.84 |
| 29931 | 497229 | 497559 | 1.05E-12 | 0.89 |
| 29931 | 533910 | 534262 | 4.26E-17 | 0.9  |
| 29931 | 542627 | 542863 | 4.58E-08 | 0.9  |
| 29931 | 546665 | 547143 | 9.09E-21 | 0.85 |
| 29931 | 549468 | 549682 | 1.05E-27 | 0.8  |
| 29931 | 563689 | 564251 | 2.60E-26 | 0.88 |
| 29932 | 16782  | 17162  | 2.41E-62 | 0.81 |
| 29932 | 44011  | 44250  | 7.94E-17 | 0.82 |
| 29932 | 44556  | 45398  | 4.11E-66 | 0.92 |
| 29932 | 100264 | 100574 | 6.00E-42 | 0.91 |
| 29932 | 114142 | 114475 | 1.88E-25 | 0.91 |
| 29932 | 121659 | 122063 | 3.81E-13 | 0.9  |
| 29932 | 123488 | 124008 | 1.06E-23 | 0.83 |
| 29932 | 130880 | 131207 | 1.72E-33 | 0.79 |
| 29932 | 137238 | 137612 | 3.12E-26 | 0.78 |

|       |        |        |          |      |
|-------|--------|--------|----------|------|
| 29932 | 141414 | 141929 | 5.60E-42 | 0.95 |
| 29932 | 144961 | 146999 | 1.14E-58 | 0.76 |
| 29932 | 147611 | 148701 | 9.07E-48 | 0.82 |
| 29932 | 148914 | 149151 | 3.00E-42 | 0.88 |
| 29932 | 156186 | 156676 | 3.27E-54 | 0.94 |
| 29932 | 175422 | 176027 | 8.40E-38 | 0.79 |
| 29932 | 181179 | 181520 | 9.52E-15 | 0.77 |
| 29932 | 182037 | 183420 | 4.74E-47 | 0.84 |
| 29932 | 185935 | 186242 | 2.30E-17 | 0.84 |
| 29932 | 187491 | 188047 | 7.06E-31 | 0.83 |
| 29932 | 188353 | 189231 | 7.22E-50 | 0.76 |
| 29932 | 189798 | 190480 | 1.09E-48 | 0.76 |
| 29932 | 190827 | 191061 | 5.52E-17 | 0.81 |
| 29932 | 191134 | 191809 | 5.29E-33 | 0.82 |
| 29932 | 199566 | 199786 | 2.09E-07 | 0.67 |
| 29932 | 216042 | 216604 | 4.07E-18 | 0.67 |
| 29932 | 225144 | 225429 | 6.20E-18 | 0.86 |
| 29932 | 226450 | 227040 | 3.41E-21 | 0.85 |
| 29932 | 236283 | 236791 | 1.69E-23 | 0.7  |
| 29932 | 237167 | 237998 | 3.57E-35 | 0.84 |
| 29932 | 238621 | 238960 | 1.62E-20 | 0.73 |
| 29932 | 241649 | 243148 | 3.79E-54 | 0.82 |
| 29932 | 248564 | 249340 | 4.71E-47 | 0.82 |
| 29932 | 249684 | 249935 | 1.42E-24 | 0.84 |
| 29932 | 250455 | 251085 | 2.15E-28 | 0.78 |
| 29932 | 251746 | 252064 | 9.56E-18 | 0.83 |
| 29932 | 281734 | 282690 | 1.63E-17 | 0.88 |
| 29932 | 315780 | 315992 | 8.89E-27 | 0.96 |
| 29933 | 11366  | 11743  | 3.62E-52 | 0.92 |
| 29933 | 15460  | 16092  | 4.68E-21 | 0.71 |
| 29933 | 39629  | 40003  | 6.75E-10 | 0.75 |
| 29933 | 56372  | 56931  | 4.04E-42 | 0.94 |
| 29933 | 57445  | 58030  | 8.33E-30 | 0.82 |
| 29933 | 58447  | 58958  | 7.40E-24 | 0.83 |
| 29933 | 70562  | 71334  | 8.58E-58 | 0.86 |
| 29933 | 74756  | 75195  | 3.97E-16 | 0.77 |
| 29933 | 104634 | 104907 | 5.06E-16 | 0.88 |
| 29933 | 108411 | 108814 | 9.10E-21 | 0.6  |
| 29933 | 112094 | 112568 | 1.99E-49 | 0.9  |
| 29933 | 115276 | 115600 | 9.71E-26 | 0.82 |
| 29933 | 120835 | 121539 | 1.57E-50 | 0.85 |
| 29933 | 134785 | 135078 | 4.16E-44 | 0.67 |
| 29933 | 135607 | 136276 | 1.08E-46 | 0.91 |
| 29933 | 148294 | 148812 | 1.52E-32 | 0.9  |
| 29933 | 166325 | 166790 | 3.51E-30 | 0.83 |
| 29933 | 185497 | 186596 | 2.01E-37 | 0.79 |
| 29933 | 187104 | 187498 | 1.14E-16 | 0.78 |
| 29933 | 189987 | 190426 | 1.11E-25 | 0.79 |
| 29933 | 212197 | 213194 | 1.39E-33 | 0.83 |
| 29933 | 231627 | 231916 | 2.32E-31 | 0.85 |
| 29933 | 233423 | 234603 | 2.40E-78 | 0.68 |
| 29933 | 235368 | 236163 | 3.03E-34 | 0.82 |
| 29933 | 243566 | 243983 | 1.08E-13 | 0.79 |

|       |        |        |           |      |
|-------|--------|--------|-----------|------|
| 29933 | 253997 | 254238 | 1.22E-14  | 0.83 |
| 29933 | 351117 | 351873 | 1.17E-27  | 0.74 |
| 29933 | 352488 | 352963 | 3.52E-23  | 0.77 |
| 29933 | 414840 | 415115 | 1.44E-27  | 0.86 |
| 29934 | 52854  | 53158  | 4.37E-05  | 0.93 |
| 29934 | 70419  | 70646  | 3.86E-14  | 0.88 |
| 29934 | 128330 | 128674 | 9.70E-04  | 0.75 |
| 29935 | 9371   | 9778   | 4.58E-12  | 0.82 |
| 29935 | 11112  | 11519  | 1.10E-05  | 0.89 |
| 29935 | 34696  | 35412  | 1.96E-07  | 0.9  |
| 29935 | 36875  | 37470  | 9.94E-04  | 0.82 |
| 29936 | 19678  | 20098  | 1.07E-06  | 0.84 |
| 29936 | 20358  | 20994  | 1.31E-17  | 0.75 |
| 29936 | 28127  | 28423  | 3.35E-27  | 0.84 |
| 29936 | 37073  | 37572  | 1.85E-16  | 0.79 |
| 29937 | 11280  | 11590  | 4.50E-21  | 0.86 |
| 29937 | 47402  | 47681  | 2.12E-13  | 0.83 |
| 29937 | 50815  | 51394  | 2.27E-26  | 0.64 |
| 29937 | 54373  | 54591  | 2.51E-28  | 0.84 |
| 29937 | 87444  | 87694  | 6.93E-10  | 0.81 |
| 29937 | 96211  | 96476  | 1.59E-12  | 0.77 |
| 29938 | 14829  | 15243  | 5.89E-13  | 0.83 |
| 29938 | 18830  | 19037  | 3.99E-10  | 0.81 |
| 29938 | 29487  | 30634  | 2.63E-30  | 0.7  |
| 29938 | 31233  | 31668  | 1.47E-69  | 0.93 |
| 29938 | 43370  | 44018  | 3.06E-24  | 0.66 |
| 29938 | 64886  | 65672  | 3.10E-34  | 0.9  |
| 29938 | 65609  | 67207  | 1.78E-51  | 0.7  |
| 29938 | 91613  | 92890  | 1.88E-85  | 0.86 |
| 29938 | 95801  | 96413  | 1.26E-19  | 0.82 |
| 29938 | 124939 | 125336 | 5.59E-71  | 0.9  |
| 29938 | 125644 | 125956 | 7.40E-63  | 0.93 |
| 29938 | 126625 | 128062 | 9.58E-75  | 0.91 |
| 29938 | 144411 | 144915 | 3.26E-21  | 0.6  |
| 29938 | 160704 | 160986 | 3.69E-21  | 0.75 |
| 29938 | 164157 | 165016 | 2.25E-38  | 0.7  |
| 29938 | 184200 | 184959 | 3.23E-47  | 0.86 |
| 29938 | 207106 | 208176 | 7.85E-110 | 0.93 |
| 29938 | 217710 | 218420 | 5.33E-27  | 0.8  |
| 29938 | 223684 | 224083 | 2.12E-15  | 0.79 |
| 29938 | 224951 | 225421 | 6.76E-38  | 0.86 |
| 29938 | 228424 | 228931 | 2.00E-20  | 0.77 |
| 29938 | 261399 | 261978 | 1.61E-17  | 0.71 |
| 29938 | 266593 | 266833 | 8.63E-16  | 0.84 |
| 29938 | 273690 | 273929 | 3.06E-27  | 0.75 |
| 29938 | 274312 | 275296 | 1.22E-42  | 0.81 |
| 29939 | 3426   | 3663   | 3.80E-12  | 0.79 |
| 29939 | 49361  | 49770  | 2.40E-30  | 0.81 |
| 29939 | 55405  | 55954  | 1.10E-71  | 0.9  |
| 29939 | 61840  | 62203  | 1.19E-21  | 0.68 |
| 29939 | 89935  | 90230  | 3.58E-07  | 0.97 |
| 29939 | 109886 | 110230 | 2.72E-48  | 0.92 |
| 29939 | 115049 | 115321 | 7.05E-39  | 0.75 |

|       |        |        |           |      |
|-------|--------|--------|-----------|------|
| 29939 | 122191 | 122686 | 8.47E-59  | 0.93 |
| 29939 | 123382 | 123993 | 5.87E-57  | 0.95 |
| 29939 | 187953 | 188248 | 5.94E-07  | 0.67 |
| 29939 | 207571 | 208020 | 2.87E-13  | 0.8  |
| 29939 | 252139 | 252737 | 2.61E-41  | 0.94 |
| 29939 | 254221 | 254778 | 3.55E-41  | 0.93 |
| 29939 | 255006 | 256030 | 9.10E-70  | 0.87 |
| 29939 | 259226 | 259721 | 1.36E-11  | 0.82 |
| 29939 | 260920 | 261174 | 4.38E-18  | 0.68 |
| 29939 | 281090 | 281385 | 3.92E-34  | 0.91 |
| 29939 | 296135 | 296550 | 2.57E-21  | 0.88 |
| 29939 | 297387 | 298048 | 7.77E-43  | 0.88 |
| 29939 | 299105 | 299381 | 3.21E-18  | 0.75 |
| 29939 | 300462 | 300905 | 2.86E-25  | 0.83 |
| 29939 | 319979 | 320610 | 1.92E-49  | 0.93 |
| 29939 | 325157 | 326483 | 1.11E-123 | 0.76 |
| 29939 | 326757 | 327233 | 4.15E-30  | 0.93 |
| 29939 | 338682 | 341054 | 3.41E-126 | 0.8  |
| 29939 | 370687 | 371407 | 1.12E-47  | 0.82 |
| 29939 | 376612 | 377802 | 1.06E-70  | 0.75 |
| 29939 | 383336 | 383909 | 3.24E-32  | 0.87 |
| 29939 | 386456 | 387073 | 1.11E-96  | 0.98 |
| 29939 | 410075 | 410421 | 7.09E-32  | 0.95 |
| 29939 | 410736 | 410943 | 1.06E-38  | 0.91 |
| 29939 | 462746 | 463074 | 1.38E-16  | 0.85 |
| 29939 | 488990 | 489229 | 9.80E-05  | 1    |
| 29939 | 490312 | 490917 | 7.21E-15  | 0.83 |
| 29939 | 524591 | 525499 | 7.36E-24  | 0.6  |
| 29939 | 531391 | 531731 | 1.67E-25  | 0.83 |
| 29939 | 531958 | 533530 | 5.94E-56  | 0.86 |
| 29939 | 534885 | 536205 | 3.48E-151 | 0.9  |
| 29939 | 536551 | 536870 | 2.91E-43  | 0.86 |
| 29939 | 537144 | 537410 | 1.81E-38  | 0.88 |
| 29939 | 538055 | 538830 | 2.40E-158 | 0.93 |
| 29939 | 555482 | 555775 | 3.88E-11  | 0.64 |
| 29939 | 560771 | 561339 | 8.34E-34  | 0.83 |
| 29939 | 563772 | 564120 | 3.75E-07  | 0.78 |
| 29939 | 573810 | 574501 | 7.15E-14  | 0.84 |
| 29940 | 56686  | 58031  | 1.21E-77  | 0.86 |
| 29940 | 92173  | 92389  | 9.39E-43  | 0.8  |
| 29940 | 97607  | 98523  | 4.17E-56  | 0.84 |
| 29940 | 98851  | 100831 | 6.97E-161 | 0.94 |
| 29940 | 112452 | 112664 | 8.23E-32  | 0.93 |
| 29940 | 137031 | 137350 | 4.68E-24  | 0.97 |
| 29940 | 138057 | 139283 | 3.36E-53  | 0.93 |
| 29940 | 143010 | 143321 | 3.01E-20  | 0.88 |
| 29940 | 219118 | 219890 | 1.55E-41  | 0.94 |
| 29940 | 220185 | 220652 | 3.35E-08  | 0.9  |
| 29940 | 222007 | 222757 | 1.59E-18  | 0.8  |
| 29940 | 301112 | 301570 | 2.68E-25  | 0.77 |
| 29940 | 304108 | 304414 | 7.59E-13  | 0.8  |
| 29940 | 337111 | 337683 | 9.05E-32  | 0.95 |
| 29940 | 339266 | 340080 | 1.68E-39  | 0.85 |

|       |        |        |           |      |
|-------|--------|--------|-----------|------|
| 29940 | 340414 | 341027 | 7.44E-34  | 0.95 |
| 29940 | 341441 | 342014 | 1.74E-49  | 0.91 |
| 29940 | 343256 | 343520 | 7.37E-33  | 0.89 |
| 29940 | 346604 | 347735 | 2.28E-28  | 0.87 |
| 29940 | 349007 | 349733 | 1.38E-56  | 0.88 |
| 29940 | 350512 | 351432 | 2.69E-52  | 0.83 |
| 29940 | 351678 | 352455 | 4.15E-12  | 0.83 |
| 29940 | 354609 | 355081 | 8.57E-29  | 0.74 |
| 29940 | 355873 | 356144 | 1.65E-07  | 0.87 |
| 29941 | 339    | 1503   | 2.85E-53  | 0.88 |
| 29941 | 9166   | 9612   | 9.20E-29  | 0.9  |
| 29941 | 13393  | 13980  | 1.18E-36  | 0.86 |
| 29941 | 65627  | 66411  | 7.47E-50  | 0.8  |
| 29941 | 66705  | 66945  | 6.20E-21  | 0.9  |
| 29941 | 92836  | 93378  | 2.13E-26  | 0.89 |
| 29941 | 93946  | 94435  | 9.13E-48  | 0.79 |
| 29941 | 95220  | 95565  | 2.73E-15  | 0.89 |
| 29941 | 100127 | 100564 | 3.81E-32  | 0.96 |
| 29941 | 102329 | 103125 | 7.98E-58  | 0.92 |
| 29941 | 108273 | 109357 | 5.27E-48  | 0.74 |
| 29941 | 114084 | 114517 | 7.44E-26  | 0.88 |
| 29941 | 115393 | 116594 | 1.19E-77  | 0.92 |
| 29941 | 129629 | 130124 | 6.14E-15  | 0.8  |
| 29941 | 143735 | 144116 | 7.91E-08  | 0.77 |
| 29942 | 8      | 955    | 2.12E-26  | 0.9  |
| 29942 | 1255   | 1491   | 1.42E-16  | 0.97 |
| 29942 | 13462  | 14457  | 5.39E-15  | 0.89 |
| 29942 | 18718  | 19850  | 1.70E-31  | 0.75 |
| 29942 | 33085  | 33455  | 6.13E-16  | 0.93 |
| 29942 | 36309  | 36724  | 7.36E-08  | 0.89 |
| 29942 | 62993  | 64015  | 2.56E-20  | 0.68 |
| 29942 | 64838  | 65167  | 4.19E-25  | 0.95 |
| 29942 | 102364 | 102679 | 7.22E-09  | 0.77 |
| 29942 | 103145 | 103447 | 2.40E-07  | 0.73 |
| 29942 | 140094 | 140643 | 3.26E-25  | 0.96 |
| 29942 | 152951 | 154021 | 6.68E-48  | 0.69 |
| 29942 | 164646 | 164953 | 1.18E-29  | 0.92 |
| 29942 | 174902 | 175299 | 2.82E-42  | 0.9  |
| 29942 | 176443 | 176810 | 4.24E-31  | 0.98 |
| 29942 | 192333 | 192805 | 3.16E-13  | 0.65 |
| 29942 | 194199 | 194638 | 6.60E-34  | 0.9  |
| 29942 | 293668 | 295613 | 1.99E-145 | 0.93 |
| 29942 | 362090 | 362588 | 1.72E-69  | 0.93 |
| 29942 | 366757 | 367192 | 3.91E-150 | 0.95 |
| 29942 | 367713 | 368644 | 1.77E-58  | 0.93 |
| 29942 | 371247 | 372075 | 2.40E-46  | 0.83 |
| 29942 | 374444 | 374789 | 4.30E-19  | 0.81 |
| 29942 | 377735 | 378277 | 2.28E-29  | 0.82 |
| 29942 | 381457 | 382070 | 1.45E-22  | 0.8  |
| 29942 | 383005 | 383321 | 2.57E-17  | 0.84 |
| 29942 | 407357 | 407963 | 5.78E-76  | 0.9  |
| 29942 | 408171 | 408586 | 3.65E-13  | 0.8  |
| 29942 | 408928 | 409536 | 2.30E-11  | 0.8  |

|       |        |        |          |      |
|-------|--------|--------|----------|------|
| 29942 | 463226 | 463533 | 3.82E-14 | 0.72 |
| 29942 | 492044 | 492332 | 2.19E-04 | 0.92 |
| 29942 | 494606 | 494859 | 1.70E-08 | 0.84 |
| 29942 | 498570 | 499250 | 9.18E-23 | 0.91 |
| 29942 | 520888 | 521331 | 1.25E-10 | 0.78 |
| 29942 | 523001 | 523380 | 3.58E-20 | 0.84 |
| 29942 | 524139 | 524529 | 1.56E-07 | 0.91 |
| 29942 | 530726 | 531963 | 1.35E-34 | 0.73 |
| 29942 | 540636 | 542454 | 2.61E-61 | 0.79 |
| 29942 | 598339 | 598724 | 1.44E-57 | 0.95 |
| 29942 | 616478 | 616779 | 9.80E-15 | 0.9  |
| 29942 | 618662 | 619144 | 2.85E-09 | 0.63 |
| 29942 | 624905 | 625112 | 5.73E-23 | 0.86 |
| 29942 | 630369 | 630611 | 1.02E-12 | 0.9  |
| 29942 | 632045 | 632885 | 1.24E-16 | 0.68 |
| 29942 | 634549 | 634993 | 5.55E-13 | 0.78 |
| 29942 | 653014 | 653818 | 1.44E-21 | 0.61 |
| 29942 | 654862 | 655156 | 1.97E-11 | 0.79 |
| 29942 | 659249 | 659747 | 7.45E-58 | 0.92 |
| 29942 | 660694 | 660954 | 1.47E-36 | 0.95 |
| 29942 | 661420 | 661889 | 5.89E-18 | 0.95 |
| 29943 | 251    | 568    | 3.63E-15 | 0.67 |
| 29943 | 1031   | 1496   | 2.91E-23 | 0.88 |
| 29943 | 4255   | 5416   | 6.78E-49 | 0.95 |
| 29943 | 5929   | 6319   | 8.34E-19 | 0.92 |
| 29943 | 21764  | 22137  | 1.47E-26 | 0.68 |
| 29943 | 24351  | 25197  | 4.50E-72 | 0.96 |
| 29943 | 29519  | 29909  | 1.11E-16 | 0.95 |
| 29943 | 81220  | 82332  | 5.29E-55 | 0.75 |
| 29943 | 102686 | 103723 | 2.99E-48 | 0.7  |
| 29943 | 108497 | 108771 | 1.47E-08 | 0.79 |
| 29943 | 112981 | 113798 | 5.39E-34 | 0.79 |
| 29943 | 136766 | 137135 | 5.79E-18 | 0.94 |
| 29944 | 52729  | 52981  | 7.29E-33 | 0.73 |
| 29945 | 7847   | 8253   | 4.73E-28 | 0.89 |
| 29945 | 18256  | 19251  | 3.17E-27 | 0.61 |
| 29945 | 25316  | 25738  | 1.61E-10 | 0.77 |
| 29945 | 26484  | 27459  | 2.68E-77 | 0.77 |
| 29945 | 29643  | 30145  | 1.01E-41 | 0.96 |
| 29945 | 37019  | 37267  | 1.06E-14 | 0.95 |
| 29945 | 38281  | 38778  | 1.39E-28 | 0.78 |
| 29945 | 41897  | 42356  | 7.93E-23 | 0.7  |
| 29945 | 51492  | 52180  | 5.21E-98 | 0.87 |
| 29945 | 56091  | 56536  | 1.49E-25 | 0.82 |
| 29945 | 59965  | 60770  | 2.76E-14 | 0.79 |
| 29945 | 62545  | 62933  | 3.33E-38 | 0.91 |
| 29945 | 63387  | 64025  | 8.88E-53 | 0.93 |
| 29945 | 79088  | 79493  | 8.96E-18 | 0.79 |
| 29946 | 25299  | 25913  | 1.60E-13 | 0.93 |
| 29946 | 43536  | 44091  | 1.34E-05 | 0.83 |
| 29948 | 12822  | 13245  | 4.20E-23 | 0.74 |
| 29948 | 23292  | 23736  | 2.75E-20 | 0.76 |
| 29948 | 23969  | 24343  | 6.92E-10 | 0.81 |

|       |        |        |           |      |
|-------|--------|--------|-----------|------|
| 29948 | 39592  | 39930  | 2.40E-10  | 0.78 |
| 29948 | 40921  | 41691  | 9.18E-116 | 0.89 |
| 29948 | 62462  | 62773  | 2.70E-23  | 0.75 |
| 29948 | 62982  | 63970  | 3.22E-122 | 0.92 |
| 29948 | 64613  | 65686  | 4.76E-66  | 0.87 |
| 29948 | 65893  | 66459  | 1.69E-16  | 0.89 |
| 29948 | 67920  | 68207  | 8.71E-23  | 0.87 |
| 29948 | 74691  | 76401  | 7.69E-115 | 0.86 |
| 29948 | 88451  | 88845  | 6.50E-19  | 0.71 |
| 29948 | 97330  | 98034  | 1.05E-21  | 0.8  |
| 29948 | 98580  | 98783  | 5.50E-33  | 0.88 |
| 29948 | 101721 | 102302 | 1.27E-09  | 0.78 |
| 29948 | 130649 | 130885 | 1.78E-11  | 0.85 |
| 29948 | 131151 | 131744 | 9.83E-15  | 0.79 |
| 29948 | 171302 | 171662 | 2.39E-07  | 0.8  |
| 29948 | 172785 | 173693 | 6.34E-14  | 0.83 |
| 29948 | 190406 | 190993 | 2.63E-29  | 0.73 |
| 29948 | 217568 | 218013 | 9.79E-30  | 0.94 |
| 29948 | 218216 | 218928 | 4.73E-24  | 0.77 |
| 29948 | 236301 | 236510 | 6.51E-83  | 0.93 |
| 29948 | 236787 | 237050 | 1.25E-57  | 0.91 |
| 29948 | 237743 | 238245 | 1.79E-25  | 0.71 |
| 29948 | 239314 | 240405 | 3.40E-40  | 0.71 |
| 29948 | 246150 | 246812 | 5.84E-33  | 0.81 |
| 29948 | 247183 | 247832 | 3.13E-52  | 0.76 |
| 29948 | 250569 | 251036 | 8.81E-19  | 0.61 |
| 29948 | 251656 | 251946 | 3.81E-22  | 0.91 |
| 29948 | 264537 | 264957 | 7.44E-10  | 0.8  |
| 29948 | 273816 | 275004 | 4.14E-85  | 0.77 |
| 29948 | 300424 | 301172 | 1.55E-16  | 0.6  |
| 29948 | 301696 | 301931 | 5.98E-32  | 0.86 |
| 29948 | 308371 | 308650 | 3.41E-14  | 0.74 |
| 29948 | 312638 | 313100 | 3.90E-22  | 0.82 |
| 29948 | 322048 | 322546 | 6.01E-26  | 0.93 |
| 29948 | 329785 | 330192 | 2.40E-34  | 0.9  |
| 29948 | 336570 | 338450 | 5.07E-72  | 0.84 |
| 29948 | 342884 | 343833 | 9.48E-40  | 0.65 |
| 29948 | 368307 | 368885 | 1.14E-98  | 0.89 |
| 29948 | 392773 | 393208 | 1.74E-14  | 0.84 |
| 29948 | 396118 | 396563 | 4.49E-17  | 0.85 |
| 29948 | 402342 | 402724 | 4.68E-16  | 0.76 |
| 29948 | 424510 | 424809 | 1.22E-11  | 0.77 |
| 29949 | 26758  | 27423  | 5.41E-41  | 0.8  |
| 29949 | 45451  | 46495  | 3.01E-57  | 0.71 |
| 29949 | 54303  | 55451  | 1.06E-68  | 0.82 |
| 29950 | 18574  | 19157  | 3.04E-44  | 0.91 |
| 29950 | 20942  | 22895  | 1.32E-149 | 0.9  |
| 29950 | 29303  | 31926  | 7.02E-131 | 0.69 |
| 29950 | 37199  | 38374  | 3.59E-44  | 0.77 |
| 29950 | 81646  | 82128  | 1.92E-22  | 0.85 |
| 29950 | 82841  | 83411  | 4.41E-47  | 0.79 |
| 29950 | 88704  | 89026  | 1.23E-19  | 0.72 |
| 29950 | 119303 | 120161 | 4.54E-45  | 0.61 |

|       |        |        |           |      |
|-------|--------|--------|-----------|------|
| 29950 | 130533 | 130792 | 1.14E-26  | 0.88 |
| 29950 | 133162 | 134014 | 1.97E-26  | 0.65 |
| 29950 | 148993 | 149258 | 1.30E-22  | 0.78 |
| 29950 | 157183 | 158226 | 3.10E-24  | 0.8  |
| 29950 | 184439 | 185230 | 2.20E-18  | 0.72 |
| 29950 | 186023 | 186673 | 4.82E-41  | 0.88 |
| 29950 | 187520 | 187806 | 4.17E-29  | 0.82 |
| 29950 | 189084 | 189387 | 2.53E-38  | 0.91 |
| 29950 | 190425 | 191244 | 3.36E-23  | 0.71 |
| 29950 | 214435 | 215327 | 4.34E-70  | 0.84 |
| 29950 | 218506 | 219017 | 1.46E-52  | 0.95 |
| 29950 | 235033 | 235264 | 4.15E-16  | 0.8  |
| 29950 | 235710 | 236232 | 6.91E-15  | 0.88 |
| 29950 | 236452 | 237072 | 1.29E-23  | 0.81 |
| 29950 | 256948 | 259248 | 8.65E-108 | 0.82 |
| 29950 | 259463 | 260288 | 1.16E-127 | 0.85 |
| 29950 | 296579 | 297278 | 6.36E-31  | 0.68 |
| 29950 | 300057 | 300628 | 1.24E-23  | 0.68 |
| 29950 | 330875 | 331575 | 1.11E-28  | 0.76 |
| 29950 | 332278 | 333597 | 8.18E-61  | 0.68 |
| 29950 | 340703 | 340912 | 1.65E-17  | 0.86 |
| 29950 | 341117 | 341441 | 2.02E-39  | 0.91 |
| 29950 | 341720 | 342493 | 4.85E-36  | 0.83 |
| 29950 | 393949 | 394379 | 5.75E-25  | 0.87 |
| 29950 | 398035 | 399383 | 9.97E-43  | 0.75 |
| 29950 | 412477 | 412965 | 5.09E-21  | 0.91 |
| 29950 | 414148 | 414675 | 1.35E-29  | 0.73 |
| 29951 | 707    | 2185   | 1.00E-72  | 0.9  |
| 29951 | 3083   | 5602   | 6.31E-231 | 0.93 |
| 29951 | 5602   | 6393   | 2.95E-113 | 0.96 |
| 29951 | 45864  | 46358  | 6.90E-33  | 0.98 |
| 29951 | 46693  | 47477  | 2.36E-59  | 0.97 |
| 29951 | 74557  | 74932  | 1.21E-22  | 0.94 |
| 29951 | 82627  | 83473  | 1.43E-44  | 0.82 |
| 29951 | 83978  | 84787  | 5.32E-37  | 0.67 |
| 29951 | 86340  | 87714  | 9.03E-50  | 0.82 |
| 29951 | 88528  | 89179  | 2.31E-42  | 0.9  |
| 29951 | 97118  | 97479  | 1.66E-22  | 0.92 |
| 29953 | 16096  | 16792  | 2.61E-29  | 0.75 |
| 29953 | 17184  | 17900  | 1.66E-92  | 0.88 |
| 29953 | 19919  | 20573  | 2.72E-15  | 0.8  |
| 29953 | 31012  | 31428  | 1.68E-25  | 0.9  |
| 29953 | 60447  | 60737  | 5.59E-23  | 0.7  |
| 29953 | 74315  | 74858  | 8.98E-18  | 0.8  |
| 29953 | 76618  | 76860  | 3.58E-12  | 0.62 |
| 29953 | 84961  | 85319  | 1.32E-15  | 0.89 |
| 29953 | 89691  | 90055  | 2.35E-37  | 0.9  |
| 29953 | 101836 | 102153 | 2.18E-07  | 1    |
| 29953 | 162826 | 163825 | 7.72E-53  | 0.7  |
| 29953 | 164183 | 164721 | 5.15E-27  | 0.82 |
| 29953 | 167058 | 167390 | 3.03E-12  | 0.69 |
| 29953 | 171923 | 172276 | 1.37E-14  | 0.74 |
| 29953 | 177770 | 178008 | 1.50E-26  | 0.92 |



|       |        |        |           |      |
|-------|--------|--------|-----------|------|
| 29953 | 181125 | 181426 | 3.99E-13  | 0.8  |
| 29953 | 181830 | 182327 | 1.27E-46  | 0.9  |
| 29953 | 199824 | 200072 | 8.59E-12  | 0.82 |
| 29953 | 200453 | 201376 | 6.13E-37  | 0.89 |
| 29953 | 204603 | 204890 | 9.75E-18  | 0.84 |
| 29953 | 206686 | 207168 | 9.17E-20  | 0.78 |
| 29953 | 209833 | 211176 | 1.69E-51  | 0.79 |
| 29953 | 256203 | 257215 | 9.06E-94  | 0.85 |
| 29953 | 260651 | 261388 | 5.46E-36  | 0.94 |
| 29954 | 4082   | 4408   | 1.96E-08  | 0.97 |
| 29954 | 36890  | 37330  | 6.13E-11  | 0.73 |
| 29954 | 46002  | 46391  | 3.97E-14  | 0.9  |
| 29954 | 46638  | 47038  | 3.74E-12  | 0.85 |
| 29954 | 47723  | 48588  | 5.54E-13  | 0.98 |
| 29954 | 56806  | 57058  | 1.08E-28  | 0.9  |
| 29954 | 61519  | 61752  | 3.58E-15  | 0.84 |
| 29954 | 72855  | 73087  | 8.83E-07  | 0.77 |
| 29954 | 108838 | 109435 | 1.20E-11  | 0.6  |
| 29954 | 138877 | 139205 | 2.12E-19  | 0.93 |
| 29954 | 152789 | 153257 | 8.62E-13  | 0.96 |
| 29954 | 187397 | 187993 | 1.44E-70  | 0.96 |
| 29954 | 195248 | 196065 | 5.38E-48  | 0.92 |
| 29954 | 196628 | 196998 | 1.12E-21  | 0.88 |
| 29954 | 197384 | 198039 | 8.89E-25  | 0.92 |
| 29954 | 198325 | 198847 | 5.60E-10  | 0.84 |
| 29954 | 237479 | 237682 | 9.52E-07  | 0.83 |
| 29954 | 239795 | 240010 | 3.17E-11  | 0.85 |
| 29954 | 257781 | 258551 | 2.20E-06  | 0.9  |
| 29954 | 258941 | 259236 | 3.88E-09  | 0.92 |
| 29954 | 314180 | 314393 | 2.42E-07  | 0.93 |
| 29954 | 315835 | 316077 | 3.39E-20  | 0.8  |
| 29954 | 323790 | 324028 | 7.04E-05  | 0.78 |
| 29954 | 367193 | 367561 | 2.26E-09  | 0.96 |
| 29955 | 8730   | 9122   | 1.94E-24  | 0.78 |
| 29955 | 18598  | 18808  | 7.46E-12  | 0.84 |
| 29955 | 30267  | 31545  | 6.57E-127 | 0.94 |
| 29955 | 31891  | 32648  | 2.15E-90  | 0.91 |
| 29955 | 44598  | 45016  | 2.15E-14  | 0.83 |
| 29955 | 45772  | 46370  | 1.35E-47  | 0.92 |
| 29955 | 51081  | 51326  | 3.51E-19  | 0.91 |
| 29955 | 52329  | 52790  | 1.70E-15  | 0.72 |
| 29955 | 53005  | 53320  | 1.19E-67  | 0.94 |
| 29955 | 54264  | 55079  | 3.20E-101 | 0.93 |
| 29955 | 55456  | 56758  | 2.26E-27  | 0.77 |
| 29955 | 57593  | 57939  | 3.87E-17  | 0.82 |
| 29955 | 122154 | 122497 | 5.14E-05  | 0.67 |
| 29955 | 152735 | 152943 | 1.72E-09  | 0.85 |
| 29955 | 222080 | 222756 | 1.32E-29  | 0.85 |
| 29955 | 309414 | 309906 | 7.34E-04  | 0.84 |
| 29955 | 319937 | 320476 | 3.61E-26  | 0.94 |
| 29955 | 441119 | 441406 | 2.20E-04  | 0.88 |
| 29955 | 466768 | 467987 | 2.58E-95  | 0.94 |
| 29955 | 470034 | 470516 | 1.13E-39  | 0.94 |

|       |         |         |           |      |
|-------|---------|---------|-----------|------|
| 29955 | 470969  | 471633  | 2.62E-65  | 0.87 |
| 29955 | 472705  | 473108  | 3.41E-33  | 0.88 |
| 29955 | 473693  | 474159  | 3.89E-22  | 0.74 |
| 29955 | 479212  | 479660  | 2.06E-36  | 0.83 |
| 29955 | 479862  | 480137  | 2.07E-28  | 0.92 |
| 29955 | 480849  | 481101  | 1.58E-19  | 0.99 |
| 29955 | 481396  | 481598  | 3.20E-33  | 0.95 |
| 29955 | 482822  | 483620  | 1.14E-30  | 0.63 |
| 29955 | 539828  | 540314  | 9.19E-12  | 1    |
| 29955 | 546109  | 546338  | 7.25E-23  | 0.96 |
| 29955 | 559625  | 560175  | 2.29E-33  | 0.97 |
| 29955 | 650852  | 651498  | 9.87E-19  | 0.83 |
| 29955 | 719933  | 720286  | 4.89E-10  | 0.95 |
| 29955 | 761455  | 762061  | 2.11E-43  | 0.76 |
| 29955 | 762725  | 763534  | 3.45E-40  | 0.88 |
| 29955 | 766696  | 767362  | 4.82E-24  | 0.81 |
| 29955 | 809220  | 810861  | 9.24E-70  | 0.77 |
| 29955 | 815271  | 815651  | 1.85E-65  | 0.92 |
| 29955 | 817200  | 817443  | 3.46E-45  | 0.97 |
| 29955 | 817656  | 817988  | 4.13E-44  | 0.95 |
| 29955 | 827798  | 828411  | 2.54E-09  | 0.82 |
| 29955 | 833487  | 834149  | 3.41E-36  | 0.95 |
| 29955 | 836019  | 836452  | 2.19E-20  | 0.93 |
| 29955 | 862336  | 863199  | 4.49E-40  | 0.74 |
| 29955 | 863400  | 865796  | 4.56E-126 | 0.87 |
| 29955 | 873300  | 873854  | 1.97E-29  | 0.91 |
| 29955 | 875538  | 877143  | 1.81E-44  | 0.8  |
| 29955 | 878779  | 879027  | 2.86E-13  | 0.82 |
| 29955 | 879326  | 879697  | 1.01E-40  | 0.93 |
| 29955 | 884211  | 884739  | 5.92E-56  | 0.97 |
| 29955 | 918497  | 918721  | 1.08E-05  | 0.95 |
| 29955 | 947136  | 947497  | 4.75E-12  | 0.88 |
| 29955 | 974034  | 974833  | 6.59E-35  | 0.82 |
| 29955 | 978108  | 978534  | 2.81E-23  | 0.88 |
| 29955 | 1002650 | 1003701 | 5.42E-52  | 0.76 |
| 29955 | 1010062 | 1010762 | 7.53E-24  | 0.79 |
| 29955 | 1012266 | 1012516 | 5.20E-57  | 0.94 |
| 29955 | 1012872 | 1014059 | 1.01E-96  | 0.89 |
| 29955 | 1019387 | 1020337 | 6.29E-38  | 0.87 |
| 29955 | 1020539 | 1020805 | 2.14E-34  | 0.92 |
| 29955 | 1022219 | 1023421 | 6.60E-77  | 0.91 |
| 29955 | 1026568 | 1026840 | 5.19E-26  | 0.95 |
| 29955 | 1027526 | 1028058 | 8.52E-23  | 0.89 |
| 29956 | 26215   | 26621   | 8.17E-20  | 0.86 |
| 29956 | 26890   | 27480   | 1.24E-16  | 0.81 |
| 29956 | 43832   | 44225   | 4.84E-24  | 0.67 |
| 29956 | 49743   | 50107   | 5.27E-18  | 0.85 |
| 29956 | 50751   | 50987   | 3.28E-12  | 0.83 |
| 29957 | 35948   | 36358   | 5.29E-20  | 0.74 |
| 29957 | 53927   | 54952   | 4.93E-56  | 0.96 |
| 29957 | 142625  | 144127  | 3.28E-43  | 0.84 |
| 29957 | 202536  | 202933  | 2.42E-54  | 0.98 |
| 29957 | 221501  | 222542  | 2.60E-29  | 0.85 |

|       |         |         |           |      |
|-------|---------|---------|-----------|------|
| 29957 | 224218  | 224825  | 3.77E-24  | 0.78 |
| 29957 | 248795  | 249164  | 2.13E-10  | 0.77 |
| 29957 | 249527  | 250028  | 1.51E-42  | 0.94 |
| 29957 | 313329  | 314458  | 1.34E-63  | 0.81 |
| 29957 | 320767  | 321266  | 1.17E-108 | 0.96 |
| 29957 | 392581  | 392988  | 1.67E-18  | 0.91 |
| 29957 | 399330  | 400001  | 2.12E-23  | 0.69 |
| 29957 | 400837  | 401331  | 1.37E-15  | 0.74 |
| 29957 | 407676  | 408348  | 7.67E-92  | 0.93 |
| 29957 | 425346  | 425669  | 3.86E-21  | 0.9  |
| 29957 | 437032  | 437534  | 6.58E-32  | 0.87 |
| 29957 | 497720  | 497935  | 1.60E-16  | 0.9  |
| 29957 | 557737  | 559239  | 9.45E-122 | 0.97 |
| 29957 | 563183  | 564018  | 1.30E-15  | 0.97 |
| 29957 | 577944  | 578908  | 9.02E-59  | 0.93 |
| 29957 | 593656  | 593970  | 2.99E-22  | 0.85 |
| 29957 | 594181  | 594512  | 8.10E-19  | 0.74 |
| 29957 | 617741  | 618482  | 3.03E-80  | 0.96 |
| 29957 | 618761  | 619383  | 1.03E-61  | 0.98 |
| 29957 | 631448  | 631930  | 7.98E-62  | 0.87 |
| 29957 | 632334  | 633057  | 4.75E-59  | 0.93 |
| 29957 | 635284  | 635866  | 4.95E-17  | 0.84 |
| 29957 | 636102  | 636332  | 1.85E-25  | 0.9  |
| 29957 | 647307  | 647809  | 1.05E-12  | 0.97 |
| 29957 | 709884  | 710632  | 5.46E-41  | 0.96 |
| 29957 | 717769  | 718450  | 1.77E-47  | 0.9  |
| 29957 | 718685  | 719507  | 2.41E-70  | 0.94 |
| 29957 | 719751  | 720092  | 3.94E-46  | 0.94 |
| 29957 | 720355  | 720745  | 2.76E-49  | 0.95 |
| 29957 | 721235  | 722156  | 2.25E-98  | 0.95 |
| 29957 | 739029  | 739437  | 4.16E-40  | 0.95 |
| 29957 | 740805  | 741149  | 4.18E-27  | 0.95 |
| 29957 | 742142  | 742489  | 9.08E-21  | 0.97 |
| 29957 | 745554  | 745878  | 1.03E-25  | 0.78 |
| 29957 | 746300  | 746609  | 7.15E-80  | 0.93 |
| 29957 | 747604  | 748816  | 4.64E-71  | 0.64 |
| 29957 | 782478  | 783289  | 2.43E-34  | 0.88 |
| 29957 | 787246  | 787821  | 4.32E-12  | 0.77 |
| 29957 | 793512  | 793943  | 8.58E-09  | 0.98 |
| 29957 | 807660  | 808135  | 9.14E-09  | 0.9  |
| 29957 | 809672  | 809976  | 1.40E-06  | 1    |
| 29957 | 810204  | 810454  | 2.45E-18  | 0.79 |
| 29957 | 811133  | 811416  | 5.44E-11  | 0.82 |
| 29957 | 939770  | 940168  | 2.26E-29  | 0.97 |
| 29957 | 995146  | 995745  | 1.05E-29  | 0.89 |
| 29957 | 995991  | 997047  | 2.22E-31  | 0.81 |
| 29957 | 998442  | 998756  | 2.41E-44  | 0.89 |
| 29957 | 1004552 | 1005109 | 5.32E-45  | 0.96 |
| 29957 | 1005520 | 1005812 | 1.96E-30  | 0.9  |
| 29957 | 1041598 | 1042391 | 6.24E-23  | 0.87 |
| 29957 | 1047735 | 1048330 | 4.29E-82  | 0.93 |
| 29957 | 1048787 | 1049122 | 2.55E-71  | 0.91 |
| 29957 | 1059348 | 1059601 | 7.67E-30  | 0.95 |

|       |         |         |          |      |
|-------|---------|---------|----------|------|
| 29957 | 1102028 | 1102287 | 2.48E-10 | 0.98 |
| 29957 | 1108026 | 1108317 | 8.16E-07 | 0.66 |
| 29957 | 1115353 | 1115684 | 4.66E-15 | 0.97 |
| 29957 | 1139335 | 1139686 | 2.63E-17 | 0.82 |
| 29957 | 1139967 | 1140379 | 3.09E-15 | 0.83 |
| 29957 | 1155646 | 1156044 | 6.31E-77 | 0.94 |
| 29957 | 1158370 | 1158732 | 2.50E-37 | 0.86 |
| 29957 | 1160168 | 1160613 | 9.61E-23 | 0.93 |
| 29957 | 1160912 | 1161312 | 1.33E-23 | 0.94 |
| 29957 | 1167712 | 1167950 | 1.52E-10 | 0.74 |
| 29957 | 1172752 | 1173065 | 4.42E-09 | 0.83 |
| 29958 | 98104   | 98930   | 1.18E-05 | 0.91 |
| 29958 | 238362  | 238603  | 2.89E-04 | 0.85 |
| 29958 | 257131  | 257794  | 2.12E-26 | 0.89 |
| 29958 | 274167  | 274847  | 8.00E-09 | 0.88 |
| 29958 | 339477  | 339874  | 2.72E-10 | 0.87 |
| 29958 | 341442  | 341750  | 3.71E-64 | 0.95 |
| 29958 | 350026  | 350228  | 2.22E-22 | 0.95 |
| 29958 | 359790  | 360181  | 2.97E-18 | 0.95 |
| 29958 | 389792  | 390139  | 1.31E-06 | 0.95 |
| 29958 | 400514  | 401445  | 4.59E-35 | 0.88 |
| 29958 | 408795  | 409063  | 4.38E-17 | 0.94 |
| 29958 | 467688  | 468210  | 6.43E-21 | 0.86 |
| 29958 | 468729  | 469180  | 1.35E-26 | 0.86 |
| 29958 | 469417  | 470735  | 5.71E-52 | 0.82 |
| 29958 | 487637  | 488037  | 1.85E-35 | 0.98 |
| 29958 | 490901  | 491132  | 2.48E-23 | 0.98 |
| 29958 | 502999  | 503696  | 1.73E-14 | 0.9  |
| 29958 | 532299  | 532687  | 7.54E-23 | 0.97 |
| 29958 | 566943  | 567215  | 8.97E-14 | 0.94 |
| 29958 | 685903  | 686397  | 1.10E-10 | 0.98 |
| 29958 | 850471  | 850745  | 2.02E-07 | 0.89 |
| 29958 | 858211  | 858926  | 2.54E-36 | 0.9  |
| 29958 | 859185  | 859803  | 2.56E-50 | 0.95 |
| 29958 | 860036  | 860491  | 1.01E-36 | 0.92 |
| 29958 | 925371  | 925640  | 3.71E-25 | 0.93 |
| 29958 | 932925  | 933585  | 1.08E-39 | 0.72 |
| 29958 | 990118  | 990797  | 2.06E-11 | 0.69 |
| 29958 | 1001703 | 1002077 | 3.64E-10 | 0.79 |
| 29958 | 1048647 | 1049960 | 5.49E-66 | 0.95 |
| 29958 | 1080670 | 1081082 | 1.86E-49 | 0.96 |
| 29958 | 1122893 | 1123146 | 1.01E-20 | 0.85 |
| 29958 | 1162842 | 1163458 | 2.38E-14 | 0.96 |
| 29958 | 1172795 | 1173734 | 2.12E-31 | 0.91 |
| 29958 | 1174010 | 1174556 | 1.86E-52 | 0.93 |
| 29958 | 1225839 | 1226210 | 1.83E-14 | 0.88 |
| 29958 | 1260865 | 1261171 | 1.53E-45 | 0.93 |
| 29958 | 1267551 | 1268249 | 6.95E-91 | 0.93 |
| 29958 | 1277729 | 1278065 | 1.18E-06 | 0.82 |
| 29958 | 1295375 | 1295601 | 2.47E-04 | 0.85 |
| 29958 | 1346189 | 1346438 | 1.01E-03 | 0.78 |
| 29958 | 1445824 | 1446201 | 1.19E-05 | 1    |
| 29959 | 13493   | 13746   | 1.01E-20 | 0.87 |

|       |        |        |          |      |
|-------|--------|--------|----------|------|
| 29960 | 17586  | 18074  | 4.98E-10 | 0.82 |
| 29960 | 25150  | 25577  | 3.75E-37 | 0.92 |
| 29960 | 25908  | 26497  | 1.67E-58 | 0.89 |
| 29960 | 53015  | 53651  | 3.89E-09 | 0.97 |
| 29960 | 54995  | 55670  | 1.09E-93 | 0.89 |
| 29960 | 93785  | 94135  | 6.63E-06 | 0.85 |
| 29962 | 3368   | 3593   | 1.10E-06 | 1    |
| 29962 | 6662   | 6893   | 2.76E-31 | 0.95 |
| 29962 | 25045  | 25853  | 6.27E-54 | 0.9  |
| 29962 | 30175  | 32249  | 7.55E-81 | 0.85 |
| 29962 | 42044  | 43082  | 1.62E-95 | 0.74 |
| 29962 | 43303  | 43870  | 3.62E-56 | 0.92 |
| 29963 | 18374  | 18764  | 3.90E-06 | 0.88 |
| 29963 | 82565  | 83088  | 3.14E-11 | 0.94 |
| 29963 | 116762 | 117008 | 1.03E-09 | 0.86 |
| 29963 | 118471 | 118743 | 3.76E-05 | 0.92 |
| 29963 | 139715 | 139989 | 1.22E-13 | 0.86 |
| 29963 | 140219 | 140484 | 7.19E-15 | 0.78 |
| 29963 | 159752 | 160053 | 4.66E-06 | 0.89 |
| 29963 | 225622 | 226249 | 7.07E-12 | 0.87 |
| 29963 | 236579 | 236831 | 2.11E-06 | 0.83 |
| 29963 | 237242 | 237551 | 4.13E-06 | 0.9  |
| 29964 | 25694  | 26034  | 3.52E-35 | 0.94 |
| 29964 | 33986  | 34200  | 3.61E-09 | 0.78 |
| 29964 | 41545  | 42181  | 2.29E-41 | 0.72 |
| 29964 | 42526  | 43592  | 1.75E-44 | 0.74 |
| 29964 | 49965  | 50719  | 5.36E-52 | 0.92 |
| 29964 | 50930  | 51418  | 8.68E-65 | 0.96 |
| 29964 | 51637  | 52208  | 1.47E-53 | 0.91 |
| 29964 | 52907  | 53177  | 4.59E-34 | 0.94 |
| 29964 | 53809  | 54347  | 1.07E-33 | 0.73 |
| 29964 | 59792  | 60463  | 3.64E-33 | 0.87 |
| 29964 | 61850  | 62862  | 2.15E-72 | 0.89 |
| 29964 | 81462  | 81995  | 2.61E-25 | 0.95 |
| 29964 | 83692  | 84077  | 5.02E-20 | 0.95 |
| 29964 | 98934  | 99234  | 6.60E-20 | 0.85 |
| 29964 | 101424 | 102233 | 3.77E-31 | 0.8  |
| 29964 | 102775 | 103322 | 4.10E-21 | 0.87 |
| 29964 | 103803 | 104422 | 2.17E-44 | 0.84 |
| 29964 | 111253 | 111798 | 1.10E-47 | 0.95 |
| 29964 | 113801 | 114201 | 1.70E-11 | 0.81 |
| 29964 | 138343 | 138984 | 6.64E-30 | 0.89 |
| 29965 | 6322   | 6763   | 4.35E-08 | 0.83 |
| 29966 | 48100  | 48636  | 1.84E-53 | 0.96 |
| 29966 | 50255  | 51016  | 1.15E-56 | 0.92 |
| 29966 | 51960  | 52315  | 3.43E-21 | 0.95 |
| 29966 | 56099  | 56979  | 1.16E-33 | 0.81 |
| 29966 | 90538  | 91045  | 4.54E-16 | 0.67 |
| 29966 | 94836  | 95403  | 6.34E-38 | 0.95 |
| 29966 | 96086  | 96380  | 4.19E-09 | 0.88 |
| 29966 | 106095 | 106544 | 9.08E-19 | 0.88 |
| 29966 | 121782 | 122117 | 5.39E-21 | 0.92 |
| 29966 | 123132 | 124028 | 1.59E-49 | 0.89 |

|       |        |        |           |      |
|-------|--------|--------|-----------|------|
| 29967 | 651    | 1107   | 1.71E-10  | 0.78 |
| 29967 | 13429  | 13916  | 8.31E-29  | 0.87 |
| 29967 | 26900  | 27334  | 1.48E-43  | 0.95 |
| 29967 | 31237  | 32051  | 1.96E-45  | 0.75 |
| 29967 | 41591  | 41901  | 7.67E-27  | 0.93 |
| 29967 | 42193  | 42786  | 7.02E-30  | 0.83 |
| 29967 | 58823  | 59171  | 3.66E-07  | 0.71 |
| 29967 | 69160  | 69586  | 1.86E-19  | 0.63 |
| 29968 | 11640  | 12888  | 1.54E-65  | 0.76 |
| 29968 | 95601  | 96690  | 1.07E-28  | 0.77 |
| 29968 | 104111 | 104448 | 4.38E-22  | 0.65 |
| 29968 | 110393 | 112588 | 8.47E-169 | 0.92 |
| 29968 | 122226 | 122928 | 2.26E-61  | 0.92 |
| 29968 | 123438 | 124085 | 1.43E-18  | 0.8  |
| 29968 | 129949 | 130330 | 4.45E-21  | 0.75 |
| 29968 | 164745 | 164948 | 4.92E-09  | 0.6  |
| 29968 | 177665 | 178161 | 3.05E-27  | 0.86 |
| 29968 | 178862 | 179223 | 1.18E-19  | 0.79 |
| 29968 | 181436 | 181775 | 1.59E-09  | 0.8  |
| 29968 | 203885 | 206090 | 9.70E-91  | 0.67 |
| 29968 | 257701 | 258839 | 2.11E-53  | 0.76 |
| 29968 | 266148 | 266629 | 9.08E-09  | 0.75 |
| 29968 | 272337 | 272547 | 3.13E-18  | 0.75 |
| 29968 | 272779 | 273310 | 5.33E-19  | 0.85 |
| 29968 | 275598 | 275800 | 2.05E-19  | 0.85 |
| 29968 | 286329 | 286777 | 2.36E-09  | 0.91 |
| 29969 | 2700   | 3211   | 5.34E-09  | 0.6  |
| 29969 | 105441 | 106172 | 4.39E-17  | 0.77 |
| 29969 | 112476 | 112914 | 7.54E-35  | 0.93 |
| 29969 | 134319 | 134998 | 6.76E-34  | 0.87 |
| 29970 | 12715  | 13124  | 2.64E-54  | 0.76 |
| 29970 | 45560  | 46393  | 2.17E-48  | 0.8  |
| 29970 | 47843  | 48092  | 9.20E-11  | 0.88 |
| 29970 | 59877  | 60161  | 7.95E-07  | 0.75 |
| 29970 | 60170  | 60496  | 2.38E-11  | 0.83 |
| 29970 | 60903  | 61538  | 4.31E-30  | 0.79 |
| 29970 | 88691  | 89022  | 5.13E-13  | 0.66 |
| 29970 | 147158 | 147491 | 2.26E-17  | 0.75 |
| 29970 | 147867 | 148429 | 4.84E-29  | 0.89 |
| 29970 | 152508 | 152785 | 3.19E-27  | 0.86 |
| 29970 | 160323 | 161070 | 8.62E-17  | 0.78 |
| 29970 | 250510 | 250973 | 5.49E-31  | 0.96 |
| 29970 | 251298 | 251609 | 2.72E-43  | 0.97 |
| 29970 | 257182 | 257467 | 5.56E-10  | 0.8  |
| 29970 | 314845 | 315230 | 1.84E-24  | 0.61 |
| 29970 | 325610 | 326781 | 6.77E-88  | 0.89 |
| 29970 | 339592 | 340079 | 6.96E-52  | 0.85 |
| 29970 | 340428 | 340819 | 5.48E-58  | 0.84 |
| 29970 | 345307 | 345765 | 8.72E-44  | 0.84 |
| 29970 | 347643 | 348552 | 3.39E-36  | 0.79 |
| 29970 | 366508 | 366908 | 8.45E-31  | 0.75 |
| 29970 | 367956 | 368389 | 2.78E-18  | 0.86 |
| 29970 | 389297 | 389791 | 2.57E-36  | 0.95 |

|       |        |        |           |      |
|-------|--------|--------|-----------|------|
| 29970 | 390177 | 390869 | 2.90E-35  | 0.84 |
| 29970 | 394094 | 394307 | 8.52E-16  | 0.87 |
| 29970 | 409161 | 409762 | 1.27E-55  | 0.85 |
| 29970 | 441838 | 442327 | 5.24E-07  | 0.75 |
| 29970 | 443492 | 443822 | 1.06E-08  | 0.96 |
| 29971 | 1090   | 1362   | 4.55E-07  | 0.89 |
| 29971 | 5284   | 5594   | 3.27E-12  | 0.83 |
| 29971 | 55369  | 55742  | 1.66E-12  | 0.95 |
| 29971 | 128456 | 128876 | 1.90E-11  | 0.91 |
| 29971 | 132555 | 132874 | 9.73E-15  | 0.96 |
| 29971 | 146320 | 146878 | 2.84E-07  | 0.91 |
| 29971 | 151257 | 151551 | 3.03E-03  | 0.82 |
| 29971 | 155520 | 155753 | 1.91E-12  | 0.78 |
| 29971 | 170407 | 170639 | 2.25E-136 | 0.91 |
| 29971 | 197021 | 197675 | 1.14E-05  | 0.87 |
| 29971 | 197731 | 197932 | 5.74E-09  | 0.88 |
| 29971 | 232585 | 232813 | 3.44E-05  | 0.86 |
| 29971 | 232738 | 232961 | 4.77E-08  | 0.88 |
| 29971 | 253349 | 253701 | 3.10E-06  | 0.8  |
| 29971 | 272189 | 272478 | 2.56E-06  | 0.78 |
| 29973 | 34032  | 34253  | 2.34E-09  | 0.7  |
| 29973 | 46164  | 46868  | 1.48E-21  | 0.92 |
| 29973 | 71765  | 72654  | 2.85E-109 | 0.9  |
| 29973 | 88757  | 89543  | 7.46E-26  | 0.83 |
| 29973 | 93318  | 93889  | 2.28E-53  | 0.78 |
| 29973 | 100818 | 101691 | 3.69E-81  | 0.79 |
| 29973 | 114355 | 114763 | 1.36E-08  | 0.97 |
| 29973 | 140381 | 141301 | 8.29E-40  | 0.61 |
| 29973 | 142118 | 142434 | 2.57E-46  | 0.93 |
| 29973 | 150216 | 150447 | 1.91E-44  | 0.81 |
| 29973 | 181804 | 182203 | 1.11E-14  | 0.83 |
| 29973 | 196831 | 197250 | 2.01E-36  | 0.86 |
| 29973 | 202854 | 203427 | 8.20E-33  | 0.97 |
| 29973 | 205114 | 206000 | 2.36E-49  | 0.97 |
| 29973 | 208416 | 208751 | 6.85E-21  | 0.89 |
| 29974 | 63364  | 64036  | 7.01E-32  | 0.85 |
| 29974 | 68421  | 68894  | 1.59E-30  | 0.71 |
| 29974 | 69214  | 69714  | 4.28E-41  | 0.84 |
| 29974 | 74040  | 74727  | 6.32E-32  | 0.95 |
| 29974 | 121187 | 121523 | 2.28E-32  | 0.72 |
| 29975 | 7342   | 7563   | 1.53E-04  | 0.91 |
| 29975 | 43646  | 43981  | 9.06E-19  | 0.84 |
| 29975 | 62046  | 62263  | 2.98E-09  | 0.78 |
| 29975 | 63852  | 64062  | 3.61E-06  | 0.84 |
| 29975 | 97184  | 97487  | 3.74E-17  | 0.88 |
| 29975 | 110905 | 111236 | 2.72E-12  | 0.9  |
| 29975 | 123447 | 123971 | 5.59E-07  | 0.85 |
| 29975 | 170395 | 170715 | 4.96E-09  | 0.81 |
| 29975 | 185737 | 186348 | 6.09E-17  | 0.77 |
| 29975 | 220373 | 220843 | 4.08E-10  | 0.85 |
| 29975 | 273780 | 274032 | 7.63E-09  | 0.81 |
| 29975 | 321480 | 321804 | 3.74E-05  | 0.95 |
| 29975 | 379894 | 381265 | 1.88E-61  | 0.74 |

|       |        |        |           |      |
|-------|--------|--------|-----------|------|
| 29975 | 384431 | 386258 | 3.37E-130 | 0.8  |
| 29975 | 491713 | 491978 | 1.03E-03  | 0.87 |
| 29975 | 540086 | 540320 | 7.46E-12  | 0.88 |
| 29975 | 560157 | 560531 | 6.60E-04  | 0.88 |
| 29975 | 579683 | 580131 | 1.69E-07  | 0.91 |
| 29975 | 631632 | 631861 | 1.81E-06  | 0.77 |
| 29975 | 657596 | 658528 | 2.24E-09  | 0.79 |
| 29975 | 666619 | 668428 | 8.09E-87  | 0.8  |
| 29975 | 668692 | 670283 | 3.32E-62  | 0.86 |
| 29975 | 680675 | 681510 | 7.73E-91  | 0.93 |
| 29975 | 685480 | 685709 | 9.39E-16  | 0.9  |
| 29975 | 686219 | 686723 | 1.18E-16  | 0.93 |
| 29975 | 722706 | 723394 | 1.38E-10  | 0.97 |
| 29975 | 724722 | 725187 | 7.01E-12  | 0.96 |
| 29976 | 26379  | 27736  | 1.28E-113 | 0.94 |
| 29976 | 50139  | 50341  | 3.39E-18  | 0.91 |
| 29976 | 95610  | 96138  | 2.74E-38  | 0.97 |
| 29976 | 122422 | 122681 | 1.29E-17  | 0.95 |
| 29976 | 146055 | 148063 | 7.87E-104 | 0.95 |
| 29976 | 174434 | 174704 | 4.12E-24  | 0.97 |
| 29976 | 174909 | 175299 | 7.42E-17  | 0.94 |
| 29976 | 197174 | 198870 | 3.46E-118 | 0.95 |
| 29976 | 210873 | 211812 | 1.24E-39  | 0.91 |
| 29976 | 212753 | 212985 | 1.81E-22  | 0.87 |
| 29976 | 213239 | 214185 | 2.98E-34  | 0.76 |
| 29976 | 214394 | 214672 | 2.37E-38  | 0.91 |
| 29976 | 215457 | 216605 | 2.74E-23  | 0.6  |
| 29976 | 240563 | 241528 | 2.68E-35  | 0.94 |
| 29976 | 242483 | 243096 | 5.48E-08  | 0.8  |
| 29976 | 261603 | 262046 | 4.24E-12  | 0.72 |
| 29976 | 266021 | 266445 | 5.96E-118 | 0.95 |
| 29976 | 309205 | 309589 | 1.15E-66  | 0.97 |
| 29976 | 309935 | 310315 | 2.89E-70  | 0.96 |
| 29976 | 324950 | 325496 | 8.57E-78  | 0.95 |
| 29976 | 357389 | 358094 | 1.01E-25  | 0.7  |
| 29976 | 385020 | 385582 | 4.62E-87  | 0.95 |
| 29976 | 386016 | 386364 | 3.42E-19  | 0.88 |
| 29976 | 388056 | 388919 | 8.64E-108 | 0.64 |
| 29976 | 406140 | 406458 | 1.20E-33  | 0.94 |
| 29976 | 450359 | 450794 | 9.33E-26  | 0.83 |
| 29976 | 455681 | 458977 | 1.24E-121 | 0.83 |
| 29976 | 464293 | 466506 | 4.39E-138 | 0.81 |
| 29976 | 478751 | 479236 | 3.29E-30  | 0.95 |
| 29976 | 492637 | 493234 | 8.71E-18  | 0.89 |
| 29977 | 1532   | 1740   | 6.08E-09  | 0.84 |
| 29977 | 22601  | 22991  | 2.20E-18  | 0.88 |
| 29977 | 23515  | 24187  | 2.33E-67  | 0.83 |
| 29977 | 46147  | 46939  | 8.23E-32  | 0.78 |
| 29977 | 69989  | 70543  | 2.29E-74  | 0.79 |
| 29977 | 71144  | 72021  | 6.97E-37  | 0.81 |
| 29977 | 83974  | 84271  | 2.62E-19  | 0.73 |
| 29977 | 93953  | 94559  | 1.72E-29  | 0.68 |
| 29980 | 11303  | 11934  | 1.28E-84  | 0.9  |



|       |        |        |           |      |
|-------|--------|--------|-----------|------|
| 29980 | 72507  | 73170  | 7.35E-64  | 0.85 |
| 29980 | 89657  | 90362  | 1.05E-32  | 0.88 |
| 29980 | 110075 | 110391 | 4.81E-18  | 0.86 |
| 29980 | 111797 | 112195 | 2.84E-10  | 0.81 |
| 29980 | 124541 | 124847 | 1.94E-17  | 0.78 |
| 29980 | 125219 | 125496 | 3.10E-29  | 0.81 |
| 29980 | 126093 | 126413 | 2.10E-37  | 0.96 |
| 29980 | 146629 | 146879 | 2.34E-27  | 0.89 |
| 29981 | 62594  | 62899  | 1.70E-12  | 0.8  |
| 29981 | 74588  | 74825  | 1.33E-27  | 0.87 |
| 29981 | 75260  | 76012  | 7.70E-47  | 0.86 |
| 29981 | 76922  | 77225  | 2.57E-35  | 0.96 |
| 29981 | 119698 | 119929 | 3.35E-07  | 0.8  |
| 29981 | 122535 | 123449 | 1.72E-17  | 0.66 |
| 29981 | 162379 | 163703 | 1.31E-36  | 0.66 |
| 29981 | 172054 | 172487 | 8.55E-10  | 0.85 |
| 29981 | 172393 | 172842 | 2.05E-09  | 0.94 |
| 29981 | 183138 | 183977 | 3.97E-62  | 0.82 |
| 29981 | 184407 | 184730 | 1.17E-34  | 0.88 |
| 29981 | 185397 | 186617 | 4.12E-112 | 0.92 |
| 29981 | 187650 | 189080 | 1.70E-34  | 0.7  |
| 29981 | 189622 | 189894 | 8.06E-35  | 0.82 |
| 29981 | 210509 | 211084 | 8.70E-18  | 0.79 |
| 29981 | 212857 | 213129 | 3.51E-27  | 0.88 |
| 29981 | 221940 | 222227 | 9.93E-23  | 0.92 |
| 29981 | 248191 | 248664 | 4.51E-41  | 0.88 |
| 29981 | 248982 | 249747 | 6.15E-29  | 0.71 |
| 29982 | 33770  | 34202  | 3.99E-09  | 0.82 |
| 29982 | 37529  | 39583  | 1.54E-177 | 0.94 |
| 29982 | 48032  | 48432  | 1.55E-36  | 0.8  |
| 29982 | 49015  | 49270  | 1.17E-21  | 0.9  |
| 29982 | 49502  | 50194  | 1.53E-28  | 0.91 |
| 29983 | 2608   | 3305   | 1.91E-48  | 0.86 |
| 29983 | 14551  | 14794  | 6.56E-63  | 0.89 |
| 29983 | 18378  | 18872  | 1.56E-105 | 0.78 |
| 29983 | 34327  | 34536  | 7.26E-15  | 0.78 |
| 29983 | 72687  | 73365  | 7.12E-50  | 0.82 |
| 29983 | 87373  | 87771  | 1.43E-11  | 0.81 |
| 29983 | 88084  | 88896  | 2.63E-54  | 0.87 |
| 29983 | 95720  | 96492  | 3.15E-33  | 0.87 |
| 29983 | 100408 | 100714 | 1.32E-09  | 0.75 |
| 29983 | 120598 | 120892 | 2.43E-19  | 0.9  |
| 29983 | 121472 | 122467 | 1.34E-27  | 0.8  |
| 29983 | 151533 | 151916 | 3.43E-12  | 0.81 |
| 29983 | 154031 | 154466 | 2.63E-28  | 0.92 |
| 29983 | 155165 | 155408 | 2.71E-21  | 0.86 |
| 29983 | 155612 | 155873 | 2.35E-15  | 0.71 |
| 29983 | 165380 | 166038 | 2.70E-16  | 0.7  |
| 29983 | 168556 | 168789 | 5.67E-11  | 0.67 |
| 29983 | 191684 | 192400 | 3.81E-37  | 0.74 |
| 29983 | 200836 | 201818 | 3.30E-35  | 0.79 |
| 29983 | 202408 | 204732 | 1.33E-115 | 0.9  |
| 29983 | 253616 | 254191 | 3.64E-21  | 0.72 |

|       |        |        |           |      |
|-------|--------|--------|-----------|------|
| 29983 | 254786 | 255692 | 2.69E-65  | 0.87 |
| 29983 | 297756 | 298044 | 6.94E-51  | 0.93 |
| 29983 | 298357 | 298783 | 1.83E-31  | 0.74 |
| 29983 | 306606 | 307350 | 2.52E-08  | 0.91 |
| 29983 | 313710 | 314042 | 1.19E-06  | 0.89 |
| 29983 | 318182 | 318435 | 6.68E-27  | 0.87 |
| 29983 | 325995 | 326714 | 1.16E-61  | 0.87 |
| 29983 | 333103 | 333534 | 2.77E-19  | 0.82 |
| 29983 | 338064 | 338979 | 6.12E-84  | 0.9  |
| 29983 | 339587 | 340277 | 6.22E-25  | 0.81 |
| 29983 | 344778 | 346098 | 1.24E-59  | 0.65 |
| 29983 | 355815 | 356618 | 3.12E-24  | 0.71 |
| 29983 | 371925 | 373025 | 2.89E-80  | 0.88 |
| 29983 | 373260 | 374540 | 1.05E-60  | 0.84 |
| 29983 | 430426 | 431983 | 3.29E-78  | 0.89 |
| 29983 | 434153 | 434986 | 1.42E-37  | 0.87 |
| 29983 | 439055 | 439567 | 1.53E-16  | 0.7  |
| 29983 | 458532 | 458801 | 4.14E-15  | 0.89 |
| 29983 | 478259 | 478533 | 2.49E-33  | 0.8  |
| 29983 | 478816 | 479089 | 3.78E-14  | 0.86 |
| 29983 | 485558 | 485779 | 4.48E-13  | 0.7  |
| 29983 | 486049 | 486774 | 1.65E-45  | 0.84 |
| 29983 | 514546 | 515353 | 2.83E-34  | 0.82 |
| 29983 | 517062 | 517405 | 1.72E-18  | 0.8  |
| 29983 | 525776 | 526725 | 1.63E-77  | 0.86 |
| 29983 | 526980 | 530117 | 6.29E-165 | 0.82 |
| 29983 | 549892 | 550441 | 1.04E-90  | 0.84 |
| 29983 | 569325 | 572225 | 2.62E-99  | 0.66 |
| 29983 | 598291 | 599436 | 3.14E-38  | 0.64 |
| 29983 | 607190 | 607743 | 1.86E-35  | 0.89 |
| 29983 | 633930 | 634599 | 1.76E-17  | 0.87 |
| 29983 | 634951 | 635396 | 2.37E-37  | 0.93 |
| 29983 | 645187 | 645495 | 8.79E-12  | 0.73 |
| 29983 | 648637 | 649529 | 6.90E-39  | 0.83 |
| 29983 | 701475 | 702382 | 4.76E-36  | 0.83 |
| 29983 | 714740 | 715195 | 8.23E-23  | 0.68 |
| 29983 | 732897 | 733232 | 2.36E-10  | 0.73 |
| 29983 | 769786 | 771805 | 4.23E-181 | 0.79 |
| 29983 | 772013 | 772361 | 9.94E-19  | 0.69 |
| 29983 | 775001 | 775255 | 4.80E-13  | 0.8  |
| 29983 | 814401 | 814883 | 1.43E-35  | 0.85 |
| 29983 | 819926 | 820327 | 8.65E-21  | 0.9  |
| 29983 | 825605 | 825844 | 5.00E-28  | 0.88 |
| 29983 | 827135 | 827734 | 3.86E-35  | 0.78 |
| 29983 | 855633 | 855979 | 9.19E-17  | 0.76 |
| 29983 | 856789 | 857381 | 3.40E-20  | 0.78 |
| 29983 | 862574 | 862910 | 2.03E-27  | 0.7  |
| 29983 | 863478 | 864035 | 4.38E-32  | 0.8  |
| 29983 | 879911 | 880575 | 5.89E-12  | 0.71 |
| 29983 | 886663 | 887385 | 8.29E-27  | 0.79 |
| 29983 | 887664 | 888224 | 1.93E-35  | 0.83 |
| 29983 | 899888 | 901334 | 1.32E-60  | 0.63 |
| 29983 | 917903 | 918667 | 6.98E-49  | 0.9  |

|       |         |         |          |      |
|-------|---------|---------|----------|------|
| 29983 | 925840  | 926346  | 4.50E-15 | 0.8  |
| 29983 | 938152  | 938593  | 1.44E-06 | 0.65 |
| 29983 | 974715  | 975407  | 2.82E-24 | 0.83 |
| 29983 | 975759  | 975963  | 1.30E-13 | 0.86 |
| 29983 | 995084  | 995721  | 3.36E-21 | 0.65 |
| 29983 | 998219  | 998577  | 6.37E-15 | 0.9  |
| 29983 | 1003992 | 1004581 | 5.27E-38 | 0.86 |
| 29983 | 1007209 | 1008681 | 1.99E-53 | 0.68 |
| 29983 | 1022673 | 1022925 | 2.61E-29 | 0.87 |
| 29983 | 1030700 | 1031859 | 1.47E-57 | 0.74 |
| 29983 | 1032473 | 1033649 | 2.59E-80 | 0.83 |
| 29983 | 1035118 | 1035873 | 2.65E-32 | 0.63 |
| 29983 | 1044311 | 1044600 | 4.19E-22 | 0.84 |
| 29983 | 1063182 | 1063499 | 2.23E-18 | 0.98 |
| 29983 | 1065468 | 1065808 | 1.22E-19 | 0.88 |
| 29983 | 1078451 | 1079572 | 7.14E-71 | 0.89 |
| 29983 | 1100537 | 1100761 | 1.84E-11 | 0.83 |
| 29983 | 1105876 | 1106156 | 3.37E-11 | 0.79 |
| 29983 | 1122037 | 1122290 | 1.06E-07 | 0.81 |
| 29983 | 1124459 | 1124728 | 8.32E-09 | 0.76 |
| 29983 | 1127604 | 1127845 | 8.53E-30 | 0.9  |
| 29983 | 1137497 | 1137762 | 1.45E-08 | 0.78 |
| 29984 | 120307  | 120949  | 1.53E-10 | 0.85 |
| 29984 | 166853  | 167123  | 5.15E-11 | 0.78 |
| 29984 | 181025  | 181429  | 4.50E-08 | 0.93 |
| 29984 | 210297  | 211340  | 1.45E-15 | 0.87 |
| 29984 | 217796  | 218018  | 2.33E-07 | 0.92 |
| 29984 | 256120  | 256332  | 6.17E-06 | 1    |
| 29985 | 8829    | 9063    | 4.32E-06 | 0.92 |
| 29986 | 4874    | 5136    | 3.24E-21 | 0.81 |
| 29986 | 5467    | 6137    | 2.27E-37 | 0.79 |
| 29986 | 6442    | 8245    | 2.46E-57 | 0.82 |
| 29986 | 23359   | 23653   | 3.79E-08 | 0.8  |
| 29986 | 26601   | 27719   | 2.63E-22 | 0.83 |
| 29986 | 28289   | 28735   | 6.05E-14 | 0.71 |
| 29986 | 31006   | 31324   | 7.35E-12 | 0.79 |
| 29986 | 56396   | 56635   | 1.10E-18 | 0.88 |
| 29986 | 62919   | 63343   | 8.87E-25 | 0.8  |
| 29986 | 108959  | 109360  | 1.24E-13 | 0.78 |
| 29986 | 148518  | 148915  | 7.86E-20 | 0.7  |
| 29986 | 149258  | 149553  | 9.41E-29 | 0.96 |
| 29986 | 149893  | 150553  | 1.23E-67 | 0.89 |
| 29986 | 151179  | 151455  | 3.90E-18 | 0.83 |
| 29986 | 172249  | 172619  | 1.92E-21 | 0.81 |
| 29986 | 231752  | 232368  | 9.16E-29 | 0.92 |
| 29986 | 232606  | 233250  | 1.54E-24 | 0.8  |
| 29986 | 237559  | 237844  | 1.01E-26 | 0.8  |
| 29986 | 247517  | 247767  | 6.84E-20 | 0.86 |
| 29986 | 251381  | 252128  | 2.71E-25 | 0.68 |
| 29986 | 252645  | 252972  | 2.51E-18 | 0.92 |
| 29986 | 254773  | 255190  | 5.45E-26 | 0.98 |
| 29986 | 258854  | 259196  | 3.87E-23 | 0.84 |
| 29986 | 259428  | 259886  | 7.39E-20 | 0.7  |

|       |        |        |           |      |
|-------|--------|--------|-----------|------|
| 29986 | 306025 | 306656 | 2.27E-30  | 0.89 |
| 29986 | 312811 | 313473 | 2.15E-36  | 0.64 |
| 29986 | 341504 | 342899 | 1.03E-50  | 0.8  |
| 29986 | 344492 | 344787 | 2.43E-19  | 0.89 |
| 29986 | 349783 | 350124 | 3.18E-10  | 0.88 |
| 29986 | 350360 | 350898 | 1.46E-51  | 0.97 |
| 29986 | 365815 | 366243 | 3.20E-54  | 0.88 |
| 29986 | 366468 | 366813 | 2.77E-36  | 0.9  |
| 29986 | 367029 | 367430 | 8.42E-80  | 0.92 |
| 29986 | 367654 | 368301 | 7.84E-41  | 0.68 |
| 29986 | 401945 | 402292 | 7.79E-21  | 0.72 |
| 29986 | 434009 | 435098 | 9.62E-66  | 0.87 |
| 29986 | 436315 | 437912 | 1.37E-106 | 0.88 |
| 29986 | 438397 | 438803 | 2.63E-25  | 0.87 |
| 29986 | 471157 | 471592 | 3.28E-30  | 0.83 |
| 29986 | 505901 | 506614 | 5.10E-21  | 0.82 |
| 29986 | 529129 | 531502 | 2.40E-276 | 0.89 |
| 29986 | 541051 | 541263 | 3.91E-22  | 0.75 |
| 29987 | 75171  | 75412  | 1.06E-07  | 0.87 |
| 29987 | 152867 | 153215 | 4.96E-07  | 1    |
| 29987 | 153451 | 153957 | 1.19E-16  | 0.85 |
| 29988 | 10980  | 11348  | 1.35E-17  | 0.83 |
| 29988 | 66710  | 67127  | 5.10E-32  | 0.83 |
| 29989 | 1104   | 1484   | 3.68E-53  | 0.87 |
| 29989 | 6401   | 6799   | 4.52E-42  | 0.81 |
| 29989 | 21048  | 21270  | 8.65E-11  | 0.73 |
| 29989 | 33673  | 34882  | 5.73E-51  | 0.74 |
| 29989 | 49461  | 50010  | 1.57E-66  | 0.95 |
| 29989 | 56263  | 56926  | 8.01E-26  | 0.84 |
| 29989 | 57023  | 57227  | 7.72E-20  | 0.89 |
| 29989 | 72684  | 72916  | 2.28E-21  | 0.87 |
| 29989 | 101910 | 102546 | 4.34E-24  | 0.75 |
| 29989 | 110187 | 110920 | 1.03E-14  | 0.74 |
| 29989 | 138754 | 140437 | 1.03E-123 | 0.92 |
| 29989 | 163886 | 164565 | 2.74E-41  | 0.78 |
| 29989 | 188623 | 189298 | 4.81E-45  | 0.82 |
| 29989 | 189658 | 190029 | 5.50E-17  | 0.78 |
| 29989 | 243527 | 243917 | 5.54E-34  | 0.85 |
| 29989 | 258269 | 258584 | 4.32E-31  | 0.93 |
| 29989 | 260613 | 260969 | 5.82E-11  | 0.81 |
| 29990 | 25200  | 25605  | 4.29E-21  | 0.87 |
| 29990 | 26833  | 27134  | 5.27E-23  | 0.94 |
| 29990 | 43229  | 43455  | 8.87E-24  | 0.93 |
| 29990 | 44855  | 45308  | 3.15E-14  | 0.83 |
| 29990 | 70229  | 71107  | 1.83E-41  | 0.89 |
| 29990 | 87922  | 88289  | 9.24E-34  | 0.92 |
| 29990 | 92778  | 93144  | 1.69E-09  | 0.8  |
| 29990 | 100061 | 100483 | 1.22E-06  | 0.85 |
| 29990 | 116971 | 117562 | 1.10E-12  | 0.65 |
| 29990 | 142438 | 142823 | 6.77E-36  | 0.89 |
| 29990 | 150748 | 151208 | 1.14E-38  | 0.77 |
| 29990 | 229208 | 229755 | 3.12E-24  | 0.8  |
| 29990 | 229977 | 230285 | 9.14E-23  | 0.88 |

|       |        |        |           |      |
|-------|--------|--------|-----------|------|
| 29990 | 231546 | 232548 | 7.29E-57  | 0.89 |
| 29990 | 234837 | 235368 | 1.33E-26  | 0.85 |
| 29990 | 235611 | 236342 | 4.02E-44  | 0.88 |
| 29990 | 266064 | 266428 | 1.01E-10  | 0.68 |
| 29990 | 268410 | 269858 | 6.14E-65  | 0.94 |
| 29990 | 272117 | 272592 | 5.64E-11  | 0.68 |
| 29991 | 8367   | 8581   | 1.74E-21  | 0.82 |
| 29991 | 9527   | 10123  | 4.48E-49  | 0.95 |
| 29991 | 15218  | 15675  | 1.65E-27  | 0.8  |
| 29991 | 20038  | 20660  | 8.61E-31  | 0.65 |
| 29991 | 20991  | 21202  | 1.19E-17  | 0.69 |
| 29991 | 36769  | 36999  | 5.46E-38  | 0.95 |
| 29991 | 47190  | 47635  | 1.21E-40  | 0.82 |
| 29991 | 48594  | 49237  | 1.08E-26  | 0.62 |
| 29991 | 81200  | 81539  | 7.29E-27  | 0.77 |
| 29991 | 89441  | 90009  | 1.89E-32  | 0.76 |
| 29991 | 102136 | 104074 | 1.68E-90  | 0.84 |
| 29991 | 105021 | 106139 | 4.29E-45  | 0.85 |
| 29991 | 107262 | 107767 | 1.05E-39  | 0.82 |
| 29991 | 110234 | 111719 | 5.70E-64  | 0.77 |
| 29991 | 161755 | 162247 | 2.62E-34  | 0.61 |
| 29991 | 191857 | 192430 | 1.85E-31  | 0.77 |
| 29991 | 205110 | 205613 | 2.78E-52  | 0.65 |
| 29991 | 209600 | 210110 | 8.96E-15  | 0.76 |
| 29991 | 210530 | 211723 | 3.92E-47  | 0.8  |
| 29991 | 211965 | 213804 | 1.57E-70  | 0.88 |
| 29991 | 214366 | 214697 | 1.53E-24  | 0.93 |
| 29991 | 215015 | 215491 | 7.40E-42  | 0.73 |
| 29991 | 294577 | 295245 | 2.51E-10  | 0.6  |
| 29991 | 303790 | 304848 | 2.34E-58  | 0.87 |
| 29992 | 311    | 876    | 4.16E-16  | 0.77 |
| 29992 | 528    | 952    | 1.36E-18  | 0.84 |
| 29992 | 11527  | 11806  | 9.83E-04  | 0.83 |
| 29992 | 24457  | 24662  | 7.55E-14  | 0.95 |
| 29992 | 33776  | 34168  | 8.86E-51  | 0.94 |
| 29992 | 39620  | 40050  | 1.15E-42  | 0.95 |
| 29992 | 45236  | 45568  | 2.31E-31  | 0.88 |
| 29992 | 52379  | 53056  | 4.20E-35  | 0.77 |
| 29992 | 55083  | 55668  | 5.75E-27  | 0.86 |
| 29992 | 56783  | 58603  | 1.38E-99  | 0.88 |
| 29992 | 60731  | 61021  | 4.32E-20  | 0.88 |
| 29992 | 64304  | 64629  | 1.23E-17  | 0.76 |
| 29992 | 82606  | 82822  | 2.56E-15  | 0.83 |
| 29992 | 83544  | 83916  | 1.13E-15  | 0.7  |
| 29992 | 98440  | 100382 | 4.65E-172 | 0.95 |
| 29992 | 137331 | 137736 | 6.21E-52  | 0.94 |
| 29992 | 140084 | 141397 | 5.46E-48  | 0.92 |
| 29992 | 141639 | 142176 | 1.57E-89  | 0.92 |
| 29992 | 142597 | 142934 | 2.99E-59  | 0.94 |
| 29992 | 144270 | 144702 | 6.68E-32  | 0.91 |
| 29992 | 164957 | 165236 | 5.03E-56  | 0.95 |
| 29992 | 171127 | 171921 | 1.14E-106 | 0.93 |
| 29992 | 172390 | 172708 | 1.04E-26  | 0.81 |

|       |        |        |           |      |
|-------|--------|--------|-----------|------|
| 29992 | 197740 | 198471 | 1.03E-27  | 0.89 |
| 29992 | 206645 | 207081 | 1.12E-50  | 0.92 |
| 29992 | 213896 | 214477 | 2.40E-95  | 0.95 |
| 29992 | 217134 | 217915 | 6.02E-21  | 0.86 |
| 29992 | 218545 | 218764 | 6.23E-25  | 0.9  |
| 29992 | 222271 | 222893 | 1.06E-38  | 0.88 |
| 29992 | 307612 | 307956 | 4.02E-13  | 0.84 |
| 29992 | 336048 | 336513 | 8.52E-38  | 0.94 |
| 29992 | 348599 | 348808 | 4.73E-37  | 0.94 |
| 29992 | 349482 | 349763 | 1.20E-30  | 0.98 |
| 29992 | 360381 | 360953 | 4.77E-15  | 0.79 |
| 29992 | 402489 | 402803 | 9.31E-07  | 0.71 |
| 29992 | 410893 | 411492 | 7.72E-25  | 0.98 |
| 29992 | 412997 | 413425 | 1.42E-17  | 0.88 |
| 29992 | 418744 | 419206 | 7.33E-44  | 0.94 |
| 29992 | 437545 | 437997 | 1.42E-10  | 0.82 |
| 29992 | 450811 | 451440 | 4.24E-22  | 0.89 |
| 29992 | 465935 | 466279 | 2.02E-44  | 0.92 |
| 29992 | 468833 | 469473 | 4.64E-35  | 0.9  |
| 29992 | 471610 | 472056 | 1.18E-48  | 0.96 |
| 29992 | 473586 | 473841 | 2.93E-26  | 0.93 |
| 29992 | 475539 | 475946 | 4.78E-28  | 0.94 |
| 29992 | 477596 | 477965 | 2.02E-34  | 0.72 |
| 29992 | 478299 | 478561 | 1.59E-29  | 0.74 |
| 29992 | 484892 | 485189 | 2.40E-07  | 0.8  |
| 29992 | 501609 | 502064 | 4.06E-21  | 0.92 |
| 29992 | 515418 | 515980 | 5.76E-43  | 0.93 |
| 29992 | 540982 | 541649 | 4.11E-47  | 0.92 |
| 29992 | 543028 | 543266 | 1.33E-24  | 0.92 |
| 29992 | 556760 | 557270 | 8.69E-14  | 0.84 |
| 29992 | 557698 | 558068 | 2.53E-21  | 0.94 |
| 29992 | 566408 | 566767 | 3.95E-10  | 0.84 |
| 29992 | 600622 | 600942 | 4.15E-11  | 0.75 |
| 29992 | 638453 | 639174 | 1.25E-26  | 0.8  |
| 29992 | 658168 | 658531 | 2.29E-16  | 0.93 |
| 29992 | 659858 | 660219 | 4.62E-21  | 0.88 |
| 29992 | 669593 | 670412 | 4.90E-104 | 0.95 |
| 29992 | 679502 | 679720 | 3.24E-05  | 0.93 |
| 29992 | 681198 | 681560 | 1.84E-19  | 0.89 |
| 29992 | 682170 | 682836 | 2.43E-62  | 0.97 |
| 29992 | 707282 | 707623 | 1.43E-06  | 1    |
| 29992 | 711104 | 711608 | 5.52E-11  | 0.9  |
| 29992 | 715657 | 717299 | 1.29E-69  | 0.82 |
| 29992 | 718164 | 718517 | 1.01E-27  | 0.97 |
| 29992 | 719319 | 719882 | 8.92E-62  | 0.92 |
| 29992 | 720702 | 720930 | 6.55E-40  | 0.96 |
| 29992 | 721526 | 722079 | 5.83E-39  | 0.9  |
| 29992 | 723421 | 723651 | 6.67E-17  | 0.85 |
| 29992 | 724066 | 725010 | 9.15E-60  | 0.74 |
| 29992 | 725482 | 725787 | 2.64E-17  | 0.86 |
| 29992 | 726141 | 726688 | 2.23E-16  | 0.78 |
| 29992 | 728463 | 729012 | 8.52E-70  | 0.79 |
| 29992 | 729484 | 729838 | 3.15E-31  | 0.96 |

|       |         |         |           |      |
|-------|---------|---------|-----------|------|
| 29992 | 731298  | 731596  | 1.85E-11  | 0.78 |
| 29992 | 736273  | 736851  | 1.61E-36  | 0.95 |
| 29992 | 771869  | 772101  | 1.94E-19  | 0.73 |
| 29992 | 772486  | 773028  | 1.98E-49  | 0.93 |
| 29992 | 780817  | 781218  | 9.45E-28  | 0.99 |
| 29992 | 799550  | 799961  | 1.30E-03  | 0.85 |
| 29992 | 808422  | 808696  | 5.40E-09  | 0.94 |
| 29992 | 852511  | 852899  | 1.88E-34  | 0.91 |
| 29992 | 853675  | 853895  | 2.39E-12  | 0.8  |
| 29992 | 854460  | 854970  | 2.07E-41  | 0.83 |
| 29992 | 856344  | 856835  | 7.39E-38  | 0.93 |
| 29992 | 872583  | 872855  | 1.97E-96  | 0.94 |
| 29992 | 900738  | 901014  | 9.31E-12  | 0.92 |
| 29992 | 904264  | 904612  | 1.47E-26  | 0.9  |
| 29992 | 1009628 | 1010486 | 2.10E-49  | 0.94 |
| 29992 | 1010433 | 1011037 | 1.16E-05  | 0.77 |
| 29992 | 1027970 | 1028640 | 2.34E-38  | 0.75 |
| 29992 | 1028846 | 1029161 | 3.34E-14  | 0.79 |
| 29992 | 1030988 | 1031288 | 8.86E-34  | 0.76 |
| 29992 | 1035813 | 1036109 | 2.94E-92  | 0.94 |
| 29992 | 1067854 | 1069485 | 9.59E-104 | 0.93 |
| 29992 | 1076823 | 1077450 | 1.18E-17  | 0.72 |
| 29992 | 1079280 | 1079990 | 5.52E-40  | 0.83 |
| 29992 | 1192592 | 1193495 | 6.62E-27  | 0.72 |
| 29992 | 1193739 | 1194138 | 5.95E-48  | 0.93 |
| 29992 | 1195636 | 1196107 | 4.71E-27  | 0.64 |
| 29992 | 1196408 | 1196929 | 1.13E-85  | 0.85 |
| 29992 | 1199682 | 1199887 | 4.32E-36  | 0.92 |
| 29992 | 1217289 | 1217520 | 1.92E-15  | 0.84 |
| 29992 | 1224647 | 1224890 | 6.68E-07  | 0.8  |
| 29992 | 1264327 | 1264680 | 4.12E-14  | 0.7  |
| 29992 | 1338161 | 1338578 | 2.44E-18  | 0.8  |
| 29992 | 1338809 | 1339016 | 3.25E-36  | 0.88 |
| 29993 | 19475   | 20161   | 1.52E-67  | 0.83 |
| 29993 | 20968   | 21203   | 8.40E-85  | 0.93 |
| 29993 | 22431   | 22890   | 3.38E-28  | 0.86 |
| 29993 | 23549   | 23984   | 1.15E-40  | 0.87 |
| 29993 | 24569   | 25075   | 1.26E-15  | 0.61 |
| 29993 | 25606   | 26278   | 1.77E-57  | 0.94 |
| 29993 | 29030   | 29706   | 1.07E-21  | 0.91 |
| 29993 | 51925   | 52290   | 1.68E-08  | 1    |
| 29993 | 61072   | 61309   | 1.00E-18  | 0.95 |
| 29993 | 88630   | 88919   | 2.88E-13  | 0.79 |
| 29993 | 92483   | 92809   | 8.87E-27  | 0.81 |
| 29993 | 95757   | 96171   | 1.13E-19  | 0.89 |
| 29993 | 127450  | 128267  | 9.74E-65  | 0.81 |
| 29993 | 128558  | 129343  | 3.95E-57  | 0.86 |
| 29993 | 130589  | 131180  | 1.67E-28  | 0.76 |
| 29993 | 149969  | 150839  | 1.11E-86  | 0.83 |
| 29993 | 159154  | 159629  | 1.83E-15  | 0.8  |
| 29993 | 171288  | 171554  | 1.92E-10  | 0.87 |
| 29993 | 184614  | 185123  | 3.51E-39  | 0.92 |
| 29993 | 237977  | 238259  | 7.35E-18  | 0.89 |

|       |        |        |           |      |
|-------|--------|--------|-----------|------|
| 29993 | 304139 | 304836 | 1.59E-51  | 0.93 |
| 29993 | 305103 | 305374 | 8.91E-27  | 0.94 |
| 29993 | 306082 | 307033 | 1.45E-29  | 0.82 |
| 29993 | 321056 | 321437 | 3.93E-38  | 0.9  |
| 29993 | 339044 | 339557 | 3.62E-15  | 0.81 |
| 29993 | 350130 | 350374 | 3.69E-15  | 0.93 |
| 29993 | 464246 | 464650 | 9.74E-44  | 0.89 |
| 29993 | 464861 | 465233 | 2.30E-14  | 0.93 |
| 29993 | 480170 | 481106 | 3.14E-36  | 0.78 |
| 29993 | 498578 | 499012 | 9.61E-11  | 0.84 |
| 29993 | 511912 | 512269 | 1.77E-09  | 0.94 |
| 29993 | 536908 | 537225 | 2.83E-09  | 0.77 |
| 29993 | 548768 | 549331 | 1.71E-08  | 0.65 |
| 29993 | 555715 | 556678 | 1.06E-32  | 0.77 |
| 29993 | 556994 | 557359 | 2.39E-06  | 0.83 |
| 29993 | 563446 | 563774 | 6.08E-75  | 0.88 |
| 29993 | 564765 | 565466 | 8.66E-50  | 0.89 |
| 29993 | 577913 | 578697 | 9.14E-35  | 0.8  |
| 29993 | 581565 | 582501 | 1.38E-41  | 0.86 |
| 29993 | 583365 | 583953 | 2.37E-32  | 0.87 |
| 29993 | 587374 | 587725 | 4.46E-21  | 0.87 |
| 29993 | 644573 | 644968 | 8.48E-53  | 0.7  |
| 29993 | 652746 | 653210 | 5.79E-55  | 0.92 |
| 29993 | 653438 | 653734 | 7.18E-09  | 0.85 |
| 29993 | 654902 | 655968 | 1.32E-56  | 0.95 |
| 29993 | 682230 | 682667 | 9.62E-25  | 0.69 |
| 29993 | 683241 | 683801 | 7.85E-37  | 0.8  |
| 29993 | 695241 | 695736 | 6.45E-56  | 0.95 |
| 29993 | 697191 | 697470 | 3.79E-51  | 0.95 |
| 29993 | 699326 | 701029 | 2.84E-203 | 0.93 |
| 29993 | 707255 | 707582 | 2.67E-10  | 0.8  |
| 29993 | 712602 | 713174 | 8.43E-48  | 0.78 |
| 29993 | 713776 | 714134 | 5.08E-22  | 0.85 |
| 29993 | 714588 | 715136 | 1.56E-31  | 0.84 |
| 29993 | 718124 | 718861 | 7.99E-26  | 0.9  |
| 29993 | 721598 | 722478 | 9.99E-30  | 0.62 |
| 29993 | 726796 | 727440 | 8.81E-65  | 0.95 |
| 29993 | 735470 | 736008 | 5.25E-15  | 0.82 |
| 29993 | 754290 | 755851 | 5.08E-130 | 0.88 |
| 29993 | 759697 | 760367 | 2.63E-50  | 0.95 |
| 29993 | 760688 | 761043 | 1.47E-34  | 0.97 |
| 29993 | 762034 | 763225 | 6.27E-74  | 0.76 |
| 29993 | 769500 | 769963 | 1.16E-22  | 0.79 |
| 29993 | 775049 | 775743 | 4.28E-14  | 0.75 |
| 29993 | 784008 | 784869 | 1.18E-24  | 0.82 |
| 29994 | 25745  | 26821  | 6.96E-38  | 0.77 |
| 29994 | 54324  | 54894  | 1.43E-16  | 0.67 |
| 29994 | 59597  | 60019  | 7.48E-37  | 0.76 |
| 29994 | 61547  | 61766  | 3.15E-31  | 0.89 |
| 29994 | 110418 | 110760 | 1.59E-29  | 0.79 |
| 29994 | 111254 | 111555 | 4.87E-22  | 0.81 |
| 29994 | 116304 | 116826 | 4.71E-28  | 0.86 |
| 29994 | 117537 | 118000 | 7.75E-65  | 0.92 |



|       |        |        |          |      |
|-------|--------|--------|----------|------|
| 29994 | 118950 | 119757 | 7.52E-23 | 0.61 |
| 29994 | 129999 | 130217 | 2.51E-06 | 1    |
| 29994 | 150115 | 150741 | 1.41E-23 | 0.89 |
| 29994 | 151110 | 151519 | 1.62E-14 | 0.83 |
| 29994 | 154794 | 155188 | 9.71E-28 | 0.92 |
| 29994 | 158882 | 159110 | 7.34E-20 | 0.91 |
| 29994 | 160164 | 160608 | 5.27E-25 | 0.85 |
| 29994 | 178237 | 178489 | 3.88E-10 | 0.8  |
| 29994 | 178485 | 179342 | 1.68E-60 | 0.94 |
| 29994 | 198452 | 198794 | 3.87E-11 | 0.84 |
| 29994 | 217798 | 218351 | 5.92E-14 | 0.63 |
| 29994 | 219611 | 220357 | 8.78E-72 | 0.81 |
| 29994 | 244445 | 244830 | 4.56E-24 | 0.78 |
| 29994 | 248787 | 249722 | 7.59E-36 | 0.7  |
| 29994 | 250994 | 251387 | 2.26E-18 | 0.78 |
| 29994 | 252582 | 252996 | 1.19E-11 | 0.78 |
| 29994 | 252641 | 253015 | 2.18E-11 | 0.8  |
| 29994 | 257318 | 258130 | 1.09E-57 | 0.8  |
| 29996 | 14314  | 14769  | 6.22E-11 | 0.73 |
| 29996 | 31035  | 31687  | 5.89E-18 | 0.67 |
| 29996 | 54670  | 54931  | 1.52E-13 | 0.78 |
| 29996 | 59110  | 59431  | 5.86E-23 | 0.7  |
| 29996 | 59647  | 59916  | 1.14E-18 | 0.76 |
| 29996 | 61471  | 62214  | 4.44E-25 | 0.72 |
| 29997 | 8092   | 8334   | 1.43E-05 | 0.88 |
| 29997 | 47594  | 47825  | 5.29E-07 | 0.88 |
| 29997 | 86417  | 86846  | 1.43E-04 | 0.83 |
| 29997 | 200692 | 200956 | 2.08E-06 | 0.87 |
| 29997 | 210217 | 210627 | 7.35E-17 | 0.9  |
| 29997 | 218090 | 218380 | 4.34E-25 | 0.94 |
| 29997 | 229574 | 229993 | 9.28E-08 | 0.8  |
| 29997 | 238701 | 239189 | 4.63E-16 | 0.83 |
| 29997 | 279751 | 280194 | 8.43E-07 | 0.92 |
| 29997 | 281856 | 282232 | 1.09E-07 | 0.78 |
| 29997 | 315956 | 316620 | 5.75E-06 | 0.97 |
| 29997 | 335112 | 335459 | 1.37E-05 | 0.82 |
| 29997 | 357868 | 358462 | 1.42E-13 | 0.8  |
| 29997 | 433947 | 434534 | 8.15E-61 | 0.93 |
| 29997 | 465069 | 465770 | 6.51E-08 | 0.72 |
| 29997 | 468975 | 469363 | 3.24E-08 | 0.79 |
| 29997 | 496191 | 496422 | 1.88E-15 | 0.96 |
| 29997 | 519221 | 519481 | 1.09E-07 | 0.87 |
| 29997 | 560750 | 561186 | 4.03E-05 | 0.85 |
| 29997 | 613279 | 613627 | 1.70E-05 | 0.77 |
| 29997 | 614724 | 615425 | 2.74E-09 | 0.92 |
| 29997 | 627270 | 627626 | 4.08E-06 | 1    |
| 29997 | 662074 | 662302 | 3.71E-12 | 0.92 |
| 29997 | 674236 | 674583 | 1.95E-02 | 0.81 |
| 29997 | 684784 | 685148 | 3.58E-09 | 0.92 |
| 29997 | 687583 | 687938 | 1.78E-06 | 0.86 |
| 29997 | 712600 | 712838 | 8.57E-21 | 0.92 |
| 29998 | 17101  | 17544  | 1.79E-05 | 0.83 |
| 29998 | 46579  | 47016  | 4.14E-05 | 0.86 |

|       |        |        |           |      |
|-------|--------|--------|-----------|------|
| 29999 | 59464  | 60055  | 1.55E-22  | 0.8  |
| 29999 | 67353  | 68404  | 1.27E-64  | 0.92 |
| 29999 | 79822  | 80512  | 1.90E-63  | 0.92 |
| 29999 | 113281 | 113887 | 4.88E-16  | 0.77 |
| 29999 | 146775 | 147111 | 7.12E-28  | 0.67 |
| 29999 | 148596 | 149406 | 4.33E-39  | 0.92 |
| 30000 | 5940   | 6251   | 1.71E-13  | 0.85 |
| 30000 | 7998   | 8845   | 2.40E-117 | 0.77 |
| 30000 | 11038  | 11464  | 1.93E-28  | 0.87 |
| 30000 | 12211  | 12699  | 2.24E-16  | 0.86 |
| 30000 | 15231  | 15726  | 2.83E-34  | 0.82 |
| 30000 | 22263  | 22834  | 3.85E-13  | 0.67 |
| 30000 | 24386  | 25069  | 5.53E-27  | 0.89 |
| 30000 | 33054  | 33383  | 1.61E-15  | 0.71 |
| 30000 | 38022  | 39157  | 5.53E-44  | 0.87 |
| 30000 | 51279  | 51802  | 1.23E-37  | 0.67 |
| 30000 | 55387  | 55941  | 7.94E-31  | 0.88 |
| 30000 | 56936  | 57818  | 1.96E-60  | 0.92 |
| 30000 | 58121  | 59371  | 1.06E-41  | 0.83 |
| 30000 | 60426  | 60745  | 1.50E-14  | 0.81 |
| 30000 | 111728 | 112105 | 6.26E-55  | 0.92 |
| 30000 | 115198 | 115528 | 1.33E-25  | 0.62 |
| 30000 | 121417 | 121880 | 6.84E-49  | 0.92 |
| 30000 | 129438 | 129888 | 3.44E-37  | 0.97 |
| 30000 | 131054 | 131707 | 1.72E-24  | 0.91 |
| 30000 | 170823 | 171400 | 4.86E-35  | 0.81 |
| 30000 | 172586 | 172987 | 2.31E-19  | 0.71 |
| 30000 | 190594 | 191062 | 1.14E-13  | 0.86 |
| 30001 | 2275   | 2766   | 4.27E-59  | 0.96 |
| 30001 | 3170   | 3460   | 8.16E-27  | 0.91 |
| 30001 | 3790   | 4401   | 5.08E-106 | 0.9  |
| 30001 | 5586   | 6089   | 3.53E-59  | 0.96 |
| 30001 | 6319   | 6716   | 9.65E-12  | 0.71 |
| 30002 | 1127   | 1435   | 1.94E-07  | 0.94 |
| 30002 | 46622  | 46850  | 2.41E-03  | 0.81 |
| 30002 | 52728  | 52941  | 2.16E-07  | 0.93 |
| 30002 | 53545  | 53756  | 9.41E-10  | 0.89 |
| 30002 | 71379  | 71689  | 6.89E-05  | 0.78 |
| 30003 | 21024  | 21834  | 1.09E-56  | 0.67 |
| 30003 | 56327  | 57818  | 1.32E-63  | 0.68 |
| 30003 | 66771  | 67154  | 1.17E-08  | 0.73 |
| 30003 | 73254  | 73678  | 1.13E-15  | 0.73 |
| 30003 | 73979  | 74200  | 3.77E-44  | 0.95 |
| 30003 | 78002  | 78595  | 2.35E-09  | 0.69 |
| 30003 | 140233 | 140575 | 3.28E-09  | 0.87 |
| 30003 | 143298 | 144223 | 9.80E-95  | 0.71 |
| 30003 | 160314 | 161246 | 1.05E-71  | 0.93 |
| 30003 | 166462 | 167078 | 2.99E-47  | 0.93 |
| 30004 | 9810   | 10036  | 1.47E-05  | 0.92 |
| 30004 | 31856  | 32227  | 9.79E-13  | 0.84 |
| 30004 | 150723 | 150977 | 2.23E-26  | 0.91 |
| 30004 | 256214 | 256751 | 1.50E-14  | 0.78 |
| 30004 | 256367 | 256920 | 3.01E-12  | 0.76 |

|       |        |        |           |      |
|-------|--------|--------|-----------|------|
| 30004 | 293591 | 294102 | 2.13E-18  | 0.93 |
| 30004 | 321437 | 321896 | 1.42E-10  | 0.72 |
| 30004 | 526068 | 526382 | 1.41E-30  | 0.81 |
| 30004 | 533088 | 533527 | 1.80E-17  | 0.68 |
| 30004 | 625662 | 625934 | 4.14E-04  | 0.94 |
| 30004 | 636353 | 636704 | 2.87E-25  | 0.94 |
| 30004 | 698899 | 699153 | 1.21E-34  | 0.83 |
| 30004 | 757483 | 758560 | 1.85E-63  | 0.9  |
| 30004 | 758996 | 759361 | 8.74E-38  | 0.97 |
| 30004 | 759887 | 760119 | 4.94E-26  | 0.92 |
| 30005 | 12889  | 13451  | 8.29E-18  | 0.76 |
| 30005 | 30820  | 31620  | 1.12E-57  | 0.86 |
| 30005 | 44281  | 44562  | 4.24E-14  | 0.75 |
| 30005 | 45280  | 46460  | 1.04E-49  | 0.89 |
| 30005 | 48163  | 49347  | 1.86E-87  | 0.62 |
| 30005 | 57735  | 58157  | 1.46E-11  | 0.61 |
| 30005 | 62798  | 64632  | 3.24E-102 | 0.87 |
| 30005 | 86823  | 87681  | 3.79E-26  | 0.79 |
| 30005 | 89581  | 90700  | 4.73E-53  | 0.85 |
| 30005 | 99675  | 100711 | 1.77E-43  | 0.76 |
| 30005 | 113280 | 113523 | 6.48E-40  | 0.95 |
| 30005 | 120290 | 121261 | 1.57E-23  | 0.6  |
| 30005 | 127859 | 128267 | 8.98E-21  | 0.86 |
| 30005 | 129593 | 132393 | 1.41E-120 | 0.84 |
| 30005 | 133032 | 133558 | 2.01E-40  | 0.61 |
| 30005 | 147590 | 147826 | 1.16E-26  | 0.8  |
| 30005 | 160498 | 161203 | 2.72E-29  | 0.71 |
| 30005 | 161612 | 162002 | 1.62E-21  | 0.8  |
| 30005 | 162353 | 163532 | 2.63E-89  | 0.78 |
| 30005 | 163742 | 165604 | 9.23E-144 | 0.76 |
| 30005 | 166354 | 167469 | 2.75E-62  | 0.69 |
| 30005 | 184435 | 185763 | 2.06E-27  | 0.78 |
| 30005 | 188736 | 189139 | 3.69E-24  | 0.83 |
| 30005 | 293090 | 293453 | 3.19E-13  | 0.74 |
| 30005 | 296109 | 297030 | 2.33E-71  | 0.81 |
| 30005 | 301939 | 302517 | 2.49E-53  | 0.85 |
| 30005 | 305758 | 306707 | 2.94E-109 | 0.74 |
| 30005 | 311676 | 312385 | 6.46E-21  | 0.79 |
| 30005 | 314297 | 314718 | 2.81E-20  | 0.78 |
| 30005 | 315010 | 315705 | 2.56E-37  | 0.79 |
| 30005 | 320882 | 321123 | 3.57E-07  | 0.71 |
| 30005 | 321351 | 321790 | 3.40E-21  | 0.6  |
| 30005 | 327627 | 328420 | 5.11E-42  | 0.68 |
| 30005 | 362214 | 362969 | 1.45E-83  | 0.88 |
| 30005 | 363385 | 363754 | 2.84E-39  | 0.97 |
| 30005 | 375007 | 375607 | 9.74E-53  | 0.91 |
| 30005 | 400617 | 401402 | 7.32E-22  | 0.82 |
| 30005 | 412777 | 413132 | 7.77E-22  | 0.85 |
| 30005 | 413621 | 414038 | 2.59E-16  | 0.77 |
| 30005 | 443866 | 444216 | 9.41E-07  | 1    |
| 30005 | 451704 | 452526 | 4.56E-34  | 0.83 |
| 30005 | 460341 | 460772 | 3.79E-31  | 0.69 |
| 30005 | 470022 | 470226 | 1.68E-15  | 0.78 |

|       |        |        |           |      |
|-------|--------|--------|-----------|------|
| 30005 | 478878 | 479196 | 1.53E-08  | 0.63 |
| 30006 | 12340  | 12624  | 1.24E-12  | 0.75 |
| 30006 | 25414  | 25945  | 1.76E-18  | 0.88 |
| 30006 | 27579  | 28270  | 1.43E-24  | 0.77 |
| 30006 | 33363  | 33926  | 1.39E-45  | 0.92 |
| 30006 | 34937  | 35171  | 9.11E-20  | 0.94 |
| 30006 | 35731  | 36128  | 5.97E-44  | 0.9  |
| 30006 | 54199  | 54492  | 2.67E-26  | 0.94 |
| 30006 | 64024  | 66082  | 1.06E-78  | 0.76 |
| 30006 | 66326  | 66811  | 4.99E-43  | 0.87 |
| 30006 | 67200  | 67605  | 6.36E-74  | 0.87 |
| 30006 | 89494  | 89880  | 1.45E-09  | 0.77 |
| 30006 | 105661 | 106139 | 8.67E-53  | 0.88 |
| 30006 | 106435 | 107040 | 3.46E-17  | 0.8  |
| 30006 | 113544 | 114180 | 2.36E-21  | 0.85 |
| 30006 | 165971 | 166769 | 8.65E-30  | 0.84 |
| 30006 | 167915 | 168575 | 1.27E-39  | 0.89 |
| 30006 | 169025 | 169592 | 1.44E-61  | 0.96 |
| 30006 | 177842 | 178235 | 4.53E-31  | 0.96 |
| 30006 | 187915 | 188828 | 4.22E-49  | 0.91 |
| 30006 | 189099 | 189369 | 1.68E-26  | 0.88 |
| 30006 | 190352 | 191825 | 1.04E-62  | 0.79 |
| 30006 | 199245 | 199622 | 4.49E-16  | 0.61 |
| 30007 | 7817   | 8090   | 2.39E-04  | 0.87 |
| 30007 | 70277  | 70678  | 2.41E-06  | 0.8  |
| 30007 | 73052  | 73380  | 2.51E-07  | 0.84 |
| 30008 | 2802   | 3439   | 2.96E-24  | 0.73 |
| 30008 | 6027   | 6298   | 1.09E-24  | 0.93 |
| 30008 | 28107  | 28386  | 1.68E-34  | 0.94 |
| 30008 | 33141  | 33868  | 1.94E-45  | 0.85 |
| 30008 | 42522  | 43190  | 2.04E-19  | 0.8  |
| 30008 | 43391  | 43695  | 8.09E-19  | 0.87 |
| 30008 | 60532  | 60840  | 6.63E-15  | 0.82 |
| 30008 | 62321  | 62739  | 5.23E-29  | 0.83 |
| 30008 | 90719  | 91788  | 1.93E-69  | 0.88 |
| 30008 | 92222  | 93005  | 7.77E-104 | 0.89 |
| 30008 | 93457  | 94761  | 1.52E-58  | 0.77 |
| 30008 | 123214 | 123930 | 1.85E-30  | 0.73 |
| 30008 | 129451 | 129957 | 7.40E-17  | 0.71 |
| 30008 | 130575 | 130836 | 6.05E-16  | 0.83 |
| 30008 | 130900 | 131264 | 1.34E-12  | 0.81 |
| 30008 | 155998 | 156348 | 5.85E-15  | 0.8  |
| 30008 | 178906 | 179930 | 1.11E-29  | 0.71 |
| 30008 | 182519 | 183187 | 1.56E-33  | 0.73 |
| 30008 | 196580 | 196802 | 1.43E-10  | 0.83 |
| 30008 | 197399 | 197639 | 1.01E-11  | 0.75 |
| 30009 | 42162  | 42375  | 5.00E-07  | 0.92 |
| 30009 | 49222  | 49422  | 2.19E-08  | 0.85 |
| 30009 | 69440  | 69702  | 4.56E-08  | 0.8  |
| 30009 | 90066  | 90332  | 1.91E-10  | 0.92 |
| 30009 | 107428 | 107654 | 2.09E-08  | 0.82 |
| 30009 | 114562 | 114815 | 1.21E-04  | 0.79 |
| 30009 | 121704 | 121918 | 1.13E-05  | 0.86 |

|       |        |        |           |      |
|-------|--------|--------|-----------|------|
| 30009 | 170582 | 171092 | 5.84E-13  | 0.91 |
| 30009 | 182451 | 182671 | 1.19E-10  | 0.89 |
| 30009 | 245481 | 245768 | 1.77E-15  | 0.83 |
| 30009 | 246673 | 246904 | 2.50E-10  | 0.64 |
| 30009 | 310044 | 310334 | 2.03E-22  | 0.81 |
| 30009 | 313070 | 313416 | 5.20E-32  | 0.93 |
| 30009 | 402150 | 403152 | 6.33E-91  | 0.98 |
| 30009 | 403810 | 404102 | 1.16E-39  | 0.93 |
| 30009 | 452925 | 453408 | 8.32E-28  | 0.86 |
| 30009 | 492354 | 492698 | 6.56E-12  | 0.96 |
| 30009 | 498221 | 499703 | 7.70E-97  | 0.89 |
| 30009 | 500573 | 501062 | 4.30E-31  | 0.86 |
| 30009 | 510170 | 510662 | 2.92E-15  | 0.77 |
| 30009 | 527501 | 527813 | 2.57E-09  | 0.79 |
| 30009 | 529365 | 530091 | 2.03E-38  | 0.85 |
| 30009 | 593347 | 594419 | 2.02E-29  | 0.66 |
| 30009 | 597734 | 598456 | 8.67E-48  | 0.88 |
| 30009 | 604850 | 605092 | 1.65E-23  | 0.87 |
| 30009 | 605939 | 606571 | 1.88E-52  | 0.91 |
| 30009 | 663900 | 664241 | 4.28E-07  | 0.98 |
| 30009 | 719184 | 719416 | 8.96E-07  | 0.81 |
| 30009 | 774344 | 775318 | 7.17E-50  | 0.91 |
| 30009 | 775549 | 775814 | 1.37E-32  | 0.95 |
| 30009 | 776074 | 776341 | 4.47E-35  | 0.87 |
| 30009 | 791699 | 792547 | 1.91E-38  | 0.62 |
| 30009 | 800952 | 801293 | 4.78E-08  | 0.85 |
| 30009 | 802468 | 802766 | 6.59E-31  | 0.89 |
| 30009 | 845849 | 846217 | 3.20E-28  | 0.95 |
| 30009 | 885654 | 886090 | 1.20E-50  | 0.95 |
| 30009 | 895300 | 895977 | 2.35E-44  | 0.86 |
| 30009 | 896741 | 897740 | 4.12E-61  | 0.85 |
| 30009 | 897995 | 898549 | 2.90E-82  | 0.92 |
| 30009 | 900325 | 900749 | 9.96E-40  | 0.61 |
| 30010 | 11386  | 11693  | 1.78E-04  | 0.94 |
| 30010 | 25682  | 26635  | 4.23E-97  | 0.9  |
| 30010 | 79296  | 79748  | 2.14E-16  | 0.95 |
| 30010 | 81257  | 81999  | 6.47E-102 | 0.95 |
| 30010 | 82716  | 82982  | 2.03E-19  | 0.93 |
| 30010 | 91960  | 92502  | 1.53E-07  | 1    |
| 30010 | 107287 | 107578 | 1.70E-25  | 0.73 |
| 30010 | 118065 | 118431 | 6.05E-24  | 0.93 |
| 30010 | 146833 | 147166 | 2.30E-11  | 0.79 |
| 30010 | 148044 | 148361 | 7.83E-48  | 0.88 |
| 30010 | 162665 | 162941 | 2.18E-25  | 0.86 |
| 30010 | 167230 | 168758 | 5.68E-136 | 0.79 |
| 30010 | 169583 | 170854 | 7.10E-60  | 0.89 |
| 30010 | 171416 | 172232 | 3.86E-53  | 0.83 |
| 30010 | 199795 | 200099 | 1.64E-17  | 0.86 |
| 30010 | 204362 | 204616 | 2.40E-05  | 0.74 |
| 30010 | 244219 | 245043 | 9.75E-57  | 0.89 |
| 30010 | 288601 | 289693 | 9.47E-39  | 0.9  |
| 30010 | 290058 | 290377 | 2.37E-21  | 0.96 |
| 30010 | 299541 | 299816 | 4.42E-12  | 0.77 |

|       |        |        |           |      |
|-------|--------|--------|-----------|------|
| 30010 | 302147 | 303124 | 8.76E-40  | 0.82 |
| 30010 | 315621 | 316297 | 2.65E-25  | 0.93 |
| 30010 | 318778 | 319030 | 2.19E-43  | 0.93 |
| 30010 | 319256 | 319822 | 8.79E-28  | 0.77 |
| 30010 | 336402 | 337912 | 2.16E-39  | 0.72 |
| 30010 | 342282 | 342861 | 5.19E-46  | 0.94 |
| 30010 | 372458 | 374187 | 8.58E-100 | 0.85 |
| 30010 | 380006 | 380563 | 2.01E-17  | 0.75 |
| 30010 | 399126 | 399448 | 1.28E-14  | 0.87 |
| 30010 | 404986 | 405568 | 2.01E-20  | 0.85 |
| 30010 | 406924 | 407520 | 2.94E-27  | 0.67 |
| 30010 | 408478 | 408952 | 1.77E-76  | 0.98 |
| 30010 | 409156 | 409630 | 5.54E-84  | 0.95 |
| 30010 | 443792 | 444002 | 5.89E-35  | 0.95 |
| 30010 | 446319 | 447228 | 1.55E-102 | 0.98 |
| 30010 | 451372 | 451738 | 4.97E-08  | 0.73 |
| 30010 | 453353 | 453635 | 5.54E-31  | 0.87 |
| 30010 | 462322 | 462900 | 2.77E-18  | 0.83 |
| 30010 | 476067 | 476741 | 4.74E-42  | 0.9  |
| 30011 | 39023  | 39310  | 2.37E-06  | 0.71 |
| 30012 | 7299   | 7614   | 1.97E-17  | 0.78 |
| 30012 | 8140   | 8603   | 9.05E-49  | 0.9  |
| 30012 | 8908   | 10005  | 7.90E-93  | 0.91 |
| 30012 | 10255  | 10485  | 1.82E-24  | 0.82 |
| 30012 | 24120  | 24739  | 2.23E-07  | 0.94 |
| 30014 | 2029   | 2923   | 6.21E-31  | 0.87 |
| 30014 | 6139   | 6758   | 2.36E-50  | 0.96 |
| 30014 | 95539  | 95979  | 7.70E-09  | 0.8  |
| 30014 | 157968 | 158432 | 1.19E-11  | 0.61 |
| 30014 | 184689 | 184919 | 1.76E-05  | 0.79 |
| 30014 | 250036 | 250605 | 1.21E-13  | 0.62 |
| 30015 | 34018  | 35162  | 8.73E-61  | 0.92 |
| 30015 | 35650  | 36825  | 1.00E-68  | 0.65 |
| 30015 | 37919  | 38371  | 1.19E-50  | 0.87 |
| 30015 | 64033  | 66319  | 3.29E-118 | 0.72 |
| 30015 | 74423  | 74824  | 1.37E-06  | 0.7  |
| 30017 | 34801  | 35067  | 1.43E-08  | 0.88 |
| 30017 | 191250 | 191513 | 1.05E-08  | 0.93 |
| 30017 | 197530 | 197755 | 2.59E-07  | 0.81 |
| 30017 | 293843 | 294251 | 1.20E-06  | 0.96 |
| 30017 | 351841 | 352319 | 1.95E-06  | 0.96 |
| 30017 | 363541 | 363849 | 9.15E-35  | 0.98 |
| 30017 | 366476 | 367979 | 2.40E-62  | 0.93 |
| 30017 | 556653 | 556977 | 3.38E-13  | 0.87 |
| 30018 | 90814  | 91138  | 2.69E-04  | 0.75 |
| 30018 | 92926  | 93159  | 2.77E-04  | 0.82 |
| 30018 | 194194 | 194400 | 2.60E-05  | 0.76 |
| 30018 | 196094 | 196506 | 2.35E-07  | 0.78 |
| 30018 | 196824 | 197584 | 6.90E-07  | 0.85 |
| 30018 | 237181 | 237497 | 1.04E-25  | 0.97 |
| 30018 | 259340 | 260043 | 2.44E-29  | 0.78 |
| 30018 | 298588 | 299056 | 1.34E-29  | 0.82 |
| 30018 | 301900 | 302513 | 8.31E-18  | 0.82 |

|       |        |        |           |      |
|-------|--------|--------|-----------|------|
| 30018 | 301971 | 302524 | 1.56E-17  | 0.81 |
| 30018 | 309154 | 309592 | 7.65E-20  | 0.8  |
| 30018 | 321524 | 321918 | 1.64E-31  | 0.91 |
| 30018 | 323245 | 323720 | 1.00E-23  | 0.94 |
| 30018 | 331102 | 332070 | 1.58E-63  | 0.96 |
| 30018 | 334131 | 334463 | 1.50E-23  | 0.94 |
| 30018 | 344381 | 344809 | 1.58E-42  | 0.94 |
| 30018 | 346666 | 346976 | 2.51E-49  | 0.93 |
| 30018 | 357748 | 358169 | 1.22E-25  | 0.95 |
| 30018 | 361639 | 362247 | 1.94E-34  | 0.9  |
| 30018 | 370018 | 370603 | 6.25E-18  | 0.82 |
| 30018 | 425316 | 425579 | 1.15E-11  | 0.66 |
| 30018 | 446652 | 446927 | 5.44E-06  | 0.85 |
| 30018 | 466661 | 467041 | 1.82E-18  | 0.88 |
| 30018 | 475527 | 475835 | 1.03E-24  | 0.75 |
| 30018 | 510077 | 510619 | 7.57E-21  | 0.93 |
| 30018 | 521298 | 521760 | 1.65E-24  | 0.89 |
| 30018 | 523410 | 523822 | 3.93E-29  | 0.93 |
| 30018 | 524977 | 525367 | 4.54E-15  | 0.73 |
| 30018 | 525847 | 526231 | 1.55E-13  | 0.81 |
| 30018 | 531485 | 532322 | 5.32E-47  | 0.9  |
| 30018 | 532546 | 533210 | 1.42E-28  | 0.85 |
| 30018 | 533470 | 534945 | 8.31E-99  | 0.92 |
| 30018 | 585810 | 586476 | 9.28E-32  | 0.94 |
| 30018 | 586751 | 587599 | 1.31E-34  | 0.94 |
| 30018 | 587803 | 588205 | 1.09E-38  | 0.83 |
| 30018 | 588642 | 589209 | 2.31E-28  | 0.87 |
| 30018 | 591578 | 591912 | 3.25E-34  | 0.96 |
| 30020 | 20657  | 21425  | 3.59E-48  | 0.82 |
| 30020 | 21710  | 22501  | 1.08E-44  | 0.89 |
| 30020 | 22745  | 22965  | 1.31E-21  | 0.99 |
| 30020 | 30901  | 31274  | 6.72E-33  | 0.86 |
| 30020 | 41429  | 42724  | 9.62E-29  | 0.69 |
| 30020 | 43022  | 43253  | 1.12E-18  | 0.81 |
| 30020 | 55342  | 55801  | 1.11E-13  | 0.79 |
| 30020 | 64119  | 64668  | 6.60E-48  | 0.92 |
| 30020 | 64993  | 65546  | 6.25E-37  | 0.9  |
| 30020 | 70380  | 71582  | 6.44E-42  | 0.64 |
| 30020 | 71890  | 72364  | 2.85E-10  | 0.79 |
| 30020 | 74297  | 75963  | 3.05E-106 | 0.88 |
| 30020 | 93359  | 93934  | 1.00E-47  | 0.93 |
| 30020 | 94316  | 94670  | 5.35E-63  | 0.88 |
| 30020 | 97446  | 98047  | 1.14E-20  | 0.91 |
| 30020 | 107084 | 108388 | 4.30E-52  | 0.73 |
| 30020 | 108692 | 108953 | 2.99E-29  | 0.92 |
| 30021 | 14136  | 14703  | 2.18E-07  | 0.85 |
| 30021 | 24902  | 25119  | 2.42E-28  | 0.96 |
| 30021 | 35561  | 35839  | 1.68E-07  | 0.77 |
| 30021 | 39306  | 39757  | 6.06E-30  | 0.85 |
| 30021 | 40621  | 40990  | 2.36E-31  | 0.88 |
| 30022 | 16216  | 16434  | 4.28E-11  | 0.99 |
| 30022 | 45889  | 46222  | 4.05E-24  | 0.83 |
| 30022 | 103290 | 103606 | 2.14E-11  | 0.93 |

|       |        |        |           |      |
|-------|--------|--------|-----------|------|
| 30022 | 178046 | 178368 | 2.55E-54  | 0.94 |
| 30022 | 250345 | 250665 | 1.60E-12  | 0.84 |
| 30022 | 253772 | 254009 | 1.07E-10  | 0.93 |
| 30022 | 302139 | 302480 | 6.63E-27  | 0.94 |
| 30022 | 320333 | 321000 | 2.65E-70  | 0.94 |
| 30022 | 428758 | 429081 | 5.59E-10  | 0.85 |
| 30022 | 464370 | 464642 | 3.83E-09  | 0.87 |
| 30022 | 472416 | 472672 | 3.71E-04  | 0.85 |
| 30023 | 25358  | 25672  | 1.68E-05  | 0.85 |
| 30023 | 29871  | 30525  | 6.03E-12  | 0.91 |
| 30023 | 31036  | 31340  | 9.88E-10  | 0.94 |
| 30023 | 31887  | 32500  | 7.75E-14  | 0.89 |
| 30023 | 70781  | 71430  | 2.17E-07  | 0.95 |
| 30023 | 82098  | 82310  | 2.07E-06  | 0.81 |
| 30023 | 97370  | 97763  | 5.44E-10  | 0.98 |
| 30024 | 44414  | 45129  | 1.99E-58  | 0.61 |
| 30024 | 83575  | 83914  | 1.63E-22  | 0.94 |
| 30024 | 108708 | 109676 | 7.21E-47  | 0.89 |
| 30024 | 110244 | 110496 | 1.75E-14  | 0.84 |
| 30024 | 111544 | 111987 | 2.24E-42  | 0.95 |
| 30024 | 112856 | 113258 | 3.25E-71  | 0.94 |
| 30024 | 116403 | 116758 | 4.32E-163 | 0.93 |
| 30024 | 179394 | 179976 | 4.41E-27  | 0.84 |
| 30024 | 180880 | 181092 | 6.60E-10  | 0.81 |
| 30024 | 181424 | 182171 | 2.48E-54  | 0.87 |
| 30024 | 186967 | 187471 | 2.61E-12  | 0.81 |
| 30024 | 187961 | 188384 | 1.29E-22  | 0.92 |
| 30024 | 189703 | 190255 | 9.48E-35  | 0.79 |
| 30024 | 195978 | 196998 | 2.62E-39  | 0.86 |
| 30024 | 197305 | 198149 | 1.53E-60  | 0.96 |
| 30024 | 202320 | 202753 | 1.11E-05  | 0.76 |
| 30024 | 236409 | 236636 | 7.14E-05  | 0.87 |
| 30024 | 332698 | 333290 | 1.05E-35  | 0.9  |
| 30024 | 336882 | 337419 | 2.79E-33  | 0.86 |
| 30024 | 371667 | 372169 | 1.00E-58  | 0.97 |
| 30024 | 372742 | 373563 | 3.22E-23  | 0.97 |
| 30024 | 374424 | 374904 | 2.73E-12  | 0.74 |
| 30024 | 407100 | 407707 | 7.83E-09  | 0.92 |
| 30024 | 418115 | 418338 | 5.31E-08  | 0.82 |
| 30024 | 438706 | 439155 | 3.64E-24  | 0.86 |
| 30024 | 440120 | 441490 | 2.31E-59  | 0.62 |
| 30024 | 442056 | 442581 | 6.99E-13  | 0.76 |
| 30024 | 447272 | 448022 | 1.08E-21  | 0.8  |
| 30024 | 452518 | 452930 | 1.18E-46  | 0.96 |
| 30024 | 477569 | 478253 | 4.30E-23  | 0.83 |
| 30024 | 502461 | 502986 | 1.61E-20  | 0.68 |
| 30024 | 533303 | 534057 | 2.02E-15  | 0.81 |
| 30024 | 547956 | 548550 | 1.41E-18  | 0.89 |
| 30024 | 583865 | 584397 | 7.22E-25  | 0.85 |
| 30024 | 586770 | 587011 | 4.60E-72  | 0.98 |
| 30024 | 604004 | 604490 | 7.59E-11  | 0.95 |
| 30024 | 614696 | 614944 | 6.27E-05  | 1    |
| 30024 | 673620 | 674321 | 4.72E-27  | 0.89 |



|       |         |         |           |      |
|-------|---------|---------|-----------|------|
| 30024 | 675193  | 675564  | 4.16E-25  | 0.93 |
| 30024 | 695177  | 695785  | 4.23E-06  | 0.78 |
| 30024 | 703673  | 704009  | 3.16E-11  | 0.91 |
| 30024 | 710026  | 710599  | 2.71E-24  | 0.83 |
| 30024 | 713923  | 714601  | 5.33E-20  | 0.9  |
| 30024 | 726893  | 727503  | 2.82E-46  | 0.96 |
| 30024 | 744242  | 744673  | 4.45E-50  | 0.9  |
| 30024 | 746818  | 747457  | 1.21E-39  | 0.9  |
| 30024 | 753733  | 754463  | 3.61E-40  | 0.93 |
| 30024 | 768377  | 768612  | 1.99E-31  | 0.84 |
| 30024 | 777136  | 777424  | 4.53E-10  | 0.88 |
| 30024 | 777593  | 778041  | 3.85E-10  | 0.84 |
| 30024 | 779704  | 781266  | 1.27E-85  | 0.93 |
| 30024 | 788891  | 789248  | 4.47E-23  | 0.97 |
| 30024 | 871589  | 872378  | 6.78E-26  | 0.68 |
| 30024 | 872882  | 873108  | 9.17E-43  | 0.75 |
| 30024 | 877399  | 877663  | 9.86E-23  | 0.92 |
| 30024 | 878039  | 878637  | 1.15E-126 | 0.94 |
| 30024 | 880258  | 880589  | 1.07E-28  | 0.9  |
| 30024 | 890198  | 890454  | 6.86E-27  | 1    |
| 30024 | 942645  | 943249  | 1.21E-07  | 0.86 |
| 30024 | 966388  | 967174  | 5.97E-30  | 0.85 |
| 30024 | 1026489 | 1027077 | 2.08E-30  | 0.96 |
| 30024 | 1076908 | 1077334 | 7.05E-25  | 0.74 |
| 30024 | 1077619 | 1078197 | 7.65E-35  | 0.84 |
| 30024 | 1079000 | 1080451 | 1.54E-69  | 0.86 |
| 30024 | 1082334 | 1082630 | 1.29E-33  | 0.95 |
| 30024 | 1089165 | 1089599 | 2.60E-40  | 0.76 |
| 30024 | 1090331 | 1090648 | 8.64E-26  | 0.87 |
| 30024 | 1124549 | 1124768 | 1.85E-09  | 0.83 |
| 30024 | 1138464 | 1139183 | 1.02E-13  | 0.69 |
| 30024 | 1148129 | 1149561 | 2.26E-53  | 0.62 |
| 30024 | 1167028 | 1167564 | 6.17E-21  | 0.85 |
| 30024 | 1169677 | 1170105 | 8.82E-28  | 0.91 |
| 30024 | 1209248 | 1210040 | 4.43E-27  | 0.91 |
| 30024 | 1214038 | 1214633 | 1.37E-52  | 0.95 |
| 30024 | 1222715 | 1223056 | 3.27E-16  | 0.88 |
| 30024 | 1228065 | 1228573 | 1.06E-15  | 0.74 |
| 30024 | 1236283 | 1236656 | 1.02E-16  | 0.63 |
| 30024 | 1273528 | 1273747 | 1.07E-11  | 0.83 |
| 30024 | 1290805 | 1291025 | 2.61E-33  | 0.8  |
| 30025 | 9165    | 9490    | 2.26E-12  | 0.91 |
| 30025 | 100120  | 100570  | 8.98E-08  | 0.72 |
| 30025 | 117152  | 117487  | 8.55E-20  | 0.79 |
| 30025 | 143084  | 143571  | 6.14E-12  | 0.79 |
| 30025 | 154708  | 155128  | 3.42E-41  | 0.94 |
| 30025 | 210517  | 210783  | 1.86E-07  | 0.88 |
| 30025 | 284509  | 285460  | 2.62E-40  | 0.72 |
| 30025 | 291714  | 291979  | 2.47E-29  | 0.72 |
| 30026 | 17316   | 17595   | 7.74E-28  | 0.9  |
| 30026 | 21179   | 21419   | 2.07E-17  | 0.8  |
| 30026 | 21868   | 22079   | 5.65E-08  | 0.67 |
| 30026 | 58333   | 58697   | 2.26E-10  | 0.8  |

|       |        |        |           |      |
|-------|--------|--------|-----------|------|
| 30026 | 69444  | 69820  | 3.80E-25  | 0.84 |
| 30026 | 72414  | 72879  | 5.63E-16  | 0.75 |
| 30026 | 73548  | 74346  | 2.88E-29  | 0.79 |
| 30026 | 77214  | 77533  | 1.01E-14  | 0.86 |
| 30026 | 81198  | 81548  | 1.01E-09  | 0.8  |
| 30026 | 81639  | 81896  | 4.01E-21  | 0.79 |
| 30026 | 103949 | 105515 | 3.58E-91  | 0.71 |
| 30026 | 140445 | 141077 | 7.37E-11  | 0.78 |
| 30026 | 185106 | 185575 | 1.72E-12  | 0.88 |
| 30026 | 187816 | 188205 | 2.29E-28  | 0.83 |
| 30026 | 191162 | 191391 | 1.52E-31  | 0.77 |
| 30026 | 192102 | 192622 | 1.53E-74  | 0.85 |
| 30026 | 201813 | 202434 | 2.09E-41  | 0.81 |
| 30026 | 203101 | 204049 | 1.78E-30  | 0.68 |
| 30026 | 229232 | 230338 | 1.45E-126 | 0.62 |
| 30026 | 230663 | 231280 | 7.92E-52  | 0.85 |
| 30026 | 231524 | 231771 | 1.97E-29  | 0.82 |
| 30026 | 256487 | 257345 | 1.67E-42  | 0.88 |
| 30026 | 273989 | 275187 | 4.61E-67  | 0.74 |
| 30026 | 277684 | 278761 | 2.24E-34  | 0.83 |
| 30026 | 297236 | 299222 | 3.01E-148 | 0.87 |
| 30026 | 300853 | 301871 | 2.71E-63  | 0.67 |
| 30026 | 310894 | 311360 | 1.60E-04  | 0.94 |
| 30026 | 404951 | 405192 | 1.32E-10  | 0.8  |
| 30026 | 419968 | 420437 | 3.97E-17  | 0.83 |
| 30026 | 434318 | 434714 | 1.46E-20  | 0.83 |
| 30026 | 435643 | 436984 | 1.21E-91  | 0.9  |
| 30026 | 437269 | 437708 | 3.94E-70  | 0.97 |
| 30026 | 437948 | 438699 | 3.79E-33  | 0.68 |
| 30026 | 482717 | 483154 | 4.61E-16  | 0.87 |
| 30026 | 491395 | 491935 | 2.14E-27  | 0.91 |
| 30026 | 492172 | 492402 | 3.79E-27  | 0.86 |
| 30026 | 508560 | 509506 | 2.05E-29  | 0.91 |
| 30026 | 571417 | 571823 | 1.26E-15  | 0.81 |
| 30026 | 591194 | 591494 | 2.76E-04  | 0.93 |
| 30026 | 617007 | 618611 | 1.36E-79  | 0.76 |
| 30026 | 618954 | 619240 | 3.02E-61  | 0.91 |
| 30026 | 621543 | 622766 | 4.43E-48  | 0.77 |
| 30026 | 623332 | 623819 | 1.13E-28  | 0.69 |
| 30027 | 18390  | 19926  | 2.17E-90  | 0.83 |
| 30027 | 20132  | 21411  | 7.48E-75  | 0.86 |
| 30027 | 23612  | 24508  | 6.80E-134 | 0.92 |
| 30027 | 26850  | 27541  | 3.10E-48  | 0.94 |
| 30027 | 69535  | 69779  | 2.71E-13  | 0.85 |
| 30027 | 76156  | 76459  | 2.79E-17  | 0.92 |
| 30027 | 96008  | 96662  | 9.02E-38  | 0.9  |
| 30027 | 101758 | 102957 | 5.72E-39  | 0.83 |
| 30027 | 106357 | 106858 | 7.40E-17  | 0.79 |
| 30027 | 112705 | 113089 | 3.99E-10  | 0.85 |
| 30027 | 121883 | 122186 | 5.08E-33  | 0.92 |
| 30027 | 122437 | 122897 | 5.36E-32  | 0.96 |
| 30027 | 123256 | 123834 | 6.95E-32  | 0.92 |
| 30027 | 129359 | 129640 | 1.35E-26  | 0.99 |

|       |        |        |           |      |
|-------|--------|--------|-----------|------|
| 30027 | 137025 | 137429 | 4.19E-46  | 0.93 |
| 30027 | 167345 | 167619 | 1.00E-12  | 0.69 |
| 30027 | 186002 | 186744 | 1.85E-30  | 0.77 |
| 30027 | 190758 | 191373 | 1.33E-57  | 0.72 |
| 30027 | 194641 | 195440 | 1.47E-35  | 0.69 |
| 30027 | 198468 | 199206 | 4.25E-22  | 0.65 |
| 30027 | 225209 | 225567 | 3.34E-11  | 0.84 |
| 30027 | 226975 | 227367 | 6.60E-22  | 1    |
| 30027 | 238239 | 238664 | 1.31E-14  | 0.84 |
| 30027 | 253353 | 253811 | 7.80E-29  | 0.7  |
| 30027 | 290190 | 290466 | 6.04E-10  | 0.85 |
| 30027 | 305995 | 307247 | 1.74E-45  | 0.77 |
| 30027 | 308767 | 309084 | 8.80E-28  | 0.83 |
| 30027 | 324205 | 324465 | 2.13E-16  | 0.82 |
| 30027 | 330832 | 331154 | 1.28E-16  | 0.82 |
| 30027 | 332929 | 333336 | 1.37E-28  | 0.94 |
| 30027 | 337945 | 338241 | 7.61E-23  | 0.8  |
| 30027 | 366902 | 367301 | 6.29E-20  | 0.88 |
| 30027 | 374624 | 375830 | 2.70E-53  | 0.86 |
| 30027 | 397379 | 398288 | 3.26E-25  | 0.67 |
| 30028 | 7854   | 8337   | 5.33E-44  | 0.85 |
| 30028 | 12401  | 13371  | 1.48E-41  | 0.64 |
| 30028 | 19154  | 19398  | 8.36E-34  | 0.97 |
| 30028 | 88961  | 89537  | 3.88E-30  | 0.91 |
| 30028 | 90579  | 90915  | 1.01E-30  | 0.96 |
| 30028 | 111283 | 111996 | 8.56E-59  | 0.87 |
| 30028 | 112449 | 113222 | 3.94E-86  | 0.85 |
| 30028 | 115081 | 116960 | 5.17E-119 | 0.77 |
| 30028 | 146478 | 147070 | 3.17E-16  | 0.73 |
| 30028 | 147388 | 147796 | 5.48E-28  | 0.79 |
| 30030 | 43707  | 43960  | 1.17E-05  | 0.8  |
| 30032 | 28996  | 29801  | 1.99E-37  | 0.84 |
| 30032 | 63969  | 65045  | 7.13E-67  | 0.87 |
| 30032 | 65345  | 65789  | 4.60E-30  | 0.79 |
| 30032 | 71705  | 72755  | 6.52E-39  | 0.81 |
| 30032 | 78165  | 78593  | 1.61E-18  | 0.85 |
| 30032 | 79454  | 79980  | 1.73E-40  | 0.78 |
| 30032 | 133457 | 133864 | 3.42E-24  | 0.91 |
| 30032 | 142690 | 144711 | 5.01E-69  | 0.82 |
| 30032 | 148992 | 149957 | 5.07E-20  | 0.66 |
| 30033 | 42494  | 42857  | 9.04E-12  | 0.84 |
| 30033 | 55018  | 55311  | 4.93E-11  | 0.89 |
| 30033 | 59929  | 60235  | 7.83E-19  | 0.91 |
| 30033 | 66338  | 66715  | 4.16E-47  | 0.92 |
| 30033 | 147796 | 148067 | 8.35E-09  | 0.92 |
| 30033 | 150370 | 150584 | 4.02E-05  | 0.86 |
| 30033 | 164292 | 164693 | 4.94E-07  | 0.93 |
| 30033 | 179571 | 179968 | 5.26E-10  | 0.85 |
| 30033 | 185154 | 185418 | 3.38E-06  | 0.9  |
| 30033 | 188232 | 188469 | 3.43E-19  | 0.87 |
| 30033 | 195600 | 195943 | 1.08E-21  | 0.97 |
| 30033 | 196801 | 197489 | 1.45E-60  | 0.95 |
| 30033 | 197730 | 198235 | 5.36E-29  | 0.97 |

|       |        |        |           |      |
|-------|--------|--------|-----------|------|
| 30033 | 241629 | 241969 | 1.42E-21  | 0.92 |
| 30033 | 244428 | 244796 | 1.04E-25  | 0.94 |
| 30033 | 280198 | 281044 | 5.04E-10  | 0.92 |
| 30033 | 355693 | 355905 | 1.28E-10  | 0.98 |
| 30033 | 448248 | 448937 | 3.15E-05  | 0.7  |
| 30033 | 471687 | 472409 | 1.17E-09  | 0.96 |
| 30033 | 635186 | 635554 | 1.73E-10  | 0.98 |
| 30033 | 660462 | 660757 | 1.84E-03  | 0.86 |
| 30033 | 676094 | 676502 | 5.00E-16  | 0.97 |
| 30033 | 696327 | 697032 | 2.35E-04  | 0.84 |
| 30033 | 734460 | 734868 | 6.69E-09  | 0.93 |
| 30033 | 739133 | 739712 | 4.90E-10  | 0.95 |
| 30033 | 765515 | 765752 | 4.23E-07  | 0.9  |
| 30033 | 768703 | 770570 | 1.68E-69  | 0.8  |
| 30034 | 12178  | 12386  | 2.56E-08  | 0.97 |
| 30034 | 31825  | 32065  | 1.70E-09  | 0.9  |
| 30034 | 69359  | 69584  | 1.46E-05  | 0.9  |
| 30034 | 74357  | 74842  | 1.38E-22  | 0.81 |
| 30034 | 91037  | 91650  | 1.43E-11  | 0.84 |
| 30034 | 91652  | 92161  | 9.34E-23  | 0.81 |
| 30034 | 103760 | 104113 | 4.14E-04  | 1    |
| 30034 | 105566 | 105955 | 6.24E-06  | 0.88 |
| 30034 | 106348 | 106615 | 6.14E-12  | 0.8  |
| 30034 | 107451 | 107718 | 2.17E-12  | 0.79 |
| 30034 | 121770 | 122058 | 3.31E-12  | 0.96 |
| 30035 | 33238  | 33471  | 1.28E-07  | 0.86 |
| 30035 | 48226  | 48558  | 4.56E-22  | 0.76 |
| 30035 | 55360  | 55783  | 2.05E-07  | 0.98 |
| 30035 | 60683  | 60893  | 3.26E-17  | 0.8  |
| 30035 | 83153  | 83419  | 7.08E-12  | 0.85 |
| 30035 | 94550  | 94759  | 1.55E-09  | 0.84 |
| 30035 | 96178  | 96439  | 1.74E-04  | 0.79 |
| 30035 | 109726 | 110140 | 2.95E-14  | 0.86 |
| 30035 | 115248 | 115506 | 4.37E-04  | 0.93 |
| 30035 | 150134 | 150406 | 2.28E-04  | 0.93 |
| 30037 | 205649 | 205850 | 3.84E-05  | 0.96 |
| 30037 | 223224 | 223854 | 5.45E-05  | 0.8  |
| 30037 | 229590 | 229955 | 8.23E-22  | 0.93 |
| 30037 | 239154 | 239405 | 4.89E-17  | 0.88 |
| 30037 | 308257 | 308554 | 1.05E-09  | 0.78 |
| 30037 | 322155 | 322397 | 5.99E-07  | 0.94 |
| 30037 | 345054 | 345370 | 5.82E-11  | 0.79 |
| 30037 | 367843 | 368223 | 1.33E-19  | 0.95 |
| 30039 | 18142  | 18994  | 2.23E-29  | 0.68 |
| 30039 | 33231  | 33686  | 4.03E-14  | 0.65 |
| 30039 | 34609  | 34897  | 3.38E-13  | 0.76 |
| 30039 | 70543  | 70901  | 8.51E-16  | 0.8  |
| 30039 | 73725  | 74025  | 3.10E-10  | 0.6  |
| 30039 | 74521  | 75050  | 9.97E-63  | 0.8  |
| 30039 | 75406  | 78330  | 2.92E-140 | 0.77 |
| 30040 | 34370  | 35518  | 9.79E-75  | 0.64 |
| 30040 | 44121  | 45059  | 2.13E-30  | 0.85 |
| 30040 | 49628  | 50441  | 6.29E-38  | 0.62 |

|       |        |        |          |      |
|-------|--------|--------|----------|------|
| 30040 | 52717  | 53550  | 1.10E-64 | 0.86 |
| 30040 | 59443  | 60602  | 1.25E-40 | 0.66 |
| 30040 | 61110  | 61664  | 1.13E-39 | 0.86 |
| 30040 | 83684  | 84994  | 2.60E-67 | 0.81 |
| 30040 | 95180  | 95441  | 4.03E-12 | 0.82 |
| 30040 | 95784  | 97268  | 1.42E-45 | 0.8  |
| 30040 | 112108 | 113070 | 5.87E-59 | 0.91 |
| 30040 | 179176 | 179670 | 2.02E-61 | 0.93 |
| 30040 | 180452 | 181012 | 2.26E-19 | 0.93 |
| 30040 | 198042 | 199643 | 7.47E-95 | 0.89 |
| 30041 | 17601  | 18068  | 5.20E-47 | 0.89 |
| 30041 | 18640  | 18894  | 6.68E-30 | 0.9  |
| 30041 | 20472  | 21139  | 3.13E-30 | 0.71 |
| 30041 | 21376  | 21820  | 2.27E-38 | 0.94 |
| 30041 | 22508  | 23408  | 2.00E-36 | 0.82 |
| 30041 | 33429  | 33854  | 2.28E-22 | 0.79 |
| 30041 | 63579  | 64059  | 4.61E-20 | 0.68 |
| 30041 | 97296  | 97499  | 3.58E-22 | 0.92 |
| 30041 | 103605 | 103920 | 4.39E-09 | 0.8  |
| 30041 | 117351 | 117725 | 3.44E-32 | 0.82 |
| 30041 | 118575 | 119754 | 2.04E-46 | 0.83 |
| 30041 | 154159 | 154590 | 2.07E-22 | 0.94 |
| 30041 | 160983 | 161232 | 6.77E-05 | 1    |
| 30041 | 169080 | 169782 | 4.42E-35 | 0.78 |
| 30042 | 8051   | 8463   | 7.29E-16 | 0.86 |
| 30042 | 26518  | 26885  | 1.56E-20 | 0.72 |
| 30042 | 28324  | 28614  | 4.88E-09 | 0.8  |
| 30042 | 55634  | 56166  | 2.67E-22 | 0.77 |
| 30042 | 56581  | 56818  | 8.51E-22 | 0.63 |
| 30042 | 171431 | 173672 | 1.38E-80 | 0.84 |
| 30042 | 174248 | 174581 | 4.85E-24 | 0.93 |
| 30042 | 175108 | 175977 | 2.14E-26 | 0.62 |
| 30042 | 185657 | 186695 | 1.25E-70 | 0.68 |
| 30042 | 189788 | 190604 | 1.09E-61 | 0.93 |
| 30042 | 195580 | 195852 | 2.39E-10 | 0.72 |
| 30042 | 199144 | 199609 | 2.54E-17 | 0.92 |
| 30042 | 200798 | 201478 | 3.35E-60 | 0.92 |
| 30042 | 204744 | 205316 | 3.82E-27 | 0.88 |
| 30042 | 209147 | 210415 | 1.63E-34 | 0.78 |
| 30042 | 225939 | 226340 | 2.08E-08 | 0.86 |
| 30042 | 234222 | 234827 | 5.22E-22 | 0.95 |
| 30042 | 236365 | 237049 | 3.35E-26 | 0.79 |
| 30042 | 238830 | 239360 | 3.21E-78 | 0.81 |
| 30042 | 239727 | 240312 | 9.75E-61 | 0.91 |
| 30043 | 23255  | 23518  | 6.23E-04 | 0.88 |
| 30043 | 29611  | 29918  | 3.51E-06 | 0.75 |
| 30043 | 31869  | 32625  | 2.03E-22 | 0.85 |
| 30043 | 32936  | 33269  | 4.99E-12 | 0.89 |
| 30043 | 39162  | 39780  | 7.63E-21 | 0.9  |
| 30043 | 44008  | 44456  | 6.91E-14 | 0.85 |
| 30043 | 53398  | 53740  | 2.13E-04 | 0.91 |
| 30043 | 64955  | 65462  | 2.42E-10 | 0.73 |
| 30043 | 98374  | 98605  | 4.58E-03 | 1    |

|       |        |        |           |      |
|-------|--------|--------|-----------|------|
| 30044 | 6726   | 6997   | 3.79E-07  | 0.89 |
| 30044 | 70630  | 71296  | 3.41E-04  | 0.86 |
| 30044 | 132824 | 133714 | 1.14E-34  | 0.67 |
| 30044 | 135330 | 135667 | 5.27E-08  | 0.73 |
| 30044 | 154139 | 154511 | 3.57E-08  | 0.95 |
| 30044 | 204495 | 204753 | 2.26E-12  | 0.83 |
| 30044 | 293430 | 293708 | 1.66E-21  | 0.95 |
| 30044 | 296533 | 296857 | 1.75E-11  | 0.98 |
| 30045 | 5956   | 6312   | 1.63E-19  | 0.94 |
| 30045 | 45010  | 45301  | 4.72E-16  | 0.96 |
| 30045 | 71240  | 71562  | 6.95E-09  | 0.89 |
| 30045 | 113901 | 114763 | 5.17E-40  | 0.87 |
| 30045 | 140842 | 142952 | 1.59E-98  | 0.91 |
| 30045 | 194779 | 195557 | 3.86E-26  | 0.81 |
| 30045 | 195823 | 196248 | 2.81E-33  | 0.84 |
| 30045 | 201113 | 202126 | 5.84E-42  | 0.83 |
| 30045 | 203979 | 204548 | 4.92E-53  | 0.95 |
| 30045 | 209226 | 210599 | 7.36E-80  | 0.9  |
| 30045 | 211459 | 211829 | 9.37E-48  | 0.95 |
| 30045 | 221106 | 221858 | 1.15E-54  | 0.88 |
| 30045 | 222073 | 222722 | 8.50E-26  | 0.89 |
| 30045 | 224259 | 224908 | 1.17E-36  | 0.93 |
| 30045 | 225114 | 225528 | 3.87E-26  | 0.91 |
| 30045 | 245983 | 246209 | 3.47E-04  | 1    |
| 30045 | 248513 | 248793 | 2.32E-21  | 0.81 |
| 30045 | 251870 | 252241 | 3.07E-77  | 0.94 |
| 30045 | 256666 | 257069 | 1.20E-22  | 0.77 |
| 30045 | 279604 | 280380 | 8.86E-28  | 0.78 |
| 30045 | 282209 | 282697 | 1.12E-103 | 0.98 |
| 30045 | 314407 | 314701 | 2.10E-13  | 0.89 |
| 30045 | 314980 | 315476 | 1.57E-32  | 0.9  |
| 30045 | 344636 | 345139 | 2.06E-10  | 0.88 |
| 30045 | 345154 | 345823 | 1.16E-04  | 0.85 |
| 30045 | 383895 | 384512 | 9.75E-26  | 0.89 |
| 30045 | 387862 | 388322 | 4.00E-28  | 0.89 |
| 30045 | 399132 | 399618 | 3.20E-30  | 0.93 |
| 30045 | 420365 | 421045 | 9.63E-20  | 0.83 |
| 30045 | 426964 | 427233 | 7.23E-29  | 0.97 |
| 30045 | 427442 | 428320 | 1.15E-65  | 0.86 |
| 30045 | 465963 | 466956 | 1.18E-75  | 0.91 |
| 30045 | 468098 | 468772 | 8.45E-36  | 0.9  |
| 30045 | 473647 | 473902 | 9.97E-25  | 0.95 |
| 30045 | 477753 | 478710 | 4.60E-39  | 0.82 |
| 30045 | 489918 | 490525 | 2.01E-54  | 0.93 |
| 30045 | 490914 | 491479 | 5.18E-22  | 0.86 |
| 30045 | 536524 | 536856 | 4.58E-10  | 0.85 |
| 30046 | 19961  | 20311  | 8.16E-16  | 0.94 |
| 30046 | 45059  | 45474  | 4.59E-09  | 0.8  |
| 30046 | 76174  | 76723  | 4.09E-29  | 0.92 |
| 30046 | 77134  | 77514  | 2.17E-08  | 0.95 |
| 30046 | 106403 | 106837 | 2.24E-08  | 0.95 |
| 30046 | 133608 | 134771 | 9.42E-46  | 0.72 |
| 30046 | 135356 | 135768 | 2.59E-26  | 0.89 |

|       |        |        |           |      |
|-------|--------|--------|-----------|------|
| 30046 | 181885 | 182749 | 1.36E-92  | 0.92 |
| 30047 | 367    | 698    | 5.51E-08  | 0.94 |
| 30047 | 6181   | 6601   | 2.07E-09  | 0.9  |
| 30047 | 35841  | 36137  | 1.93E-11  | 0.8  |
| 30048 | 13325  | 13622  | 8.92E-09  | 0.91 |
| 30048 | 60947  | 61350  | 4.61E-86  | 0.97 |
| 30048 | 187350 | 187638 | 1.00E-35  | 0.88 |
| 30048 | 226363 | 226843 | 1.01E-52  | 0.61 |
| 30048 | 232977 | 233222 | 5.04E-05  | 1    |
| 30048 | 235554 | 235803 | 7.99E-38  | 0.94 |
| 30048 | 236050 | 236465 | 7.52E-11  | 0.86 |
| 30048 | 247924 | 249448 | 2.86E-127 | 0.95 |
| 30048 | 268163 | 268962 | 6.40E-53  | 0.84 |
| 30049 | 103862 | 104359 | 2.11E-23  | 0.95 |
| 30049 | 136806 | 137315 | 6.37E-14  | 0.7  |
| 30049 | 140879 | 141296 | 6.42E-10  | 0.79 |
| 30049 | 143110 | 144249 | 3.31E-09  | 0.94 |
| 30049 | 178574 | 178872 | 2.21E-11  | 0.97 |
| 30049 | 228017 | 228279 | 5.55E-13  | 0.91 |
| 30049 | 254949 | 255657 | 1.42E-13  | 0.81 |
| 30049 | 255702 | 256184 | 5.87E-07  | 0.85 |
| 30049 | 268402 | 268739 | 1.15E-03  | 0.8  |
| 30049 | 279413 | 279665 | 6.12E-11  | 0.86 |
| 30049 | 288250 | 288511 | 1.30E-24  | 0.76 |
| 30050 | 1234   | 1725   | 3.14E-12  | 0.98 |
| 30050 | 5169   | 5688   | 1.34E-13  | 0.98 |
| 30050 | 48578  | 48940  | 2.11E-06  | 0.83 |
| 30050 | 49476  | 50034  | 2.08E-17  | 0.87 |
| 30050 | 54469  | 54801  | 2.32E-08  | 0.82 |
| 30050 | 59920  | 60126  | 9.53E-04  | 0.84 |
| 30050 | 191014 | 191362 | 1.55E-06  | 0.96 |
| 30051 | 31084  | 31681  | 6.79E-31  | 0.94 |
| 30051 | 59738  | 60108  | 1.79E-08  | 0.85 |
| 30051 | 67014  | 67392  | 9.30E-25  | 0.95 |
| 30051 | 93242  | 93777  | 2.33E-73  | 0.84 |
| 30051 | 95258  | 96174  | 2.71E-43  | 0.6  |
| 30051 | 214662 | 215361 | 1.98E-70  | 0.92 |
| 30051 | 216155 | 216387 | 1.73E-49  | 0.91 |
| 30051 | 217350 | 218955 | 9.71E-62  | 0.74 |
| 30051 | 229546 | 230050 | 1.69E-26  | 0.92 |
| 30051 | 231434 | 231824 | 1.90E-16  | 0.8  |
| 30051 | 267269 | 267474 | 7.79E-27  | 0.94 |
| 30051 | 312033 | 312318 | 2.11E-06  | 0.83 |
| 30051 | 318840 | 319212 | 8.89E-16  | 0.77 |
| 30051 | 322345 | 322798 | 2.70E-80  | 0.93 |
| 30051 | 324184 | 324925 | 4.14E-75  | 0.95 |
| 30051 | 325413 | 325762 | 7.53E-44  | 0.78 |
| 30051 | 363802 | 365014 | 9.35E-51  | 0.83 |
| 30051 | 369003 | 369233 | 2.83E-21  | 0.83 |
| 30051 | 371785 | 372083 | 2.36E-37  | 0.94 |
| 30051 | 459437 | 459672 | 3.40E-05  | 0.96 |
| 30051 | 468577 | 469125 | 8.20E-17  | 0.82 |
| 30051 | 470883 | 471876 | 1.34E-41  | 0.82 |

|       |        |        |           |      |
|-------|--------|--------|-----------|------|
| 30052 | 48293  | 49166  | 1.03E-11  | 0.8  |
| 30052 | 53389  | 54043  | 1.29E-12  | 0.95 |
| 30052 | 54946  | 55634  | 8.62E-26  | 0.94 |
| 30052 | 60376  | 60626  | 8.18E-13  | 0.87 |
| 30052 | 65205  | 65517  | 6.73E-16  | 0.87 |
| 30052 | 65882  | 66209  | 2.27E-10  | 0.81 |
| 30052 | 66874  | 67154  | 4.00E-13  | 0.82 |
| 30052 | 110044 | 110383 | 2.32E-10  | 0.8  |
| 30052 | 113164 | 113390 | 2.93E-03  | 0.75 |
| 30053 | 12979  | 13717  | 8.71E-13  | 0.82 |
| 30053 | 14781  | 15226  | 1.60E-09  | 0.71 |
| 30053 | 48630  | 48968  | 3.63E-15  | 0.63 |
| 30054 | 6140   | 6617   | 4.71E-29  | 0.84 |
| 30054 | 7182   | 7988   | 8.27E-39  | 0.76 |
| 30054 | 8221   | 8951   | 7.04E-33  | 0.7  |
| 30054 | 18502  | 18726  | 1.16E-24  | 0.88 |
| 30054 | 32438  | 32669  | 2.04E-10  | 0.78 |
| 30054 | 60812  | 61105  | 3.69E-22  | 0.67 |
| 30054 | 61566  | 62033  | 3.53E-30  | 0.88 |
| 30054 | 63455  | 63947  | 2.47E-71  | 0.79 |
| 30054 | 69120  | 69409  | 6.88E-14  | 0.82 |
| 30054 | 69657  | 70202  | 5.31E-09  | 0.64 |
| 30054 | 76337  | 77221  | 4.31E-74  | 0.8  |
| 30054 | 82022  | 82886  | 2.60E-20  | 0.69 |
| 30054 | 86500  | 86984  | 4.46E-15  | 0.84 |
| 30054 | 94565  | 95140  | 1.47E-13  | 0.73 |
| 30054 | 95370  | 96139  | 2.76E-36  | 0.81 |
| 30054 | 100599 | 101041 | 3.53E-42  | 0.91 |
| 30054 | 103320 | 104083 | 9.50E-42  | 0.87 |
| 30054 | 110131 | 110966 | 6.08E-41  | 0.87 |
| 30054 | 130582 | 131026 | 2.98E-42  | 0.77 |
| 30054 | 131514 | 131919 | 1.33E-07  | 0.77 |
| 30054 | 136839 | 137872 | 4.28E-52  | 0.62 |
| 30054 | 159511 | 160216 | 9.88E-45  | 0.71 |
| 30054 | 160903 | 162943 | 4.65E-140 | 0.76 |
| 30054 | 170860 | 171477 | 3.61E-38  | 0.87 |
| 30054 | 171730 | 172235 | 2.22E-22  | 0.89 |
| 30054 | 174980 | 176308 | 7.72E-50  | 0.7  |
| 30054 | 178596 | 178818 | 5.37E-24  | 0.9  |
| 30054 | 228079 | 228345 | 1.23E-23  | 0.79 |
| 30054 | 296382 | 296923 | 3.03E-37  | 0.91 |
| 30055 | 8012   | 8493   | 1.23E-14  | 0.73 |
| 30055 | 9744   | 10240  | 2.66E-22  | 0.61 |
| 30055 | 12696  | 12935  | 4.42E-15  | 0.68 |
| 30055 | 16735  | 17367  | 1.90E-28  | 0.89 |
| 30055 | 32844  | 33381  | 6.36E-24  | 0.84 |
| 30055 | 34383  | 34657  | 7.60E-20  | 0.85 |
| 30055 | 35013  | 35395  | 1.45E-32  | 0.95 |
| 30055 | 35706  | 36388  | 1.68E-34  | 0.92 |
| 30055 | 37449  | 38551  | 6.24E-79  | 0.8  |
| 30055 | 54263  | 56330  | 8.88E-103 | 0.83 |
| 30055 | 63231  | 64439  | 3.68E-45  | 0.64 |
| 30055 | 101691 | 102509 | 1.25E-21  | 0.72 |



|       |        |        |           |      |
|-------|--------|--------|-----------|------|
| 30055 | 105287 | 106178 | 1.63E-34  | 0.8  |
| 30055 | 110999 | 111564 | 5.96E-62  | 0.78 |
| 30055 | 119605 | 120049 | 8.41E-16  | 0.79 |
| 30055 | 139642 | 139973 | 1.39E-09  | 0.78 |
| 30055 | 139750 | 139988 | 1.38E-11  | 0.8  |
| 30055 | 156629 | 156985 | 7.71E-30  | 0.86 |
| 30055 | 172134 | 172702 | 1.67E-40  | 0.62 |
| 30055 | 174804 | 175405 | 9.49E-31  | 0.82 |
| 30055 | 175700 | 176551 | 2.33E-71  | 0.86 |
| 30055 | 181831 | 182303 | 4.96E-30  | 0.76 |
| 30055 | 213362 | 213581 | 1.84E-14  | 0.76 |
| 30055 | 253307 | 255141 | 5.43E-104 | 0.88 |
| 30055 | 260081 | 260608 | 3.90E-31  | 0.83 |
| 30055 | 262407 | 262855 | 1.91E-52  | 0.91 |
| 30055 | 272213 | 272549 | 5.85E-06  | 0.73 |
| 30055 | 279552 | 280102 | 7.36E-44  | 0.91 |
| 30055 | 301336 | 301673 | 1.36E-30  | 0.61 |
| 30055 | 311646 | 312468 | 1.92E-51  | 0.69 |
| 30055 | 319318 | 319846 | 3.20E-12  | 0.75 |
| 30055 | 347806 | 348571 | 2.10E-60  | 0.77 |
| 30055 | 353831 | 354105 | 2.17E-32  | 0.92 |
| 30055 | 354882 | 355109 | 3.41E-16  | 0.79 |
| 30055 | 364859 | 365192 | 2.93E-37  | 0.95 |
| 30055 | 373165 | 373531 | 5.86E-30  | 0.69 |
| 30055 | 442191 | 443665 | 4.92E-68  | 0.87 |
| 30055 | 452188 | 452908 | 7.10E-100 | 0.89 |
| 30055 | 487775 | 488132 | 1.43E-29  | 0.88 |
| 30055 | 488362 | 489212 | 1.20E-61  | 0.91 |
| 30055 | 492746 | 492989 | 2.03E-19  | 0.71 |
| 30055 | 493749 | 494603 | 4.96E-61  | 0.72 |
| 30055 | 529600 | 529841 | 2.18E-19  | 0.82 |
| 30056 | 4747   | 4997   | 1.57E-04  | 0.85 |
| 30056 | 20420  | 21156  | 5.14E-16  | 0.62 |
| 30056 | 43381  | 44443  | 4.37E-08  | 0.84 |
| 30056 | 57252  | 57527  | 6.46E-04  | 0.76 |
| 30056 | 70800  | 71462  | 5.62E-06  | 0.88 |
| 30056 | 148422 | 148693 | 9.50E-05  | 0.81 |
| 30056 | 219547 | 220074 | 2.43E-14  | 0.79 |
| 30056 | 229461 | 229867 | 7.22E-21  | 0.8  |
| 30056 | 240079 | 240584 | 8.91E-05  | 0.75 |
| 30056 | 284240 | 284536 | 2.02E-10  | 0.85 |
| 30056 | 354599 | 354910 | 1.56E-04  | 0.86 |
| 30056 | 372723 | 373005 | 8.51E-04  | 1    |
| 30056 | 381860 | 382101 | 7.63E-06  | 0.84 |
| 30056 | 382362 | 382684 | 3.16E-09  | 0.97 |
| 30056 | 384257 | 385071 | 3.29E-06  | 0.88 |
| 30056 | 404969 | 405596 | 2.59E-09  | 0.81 |
| 30056 | 451821 | 452183 | 4.10E-09  | 0.81 |
| 30056 | 470791 | 471205 | 1.66E-07  | 0.82 |
| 30056 | 483104 | 483703 | 3.42E-06  | 0.82 |
| 30056 | 487930 | 488252 | 6.03E-09  | 1    |
| 30056 | 488202 | 488558 | 2.20E-07  | 1    |
| 30056 | 490555 | 490820 | 1.36E-05  | 0.85 |

|       |         |         |          |      |
|-------|---------|---------|----------|------|
| 30056 | 536281  | 536567  | 5.63E-16 | 0.93 |
| 30056 | 557469  | 557681  | 8.54E-06 | 0.97 |
| 30056 | 597269  | 597517  | 8.08E-07 | 0.83 |
| 30056 | 614283  | 614516  | 6.48E-06 | 0.9  |
| 30056 | 617903  | 618284  | 3.96E-12 | 0.81 |
| 30056 | 664603  | 664827  | 1.97E-15 | 0.9  |
| 30056 | 689006  | 689429  | 3.48E-08 | 1    |
| 30056 | 698468  | 698717  | 1.32E-14 | 0.86 |
| 30056 | 704370  | 704883  | 1.57E-13 | 0.66 |
| 30056 | 719074  | 719275  | 8.22E-19 | 0.89 |
| 30056 | 727492  | 727764  | 2.57E-05 | 0.76 |
| 30056 | 755016  | 755226  | 1.37E-04 | 0.95 |
| 30056 | 841325  | 841568  | 2.57E-31 | 0.81 |
| 30056 | 860146  | 860623  | 1.64E-10 | 0.94 |
| 30056 | 890164  | 890610  | 1.89E-15 | 0.86 |
| 30056 | 923622  | 924196  | 6.07E-07 | 0.84 |
| 30056 | 931011  | 931434  | 7.93E-07 | 0.96 |
| 30056 | 978349  | 978628  | 6.03E-07 | 0.88 |
| 30056 | 990192  | 990658  | 8.25E-05 | 0.84 |
| 30056 | 1004476 | 1004775 | 2.20E-09 | 0.85 |
| 30056 | 1010529 | 1010778 | 3.67E-04 | 0.96 |
| 30056 | 1010991 | 1011328 | 1.16E-03 | 0.96 |
| 30056 | 1018933 | 1019229 | 5.44E-09 | 0.9  |
| 30056 | 1063547 | 1063935 | 5.61E-10 | 0.94 |
| 30056 | 1064141 | 1064635 | 4.76E-10 | 0.96 |
| 30056 | 1079316 | 1079848 | 1.96E-11 | 0.85 |
| 30056 | 1080092 | 1080880 | 2.03E-42 | 0.78 |
| 30056 | 1088821 | 1089307 | 2.34E-15 | 0.92 |
| 30056 | 1095628 | 1096055 | 6.36E-07 | 0.97 |
| 30056 | 1103810 | 1104183 | 5.85E-26 | 0.95 |
| 30056 | 1128675 | 1129114 | 2.59E-08 | 0.85 |
| 30056 | 1174398 | 1175108 | 3.07E-56 | 0.93 |
| 30056 | 1228421 | 1228789 | 1.02E-05 | 0.9  |
| 30056 | 1242801 | 1243128 | 3.06E-37 | 0.95 |
| 30056 | 1257453 | 1258022 | 5.33E-16 | 0.88 |
| 30056 | 1258263 | 1258467 | 3.05E-16 | 0.92 |
| 30057 | 1       | 578     | 3.85E-13 | 0.82 |
| 30057 | 18057   | 18446   | 2.53E-39 | 0.9  |
| 30058 | 7646    | 8257    | 3.58E-20 | 0.95 |
| 30058 | 25384   | 25911   | 5.25E-26 | 0.95 |
| 30058 | 56846   | 57505   | 4.13E-41 | 0.89 |
| 30058 | 144467  | 144936  | 1.55E-36 | 0.96 |
| 30058 | 148595  | 149265  | 8.40E-31 | 0.93 |
| 30058 | 171199  | 171461  | 4.19E-09 | 0.77 |
| 30059 | 15282   | 15602   | 2.43E-10 | 0.77 |
| 30059 | 29752   | 30251   | 6.85E-16 | 0.84 |
| 30059 | 35934   | 36683   | 3.72E-22 | 0.76 |
| 30059 | 37716   | 38287   | 3.35E-23 | 0.79 |
| 30059 | 100098  | 100604  | 2.44E-11 | 0.77 |
| 30059 | 151839  | 152862  | 5.40E-34 | 0.83 |
| 30060 | 38      | 906     | 2.08E-16 | 0.81 |
| 30060 | 3933    | 4476    | 4.86E-24 | 0.81 |
| 30060 | 35754   | 36408   | 8.60E-47 | 0.94 |

|       |        |        |           |      |
|-------|--------|--------|-----------|------|
| 30060 | 45675  | 45958  | 7.18E-07  | 0.79 |
| 30060 | 116791 | 117939 | 2.12E-47  | 0.64 |
| 30060 | 118961 | 119516 | 1.89E-25  | 0.89 |
| 30060 | 119893 | 120442 | 2.80E-16  | 0.83 |
| 30060 | 120063 | 120513 | 6.94E-25  | 0.92 |
| 30060 | 124054 | 124650 | 1.11E-25  | 0.89 |
| 30060 | 125690 | 126022 | 5.46E-12  | 0.79 |
| 30060 | 172109 | 172462 | 1.15E-40  | 0.87 |
| 30060 | 172710 | 173221 | 8.51E-48  | 0.88 |
| 30060 | 179677 | 180270 | 6.48E-13  | 0.76 |
| 30060 | 285433 | 285699 | 6.04E-19  | 0.96 |
| 30060 | 295094 | 295354 | 5.91E-16  | 0.77 |
| 30060 | 317503 | 318401 | 1.59E-75  | 0.94 |
| 30060 | 326455 | 327079 | 4.45E-68  | 0.98 |
| 30060 | 327910 | 328644 | 5.43E-34  | 0.92 |
| 30060 | 334591 | 334997 | 4.38E-18  | 0.98 |
| 30060 | 337097 | 337440 | 4.67E-16  | 0.9  |
| 30060 | 355935 | 356486 | 1.37E-27  | 0.8  |
| 30060 | 359350 | 359632 | 5.52E-11  | 0.86 |
| 30060 | 372894 | 373237 | 9.99E-31  | 0.78 |
| 30060 | 376046 | 376730 | 1.65E-18  | 0.93 |
| 30060 | 414133 | 414549 | 6.30E-38  | 0.89 |
| 30060 | 417532 | 417897 | 1.53E-08  | 0.83 |
| 30060 | 446132 | 446748 | 1.55E-48  | 0.84 |
| 30060 | 460067 | 460611 | 2.08E-14  | 0.96 |
| 30060 | 463088 | 463701 | 7.54E-21  | 0.69 |
| 30060 | 493131 | 495247 | 4.04E-150 | 0.96 |
| 30060 | 495832 | 496911 | 8.34E-111 | 0.96 |
| 30060 | 498091 | 500046 | 5.81E-203 | 0.94 |
| 30060 | 510070 | 510469 | 1.94E-25  | 0.96 |
| 30061 | 28508  | 28937  | 4.97E-38  | 0.95 |
| 30061 | 30480  | 31279  | 8.59E-13  | 0.81 |
| 30061 | 36615  | 37222  | 2.20E-32  | 0.89 |
| 30061 | 43415  | 43620  | 4.83E-16  | 0.82 |
| 30061 | 64149  | 64783  | 2.52E-22  | 0.88 |
| 30061 | 93644  | 94207  | 1.41E-18  | 0.75 |
| 30061 | 101985 | 103004 | 2.70E-63  | 0.82 |
| 30061 | 107845 | 108157 | 3.05E-23  | 0.95 |
| 30061 | 115495 | 115703 | 5.17E-17  | 0.97 |
| 30061 | 118583 | 118845 | 1.25E-14  | 0.92 |
| 30061 | 132726 | 133232 | 1.07E-64  | 0.77 |
| 30061 | 134196 | 134497 | 2.56E-12  | 0.83 |
| 30061 | 134731 | 135553 | 7.58E-48  | 0.88 |
| 30061 | 138751 | 139223 | 2.77E-10  | 0.82 |
| 30061 | 141979 | 142274 | 1.29E-04  | 0.75 |
| 30061 | 151074 | 151377 | 1.21E-18  | 0.87 |
| 30061 | 153390 | 153758 | 8.91E-09  | 0.81 |
| 30061 | 158453 | 159079 | 8.25E-27  | 0.87 |
| 30061 | 161926 | 162225 | 1.43E-09  | 0.65 |
| 30061 | 192448 | 193177 | 4.98E-48  | 0.6  |
| 30061 | 195021 | 195697 | 3.38E-13  | 0.78 |
| 30061 | 211619 | 211940 | 1.06E-07  | 0.96 |
| 30061 | 218089 | 218338 | 2.85E-10  | 0.96 |

|       |        |        |           |      |
|-------|--------|--------|-----------|------|
| 30061 | 229752 | 230491 | 2.07E-44  | 0.89 |
| 30061 | 270760 | 271141 | 1.40E-08  | 0.78 |
| 30061 | 301351 | 301734 | 1.01E-18  | 0.93 |
| 30061 | 325964 | 326329 | 2.13E-24  | 0.81 |
| 30061 | 333926 | 334281 | 3.91E-104 | 0.94 |
| 30062 | 15066  | 15415  | 1.42E-11  | 0.86 |
| 30062 | 45533  | 45866  | 3.63E-06  | 0.85 |
| 30062 | 80141  | 80431  | 8.44E-09  | 0.89 |
| 30062 | 110420 | 110697 | 2.12E-04  | 0.82 |
| 30062 | 110461 | 110744 | 4.61E-04  | 0.8  |
| 30062 | 155959 | 156401 | 3.54E-07  | 0.9  |
| 30062 | 195764 | 195974 | 1.25E-05  | 0.91 |
| 30062 | 232377 | 232632 | 9.64E-06  | 0.85 |
| 30062 | 232827 | 233058 | 4.90E-05  | 0.77 |
| 30062 | 234644 | 235124 | 5.57E-04  | 0.75 |
| 30062 | 235017 | 235324 | 1.59E-04  | 0.87 |
| 30062 | 241543 | 241818 | 2.26E-07  | 0.79 |
| 30062 | 272013 | 272457 | 1.31E-16  | 0.86 |
| 30062 | 301977 | 302232 | 7.33E-07  | 0.94 |
| 30062 | 308388 | 309048 | 1.51E-11  | 0.88 |
| 30062 | 310607 | 310874 | 2.99E-06  | 0.8  |
| 30062 | 316816 | 317497 | 1.55E-14  | 0.72 |
| 30062 | 324626 | 324930 | 1.47E-04  | 0.94 |
| 30062 | 341962 | 342214 | 4.18E-06  | 0.71 |
| 30063 | 7250   | 8221   | 3.73E-51  | 0.84 |
| 30063 | 8434   | 8833   | 1.87E-32  | 0.9  |
| 30063 | 12826  | 13271  | 8.54E-09  | 0.76 |
| 30063 | 13544  | 14229  | 1.32E-28  | 0.86 |
| 30063 | 66324  | 67071  | 1.06E-63  | 0.88 |
| 30063 | 78426  | 78843  | 1.03E-97  | 0.92 |
| 30063 | 109261 | 109823 | 8.59E-66  | 0.76 |
| 30063 | 125321 | 125991 | 8.79E-39  | 0.9  |
| 30063 | 134407 | 134729 | 1.61E-17  | 0.84 |
| 30063 | 142759 | 142967 | 5.37E-07  | 0.94 |
| 30063 | 156065 | 156422 | 1.67E-115 | 0.95 |
| 30063 | 165987 | 166380 | 3.73E-22  | 0.68 |
| 30063 | 166645 | 167090 | 8.31E-12  | 0.6  |
| 30063 | 167520 | 167968 | 2.21E-76  | 0.94 |
| 30063 | 181611 | 182125 | 1.26E-42  | 0.84 |
| 30063 | 200846 | 201663 | 1.41E-36  | 0.73 |
| 30063 | 202953 | 203353 | 5.95E-13  | 0.83 |
| 30063 | 204284 | 204846 | 5.19E-37  | 0.79 |
| 30063 | 215361 | 215675 | 3.35E-20  | 0.8  |
| 30063 | 217256 | 217617 | 4.07E-87  | 0.87 |
| 30063 | 218004 | 219562 | 7.13E-63  | 0.68 |
| 30063 | 220013 | 220273 | 2.15E-25  | 0.84 |
| 30063 | 220536 | 222840 | 3.68E-83  | 0.84 |
| 30063 | 223859 | 224127 | 7.33E-43  | 0.84 |
| 30063 | 224457 | 225482 | 2.39E-55  | 0.9  |
| 30063 | 226565 | 227030 | 3.73E-55  | 0.95 |
| 30063 | 228525 | 229429 | 3.72E-90  | 0.93 |
| 30063 | 259949 | 260563 | 3.61E-24  | 0.67 |
| 30063 | 262036 | 263177 | 2.36E-53  | 0.92 |

|       |        |        |           |      |
|-------|--------|--------|-----------|------|
| 30063 | 266331 | 266831 | 1.78E-18  | 0.6  |
| 30063 | 268937 | 269929 | 3.03E-136 | 0.96 |
| 30063 | 270565 | 270900 | 7.41E-28  | 0.91 |
| 30063 | 286275 | 286585 | 1.82E-06  | 0.71 |
| 30063 | 303667 | 303973 | 1.07E-17  | 0.6  |
| 30063 | 346875 | 347344 | 1.73E-06  | 0.89 |
| 30063 | 360654 | 361056 | 1.08E-20  | 0.88 |
| 30063 | 367717 | 368068 | 5.12E-17  | 0.91 |
| 30063 | 371770 | 372606 | 2.76E-26  | 0.89 |
| 30063 | 374647 | 376215 | 4.94E-117 | 0.89 |
| 30063 | 377774 | 378077 | 4.37E-35  | 0.93 |
| 30063 | 391067 | 391274 | 6.90E-15  | 0.89 |
| 30063 | 392029 | 392572 | 1.58E-62  | 0.96 |
| 30063 | 393354 | 393646 | 5.60E-27  | 0.88 |
| 30063 | 405642 | 406310 | 5.23E-32  | 0.81 |
| 30063 | 429943 | 430468 | 6.97E-42  | 0.9  |
| 30063 | 433952 | 434273 | 2.10E-82  | 0.96 |
| 30063 | 476927 | 477217 | 4.77E-20  | 0.8  |
| 30063 | 496113 | 496329 | 1.17E-20  | 0.86 |
| 30063 | 498781 | 499457 | 4.70E-30  | 0.87 |
| 30063 | 499937 | 500624 | 6.94E-17  | 0.72 |
| 30063 | 505722 | 507019 | 2.14E-38  | 0.75 |
| 30063 | 513525 | 514729 | 8.70E-58  | 0.72 |
| 30063 | 518253 | 518551 | 2.70E-13  | 0.86 |
| 30063 | 528693 | 529277 | 1.43E-39  | 0.92 |
| 30063 | 538831 | 539454 | 4.43E-62  | 0.91 |
| 30063 | 539834 | 540349 | 5.13E-18  | 0.86 |
| 30063 | 541034 | 541753 | 7.05E-27  | 0.88 |
| 30063 | 542191 | 542531 | 3.67E-23  | 0.89 |
| 30063 | 568845 | 569258 | 2.18E-26  | 0.96 |
| 30063 | 582541 | 582889 | 1.05E-23  | 0.94 |
| 30063 | 587415 | 587770 | 4.01E-64  | 1    |
| 30063 | 588443 | 588838 | 9.35E-18  | 0.83 |
| 30063 | 589154 | 589358 | 3.63E-28  | 0.87 |
| 30063 | 641329 | 641887 | 2.71E-35  | 0.87 |
| 30063 | 646202 | 647001 | 3.00E-48  | 0.88 |
| 30063 | 648648 | 649511 | 5.99E-105 | 0.92 |
| 30063 | 651401 | 652006 | 3.11E-41  | 0.93 |
| 30063 | 652550 | 653307 | 6.17E-41  | 0.79 |
| 30063 | 654852 | 655097 | 6.49E-34  | 0.95 |
| 30063 | 683937 | 684272 | 1.55E-17  | 0.73 |
| 30063 | 707267 | 707523 | 2.50E-12  | 0.93 |
| 30063 | 893356 | 893955 | 8.78E-31  | 0.95 |
| 30063 | 927377 | 927876 | 1.82E-21  | 0.95 |
| 30063 | 975093 | 975489 | 5.96E-30  | 0.97 |
| 30063 | 984788 | 985343 | 1.03E-20  | 0.95 |
| 30063 | 986914 | 987204 | 1.57E-24  | 0.92 |
| 30063 | 987868 | 988253 | 1.70E-16  | 0.74 |
| 30063 | 992618 | 993008 | 8.93E-23  | 0.91 |
| 30064 | 22482  | 22921  | 6.86E-27  | 0.87 |
| 30064 | 32198  | 32511  | 7.96E-22  | 0.96 |
| 30064 | 36989  | 39754  | 8.43E-169 | 0.8  |
| 30064 | 40671  | 40946  | 2.01E-19  | 0.92 |

|       |        |        |           |      |
|-------|--------|--------|-----------|------|
| 30064 | 82370  | 83030  | 1.56E-25  | 0.68 |
| 30064 | 93564  | 94001  | 3.84E-06  | 1    |
| 30064 | 161721 | 162107 | 5.14E-40  | 0.91 |
| 30064 | 180152 | 180509 | 6.63E-25  | 0.65 |
| 30064 | 191160 | 191661 | 5.93E-46  | 0.92 |
| 30064 | 191993 | 192488 | 4.65E-10  | 0.69 |
| 30065 | 24923  | 25169  | 6.82E-08  | 0.83 |
| 30065 | 76347  | 76837  | 8.44E-19  | 0.86 |
| 30065 | 87867  | 88214  | 3.41E-32  | 0.86 |
| 30065 | 89927  | 90222  | 1.85E-21  | 0.82 |
| 30065 | 117410 | 117674 | 9.12E-10  | 0.88 |
| 30065 | 118255 | 118533 | 8.69E-29  | 0.97 |
| 30065 | 134957 | 135968 | 2.20E-32  | 0.91 |
| 30065 | 162033 | 162339 | 3.34E-04  | 0.79 |
| 30065 | 176074 | 176389 | 1.69E-05  | 0.82 |
| 30065 | 200084 | 200532 | 6.30E-09  | 0.82 |
| 30065 | 230338 | 231013 | 1.66E-34  | 0.92 |
| 30065 | 241181 | 241437 | 4.47E-35  | 0.9  |
| 30065 | 250395 | 250843 | 4.22E-04  | 0.95 |
| 30065 | 254487 | 254764 | 1.67E-05  | 0.71 |
| 30065 | 294820 | 295451 | 3.24E-52  | 0.93 |
| 30065 | 309200 | 309649 | 3.00E-33  | 0.92 |
| 30065 | 309965 | 310265 | 5.86E-41  | 0.95 |
| 30065 | 311577 | 311827 | 3.72E-47  | 0.96 |
| 30065 | 313392 | 313784 | 8.74E-36  | 0.9  |
| 30065 | 353976 | 354373 | 8.74E-07  | 0.82 |
| 30065 | 395700 | 397399 | 6.39E-60  | 0.8  |
| 30065 | 400376 | 401359 | 5.69E-54  | 0.78 |
| 30065 | 401869 | 402294 | 6.36E-48  | 0.89 |
| 30065 | 402551 | 403419 | 6.23E-84  | 0.93 |
| 30065 | 404161 | 406892 | 1.10E-170 | 0.73 |
| 30065 | 407299 | 408073 | 3.47E-57  | 0.87 |
| 30065 | 413254 | 413570 | 1.63E-32  | 0.85 |
| 30065 | 420303 | 420573 | 1.28E-07  | 0.88 |
| 30065 | 434869 | 435600 | 3.52E-25  | 0.88 |
| 30065 | 445161 | 445921 | 9.65E-23  | 0.97 |
| 30065 | 458535 | 459013 | 4.82E-29  | 0.87 |
| 30065 | 459377 | 459926 | 2.94E-21  | 0.68 |
| 30065 | 460266 | 460621 | 1.37E-34  | 0.88 |
| 30065 | 462000 | 462961 | 8.76E-97  | 0.93 |
| 30065 | 463193 | 463721 | 7.44E-39  | 0.87 |
| 30065 | 469462 | 470352 | 2.48E-41  | 0.94 |
| 30065 | 499535 | 499999 | 2.06E-13  | 0.84 |
| 30065 | 502435 | 502791 | 4.59E-30  | 0.89 |
| 30065 | 503094 | 503544 | 3.36E-35  | 0.98 |
| 30065 | 505169 | 505612 | 8.87E-42  | 0.92 |
| 30065 | 542981 | 543264 | 1.90E-08  | 0.8  |
| 30065 | 543946 | 544312 | 1.01E-08  | 0.88 |
| 30065 | 555002 | 555326 | 8.46E-18  | 0.91 |
| 30065 | 641921 | 642946 | 9.39E-120 | 0.97 |
| 30065 | 831130 | 831497 | 1.19E-31  | 0.9  |
| 30065 | 831717 | 832169 | 2.35E-20  | 0.7  |
| 30065 | 843245 | 843619 | 3.92E-12  | 0.78 |

|       |         |         |           |      |
|-------|---------|---------|-----------|------|
| 30065 | 845154  | 846098  | 1.04E-42  | 0.79 |
| 30065 | 855030  | 855461  | 2.67E-15  | 0.99 |
| 30065 | 866644  | 867180  | 5.65E-21  | 0.88 |
| 30065 | 867665  | 868777  | 1.73E-35  | 0.68 |
| 30065 | 934467  | 934701  | 1.82E-12  | 0.9  |
| 30065 | 935399  | 935911  | 4.11E-35  | 0.94 |
| 30065 | 968176  | 968438  | 3.30E-04  | 1    |
| 30065 | 1048232 | 1048441 | 1.64E-22  | 0.95 |
| 30065 | 1049340 | 1049588 | 5.00E-05  | 0.82 |
| 30065 | 1052568 | 1053235 | 1.72E-29  | 0.86 |
| 30065 | 1074403 | 1075151 | 6.36E-29  | 0.84 |
| 30065 | 1084805 | 1085456 | 1.00E-51  | 0.96 |
| 30065 | 1087041 | 1088000 | 3.80E-63  | 0.95 |
| 30066 | 72781   | 73987   | 6.99E-54  | 0.85 |
| 30066 | 74537   | 75213   | 2.16E-38  | 0.92 |
| 30066 | 76003   | 76363   | 3.16E-18  | 0.85 |
| 30066 | 81378   | 81713   | 1.40E-13  | 0.65 |
| 30066 | 104631  | 105002  | 2.86E-59  | 0.83 |
| 30066 | 130120  | 131025  | 1.53E-37  | 0.87 |
| 30066 | 131449  | 131790  | 3.16E-18  | 0.81 |
| 30066 | 133180  | 133407  | 1.85E-26  | 0.91 |
| 30066 | 143337  | 143832  | 1.14E-38  | 0.84 |
| 30066 | 151035  | 151668  | 3.43E-65  | 0.87 |
| 30066 | 152211  | 153384  | 2.96E-126 | 0.87 |
| 30066 | 158175  | 158500  | 6.86E-22  | 0.94 |
| 30066 | 177990  | 178236  | 2.42E-14  | 0.87 |
| 30066 | 193888  | 194134  | 2.93E-17  | 0.71 |
| 30066 | 206229  | 206504  | 7.75E-22  | 0.84 |
| 30066 | 219158  | 219864  | 1.09E-20  | 0.88 |
| 30066 | 220128  | 220830  | 8.51E-81  | 0.92 |
| 30066 | 221672  | 222180  | 4.97E-71  | 0.89 |
| 30066 | 242197  | 242940  | 1.63E-24  | 0.87 |
| 30066 | 274517  | 274937  | 1.68E-12  | 0.83 |
| 30066 | 289409  | 289727  | 5.45E-19  | 0.86 |
| 30066 | 323706  | 324265  | 1.05E-15  | 0.71 |
| 30067 | 73006   | 73476   | 1.13E-05  | 0.83 |
| 30067 | 103357  | 103601  | 2.02E-26  | 0.92 |
| 30068 | 39911   | 40251   | 3.09E-15  | 0.8  |
| 30068 | 40472   | 42108   | 2.78E-64  | 0.76 |
| 30068 | 104780  | 105579  | 3.60E-52  | 0.81 |
| 30068 | 113851  | 114190  | 4.48E-20  | 0.86 |
| 30068 | 114442  | 115215  | 1.30E-55  | 0.78 |
| 30068 | 131262  | 132613  | 8.02E-79  | 0.7  |
| 30068 | 143355  | 143648  | 7.02E-14  | 0.79 |
| 30068 | 150081  | 150749  | 7.43E-20  | 0.63 |
| 30068 | 182498  | 182744  | 4.58E-30  | 0.82 |
| 30068 | 205269  | 205748  | 1.22E-16  | 0.76 |
| 30068 | 214376  | 216100  | 1.02E-126 | 0.86 |
| 30068 | 217786  | 218110  | 2.74E-16  | 0.81 |
| 30068 | 236318  | 237100  | 3.40E-27  | 0.69 |
| 30068 | 265868  | 266734  | 2.42E-35  | 0.83 |
| 30068 | 291348  | 291794  | 1.67E-50  | 0.8  |
| 30068 | 292049  | 293478  | 4.09E-64  | 0.74 |

|       |         |         |           |      |
|-------|---------|---------|-----------|------|
| 30068 | 298415  | 298849  | 7.42E-23  | 0.94 |
| 30068 | 302961  | 303980  | 4.53E-49  | 0.87 |
| 30068 | 310079  | 310591  | 1.14E-36  | 0.89 |
| 30068 | 333541  | 334728  | 1.09E-50  | 0.82 |
| 30068 | 333655  | 334771  | 2.48E-47  | 0.86 |
| 30068 | 339344  | 340261  | 3.46E-49  | 0.7  |
| 30068 | 359639  | 360059  | 1.22E-25  | 0.86 |
| 30068 | 531936  | 533366  | 7.34E-54  | 0.74 |
| 30068 | 549861  | 550224  | 2.25E-20  | 0.81 |
| 30068 | 550441  | 550652  | 1.05E-07  | 0.8  |
| 30068 | 557690  | 557995  | 1.94E-25  | 0.9  |
| 30068 | 562230  | 563457  | 4.64E-50  | 0.61 |
| 30068 | 590819  | 591393  | 8.86E-34  | 0.8  |
| 30068 | 591735  | 592152  | 1.27E-31  | 0.83 |
| 30068 | 667444  | 667765  | 5.64E-19  | 0.84 |
| 30068 | 677477  | 679398  | 2.05E-114 | 0.76 |
| 30068 | 683751  | 684161  | 7.25E-18  | 0.73 |
| 30068 | 684656  | 685151  | 1.54E-40  | 0.91 |
| 30068 | 703284  | 705078  | 1.03E-67  | 0.75 |
| 30068 | 741444  | 741959  | 2.03E-30  | 0.83 |
| 30068 | 743795  | 744559  | 2.88E-29  | 0.85 |
| 30068 | 745899  | 746374  | 8.53E-36  | 0.94 |
| 30068 | 747967  | 748486  | 8.31E-22  | 0.84 |
| 30068 | 772172  | 772613  | 4.49E-20  | 0.82 |
| 30068 | 800590  | 801607  | 2.10E-72  | 0.8  |
| 30068 | 813101  | 813860  | 8.72E-38  | 0.77 |
| 30068 | 841054  | 841521  | 7.94E-40  | 0.85 |
| 30068 | 844976  | 845391  | 8.37E-33  | 0.83 |
| 30068 | 865500  | 865849  | 4.54E-20  | 0.69 |
| 30068 | 867544  | 868060  | 2.46E-11  | 0.72 |
| 30068 | 869374  | 870249  | 2.58E-18  | 0.8  |
| 30068 | 875431  | 876515  | 1.18E-94  | 0.89 |
| 30068 | 883388  | 884650  | 7.03E-56  | 0.78 |
| 30068 | 908713  | 909116  | 2.69E-21  | 0.81 |
| 30068 | 922602  | 923241  | 1.01E-36  | 0.72 |
| 30068 | 928028  | 928585  | 1.16E-37  | 0.87 |
| 30068 | 948422  | 949227  | 5.60E-27  | 0.77 |
| 30068 | 955602  | 956097  | 1.38E-32  | 0.87 |
| 30068 | 956412  | 956889  | 1.23E-16  | 0.78 |
| 30068 | 960116  | 960532  | 3.94E-19  | 0.89 |
| 30068 | 960744  | 961216  | 4.28E-16  | 0.77 |
| 30068 | 961997  | 962443  | 1.04E-21  | 0.82 |
| 30068 | 969958  | 970838  | 2.63E-67  | 0.86 |
| 30068 | 982714  | 983758  | 5.66E-32  | 0.79 |
| 30068 | 984222  | 984529  | 2.03E-16  | 0.74 |
| 30068 | 984853  | 985186  | 4.45E-12  | 0.81 |
| 30068 | 988969  | 990403  | 5.64E-82  | 0.83 |
| 30068 | 996049  | 996340  | 3.27E-17  | 0.76 |
| 30068 | 1026234 | 1027381 | 3.32E-63  | 0.87 |
| 30068 | 1032576 | 1033204 | 2.40E-62  | 0.74 |
| 30068 | 1046205 | 1046549 | 7.76E-36  | 0.88 |
| 30069 | 3378    | 3776    | 1.28E-04  | 0.81 |
| 30069 | 10564   | 10780   | 2.65E-04  | 0.92 |



|       |        |        |           |      |
|-------|--------|--------|-----------|------|
| 30069 | 43078  | 43478  | 1.37E-18  | 0.79 |
| 30069 | 47627  | 48026  | 2.27E-24  | 0.94 |
| 30069 | 50900  | 51522  | 1.31E-08  | 0.85 |
| 30069 | 54116  | 55003  | 5.06E-08  | 0.94 |
| 30069 | 55973  | 56440  | 5.13E-09  | 0.77 |
| 30069 | 63772  | 64139  | 1.44E-06  | 0.84 |
| 30069 | 67329  | 67554  | 1.05E-06  | 0.96 |
| 30069 | 120560 | 121059 | 1.43E-16  | 0.88 |
| 30069 | 163704 | 164392 | 1.07E-28  | 0.91 |
| 30069 | 202709 | 202998 | 1.04E-11  | 0.85 |
| 30069 | 230081 | 230427 | 2.59E-06  | 0.72 |
| 30069 | 269517 | 269890 | 2.55E-16  | 0.77 |
| 30069 | 269540 | 269946 | 1.78E-17  | 0.79 |
| 30069 | 277661 | 278162 | 8.25E-07  | 0.96 |
| 30069 | 304692 | 304908 | 1.49E-09  | 0.7  |
| 30069 | 305125 | 305592 | 3.05E-27  | 0.92 |
| 30069 | 353396 | 354093 | 1.16E-63  | 0.93 |
| 30069 | 375171 | 375410 | 9.37E-07  | 0.86 |
| 30069 | 406979 | 407577 | 2.53E-21  | 0.96 |
| 30069 | 417611 | 417919 | 3.29E-47  | 0.92 |
| 30069 | 417798 | 418520 | 2.07E-07  | 0.89 |
| 30070 | 8730   | 9029   | 4.47E-31  | 0.96 |
| 30070 | 9699   | 9940   | 1.95E-12  | 0.73 |
| 30070 | 11881  | 12271  | 3.50E-32  | 0.92 |
| 30070 | 38402  | 38654  | 2.08E-09  | 0.98 |
| 30070 | 49807  | 50019  | 4.79E-11  | 0.94 |
| 30070 | 60637  | 60983  | 1.14E-06  | 0.66 |
| 30070 | 79384  | 79744  | 2.80E-09  | 0.72 |
| 30070 | 80126  | 81543  | 2.41E-37  | 0.75 |
| 30070 | 82677  | 83355  | 1.43E-14  | 0.77 |
| 30070 | 84040  | 84546  | 2.30E-11  | 0.65 |
| 30071 | 7809   | 8052   | 2.67E-14  | 0.95 |
| 30071 | 22231  | 22902  | 1.60E-71  | 0.77 |
| 30071 | 27063  | 28082  | 1.17E-58  | 0.78 |
| 30071 | 29583  | 29886  | 6.10E-67  | 0.93 |
| 30071 | 30147  | 30406  | 6.43E-51  | 0.84 |
| 30071 | 30618  | 30856  | 7.65E-42  | 0.96 |
| 30071 | 31201  | 32519  | 1.94E-85  | 0.6  |
| 30071 | 60826  | 61620  | 1.04E-30  | 0.73 |
| 30071 | 71028  | 71411  | 1.87E-35  | 0.7  |
| 30071 | 94517  | 95486  | 1.12E-32  | 0.73 |
| 30071 | 99782  | 100031 | 1.12E-13  | 0.9  |
| 30071 | 103022 | 104559 | 2.20E-52  | 0.86 |
| 30071 | 104792 | 105255 | 2.04E-19  | 0.74 |
| 30071 | 119893 | 121077 | 3.12E-191 | 0.95 |
| 30071 | 142625 | 143183 | 2.09E-24  | 0.93 |
| 30071 | 190282 | 190845 | 3.94E-20  | 0.76 |
| 30071 | 219949 | 220169 | 1.83E-52  | 0.94 |
| 30071 | 220921 | 221352 | 6.09E-22  | 0.97 |
| 30071 | 222425 | 222714 | 2.17E-24  | 0.64 |
| 30071 | 236148 | 236364 | 4.52E-51  | 0.88 |
| 30072 | 13715  | 14142  | 2.62E-07  | 0.77 |
| 30072 | 19610  | 20174  | 2.86E-09  | 0.63 |

|       |        |        |          |      |
|-------|--------|--------|----------|------|
| 30072 | 55424  | 55834  | 2.14E-39 | 0.77 |
| 30072 | 56556  | 56935  | 2.11E-15 | 0.7  |
| 30072 | 58111  | 58661  | 2.52E-12 | 0.82 |
| 30072 | 58913  | 59597  | 9.58E-20 | 0.9  |
| 30072 | 62112  | 62452  | 8.04E-14 | 0.8  |
| 30072 | 62943  | 63389  | 1.03E-11 | 0.82 |
| 30072 | 127759 | 128648 | 8.46E-37 | 0.89 |
| 30072 | 143829 | 144125 | 3.95E-25 | 0.87 |
| 30072 | 148287 | 149435 | 8.13E-39 | 0.63 |
| 30072 | 157362 | 157864 | 2.34E-22 | 0.83 |
| 30072 | 158596 | 158912 | 2.57E-23 | 0.89 |
| 30072 | 159305 | 160174 | 4.21E-56 | 0.91 |
| 30072 | 170899 | 171951 | 1.92E-31 | 0.81 |
| 30072 | 175861 | 176614 | 1.23E-34 | 0.72 |
| 30072 | 181721 | 182180 | 1.94E-44 | 0.83 |
| 30072 | 182398 | 183382 | 2.89E-84 | 0.89 |
| 30072 | 183669 | 184199 | 7.12E-66 | 0.77 |
| 30072 | 187368 | 188130 | 3.39E-51 | 0.87 |
| 30072 | 188394 | 189123 | 5.40E-42 | 0.82 |
| 30072 | 189432 | 189634 | 4.63E-48 | 0.88 |
| 30072 | 190675 | 191589 | 9.44E-53 | 0.62 |
| 30072 | 197826 | 198271 | 9.44E-22 | 0.78 |
| 30072 | 234444 | 234706 | 4.24E-16 | 0.86 |
| 30072 | 234952 | 235939 | 1.57E-55 | 0.92 |
| 30072 | 236570 | 236993 | 1.20E-26 | 0.88 |
| 30072 | 249132 | 249893 | 1.07E-30 | 0.71 |
| 30072 | 276014 | 276946 | 4.39E-57 | 0.61 |
| 30072 | 288689 | 289417 | 3.94E-49 | 0.94 |
| 30072 | 289711 | 290682 | 1.50E-26 | 0.78 |
| 30072 | 310788 | 311382 | 1.57E-21 | 0.79 |
| 30072 | 333025 | 334144 | 1.59E-44 | 0.62 |
| 30072 | 334379 | 334710 | 1.50E-60 | 0.92 |
| 30072 | 336692 | 337522 | 8.14E-73 | 0.89 |
| 30072 | 373621 | 373894 | 5.11E-32 | 0.92 |
| 30072 | 374557 | 375216 | 1.37E-39 | 0.88 |
| 30072 | 383553 | 384064 | 5.41E-27 | 0.86 |
| 30073 | 12384  | 13307  | 2.27E-29 | 0.76 |
| 30073 | 13520  | 14534  | 2.26E-51 | 0.92 |
| 30073 | 32195  | 32650  | 6.91E-12 | 0.69 |
| 30073 | 50587  | 51008  | 2.83E-15 | 0.85 |
| 30073 | 67298  | 67563  | 3.94E-13 | 0.82 |
| 30073 | 109593 | 110018 | 3.53E-21 | 0.84 |
| 30073 | 110412 | 110707 | 6.69E-15 | 0.81 |
| 30073 | 111792 | 112229 | 1.93E-30 | 0.92 |
| 30073 | 130258 | 130675 | 6.61E-24 | 0.91 |
| 30073 | 144782 | 146334 | 2.24E-90 | 0.91 |
| 30073 | 153369 | 153857 | 4.56E-18 | 0.8  |
| 30073 | 158326 | 158793 | 2.21E-34 | 0.9  |
| 30073 | 158998 | 159242 | 3.25E-41 | 0.94 |
| 30073 | 159593 | 160016 | 5.53E-10 | 0.71 |
| 30073 | 201870 | 202308 | 7.92E-25 | 0.85 |
| 30073 | 208716 | 209205 | 6.51E-15 | 0.78 |
| 30073 | 210065 | 210507 | 2.33E-49 | 0.89 |

|       |        |        |           |      |
|-------|--------|--------|-----------|------|
| 30073 | 213996 | 214313 | 3.16E-20  | 0.81 |
| 30073 | 241781 | 242479 | 1.40E-50  | 0.94 |
| 30073 | 242825 | 243905 | 3.11E-56  | 0.79 |
| 30073 | 251214 | 251541 | 7.33E-17  | 0.77 |
| 30073 | 256750 | 257005 | 1.36E-18  | 0.9  |
| 30073 | 278186 | 278983 | 7.21E-44  | 0.9  |
| 30073 | 279336 | 279822 | 8.09E-32  | 0.88 |
| 30073 | 281574 | 282393 | 1.32E-65  | 0.85 |
| 30073 | 283111 | 283588 | 1.39E-20  | 0.75 |
| 30073 | 284639 | 285125 | 2.75E-24  | 0.9  |
| 30073 | 285342 | 286962 | 3.85E-87  | 0.87 |
| 30073 | 290883 | 292074 | 4.23E-110 | 0.9  |
| 30073 | 302502 | 304138 | 1.19E-75  | 0.8  |
| 30073 | 304403 | 304799 | 5.98E-35  | 0.94 |
| 30073 | 305753 | 306145 | 3.00E-14  | 0.8  |
| 30073 | 314923 | 315534 | 2.53E-25  | 0.82 |
| 30073 | 329200 | 330122 | 1.97E-35  | 0.75 |
| 30073 | 330453 | 331920 | 3.65E-65  | 0.84 |
| 30073 | 333764 | 334432 | 4.49E-29  | 0.84 |
| 30073 | 342387 | 342946 | 2.41E-37  | 0.79 |
| 30073 | 345501 | 345801 | 6.06E-26  | 0.8  |
| 30073 | 353691 | 354298 | 3.25E-22  | 0.82 |
| 30073 | 355297 | 355934 | 5.17E-26  | 0.81 |
| 30073 | 356170 | 356715 | 2.83E-36  | 0.83 |
| 30073 | 358223 | 359306 | 6.89E-53  | 0.86 |
| 30073 | 364414 | 366375 | 1.28E-89  | 0.85 |
| 30073 | 373298 | 374118 | 4.40E-38  | 0.73 |
| 30073 | 392610 | 394904 | 2.38E-51  | 0.81 |
| 30073 | 420377 | 421606 | 2.05E-40  | 0.77 |
| 30073 | 459956 | 461078 | 5.43E-67  | 0.8  |
| 30073 | 461364 | 462087 | 7.33E-44  | 0.89 |
| 30073 | 473210 | 474170 | 5.27E-44  | 0.81 |
| 30073 | 477332 | 477543 | 1.14E-12  | 0.75 |
| 30073 | 478384 | 479104 | 1.88E-36  | 0.84 |
| 30073 | 506837 | 507239 | 4.92E-17  | 0.67 |
| 30073 | 509258 | 509857 | 4.40E-14  | 0.6  |
| 30073 | 556623 | 557134 | 1.39E-13  | 0.62 |
| 30073 | 571538 | 572016 | 8.63E-25  | 0.88 |
| 30073 | 584121 | 585959 | 5.07E-80  | 0.75 |
| 30073 | 586445 | 587219 | 2.51E-23  | 0.8  |
| 30073 | 591028 | 591344 | 6.56E-13  | 0.92 |
| 30073 | 601064 | 601552 | 6.03E-31  | 0.82 |
| 30073 | 601842 | 602554 | 6.30E-46  | 0.83 |
| 30073 | 604006 | 605194 | 1.13E-32  | 0.6  |
| 30073 | 618583 | 619866 | 5.00E-71  | 0.85 |
| 30073 | 624397 | 625090 | 1.68E-47  | 0.89 |
| 30073 | 644417 | 644895 | 2.80E-26  | 1    |
| 30073 | 662243 | 663037 | 5.94E-96  | 0.79 |
| 30073 | 670895 | 671324 | 5.50E-15  | 0.81 |
| 30073 | 672076 | 672932 | 1.67E-23  | 0.72 |
| 30073 | 682991 | 683280 | 1.09E-05  | 0.72 |
| 30073 | 695041 | 695482 | 4.33E-35  | 0.92 |
| 30073 | 699693 | 700243 | 3.09E-22  | 0.86 |

|       |        |        |           |      |
|-------|--------|--------|-----------|------|
| 30073 | 726738 | 727210 | 1.32E-17  | 0.8  |
| 30073 | 728093 | 728428 | 4.26E-13  | 0.81 |
| 30073 | 746333 | 746554 | 8.38E-15  | 0.83 |
| 30073 | 752317 | 752840 | 1.75E-32  | 0.62 |
| 30073 | 757172 | 758190 | 3.30E-32  | 0.68 |
| 30073 | 758982 | 759493 | 2.55E-20  | 0.71 |
| 30073 | 761625 | 761908 | 1.36E-25  | 0.9  |
| 30073 | 783682 | 783927 | 4.02E-04  | 0.39 |
| 30073 | 793633 | 794026 | 3.85E-08  | 0.94 |
| 30073 | 799612 | 801051 | 5.15E-24  | 0.6  |
| 30073 | 803217 | 803671 | 1.01E-07  | 0.83 |
| 30073 | 806414 | 808553 | 1.43E-70  | 0.71 |
| 30073 | 827140 | 827641 | 2.60E-15  | 0.62 |
| 30073 | 833987 | 834214 | 2.99E-17  | 0.9  |
| 30073 | 836062 | 836305 | 6.72E-15  | 0.71 |
| 30073 | 851063 | 851596 | 1.60E-15  | 0.81 |
| 30073 | 875829 | 876149 | 6.70E-05  | 0.66 |
| 30074 | 8826   | 9079   | 2.21E-35  | 0.94 |
| 30074 | 30436  | 30716  | 1.15E-13  | 0.77 |
| 30074 | 36408  | 37029  | 1.81E-26  | 0.82 |
| 30074 | 37235  | 37679  | 1.47E-30  | 0.9  |
| 30074 | 57210  | 58197  | 5.38E-38  | 0.76 |
| 30074 | 60034  | 60370  | 5.45E-16  | 0.64 |
| 30074 | 66059  | 66401  | 2.50E-23  | 0.83 |
| 30074 | 66625  | 66962  | 1.15E-26  | 0.83 |
| 30074 | 67212  | 67806  | 1.34E-23  | 0.79 |
| 30074 | 69172  | 69889  | 1.92E-60  | 0.67 |
| 30074 | 97066  | 97721  | 1.50E-25  | 0.84 |
| 30074 | 135506 | 135998 | 3.84E-14  | 0.61 |
| 30074 | 144378 | 144709 | 4.68E-11  | 0.66 |
| 30074 | 147747 | 149486 | 2.49E-117 | 0.67 |
| 30074 | 149821 | 150191 | 5.71E-21  | 0.74 |
| 30074 | 179033 | 180519 | 6.75E-67  | 0.84 |
| 30074 | 181991 | 182609 | 3.59E-40  | 0.83 |
| 30074 | 192196 | 193142 | 6.30E-31  | 0.77 |
| 30074 | 198817 | 199590 | 6.98E-105 | 0.88 |
| 30074 | 210237 | 210588 | 2.17E-09  | 0.93 |
| 30074 | 212085 | 212477 | 1.77E-06  | 0.71 |
| 30074 | 220003 | 220264 | 9.38E-16  | 0.85 |
| 30074 | 223457 | 224031 | 5.10E-12  | 0.74 |
| 30074 | 226210 | 226441 | 4.43E-26  | 0.76 |
| 30074 | 246547 | 247063 | 5.28E-16  | 0.84 |
| 30074 | 267257 | 267492 | 1.88E-13  | 0.67 |
| 30074 | 284705 | 285835 | 3.19E-33  | 0.8  |
| 30074 | 286914 | 287291 | 2.81E-17  | 0.7  |
| 30074 | 290117 | 291893 | 8.75E-51  | 0.78 |
| 30074 | 292814 | 293996 | 1.39E-55  | 0.85 |
| 30074 | 295078 | 295344 | 1.13E-14  | 0.81 |
| 30074 | 305331 | 305606 | 5.59E-13  | 0.86 |
| 30074 | 324218 | 324478 | 2.17E-27  | 0.84 |
| 30074 | 335820 | 337197 | 1.21E-81  | 0.78 |
| 30074 | 343120 | 343540 | 2.64E-32  | 0.86 |
| 30074 | 349116 | 349412 | 9.09E-50  | 0.94 |

|       |        |        |          |      |
|-------|--------|--------|----------|------|
| 30074 | 349648 | 350078 | 1.10E-36 | 0.94 |
| 30074 | 356098 | 356333 | 2.29E-04 | 0    |
| 30074 | 382430 | 382977 | 2.13E-34 | 0.86 |
| 30074 | 383506 | 384395 | 6.34E-47 | 0.94 |
| 30074 | 384762 | 385163 | 8.95E-50 | 0.87 |
| 30074 | 386869 | 387194 | 1.19E-08 | 0.61 |
| 30074 | 402018 | 402314 | 7.83E-05 | 0.83 |
| 30074 | 404301 | 404732 | 6.60E-16 | 0.95 |
| 30074 | 405008 | 405271 | 1.38E-33 | 0.96 |
| 30074 | 406529 | 406757 | 7.87E-27 | 0.93 |
| 30074 | 407885 | 408359 | 6.67E-37 | 0.83 |
| 30074 | 473264 | 473938 | 2.64E-27 | 0.79 |
| 30074 | 479297 | 479608 | 8.01E-16 | 0.8  |
| 30074 | 498778 | 500922 | 1.21E-97 | 0.79 |
| 30074 | 529626 | 530298 | 5.25E-38 | 0.96 |
| 30074 | 538712 | 539180 | 7.27E-31 | 0.84 |
| 30074 | 539453 | 541785 | 2.01E-62 | 0.78 |
| 30074 | 552709 | 553436 | 1.39E-17 | 0.66 |
| 30074 | 558212 | 558567 | 3.97E-23 | 0.81 |
| 30074 | 558774 | 559218 | 8.42E-58 | 0.94 |
| 30074 | 563475 | 564058 | 2.60E-08 | 0.85 |
| 30074 | 564305 | 564686 | 2.15E-12 | 0.74 |
| 30074 | 581178 | 581795 | 6.62E-46 | 0.77 |
| 30074 | 599696 | 600089 | 1.50E-26 | 0.92 |
| 30074 | 639310 | 639633 | 1.14E-20 | 0.68 |
| 30074 | 639844 | 641080 | 1.39E-54 | 0.72 |
| 30074 | 660397 | 661315 | 4.58E-17 | 0.82 |
| 30074 | 662273 | 662733 | 1.28E-14 | 0.94 |
| 30074 | 663772 | 664220 | 5.29E-16 | 0.66 |
| 30075 | 11369  | 11834  | 2.23E-29 | 0.8  |
| 30075 | 12561  | 12911  | 4.58E-20 | 0.87 |
| 30075 | 21847  | 22159  | 4.74E-19 | 0.79 |
| 30075 | 26462  | 27295  | 3.32E-22 | 0.83 |
| 30075 | 28804  | 29248  | 1.06E-34 | 0.89 |
| 30075 | 58974  | 59762  | 6.56E-90 | 0.94 |
| 30075 | 60079  | 61958  | 2.13E-28 | 0.69 |
| 30075 | 81257  | 81502  | 6.77E-16 | 0.78 |
| 30075 | 87114  | 87774  | 3.28E-19 | 0.66 |
| 30075 | 116736 | 117852 | 2.01E-45 | 0.77 |
| 30075 | 178494 | 179112 | 3.14E-16 | 0.68 |
| 30075 | 188675 | 188978 | 5.44E-25 | 0.95 |
| 30075 | 204961 | 205633 | 1.47E-52 | 0.85 |
| 30075 | 205949 | 206591 | 1.01E-35 | 0.9  |
| 30075 | 208162 | 208538 | 1.58E-25 | 0.89 |
| 30075 | 208793 | 209365 | 5.31E-32 | 0.9  |
| 30075 | 211131 | 211441 | 5.51E-20 | 0.9  |
| 30075 | 216453 | 216732 | 4.30E-19 | 0.89 |
| 30075 | 217655 | 218268 | 4.29E-42 | 0.86 |
| 30075 | 233623 | 234140 | 8.82E-10 | 0.79 |
| 30075 | 239907 | 240119 | 9.28E-20 | 0.77 |
| 30075 | 245004 | 245521 | 2.53E-09 | 0.69 |
| 30075 | 252045 | 253278 | 3.96E-62 | 0.77 |
| 30075 | 273938 | 274198 | 8.99E-26 | 0.8  |

|       |        |        |           |      |
|-------|--------|--------|-----------|------|
| 30075 | 275538 | 276098 | 2.82E-15  | 0.83 |
| 30075 | 281734 | 282650 | 1.81E-27  | 0.73 |
| 30075 | 296470 | 297188 | 1.35E-30  | 0.88 |
| 30075 | 300137 | 300470 | 1.38E-21  | 0.93 |
| 30075 | 303871 | 304474 | 2.05E-50  | 0.8  |
| 30075 | 306281 | 306966 | 2.72E-30  | 0.64 |
| 30075 | 315347 | 315681 | 8.73E-19  | 0.87 |
| 30075 | 319318 | 320002 | 9.15E-47  | 0.89 |
| 30075 | 326338 | 327483 | 1.30E-44  | 0.82 |
| 30075 | 331313 | 331636 | 5.07E-33  | 0.73 |
| 30075 | 331551 | 331850 | 4.47E-29  | 0.78 |
| 30075 | 332074 | 332758 | 2.97E-32  | 0.66 |
| 30075 | 341937 | 342506 | 2.23E-74  | 0.91 |
| 30075 | 343473 | 343963 | 1.09E-38  | 0.88 |
| 30075 | 344183 | 344574 | 1.84E-23  | 0.89 |
| 30075 | 344972 | 345467 | 7.10E-43  | 0.84 |
| 30075 | 379154 | 379458 | 8.58E-10  | 0.8  |
| 30075 | 389861 | 390286 | 3.07E-52  | 0.78 |
| 30075 | 391502 | 392057 | 1.86E-52  | 0.95 |
| 30075 | 399739 | 400807 | 3.46E-64  | 0.86 |
| 30075 | 411172 | 411737 | 4.17E-10  | 0.7  |
| 30075 | 413163 | 413533 | 2.56E-13  | 0.82 |
| 30075 | 441109 | 441372 | 9.65E-16  | 0.84 |
| 30075 | 455971 | 456334 | 1.66E-17  | 0.79 |
| 30075 | 462373 | 462847 | 4.46E-08  | 0.75 |
| 30075 | 465801 | 466194 | 6.29E-51  | 0.93 |
| 30075 | 472442 | 472776 | 5.78E-24  | 0.94 |
| 30075 | 495871 | 498558 | 4.40E-98  | 0.82 |
| 30075 | 500349 | 500625 | 1.51E-14  | 0.81 |
| 30075 | 504606 | 504957 | 1.15E-32  | 0.77 |
| 30075 | 513540 | 514307 | 7.59E-61  | 0.84 |
| 30075 | 514909 | 515854 | 1.35E-48  | 0.82 |
| 30075 | 523012 | 523274 | 5.61E-16  | 0.9  |
| 30075 | 523645 | 524126 | 3.91E-46  | 0.86 |
| 30075 | 524496 | 525351 | 1.33E-31  | 0.8  |
| 30075 | 534448 | 535100 | 1.29E-25  | 0.76 |
| 30075 | 547327 | 547724 | 5.34E-21  | 0.73 |
| 30075 | 555070 | 555404 | 1.54E-25  | 0.93 |
| 30075 | 564068 | 564593 | 9.39E-45  | 0.92 |
| 30076 | 28628  | 29510  | 1.76E-28  | 0.74 |
| 30076 | 37063  | 37573  | 1.60E-74  | 0.8  |
| 30076 | 37879  | 38155  | 6.62E-21  | 0.84 |
| 30076 | 41838  | 42907  | 2.18E-39  | 0.76 |
| 30076 | 56467  | 56776  | 6.07E-53  | 0.96 |
| 30076 | 143737 | 144166 | 6.04E-25  | 0.91 |
| 30076 | 150757 | 151039 | 7.46E-22  | 0.82 |
| 30076 | 153799 | 154447 | 1.37E-23  | 0.78 |
| 30076 | 176481 | 177684 | 9.00E-127 | 0.93 |
| 30076 | 178024 | 179296 | 2.11E-58  | 0.9  |
| 30076 | 180467 | 180762 | 2.32E-21  | 0.93 |
| 30076 | 181172 | 181611 | 6.46E-41  | 0.84 |
| 30076 | 247571 | 248552 | 5.96E-61  | 0.78 |
| 30076 | 249153 | 249869 | 1.29E-71  | 0.89 |

|       |         |         |           |      |
|-------|---------|---------|-----------|------|
| 30076 | 266959  | 267397  | 9.42E-40  | 0.88 |
| 30076 | 267598  | 267922  | 2.62E-16  | 0.72 |
| 30076 | 270292  | 270533  | 6.03E-47  | 0.72 |
| 30076 | 296783  | 297044  | 6.53E-34  | 0.91 |
| 30076 | 304367  | 305034  | 2.37E-68  | 0.85 |
| 30076 | 312849  | 314099  | 5.40E-49  | 0.77 |
| 30076 | 318520  | 319474  | 9.14E-30  | 0.79 |
| 30076 | 344405  | 345400  | 7.88E-97  | 0.9  |
| 30076 | 356217  | 357852  | 6.42E-96  | 0.63 |
| 30076 | 364481  | 365106  | 1.19E-43  | 0.9  |
| 30076 | 378906  | 380409  | 5.37E-56  | 0.76 |
| 30076 | 382608  | 382960  | 3.59E-59  | 0.96 |
| 30076 | 383336  | 383540  | 2.55E-12  | 0.91 |
| 30076 | 385126  | 385355  | 2.05E-19  | 0.69 |
| 30076 | 424140  | 424343  | 1.04E-36  | 0.86 |
| 30076 | 424957  | 425543  | 4.70E-43  | 0.8  |
| 30076 | 428429  | 429293  | 3.64E-28  | 0.82 |
| 30076 | 429527  | 430106  | 8.83E-26  | 0.82 |
| 30076 | 430648  | 430922  | 4.83E-20  | 0.8  |
| 30076 | 430721  | 430952  | 2.76E-26  | 0.81 |
| 30076 | 475986  | 476847  | 1.86E-31  | 0.64 |
| 30076 | 499887  | 500240  | 3.12E-04  | 0.79 |
| 30076 | 506834  | 507328  | 8.45E-15  | 0.74 |
| 30076 | 561897  | 562835  | 8.82E-34  | 0.81 |
| 30076 | 575206  | 575561  | 5.60E-08  | 0.64 |
| 30076 | 589157  | 589636  | 1.42E-13  | 0.77 |
| 30076 | 628426  | 628738  | 1.21E-57  | 0.85 |
| 30076 | 629009  | 629482  | 1.32E-123 | 0.9  |
| 30076 | 637638  | 637925  | 3.58E-08  | 0.64 |
| 30076 | 643375  | 644174  | 1.41E-31  | 0.84 |
| 30076 | 700881  | 702644  | 7.67E-94  | 0.87 |
| 30076 | 704061  | 705870  | 5.48E-65  | 0.8  |
| 30076 | 708364  | 708874  | 1.24E-21  | 0.87 |
| 30076 | 709723  | 710032  | 1.91E-11  | 0.73 |
| 30076 | 799754  | 800034  | 3.12E-34  | 0.75 |
| 30076 | 801367  | 801674  | 6.06E-21  | 0.9  |
| 30076 | 832995  | 833518  | 2.65E-36  | 0.89 |
| 30076 | 844751  | 846662  | 1.47E-131 | 0.8  |
| 30076 | 868316  | 868644  | 1.59E-15  | 0.82 |
| 30076 | 868960  | 869498  | 9.26E-22  | 0.86 |
| 30076 | 869781  | 870397  | 2.45E-23  | 0.76 |
| 30076 | 889334  | 889598  | 1.56E-24  | 0.88 |
| 30076 | 894950  | 896678  | 3.29E-110 | 0.71 |
| 30076 | 911028  | 912267  | 3.68E-62  | 0.84 |
| 30076 | 912472  | 912727  | 9.04E-26  | 0.83 |
| 30076 | 915746  | 916284  | 7.78E-20  | 0.86 |
| 30076 | 922109  | 923599  | 8.99E-70  | 0.79 |
| 30076 | 951835  | 952345  | 7.78E-18  | 0.81 |
| 30076 | 982772  | 983002  | 1.59E-19  | 0.88 |
| 30076 | 1000027 | 1000545 | 5.05E-49  | 0.91 |
| 30076 | 1001005 | 1001252 | 4.54E-43  | 0.92 |
| 30076 | 1002280 | 1003419 | 1.77E-34  | 0.75 |
| 30076 | 1067013 | 1067353 | 2.35E-19  | 0.76 |

|       |         |         |           |      |
|-------|---------|---------|-----------|------|
| 30076 | 1070106 | 1070721 | 1.74E-25  | 0.78 |
| 30076 | 1073450 | 1073715 | 1.54E-26  | 0.86 |
| 30076 | 1081764 | 1083267 | 7.31E-28  | 0.68 |
| 30076 | 1085024 | 1085745 | 2.46E-52  | 0.8  |
| 30076 | 1086038 | 1086496 | 8.59E-25  | 0.85 |
| 30076 | 1154907 | 1155181 | 4.66E-10  | 0.76 |
| 30076 | 1160051 | 1160844 | 2.93E-40  | 0.87 |
| 30076 | 1176590 | 1179798 | 5.33E-120 | 0.77 |
| 30076 | 1219252 | 1219854 | 7.30E-16  | 0.81 |
| 30076 | 1227921 | 1228488 | 2.65E-44  | 0.8  |
| 30076 | 1233442 | 1233917 | 4.88E-23  | 0.85 |
| 30076 | 1238663 | 1239323 | 3.69E-40  | 0.93 |
| 30076 | 1239715 | 1240428 | 1.11E-32  | 0.87 |
| 30076 | 1277592 | 1277848 | 1.01E-10  | 0.77 |
| 30076 | 1305898 | 1306970 | 1.26E-56  | 0.87 |
| 30076 | 1311107 | 1311707 | 2.72E-29  | 0.95 |
| 30076 | 1313168 | 1313507 | 4.20E-18  | 0.88 |
| 30076 | 1313847 | 1314077 | 1.53E-16  | 0.79 |
| 30076 | 1319988 | 1320414 | 2.70E-27  | 0.62 |
| 30076 | 1320669 | 1321665 | 1.32E-102 | 0.94 |
| 30076 | 1322127 | 1322849 | 2.71E-32  | 0.76 |
| 30076 | 1328370 | 1328736 | 7.88E-16  | 0.81 |
| 30076 | 1332946 | 1333685 | 6.45E-49  | 0.9  |
| 30076 | 1339300 | 1340172 | 1.98E-38  | 0.8  |
| 30076 | 1341471 | 1341784 | 4.56E-27  | 0.82 |
| 30076 | 1342002 | 1342243 | 1.88E-36  | 0.94 |
| 30076 | 1363373 | 1364477 | 1.64E-45  | 0.68 |
| 30076 | 1366605 | 1367144 | 4.24E-43  | 0.86 |
| 30076 | 1367428 | 1368519 | 6.07E-81  | 0.74 |
| 30076 | 1373516 | 1374157 | 1.82E-125 | 0.89 |
| 30076 | 1374374 | 1375180 | 5.29E-102 | 0.91 |
| 30076 | 1375421 | 1376038 | 2.43E-41  | 0.63 |
| 30076 | 1378223 | 1378833 | 3.00E-47  | 0.86 |
| 30076 | 1382308 | 1382545 | 3.35E-08  | 0.65 |
| 30076 | 1406028 | 1406338 | 8.34E-23  | 0.9  |
| 30076 | 1421095 | 1421600 | 3.96E-15  | 0.83 |
| 30076 | 1422290 | 1422506 | 7.92E-24  | 0.85 |
| 30076 | 1422779 | 1424033 | 6.00E-174 | 0.91 |
| 30076 | 1424284 | 1425343 | 1.73E-54  | 0.73 |
| 30076 | 1452230 | 1452652 | 4.93E-31  | 0.7  |
| 30076 | 1460890 | 1461725 | 1.84E-122 | 0.93 |
| 30076 | 1463328 | 1464386 | 1.50E-87  | 0.85 |
| 30076 | 1464655 | 1465506 | 2.38E-100 | 0.86 |
| 30076 | 1466201 | 1467295 | 8.31E-114 | 0.79 |
| 30076 | 1484842 | 1485969 | 2.26E-69  | 0.76 |
| 30076 | 1490559 | 1490940 | 3.01E-16  | 0.77 |
| 30076 | 1495344 | 1495871 | 7.01E-25  | 0.77 |
| 30076 | 1513744 | 1514048 | 2.80E-15  | 0.6  |
| 30076 | 1571606 | 1573143 | 1.11E-45  | 0.63 |
| 30076 | 1576104 | 1576698 | 2.56E-23  | 0.76 |
| 30076 | 1600496 | 1601154 | 2.48E-48  | 0.7  |
| 30076 | 1605859 | 1606529 | 8.84E-22  | 0.86 |
| 30076 | 1614850 | 1615413 | 7.92E-16  | 0.76 |



|       |         |         |           |      |
|-------|---------|---------|-----------|------|
| 30076 | 1642847 | 1643055 | 1.91E-16  | 0.84 |
| 30076 | 1645172 | 1645535 | 1.34E-16  | 0.92 |
| 30076 | 1645837 | 1646270 | 2.23E-38  | 0.89 |
| 30076 | 1649178 | 1649601 | 1.03E-21  | 0.68 |
| 30076 | 1655427 | 1655834 | 1.67E-20  | 0.79 |
| 30076 | 1695714 | 1696036 | 3.44E-47  | 0.91 |
| 30077 | 164807  | 165021  | 3.67E-12  | 0.8  |
| 30078 | 13447   | 15396   | 1.19E-84  | 0.69 |
| 30078 | 18022   | 18309   | 3.74E-12  | 0.78 |
| 30078 | 31340   | 31672   | 8.22E-27  | 0.85 |
| 30078 | 36584   | 36977   | 2.27E-17  | 0.68 |
| 30078 | 77546   | 78269   | 6.13E-47  | 0.96 |
| 30078 | 82032   | 82265   | 8.19E-19  | 0.86 |
| 30078 | 95971   | 96437   | 3.75E-37  | 0.86 |
| 30078 | 96719   | 97529   | 2.55E-75  | 0.83 |
| 30078 | 108235  | 108562  | 4.12E-21  | 0.76 |
| 30078 | 164940  | 166379  | 5.21E-49  | 0.63 |
| 30078 | 183784  | 184381  | 5.32E-11  | 0.8  |
| 30078 | 202084  | 202899  | 5.34E-51  | 0.94 |
| 30078 | 203659  | 204069  | 1.56E-26  | 0.88 |
| 30078 | 205053  | 205834  | 4.95E-56  | 0.92 |
| 30078 | 212660  | 213344  | 4.58E-18  | 0.83 |
| 30078 | 214188  | 214637  | 2.79E-15  | 0.86 |
| 30078 | 214918  | 215251  | 1.81E-33  | 0.91 |
| 30078 | 235467  | 236198  | 9.86E-61  | 0.88 |
| 30078 | 245551  | 246002  | 1.73E-21  | 0.66 |
| 30078 | 246215  | 246577  | 9.87E-18  | 0.81 |
| 30078 | 247171  | 249086  | 1.45E-79  | 0.84 |
| 30078 | 249457  | 250932  | 3.47E-81  | 0.86 |
| 30078 | 254794  | 255445  | 1.10E-15  | 0.77 |
| 30078 | 257228  | 257497  | 4.19E-07  | 0.84 |
| 30078 | 260291  | 261048  | 2.61E-40  | 0.83 |
| 30078 | 262438  | 262787  | 7.57E-23  | 0.84 |
| 30078 | 267556  | 267827  | 2.20E-14  | 0.81 |
| 30078 | 276586  | 277497  | 2.57E-45  | 0.68 |
| 30078 | 301619  | 301930  | 9.50E-10  | 0.61 |
| 30078 | 343251  | 344398  | 1.21E-61  | 0.7  |
| 30078 | 378040  | 378326  | 7.74E-16  | 0.84 |
| 30078 | 397736  | 398034  | 4.63E-04  | 0.81 |
| 30078 | 424844  | 425584  | 1.19E-22  | 0.84 |
| 30078 | 437141  | 438777  | 1.53E-118 | 0.88 |
| 30078 | 441624  | 441838  | 5.16E-62  | 0.88 |
| 30078 | 444104  | 444311  | 3.79E-09  | 0.85 |
| 30078 | 445647  | 447364  | 1.13E-61  | 0.76 |
| 30078 | 470784  | 471184  | 1.23E-29  | 0.8  |
| 30078 | 512120  | 512527  | 2.98E-17  | 0.82 |
| 30078 | 519059  | 519825  | 8.20E-43  | 0.76 |
| 30078 | 548498  | 548805  | 1.08E-33  | 0.88 |
| 30078 | 549009  | 549356  | 1.15E-17  | 0.89 |
| 30078 | 555240  | 555554  | 1.11E-13  | 0.81 |
| 30078 | 567610  | 568526  | 1.32E-64  | 0.69 |
| 30078 | 597039  | 597286  | 1.88E-20  | 0.68 |
| 30078 | 614245  | 614864  | 2.04E-28  | 0.83 |

|       |        |        |           |      |
|-------|--------|--------|-----------|------|
| 30078 | 615161 | 616171 | 2.08E-44  | 0.88 |
| 30078 | 633812 | 634802 | 1.85E-32  | 0.6  |
| 30078 | 637904 | 638314 | 1.10E-32  | 0.86 |
| 30078 | 644596 | 645162 | 1.24E-47  | 0.87 |
| 30078 | 653208 | 653515 | 2.30E-18  | 0.81 |
| 30078 | 668467 | 669002 | 5.97E-34  | 0.75 |
| 30078 | 673231 | 673612 | 1.12E-15  | 0.8  |
| 30078 | 682848 | 683169 | 2.08E-12  | 0.76 |
| 30078 | 689716 | 690119 | 1.50E-21  | 0.67 |
| 30078 | 690344 | 690640 | 2.06E-10  | 0.6  |
| 30078 | 698610 | 699431 | 1.71E-49  | 0.85 |
| 30078 | 699723 | 700282 | 1.81E-49  | 0.8  |
| 30078 | 704621 | 704864 | 1.09E-10  | 0.75 |
| 30078 | 719406 | 719805 | 3.08E-36  | 0.84 |
| 30078 | 720048 | 721639 | 2.16E-138 | 0.85 |
| 30078 | 726327 | 727081 | 1.33E-40  | 0.79 |
| 30078 | 750858 | 751909 | 4.45E-53  | 0.78 |
| 30078 | 785746 | 786078 | 3.02E-32  | 0.81 |
| 30078 | 795964 | 796295 | 7.81E-12  | 0.72 |
| 30078 | 801064 | 801417 | 1.48E-34  | 0.79 |
| 30078 | 811640 | 813036 | 2.91E-157 | 0.91 |
| 30078 | 868089 | 868724 | 4.63E-18  | 0.64 |
| 30078 | 871243 | 871485 | 2.15E-08  | 0.89 |
| 30078 | 876557 | 877028 | 1.72E-32  | 0.89 |
| 30078 | 890071 | 890560 | 7.53E-46  | 0.87 |
| 30078 | 891214 | 891667 | 5.80E-18  | 0.82 |
| 30078 | 894660 | 895195 | 1.95E-13  | 0.79 |
| 30078 | 897310 | 897735 | 2.00E-22  | 0.89 |
| 30078 | 907488 | 907711 | 7.12E-12  | 0.65 |
| 30078 | 924619 | 925042 | 6.59E-20  | 0.77 |
| 30078 | 929867 | 930347 | 1.28E-45  | 0.85 |
| 30078 | 957938 | 958784 | 8.20E-38  | 0.87 |
| 30078 | 980168 | 980656 | 1.22E-23  | 0.65 |
| 30079 | 255    | 1165   | 3.08E-33  | 0.76 |
| 30079 | 25040  | 25544  | 2.33E-56  | 0.88 |
| 30079 | 25919  | 26163  | 9.09E-20  | 0.83 |
| 30079 | 30377  | 30649  | 1.40E-05  | 0.83 |
| 30079 | 31598  | 32268  | 2.26E-08  | 0.86 |
| 30079 | 34034  | 35360  | 6.45E-18  | 0.81 |
| 30079 | 37416  | 37855  | 1.14E-25  | 0.88 |
| 30079 | 62373  | 62758  | 7.54E-16  | 0.85 |
| 30079 | 63637  | 63911  | 2.34E-20  | 0.91 |
| 30079 | 76216  | 76420  | 4.20E-09  | 0.92 |
| 30079 | 79819  | 80261  | 1.43E-65  | 0.63 |
| 30079 | 94459  | 94946  | 8.81E-16  | 0.84 |
| 30079 | 107945 | 108235 | 1.00E-09  | 0.89 |
| 30079 | 129146 | 129516 | 5.18E-05  | 0.94 |
| 30079 | 142054 | 142583 | 4.38E-07  | 0.81 |
| 30079 | 142160 | 142601 | 1.70E-07  | 0.81 |
| 30079 | 142663 | 142919 | 2.75E-12  | 0.85 |
| 30079 | 154256 | 154647 | 8.56E-06  | 0.88 |
| 30079 | 185555 | 186243 | 2.18E-31  | 0.88 |
| 30079 | 189509 | 189890 | 1.14E-20  | 0.87 |

|       |        |        |          |      |
|-------|--------|--------|----------|------|
| 30079 | 213412 | 214072 | 7.62E-17 | 0.82 |
| 30079 | 227993 | 229385 | 8.85E-67 | 0.92 |
| 30079 | 230786 | 231187 | 2.97E-05 | 0.81 |
| 30079 | 245556 | 246139 | 4.53E-18 | 0.85 |
| 30079 | 249002 | 249254 | 1.86E-10 | 0.96 |
| 30079 | 281306 | 282958 | 1.18E-80 | 0.72 |
| 30079 | 373710 | 374076 | 2.07E-23 | 0.94 |
| 30079 | 434583 | 434951 | 3.03E-79 | 0.92 |
| 30079 | 435158 | 435413 | 2.40E-30 | 0.88 |
| 30079 | 435941 | 436403 | 2.14E-45 | 0.83 |
| 30079 | 443503 | 444482 | 6.45E-60 | 0.92 |
| 30079 | 444684 | 445670 | 1.50E-22 | 0.6  |
| 30079 | 469702 | 469903 | 1.69E-16 | 0.82 |
| 30079 | 473310 | 473634 | 4.60E-07 | 0.79 |
| 30079 | 473315 | 473806 | 8.45E-07 | 0.8  |
| 30079 | 478261 | 478497 | 2.83E-04 | 0.79 |
| 30079 | 699544 | 699765 | 3.52E-07 | 0.97 |
| 30084 | 5548   | 6542   | 4.19E-37 | 0.81 |
| 30084 | 17556  | 17839  | 9.32E-10 | 0.81 |
| 30084 | 30021  | 30896  | 1.92E-79 | 0.91 |
| 30084 | 43210  | 43550  | 2.12E-13 | 0.84 |
| 30084 | 68391  | 68833  | 1.02E-23 | 0.93 |
| 30084 | 69056  | 69516  | 5.38E-34 | 0.93 |
| 30084 | 80661  | 82464  | 7.59E-94 | 0.92 |
| 30084 | 94027  | 95422  | 2.51E-77 | 0.75 |
| 30084 | 108693 | 109579 | 9.85E-27 | 0.93 |
| 30084 | 123372 | 123805 | 4.24E-21 | 0.68 |
| 30085 | 19802  | 20284  | 8.80E-12 | 0.81 |
| 30085 | 24044  | 24316  | 3.98E-06 | 0.86 |
| 30085 | 78374  | 79475  | 9.29E-33 | 0.88 |
| 30085 | 79880  | 80510  | 1.39E-21 | 0.81 |
| 30085 | 88102  | 88640  | 7.62E-13 | 0.87 |
| 30085 | 97368  | 98023  | 8.87E-15 | 0.87 |
| 30085 | 111589 | 112276 | 2.51E-14 | 0.96 |
| 30086 | 53247  | 53699  | 3.96E-53 | 0.9  |
| 30086 | 54419  | 54815  | 1.37E-34 | 0.91 |
| 30086 | 55018  | 55476  | 1.01E-51 | 0.95 |
| 30086 | 85953  | 87104  | 3.05E-59 | 0.92 |
| 30086 | 103009 | 103576 | 5.72E-27 | 0.92 |
| 30086 | 106658 | 107025 | 3.48E-21 | 0.79 |
| 30086 | 107232 | 107741 | 8.09E-29 | 0.95 |
| 30086 | 108141 | 108492 | 1.64E-25 | 0.9  |
| 30086 | 109559 | 109960 | 1.37E-10 | 0.64 |
| 30086 | 168290 | 168834 | 5.61E-28 | 0.96 |
| 30086 | 173552 | 173851 | 8.12E-24 | 0.85 |
| 30086 | 174966 | 175234 | 3.54E-14 | 0.63 |
| 30086 | 188315 | 188633 | 3.41E-48 | 0.96 |
| 30086 | 189390 | 189831 | 4.61E-53 | 0.9  |
| 30086 | 204533 | 204968 | 1.72E-25 | 0.93 |
| 30086 | 207913 | 208412 | 1.00E-17 | 0.68 |
| 30088 | 14291  | 14567  | 5.98E-11 | 0.94 |
| 30088 | 63522  | 63761  | 9.54E-04 | 0.76 |
| 30088 | 79742  | 80125  | 3.06E-09 | 0.84 |

|       |         |         |            |      |
|-------|---------|---------|------------|------|
| 30088 | 123089  | 123333  | 4.02E-10   | 0.81 |
| 30088 | 136356  | 136587  | 9.50E-11   | 0.83 |
| 30088 | 157233  | 157586  | 3.54E-12   | 0.89 |
| 30088 | 162871  | 163094  | 2.27E-15   | 0.86 |
| 30088 | 192657  | 194166  | 5.38E-32   | 0.84 |
| 30088 | 234734  | 235023  | 1.01E-07   | 0.81 |
| 30088 | 237174  | 237382  | 5.75E-09   | 0.75 |
| 30088 | 237587  | 238326  | 2.36E-10   | 0.8  |
| 30088 | 293731  | 293978  | 7.09E-06   | 0.87 |
| 30088 | 302114  | 302507  | 9.23E-18   | 0.82 |
| 30089 | 8674    | 8949    | 6.96E-10   | 0.96 |
| 30089 | 19238   | 20018   | 3.96E-55   | 0.85 |
| 30089 | 21203   | 21900   | 5.77E-46   | 0.82 |
| 30089 | 65222   | 65463   | 4.05E-12   | 0.83 |
| 30089 | 78219   | 78580   | 3.26E-24   | 0.81 |
| 30089 | 119359  | 119582  | 2.80E-14   | 0.88 |
| 30089 | 131960  | 132549  | 1.54E-27   | 0.9  |
| 30089 | 137537  | 138098  | 5.46E-49   | 0.81 |
| 30089 | 168022  | 168454  | 1.61E-06   | 0.74 |
| 30089 | 245277  | 245532  | 1.38109041 | 0.82 |
| 30089 | 272625  | 273065  | 4.67E-87   | 0.93 |
| 30089 | 273333  | 273866  | 3.68E-66   | 0.99 |
| 30089 | 418339  | 418647  | 1.32E-04   | 0.88 |
| 30089 | 578188  | 579503  | 2.06E-85   | 0.95 |
| 30089 | 579804  | 580187  | 2.25E-28   | 0.63 |
| 30089 | 643353  | 643590  | 4.83E-08   | 0.76 |
| 30089 | 759206  | 759482  | 1.30E-22   | 0.94 |
| 30089 | 759882  | 760413  | 2.62E-63   | 0.95 |
| 30089 | 845939  | 846341  | 2.09E-04   | 0.74 |
| 30089 | 877182  | 877475  | 9.02E-07   | 0.95 |
| 30089 | 907003  | 907336  | 1.97E-03   | 0.8  |
| 30089 | 939708  | 940073  | 8.35E-08   | 0.8  |
| 30089 | 941947  | 942209  | 1.00E-32   | 0.85 |
| 30089 | 956783  | 957441  | 9.73E-08   | 0.96 |
| 30089 | 1064185 | 1064507 | 8.17E-24   | 0.85 |
| 30089 | 1065411 | 1065820 | 1.57E-33   | 0.86 |
| 30089 | 1120571 | 1120884 | 2.09E-15   | 0.84 |
| 30089 | 1131946 | 1132454 | 5.19E-28   | 0.93 |
| 30089 | 1133842 | 1134733 | 6.31E-19   | 0.76 |
| 30089 | 1191355 | 1191734 | 1.72E-18   | 0.91 |
| 30089 | 1195338 | 1195889 | 8.45E-26   | 0.91 |
| 30089 | 1197030 | 1197323 | 7.31E-50   | 0.97 |
| 30089 | 1208933 | 1209159 | 5.86E-08   | 0.9  |
| 30089 | 1262493 | 1263603 | 5.56E-47   | 0.81 |
| 30089 | 1264326 | 1264588 | 2.52E-32   | 0.93 |
| 30089 | 1265272 | 1265680 | 2.47E-28   | 0.83 |
| 30089 | 1269249 | 1270032 | 2.08E-37   | 0.84 |
| 30089 | 1270597 | 1270877 | 6.94E-25   | 0.91 |
| 30089 | 1271147 | 1272303 | 3.73E-120  | 0.95 |
| 30089 | 1277118 | 1277351 | 2.64E-08   | 0.88 |
| 30089 | 1285106 | 1285731 | 5.09E-07   | 0.95 |
| 30089 | 1333449 | 1333880 | 5.53E-16   | 0.85 |
| 30089 | 1343079 | 1343385 | 2.87E-49   | 0.9  |

|       |         |         |           |      |
|-------|---------|---------|-----------|------|
| 30089 | 1386652 | 1386873 | 1.17E-07  | 0.82 |
| 30089 | 1474841 | 1475081 | 1.38E-25  | 0.83 |
| 30089 | 1477121 | 1477837 | 7.50E-28  | 0.72 |
| 30089 | 1507175 | 1507665 | 4.41E-05  | 0.93 |
| 30089 | 1513850 | 1514163 | 3.47E-05  | 0.71 |
| 30089 | 1572204 | 1572574 | 3.41E-06  | 0.88 |
| 30090 | 675     | 1330    | 2.80E-09  | 0.66 |
| 30090 | 43126   | 44021   | 1.94E-79  | 0.78 |
| 30090 | 91876   | 92145   | 1.16E-12  | 0.83 |
| 30090 | 139584  | 139922  | 3.96E-26  | 0.87 |
| 30090 | 140238  | 140572  | 1.70E-17  | 0.82 |
| 30090 | 145665  | 147178  | 4.61E-78  | 0.89 |
| 30090 | 147433  | 147959  | 2.10E-51  | 0.95 |
| 30091 | 5152    | 5567    | 2.07E-65  | 0.86 |
| 30091 | 5966    | 6299    | 3.10E-44  | 0.84 |
| 30091 | 68703   | 69059   | 2.32E-31  | 0.85 |
| 30091 | 76904   | 77254   | 1.25E-22  | 0.89 |
| 30091 | 85253   | 85603   | 4.01E-16  | 0.85 |
| 30091 | 120140  | 120590  | 4.06E-19  | 0.93 |
| 30091 | 124654  | 125295  | 3.56E-21  | 0.79 |
| 30091 | 185124  | 185720  | 5.45E-54  | 0.89 |
| 30091 | 197716  | 198133  | 1.16E-65  | 0.94 |
| 30092 | 10625   | 11009   | 1.36E-05  | 0.86 |
| 30092 | 10946   | 11320   | 3.89E-12  | 0.9  |
| 30092 | 11509   | 11780   | 3.55E-05  | 0.87 |
| 30092 | 13477   | 13800   | 8.53E-13  | 0.84 |
| 30092 | 45826   | 46174   | 2.93E-10  | 0.88 |
| 30092 | 46534   | 46826   | 1.50E-07  | 0.84 |
| 30092 | 46606   | 46941   | 6.01E-11  | 0.88 |
| 30092 | 48950   | 49745   | 7.54E-105 | 0.92 |
| 30092 | 52159   | 52405   | 1.36E-05  | 0.81 |
| 30092 | 66620   | 66834   | 4.31E-09  | 0.83 |
| 30092 | 70251   | 70532   | 8.48E-13  | 0.86 |
| 30092 | 96718   | 96925   | 4.87E-13  | 0.9  |
| 30092 | 118552  | 118887  | 9.15E-06  | 1    |
| 30092 | 119787  | 120018  | 1.05E-06  | 0.8  |
| 30092 | 123204  | 123590  | 4.08E-05  | 0.81 |
| 30092 | 171464  | 171812  | 1.49E-04  | 0.69 |
| 30092 | 171899  | 172381  | 9.50E-08  | 0.82 |
| 30092 | 180099  | 180870  | 7.25E-10  | 0.75 |
| 30092 | 186813  | 187227  | 2.76E-05  | 0.91 |
| 30092 | 190677  | 190978  | 1.02E-37  | 0.76 |
| 30092 | 191804  | 192020  | 4.14E-15  | 0.85 |
| 30092 | 203247  | 203554  | 1.56E-15  | 0.82 |
| 30092 | 204802  | 205049  | 2.03E-15  | 0.93 |
| 30092 | 234171  | 234557  | 1.99E-10  | 0.86 |
| 30093 | 5937    | 6247    | 3.03E-07  | 0.85 |
| 30093 | 15243   | 16444   | 3.27E-38  | 0.61 |
| 30093 | 19648   | 20307   | 5.22E-45  | 0.86 |
| 30093 | 27377   | 28526   | 9.94E-46  | 0.84 |
| 30093 | 28888   | 30058   | 1.95E-44  | 0.73 |
| 30093 | 34143   | 34503   | 1.31E-15  | 0.63 |
| 30093 | 37602   | 38070   | 2.45E-37  | 0.89 |

|       |        |        |           |      |
|-------|--------|--------|-----------|------|
| 30093 | 54807  | 55438  | 1.49E-22  | 0.92 |
| 30093 | 55669  | 56091  | 1.00E-50  | 0.93 |
| 30093 | 56333  | 57000  | 5.49E-26  | 0.88 |
| 30093 | 57330  | 57575  | 8.98E-21  | 0.89 |
| 30093 | 58634  | 59072  | 4.10E-21  | 0.85 |
| 30093 | 59413  | 59926  | 2.98E-25  | 0.92 |
| 30093 | 63011  | 63479  | 2.62E-23  | 0.85 |
| 30093 | 85418  | 86647  | 3.20E-49  | 0.8  |
| 30093 | 90321  | 90985  | 4.91E-15  | 0.68 |
| 30093 | 103174 | 104459 | 2.10E-141 | 0.89 |
| 30093 | 108778 | 109655 | 2.69E-80  | 0.94 |
| 30093 | 113117 | 113555 | 1.11E-43  | 0.9  |
| 30093 | 132139 | 132604 | 3.91E-15  | 0.76 |
| 30093 | 136190 | 137217 | 3.34E-35  | 0.83 |
| 30093 | 152357 | 153007 | 2.08E-61  | 0.9  |
| 30093 | 154949 | 155194 | 3.58E-19  | 0.95 |
| 30093 | 155685 | 156173 | 8.77E-28  | 0.82 |
| 30093 | 161542 | 162301 | 1.22E-44  | 0.64 |
| 30093 | 206932 | 207683 | 1.29E-26  | 0.82 |
| 30093 | 226644 | 226973 | 1.13E-46  | 0.93 |
| 30093 | 227542 | 227854 | 3.60E-39  | 0.92 |
| 30093 | 228703 | 229419 | 3.91E-62  | 0.93 |
| 30093 | 234976 | 235653 | 4.30E-28  | 0.9  |
| 30093 | 237046 | 238204 | 5.37E-32  | 0.79 |
| 30094 | 20418  | 21311  | 9.23E-45  | 0.93 |
| 30094 | 22704  | 23225  | 5.35E-17  | 0.77 |
| 30094 | 28208  | 28567  | 7.46E-28  | 0.91 |
| 30094 | 66370  | 66940  | 1.58E-34  | 0.9  |
| 30094 | 67887  | 68290  | 6.86E-55  | 0.93 |
| 30094 | 69994  | 70377  | 7.14E-35  | 0.89 |
| 30094 | 70606  | 71217  | 3.73E-27  | 0.93 |
| 30094 | 98317  | 98802  | 1.37E-77  | 0.94 |
| 30094 | 112006 | 112483 | 9.81E-60  | 0.85 |
| 30094 | 144234 | 145136 | 2.02E-33  | 0.63 |
| 30094 | 150951 | 151295 | 4.27E-34  | 0.89 |
| 30094 | 227472 | 227825 | 1.20E-77  | 0.91 |
| 30094 | 241095 | 241355 | 2.83E-25  | 0.91 |
| 30094 | 243077 | 243532 | 9.67E-32  | 0.96 |
| 30094 | 295554 | 296020 | 1.63E-20  | 0.82 |
| 30094 | 389848 | 390200 | 4.35E-23  | 0.94 |
| 30094 | 446864 | 447386 | 8.28E-04  | 1    |
| 30094 | 489183 | 489551 | 9.98E-06  | 0.91 |
| 30094 | 504842 | 505477 | 1.46E-30  | 0.94 |
| 30094 | 505976 | 506331 | 5.43E-28  | 0.94 |
| 30094 | 514446 | 515058 | 6.29E-78  | 0.95 |
| 30096 | 19041  | 19687  | 6.66E-08  | 0.89 |
| 30096 | 22599  | 22966  | 6.38E-04  | 0.77 |
| 30096 | 36172  | 36920  | 4.03E-32  | 0.74 |
| 30096 | 38326  | 38701  | 6.02E-09  | 0.85 |
| 30096 | 40683  | 40891  | 2.51E-04  | 0    |
| 30096 | 70741  | 71227  | 9.09E-18  | 0.82 |
| 30096 | 198303 | 198748 | 2.80E-31  | 0.89 |
| 30096 | 227924 | 228471 | 2.74E-04  | 0.95 |

|       |         |         |           |      |
|-------|---------|---------|-----------|------|
| 30098 | 69873   | 70819   | 9.90E-11  | 0.74 |
| 30098 | 71148   | 71670   | 2.95E-07  | 0.96 |
| 30098 | 92943   | 93739   | 2.65E-41  | 0.91 |
| 30098 | 93976   | 95427   | 6.02E-87  | 0.93 |
| 30098 | 107681  | 108596  | 3.06E-26  | 0.85 |
| 30098 | 109838  | 110685  | 2.22E-20  | 0.78 |
| 30098 | 112113  | 112376  | 3.32E-22  | 0.93 |
| 30098 | 113669  | 113987  | 1.62E-35  | 0.95 |
| 30098 | 117274  | 117818  | 2.90E-47  | 0.99 |
| 30098 | 122280  | 122669  | 2.53E-06  | 0.87 |
| 30098 | 157668  | 157934  | 1.03E-04  | 0.12 |
| 30098 | 174447  | 175357  | 2.05E-56  | 0.91 |
| 30098 | 175576  | 175999  | 1.92E-61  | 0.99 |
| 30098 | 190315  | 191338  | 3.69E-36  | 0.74 |
| 30098 | 241092  | 241600  | 8.52E-25  | 0.78 |
| 30098 | 286218  | 287555  | 1.83E-50  | 0.76 |
| 30098 | 292272  | 293304  | 2.40E-32  | 0.78 |
| 30098 | 294857  | 295601  | 9.12E-49  | 0.97 |
| 30098 | 327144  | 327572  | 1.66E-06  | 0.97 |
| 30098 | 360690  | 361107  | 1.38E-36  | 0.87 |
| 30098 | 401378  | 402121  | 4.12E-24  | 0.8  |
| 30098 | 434707  | 435188  | 6.94E-16  | 0.85 |
| 30098 | 435389  | 436423  | 1.80E-48  | 0.9  |
| 30098 | 447985  | 448288  | 3.46E-06  | 0.95 |
| 30098 | 452049  | 452431  | 6.09E-147 | 0.96 |
| 30098 | 496609  | 496982  | 1.01E-19  | 0.9  |
| 30098 | 507926  | 508540  | 2.77E-28  | 0.94 |
| 30098 | 522029  | 522360  | 3.88E-25  | 0.72 |
| 30098 | 522602  | 522907  | 4.25E-33  | 0.82 |
| 30098 | 576771  | 577191  | 4.85E-15  | 0.77 |
| 30098 | 597409  | 597771  | 3.31E-18  | 0.78 |
| 30098 | 671340  | 671543  | 1.45E-05  | 0.86 |
| 30098 | 674527  | 674921  | 1.01E-06  | 0.9  |
| 30098 | 687069  | 687557  | 1.12E-20  | 0.87 |
| 30098 | 721010  | 721467  | 2.78E-06  | 0.89 |
| 30098 | 747701  | 748062  | 1.05E-10  | 0.81 |
| 30098 | 882150  | 882734  | 3.71E-67  | 0.86 |
| 30098 | 888447  | 888851  | 4.48E-09  | 0.74 |
| 30098 | 889645  | 890006  | 1.46E-49  | 0.91 |
| 30098 | 892843  | 893302  | 3.32E-38  | 0.76 |
| 30098 | 893914  | 894398  | 3.28E-43  | 0.9  |
| 30098 | 900637  | 901278  | 2.20E-17  | 0.84 |
| 30098 | 902106  | 902430  | 1.61E-45  | 0.93 |
| 30098 | 943802  | 944994  | 8.34E-61  | 0.97 |
| 30098 | 1013811 | 1014034 | 1.27E-17  | 0.92 |
| 30098 | 1032106 | 1032435 | 2.14E-11  | 0.83 |
| 30098 | 1033291 | 1033546 | 4.73E-07  | 0.94 |
| 30098 | 1039239 | 1039723 | 1.86E-05  | 0.95 |
| 30098 | 1055444 | 1055966 | 2.71E-148 | 0.92 |
| 30098 | 1132822 | 1133675 | 5.23E-53  | 0.86 |
| 30098 | 1133940 | 1134641 | 3.29E-72  | 0.91 |
| 30098 | 1135272 | 1135574 | 9.52E-18  | 0.85 |
| 30098 | 1136142 | 1136637 | 1.30E-42  | 0.62 |

|       |         |         |           |      |
|-------|---------|---------|-----------|------|
| 30098 | 1153466 | 1153960 | 6.59E-40  | 0.84 |
| 30098 | 1254473 | 1254889 | 8.85E-06  | 0.86 |
| 30098 | 1409437 | 1409681 | 1.54E-08  | 0.92 |
| 30098 | 1414923 | 1415536 | 8.75E-31  | 0.65 |
| 30098 | 1416117 | 1417293 | 2.19E-55  | 0.69 |
| 30098 | 1466483 | 1466734 | 5.09E-07  | 0.88 |
| 30098 | 1492111 | 1492800 | 1.30E-67  | 0.91 |
| 30099 | 19504   | 20009   | 2.00E-15  | 0.81 |
| 30099 | 25122   | 25980   | 6.05E-39  | 0.7  |
| 30099 | 47620   | 48083   | 5.93E-22  | 0.71 |
| 30099 | 60977   | 61412   | 1.41E-08  | 0.71 |
| 30099 | 62138   | 62776   | 9.16E-26  | 0.81 |
| 30099 | 65363   | 65638   | 5.81E-31  | 0.85 |
| 30099 | 73444   | 75026   | 6.88E-288 | 0.89 |
| 30099 | 77949   | 78452   | 2.67E-24  | 0.64 |
| 30099 | 87123   | 87530   | 3.61E-38  | 0.85 |
| 30099 | 90865   | 91708   | 1.26E-89  | 0.94 |
| 30099 | 97362   | 97662   | 5.86E-14  | 0.88 |
| 30099 | 97876   | 98745   | 1.44E-40  | 0.73 |
| 30099 | 99241   | 99955   | 8.28E-53  | 0.85 |
| 30099 | 100627  | 101158  | 2.26E-18  | 0.77 |
| 30099 | 104474  | 105087  | 5.06E-27  | 0.8  |
| 30099 | 113271  | 113858  | 2.62E-55  | 0.83 |
| 30099 | 115019  | 115472  | 2.18E-65  | 0.92 |
| 30099 | 176499  | 176725  | 2.71E-26  | 0.96 |
| 30099 | 222156  | 222759  | 2.33E-08  | 0.67 |
| 30099 | 233649  | 234034  | 6.57E-12  | 0.72 |
| 30099 | 234289  | 234627  | 1.34E-25  | 0.89 |
| 30099 | 234935  | 235789  | 3.24E-105 | 0.95 |
| 30099 | 236388  | 237135  | 1.23E-31  | 0.75 |
| 30099 | 238694  | 240033  | 7.45E-69  | 0.61 |
| 30099 | 240348  | 240582  | 6.42E-34  | 0.69 |
| 30099 | 242662  | 243022  | 7.18E-28  | 0.83 |
| 30099 | 252285  | 252579  | 5.35E-28  | 0.91 |
| 30099 | 312877  | 313273  | 3.81E-32  | 0.9  |
| 30099 | 322743  | 323236  | 3.61E-07  | 0.63 |
| 30099 | 326141  | 326445  | 1.21E-13  | 0.73 |
| 30099 | 330230  | 331106  | 2.86E-24  | 0.79 |
| 30099 | 333629  | 333830  | 1.22E-18  | 0.92 |
| 30099 | 351009  | 351576  | 3.67E-69  | 0.89 |
| 30099 | 359170  | 360794  | 3.34E-132 | 0.67 |
| 30099 | 368062  | 368541  | 3.08E-13  | 0.68 |
| 30099 | 368777  | 369466  | 1.15E-18  | 0.61 |
| 30099 | 380893  | 382002  | 3.30E-98  | 0.84 |
| 30099 | 382408  | 383959  | 5.29E-199 | 0.91 |
| 30099 | 385438  | 385653  | 1.71E-09  | 0.82 |
| 30099 | 393299  | 393700  | 9.87E-11  | 0.9  |
| 30099 | 400991  | 401347  | 7.07E-64  | 0.92 |
| 30099 | 402574  | 402873  | 4.16E-11  | 0.9  |
| 30099 | 410824  | 411874  | 1.10E-121 | 0.89 |
| 30099 | 439124  | 439418  | 1.31E-18  | 0.88 |
| 30099 | 453840  | 454041  | 5.80E-07  | 0.84 |
| 30099 | 466095  | 466437  | 2.61E-11  | 0.94 |



|       |        |        |          |      |
|-------|--------|--------|----------|------|
| 30099 | 471933 | 472812 | 2.34E-17 | 0.95 |
| 30099 | 499041 | 499519 | 1.88E-37 | 0.74 |
| 30099 | 553268 | 553512 | 1.50E-12 | 0.82 |
| 30099 | 557869 | 558419 | 9.90E-22 | 0.78 |
| 30099 | 584974 | 585633 | 5.77E-10 | 0.64 |
| 30099 | 596039 | 596406 | 3.06E-39 | 0.88 |
| 30099 | 596658 | 596973 | 2.49E-18 | 0.77 |
| 30099 | 596725 | 597064 | 6.74E-17 | 0.82 |
| 30099 | 624919 | 626364 | 4.88E-98 | 0.76 |
| 30099 | 638807 | 639061 | 8.80E-15 | 0.87 |
| 30100 | 35592  | 35798  | 5.16E-35 | 0.89 |
| 30100 | 130620 | 130857 | 9.45E-04 | 0.94 |
| 30100 | 142082 | 142341 | 1.36E-20 | 0.8  |
| 30100 | 169812 | 170111 | 2.71E-14 | 0.92 |
| 30100 | 264030 | 264463 | 6.12E-36 | 0.96 |
| 30100 | 268903 | 269206 | 6.88E-13 | 0.73 |
| 30100 | 269339 | 269649 | 4.05E-11 | 0.77 |
| 30100 | 271094 | 271664 | 1.28E-38 | 0.9  |
| 30100 | 272037 | 272572 | 1.24E-15 | 0.72 |
| 30100 | 273076 | 273852 | 1.20E-39 | 0.95 |
| 30100 | 274062 | 274494 | 2.35E-14 | 0.71 |
| 30100 | 321670 | 321870 | 6.12E-05 | 1    |
| 30100 | 364801 | 366198 | 3.05E-44 | 0.61 |
| 30100 | 381255 | 381903 | 2.94E-51 | 0.97 |
| 30100 | 458758 | 459314 | 2.81E-38 | 0.84 |
| 30100 | 467954 | 468300 | 4.01E-29 | 0.85 |
| 30100 | 472446 | 472835 | 5.51E-50 | 0.76 |
| 30100 | 473529 | 474676 | 8.13E-79 | 0.93 |
| 30100 | 497920 | 498530 | 7.37E-24 | 0.91 |
| 30100 | 504628 | 505421 | 1.11E-06 | 0.94 |
| 30100 | 512119 | 512775 | 5.68E-14 | 0.84 |
| 30100 | 636224 | 636961 | 3.23E-29 | 0.69 |
| 30100 | 639905 | 640159 | 8.77E-15 | 0.79 |
| 30100 | 670507 | 670799 | 3.62E-16 | 0.89 |
| 30100 | 671530 | 672828 | 5.14E-66 | 0.9  |
| 30100 | 682064 | 682836 | 7.06E-50 | 0.96 |
| 30100 | 726090 | 726324 | 8.60E-07 | 0.91 |
| 30100 | 726281 | 726677 | 3.00E-07 | 0.91 |
| 30101 | 20921  | 21933  | 2.84E-63 | 0.83 |
| 30101 | 22266  | 23259  | 1.20E-84 | 0.94 |
| 30101 | 25856  | 26717  | 9.65E-33 | 0.83 |
| 30101 | 27928  | 28983  | 4.76E-49 | 0.83 |
| 30101 | 29473  | 30166  | 2.56E-46 | 0.91 |
| 30101 | 36906  | 37576  | 8.36E-34 | 0.81 |
| 30101 | 37853  | 38362  | 5.38E-20 | 0.81 |
| 30101 | 101686 | 102332 | 9.73E-45 | 0.87 |
| 30101 | 117753 | 118115 | 1.88E-25 | 0.81 |
| 30101 | 130114 | 130482 | 7.88E-23 | 0.9  |
| 30101 | 148676 | 148986 | 2.57E-19 | 0.81 |
| 30101 | 154326 | 154580 | 3.79E-26 | 0.92 |
| 30101 | 155262 | 155759 | 1.71E-17 | 0.79 |
| 30101 | 156025 | 156236 | 5.63E-24 | 0.64 |
| 30101 | 169521 | 170310 | 4.80E-41 | 0.73 |

|       |        |        |           |      |
|-------|--------|--------|-----------|------|
| 30101 | 170845 | 171203 | 7.29E-24  | 0.93 |
| 30102 | 71601  | 71900  | 1.69E-03  | 1    |
| 30102 | 75965  | 76387  | 2.07E-03  | 0.79 |
| 30102 | 101339 | 102146 | 1.02E-08  | 0.84 |
| 30104 | 6245   | 7072   | 2.96E-07  | 0.97 |
| 30104 | 42916  | 43200  | 1.59E-07  | 0.8  |
| 30104 | 58766  | 59154  | 2.26E-15  | 0.81 |
| 30104 | 65723  | 66035  | 7.40E-04  | 0.91 |
| 30104 | 72694  | 72965  | 2.49E-03  | 0.88 |
| 30104 | 107974 | 109190 | 8.84E-14  | 0.9  |
| 30104 | 119479 | 119752 | 9.45E-06  | 0.86 |
| 30104 | 157815 | 158367 | 1.47E-12  | 0.95 |
| 30104 | 196571 | 197002 | 3.98E-04  | 0.76 |
| 30104 | 211815 | 212244 | 2.15E-21  | 0.92 |
| 30104 | 241158 | 241395 | 2.07E-06  | 0.78 |
| 30104 | 241673 | 242809 | 1.34E-21  | 0.79 |
| 30105 | 4123   | 4484   | 4.46E-07  | 0.89 |
| 30105 | 85616  | 85818  | 3.65E-08  | 0.91 |
| 30105 | 108236 | 108686 | 7.11E-05  | 0.83 |
| 30105 | 116957 | 117421 | 1.82E-07  | 0.8  |
| 30105 | 281924 | 282145 | 9.04E-04  | 0.85 |
| 30105 | 317883 | 318125 | 2.41E-07  | 0.95 |
| 30105 | 333117 | 333413 | 8.15E-11  | 0.96 |
| 30105 | 340185 | 340480 | 6.27E-06  | 0.79 |
| 30106 | 24735  | 25444  | 3.39E-07  | 0.78 |
| 30106 | 49189  | 49552  | 5.28E-07  | 0.79 |
| 30106 | 55714  | 55978  | 3.52E-114 | 0.81 |
| 30106 | 232790 | 233595 | 1.24E-29  | 0.95 |
| 30106 | 273573 | 273903 | 5.80E-16  | 0.89 |
| 30106 | 296440 | 297902 | 3.24E-95  | 0.88 |
| 30106 | 298644 | 298914 | 2.92E-47  | 0.9  |
| 30106 | 300132 | 301306 | 1.04E-78  | 0.84 |
| 30106 | 301540 | 302498 | 1.73E-149 | 0.96 |
| 30106 | 303040 | 304481 | 3.15E-149 | 0.95 |
| 30106 | 311086 | 311333 | 9.38E-34  | 0.93 |
| 30106 | 321844 | 322310 | 1.32E-36  | 0.85 |
| 30106 | 322537 | 322742 | 6.25E-24  | 0.9  |
| 30106 | 366405 | 366622 | 1.86E-07  | 1    |
| 30106 | 370471 | 370917 | 1.59E-14  | 0.7  |
| 30106 | 407168 | 407911 | 4.09E-59  | 0.83 |
| 30106 | 408565 | 409350 | 1.90E-42  | 0.74 |
| 30106 | 410477 | 410917 | 2.96E-34  | 0.64 |
| 30106 | 417817 | 418095 | 4.71E-36  | 0.87 |
| 30106 | 418324 | 419520 | 1.28E-74  | 0.94 |
| 30106 | 464286 | 464694 | 8.33E-44  | 0.99 |
| 30106 | 465522 | 465932 | 7.46E-16  | 0.84 |
| 30106 | 466136 | 466639 | 3.97E-12  | 0.84 |
| 30106 | 469137 | 469674 | 1.19E-47  | 0.94 |
| 30106 | 469980 | 470542 | 7.32E-14  | 0.9  |
| 30106 | 528385 | 528814 | 1.82E-19  | 0.78 |
| 30106 | 532180 | 532730 | 6.49E-31  | 0.89 |
| 30106 | 535794 | 536172 | 4.76E-62  | 0.93 |
| 30106 | 539150 | 539492 | 6.54E-15  | 0.82 |

|       |        |        |           |      |
|-------|--------|--------|-----------|------|
| 30106 | 541333 | 542005 | 1.48E-17  | 0.88 |
| 30106 | 564266 | 564471 | 8.47E-06  | 0.89 |
| 30106 | 572189 | 573048 | 3.31E-64  | 0.92 |
| 30106 | 651292 | 652841 | 8.23E-85  | 0.82 |
| 30106 | 661031 | 661279 | 7.14E-16  | 0.97 |
| 30106 | 662204 | 662541 | 8.40E-19  | 0.95 |
| 30106 | 736528 | 736850 | 1.97E-30  | 0.8  |
| 30107 | 101409 | 101832 | 2.62E-04  | 0.78 |
| 30107 | 113349 | 113754 | 4.61E-23  | 0.88 |
| 30107 | 125837 | 126063 | 8.00E-06  | 0.88 |
| 30107 | 129084 | 129433 | 3.25E-12  | 1    |
| 30107 | 133787 | 134298 | 7.48E-05  | 0.89 |
| 30107 | 147055 | 147396 | 5.16E-04  | 0.78 |
| 30108 | 8702   | 8971   | 2.23E-10  | 0.87 |
| 30108 | 11630  | 11969  | 4.12E-20  | 0.97 |
| 30108 | 14983  | 15207  | 1.94E-14  | 0.82 |
| 30108 | 36073  | 36391  | 5.39E-10  | 0.83 |
| 30108 | 59438  | 59669  | 5.97E-18  | 0.83 |
| 30108 | 68176  | 68838  | 1.56E-33  | 0.97 |
| 30108 | 71175  | 71413  | 1.04E-24  | 0.81 |
| 30108 | 89046  | 90308  | 1.29E-58  | 0.77 |
| 30108 | 95756  | 96844  | 1.55E-98  | 0.93 |
| 30108 | 100678 | 101035 | 1.95E-15  | 0.8  |
| 30109 | 249    | 775    | 8.04E-14  | 0.65 |
| 30109 | 2364   | 3076   | 5.72E-13  | 0.84 |
| 30109 | 3350   | 3903   | 5.86E-29  | 0.75 |
| 30109 | 11763  | 12633  | 6.07E-19  | 0.7  |
| 30109 | 23843  | 24321  | 3.98E-05  | 0.8  |
| 30109 | 47946  | 48614  | 1.03E-182 | 0.93 |
| 30109 | 89469  | 89982  | 2.53E-16  | 0.85 |
| 30109 | 90189  | 90585  | 2.12E-25  | 0.65 |
| 30109 | 131947 | 132198 | 8.62E-21  | 0.97 |
| 30109 | 146709 | 147207 | 2.41E-16  | 0.84 |
| 30109 | 148173 | 148474 | 2.69E-25  | 0.8  |
| 30109 | 148833 | 149250 | 2.87E-78  | 0.86 |
| 30109 | 152056 | 153359 | 4.96E-127 | 0.91 |
| 30110 | 64046  | 64251  | 5.72E-07  | 0.88 |
| 30110 | 83982  | 84429  | 2.32E-08  | 0.95 |
| 30110 | 88724  | 89074  | 5.60E-06  | 0.97 |
| 30110 | 123774 | 124131 | 1.88E-35  | 0.98 |
| 30110 | 124685 | 125917 | 3.44E-123 | 0.91 |
| 30110 | 127411 | 128839 | 1.81E-119 | 0.9  |
| 30110 | 188382 | 189341 | 4.41E-87  | 0.97 |
| 30110 | 189582 | 190107 | 1.42E-35  | 0.94 |
| 30110 | 249429 | 249694 | 3.56E-07  | 0.9  |
| 30110 | 302029 | 302411 | 2.33E-05  | 0.82 |
| 30110 | 306074 | 306395 | 2.09E-06  | 0.86 |
| 30110 | 324922 | 325527 | 2.92E-45  | 0.86 |
| 30110 | 340936 | 341498 | 3.72E-18  | 0.8  |
| 30110 | 342988 | 343355 | 7.34E-33  | 0.86 |
| 30110 | 421064 | 421398 | 3.43E-14  | 0.83 |
| 30110 | 428653 | 428879 | 4.99E-11  | 0.81 |
| 30110 | 453701 | 454190 | 2.81E-26  | 0.85 |

|       |        |        |           |      |
|-------|--------|--------|-----------|------|
| 30110 | 477351 | 477797 | 5.19E-06  | 0.8  |
| 30110 | 537044 | 537285 | 7.91E-06  | 1    |
| 30110 | 541707 | 542134 | 6.05E-09  | 0.63 |
| 30110 | 542700 | 543177 | 9.77E-37  | 0.86 |
| 30110 | 573566 | 573858 | 1.27E-05  | 0.91 |
| 30110 | 626944 | 627477 | 2.53E-07  | 0.84 |
| 30110 | 710794 | 711137 | 7.21E-16  | 0.83 |
| 30110 | 713936 | 714496 | 1.98E-24  | 0.86 |
| 30110 | 718522 | 719210 | 9.92E-30  | 0.82 |
| 30110 | 719430 | 719854 | 2.80E-14  | 0.83 |
| 30110 | 720073 | 720402 | 6.26E-13  | 0.79 |
| 30110 | 776082 | 776516 | 4.05E-06  | 0.78 |
| 30110 | 777710 | 778636 | 2.98E-18  | 0.74 |
| 30111 | 10569  | 11632  | 1.09E-64  | 0.75 |
| 30111 | 11892  | 13491  | 2.74E-118 | 0.91 |
| 30111 | 18568  | 18817  | 2.14E-33  | 0.85 |
| 30111 | 49193  | 49818  | 1.55E-21  | 0.62 |
| 30111 | 60285  | 61991  | 7.79E-82  | 0.77 |
| 30111 | 72311  | 73163  | 8.18E-42  | 0.77 |
| 30111 | 73840  | 74273  | 9.43E-24  | 0.85 |
| 30111 | 74887  | 75532  | 4.62E-28  | 0.76 |
| 30111 | 84480  | 84971  | 3.06E-30  | 0.91 |
| 30111 | 96720  | 97635  | 8.90E-39  | 0.82 |
| 30111 | 116541 | 117326 | 4.03E-32  | 0.82 |
| 30111 | 122291 | 122702 | 4.96E-26  | 0.74 |
| 30111 | 131483 | 131722 | 5.45E-07  | 0.73 |
| 30111 | 145721 | 146259 | 3.31E-51  | 0.96 |
| 30111 | 159665 | 160267 | 6.77E-33  | 0.83 |
| 30111 | 160545 | 160957 | 7.87E-19  | 0.93 |
| 30111 | 195455 | 195930 | 8.06E-12  | 0.87 |
| 30111 | 213319 | 213762 | 1.95E-29  | 0.86 |
| 30111 | 223068 | 223512 | 3.28E-26  | 0.95 |
| 30111 | 224582 | 225057 | 1.99E-11  | 0.84 |
| 30111 | 242163 | 242774 | 1.69E-40  | 0.87 |
| 30111 | 248312 | 248889 | 2.03E-49  | 0.85 |
| 30111 | 252298 | 253046 | 2.66E-52  | 0.78 |
| 30111 | 259726 | 260625 | 9.48E-34  | 0.64 |
| 30111 | 266604 | 266995 | 1.12E-21  | 0.76 |
| 30111 | 271364 | 271664 | 5.33E-26  | 0.74 |
| 30111 | 271904 | 272721 | 1.34E-69  | 0.81 |
| 30111 | 273516 | 274653 | 8.11E-65  | 0.93 |
| 30111 | 285725 | 286937 | 2.16E-59  | 0.74 |
| 30111 | 287185 | 287588 | 1.53E-10  | 0.6  |
| 30111 | 304518 | 304820 | 3.01E-14  | 0.73 |
| 30111 | 310281 | 310751 | 2.73E-13  | 0.72 |
| 30111 | 353178 | 354446 | 1.39E-58  | 0.83 |
| 30112 | 892    | 1118   | 3.62E-04  | 0.81 |
| 30112 | 2734   | 3056   | 4.37E-05  | 0.83 |
| 30112 | 14215  | 14448  | 2.11E-04  | 0.86 |
| 30113 | 49045  | 49318  | 2.82E-06  | 0.88 |
| 30113 | 117188 | 117474 | 1.63E-22  | 0.79 |
| 30113 | 126468 | 127509 | 3.13E-59  | 0.95 |
| 30113 | 127844 | 129501 | 5.68E-193 | 0.95 |

|       |         |         |          |      |
|-------|---------|---------|----------|------|
| 30113 | 129773  | 130657  | 1.97E-83 | 0.98 |
| 30113 | 137584  | 138192  | 3.25E-44 | 0.93 |
| 30113 | 138510  | 138784  | 8.51E-23 | 0.96 |
| 30113 | 142114  | 142470  | 1.73E-34 | 1    |
| 30113 | 142875  | 143202  | 1.01E-46 | 0.91 |
| 30113 | 276521  | 276930  | 1.86E-06 | 0.82 |
| 30113 | 314914  | 315996  | 5.40E-23 | 0.72 |
| 30113 | 363919  | 364932  | 2.43E-89 | 0.94 |
| 30113 | 365290  | 365757  | 3.98E-21 | 0.93 |
| 30113 | 405595  | 406727  | 7.65E-37 | 0.67 |
| 30113 | 408085  | 408741  | 1.21E-79 | 0.92 |
| 30113 | 426246  | 426489  | 1.43E-18 | 0.96 |
| 30113 | 428468  | 428884  | 9.61E-17 | 0.96 |
| 30113 | 482316  | 483222  | 1.34E-14 | 0.88 |
| 30113 | 484083  | 484587  | 8.24E-05 | 0.94 |
| 30113 | 489003  | 490541  | 1.88E-53 | 0.74 |
| 30113 | 492856  | 493096  | 2.86E-17 | 0.89 |
| 30113 | 497319  | 498296  | 6.94E-68 | 0.91 |
| 30113 | 498562  | 498868  | 7.55E-21 | 0.9  |
| 30113 | 505583  | 505804  | 8.90E-25 | 0.94 |
| 30113 | 507715  | 508310  | 6.10E-41 | 0.94 |
| 30113 | 551092  | 552479  | 1.19E-85 | 0.68 |
| 30113 | 552743  | 553796  | 2.45E-42 | 0.84 |
| 30113 | 609421  | 609927  | 8.14E-08 | 0.89 |
| 30113 | 633734  | 634012  | 1.44E-16 | 0.9  |
| 30113 | 634250  | 634705  | 3.82E-21 | 0.97 |
| 30113 | 675596  | 675902  | 3.35E-14 | 0.74 |
| 30113 | 685492  | 685992  | 4.46E-42 | 0.95 |
| 30113 | 723761  | 724722  | 1.45E-54 | 0.91 |
| 30113 | 727258  | 727770  | 6.44E-30 | 0.93 |
| 30113 | 798762  | 799126  | 2.06E-05 | 0.78 |
| 30113 | 798779  | 799272  | 1.95E-08 | 0.84 |
| 30113 | 799219  | 799475  | 4.39E-04 | 0.79 |
| 30113 | 801237  | 802055  | 4.13E-24 | 0.77 |
| 30113 | 840899  | 841260  | 7.07E-26 | 0.83 |
| 30113 | 841985  | 842724  | 1.51E-41 | 0.91 |
| 30113 | 844138  | 844453  | 2.68E-24 | 0.76 |
| 30113 | 844673  | 845393  | 4.12E-43 | 0.93 |
| 30113 | 883014  | 883350  | 1.17E-16 | 0.92 |
| 30113 | 900515  | 900798  | 5.70E-07 | 0.9  |
| 30113 | 959590  | 959857  | 1.75E-21 | 0.82 |
| 30113 | 985303  | 985962  | 2.77E-22 | 0.94 |
| 30113 | 1078167 | 1078382 | 5.30E-25 | 0.96 |
| 30113 | 1078904 | 1079204 | 2.07E-66 | 0.96 |
| 30113 | 1080055 | 1080398 | 6.49E-44 | 0.96 |
| 30113 | 1082154 | 1082446 | 4.17E-08 | 0.93 |
| 30113 | 1100229 | 1100617 | 1.48E-03 | 0.88 |
| 30113 | 1103202 | 1103844 | 2.18E-17 | 0.79 |
| 30113 | 1174640 | 1175355 | 1.22E-10 | 0.85 |
| 30113 | 1207794 | 1208235 | 2.28E-23 | 0.91 |
| 30114 | 37177   | 38105   | 4.51E-66 | 0.92 |
| 30114 | 42409   | 42759   | 6.36E-07 | 0.81 |
| 30114 | 45323   | 45702   | 1.11E-31 | 0.73 |

|       |        |        |           |      |
|-------|--------|--------|-----------|------|
| 30114 | 62862  | 63255  | 2.66E-47  | 0.81 |
| 30114 | 64192  | 64516  | 2.18E-35  | 0.89 |
| 30114 | 64984  | 65393  | 9.21E-16  | 0.83 |
| 30114 | 67570  | 68112  | 8.67E-17  | 0.78 |
| 30114 | 68913  | 69215  | 1.23E-18  | 0.89 |
| 30114 | 69440  | 71097  | 1.38E-67  | 0.91 |
| 30114 | 84224  | 84448  | 9.71E-14  | 0.75 |
| 30114 | 95866  | 96155  | 8.22E-21  | 0.81 |
| 30114 | 122797 | 123777 | 5.27E-71  | 0.81 |
| 30114 | 140421 | 141766 | 4.42E-101 | 0.85 |
| 30114 | 158618 | 159029 | 3.19E-09  | 0.8  |
| 30114 | 169037 | 169291 | 1.66E-16  | 0.79 |
| 30114 | 173799 | 174292 | 5.86E-16  | 0.69 |
| 30114 | 186949 | 187331 | 4.05E-20  | 0.76 |
| 30114 | 193775 | 195010 | 1.97E-57  | 0.86 |
| 30114 | 196453 | 197035 | 2.40E-29  | 0.8  |
| 30114 | 203010 | 203248 | 2.19E-08  | 0.78 |
| 30114 | 213422 | 213733 | 3.85E-12  | 0.66 |
| 30114 | 214002 | 214418 | 7.18E-23  | 0.81 |
| 30114 | 239046 | 239288 | 9.39E-08  | 0.8  |
| 30114 | 247142 | 247631 | 6.58E-20  | 0.89 |
| 30114 | 248796 | 249197 | 6.73E-26  | 0.82 |
| 30114 | 251488 | 252056 | 5.58E-23  | 0.82 |
| 30114 | 263350 | 263966 | 1.32E-31  | 0.86 |
| 30115 | 13342  | 13957  | 4.23E-34  | 0.77 |
| 30115 | 24692  | 24963  | 1.63E-29  | 0.9  |
| 30115 | 26398  | 27353  | 1.98E-46  | 0.86 |
| 30115 | 46177  | 47000  | 1.41E-58  | 0.9  |
| 30115 | 118602 | 118916 | 5.33E-27  | 0.77 |
| 30115 | 119182 | 119613 | 7.82E-40  | 0.87 |
| 30115 | 119854 | 120565 | 2.83E-94  | 0.93 |
| 30115 | 137879 | 138135 | 1.39E-17  | 0.77 |
| 30115 | 143113 | 143401 | 6.74E-23  | 0.7  |
| 30115 | 146239 | 147656 | 1.72E-46  | 0.86 |
| 30115 | 162226 | 163069 | 4.49E-31  | 0.63 |
| 30115 | 180052 | 180666 | 1.22E-18  | 0.74 |
| 30115 | 219478 | 221328 | 3.98E-109 | 0.89 |
| 30115 | 243086 | 243463 | 4.38E-13  | 0.86 |
| 30115 | 248888 | 249091 | 2.39E-16  | 0.94 |
| 30115 | 252198 | 252430 | 3.35E-12  | 0.71 |
| 30115 | 267773 | 268625 | 7.46E-44  | 0.76 |
| 30115 | 268846 | 269510 | 1.36E-27  | 0.83 |
| 30115 | 286897 | 287253 | 1.01E-37  | 0.75 |
| 30115 | 365353 | 365932 | 1.47E-25  | 0.62 |
| 30115 | 376791 | 377394 | 6.13E-24  | 0.62 |
| 30115 | 393995 | 394288 | 9.89E-11  | 0.67 |
| 30115 | 412861 | 413079 | 4.72E-31  | 0.91 |
| 30115 | 426447 | 427286 | 9.27E-79  | 0.61 |
| 30115 | 480268 | 480635 | 1.26E-24  | 0.69 |
| 30115 | 487667 | 489094 | 1.96E-111 | 0.91 |
| 30115 | 529235 | 530619 | 6.90E-77  | 0.72 |
| 30115 | 537911 | 538459 | 2.96E-15  | 0.69 |
| 30115 | 546297 | 546660 | 9.70E-15  | 0.87 |

|       |        |        |           |      |
|-------|--------|--------|-----------|------|
| 30116 | 46990  | 47466  | 1.07E-21  | 0.81 |
| 30116 | 47724  | 48369  | 2.96E-39  | 0.88 |
| 30116 | 49736  | 50131  | 1.23E-36  | 0.92 |
| 30116 | 67587  | 68117  | 3.82E-26  | 0.87 |
| 30116 | 68986  | 69846  | 2.62E-60  | 0.92 |
| 30116 | 70178  | 70552  | 3.58E-10  | 0.8  |
| 30116 | 71515  | 71801  | 1.02E-34  | 0.92 |
| 30116 | 72885  | 73362  | 2.08E-35  | 0.95 |
| 30116 | 74723  | 75073  | 2.86E-24  | 0.85 |
| 30116 | 76592  | 76930  | 1.11E-26  | 0.83 |
| 30116 | 115118 | 117329 | 2.44E-100 | 0.87 |
| 30116 | 159803 | 160146 | 1.95E-39  | 0.95 |
| 30116 | 166561 | 166786 | 3.55E-09  | 0.82 |
| 30116 | 169482 | 170018 | 5.53E-33  | 0.79 |
| 30116 | 187154 | 187436 | 2.06E-28  | 0.65 |
| 30116 | 191393 | 191750 | 1.53E-23  | 0.8  |
| 30116 | 193257 | 193663 | 1.16E-32  | 0.86 |
| 30116 | 210634 | 211503 | 1.29E-59  | 0.8  |
| 30116 | 215382 | 215730 | 7.88E-38  | 0.83 |
| 30116 | 230888 | 231621 | 2.57E-43  | 0.93 |
| 30116 | 244246 | 245684 | 8.23E-60  | 0.72 |
| 30116 | 247780 | 248479 | 1.59E-40  | 0.92 |
| 30117 | 27519  | 28366  | 9.60E-28  | 0.88 |
| 30117 | 29656  | 30013  | 3.59E-14  | 0.97 |
| 30117 | 51112  | 51610  | 3.59E-37  | 0.94 |
| 30117 | 53563  | 53983  | 1.21E-20  | 0.92 |
| 30117 | 55130  | 55549  | 1.70E-12  | 0.87 |
| 30117 | 123845 | 124160 | 3.19E-12  | 0.98 |
| 30117 | 172561 | 173377 | 1.55E-44  | 0.95 |
| 30117 | 213958 | 214307 | 1.04E-04  | 0.96 |
| 30117 | 225231 | 225509 | 3.53E-92  | 0.87 |
| 30117 | 225842 | 226422 | 9.22E-45  | 0.93 |
| 30117 | 227458 | 228110 | 1.21E-62  | 0.94 |
| 30117 | 258094 | 258457 | 5.73E-08  | 0.95 |
| 30117 | 323683 | 324207 | 8.37E-31  | 0.93 |
| 30118 | 58028  | 58396  | 5.52E-46  | 0.98 |
| 30118 | 172487 | 172789 | 1.47E-15  | 0.88 |
| 30118 | 214602 | 215025 | 5.77E-07  | 0.93 |
| 30118 | 255486 | 255751 | 6.21E-15  | 0.82 |
| 30118 | 257663 | 258237 | 6.47E-08  | 0.75 |
| 30118 | 268682 | 269421 | 8.57E-14  | 0.76 |
| 30119 | 90535  | 91049  | 1.45E-21  | 0.8  |
| 30119 | 115530 | 115841 | 3.44E-38  | 0.95 |
| 30119 | 259165 | 259610 | 5.33E-23  | 0.94 |
| 30119 | 577537 | 577752 | 7.00E-12  | 0.94 |
| 30119 | 628637 | 629069 | 8.31E-14  | 0.79 |
| 30119 | 629466 | 629950 | 1.06E-13  | 0.89 |
| 30119 | 651129 | 651497 | 9.86E-12  | 0.98 |
| 30119 | 682952 | 683224 | 2.82E-13  | 0.91 |
| 30120 | 46155  | 47074  | 3.43E-43  | 0.88 |
| 30120 | 48061  | 48627  | 1.18E-20  | 0.72 |
| 30120 | 57533  | 58163  | 1.28E-62  | 0.79 |
| 30120 | 59302  | 59717  | 1.33E-30  | 0.82 |

|       |        |        |          |      |
|-------|--------|--------|----------|------|
| 30120 | 60717  | 61414  | 2.84E-54 | 0.91 |
| 30120 | 61618  | 62191  | 1.29E-32 | 0.79 |
| 30120 | 62399  | 63449  | 4.81E-90 | 0.7  |
| 30120 | 74530  | 74983  | 8.04E-28 | 0.78 |
| 30120 | 84012  | 84683  | 2.24E-44 | 0.82 |
| 30120 | 92856  | 94569  | 4.62E-94 | 0.87 |
| 30120 | 121665 | 122185 | 3.82E-06 | 0.96 |
| 30120 | 122172 | 123214 | 4.54E-71 | 0.77 |
| 30121 | 15974  | 16326  | 5.66E-06 | 0.88 |
| 30121 | 61654  | 61901  | 1.07E-04 | 0.91 |
| 30121 | 99947  | 100421 | 4.09E-05 | 1    |
| 30121 | 102210 | 102644 | 1.25E-06 | 0.86 |
| 30121 | 125429 | 125823 | 7.17E-12 | 0.66 |
| 30121 | 128504 | 128731 | 9.33E-06 | 0.77 |
| 30121 | 145782 | 145988 | 2.94E-05 | 1    |
| 30122 | 11149  | 11540  | 1.57E-36 | 0.98 |
| 30122 | 53507  | 54127  | 3.38E-11 | 0.95 |
| 30122 | 58329  | 58764  | 3.26E-09 | 1    |
| 30122 | 66162  | 66363  | 2.37E-15 | 0.69 |
| 30122 | 129770 | 130255 | 3.09E-16 | 0.65 |
| 30122 | 167977 | 168603 | 4.35E-65 | 0.95 |
| 30122 | 168952 | 169735 | 4.64E-37 | 0.89 |
| 30122 | 171403 | 171773 | 1.18E-13 | 0.9  |
| 30122 | 192532 | 193026 | 1.68E-43 | 0.96 |
| 30122 | 232090 | 232371 | 7.17E-19 | 0.89 |
| 30122 | 233856 | 234192 | 7.89E-21 | 0.94 |
| 30122 | 252264 | 252524 | 2.52E-66 | 0.93 |
| 30122 | 254648 | 255117 | 1.27E-28 | 0.96 |
| 30122 | 268723 | 269035 | 9.44E-17 | 0.91 |
| 30122 | 274842 | 275342 | 1.56E-15 | 0.74 |
| 30122 | 277143 | 277610 | 2.13E-20 | 0.79 |
| 30122 | 286634 | 287095 | 6.51E-84 | 0.95 |
| 30122 | 299844 | 300079 | 1.35E-25 | 0.85 |
| 30122 | 363722 | 364072 | 6.95E-12 | 0.81 |
| 30122 | 374378 | 375044 | 5.67E-52 | 0.9  |
| 30122 | 396927 | 397433 | 5.27E-34 | 0.77 |
| 30122 | 403495 | 403868 | 2.72E-59 | 0.93 |
| 30122 | 408366 | 408971 | 9.16E-69 | 0.94 |
| 30123 | 6172   | 6385   | 5.36E-07 | 0.84 |
| 30123 | 13595  | 13797  | 4.67E-05 | 0.86 |
| 30123 | 14443  | 14753  | 5.14E-14 | 0.82 |
| 30123 | 43549  | 43757  | 1.91E-07 | 0.84 |
| 30123 | 45942  | 46336  | 1.46E-09 | 0.91 |
| 30123 | 49360  | 49708  | 5.70E-07 | 0.85 |
| 30123 | 76106  | 76411  | 2.95E-11 | 0.87 |
| 30123 | 104703 | 105010 | 2.64E-14 | 0.76 |
| 30123 | 104817 | 105080 | 2.84E-17 | 0.79 |
| 30123 | 106657 | 107349 | 5.40E-16 | 0.87 |
| 30123 | 118331 | 118603 | 1.01E-08 | 0.82 |
| 30123 | 121929 | 122219 | 2.06E-12 | 0.75 |
| 30123 | 127734 | 128427 | 1.96E-42 | 0.79 |
| 30123 | 148156 | 148758 | 6.23E-09 | 0.94 |
| 30123 | 169306 | 169546 | 9.10E-07 | 0.8  |



|       |        |        |          |      |
|-------|--------|--------|----------|------|
| 30123 | 186665 | 187116 | 8.17E-08 | 0.8  |
| 30123 | 198790 | 199288 | 1.94E-08 | 0.79 |
| 30123 | 198829 | 199327 | 7.97E-09 | 0.81 |
| 30123 | 271198 | 271543 | 7.89E-09 | 0.98 |
| 30123 | 317031 | 317329 | 2.53E-06 | 1    |
| 30123 | 323272 | 324268 | 1.17E-13 | 0.92 |
| 30123 | 324467 | 324928 | 6.09E-05 | 0.93 |
| 30123 | 337228 | 337628 | 4.03E-07 | 1    |
| 30123 | 346919 | 347500 | 6.57E-05 | 0.91 |
| 30123 | 362924 | 363135 | 2.74E-03 | 0.81 |
| 30123 | 396952 | 397245 | 5.44E-12 | 0.82 |
| 30123 | 399249 | 399707 | 1.01E-08 | 0.89 |
| 30123 | 425442 | 425990 | 2.16E-23 | 0.79 |
| 30123 | 433343 | 433547 | 6.57E-04 | 0.83 |
| 30123 | 457735 | 458116 | 1.74E-11 | 0.77 |
| 30123 | 461173 | 461555 | 5.18E-07 | 0.71 |
| 30123 | 465098 | 465326 | 6.06E-09 | 0.86 |
| 30123 | 534891 | 535114 | 2.16E-04 | 0.94 |
| 30123 | 545944 | 546506 | 1.50E-05 | 0.84 |
| 30123 | 585149 | 585420 | 1.36E-06 | 0.86 |
| 30123 | 588130 | 588556 | 5.12E-10 | 0.88 |
| 30123 | 592892 | 593132 | 1.40E-07 | 0.84 |
| 30123 | 601043 | 601712 | 6.14E-07 | 0.86 |
| 30124 | 12608  | 12820  | 9.48E-10 | 0.81 |
| 30124 | 57457  | 57743  | 4.23E-10 | 0.97 |
| 30124 | 58955  | 59198  | 4.61E-13 | 0.97 |
| 30124 | 61268  | 61514  | 1.92E-05 | 0.87 |
| 30124 | 104211 | 104451 | 6.73E-10 | 0.76 |
| 30124 | 113075 | 113456 | 1.12E-07 | 0.81 |
| 30124 | 146904 | 147238 | 5.16E-17 | 0.83 |
| 30124 | 155365 | 155726 | 1.06E-14 | 0.83 |
| 30124 | 167439 | 167890 | 6.59E-09 | 0.8  |
| 30124 | 168548 | 168859 | 1.92E-10 | 0.86 |
| 30125 | 16143  | 16708  | 1.56E-21 | 0.94 |
| 30125 | 28773  | 29072  | 2.26E-16 | 0.98 |
| 30125 | 61085  | 61449  | 2.89E-09 | 0.88 |
| 30125 | 171934 | 172285 | 1.66E-36 | 0.86 |
| 30125 | 192326 | 193145 | 1.08E-08 | 0.92 |
| 30125 | 233679 | 234495 | 7.86E-54 | 0.94 |
| 30125 | 251358 | 252339 | 2.57E-19 | 0.75 |
| 30125 | 267207 | 267827 | 7.33E-32 | 0.93 |
| 30125 | 270074 | 270301 | 4.05E-30 | 0.93 |
| 30125 | 276044 | 276309 | 1.21E-17 | 0.94 |
| 30125 | 420922 | 421127 | 7.05E-10 | 0.8  |
| 30125 | 446222 | 446609 | 2.40E-34 | 0.93 |
| 30125 | 488515 | 488927 | 1.23E-06 | 0.97 |
| 30125 | 501464 | 501872 | 7.17E-80 | 0.96 |
| 30125 | 502351 | 502769 | 3.29E-23 | 0.95 |
| 30125 | 532704 | 533233 | 6.28E-36 | 0.87 |
| 30125 | 535103 | 535507 | 3.25E-37 | 0.92 |
| 30125 | 537329 | 537909 | 2.22E-35 | 0.94 |
| 30125 | 552883 | 553378 | 2.34E-35 | 0.9  |
| 30125 | 554821 | 556072 | 3.60E-71 | 0.95 |

|       |         |         |          |      |
|-------|---------|---------|----------|------|
| 30125 | 577479  | 577953  | 1.87E-06 | 0.9  |
| 30125 | 643934  | 644169  | 2.05E-30 | 0.94 |
| 30125 | 649535  | 649885  | 2.85E-16 | 0.82 |
| 30125 | 674590  | 675009  | 1.17E-10 | 0.78 |
| 30125 | 686684  | 686888  | 7.33E-04 | 0.84 |
| 30125 | 692026  | 692234  | 8.56E-11 | 0.88 |
| 30125 | 708123  | 708831  | 2.96E-16 | 0.94 |
| 30125 | 841250  | 841499  | 1.84E-04 | 0.94 |
| 30125 | 846171  | 846421  | 7.94E-07 | 0.91 |
| 30125 | 847305  | 847814  | 6.31E-18 | 0.85 |
| 30125 | 887905  | 888180  | 1.88E-05 | 1    |
| 30125 | 955923  | 956330  | 3.62E-27 | 0.9  |
| 30125 | 956980  | 957217  | 2.02E-13 | 0.75 |
| 30125 | 983399  | 983720  | 1.11E-03 | 1    |
| 30125 | 984051  | 984317  | 1.65E-03 | 1    |
| 30125 | 1004934 | 1005205 | 4.38E-18 | 0.98 |
| 30125 | 1127943 | 1128728 | 5.58E-49 | 0.92 |
| 30125 | 1134891 | 1135206 | 1.94E-39 | 0.82 |
| 30125 | 1176312 | 1177512 | 1.52E-73 | 0.9  |
| 30125 | 1183203 | 1183609 | 6.33E-16 | 0.85 |
| 30125 | 1184023 | 1184491 | 8.96E-29 | 0.97 |
| 30125 | 1187007 | 1187576 | 7.21E-24 | 0.82 |
| 30125 | 1292101 | 1292315 | 6.32E-11 | 0.98 |
| 30125 | 1314920 | 1315133 | 4.02E-09 | 0.87 |
| 30125 | 1315452 | 1315684 | 1.54E-04 | 0.89 |
| 30125 | 1317260 | 1317469 | 5.37E-04 | 0.8  |
| 30126 | 19695   | 19929   | 5.98E-12 | 0.97 |
| 30126 | 40860   | 41132   | 1.00E-05 | 0.92 |
| 30126 | 65680   | 65890   | 6.57E-11 | 0.95 |
| 30126 | 137950  | 138559  | 5.77E-08 | 0.91 |
| 30127 | 8727    | 9031    | 1.77E-03 | 0.76 |
| 30127 | 42194   | 42506   | 8.12E-05 | 0.87 |
| 30127 | 54916   | 55493   | 4.83E-05 | 0.94 |
| 30128 | 15933   | 16343   | 1.24E-15 | 0.81 |
| 30128 | 17252   | 17452   | 5.58E-05 | 0.78 |
| 30128 | 39071   | 39426   | 3.71E-10 | 1    |
| 30128 | 56959   | 57315   | 3.42E-32 | 0.97 |
| 30128 | 57846   | 58779   | 4.59E-29 | 0.85 |
| 30128 | 59149   | 59741   | 1.98E-36 | 0.83 |
| 30128 | 59982   | 60224   | 2.57E-21 | 0.89 |
| 30128 | 94582   | 95125   | 2.05E-41 | 0.67 |
| 30128 | 95396   | 96223   | 2.04E-44 | 0.9  |
| 30128 | 103029  | 103796  | 1.35E-36 | 0.85 |
| 30128 | 104158  | 104402  | 4.34E-40 | 0.92 |
| 30128 | 105778  | 106157  | 8.49E-35 | 0.94 |
| 30128 | 106524  | 106743  | 2.53E-40 | 0.88 |
| 30128 | 107036  | 107908  | 5.08E-48 | 0.65 |
| 30128 | 112118  | 112504  | 7.53E-13 | 0.89 |
| 30128 | 119049  | 119979  | 1.29E-36 | 0.8  |
| 30128 | 158929  | 159377  | 4.45E-12 | 0.74 |
| 30128 | 197973  | 199085  | 5.19E-47 | 0.78 |
| 30128 | 199637  | 200450  | 5.42E-32 | 0.9  |
| 30128 | 211785  | 212465  | 6.03E-58 | 0.9  |

|       |        |        |           |      |
|-------|--------|--------|-----------|------|
| 30128 | 216898 | 218048 | 2.15E-37  | 0.89 |
| 30128 | 221436 | 222704 | 4.05E-35  | 0.73 |
| 30128 | 226558 | 226883 | 8.44E-13  | 0.81 |
| 30128 | 237507 | 238241 | 6.84E-73  | 0.95 |
| 30128 | 238605 | 238958 | 4.05E-44  | 0.89 |
| 30128 | 239185 | 240292 | 2.08E-57  | 0.92 |
| 30128 | 240584 | 240873 | 8.17E-17  | 0.84 |
| 30128 | 242742 | 244741 | 8.50E-60  | 0.72 |
| 30128 | 250466 | 250776 | 7.82E-22  | 0.82 |
| 30128 | 286369 | 286924 | 4.64E-20  | 0.78 |
| 30128 | 290385 | 290770 | 1.24E-12  | 0.88 |
| 30128 | 291780 | 292020 | 5.07E-13  | 0.79 |
| 30128 | 294478 | 294929 | 1.15E-09  | 0.64 |
| 30128 | 295563 | 295964 | 4.64E-29  | 0.93 |
| 30128 | 296952 | 298106 | 5.11E-41  | 0.89 |
| 30128 | 298354 | 298968 | 1.27E-46  | 0.8  |
| 30128 | 299289 | 300437 | 4.56E-104 | 0.9  |
| 30128 | 300676 | 301597 | 7.05E-59  | 0.94 |
| 30128 | 308942 | 310055 | 9.21E-42  | 0.62 |
| 30128 | 320444 | 320737 | 1.06E-28  | 0.9  |
| 30128 | 331491 | 332521 | 4.06E-48  | 0.63 |
| 30128 | 337139 | 337733 | 2.89E-32  | 0.81 |
| 30128 | 356165 | 356884 | 1.18E-19  | 0.68 |
| 30128 | 361603 | 362489 | 1.61E-63  | 0.89 |
| 30128 | 374093 | 375379 | 1.48E-102 | 0.89 |
| 30128 | 398001 | 398240 | 8.36E-12  | 0.78 |
| 30128 | 398799 | 399057 | 4.65E-31  | 0.87 |
| 30128 | 404603 | 405308 | 1.37E-27  | 0.84 |
| 30128 | 405549 | 406211 | 1.91E-34  | 0.91 |
| 30128 | 406423 | 406805 | 1.03E-24  | 0.92 |
| 30128 | 410336 | 410847 | 1.95E-25  | 0.84 |
| 30128 | 415833 | 416206 | 1.98E-18  | 0.8  |
| 30128 | 418856 | 419137 | 6.46E-34  | 0.94 |
| 30128 | 419985 | 420447 | 1.00E-13  | 0.8  |
| 30128 | 426267 | 426600 | 3.17E-10  | 0.85 |
| 30128 | 448562 | 448983 | 4.39E-26  | 0.87 |
| 30128 | 471064 | 471631 | 3.89E-12  | 0.83 |
| 30128 | 507835 | 509294 | 1.87E-37  | 0.68 |
| 30128 | 513963 | 514959 | 7.05E-74  | 0.74 |
| 30128 | 515185 | 516869 | 5.01E-122 | 0.6  |
| 30128 | 541428 | 541750 | 1.08E-39  | 0.74 |
| 30128 | 545893 | 546508 | 1.08E-31  | 0.89 |
| 30128 | 546973 | 547229 | 1.91E-17  | 0.89 |
| 30128 | 565367 | 566019 | 1.72E-53  | 0.83 |
| 30128 | 589855 | 590834 | 6.77E-79  | 0.91 |
| 30128 | 594126 | 594343 | 4.76E-36  | 0.96 |
| 30128 | 625039 | 625757 | 3.03E-34  | 0.7  |
| 30128 | 639774 | 640053 | 4.23E-14  | 0.82 |
| 30128 | 672123 | 672683 | 8.57E-31  | 0.69 |
| 30128 | 686520 | 687270 | 3.44E-37  | 0.8  |
| 30128 | 687501 | 687834 | 2.83E-05  | 0.79 |
| 30128 | 689611 | 690015 | 5.45E-16  | 0.78 |
| 30128 | 690948 | 691708 | 1.18E-32  | 0.77 |

|       |         |         |           |      |
|-------|---------|---------|-----------|------|
| 30128 | 700764  | 701380  | 2.89E-24  | 0.7  |
| 30128 | 705168  | 706569  | 1.91E-91  | 0.69 |
| 30128 | 720733  | 721091  | 1.51E-07  | 0.7  |
| 30128 | 741673  | 741900  | 1.53E-08  | 0.75 |
| 30128 | 756658  | 756881  | 2.68E-12  | 0.85 |
| 30128 | 758876  | 759967  | 4.41E-48  | 0.8  |
| 30128 | 807484  | 807719  | 1.66E-27  | 0.91 |
| 30128 | 829178  | 829709  | 3.16E-23  | 0.87 |
| 30128 | 832804  | 833218  | 8.91E-24  | 0.73 |
| 30128 | 833619  | 834233  | 2.43E-26  | 0.71 |
| 30128 | 836412  | 837292  | 3.22E-29  | 0.61 |
| 30128 | 838106  | 838896  | 1.22E-68  | 0.76 |
| 30128 | 845191  | 846161  | 1.00E-53  | 0.74 |
| 30128 | 900019  | 900427  | 7.61E-15  | 0.75 |
| 30128 | 913753  | 914242  | 2.27E-18  | 0.81 |
| 30128 | 938331  | 940245  | 4.25E-71  | 0.77 |
| 30128 | 954384  | 954825  | 3.04E-18  | 0.77 |
| 30128 | 955089  | 956611  | 4.42E-98  | 0.8  |
| 30128 | 957271  | 957674  | 4.00E-27  | 0.64 |
| 30128 | 969796  | 970760  | 1.37E-120 | 0.88 |
| 30128 | 974066  | 975165  | 4.40E-32  | 0.71 |
| 30128 | 977864  | 978666  | 1.69E-38  | 0.79 |
| 30128 | 978892  | 979378  | 7.34E-38  | 0.83 |
| 30128 | 981368  | 981718  | 5.47E-20  | 0.86 |
| 30128 | 1010293 | 1010576 | 2.96E-22  | 0.88 |
| 30128 | 1029989 | 1030520 | 6.97E-20  | 0.82 |
| 30128 | 1059990 | 1060278 | 1.22E-13  | 0.88 |
| 30128 | 1079287 | 1079731 | 8.28E-81  | 0.95 |
| 30128 | 1082950 | 1083747 | 4.50E-64  | 0.82 |
| 30128 | 1102349 | 1103100 | 7.16E-21  | 0.8  |
| 30128 | 1103953 | 1104298 | 1.66E-23  | 0.81 |
| 30128 | 1105960 | 1106525 | 1.05E-38  | 0.91 |
| 30128 | 1130041 | 1130369 | 2.10E-23  | 0.83 |
| 30128 | 1131314 | 1133440 | 6.43E-174 | 0.91 |
| 30128 | 1134855 | 1135128 | 1.32E-22  | 0.9  |
| 30128 | 1139856 | 1140162 | 7.73E-17  | 0.83 |
| 30128 | 1143768 | 1144752 | 2.20E-47  | 0.92 |
| 30128 | 1148514 | 1149234 | 4.38E-26  | 0.81 |
| 30128 | 1223345 | 1223968 | 1.02E-40  | 0.87 |
| 30128 | 1230522 | 1231362 | 1.51E-56  | 0.79 |
| 30128 | 1247016 | 1247279 | 8.64E-21  | 0.73 |
| 30128 | 1261859 | 1262276 | 6.82E-26  | 0.8  |
| 30128 | 1270216 | 1270617 | 9.03E-23  | 0.63 |
| 30128 | 1283884 | 1284616 | 4.62E-27  | 0.78 |
| 30128 | 1285465 | 1285757 | 4.25E-14  | 0.81 |
| 30128 | 1286721 | 1286950 | 3.46E-12  | 0.76 |
| 30128 | 1287183 | 1287487 | 4.06E-11  | 0.79 |
| 30128 | 1287418 | 1287974 | 4.17E-21  | 0.81 |
| 30128 | 1290423 | 1290705 | 1.21E-21  | 0.74 |
| 30128 | 1291007 | 1291424 | 1.09E-46  | 0.88 |
| 30128 | 1292112 | 1292526 | 8.75E-52  | 0.9  |
| 30128 | 1316239 | 1316561 | 1.73E-23  | 0.83 |
| 30128 | 1333481 | 1334085 | 2.72E-51  | 0.84 |

|       |         |         |           |      |
|-------|---------|---------|-----------|------|
| 30128 | 1356670 | 1356870 | 5.64E-13  | 0.81 |
| 30128 | 1406822 | 1407431 | 3.77E-10  | 0.8  |
| 30128 | 1436433 | 1437245 | 6.84E-97  | 0.84 |
| 30128 | 1437781 | 1438135 | 4.94E-60  | 0.87 |
| 30128 | 1438378 | 1438802 | 1.92E-69  | 0.89 |
| 30128 | 1439534 | 1440355 | 9.93E-105 | 0.89 |
| 30128 | 1458184 | 1458690 | 7.12E-28  | 0.94 |
| 30128 | 1458917 | 1459729 | 2.30E-38  | 0.84 |
| 30128 | 1487224 | 1487916 | 1.42E-57  | 0.87 |
| 30128 | 1516161 | 1516619 | 2.02E-36  | 0.93 |
| 30128 | 1517130 | 1518984 | 6.44E-124 | 0.86 |
| 30128 | 1534283 | 1534688 | 5.05E-10  | 0.63 |
| 30128 | 1546269 | 1547113 | 1.23E-24  | 0.84 |
| 30128 | 1551080 | 1551442 | 4.14E-21  | 0.82 |
| 30128 | 1568887 | 1569115 | 9.50E-35  | 0.95 |
| 30128 | 1572962 | 1574432 | 2.89E-52  | 0.81 |
| 30128 | 1581035 | 1581447 | 6.70E-30  | 0.68 |
| 30128 | 1583746 | 1584614 | 8.01E-22  | 0.64 |
| 30128 | 1600746 | 1600962 | 5.87E-25  | 0.78 |
| 30128 | 1611470 | 1611757 | 1.65E-13  | 0.77 |
| 30128 | 1612190 | 1612642 | 2.31E-42  | 0.74 |
| 30128 | 1622010 | 1622640 | 6.15E-120 | 0.86 |
| 30128 | 1627277 | 1628200 | 3.08E-28  | 0.82 |
| 30128 | 1630855 | 1631550 | 3.94E-43  | 0.86 |
| 30128 | 1633311 | 1634611 | 5.74E-145 | 0.89 |
| 30128 | 1663336 | 1663610 | 2.82E-18  | 0.68 |
| 30128 | 1670214 | 1670790 | 1.71E-22  | 0.77 |
| 30128 | 1679234 | 1679590 | 1.64E-35  | 0.92 |
| 30128 | 1679819 | 1680369 | 4.97E-24  | 0.9  |
| 30128 | 1684175 | 1686210 | 6.49E-130 | 0.8  |
| 30128 | 1695408 | 1696056 | 8.97E-25  | 0.78 |
| 30128 | 1696362 | 1696764 | 5.51E-24  | 0.84 |
| 30128 | 1716513 | 1717498 | 2.99E-90  | 0.77 |
| 30128 | 1718886 | 1719410 | 2.36E-70  | 0.75 |
| 30128 | 1720829 | 1722218 | 9.56E-138 | 0.93 |
| 30128 | 1722523 | 1723939 | 1.96E-138 | 0.93 |
| 30128 | 1724257 | 1724672 | 8.98E-68  | 0.99 |
| 30128 | 1725178 | 1725445 | 3.43E-30  | 0.8  |
| 30128 | 1745539 | 1745854 | 7.53E-24  | 0.94 |
| 30128 | 1757115 | 1758136 | 2.74E-61  | 0.9  |
| 30128 | 1768191 | 1768590 | 6.21E-22  | 0.93 |
| 30128 | 1776218 | 1777627 | 1.46E-84  | 0.63 |
| 30128 | 1782824 | 1783406 | 1.33E-29  | 0.75 |
| 30128 | 1787526 | 1787734 | 3.51E-22  | 0.89 |
| 30128 | 1793451 | 1793917 | 2.04E-39  | 0.77 |
| 30128 | 1796615 | 1798134 | 6.23E-46  | 0.6  |
| 30128 | 1859763 | 1860081 | 1.18E-17  | 0.81 |
| 30128 | 1884517 | 1885250 | 1.14E-40  | 0.91 |
| 30128 | 1885469 | 1885815 | 6.64E-13  | 0.71 |
| 30128 | 1907178 | 1909194 | 1.63E-138 | 0.85 |
| 30128 | 1917896 | 1918435 | 4.86E-69  | 0.92 |
| 30128 | 1942669 | 1943067 | 1.73E-27  | 0.78 |
| 30128 | 1943365 | 1943916 | 2.78E-20  | 0.74 |

|       |         |         |           |      |
|-------|---------|---------|-----------|------|
| 30128 | 1952829 | 1953265 | 6.03E-17  | 0.7  |
| 30128 | 1966606 | 1967398 | 1.01E-62  | 0.84 |
| 30128 | 1967600 | 1969264 | 1.08E-71  | 0.77 |
| 30128 | 1984372 | 1985585 | 2.14E-54  | 0.87 |
| 30128 | 1985786 | 1986387 | 9.94E-25  | 0.86 |
| 30128 | 2003988 | 2004737 | 6.32E-115 | 0.91 |
| 30128 | 2004972 | 2005207 | 9.23E-87  | 0.92 |
| 30128 | 2025352 | 2025712 | 5.15E-20  | 0.62 |
| 30128 | 2043581 | 2044782 | 3.90E-66  | 0.8  |
| 30128 | 2045000 | 2046060 | 2.68E-51  | 0.81 |
| 30128 | 2062128 | 2062666 | 3.83E-18  | 0.63 |
| 30128 | 2065302 | 2067248 | 5.20E-110 | 0.88 |
| 30128 | 2076733 | 2078278 | 1.33E-77  | 0.76 |
| 30128 | 2079699 | 2080038 | 1.01E-54  | 0.66 |
| 30128 | 2080799 | 2081806 | 5.64E-52  | 0.87 |
| 30128 | 2082010 | 2083825 | 1.62E-101 | 0.87 |
| 30128 | 2112060 | 2112797 | 4.76E-26  | 0.77 |
| 30128 | 2161309 | 2161528 | 1.05E-27  | 0.84 |
| 30128 | 2161961 | 2162297 | 4.67E-23  | 0.78 |
| 30128 | 2173524 | 2173785 | 1.03E-13  | 0.62 |
| 30128 | 2188526 | 2188808 | 2.62E-13  | 0.61 |
| 30128 | 2189013 | 2190016 | 1.07E-72  | 0.87 |
| 30128 | 2194812 | 2196285 | 3.50E-89  | 0.83 |
| 30128 | 2223649 | 2224155 | 2.17E-37  | 0.89 |
| 30128 | 2240309 | 2240705 | 1.35E-23  | 0.82 |
| 30128 | 2246800 | 2247102 | 3.51E-03  | 0.75 |
| 30128 | 2308159 | 2308495 | 1.53E-11  | 0.86 |
| 30128 | 2320023 | 2320233 | 4.62E-16  | 0.77 |
| 30128 | 2354338 | 2354769 | 1.39E-14  | 0.66 |
| 30128 | 2356390 | 2356603 | 1.31E-17  | 0.83 |
| 30128 | 2382491 | 2383041 | 7.80E-32  | 0.88 |
| 30128 | 2405495 | 2406016 | 1.15E-10  | 0.79 |
| 30128 | 2427940 | 2429555 | 1.05E-72  | 0.63 |
| 30128 | 2430263 | 2431551 | 2.96E-59  | 0.63 |
| 30128 | 2446582 | 2447010 | 2.58E-28  | 0.89 |
| 30128 | 2447222 | 2448378 | 5.48E-87  | 0.91 |
| 30128 | 2451120 | 2451480 | 9.04E-31  | 0.9  |
| 30128 | 2452022 | 2452234 | 4.85E-25  | 0.86 |
| 30128 | 2469639 | 2470799 | 6.07E-57  | 0.84 |
| 30128 | 2479620 | 2480622 | 3.72E-56  | 0.72 |
| 30128 | 2481738 | 2482070 | 1.27E-34  | 0.9  |
| 30128 | 2498650 | 2500343 | 4.26E-77  | 0.65 |
| 30128 | 2500565 | 2502847 | 9.38E-277 | 0.82 |
| 30128 | 2504268 | 2504563 | 1.01E-14  | 0.76 |
| 30128 | 2512773 | 2513374 | 8.95E-27  | 0.74 |
| 30128 | 2576803 | 2577049 | 1.14E-28  | 0.77 |
| 30128 | 2588571 | 2589073 | 9.57E-24  | 0.79 |
| 30128 | 2614587 | 2615037 | 3.81E-24  | 0.8  |
| 30128 | 2656222 | 2657014 | 8.91E-23  | 0.71 |
| 30128 | 2674393 | 2674939 | 4.47E-22  | 0.87 |
| 30128 | 2676713 | 2678189 | 1.06E-52  | 0.82 |
| 30128 | 2688509 | 2689070 | 1.46E-20  | 0.92 |
| 30128 | 2704715 | 2706374 | 4.74E-68  | 0.6  |

|       |        |        |          |      |
|-------|--------|--------|----------|------|
| 30129 | 11546  | 12029  | 4.17E-10 | 0.79 |
| 30129 | 29185  | 29537  | 6.86E-27 | 0.96 |
| 30129 | 57169  | 57749  | 6.84E-27 | 0.79 |
| 30129 | 58317  | 58726  | 9.06E-12 | 0.79 |
| 30129 | 75425  | 76092  | 6.11E-25 | 0.7  |
| 30129 | 100474 | 102320 | 1.25E-64 | 0.82 |
| 30129 | 109968 | 110509 | 3.21E-57 | 0.95 |
| 30129 | 112152 | 112427 | 6.23E-20 | 0.84 |
| 30129 | 127835 | 128705 | 9.98E-55 | 0.72 |
| 30130 | 25784  | 26064  | 5.13E-15 | 0.82 |
| 30130 | 34197  | 34679  | 1.40E-31 | 0.82 |
| 30130 | 85556  | 85964  | 1.94E-18 | 0.74 |
| 30130 | 87122  | 87355  | 2.93E-75 | 0.63 |
| 30130 | 99999  | 100991 | 1.75E-34 | 0.84 |
| 30130 | 102045 | 102613 | 1.35E-30 | 0.69 |
| 30130 | 122339 | 123104 | 5.86E-31 | 0.84 |
| 30130 | 127147 | 128211 | 1.41E-57 | 0.6  |
| 30131 | 20169  | 20608  | 1.06E-23 | 0.68 |
| 30131 | 31669  | 32905  | 3.88E-28 | 0.82 |
| 30131 | 33777  | 34085  | 1.71E-33 | 0.91 |
| 30131 | 34318  | 35378  | 4.57E-53 | 0.86 |
| 30131 | 35678  | 37045  | 3.32E-56 | 0.86 |
| 30131 | 37999  | 39080  | 5.03E-51 | 0.91 |
| 30131 | 61729  | 62266  | 1.80E-12 | 0.68 |
| 30131 | 62754  | 63284  | 6.56E-25 | 0.97 |
| 30131 | 63914  | 64740  | 1.66E-31 | 0.9  |
| 30131 | 134830 | 135340 | 6.19E-28 | 0.88 |
| 30131 | 135586 | 135932 | 2.45E-35 | 0.79 |
| 30131 | 191194 | 191421 | 3.30E-10 | 0.67 |
| 30131 | 196113 | 197001 | 1.05E-36 | 0.87 |
| 30131 | 223797 | 224153 | 9.89E-08 | 0.66 |
| 30131 | 249074 | 249843 | 5.31E-25 | 0.72 |
| 30131 | 292547 | 292946 | 4.12E-12 | 0.75 |
| 30131 | 297349 | 297920 | 1.45E-30 | 0.8  |
| 30131 | 322163 | 323218 | 3.80E-57 | 0.81 |
| 30131 | 325048 | 325761 | 3.88E-46 | 0.76 |
| 30131 | 328022 | 328850 | 9.97E-30 | 0.75 |
| 30131 | 329831 | 330802 | 2.04E-63 | 0.91 |
| 30131 | 338797 | 339629 | 1.48E-68 | 0.89 |
| 30131 | 339925 | 340657 | 6.70E-38 | 0.85 |
| 30131 | 345385 | 345886 | 4.98E-20 | 0.82 |
| 30131 | 346447 | 347562 | 1.13E-47 | 0.92 |
| 30131 | 349098 | 349933 | 3.49E-37 | 0.89 |
| 30131 | 350879 | 351771 | 2.92E-25 | 0.89 |
| 30131 | 353928 | 355879 | 1.27E-82 | 0.77 |
| 30131 | 356814 | 357977 | 1.95E-46 | 0.72 |
| 30131 | 367462 | 368891 | 1.98E-79 | 0.89 |
| 30131 | 375045 | 375386 | 1.38E-23 | 0.84 |
| 30131 | 375642 | 376398 | 4.19E-39 | 0.85 |
| 30131 | 377151 | 377534 | 5.06E-19 | 0.9  |
| 30131 | 384377 | 384609 | 6.54E-12 | 0.6  |
| 30131 | 390405 | 391654 | 2.18E-44 | 0.9  |
| 30131 | 393156 | 393454 | 9.68E-34 | 0.91 |

|       |        |        |           |      |
|-------|--------|--------|-----------|------|
| 30131 | 427591 | 427994 | 2.46E-13  | 0.7  |
| 30131 | 428208 | 429074 | 4.13E-43  | 0.85 |
| 30131 | 434850 | 435329 | 2.30E-44  | 0.87 |
| 30131 | 436148 | 436422 | 9.03E-12  | 0.81 |
| 30131 | 439743 | 441644 | 4.31E-89  | 0.82 |
| 30131 | 446963 | 447642 | 6.19E-32  | 0.8  |
| 30131 | 447082 | 447832 | 5.20E-39  | 0.81 |
| 30131 | 453183 | 453542 | 1.51E-12  | 0.82 |
| 30131 | 458146 | 458596 | 3.51E-30  | 0.8  |
| 30131 | 463819 | 464050 | 8.33E-18  | 0.86 |
| 30131 | 496551 | 496856 | 4.99E-30  | 0.97 |
| 30131 | 528434 | 528964 | 4.14E-29  | 0.83 |
| 30131 | 545947 | 546816 | 9.82E-81  | 0.95 |
| 30131 | 549407 | 549747 | 1.37E-56  | 0.73 |
| 30131 | 551290 | 551508 | 8.01E-44  | 0.83 |
| 30131 | 551776 | 552137 | 1.86E-28  | 0.87 |
| 30131 | 552896 | 553603 | 1.11E-25  | 0.84 |
| 30131 | 553928 | 554267 | 2.48E-19  | 0.88 |
| 30131 | 554473 | 555785 | 1.63E-68  | 0.92 |
| 30131 | 559792 | 560013 | 4.59E-30  | 0.9  |
| 30131 | 568071 | 569279 | 8.20E-80  | 0.76 |
| 30131 | 570191 | 570746 | 1.00E-30  | 0.85 |
| 30131 | 570966 | 571591 | 1.83E-20  | 0.86 |
| 30131 | 571851 | 572265 | 3.18E-26  | 0.84 |
| 30131 | 605300 | 605936 | 3.89E-32  | 0.81 |
| 30131 | 614472 | 614713 | 9.14E-07  | 0.76 |
| 30131 | 663998 | 664827 | 6.69E-56  | 0.77 |
| 30131 | 699225 | 700232 | 4.35E-59  | 0.93 |
| 30131 | 703429 | 705619 | 7.89E-137 | 0.86 |
| 30131 | 706488 | 707332 | 7.35E-32  | 0.83 |
| 30131 | 708818 | 709346 | 3.42E-25  | 0.94 |
| 30131 | 712750 | 713210 | 1.17E-12  | 0.64 |
| 30131 | 718929 | 720532 | 7.10E-61  | 0.74 |
| 30131 | 741221 | 742014 | 4.77E-78  | 0.95 |
| 30131 | 769255 | 770403 | 1.33E-41  | 0.92 |
| 30131 | 770942 | 771232 | 7.77E-13  | 0.91 |
| 30131 | 773849 | 774372 | 2.00E-17  | 0.84 |
| 30131 | 780230 | 780522 | 3.11E-44  | 0.92 |
| 30131 | 782376 | 782625 | 5.54E-20  | 0.95 |
| 30131 | 785515 | 786318 | 8.92E-32  | 0.85 |
| 30131 | 800312 | 801471 | 2.80E-64  | 0.86 |
| 30131 | 811403 | 811793 | 2.89E-29  | 0.89 |
| 30131 | 844659 | 845077 | 3.54E-46  | 0.87 |
| 30131 | 850521 | 851497 | 3.01E-45  | 0.65 |
| 30131 | 855272 | 855662 | 2.78E-37  | 0.73 |
| 30131 | 870385 | 871283 | 7.85E-118 | 0.86 |
| 30131 | 874032 | 876092 | 9.05E-246 | 0.79 |
| 30131 | 883837 | 884138 | 2.86E-19  | 0.88 |
| 30131 | 892521 | 893305 | 8.09E-34  | 0.89 |
| 30131 | 897761 | 898198 | 8.41E-06  | 0.72 |
| 30131 | 977572 | 978701 | 2.51E-32  | 0.83 |
| 30131 | 978939 | 979413 | 2.39E-13  | 0.83 |
| 30131 | 979622 | 980827 | 3.28E-65  | 0.73 |



|       |         |         |           |      |
|-------|---------|---------|-----------|------|
| 30131 | 992988  | 994001  | 9.06E-32  | 0.83 |
| 30131 | 994259  | 994845  | 1.30E-17  | 0.81 |
| 30131 | 995444  | 996609  | 5.77E-150 | 0.91 |
| 30131 | 997245  | 998095  | 3.12E-84  | 0.93 |
| 30131 | 1013810 | 1014272 | 1.42E-41  | 0.86 |
| 30131 | 1048856 | 1049575 | 3.41E-57  | 0.89 |
| 30131 | 1050134 | 1050394 | 3.59E-38  | 0.95 |
| 30131 | 1050943 | 1051358 | 1.12E-33  | 0.87 |
| 30131 | 1067792 | 1069360 | 7.59E-177 | 0.86 |
| 30131 | 1069631 | 1070178 | 1.28E-95  | 0.9  |
| 30131 | 1070435 | 1070982 | 4.44E-73  | 0.96 |
| 30131 | 1071347 | 1071619 | 5.98E-21  | 0.91 |
| 30131 | 1073378 | 1074118 | 1.55E-56  | 0.84 |
| 30131 | 1113894 | 1114434 | 1.77E-37  | 0.94 |
| 30131 | 1115882 | 1116978 | 2.30E-28  | 0.78 |
| 30131 | 1125050 | 1126156 | 3.00E-80  | 0.64 |
| 30131 | 1145174 | 1145495 | 1.87E-12  | 0.78 |
| 30131 | 1145428 | 1145723 | 1.16E-19  | 0.82 |
| 30131 | 1152075 | 1152699 | 1.84E-44  | 0.91 |
| 30131 | 1158381 | 1159230 | 7.21E-28  | 0.83 |
| 30131 | 1177671 | 1178042 | 8.79E-15  | 0.65 |
| 30131 | 1212600 | 1213318 | 2.72E-59  | 0.74 |
| 30131 | 1218876 | 1219333 | 2.22E-34  | 0.92 |
| 30131 | 1222120 | 1222360 | 1.23E-22  | 0.78 |
| 30131 | 1224256 | 1225663 | 3.55E-91  | 0.84 |
| 30131 | 1225976 | 1226688 | 5.63E-26  | 0.75 |
| 30131 | 1237345 | 1238229 | 4.03E-23  | 0.67 |
| 30131 | 1241486 | 1242245 | 2.28E-35  | 0.78 |
| 30131 | 1246267 | 1246895 | 6.90E-36  | 0.81 |
| 30131 | 1247525 | 1248228 | 6.97E-30  | 0.79 |
| 30131 | 1260366 | 1260740 | 8.35E-23  | 0.92 |
| 30131 | 1265569 | 1266393 | 2.45E-23  | 0.69 |
| 30131 | 1275577 | 1275828 | 7.36E-09  | 0.76 |
| 30131 | 1292166 | 1292527 | 3.83E-17  | 0.84 |
| 30131 | 1309335 | 1309641 | 3.42E-15  | 0.85 |
| 30131 | 1309781 | 1310104 | 2.10E-13  | 0.68 |
| 30131 | 1310806 | 1311420 | 1.17E-51  | 0.83 |
| 30131 | 1314861 | 1315719 | 5.79E-47  | 0.73 |
| 30131 | 1318275 | 1318903 | 5.69E-20  | 0.7  |
| 30131 | 1320877 | 1321341 | 2.22E-43  | 0.95 |
| 30131 | 1321552 | 1322322 | 4.48E-29  | 0.8  |
| 30131 | 1323047 | 1323560 | 2.26E-17  | 0.66 |
| 30131 | 1323815 | 1324049 | 4.62E-28  | 0.93 |
| 30131 | 1326437 | 1327091 | 1.27E-40  | 0.94 |
| 30131 | 1332936 | 1333537 | 4.72E-64  | 0.89 |
| 30131 | 1355764 | 1357556 | 3.28E-61  | 0.78 |
| 30131 | 1372655 | 1373101 | 1.88E-19  | 0.65 |
| 30131 | 1373954 | 1374281 | 1.62E-10  | 0.77 |
| 30131 | 1397126 | 1399313 | 2.90E-73  | 0.73 |
| 30131 | 1402175 | 1403173 | 5.59E-38  | 0.81 |
| 30131 | 1431277 | 1431506 | 1.78E-13  | 0.83 |
| 30131 | 1431737 | 1432412 | 1.39E-36  | 0.96 |
| 30131 | 1433740 | 1434435 | 8.10E-24  | 0.9  |

|       |         |         |           |      |
|-------|---------|---------|-----------|------|
| 30131 | 1434721 | 1434988 | 1.04E-21  | 0.8  |
| 30131 | 1449381 | 1449819 | 8.10E-12  | 0.77 |
| 30131 | 1466269 | 1466672 | 5.08E-15  | 0.78 |
| 30131 | 1487800 | 1488562 | 4.77E-50  | 0.87 |
| 30131 | 1502970 | 1503226 | 3.51E-31  | 0.78 |
| 30131 | 1517879 | 1518965 | 1.24E-59  | 0.78 |
| 30131 | 1520333 | 1520785 | 1.25E-21  | 0.84 |
| 30131 | 1521087 | 1521713 | 2.04E-39  | 0.89 |
| 30131 | 1524566 | 1524927 | 1.18E-26  | 0.87 |
| 30131 | 1528727 | 1530592 | 6.26E-66  | 0.86 |
| 30131 | 1551071 | 1554023 | 5.60E-191 | 0.87 |
| 30131 | 1554243 | 1555301 | 4.01E-75  | 0.86 |
| 30131 | 1558208 | 1559205 | 6.30E-49  | 0.85 |
| 30131 | 1562084 | 1562541 | 4.08E-53  | 0.89 |
| 30131 | 1576614 | 1577547 | 8.06E-48  | 0.81 |
| 30131 | 1577790 | 1578371 | 3.41E-30  | 0.78 |
| 30131 | 1580494 | 1580839 | 1.10E-22  | 0.84 |
| 30131 | 1584545 | 1585096 | 1.20E-22  | 0.93 |
| 30131 | 1608358 | 1609102 | 6.96E-30  | 0.8  |
| 30131 | 1614734 | 1615003 | 4.28E-13  | 0.7  |
| 30131 | 1615542 | 1616305 | 3.49E-30  | 0.81 |
| 30131 | 1634275 | 1634768 | 1.59E-05  | 0.81 |
| 30131 | 1641241 | 1641507 | 6.26E-05  | 0.92 |
| 30131 | 1691952 | 1692437 | 2.92E-38  | 0.91 |
| 30131 | 1692865 | 1693269 | 7.67E-18  | 0.85 |
| 30131 | 1693678 | 1694371 | 1.25E-26  | 0.76 |
| 30131 | 1703095 | 1703450 | 4.51E-52  | 0.68 |
| 30131 | 1722063 | 1722792 | 4.02E-95  | 0.93 |
| 30131 | 1723096 | 1723892 | 1.53E-126 | 0.91 |
| 30131 | 1758139 | 1758411 | 2.18E-12  | 0.79 |
| 30131 | 1761368 | 1762338 | 9.34E-68  | 0.69 |
| 30131 | 1773058 | 1775005 | 1.04E-55  | 0.83 |
| 30131 | 1775686 | 1776287 | 1.59E-89  | 0.91 |
| 30131 | 1799090 | 1799901 | 1.61E-25  | 0.82 |
| 30131 | 1803387 | 1803704 | 3.60E-16  | 0.8  |
| 30131 | 1806547 | 1806997 | 1.89E-29  | 0.87 |
| 30131 | 1820738 | 1821908 | 6.14E-52  | 0.64 |
| 30131 | 1832382 | 1832769 | 1.27E-42  | 0.84 |
| 30131 | 1833837 | 1835173 | 1.07E-53  | 0.61 |
| 30131 | 1838792 | 1839205 | 3.23E-19  | 0.7  |
| 30131 | 1852321 | 1852769 | 1.36E-06  | 0.72 |
| 30131 | 1876477 | 1876726 | 3.99E-19  | 0.89 |
| 30131 | 1881678 | 1882353 | 4.57E-40  | 0.83 |
| 30131 | 1886404 | 1887139 | 4.38E-59  | 0.85 |
| 30131 | 1921550 | 1922157 | 5.59E-30  | 0.77 |
| 30131 | 1929554 | 1930773 | 1.29E-35  | 0.71 |
| 30131 | 1934009 | 1935080 | 3.76E-51  | 0.79 |
| 30131 | 1937076 | 1937547 | 7.17E-49  | 0.84 |
| 30131 | 1939132 | 1939562 | 2.60E-32  | 0.86 |
| 30131 | 1940202 | 1940758 | 2.10E-20  | 0.81 |
| 30131 | 1941169 | 1941715 | 6.03E-20  | 0.86 |
| 30131 | 1943436 | 1943708 | 1.76E-23  | 0.86 |
| 30131 | 1947187 | 1947402 | 5.32E-29  | 0.94 |

|       |         |         |           |      |
|-------|---------|---------|-----------|------|
| 30131 | 1960101 | 1960794 | 9.83E-29  | 0.88 |
| 30131 | 1982803 | 1983270 | 2.40E-21  | 0.79 |
| 30131 | 1982881 | 1983476 | 1.11E-23  | 0.8  |
| 30131 | 1985943 | 1986612 | 3.17E-35  | 0.88 |
| 30131 | 1986838 | 1987105 | 6.00E-27  | 0.92 |
| 30131 | 1987321 | 1987580 | 5.07E-28  | 0.86 |
| 30131 | 2009939 | 2010455 | 1.85E-21  | 0.78 |
| 30131 | 2047075 | 2047319 | 8.69E-14  | 0.78 |
| 30131 | 2054869 | 2055137 | 3.49E-05  | 0.96 |
| 30131 | 2057479 | 2058099 | 2.30E-11  | 0.92 |
| 30131 | 2077278 | 2078333 | 5.13E-45  | 0.85 |
| 30131 | 2078931 | 2079615 | 1.40E-45  | 0.68 |
| 30131 | 2118661 | 2119003 | 5.46E-24  | 0.8  |
| 30131 | 2144656 | 2145408 | 2.12E-33  | 0.66 |
| 30131 | 2145634 | 2146410 | 7.20E-47  | 0.91 |
| 30131 | 2148643 | 2149034 | 2.39E-17  | 0.83 |
| 30131 | 2149755 | 2150297 | 3.74E-18  | 0.87 |
| 30131 | 2150765 | 2151270 | 2.92E-29  | 0.87 |
| 30131 | 2166554 | 2166931 | 1.87E-26  | 0.86 |
| 30131 | 2197012 | 2197339 | 7.39E-08  | 0.67 |
| 30131 | 2211224 | 2211815 | 5.43E-21  | 0.76 |
| 30131 | 2215579 | 2216269 | 3.22E-25  | 0.82 |
| 30131 | 2216875 | 2219275 | 8.38E-66  | 0.8  |
| 30131 | 2221660 | 2223193 | 1.95E-76  | 0.75 |
| 30131 | 2224718 | 2225060 | 4.33E-23  | 0.81 |
| 30131 | 2225623 | 2226254 | 5.51E-25  | 0.78 |
| 30131 | 2252402 | 2252662 | 4.23E-43  | 0.73 |
| 30131 | 2252866 | 2254507 | 2.12E-40  | 0.68 |
| 30131 | 2271293 | 2271815 | 2.19E-28  | 0.66 |
| 30131 | 2272152 | 2272946 | 5.69E-122 | 0.89 |
| 30131 | 2278615 | 2279093 | 1.68E-23  | 0.86 |
| 30131 | 2282380 | 2282929 | 1.06E-65  | 0.76 |
| 30131 | 2296685 | 2297307 | 2.16E-17  | 0.82 |
| 30131 | 2319882 | 2321258 | 3.00E-48  | 0.8  |
| 30131 | 2330585 | 2330880 | 2.28E-10  | 0.84 |
| 30131 | 2353837 | 2354721 | 2.15E-39  | 0.83 |
| 30131 | 2370395 | 2370818 | 5.22E-22  | 0.87 |
| 30131 | 2390055 | 2391129 | 1.42E-57  | 0.85 |
| 30131 | 2392732 | 2392969 | 2.05E-08  | 0.8  |
| 30131 | 2407338 | 2407887 | 6.89E-32  | 0.76 |
| 30131 | 2451250 | 2451718 | 8.58E-26  | 0.92 |
| 30131 | 2452856 | 2453075 | 3.61E-31  | 0.84 |
| 30131 | 2453568 | 2453965 | 1.23E-17  | 0.86 |
| 30131 | 2463182 | 2464017 | 4.00E-32  | 0.78 |
| 30131 | 2463239 | 2464092 | 4.54E-40  | 0.85 |
| 30131 | 2466235 | 2466827 | 1.53E-50  | 0.86 |
| 30131 | 2471467 | 2471723 | 1.43E-19  | 0.82 |
| 30131 | 2473328 | 2473696 | 1.76E-20  | 0.83 |
| 30131 | 2477623 | 2478082 | 3.68E-38  | 0.79 |
| 30131 | 2478474 | 2478873 | 1.10E-35  | 0.85 |
| 30131 | 2497800 | 2498567 | 6.74E-31  | 0.64 |
| 30131 | 2499490 | 2499801 | 5.43E-25  | 0.67 |
| 30131 | 2502648 | 2503013 | 2.58E-36  | 0.89 |

|       |         |         |           |      |
|-------|---------|---------|-----------|------|
| 30131 | 2531352 | 2531917 | 4.23E-45  | 0.89 |
| 30131 | 2532143 | 2532447 | 5.54E-46  | 0.85 |
| 30131 | 2551290 | 2551693 | 2.69E-16  | 0.82 |
| 30131 | 2564366 | 2565215 | 2.96E-86  | 0.84 |
| 30131 | 2565520 | 2566170 | 9.13E-93  | 0.97 |
| 30131 | 2593894 | 2594341 | 6.17E-18  | 0.78 |
| 30131 | 2594910 | 2595349 | 2.00E-18  | 0.82 |
| 30131 | 2595864 | 2596167 | 5.48E-24  | 0.75 |
| 30131 | 2600081 | 2600488 | 1.12E-42  | 0.77 |
| 30131 | 2602019 | 2602856 | 3.58E-22  | 0.85 |
| 30131 | 2608903 | 2609110 | 1.02E-31  | 0.92 |
| 30131 | 2625412 | 2625955 | 6.70E-42  | 0.75 |
| 30131 | 2627301 | 2629143 | 4.33E-61  | 0.76 |
| 30131 | 2633235 | 2634358 | 1.68E-93  | 0.77 |
| 30131 | 2634844 | 2635229 | 6.31E-29  | 0.82 |
| 30131 | 2637734 | 2638162 | 2.22E-55  | 0.72 |
| 30131 | 2643195 | 2643538 | 4.53E-08  | 0.75 |
| 30131 | 2643868 | 2644149 | 2.97E-29  | 0.9  |
| 30131 | 2645079 | 2645759 | 3.12E-67  | 0.91 |
| 30131 | 2654483 | 2654916 | 2.71E-26  | 0.78 |
| 30131 | 2664040 | 2664442 | 9.01E-40  | 0.89 |
| 30131 | 2664648 | 2664852 | 1.05E-07  | 0.89 |
| 30131 | 2682053 | 2682588 | 1.57E-60  | 0.84 |
| 30131 | 2686135 | 2686487 | 8.76E-17  | 0.78 |
| 30132 | 2631    | 2934    | 2.68E-07  | 0.87 |
| 30132 | 7267    | 7534    | 2.66E-09  | 0.86 |
| 30132 | 46321   | 46646   | 6.95E-05  | 0.61 |
| 30133 | 70369   | 70702   | 1.43E-20  | 0.94 |
| 30133 | 74790   | 75109   | 1.10E-53  | 0.97 |
| 30133 | 85999   | 86754   | 1.21E-36  | 0.93 |
| 30133 | 110779  | 111233  | 1.17E-28  | 0.9  |
| 30133 | 123315  | 123716  | 4.71E-08  | 0.8  |
| 30133 | 158111  | 159194  | 1.02E-23  | 0.67 |
| 30134 | 4769    | 5040    | 9.29E-04  | 0.81 |
| 30134 | 11885   | 12182   | 4.80E-06  | 0.81 |
| 30134 | 13654   | 13936   | 3.58E-12  | 0.85 |
| 30134 | 48507   | 48983   | 1.07E-32  | 0.92 |
| 30134 | 59894   | 60621   | 3.93E-35  | 0.81 |
| 30134 | 124600  | 125188  | 1.06E-12  | 0.91 |
| 30134 | 165011  | 165488  | 1.41E-07  | 0.87 |
| 30134 | 180200  | 180404  | 2.31E-06  | 0.78 |
| 30134 | 213554  | 213754  | 2.58E-05  | 0.7  |
| 30134 | 270535  | 271256  | 1.39E-18  | 0.89 |
| 30135 | 49730   | 50884   | 1.15E-68  | 0.78 |
| 30135 | 100310  | 100863  | 1.05E-18  | 0.93 |
| 30135 | 114170  | 114702  | 4.70E-06  | 0.97 |
| 30135 | 144351  | 144556  | 8.70E-06  | 0.76 |
| 30135 | 180173  | 181700  | 3.19E-75  | 0.93 |
| 30135 | 183702  | 184085  | 6.38E-12  | 0.91 |
| 30135 | 222525  | 222975  | 1.38E-25  | 0.93 |
| 30135 | 234288  | 235792  | 6.39E-142 | 0.95 |
| 30135 | 263218  | 263684  | 9.47E-05  | 0.75 |
| 30136 | 6623    | 6824    | 1.42E-11  | 0.8  |

|       |        |        |           |      |
|-------|--------|--------|-----------|------|
| 30136 | 7767   | 8227   | 4.85E-37  | 0.89 |
| 30136 | 9235   | 9614   | 9.20E-20  | 0.82 |
| 30136 | 16774  | 17328  | 1.13E-19  | 0.63 |
| 30136 | 26763  | 27131  | 2.01E-33  | 0.95 |
| 30136 | 44651  | 45034  | 2.76E-17  | 0.94 |
| 30136 | 88619  | 88907  | 4.97E-18  | 0.61 |
| 30136 | 99396  | 99835  | 2.58E-45  | 0.93 |
| 30136 | 100081 | 100514 | 4.69E-44  | 0.9  |
| 30136 | 121335 | 121537 | 9.45E-19  | 0.89 |
| 30136 | 141020 | 141980 | 4.19E-35  | 0.93 |
| 30136 | 171412 | 171736 | 3.06E-19  | 0.97 |
| 30136 | 172114 | 172925 | 5.06E-67  | 0.96 |
| 30136 | 194327 | 195049 | 1.87E-103 | 0.91 |
| 30136 | 196451 | 197139 | 2.68E-36  | 0.73 |
| 30136 | 217695 | 218071 | 8.40E-23  | 0.77 |
| 30136 | 222023 | 222853 | 1.62E-64  | 0.94 |
| 30136 | 257344 | 257718 | 6.38E-18  | 0.94 |
| 30136 | 264099 | 264384 | 3.85E-46  | 0.86 |
| 30136 | 342817 | 343498 | 1.31E-06  | 0.9  |
| 30136 | 399356 | 399817 | 8.86E-16  | 0.88 |
| 30136 | 420015 | 420237 | 2.14E-07  | 0.81 |
| 30136 | 447744 | 448172 | 2.95E-97  | 0.93 |
| 30136 | 457673 | 458391 | 9.11E-33  | 0.76 |
| 30136 | 479232 | 479577 | 4.19E-36  | 0.94 |
| 30136 | 499740 | 500452 | 2.63E-97  | 0.91 |
| 30136 | 501501 | 502343 | 1.34E-45  | 0.67 |
| 30136 | 535613 | 535838 | 9.86E-06  | 0.92 |
| 30136 | 566043 | 566671 | 1.33E-31  | 0.74 |
| 30136 | 619618 | 620634 | 3.16E-24  | 0.81 |
| 30136 | 626774 | 627563 | 4.82E-62  | 0.92 |
| 30136 | 633521 | 633825 | 2.07E-76  | 0.94 |
| 30136 | 643068 | 643581 | 9.62E-22  | 0.84 |
| 30136 | 646213 | 646582 | 2.48E-45  | 0.95 |
| 30136 | 647124 | 647561 | 1.11E-21  | 0.7  |
| 30136 | 651992 | 652947 | 2.16E-79  | 0.82 |
| 30136 | 662124 | 663048 | 1.28E-56  | 0.81 |
| 30136 | 664220 | 665000 | 2.65E-70  | 0.89 |
| 30136 | 667541 | 667885 | 3.48E-29  | 0.85 |
| 30136 | 672224 | 672521 | 3.38E-18  | 0.73 |
| 30136 | 672791 | 673093 | 1.92E-27  | 0.69 |
| 30136 | 674183 | 674548 | 4.26E-12  | 0.78 |
| 30136 | 691999 | 692734 | 1.22E-31  | 0.84 |
| 30136 | 693022 | 693222 | 1.86E-21  | 0.87 |
| 30136 | 702862 | 703249 | 2.54E-10  | 0.92 |
| 30136 | 725082 | 725426 | 2.23E-27  | 0.96 |
| 30136 | 738892 | 739424 | 6.49E-14  | 0.89 |
| 30136 | 746791 | 747192 | 5.44E-21  | 0.88 |
| 30136 | 766090 | 766696 | 4.93E-04  | 0.71 |
| 30136 | 768400 | 769121 | 2.22E-11  | 0.78 |
| 30136 | 881447 | 881752 | 7.76E-34  | 0.95 |
| 30136 | 882784 | 883189 | 6.22E-40  | 0.98 |
| 30136 | 884338 | 884737 | 2.95E-54  | 0.98 |
| 30136 | 888901 | 889187 | 1.95E-41  | 0.88 |

|       |         |         |           |      |
|-------|---------|---------|-----------|------|
| 30136 | 893183  | 893619  | 7.77E-50  | 0.96 |
| 30136 | 935632  | 936162  | 8.30E-45  | 0.97 |
| 30136 | 978275  | 979026  | 6.38E-102 | 0.94 |
| 30136 | 1018747 | 1018972 | 4.09E-12  | 0.78 |
| 30136 | 1038455 | 1038738 | 9.84E-09  | 0.82 |
| 30136 | 1062092 | 1062321 | 5.47E-10  | 0.74 |
| 30136 | 1073780 | 1074651 | 1.47E-105 | 0.89 |
| 30136 | 1075976 | 1076865 | 4.33E-157 | 0.97 |
| 30136 | 1092086 | 1093482 | 3.70E-80  | 0.73 |
| 30136 | 1093708 | 1094501 | 5.72E-17  | 0.89 |
| 30136 | 1095801 | 1097859 | 4.03E-49  | 0.73 |
| 30136 | 1098826 | 1099601 | 8.51E-47  | 0.92 |
| 30136 | 1100043 | 1100944 | 2.05E-59  | 0.87 |
| 30136 | 1102563 | 1103433 | 6.18E-54  | 0.85 |
| 30136 | 1103665 | 1103873 | 2.24E-12  | 0.9  |
| 30136 | 1104177 | 1104666 | 3.17E-28  | 0.91 |
| 30136 | 1106449 | 1106817 | 5.46E-29  | 0.95 |
| 30136 | 1107105 | 1108436 | 3.40E-81  | 0.74 |
| 30136 | 1133849 | 1134517 | 9.08E-52  | 0.88 |
| 30136 | 1141378 | 1141812 | 4.74E-32  | 0.86 |
| 30136 | 1142293 | 1142598 | 1.71E-20  | 0.87 |
| 30136 | 1145597 | 1145899 | 3.50E-40  | 0.95 |
| 30136 | 1146203 | 1146548 | 2.19E-38  | 0.94 |
| 30136 | 1148024 | 1148524 | 4.36E-47  | 0.87 |
| 30136 | 1149146 | 1150007 | 4.31E-36  | 0.91 |
| 30136 | 1156504 | 1156969 | 3.07E-27  | 0.94 |
| 30136 | 1157415 | 1157993 | 4.06E-38  | 0.96 |
| 30136 | 1184263 | 1184612 | 1.20E-18  | 0.71 |
| 30137 | 44586   | 44792   | 1.20E-07  | 0.83 |
| 30137 | 56733   | 57542   | 5.34E-36  | 0.75 |
| 30137 | 73448   | 73905   | 2.69E-17  | 0.67 |
| 30137 | 93023   | 93439   | 5.45E-06  | 0.96 |
| 30137 | 136017  | 136647  | 3.92E-32  | 0.8  |
| 30137 | 163563  | 163802  | 1.93E-55  | 0.97 |
| 30137 | 167012  | 167446  | 6.99E-18  | 0.74 |
| 30137 | 171051  | 171355  | 3.36E-09  | 0.7  |
| 30137 | 174287  | 175674  | 2.56E-97  | 0.94 |
| 30137 | 230875  | 231948  | 3.35E-31  | 0.83 |
| 30137 | 248646  | 249432  | 7.83E-33  | 0.8  |
| 30137 | 252766  | 253135  | 1.23E-43  | 0.77 |
| 30137 | 253523  | 253881  | 7.25E-09  | 0.8  |
| 30137 | 265658  | 266059  | 1.66E-24  | 0.93 |
| 30137 | 267651  | 267951  | 5.66E-38  | 0.95 |
| 30137 | 268244  | 268544  | 2.43E-20  | 0.93 |
| 30137 | 268764  | 269171  | 1.24E-18  | 0.88 |
| 30137 | 283727  | 284031  | 1.26E-14  | 0.8  |
| 30137 | 290539  | 290879  | 1.03E-18  | 0.94 |
| 30137 | 323538  | 324105  | 1.16E-33  | 0.92 |
| 30137 | 325378  | 325851  | 6.67E-24  | 0.86 |
| 30137 | 326836  | 327205  | 8.55E-35  | 0.94 |
| 30137 | 328717  | 328991  | 1.98E-16  | 0.88 |
| 30138 | 10495   | 10827   | 3.45E-17  | 0.82 |
| 30138 | 11065   | 12028   | 3.55E-53  | 0.88 |

|       |        |        |          |      |
|-------|--------|--------|----------|------|
| 30138 | 40697  | 40962  | 1.04E-10 | 0.75 |
| 30138 | 41779  | 42643  | 2.79E-55 | 0.92 |
| 30138 | 42953  | 44625  | 5.01E-98 | 0.84 |
| 30138 | 53040  | 53370  | 1.15E-12 | 0.81 |
| 30138 | 69023  | 69725  | 2.94E-42 | 0.88 |
| 30138 | 72517  | 74546  | 3.53E-75 | 0.74 |
| 30138 | 74777  | 75589  | 9.91E-56 | 0.89 |
| 30138 | 87072  | 87304  | 2.15E-14 | 0.81 |
| 30138 | 106968 | 107240 | 9.38E-12 | 0.6  |
| 30138 | 113671 | 113996 | 4.13E-10 | 0.83 |
| 30138 | 120568 | 120834 | 7.02E-27 | 0.89 |
| 30138 | 122019 | 122304 | 2.82E-44 | 0.93 |
| 30138 | 131520 | 132177 | 1.52E-08 | 0.89 |
| 30138 | 152409 | 153791 | 1.67E-34 | 0.73 |
| 30138 | 182686 | 183351 | 1.21E-52 | 0.71 |
| 30138 | 215318 | 215628 | 1.73E-12 | 0.81 |
| 30138 | 227938 | 229973 | 4.92E-74 | 0.78 |
| 30138 | 276588 | 277708 | 8.71E-47 | 0.79 |
| 30138 | 295150 | 295479 | 1.17E-23 | 0.89 |
| 30138 | 300023 | 300495 | 1.94E-30 | 0.9  |
| 30138 | 324104 | 324487 | 3.71E-57 | 0.96 |
| 30138 | 325100 | 325388 | 6.54E-27 | 0.89 |
| 30138 | 329236 | 329952 | 2.01E-30 | 0.78 |
| 30138 | 352376 | 352718 | 2.20E-17 | 0.8  |
| 30138 | 365364 | 365974 | 3.73E-30 | 0.77 |
| 30138 | 388687 | 388951 | 8.62E-16 | 0.91 |
| 30138 | 390134 | 390544 | 8.34E-21 | 0.72 |
| 30138 | 394753 | 394977 | 1.17E-09 | 0.62 |
| 30138 | 431268 | 431849 | 4.34E-22 | 0.76 |
| 30138 | 437116 | 438899 | 7.59E-81 | 0.78 |
| 30138 | 452091 | 452348 | 6.68E-18 | 0.84 |
| 30138 | 455377 | 455780 | 4.62E-21 | 0.77 |
| 30138 | 464658 | 465502 | 1.05E-40 | 0.78 |
| 30138 | 465902 | 466307 | 1.56E-15 | 0.79 |
| 30138 | 466945 | 468010 | 2.89E-86 | 0.9  |
| 30138 | 491454 | 491712 | 1.94E-24 | 0.77 |
| 30138 | 491965 | 492491 | 2.17E-29 | 0.91 |
| 30138 | 502749 | 503745 | 3.17E-60 | 0.84 |
| 30138 | 509739 | 511324 | 6.12E-53 | 0.68 |
| 30138 | 511538 | 512337 | 8.75E-39 | 0.71 |
| 30138 | 527009 | 527892 | 9.36E-64 | 0.64 |
| 30138 | 528435 | 528883 | 9.56E-51 | 0.89 |
| 30138 | 533121 | 533771 | 2.96E-27 | 0.89 |
| 30138 | 535586 | 537378 | 1.49E-40 | 0.73 |
| 30138 | 555585 | 555812 | 2.10E-16 | 0.95 |
| 30138 | 567102 | 567371 | 5.36E-33 | 0.7  |
| 30138 | 568422 | 569091 | 3.15E-61 | 0.91 |
| 30138 | 572276 | 573319 | 2.08E-93 | 0.69 |
| 30138 | 616273 | 617140 | 2.26E-56 | 0.76 |
| 30138 | 669254 | 669457 | 2.23E-49 | 0.77 |
| 30138 | 681507 | 681828 | 1.66E-29 | 0.92 |
| 30138 | 685154 | 687276 | 6.07E-78 | 0.76 |
| 30138 | 753214 | 753588 | 1.99E-26 | 0.65 |

|       |         |         |          |      |
|-------|---------|---------|----------|------|
| 30138 | 787913  | 788315  | 1.36E-13 | 0.82 |
| 30138 | 797619  | 797986  | 2.50E-18 | 0.81 |
| 30138 | 861261  | 861618  | 1.32E-25 | 0.82 |
| 30138 | 904655  | 905086  | 2.23E-23 | 0.84 |
| 30138 | 906882  | 907938  | 1.55E-22 | 0.62 |
| 30138 | 910836  | 911095  | 4.37E-25 | 0.92 |
| 30138 | 917517  | 918525  | 2.22E-36 | 0.69 |
| 30138 | 935375  | 935770  | 2.03E-66 | 0.92 |
| 30138 | 944823  | 945260  | 1.25E-83 | 0.92 |
| 30138 | 946623  | 947427  | 4.72E-55 | 0.89 |
| 30138 | 984680  | 985293  | 9.91E-37 | 0.81 |
| 30138 | 1009623 | 1009946 | 2.11E-67 | 0.81 |
| 30138 | 1010211 | 1010887 | 4.81E-54 | 0.81 |
| 30138 | 1014676 | 1015115 | 8.41E-31 | 0.87 |
| 30138 | 1034284 | 1034816 | 9.08E-32 | 0.81 |
| 30138 | 1038456 | 1039413 | 8.32E-47 | 0.87 |
| 30138 | 1048822 | 1049177 | 9.28E-18 | 0.9  |
| 30138 | 1050688 | 1051125 | 6.08E-31 | 0.89 |
| 30138 | 1053064 | 1053275 | 4.34E-11 | 0.82 |
| 30138 | 1065456 | 1065949 | 1.27E-22 | 0.96 |
| 30138 | 1066161 | 1066440 | 5.95E-35 | 0.72 |
| 30138 | 1066866 | 1067316 | 2.77E-44 | 0.9  |
| 30138 | 1067831 | 1068302 | 1.10E-21 | 0.79 |
| 30138 | 1105987 | 1106335 | 1.07E-07 | 0.82 |
| 30138 | 1109064 | 1109510 | 4.81E-26 | 0.8  |
| 30138 | 1122362 | 1122610 | 4.26E-21 | 0.81 |
| 30138 | 1124523 | 1124958 | 1.94E-25 | 0.78 |
| 30138 | 1143111 | 1143459 | 1.55E-16 | 0.79 |
| 30138 | 1143784 | 1144253 | 2.64E-27 | 0.77 |
| 30138 | 1147515 | 1148216 | 2.50E-20 | 0.71 |
| 30138 | 1154931 | 1155463 | 1.82E-32 | 0.83 |
| 30138 | 1157930 | 1158215 | 6.03E-18 | 0.81 |
| 30138 | 1161596 | 1162689 | 1.83E-88 | 0.87 |
| 30138 | 1163358 | 1164868 | 6.17E-84 | 0.86 |
| 30138 | 1171974 | 1172226 | 1.23E-15 | 0.78 |
| 30138 | 1190039 | 1190250 | 6.44E-08 | 0.84 |
| 30138 | 1234794 | 1235562 | 1.94E-28 | 0.85 |
| 30138 | 1235803 | 1237010 | 2.07E-55 | 0.8  |
| 30138 | 1241301 | 1241768 | 6.63E-25 | 0.65 |
| 30138 | 1246134 | 1247561 | 1.11E-64 | 0.83 |
| 30138 | 1250258 | 1250611 | 1.29E-19 | 0.78 |
| 30138 | 1254161 | 1254595 | 5.45E-30 | 0.83 |
| 30138 | 1298662 | 1299830 | 1.04E-42 | 0.75 |
| 30138 | 1300395 | 1301094 | 3.08E-49 | 0.89 |
| 30138 | 1317420 | 1317906 | 9.82E-39 | 0.71 |
| 30138 | 1321621 | 1321855 | 9.94E-11 | 0.78 |
| 30138 | 1324107 | 1324842 | 2.41E-21 | 0.82 |
| 30138 | 1324474 | 1324893 | 7.61E-15 | 0.8  |
| 30138 | 1326952 | 1327546 | 4.21E-70 | 0.85 |
| 30138 | 1330845 | 1331427 | 1.63E-17 | 0.85 |
| 30138 | 1340605 | 1340861 | 1.25E-10 | 0.67 |
| 30138 | 1365771 | 1366417 | 6.16E-09 | 0.61 |
| 30138 | 1373166 | 1374203 | 1.52E-55 | 0.79 |



|       |         |         |           |      |
|-------|---------|---------|-----------|------|
| 30138 | 1374783 | 1375524 | 8.59E-35  | 0.63 |
| 30138 | 1377276 | 1377812 | 2.55E-10  | 0.78 |
| 30138 | 1382271 | 1382588 | 4.50E-37  | 0.82 |
| 30138 | 1387044 | 1387361 | 7.17E-33  | 0.76 |
| 30138 | 1413022 | 1414164 | 2.50E-35  | 0.79 |
| 30138 | 1423686 | 1424113 | 4.86E-22  | 0.73 |
| 30138 | 1424959 | 1425803 | 1.58E-98  | 0.86 |
| 30138 | 1426630 | 1427004 | 4.90E-30  | 0.73 |
| 30138 | 1466768 | 1467103 | 4.18E-26  | 0.93 |
| 30138 | 1470869 | 1471220 | 3.20E-14  | 0.91 |
| 30138 | 1471530 | 1472575 | 1.16E-72  | 0.84 |
| 30138 | 1490006 | 1490362 | 1.05E-26  | 0.84 |
| 30138 | 1495019 | 1495697 | 1.34E-61  | 0.92 |
| 30138 | 1518319 | 1518542 | 7.33E-21  | 0.87 |
| 30138 | 1520195 | 1520660 | 3.47E-29  | 0.81 |
| 30138 | 1525582 | 1526333 | 6.82E-23  | 0.67 |
| 30138 | 1526562 | 1527033 | 4.05E-22  | 0.82 |
| 30138 | 1529612 | 1529963 | 3.79E-07  | 0.69 |
| 30138 | 1569400 | 1570732 | 2.00E-51  | 0.68 |
| 30138 | 1608549 | 1608875 | 7.14E-34  | 0.93 |
| 30138 | 1609165 | 1609911 | 1.49E-54  | 0.91 |
| 30138 | 1628527 | 1629271 | 5.26E-26  | 0.88 |
| 30138 | 1629603 | 1630687 | 1.90E-69  | 0.78 |
| 30138 | 1657848 | 1658873 | 1.11E-67  | 0.72 |
| 30138 | 1660907 | 1661163 | 1.53E-31  | 0.8  |
| 30138 | 1681555 | 1682143 | 5.57E-23  | 0.86 |
| 30138 | 1683174 | 1684425 | 3.22E-60  | 0.8  |
| 30138 | 1686759 | 1686987 | 3.18E-14  | 0.98 |
| 30139 | 2748    | 3194    | 1.12E-03  | 0.88 |
| 30139 | 7798    | 8111    | 2.26E-05  | 1    |
| 30139 | 49350   | 49814   | 7.86E-07  | 0.83 |
| 30139 | 49370   | 49885   | 1.29E-06  | 0.8  |
| 30140 | 8437    | 8683    | 6.26E-26  | 0.97 |
| 30140 | 39873   | 40359   | 1.31E-06  | 1    |
| 30140 | 119695  | 120034  | 1.54E-15  | 0.83 |
| 30140 | 285815  | 286099  | 7.27E-23  | 0.96 |
| 30140 | 290614  | 290990  | 2.30E-25  | 0.87 |
| 30140 | 291462  | 291737  | 1.46E-06  | 0.68 |
| 30140 | 329908  | 330133  | 2.29E-11  | 0.89 |
| 30140 | 351745  | 352201  | 1.24E-12  | 0.93 |
| 30140 | 354198  | 354557  | 2.11E-11  | 0.97 |
| 30140 | 401658  | 402696  | 7.61E-48  | 0.61 |
| 30140 | 404237  | 405152  | 2.44E-78  | 0.92 |
| 30140 | 555356  | 556385  | 1.57E-13  | 0.94 |
| 30140 | 629144  | 630419  | 6.48E-87  | 0.94 |
| 30140 | 630661  | 631037  | 1.02E-30  | 0.98 |
| 30140 | 643812  | 645314  | 3.47E-290 | 0.95 |
| 30140 | 646160  | 647009  | 7.59E-156 | 0.93 |
| 30140 | 705649  | 706029  | 1.98E-05  | 0.97 |
| 30140 | 706494  | 706939  | 1.21E-10  | 0.91 |
| 30140 | 834446  | 834722  | 8.25E-32  | 0.92 |
| 30140 | 859153  | 859395  | 5.22E-12  | 0.8  |
| 30140 | 862194  | 862999  | 7.94E-46  | 0.96 |

|       |         |         |          |      |
|-------|---------|---------|----------|------|
| 30140 | 868006  | 868399  | 2.61E-06 | 0.9  |
| 30140 | 869700  | 869953  | 2.36E-04 | 0.79 |
| 30140 | 890969  | 891735  | 5.00E-06 | 0.94 |
| 30140 | 1056353 | 1056588 | 2.78E-06 | 0.96 |
| 30140 | 1197178 | 1197586 | 5.16E-07 | 0.98 |
| 30140 | 1280109 | 1280387 | 1.81E-05 | 0.88 |
| 30141 | 44411   | 45035   | 4.83E-21 | 0.89 |
| 30141 | 60308   | 60628   | 2.90E-07 | 0.79 |
| 30141 | 103250  | 103997  | 4.92E-62 | 0.91 |
| 30141 | 146631  | 147049  | 6.38E-04 | 1    |
| 30141 | 244889  | 245321  | 9.42E-25 | 0.88 |
| 30141 | 255459  | 255940  | 3.04E-06 | 0.96 |
| 30141 | 255714  | 255973  | 8.65E-05 | 1    |
| 30141 | 261235  | 261448  | 2.34E-14 | 0.86 |
| 30141 | 262368  | 262976  | 2.93E-16 | 0.82 |
| 30141 | 267486  | 267892  | 1.84E-08 | 0.8  |
| 30141 | 278654  | 279086  | 8.15E-17 | 0.9  |
| 30142 | 5509    | 6051    | 2.65E-37 | 0.8  |
| 30142 | 21305   | 22481   | 4.02E-44 | 0.66 |
| 30142 | 22720   | 23504   | 6.09E-48 | 0.8  |
| 30142 | 29994   | 30462   | 3.11E-24 | 0.88 |
| 30142 | 48955   | 49357   | 1.44E-15 | 0.84 |
| 30142 | 68100   | 68701   | 2.93E-12 | 0.87 |
| 30142 | 69080   | 70489   | 1.24E-59 | 0.83 |
| 30142 | 75702   | 76956   | 4.68E-35 | 0.79 |
| 30142 | 79485   | 79874   | 4.31E-72 | 0.91 |
| 30142 | 81970   | 82188   | 9.29E-45 | 0.86 |
| 30142 | 95753   | 95957   | 2.98E-17 | 0.82 |
| 30142 | 96393   | 96719   | 7.00E-12 | 0.77 |
| 30142 | 100213  | 101483  | 1.90E-62 | 0.88 |
| 30142 | 102350  | 103383  | 4.27E-59 | 0.81 |
| 30142 | 108038  | 109754  | 5.56E-74 | 0.87 |
| 30142 | 126920  | 127377  | 1.13E-07 | 0.61 |
| 30142 | 129301  | 129727  | 1.22E-10 | 0.88 |
| 30142 | 131597  | 132055  | 3.52E-30 | 0.76 |
| 30142 | 141836  | 142701  | 1.76E-27 | 0.79 |
| 30142 | 145101  | 145522  | 2.31E-06 | 0.91 |
| 30142 | 147397  | 147963  | 5.81E-18 | 0.83 |
| 30142 | 150913  | 151122  | 1.44E-08 | 0.91 |
| 30142 | 153811  | 154237  | 9.26E-20 | 0.9  |
| 30142 | 155822  | 156358  | 1.96E-34 | 0.85 |
| 30142 | 156586  | 157619  | 4.49E-48 | 0.79 |
| 30142 | 176498  | 177264  | 4.42E-35 | 0.82 |
| 30142 | 177889  | 178722  | 1.27E-25 | 0.84 |
| 30142 | 180908  | 181450  | 1.90E-26 | 0.66 |
| 30142 | 182197  | 182590  | 5.15E-46 | 0.77 |
| 30142 | 196779  | 196983  | 9.27E-09 | 0.95 |
| 30142 | 213159  | 213420  | 4.42E-12 | 0.76 |
| 30142 | 213954  | 214532  | 1.20E-33 | 0.8  |
| 30142 | 219620  | 219824  | 9.18E-09 | 0.82 |
| 30142 | 260959  | 261460  | 3.28E-25 | 0.71 |
| 30142 | 265015  | 265236  | 4.73E-16 | 0.88 |
| 30142 | 279928  | 280478  | 2.76E-13 | 0.88 |

|       |        |        |          |      |
|-------|--------|--------|----------|------|
| 30142 | 285579 | 286425 | 1.22E-25 | 0.86 |
| 30142 | 288047 | 288616 | 7.02E-27 | 0.9  |
| 30142 | 290475 | 290913 | 4.32E-24 | 0.87 |
| 30142 | 293261 | 293791 | 6.55E-21 | 0.82 |
| 30142 | 308029 | 309094 | 3.66E-29 | 0.83 |
| 30142 | 309493 | 311047 | 3.50E-51 | 0.91 |
| 30142 | 350174 | 350433 | 1.10E-12 | 0.63 |
| 30142 | 375874 | 376144 | 1.38E-27 | 0.93 |
| 30143 | 1636   | 2522   | 1.85E-49 | 0.78 |
| 30143 | 5860   | 6220   | 3.30E-07 | 0.81 |
| 30143 | 11526  | 12382  | 1.76E-47 | 0.79 |
| 30143 | 12750  | 13538  | 1.48E-61 | 0.86 |
| 30143 | 14780  | 16555  | 2.67E-51 | 0.83 |
| 30143 | 62327  | 62610  | 9.75E-09 | 0.7  |
| 30143 | 72005  | 72512  | 5.09E-42 | 0.87 |
| 30143 | 73774  | 74822  | 6.01E-62 | 0.84 |
| 30143 | 101119 | 101890 | 1.75E-27 | 0.8  |
| 30143 | 137599 | 137943 | 2.02E-18 | 0.76 |
| 30143 | 164240 | 164571 | 2.43E-21 | 0.88 |
| 30143 | 168228 | 168640 | 1.14E-46 | 0.78 |
| 30143 | 169548 | 169987 | 1.36E-29 | 0.87 |
| 30143 | 184241 | 184844 | 7.75E-24 | 0.8  |
| 30143 | 198743 | 199499 | 1.67E-10 | 0.77 |
| 30143 | 210303 | 210615 | 1.17E-13 | 0.83 |
| 30143 | 210870 | 211312 | 1.21E-17 | 0.82 |
| 30143 | 241133 | 241477 | 1.41E-15 | 0.75 |
| 30143 | 259375 | 260212 | 2.51E-65 | 0.86 |
| 30143 | 271026 | 271721 | 8.10E-36 | 0.7  |
| 30143 | 276411 | 276795 | 1.53E-20 | 0.81 |
| 30143 | 286352 | 287106 | 1.84E-26 | 0.77 |
| 30143 | 288269 | 288741 | 1.01E-16 | 0.8  |
| 30143 | 296186 | 296980 | 1.55E-42 | 0.68 |
| 30143 | 298917 | 299301 | 7.58E-30 | 0.77 |
| 30143 | 302981 | 303446 | 2.66E-37 | 0.83 |
| 30143 | 303674 | 303946 | 2.86E-18 | 0.84 |
| 30143 | 321016 | 321290 | 4.98E-19 | 0.7  |
| 30143 | 321787 | 322198 | 5.91E-20 | 0.8  |
| 30143 | 322438 | 322894 | 3.33E-32 | 0.83 |
| 30143 | 325406 | 325823 | 5.54E-26 | 0.82 |
| 30143 | 341360 | 341808 | 5.66E-07 | 0.96 |
| 30143 | 367429 | 368072 | 3.48E-37 | 0.85 |
| 30143 | 368297 | 368999 | 1.18E-44 | 0.88 |
| 30143 | 377166 | 377577 | 6.06E-18 | 0.78 |
| 30143 | 378684 | 378921 | 6.31E-09 | 0.78 |
| 30143 | 379532 | 380235 | 5.66E-10 | 0.81 |
| 30143 | 403038 | 403643 | 2.46E-28 | 0.83 |
| 30143 | 404249 | 405626 | 1.29E-70 | 0.74 |
| 30143 | 457805 | 458491 | 1.91E-10 | 0.68 |
| 30143 | 488864 | 489241 | 4.00E-47 | 0.9  |
| 30144 | 18194  | 18504  | 2.28E-04 | 0.75 |
| 30144 | 22252  | 22499  | 4.28E-05 | 0.87 |
| 30144 | 100769 | 101034 | 2.52E-21 | 0.87 |
| 30144 | 106686 | 107393 | 1.77E-04 | 0.62 |

|       |         |         |           |      |
|-------|---------|---------|-----------|------|
| 30145 | 117306  | 117578  | 1.47E-06  | 0.88 |
| 30145 | 122801  | 123022  | 2.05E-05  | 0.91 |
| 30146 | 22009   | 23774   | 4.11E-43  | 0.7  |
| 30146 | 30636   | 31025   | 2.27E-04  | 0.84 |
| 30146 | 44504   | 45240   | 7.86E-30  | 0.82 |
| 30146 | 65589   | 66425   | 2.84E-48  | 0.8  |
| 30146 | 89945   | 90208   | 3.55E-27  | 0.86 |
| 30146 | 92285   | 93482   | 3.93E-73  | 0.81 |
| 30146 | 102435  | 102735  | 1.39E-14  | 0.81 |
| 30146 | 103344  | 104422  | 4.38E-24  | 0.73 |
| 30146 | 125212  | 125849  | 5.53E-43  | 0.89 |
| 30146 | 133976  | 134475  | 6.58E-05  | 0.96 |
| 30146 | 157236  | 157462  | 1.75E-10  | 0.79 |
| 30146 | 214584  | 215048  | 7.23E-29  | 0.77 |
| 30146 | 268078  | 268566  | 7.73E-50  | 0.93 |
| 30146 | 269536  | 270155  | 1.13E-109 | 0.94 |
| 30146 | 270637  | 271323  | 2.76E-35  | 0.92 |
| 30146 | 377543  | 377891  | 1.18E-22  | 0.77 |
| 30146 | 436177  | 436558  | 1.81E-22  | 0.91 |
| 30146 | 494846  | 495688  | 7.79E-62  | 0.77 |
| 30146 | 495920  | 498068  | 1.43E-168 | 0.86 |
| 30146 | 504853  | 505793  | 9.40E-68  | 0.95 |
| 30146 | 530777  | 531172  | 6.27E-21  | 0.65 |
| 30146 | 545073  | 545507  | 2.10E-18  | 0.79 |
| 30146 | 569287  | 569914  | 7.36E-40  | 0.89 |
| 30146 | 570154  | 570366  | 2.23E-16  | 0.82 |
| 30146 | 582064  | 582963  | 1.58E-47  | 0.88 |
| 30146 | 622539  | 623755  | 2.06E-40  | 0.79 |
| 30146 | 624961  | 625523  | 2.89E-61  | 0.94 |
| 30146 | 731088  | 731854  | 2.82E-29  | 0.74 |
| 30146 | 813731  | 814216  | 1.42E-20  | 0.88 |
| 30146 | 860324  | 861507  | 2.29E-61  | 0.86 |
| 30146 | 875096  | 875330  | 3.42E-35  | 0.91 |
| 30146 | 876100  | 876760  | 1.01E-57  | 0.84 |
| 30146 | 881794  | 882906  | 4.44E-42  | 0.69 |
| 30146 | 884985  | 886011  | 5.64E-51  | 0.87 |
| 30146 | 898560  | 898934  | 7.46E-27  | 0.93 |
| 30146 | 912816  | 913806  | 1.13E-35  | 0.63 |
| 30146 | 940853  | 941980  | 8.91E-50  | 0.66 |
| 30146 | 943739  | 944007  | 3.36E-30  | 0.9  |
| 30146 | 977906  | 978157  | 1.82E-11  | 0.71 |
| 30146 | 1004934 | 1005420 | 6.30E-26  | 0.81 |
| 30146 | 1005055 | 1005899 | 1.75E-29  | 0.81 |
| 30146 | 1016421 | 1016672 | 3.67E-07  | 0.72 |
| 30146 | 1016867 | 1017538 | 3.09E-24  | 0.79 |
| 30146 | 1046113 | 1047600 | 7.62E-50  | 0.81 |
| 30146 | 1062273 | 1063168 | 1.71E-110 | 0.9  |
| 30146 | 1102441 | 1102830 | 1.44E-55  | 0.92 |
| 30146 | 1135670 | 1135939 | 4.83E-19  | 0.8  |
| 30146 | 1152259 | 1152463 | 1.83E-10  | 0.85 |
| 30146 | 1153098 | 1154714 | 6.49E-109 | 0.9  |
| 30146 | 1155445 | 1155806 | 4.31E-20  | 0.85 |
| 30146 | 1171178 | 1171619 | 1.02E-19  | 0.76 |

|       |         |         |           |      |
|-------|---------|---------|-----------|------|
| 30146 | 1212750 | 1213290 | 3.03E-62  | 0.88 |
| 30146 | 1216564 | 1217127 | 4.93E-15  | 0.8  |
| 30146 | 1220850 | 1221143 | 4.15E-22  | 0.63 |
| 30146 | 1242335 | 1242880 | 3.96E-30  | 0.84 |
| 30146 | 1243254 | 1244971 | 1.80E-75  | 0.85 |
| 30146 | 1245173 | 1245476 | 1.48E-18  | 0.61 |
| 30146 | 1316915 | 1317286 | 4.98E-53  | 0.9  |
| 30146 | 1321528 | 1322018 | 3.31E-30  | 0.79 |
| 30146 | 1335222 | 1335459 | 2.19E-21  | 0.65 |
| 30147 | 10558   | 10795   | 4.06E-10  | 0.79 |
| 30147 | 12398   | 13182   | 1.95E-40  | 0.85 |
| 30147 | 14234   | 14891   | 2.34E-28  | 0.85 |
| 30147 | 15118   | 15581   | 1.82E-23  | 0.88 |
| 30147 | 15841   | 17203   | 1.08E-56  | 0.8  |
| 30147 | 46885   | 47401   | 2.87E-14  | 0.79 |
| 30147 | 69767   | 70149   | 6.21E-24  | 0.91 |
| 30147 | 71210   | 71920   | 9.62E-50  | 0.9  |
| 30147 | 93140   | 94457   | 3.52E-87  | 0.74 |
| 30147 | 124975  | 125488  | 4.75E-50  | 0.64 |
| 30147 | 139747  | 140546  | 2.48E-37  | 0.89 |
| 30147 | 145734  | 146070  | 1.84E-13  | 0.75 |
| 30147 | 146396  | 147423  | 5.22E-28  | 0.74 |
| 30147 | 170767  | 171089  | 8.01E-13  | 0.9  |
| 30147 | 175607  | 176545  | 3.67E-38  | 0.84 |
| 30147 | 179987  | 180297  | 1.15E-13  | 0.91 |
| 30147 | 181308  | 181890  | 1.18E-13  | 0.77 |
| 30147 | 203433  | 203907  | 8.82E-19  | 0.7  |
| 30147 | 327599  | 327800  | 7.60E-34  | 0.97 |
| 30147 | 340487  | 340911  | 1.39E-28  | 0.88 |
| 30147 | 383914  | 386405  | 1.07E-96  | 0.74 |
| 30147 | 416269  | 417682  | 2.62E-71  | 0.8  |
| 30147 | 427645  | 428338  | 3.04E-33  | 0.8  |
| 30147 | 428946  | 429213  | 2.10E-18  | 0.76 |
| 30147 | 431794  | 432881  | 1.39E-53  | 0.76 |
| 30147 | 433095  | 433459  | 2.90E-25  | 0.72 |
| 30147 | 436866  | 438283  | 4.40E-64  | 0.88 |
| 30147 | 478001  | 478925  | 2.42E-31  | 0.8  |
| 30147 | 516281  | 516920  | 7.68E-45  | 0.81 |
| 30147 | 517260  | 517953  | 3.39E-59  | 0.76 |
| 30147 | 533430  | 533669  | 2.04E-52  | 0.92 |
| 30147 | 534784  | 535252  | 1.03E-34  | 0.93 |
| 30147 | 535594  | 535957  | 5.52E-16  | 0.7  |
| 30147 | 536512  | 537552  | 3.22E-109 | 0.91 |
| 30147 | 564996  | 565317  | 3.96E-09  | 0.18 |
| 30147 | 635778  | 638722  | 1.15E-302 | 0.89 |
| 30147 | 668216  | 668684  | 1.25E-21  | 0.81 |
| 30147 | 668904  | 669258  | 1.03E-20  | 0.81 |
| 30147 | 672526  | 672908  | 7.83E-24  | 0.89 |
| 30147 | 673229  | 673457  | 4.52E-24  | 0.92 |
| 30147 | 674681  | 674978  | 5.23E-20  | 0.73 |
| 30147 | 708084  | 708545  | 9.57E-22  | 0.86 |
| 30147 | 708798  | 709635  | 1.52E-36  | 0.87 |
| 30147 | 711347  | 711654  | 3.28E-34  | 0.97 |

|       |         |         |           |      |
|-------|---------|---------|-----------|------|
| 30147 | 726641  | 727291  | 1.94E-19  | 0.74 |
| 30147 | 762286  | 762850  | 1.79E-17  | 0.84 |
| 30147 | 763103  | 763478  | 3.21E-31  | 0.86 |
| 30147 | 766444  | 768234  | 4.71E-64  | 0.85 |
| 30147 | 768782  | 769008  | 1.55E-14  | 0.88 |
| 30147 | 770529  | 771242  | 1.39E-31  | 0.9  |
| 30147 | 772017  | 772301  | 1.99E-22  | 0.8  |
| 30147 | 775044  | 776726  | 8.37E-64  | 0.78 |
| 30147 | 783005  | 783244  | 3.18E-18  | 0.73 |
| 30147 | 784267  | 785568  | 2.23E-144 | 0.7  |
| 30147 | 790956  | 791466  | 2.61E-21  | 0.74 |
| 30147 | 792110  | 792624  | 4.14E-27  | 0.84 |
| 30147 | 808735  | 809198  | 4.42E-13  | 0.88 |
| 30147 | 809454  | 810165  | 4.17E-36  | 0.9  |
| 30147 | 825447  | 825760  | 6.36E-10  | 0.72 |
| 30147 | 866270  | 866490  | 1.15E-19  | 0.77 |
| 30147 | 888890  | 889258  | 1.15E-35  | 0.91 |
| 30147 | 902389  | 902991  | 1.09E-30  | 0.77 |
| 30147 | 922003  | 922757  | 2.73E-52  | 0.84 |
| 30147 | 923055  | 923709  | 2.48E-45  | 0.93 |
| 30147 | 924110  | 925250  | 1.07E-45  | 0.78 |
| 30147 | 985773  | 986219  | 4.28E-16  | 0.73 |
| 30147 | 988064  | 988429  | 1.56E-75  | 0.89 |
| 30147 | 998112  | 998360  | 6.12E-14  | 0.81 |
| 30147 | 1023292 | 1023525 | 2.27E-21  | 0.78 |
| 30147 | 1026757 | 1027074 | 5.77E-45  | 0.91 |
| 30147 | 1027363 | 1027653 | 1.11E-34  | 0.9  |
| 30147 | 1035919 | 1036268 | 2.97E-21  | 0.75 |
| 30147 | 1037075 | 1037600 | 2.14E-18  | 0.78 |
| 30147 | 1049984 | 1050427 | 1.97E-34  | 0.87 |
| 30147 | 1057175 | 1057625 | 3.86E-28  | 0.87 |
| 30147 | 1058073 | 1058349 | 9.51E-13  | 0.92 |
| 30147 | 1068116 | 1068318 | 1.22E-05  | 0.95 |
| 30147 | 1088211 | 1089229 | 5.67E-38  | 0.85 |
| 30147 | 1089492 | 1089781 | 3.20E-21  | 0.86 |
| 30147 | 1090006 | 1090596 | 7.24E-28  | 0.8  |
| 30147 | 1098085 | 1098474 | 1.14E-15  | 0.86 |
| 30147 | 1100778 | 1101191 | 3.95E-17  | 0.85 |
| 30147 | 1132283 | 1132767 | 4.39E-39  | 0.89 |
| 30147 | 1133526 | 1133798 | 2.33E-10  | 0.74 |
| 30147 | 1140948 | 1142464 | 1.03E-52  | 0.63 |
| 30147 | 1143101 | 1143740 | 3.25E-22  | 0.85 |
| 30147 | 1145243 | 1145493 | 8.04E-23  | 0.98 |
| 30147 | 1146461 | 1147234 | 2.19E-40  | 0.89 |
| 30147 | 1147759 | 1148420 | 4.16E-52  | 0.94 |
| 30147 | 1149041 | 1149424 | 3.06E-15  | 0.91 |
| 30147 | 1151449 | 1151930 | 7.59E-30  | 0.87 |
| 30147 | 1152660 | 1153251 | 1.07E-15  | 0.8  |
| 30147 | 1191114 | 1191662 | 4.29E-27  | 0.92 |
| 30147 | 1217202 | 1218086 | 4.39E-37  | 0.84 |
| 30147 | 1253431 | 1253668 | 4.94E-21  | 0.82 |
| 30147 | 1264066 | 1264382 | 4.02E-16  | 0.88 |
| 30147 | 1276455 | 1276887 | 6.40E-20  | 0.81 |

|       |         |         |           |      |
|-------|---------|---------|-----------|------|
| 30147 | 1321412 | 1321745 | 7.23E-52  | 0.81 |
| 30147 | 1326568 | 1326841 | 3.06E-23  | 0.83 |
| 30147 | 1331582 | 1331972 | 9.10E-11  | 0.82 |
| 30147 | 1331981 | 1332243 | 2.07E-08  | 0.78 |
| 30147 | 1332003 | 1332260 | 8.18E-08  | 0.78 |
| 30147 | 1335516 | 1335945 | 2.14E-41  | 0.9  |
| 30147 | 1339267 | 1339818 | 1.86E-39  | 0.91 |
| 30147 | 1345719 | 1346125 | 6.65E-45  | 0.71 |
| 30147 | 1351047 | 1351364 | 1.30E-28  | 0.83 |
| 30147 | 1351702 | 1351902 | 1.81E-14  | 0.93 |
| 30147 | 1353148 | 1353586 | 1.82E-32  | 0.94 |
| 30147 | 1353890 | 1355226 | 5.29E-51  | 0.82 |
| 30147 | 1360772 | 1361182 | 5.44E-44  | 0.63 |
| 30147 | 1365279 | 1365639 | 6.91E-13  | 0.82 |
| 30147 | 1368325 | 1368905 | 1.50E-23  | 0.8  |
| 30147 | 1379287 | 1379811 | 2.20E-16  | 0.94 |
| 30147 | 1421832 | 1422389 | 2.35E-34  | 0.79 |
| 30147 | 1426559 | 1426769 | 2.94E-31  | 0.77 |
| 30147 | 1447930 | 1448483 | 3.95E-63  | 0.8  |
| 30147 | 1461829 | 1463327 | 2.51E-157 | 0.86 |
| 30147 | 1463587 | 1464972 | 8.10E-174 | 0.92 |
| 30147 | 1478261 | 1478510 | 1.96E-20  | 0.75 |
| 30147 | 1479499 | 1480099 | 4.19E-43  | 0.79 |
| 30147 | 1482079 | 1482855 | 8.30E-42  | 0.91 |
| 30147 | 1483920 | 1484131 | 4.79E-18  | 0.9  |
| 30147 | 1486555 | 1486898 | 1.54E-16  | 0.84 |
| 30147 | 1497822 | 1498390 | 1.57E-29  | 0.88 |
| 30147 | 1512104 | 1513141 | 3.99E-40  | 0.8  |
| 30147 | 1517225 | 1517618 | 1.18E-11  | 0.79 |
| 30147 | 1521374 | 1522442 | 4.06E-26  | 0.74 |
| 30147 | 1555209 | 1555837 | 2.13E-23  | 0.68 |
| 30147 | 1566935 | 1567746 | 1.95E-11  | 0.8  |
| 30147 | 1572727 | 1574957 | 4.47E-72  | 0.72 |
| 30147 | 1581206 | 1581627 | 1.86E-16  | 0.75 |
| 30147 | 1582387 | 1582912 | 4.26E-27  | 0.79 |
| 30147 | 1600654 | 1601310 | 1.48E-25  | 0.79 |
| 30147 | 1616902 | 1617295 | 2.92E-19  | 0.79 |
| 30147 | 1641141 | 1641575 | 9.49E-19  | 0.66 |
| 30147 | 1641936 | 1642783 | 4.68E-62  | 0.89 |
| 30147 | 1643904 | 1644915 | 7.98E-26  | 0.72 |
| 30147 | 1707239 | 1707965 | 8.61E-15  | 0.64 |
| 30147 | 1711779 | 1711999 | 2.17E-18  | 0.77 |
| 30147 | 1712302 | 1713150 | 1.87E-88  | 0.95 |
| 30147 | 1713839 | 1714095 | 5.58E-20  | 0.68 |
| 30147 | 1716195 | 1716725 | 4.54E-46  | 0.93 |
| 30147 | 1732216 | 1732512 | 9.33E-18  | 0.76 |
| 30147 | 1783574 | 1783899 | 1.32E-20  | 0.87 |
| 30147 | 1798257 | 1798563 | 1.47E-26  | 0.84 |
| 30147 | 1798799 | 1802457 | 1.75E-148 | 0.81 |
| 30147 | 1825386 | 1825874 | 1.64E-20  | 0.78 |
| 30147 | 1826245 | 1826629 | 1.78E-16  | 0.78 |
| 30147 | 1836523 | 1837123 | 4.06E-36  | 0.75 |
| 30147 | 1843067 | 1843465 | 2.05E-10  | 0.8  |

|       |         |         |          |      |
|-------|---------|---------|----------|------|
| 30147 | 1848142 | 1848518 | 1.33E-23 | 0.7  |
| 30147 | 1861032 | 1861861 | 1.50E-40 | 0.85 |
| 30147 | 1872513 | 1872948 | 2.54E-22 | 0.95 |
| 30147 | 1873231 | 1874565 | 1.29E-86 | 0.87 |
| 30147 | 1914883 | 1915326 | 2.31E-16 | 0.83 |
| 30147 | 1949088 | 1950306 | 2.17E-54 | 0.78 |
| 30147 | 1973707 | 1974051 | 2.81E-14 | 0.82 |
| 30147 | 2005892 | 2006176 | 1.31E-09 | 0.81 |
| 30147 | 2020913 | 2021534 | 9.83E-11 | 0.62 |
| 30147 | 2049821 | 2050745 | 5.47E-43 | 0.81 |
| 30147 | 2074151 | 2074831 | 6.01E-59 | 0.91 |
| 30147 | 2075434 | 2075792 | 1.90E-56 | 0.95 |
| 30147 | 2105947 | 2106505 | 2.19E-39 | 0.94 |
| 30147 | 2107302 | 2107554 | 4.93E-23 | 0.86 |
| 30147 | 2108016 | 2108677 | 1.58E-09 | 0.82 |
| 30147 | 2118164 | 2118686 | 5.39E-29 | 0.77 |
| 30147 | 2127766 | 2128070 | 3.56E-23 | 0.84 |
| 30147 | 2168295 | 2168633 | 1.06E-35 | 0.93 |
| 30147 | 2170206 | 2171157 | 7.46E-38 | 0.89 |
| 30147 | 2191012 | 2192370 | 1.51E-94 | 0.78 |
| 30147 | 2209207 | 2209838 | 1.73E-40 | 0.84 |
| 30147 | 2229236 | 2230362 | 1.40E-74 | 0.68 |
| 30147 | 2238644 | 2239079 | 1.20E-29 | 0.77 |
| 30147 | 2254609 | 2255486 | 1.16E-94 | 0.89 |
| 30147 | 2256717 | 2257901 | 3.43E-39 | 0.65 |
| 30147 | 2264569 | 2265166 | 2.23E-29 | 0.76 |
| 30147 | 2278694 | 2279019 | 2.79E-22 | 0.65 |
| 30147 | 2282564 | 2286244 | 0.00E+00 | 0.81 |
| 30147 | 2293573 | 2293815 | 1.02E-18 | 0.71 |
| 30147 | 2298783 | 2299075 | 3.75E-17 | 0.8  |
| 30147 | 2298791 | 2299099 | 5.45E-17 | 0.79 |
| 30147 | 2324084 | 2325639 | 7.14E-35 | 0.73 |
| 30147 | 2341986 | 2342294 | 2.05E-11 | 0.9  |
| 30147 | 2342548 | 2342985 | 6.73E-18 | 0.87 |
| 30147 | 2352097 | 2352469 | 7.85E-16 | 0.85 |
| 30147 | 2378201 | 2379465 | 2.92E-31 | 0.67 |
| 30147 | 2379691 | 2380279 | 5.40E-51 | 0.87 |
| 30147 | 2402166 | 2402676 | 2.30E-21 | 0.76 |
| 30147 | 2402893 | 2404450 | 1.52E-44 | 0.65 |
| 30147 | 2416684 | 2417081 | 6.58E-25 | 0.88 |
| 30147 | 2417315 | 2417541 | 3.96E-22 | 0.87 |
| 30147 | 2418539 | 2419264 | 1.65E-30 | 0.85 |
| 30147 | 2425318 | 2425598 | 2.72E-21 | 0.89 |
| 30147 | 2427375 | 2427976 | 2.12E-27 | 0.8  |
| 30147 | 2435475 | 2436754 | 2.13E-75 | 0.87 |
| 30147 | 2437183 | 2437416 | 6.21E-18 | 0.6  |
| 30147 | 2444314 | 2445128 | 3.95E-29 | 0.79 |
| 30147 | 2445355 | 2445971 | 2.07E-64 | 0.92 |
| 30147 | 2447616 | 2448426 | 1.69E-38 | 0.9  |
| 30147 | 2449504 | 2449784 | 6.63E-15 | 0.89 |
| 30147 | 2451319 | 2451724 | 5.68E-22 | 0.68 |
| 30147 | 2461629 | 2462783 | 2.27E-87 | 0.65 |
| 30147 | 2470174 | 2470952 | 2.07E-62 | 0.92 |



|       |         |         |           |      |
|-------|---------|---------|-----------|------|
| 30147 | 2474366 | 2475481 | 2.43E-33  | 0.8  |
| 30147 | 2476208 | 2477054 | 1.27E-48  | 0.68 |
| 30147 | 2480062 | 2480752 | 2.75E-61  | 0.93 |
| 30147 | 2509407 | 2509735 | 1.27E-28  | 0.88 |
| 30147 | 2513183 | 2513510 | 2.21E-10  | 0.79 |
| 30147 | 2524094 | 2524623 | 1.32E-58  | 0.89 |
| 30147 | 2567532 | 2567812 | 2.55E-18  | 0.85 |
| 30147 | 2580028 | 2580910 | 7.65E-45  | 0.78 |
| 30147 | 2581920 | 2582294 | 5.56E-17  | 0.76 |
| 30147 | 2628072 | 2628487 | 3.33E-35  | 0.9  |
| 30147 | 2646843 | 2647566 | 6.65E-57  | 0.85 |
| 30147 | 2647770 | 2649067 | 1.41E-55  | 0.79 |
| 30147 | 2649648 | 2649852 | 1.33E-14  | 0.85 |
| 30147 | 2657239 | 2657650 | 4.10E-43  | 0.86 |
| 30147 | 2661735 | 2662150 | 4.81E-37  | 0.81 |
| 30147 | 2668543 | 2671467 | 2.54E-148 | 0.88 |
| 30147 | 2707214 | 2707462 | 4.11E-09  | 0.77 |
| 30147 | 2714810 | 2715208 | 6.02E-28  | 0.96 |
| 30147 | 2721279 | 2721913 | 1.32E-24  | 0.84 |
| 30147 | 2731878 | 2733084 | 1.18E-35  | 0.81 |
| 30147 | 2745233 | 2745877 | 9.98E-43  | 0.84 |
| 30147 | 2746159 | 2746617 | 1.92E-25  | 0.86 |
| 30147 | 2747238 | 2750024 | 4.69E-139 | 0.9  |
| 30147 | 2757575 | 2759040 | 1.44E-42  | 0.82 |
| 30147 | 2759624 | 2760305 | 1.23E-21  | 0.72 |
| 30147 | 2765575 | 2766784 | 7.30E-64  | 0.83 |
| 30147 | 2776227 | 2777394 | 1.37E-98  | 0.72 |
| 30147 | 2778437 | 2779045 | 9.28E-26  | 0.85 |
| 30147 | 2781616 | 2782156 | 1.77E-29  | 0.68 |
| 30147 | 2782359 | 2783149 | 1.65E-36  | 0.88 |
| 30147 | 2784257 | 2785068 | 6.18E-35  | 0.6  |
| 30147 | 2790656 | 2792965 | 1.07E-72  | 0.81 |
| 30147 | 2834946 | 2835758 | 1.58E-75  | 0.76 |
| 30147 | 2835979 | 2836474 | 6.08E-41  | 0.84 |
| 30147 | 2866070 | 2866768 | 3.96E-23  | 0.75 |
| 30147 | 2868733 | 2869097 | 5.20E-62  | 0.85 |
| 30147 | 2877076 | 2877581 | 3.88E-22  | 0.84 |
| 30147 | 2880879 | 2881636 | 8.07E-28  | 0.77 |
| 30147 | 2891687 | 2892650 | 2.86E-26  | 0.75 |
| 30147 | 2937746 | 2938053 | 2.45E-10  | 0.74 |
| 30147 | 2946497 | 2948134 | 2.28E-99  | 0.86 |
| 30147 | 2948358 | 2949580 | 4.24E-115 | 0.88 |
| 30147 | 2974441 | 2975084 | 5.08E-29  | 0.88 |
| 30147 | 3012810 | 3013545 | 1.15E-27  | 0.83 |
| 30147 | 3049973 | 3050333 | 1.65E-24  | 0.81 |
| 30147 | 3050159 | 3050476 | 9.60E-19  | 0.81 |
| 30147 | 3098777 | 3099519 | 1.34E-35  | 0.73 |
| 30147 | 3100956 | 3102237 | 1.68E-137 | 0.92 |
| 30147 | 3139594 | 3140107 | 1.17E-23  | 0.77 |
| 30147 | 3179063 | 3180105 | 2.99E-57  | 0.85 |
| 30147 | 3187247 | 3187516 | 2.37E-54  | 0.88 |
| 30147 | 3195608 | 3196036 | 1.29E-17  | 0.77 |
| 30147 | 3201135 | 3201557 | 1.28E-13  | 0.66 |

|       |         |         |           |      |
|-------|---------|---------|-----------|------|
| 30147 | 3216475 | 3216921 | 7.95E-21  | 0.93 |
| 30147 | 3217282 | 3217602 | 3.22E-108 | 0.94 |
| 30147 | 3237358 | 3237867 | 3.48E-34  | 0.68 |
| 30147 | 3252409 | 3253804 | 1.47E-117 | 0.78 |
| 30147 | 3282783 | 3283280 | 1.75E-18  | 0.74 |
| 30147 | 3290584 | 3290974 | 2.11E-24  | 0.95 |
| 30147 | 3314400 | 3314837 | 1.08E-23  | 0.79 |
| 30147 | 3314493 | 3314894 | 1.20E-23  | 0.81 |
| 30147 | 3319943 | 3320467 | 1.10E-26  | 0.79 |
| 30147 | 3334676 | 3335027 | 4.32E-18  | 0.79 |
| 30147 | 3336431 | 3337587 | 9.52E-30  | 0.66 |
| 30147 | 3338752 | 3339713 | 3.35E-20  | 0.82 |
| 30147 | 3341715 | 3342504 | 1.29E-128 | 0.93 |
| 30147 | 3342799 | 3343501 | 1.84E-23  | 0.81 |
| 30147 | 3353608 | 3354659 | 1.81E-34  | 0.81 |
| 30147 | 3355753 | 3357478 | 7.05E-52  | 0.72 |
| 30147 | 3385070 | 3385361 | 1.02E-18  | 1    |
| 30147 | 3385563 | 3386292 | 4.99E-51  | 0.88 |
| 30147 | 3393292 | 3394098 | 2.21E-62  | 0.88 |
| 30147 | 3418801 | 3419661 | 6.84E-31  | 0.81 |
| 30147 | 3446659 | 3447007 | 8.09E-15  | 0.77 |
| 30147 | 3455728 | 3456278 | 1.42E-14  | 0.81 |
| 30147 | 3464677 | 3465578 | 6.70E-39  | 0.8  |
| 30147 | 3466496 | 3466801 | 6.20E-23  | 0.8  |
| 30147 | 3486911 | 3488588 | 4.94E-84  | 0.83 |
| 30147 | 3524948 | 3525316 | 2.35E-14  | 0.79 |
| 30147 | 3528445 | 3528872 | 2.93E-30  | 0.88 |
| 30147 | 3529479 | 3530195 | 3.82E-18  | 0.76 |
| 30147 | 3535119 | 3535474 | 1.90E-18  | 0.89 |
| 30147 | 3539717 | 3540128 | 4.61E-07  | 0.78 |
| 30147 | 3541924 | 3542626 | 1.17E-21  | 0.84 |
| 30147 | 3552893 | 3554376 | 3.15E-48  | 0.82 |
| 30147 | 3558987 | 3559340 | 2.08E-15  | 0.78 |
| 30147 | 3559958 | 3560440 | 1.23E-19  | 0.71 |
| 30147 | 3583919 | 3584593 | 2.48E-24  | 0.76 |
| 30147 | 3594471 | 3595771 | 3.16E-31  | 0.75 |
| 30147 | 3625424 | 3625988 | 2.40E-17  | 0.69 |
| 30147 | 3626671 | 3627915 | 3.13E-77  | 0.82 |
| 30147 | 3630343 | 3630711 | 3.15E-05  | 0.77 |
| 30147 | 3645661 | 3646117 | 1.89E-16  | 0.77 |
| 30147 | 3646390 | 3646734 | 2.75E-32  | 0.94 |
| 30147 | 3665074 | 3665411 | 1.39E-26  | 0.87 |
| 30147 | 3665859 | 3666579 | 3.91E-36  | 0.86 |
| 30147 | 3666876 | 3667619 | 2.35E-41  | 0.65 |
| 30147 | 3670417 | 3671073 | 1.07E-38  | 0.85 |
| 30147 | 3726993 | 3727413 | 1.38E-10  | 0.69 |
| 30147 | 3760524 | 3762052 | 5.92E-123 | 0.61 |
| 30147 | 3774423 | 3775302 | 3.64E-89  | 0.92 |
| 30147 | 3791764 | 3792762 | 3.80E-36  | 0.83 |
| 30147 | 3806758 | 3807163 | 3.33E-56  | 0.9  |
| 30147 | 3810556 | 3811729 | 3.86E-86  | 0.77 |
| 30147 | 3825296 | 3826226 | 2.70E-79  | 0.92 |
| 30147 | 3826661 | 3827058 | 5.64E-21  | 0.75 |

|       |         |         |           |      |
|-------|---------|---------|-----------|------|
| 30147 | 3833212 | 3833869 | 3.84E-43  | 0.7  |
| 30147 | 3836785 | 3837922 | 2.33E-40  | 0.86 |
| 30147 | 3850018 | 3850297 | 4.74E-31  | 0.92 |
| 30147 | 3853407 | 3853743 | 4.11E-55  | 0.94 |
| 30147 | 3854510 | 3855106 | 1.05E-19  | 0.75 |
| 30147 | 3858264 | 3858501 | 8.41E-12  | 0.76 |
| 30147 | 3860575 | 3861723 | 1.18E-89  | 0.87 |
| 30147 | 3861924 | 3863608 | 1.05E-107 | 0.87 |
| 30147 | 3876522 | 3877192 | 3.31E-32  | 0.73 |
| 30147 | 3894206 | 3894803 | 1.23E-13  | 0.75 |
| 30147 | 3899780 | 3900053 | 9.09E-21  | 0.89 |
| 30147 | 3905569 | 3905870 | 4.57E-62  | 0.77 |
| 30147 | 3907893 | 3908313 | 1.04E-26  | 0.89 |
| 30147 | 3914077 | 3914332 | 6.22E-07  | 0.66 |
| 30147 | 3986826 | 3988013 | 1.23E-41  | 0.82 |
| 30147 | 3991937 | 3992660 | 1.62E-39  | 0.9  |
| 30147 | 4011550 | 4012084 | 6.69E-41  | 0.9  |
| 30147 | 4039993 | 4040567 | 2.13E-18  | 0.75 |
| 30147 | 4040961 | 4043072 | 1.91E-153 | 0.82 |
| 30147 | 4066273 | 4067314 | 7.48E-41  | 0.88 |
| 30147 | 4067588 | 4067952 | 2.18E-34  | 0.92 |
| 30147 | 4075681 | 4075951 | 3.60E-10  | 0.79 |
| 30147 | 4075867 | 4076141 | 5.54E-14  | 0.79 |
| 30147 | 4088451 | 4089121 | 1.40E-12  | 0.67 |
| 30147 | 4097694 | 4099044 | 5.20E-50  | 0.75 |
| 30147 | 4106830 | 4107073 | 6.41E-26  | 0.9  |
| 30147 | 4107750 | 4108207 | 6.77E-37  | 0.89 |
| 30147 | 4110215 | 4111094 | 2.10E-53  | 0.89 |
| 30147 | 4111397 | 4112580 | 2.08E-50  | 0.88 |
| 30147 | 4115250 | 4115891 | 1.85E-60  | 0.92 |
| 30147 | 4116757 | 4117052 | 1.07E-36  | 0.87 |
| 30147 | 4122999 | 4123841 | 4.55E-28  | 0.73 |
| 30147 | 4131692 | 4132719 | 1.35E-117 | 0.93 |
| 30147 | 4141831 | 4142371 | 1.09E-26  | 0.75 |
| 30147 | 4150598 | 4152147 | 2.15E-54  | 0.63 |
| 30147 | 4161615 | 4162833 | 5.31E-135 | 0.79 |
| 30147 | 4178735 | 4180132 | 4.37E-87  | 0.9  |
| 30147 | 4186185 | 4187897 | 1.02E-52  | 0.75 |
| 30147 | 4219937 | 4220502 | 1.48E-29  | 0.89 |
| 30147 | 4223585 | 4224019 | 1.38E-12  | 0.78 |
| 30147 | 4237447 | 4238625 | 3.05E-33  | 0.81 |
| 30147 | 4241036 | 4241458 | 2.75E-14  | 0.81 |
| 30147 | 4243419 | 4244931 | 9.05E-87  | 0.88 |
| 30147 | 4245229 | 4245815 | 1.27E-27  | 0.86 |
| 30147 | 4249839 | 4250106 | 1.65E-25  | 0.82 |
| 30147 | 4250620 | 4251180 | 1.94E-43  | 0.86 |
| 30147 | 4281000 | 4281640 | 6.98E-52  | 0.82 |
| 30147 | 4301413 | 4301704 | 9.16E-24  | 0.82 |
| 30147 | 4302491 | 4303632 | 4.07E-78  | 0.87 |
| 30147 | 4365998 | 4366560 | 9.17E-17  | 0.72 |
| 30147 | 4369023 | 4369393 | 1.05E-31  | 0.87 |
| 30147 | 4369609 | 4370413 | 3.55E-34  | 0.73 |
| 30147 | 4374126 | 4374487 | 4.14E-15  | 0.82 |

|       |         |         |           |      |
|-------|---------|---------|-----------|------|
| 30147 | 4379111 | 4379361 | 5.50E-42  | 0.94 |
| 30147 | 4392201 | 4392954 | 5.84E-74  | 0.87 |
| 30147 | 4393557 | 4393934 | 2.57E-48  | 0.95 |
| 30147 | 4394151 | 4394556 | 2.75E-40  | 0.89 |
| 30147 | 4395178 | 4395503 | 9.39E-34  | 0.83 |
| 30147 | 4417290 | 4417537 | 7.15E-11  | 0.85 |
| 30147 | 4461336 | 4461566 | 1.65E-12  | 0.81 |
| 30147 | 4462802 | 4464679 | 2.10E-219 | 0.9  |
| 30147 | 4467050 | 4467636 | 2.96E-30  | 0.81 |
| 30147 | 4479634 | 4480031 | 4.99E-15  | 0.83 |
| 30147 | 4482278 | 4482506 | 1.38E-28  | 0.81 |
| 30147 | 4482975 | 4483469 | 3.10E-14  | 0.7  |
| 30147 | 4493005 | 4493788 | 6.13E-32  | 0.79 |
| 30147 | 4533556 | 4534265 | 1.60E-70  | 0.74 |
| 30147 | 4536206 | 4538091 | 6.04E-296 | 0.78 |
| 30147 | 4558943 | 4560279 | 2.76E-60  | 0.89 |
| 30147 | 4574924 | 4576048 | 7.03E-47  | 0.64 |
| 30147 | 4581546 | 4583140 | 1.14E-58  | 0.67 |
| 30147 | 4620549 | 4621651 | 1.90E-68  | 0.86 |
| 30147 | 4625416 | 4625726 | 2.11E-29  | 0.82 |
| 30147 | 4654604 | 4655566 | 1.37E-45  | 0.83 |
| 30147 | 4662033 | 4662402 | 1.63E-19  | 0.82 |
| 30148 | 4245    | 4587    | 3.64E-15  | 0.85 |
| 30148 | 5066    | 5486    | 3.30E-21  | 0.84 |
| 30148 | 15160   | 15627   | 4.99E-29  | 0.77 |
| 30148 | 25173   | 25484   | 3.48E-27  | 0.89 |
| 30148 | 28615   | 29580   | 6.78E-54  | 0.85 |
| 30148 | 30426   | 30782   | 1.32E-30  | 0.97 |
| 30148 | 33931   | 34912   | 1.47E-29  | 0.65 |
| 30148 | 46294   | 46681   | 9.21E-18  | 0.85 |
| 30148 | 49964   | 50357   | 9.30E-21  | 0.79 |
| 30148 | 55154   | 55636   | 1.38E-25  | 0.84 |
| 30148 | 59668   | 60104   | 1.08E-65  | 0.85 |
| 30148 | 66484   | 66803   | 4.32E-11  | 0.79 |
| 30148 | 70683   | 71924   | 1.81E-62  | 0.82 |
| 30148 | 72297   | 73296   | 5.14E-56  | 0.82 |
| 30148 | 73869   | 74439   | 2.67E-37  | 0.85 |
| 30148 | 75743   | 76246   | 2.37E-37  | 0.68 |
| 30148 | 86629   | 87387   | 2.40E-33  | 0.82 |
| 30148 | 105503  | 105866  | 5.55E-05  | 0.64 |
| 30148 | 113433  | 113867  | 6.03E-26  | 0.89 |
| 30148 | 117078  | 117553  | 1.56E-31  | 0.84 |
| 30148 | 118413  | 119373  | 1.74E-82  | 0.75 |
| 30148 | 119740  | 120327  | 1.07E-25  | 0.86 |
| 30148 | 121465  | 122042  | 2.20E-26  | 0.76 |
| 30148 | 127844  | 128095  | 1.85E-17  | 0.88 |
| 30148 | 131299  | 131743  | 1.08E-33  | 0.86 |
| 30148 | 132045  | 132254  | 3.70E-15  | 0.78 |
| 30148 | 151624  | 151934  | 3.04E-32  | 0.82 |
| 30148 | 175507  | 175983  | 1.41E-14  | 0.9  |
| 30148 | 178599  | 178918  | 3.06E-10  | 0.75 |
| 30148 | 179986  | 180595  | 7.93E-25  | 0.81 |
| 30148 | 233990  | 234836  | 2.04E-53  | 0.61 |

|       |        |        |          |      |
|-------|--------|--------|----------|------|
| 30148 | 254631 | 256864 | 5.32E-71 | 0.83 |
| 30148 | 271492 | 271975 | 3.77E-14 | 0.66 |
| 30148 | 292806 | 293326 | 2.81E-36 | 0.75 |
| 30148 | 293635 | 294201 | 1.20E-17 | 0.7  |
| 30148 | 294495 | 294858 | 5.17E-33 | 0.96 |
| 30148 | 307413 | 307823 | 7.63E-13 | 0.82 |
| 30148 | 315273 | 315494 | 1.72E-22 | 0.78 |
| 30148 | 342360 | 342711 | 1.81E-33 | 0.97 |
| 30148 | 349875 | 350101 | 5.38E-08 | 0.94 |
| 30148 | 351694 | 351995 | 4.35E-14 | 0.77 |
| 30148 | 355334 | 355568 | 7.33E-17 | 1    |
| 30148 | 384480 | 384895 | 5.00E-24 | 0.82 |
| 30148 | 385576 | 386309 | 1.82E-55 | 0.92 |
| 30148 | 396419 | 398039 | 9.83E-91 | 0.89 |
| 30148 | 409122 | 409561 | 1.22E-27 | 0.86 |
| 30148 | 415306 | 416451 | 9.08E-41 | 0.61 |
| 30148 | 419758 | 420163 | 1.61E-29 | 0.76 |
| 30148 | 420447 | 421195 | 9.79E-28 | 0.77 |
| 30148 | 424006 | 424742 | 1.17E-58 | 0.86 |
| 30148 | 431178 | 431539 | 1.15E-16 | 0.84 |
| 30148 | 483091 | 483391 | 4.15E-22 | 0.78 |
| 30148 | 511555 | 511895 | 1.14E-31 | 0.76 |
| 30148 | 515603 | 515995 | 6.00E-28 | 0.78 |
| 30148 | 516750 | 517274 | 6.93E-25 | 0.85 |
| 30149 | 2162   | 2619   | 5.68E-09 | 0.61 |
| 30149 | 2955   | 3486   | 1.25E-14 | 0.83 |
| 30149 | 3736   | 3999   | 1.06E-43 | 0.97 |
| 30149 | 19355  | 19851  | 4.03E-11 | 1    |
| 30149 | 22555  | 22843  | 2.62E-07 | 0.6  |
| 30149 | 26864  | 27653  | 1.12E-27 | 0.96 |
| 30149 | 58387  | 58658  | 8.71E-05 | 0.82 |
| 30149 | 66391  | 67128  | 6.05E-24 | 0.87 |
| 30149 | 82378  | 83580  | 7.72E-47 | 0.93 |
| 30149 | 97653  | 98113  | 2.39E-30 | 0.88 |
| 30149 | 105001 | 105451 | 2.60E-10 | 0.83 |
| 30149 | 112752 | 113674 | 4.45E-44 | 0.87 |
| 30149 | 116973 | 118059 | 2.62E-64 | 0.93 |
| 30149 | 123388 | 123781 | 2.48E-22 | 0.94 |
| 30149 | 124808 | 125165 | 2.02E-52 | 0.91 |
| 30149 | 125610 | 126170 | 1.85E-47 | 0.91 |
| 30149 | 177009 | 178164 | 8.26E-43 | 0.95 |
| 30149 | 178597 | 179188 | 7.86E-32 | 0.92 |
| 30149 | 180899 | 181684 | 4.15E-54 | 0.68 |
| 30149 | 181623 | 182637 | 1.87E-50 | 0.82 |
| 30149 | 222820 | 223457 | 1.26E-34 | 0.89 |
| 30149 | 224320 | 224827 | 7.77E-28 | 0.9  |
| 30149 | 225072 | 225465 | 7.25E-32 | 0.88 |
| 30149 | 226232 | 227062 | 5.74E-52 | 0.78 |
| 30149 | 232226 | 232791 | 8.51E-31 | 0.83 |
| 30149 | 239886 | 240086 | 1.33E-23 | 0.96 |
| 30149 | 241627 | 242275 | 1.64E-40 | 0.78 |
| 30149 | 253566 | 254075 | 3.86E-55 | 0.94 |
| 30149 | 254345 | 254952 | 6.00E-24 | 0.92 |

|       |        |        |           |      |
|-------|--------|--------|-----------|------|
| 30149 | 281160 | 282026 | 3.63E-83  | 0.97 |
| 30149 | 287110 | 287567 | 9.70E-23  | 0.96 |
| 30149 | 288104 | 288702 | 1.96E-55  | 0.97 |
| 30149 | 289261 | 290960 | 1.68E-83  | 0.84 |
| 30149 | 291233 | 292085 | 3.09E-34  | 0.9  |
| 30149 | 294030 | 294978 | 7.97E-36  | 0.77 |
| 30149 | 295304 | 295828 | 5.41E-24  | 0.85 |
| 30150 | 9697   | 10036  | 2.20E-15  | 0.75 |
| 30150 | 15048  | 15536  | 2.70E-13  | 0.76 |
| 30150 | 56120  | 56732  | 6.04E-23  | 0.87 |
| 30150 | 77402  | 77860  | 5.65E-15  | 0.63 |
| 30150 | 80253  | 80543  | 6.10E-16  | 0.89 |
| 30150 | 84941  | 85460  | 3.13E-17  | 0.87 |
| 30150 | 103371 | 103639 | 4.44E-28  | 0.94 |
| 30150 | 118113 | 119092 | 7.33E-55  | 0.95 |
| 30150 | 147544 | 148184 | 1.73E-28  | 0.67 |
| 30150 | 148401 | 149138 | 3.51E-74  | 0.85 |
| 30150 | 174640 | 175692 | 6.43E-57  | 0.83 |
| 30150 | 182149 | 182613 | 3.75E-38  | 0.71 |
| 30150 | 185500 | 185867 | 8.66E-11  | 0.85 |
| 30150 | 209001 | 209809 | 1.96E-13  | 0.79 |
| 30150 | 217872 | 218222 | 6.72E-26  | 0.87 |
| 30150 | 222089 | 222730 | 3.42E-33  | 0.76 |
| 30150 | 223439 | 223739 | 3.98E-25  | 0.92 |
| 30150 | 225033 | 225476 | 7.36E-32  | 0.83 |
| 30150 | 240766 | 241095 | 8.96E-35  | 0.98 |
| 30150 | 256186 | 256740 | 6.73E-23  | 0.86 |
| 30150 | 256753 | 257181 | 4.63E-14  | 0.89 |
| 30150 | 257925 | 258593 | 4.54E-19  | 0.77 |
| 30150 | 260091 | 260477 | 1.04E-09  | 0.83 |
| 30150 | 266092 | 266536 | 3.21E-46  | 0.9  |
| 30150 | 269072 | 269678 | 2.83E-17  | 0.84 |
| 30150 | 282978 | 283599 | 5.14E-20  | 0.74 |
| 30150 | 285336 | 286107 | 3.09E-38  | 0.83 |
| 30150 | 286628 | 287303 | 9.22E-50  | 0.91 |
| 30150 | 290430 | 290826 | 6.82E-17  | 0.95 |
| 30150 | 293460 | 294146 | 8.81E-78  | 0.88 |
| 30150 | 295939 | 296985 | 1.12E-183 | 0.9  |
| 30150 | 297647 | 297886 | 6.95E-34  | 0.87 |
| 30150 | 317509 | 318108 | 7.53E-46  | 0.79 |
| 30150 | 318444 | 318736 | 1.82E-29  | 0.9  |
| 30150 | 319131 | 319704 | 8.32E-54  | 0.88 |
| 30150 | 327277 | 327626 | 9.94E-31  | 0.91 |
| 30150 | 344822 | 345335 | 2.76E-14  | 0.93 |
| 30150 | 350538 | 351174 | 1.34E-27  | 0.92 |
| 30150 | 384143 | 384563 | 6.97E-31  | 0.95 |
| 30150 | 441325 | 441838 | 6.32E-22  | 0.82 |
| 30150 | 455989 | 456225 | 3.39E-17  | 0.92 |
| 30150 | 457168 | 457564 | 9.90E-16  | 0.79 |
| 30150 | 488466 | 488750 | 7.37E-15  | 0.79 |
| 30150 | 491146 | 491581 | 1.51E-33  | 0.96 |
| 30150 | 493030 | 494211 | 1.61E-34  | 0.69 |
| 30151 | 40680  | 41513  | 7.75E-16  | 0.92 |

|       |         |         |           |      |
|-------|---------|---------|-----------|------|
| 30151 | 65445   | 65695   | 7.58E-17  | 0.84 |
| 30151 | 75051   | 75618   | 9.83E-13  | 0.94 |
| 30151 | 86906   | 87415   | 1.60E-05  | 0.83 |
| 30151 | 107168  | 107439  | 1.21E-08  | 0.91 |
| 30151 | 242368  | 242878  | 8.75E-12  | 0.92 |
| 30151 | 290519  | 290814  | 2.31E-04  | 0.93 |
| 30151 | 474577  | 474969  | 2.07E-10  | 0.82 |
| 30151 | 476600  | 477323  | 4.70E-33  | 0.92 |
| 30152 | 12252   | 12800   | 2.39E-06  | 1    |
| 30152 | 23729   | 24182   | 1.58E-34  | 0.96 |
| 30152 | 24848   | 25292   | 1.16E-28  | 0.96 |
| 30152 | 56824   | 57097   | 3.77E-20  | 0.77 |
| 30152 | 75592   | 75932   | 4.75E-36  | 0.94 |
| 30152 | 104688  | 105102  | 1.18E-05  | 0.22 |
| 30152 | 160371  | 161085  | 1.97E-42  | 0.98 |
| 30152 | 194918  | 195301  | 1.26E-19  | 0.6  |
| 30152 | 196116  | 196530  | 1.80E-38  | 0.9  |
| 30152 | 202969  | 203177  | 1.08E-37  | 0.97 |
| 30152 | 295830  | 296104  | 2.67E-18  | 0.81 |
| 30152 | 313789  | 314033  | 6.83E-11  | 0.8  |
| 30152 | 416703  | 417054  | 6.12E-07  | 0.85 |
| 30152 | 420037  | 420393  | 1.50E-138 | 0.9  |
| 30152 | 498973  | 499494  | 5.26E-29  | 0.76 |
| 30152 | 510204  | 510622  | 5.17E-36  | 0.9  |
| 30152 | 551443  | 551794  | 1.68E-08  | 0.86 |
| 30152 | 599703  | 600049  | 4.24E-60  | 0.92 |
| 30152 | 610979  | 611334  | 2.82E-22  | 0.87 |
| 30152 | 662064  | 662942  | 3.79E-68  | 0.91 |
| 30152 | 682173  | 682696  | 7.93E-24  | 0.85 |
| 30152 | 683627  | 683882  | 1.21E-09  | 0.74 |
| 30152 | 701315  | 701833  | 8.61E-67  | 0.93 |
| 30152 | 703111  | 703582  | 1.58E-26  | 0.97 |
| 30152 | 718241  | 718686  | 7.04E-13  | 0.62 |
| 30152 | 787264  | 788046  | 7.85E-65  | 0.93 |
| 30152 | 791347  | 791741  | 1.57E-06  | 0.95 |
| 30152 | 856185  | 856501  | 1.10E-07  | 0.84 |
| 30152 | 874572  | 874856  | 5.30E-12  | 0.72 |
| 30152 | 874968  | 875268  | 2.03E-23  | 0.72 |
| 30152 | 883333  | 883654  | 9.13E-05  | 0.91 |
| 30152 | 905166  | 905627  | 8.08E-38  | 0.96 |
| 30152 | 918252  | 918470  | 1.08E-44  | 0.96 |
| 30152 | 919011  | 919238  | 5.24E-59  | 0.92 |
| 30152 | 919510  | 920180  | 1.47E-44  | 0.93 |
| 30152 | 978857  | 979399  | 2.37E-27  | 0.95 |
| 30152 | 979820  | 980234  | 1.84E-93  | 0.94 |
| 30152 | 1001036 | 1001443 | 1.42E-15  | 0.81 |
| 30152 | 1016652 | 1016952 | 4.05E-12  | 0.75 |
| 30152 | 1147481 | 1147778 | 7.02E-20  | 0.82 |
| 30152 | 1172763 | 1173298 | 2.06E-11  | 0.88 |
| 30152 | 1186809 | 1187166 | 1.88E-30  | 0.94 |
| 30152 | 1208756 | 1209290 | 3.24E-23  | 0.9  |
| 30152 | 1247669 | 1247937 | 8.68E-07  | 0.96 |
| 30152 | 1264163 | 1264710 | 3.61E-81  | 0.73 |

|       |         |         |           |      |
|-------|---------|---------|-----------|------|
| 30152 | 1277565 | 1278300 | 2.46E-53  | 0.78 |
| 30152 | 1287239 | 1288012 | 2.82E-18  | 0.65 |
| 30152 | 1386323 | 1386822 | 4.75E-24  | 0.93 |
| 30152 | 1405339 | 1406112 | 4.08E-30  | 0.73 |
| 30152 | 1409162 | 1409735 | 6.03E-44  | 0.93 |
| 30152 | 1421001 | 1421537 | 2.19E-47  | 0.91 |
| 30152 | 1526640 | 1527444 | 1.20E-138 | 0.92 |
| 30152 | 1532627 | 1533022 | 4.46E-12  | 0.61 |
| 30152 | 1549817 | 1550283 | 1.22E-112 | 0.97 |
| 30152 | 1570060 | 1570496 | 5.59E-05  | 0.8  |
| 30152 | 1582039 | 1582504 | 1.33E-83  | 0.93 |
| 30152 | 1620447 | 1620850 | 1.07E-15  | 0.84 |
| 30152 | 1634411 | 1634855 | 6.17E-65  | 0.96 |
| 30152 | 1655689 | 1656339 | 1.66E-24  | 0.85 |
| 30152 | 1656659 | 1656979 | 4.52E-42  | 0.96 |
| 30152 | 1682635 | 1683203 | 9.35E-38  | 0.92 |
| 30152 | 1710134 | 1710557 | 3.89E-32  | 0.94 |
| 30152 | 1738482 | 1738817 | 8.18E-15  | 0.91 |
| 30152 | 1782166 | 1782597 | 8.79E-34  | 0.95 |
| 30152 | 1783312 | 1784125 | 1.17E-75  | 0.94 |
| 30152 | 1807600 | 1807920 | 4.42E-96  | 0.93 |
| 30152 | 1830503 | 1830899 | 4.11E-40  | 0.96 |
| 30152 | 1860977 | 1862103 | 2.90E-49  | 0.78 |
| 30152 | 1862424 | 1864132 | 1.27E-146 | 0.9  |
| 30152 | 1919896 | 1920529 | 1.05E-35  | 0.94 |
| 30152 | 1957842 | 1958313 | 7.26E-13  | 0.88 |
| 30152 | 1994904 | 1995137 | 7.24E-05  | 0.82 |
| 30152 | 2011112 | 2011479 | 1.28E-17  | 0.8  |
| 30152 | 2024421 | 2024762 | 2.53E-06  | 0.86 |
| 30152 | 2027518 | 2027747 | 1.24E-05  | 0.8  |
| 30152 | 2027552 | 2027752 | 4.50E-07  | 0.85 |
| 30152 | 2078434 | 2078686 | 1.72E-05  | 0.83 |
| 30152 | 2078781 | 2079021 | 3.23E-07  | 0.85 |
| 30152 | 2088349 | 2088571 | 7.70E-15  | 0.87 |
| 30152 | 2090711 | 2091380 | 1.54E-13  | 0.96 |
| 30152 | 2118765 | 2119155 | 4.33E-04  | 0.83 |
| 30152 | 2160859 | 2161072 | 5.97E-05  | 0.97 |
| 30152 | 2190127 | 2190508 | 3.42E-08  | 0.77 |
| 30152 | 2293456 | 2293798 | 2.36E-05  | 0.84 |
| 30152 | 2319818 | 2320139 | 5.83E-07  | 0.82 |
| 30152 | 2347206 | 2347489 | 1.88E-07  | 0.78 |
| 30152 | 2367619 | 2367971 | 5.01E-07  | 0.8  |
| 30152 | 2417311 | 2417653 | 2.08E-09  | 0.87 |
| 30152 | 2420297 | 2420523 | 2.38E-05  | 0.84 |
| 30153 | 19226   | 19726   | 1.11E-27  | 0.79 |
| 30153 | 106737  | 107027  | 6.11E-18  | 0.77 |
| 30153 | 112666  | 112986  | 4.42E-14  | 0.92 |
| 30153 | 113665  | 114218  | 4.58E-30  | 0.82 |
| 30153 | 200729  | 202127  | 2.66E-36  | 0.61 |
| 30153 | 210121  | 210363  | 4.16E-04  | 0.82 |
| 30153 | 212009  | 212275  | 1.52E-10  | 0.94 |
| 30153 | 236691  | 237162  | 1.09E-37  | 0.94 |
| 30153 | 260524  | 260963  | 7.01E-17  | 0.95 |



|       |        |        |           |      |
|-------|--------|--------|-----------|------|
| 30153 | 287142 | 287908 | 1.44E-44  | 0.89 |
| 30153 | 291353 | 291918 | 1.20E-14  | 0.78 |
| 30153 | 292680 | 293032 | 2.76E-34  | 0.85 |
| 30153 | 311537 | 312096 | 1.43E-21  | 0.92 |
| 30153 | 333635 | 333937 | 2.18E-11  | 0.85 |
| 30153 | 334169 | 334890 | 4.73E-13  | 0.71 |
| 30153 | 335253 | 335650 | 2.22E-15  | 0.89 |
| 30153 | 336890 | 337296 | 3.31E-36  | 0.84 |
| 30153 | 352160 | 352513 | 1.00E-06  | 0.9  |
| 30153 | 361264 | 361523 | 1.00E-06  | 0.8  |
| 30153 | 362286 | 362580 | 4.74E-05  | 0.95 |
| 30153 | 381496 | 381853 | 5.66E-10  | 0.88 |
| 30153 | 387688 | 388667 | 2.92E-133 | 0.86 |
| 30153 | 390388 | 390638 | 1.32E-13  | 0.86 |
| 30153 | 391518 | 391736 | 2.94E-23  | 0.93 |
| 30153 | 404521 | 405554 | 1.60E-44  | 0.83 |
| 30153 | 488604 | 489333 | 1.03E-08  | 0.83 |
| 30153 | 494933 | 495186 | 2.69E-04  | 0.91 |
| 30153 | 524947 | 525352 | 7.41E-10  | 0.83 |
| 30153 | 567313 | 567664 | 4.78E-10  | 0.94 |
| 30153 | 569113 | 569519 | 3.50E-07  | 0.84 |
| 30153 | 573494 | 573911 | 1.78E-57  | 0.95 |
| 30153 | 578404 | 578715 | 1.64E-23  | 0.86 |
| 30153 | 595770 | 596215 | 1.62E-07  | 0.97 |
| 30153 | 599346 | 599552 | 4.39E-10  | 0.98 |
| 30153 | 689376 | 689876 | 4.86E-07  | 0.93 |
| 30153 | 727107 | 727351 | 1.63E-04  | 1    |
| 30153 | 766650 | 767247 | 3.48E-08  | 0.81 |
| 30154 | 2856   | 4368   | 9.35E-46  | 0.88 |
| 30154 | 110996 | 111295 | 9.95E-24  | 0.93 |
| 30154 | 113411 | 115723 | 2.30E-145 | 0.9  |
| 30154 | 119306 | 119812 | 1.02E-52  | 0.97 |
| 30154 | 124579 | 124928 | 2.69E-26  | 0.86 |
| 30154 | 130322 | 131110 | 6.67E-21  | 0.95 |
| 30154 | 138330 | 138982 | 4.44E-23  | 0.77 |
| 30154 | 202502 | 202960 | 2.07E-07  | 0.89 |
| 30154 | 209868 | 210130 | 1.45E-19  | 0.83 |
| 30154 | 214086 | 214505 | 8.63E-07  | 0.77 |
| 30154 | 223019 | 223515 | 4.46E-22  | 0.87 |
| 30154 | 281454 | 281751 | 7.97E-35  | 0.9  |
| 30154 | 284195 | 284690 | 1.49E-15  | 0.79 |
| 30154 | 299859 | 301171 | 1.44E-119 | 0.94 |
| 30154 | 326524 | 326745 | 8.72E-06  | 0.82 |
| 30154 | 342442 | 343038 | 3.29E-65  | 0.92 |
| 30154 | 344064 | 344781 | 9.57E-31  | 0.93 |
| 30154 | 362710 | 363182 | 1.75E-10  | 0.84 |
| 30154 | 366661 | 367450 | 7.17E-40  | 0.85 |
| 30154 | 469454 | 469694 | 3.68E-14  | 0.75 |
| 30154 | 479006 | 480133 | 2.66E-105 | 0.93 |
| 30154 | 487330 | 487708 | 1.91E-19  | 0.91 |
| 30154 | 491679 | 492030 | 4.24E-12  | 0.81 |
| 30154 | 536209 | 536902 | 8.30E-32  | 0.88 |
| 30154 | 537400 | 537658 | 3.47E-26  | 0.97 |

|       |        |        |          |      |
|-------|--------|--------|----------|------|
| 30154 | 626058 | 626623 | 2.35E-44 | 0.94 |
| 30154 | 693768 | 694604 | 3.62E-36 | 0.8  |
| 30154 | 778208 | 778774 | 2.10E-46 | 0.81 |
| 30154 | 778980 | 779758 | 1.88E-31 | 0.79 |
| 30154 | 787309 | 787574 | 9.48E-14 | 0.92 |
| 30154 | 789138 | 789977 | 3.66E-62 | 0.75 |
| 30154 | 790541 | 790996 | 3.33E-22 | 0.91 |
| 30154 | 809963 | 810189 | 5.53E-06 | 0.82 |
| 30154 | 813719 | 814317 | 2.21E-27 | 0.8  |
| 30154 | 832911 | 833400 | 4.39E-48 | 0.94 |
| 30154 | 834593 | 835169 | 3.53E-52 | 0.95 |
| 30154 | 838384 | 839059 | 4.32E-60 | 0.67 |
| 30154 | 849990 | 850363 | 1.51E-15 | 0.77 |
| 30154 | 857297 | 857716 | 2.15E-28 | 0.84 |
| 30154 | 858883 | 859221 | 1.92E-29 | 0.98 |
| 30154 | 861418 | 861994 | 8.60E-53 | 0.92 |
| 30154 | 878244 | 878624 | 9.84E-14 | 0.83 |
| 30154 | 885028 | 885568 | 3.29E-24 | 0.9  |
| 30154 | 885794 | 886059 | 3.31E-15 | 0.94 |
| 30154 | 890912 | 891251 | 2.04E-17 | 0.75 |
| 30155 | 24461  | 25479  | 4.45E-63 | 0.71 |
| 30155 | 34755  | 35134  | 3.32E-12 | 0.89 |
| 30155 | 93621  | 94168  | 2.75E-25 | 0.93 |
| 30155 | 129393 | 129814 | 3.88E-20 | 0.95 |
| 30155 | 155602 | 155831 | 9.16E-07 | 0.93 |
| 30155 | 161687 | 162011 | 5.47E-16 | 0.89 |
| 30155 | 328939 | 329239 | 1.61E-09 | 0.92 |
| 30155 | 397671 | 398231 | 9.52E-21 | 0.78 |
| 30155 | 409107 | 409924 | 2.25E-54 | 0.94 |
| 30155 | 412208 | 412612 | 6.27E-32 | 0.96 |
| 30155 | 413087 | 413388 | 1.50E-44 | 0.99 |
| 30155 | 414813 | 415079 | 3.99E-38 | 0.95 |
| 30155 | 424998 | 425314 | 1.70E-30 | 0.94 |
| 30155 | 483936 | 485025 | 1.34E-55 | 0.84 |
| 30155 | 485347 | 486566 | 5.52E-59 | 0.83 |
| 30155 | 533002 | 533288 | 1.84E-10 | 0.92 |
| 30155 | 643588 | 643803 | 3.49E-43 | 0.82 |
| 30155 | 668677 | 669154 | 1.03E-39 | 0.93 |
| 30155 | 670811 | 671261 | 9.40E-55 | 0.94 |
| 30155 | 681577 | 682880 | 1.37E-48 | 0.82 |
| 30155 | 730927 | 731256 | 4.83E-40 | 0.89 |
| 30155 | 732476 | 732723 | 1.90E-33 | 0.91 |
| 30155 | 749075 | 749437 | 1.65E-03 | 1    |
| 30155 | 796912 | 797188 | 6.32E-10 | 0.83 |
| 30155 | 808854 | 809628 | 1.68E-34 | 0.79 |
| 30155 | 857007 | 857672 | 1.40E-34 | 0.97 |
| 30155 | 892862 | 893294 | 6.44E-05 | 0.86 |
| 30155 | 896876 | 897110 | 2.53E-04 | 1    |
| 30155 | 907961 | 908430 | 7.12E-31 | 0.83 |
| 30155 | 923209 | 923442 | 1.43E-22 | 0.6  |
| 30155 | 947713 | 948329 | 5.19E-35 | 0.96 |
| 30155 | 965560 | 965843 | 8.07E-09 | 0.91 |
| 30155 | 967379 | 967668 | 2.13E-19 | 0.96 |

|       |         |         |           |      |
|-------|---------|---------|-----------|------|
| 30155 | 968107  | 968705  | 1.17E-34  | 0.95 |
| 30155 | 987577  | 988134  | 7.13E-14  | 0.7  |
| 30155 | 988661  | 989537  | 1.97E-48  | 0.94 |
| 30155 | 1019276 | 1020021 | 1.40E-60  | 0.95 |
| 30155 | 1099494 | 1099739 | 2.64E-13  | 0.95 |
| 30155 | 1195375 | 1195692 | 3.11E-23  | 0.96 |
| 30155 | 1277119 | 1277449 | 1.23E-17  | 0.94 |
| 30155 | 1294242 | 1294565 | 2.08E-06  | 0.87 |
| 30155 | 1347026 | 1347344 | 3.30E-19  | 0.84 |
| 30155 | 1392909 | 1393266 | 3.44E-06  | 0.97 |
| 30155 | 1394081 | 1394343 | 9.54E-05  | 1    |
| 30155 | 1462326 | 1462539 | 1.75E-06  | 0.87 |
| 30156 | 198     | 417     | 5.42E-09  | 0.63 |
| 30156 | 65050   | 65564   | 1.05E-04  | 0.96 |
| 30156 | 75907   | 76980   | 4.06E-14  | 0.6  |
| 30156 | 127068  | 127534  | 1.28E-11  | 0.8  |
| 30156 | 169978  | 170642  | 1.72E-132 | 0.95 |
| 30156 | 198131  | 198551  | 1.89E-21  | 0.85 |
| 30156 | 209861  | 210139  | 1.37E-04  | 0.95 |
| 30156 | 215845  | 216102  | 2.52E-05  | 0.88 |
| 30156 | 239630  | 240092  | 1.09E-20  | 0.79 |
| 30156 | 240325  | 240641  | 3.81E-05  | 0.82 |
| 30156 | 269743  | 269976  | 4.97E-06  | 0.92 |
| 30156 | 273009  | 273490  | 1.47E-03  | 0.86 |
| 30156 | 282870  | 283363  | 6.59E-05  | 0.67 |
| 30156 | 283788  | 284040  | 9.59E-09  | 0.95 |
| 30156 | 323676  | 323934  | 3.15E-10  | 0.93 |
| 30156 | 340887  | 341107  | 2.45E-13  | 0.79 |
| 30156 | 388222  | 389065  | 7.16E-60  | 0.96 |
| 30156 | 432543  | 433413  | 1.53E-37  | 0.81 |
| 30156 | 462908  | 463470  | 4.08E-06  | 1    |
| 30156 | 499663  | 500149  | 3.08E-06  | 0.82 |
| 30156 | 567670  | 568063  | 1.05E-06  | 0.94 |
| 30156 | 589694  | 590093  | 4.65E-05  | 1    |
| 30156 | 618562  | 618816  | 2.70E-13  | 0.81 |
| 30156 | 648949  | 649196  | 8.35E-17  | 0.87 |
| 30156 | 654091  | 654304  | 1.23E-15  | 0.91 |
| 30156 | 664421  | 664811  | 1.93E-06  | 0.9  |
| 30156 | 687351  | 688031  | 1.80E-39  | 0.82 |
| 30156 | 700738  | 701532  | 2.07E-39  | 0.68 |
| 30156 | 702702  | 703276  | 1.92E-33  | 0.83 |
| 30156 | 720894  | 721265  | 2.61E-06  | 1    |
| 30156 | 742396  | 742597  | 1.32E-17  | 1    |
| 30156 | 745546  | 746398  | 9.23E-52  | 0.85 |
| 30156 | 752111  | 752394  | 1.49E-36  | 0.88 |
| 30156 | 752606  | 753503  | 9.19E-25  | 0.71 |
| 30156 | 766526  | 767248  | 5.76E-54  | 0.7  |
| 30156 | 770283  | 771161  | 1.10E-33  | 0.78 |
| 30156 | 793010  | 793270  | 3.03E-30  | 0.94 |
| 30156 | 823821  | 824047  | 6.19E-12  | 0.79 |
| 30156 | 836579  | 837504  | 8.62E-34  | 0.67 |
| 30156 | 853737  | 853952  | 8.61E-06  | 0.83 |
| 30156 | 943333  | 943615  | 2.06E-23  | 0.97 |

|       |         |         |           |      |
|-------|---------|---------|-----------|------|
| 30156 | 963418  | 963773  | 2.29E-24  | 0.73 |
| 30156 | 967892  | 969931  | 1.21E-159 | 0.94 |
| 30156 | 1013306 | 1014019 | 1.46E-43  | 0.83 |
| 30156 | 1021856 | 1022295 | 9.10E-32  | 0.91 |
| 30156 | 1025354 | 1025750 | 1.45E-12  | 0.8  |
| 30156 | 1026760 | 1027421 | 3.09E-22  | 0.82 |
| 30156 | 1027707 | 1027913 | 1.32E-39  | 0.85 |
| 30156 | 1161518 | 1161869 | 1.37E-54  | 0.92 |
| 30156 | 1162784 | 1163491 | 1.48E-26  | 0.75 |
| 30156 | 1204996 | 1205644 | 2.49E-30  | 0.91 |
| 30156 | 1208124 | 1208920 | 1.07E-50  | 0.94 |
| 30156 | 1218041 | 1218793 | 5.34E-44  | 0.93 |
| 30156 | 1239640 | 1240121 | 2.08E-47  | 0.93 |
| 30156 | 1242133 | 1243262 | 5.17E-105 | 0.96 |
| 30156 | 1246507 | 1246897 | 1.71E-49  | 0.8  |
| 30156 | 1247171 | 1247983 | 5.59E-32  | 0.84 |
| 30156 | 1251038 | 1251274 | 9.23E-31  | 0.96 |
| 30156 | 1252590 | 1252940 | 1.26E-32  | 0.8  |
| 30156 | 1297175 | 1297424 | 1.45E-21  | 0.81 |
| 30156 | 1297974 | 1298252 | 5.83E-24  | 0.91 |
| 30156 | 1316450 | 1316738 | 1.90E-19  | 0.95 |
| 30156 | 1318434 | 1318724 | 3.12E-16  | 0.68 |
| 30156 | 1359475 | 1360931 | 1.14E-77  | 0.9  |
| 30156 | 1368528 | 1368839 | 1.82E-10  | 0.94 |
| 30156 | 1378045 | 1378248 | 2.04E-22  | 0.84 |
| 30156 | 1378598 | 1378829 | 1.75E-22  | 0.9  |
| 30156 | 1389722 | 1390656 | 6.34E-44  | 0.65 |
| 30156 | 1392831 | 1393677 | 5.50E-39  | 0.94 |
| 30156 | 1413276 | 1413771 | 8.18E-26  | 0.89 |
| 30156 | 1414058 | 1414361 | 8.00E-54  | 0.95 |
| 30156 | 1414574 | 1416163 | 7.90E-109 | 0.89 |
| 30156 | 1418712 | 1419087 | 1.11E-31  | 0.98 |
| 30156 | 1443428 | 1443831 | 1.87E-15  | 0.79 |
| 30156 | 1448882 | 1449416 | 8.57E-22  | 0.91 |
| 30156 | 1449903 | 1450410 | 1.20E-12  | 0.88 |
| 30156 | 1453872 | 1455499 | 8.06E-60  | 0.89 |
| 30156 | 1476664 | 1476876 | 1.41E-06  | 0.77 |
| 30156 | 1491792 | 1492320 | 4.09E-14  | 0.71 |
| 30156 | 1492017 | 1492465 | 1.04E-09  | 0.83 |
| 30157 | 4402    | 4662    | 1.16E-07  | 0.76 |
| 30157 | 11463   | 11960   | 1.34E-11  | 0.76 |
| 30157 | 59607   | 60231   | 2.56E-59  | 0.92 |
| 30157 | 78615   | 79097   | 7.25E-13  | 0.81 |
| 30157 | 79466   | 80068   | 5.04E-41  | 0.94 |
| 30157 | 88920   | 89743   | 4.03E-25  | 0.84 |
| 30157 | 91347   | 91555   | 2.62E-21  | 0.85 |
| 30157 | 97509   | 99189   | 7.27E-103 | 0.93 |
| 30157 | 115355  | 116094  | 2.55E-59  | 0.86 |
| 30157 | 149921  | 150369  | 9.60E-15  | 0.96 |
| 30157 | 151140  | 151525  | 2.63E-11  | 0.79 |
| 30157 | 156397  | 156773  | 1.65E-12  | 0.68 |
| 30157 | 157616  | 158055  | 3.26E-27  | 0.84 |
| 30157 | 166968  | 167351  | 4.52E-10  | 0.83 |

|       |        |        |          |      |
|-------|--------|--------|----------|------|
| 30157 | 170450 | 170712 | 3.09E-23 | 0.83 |
| 30157 | 187373 | 188370 | 1.69E-79 | 0.9  |
| 30157 | 188591 | 188841 | 9.18E-27 | 0.94 |
| 30157 | 191202 | 191518 | 4.36E-22 | 0.65 |
| 30157 | 195006 | 196373 | 4.26E-79 | 0.84 |
| 30157 | 211588 | 212107 | 6.92E-34 | 0.9  |
| 30157 | 213908 | 214246 | 1.87E-28 | 0.97 |
| 30157 | 232740 | 233111 | 8.75E-52 | 0.76 |
| 30157 | 235085 | 235957 | 4.98E-48 | 0.93 |
| 30157 | 237201 | 237670 | 7.81E-12 | 0.82 |
| 30157 | 244582 | 244819 | 1.63E-22 | 0.9  |
| 30157 | 246474 | 247284 | 7.10E-41 | 0.92 |
| 30157 | 281297 | 281525 | 7.74E-10 | 0.9  |
| 30157 | 283703 | 284198 | 1.89E-25 | 0.8  |
| 30157 | 327290 | 327576 | 7.14E-07 | 0.94 |
| 30157 | 348069 | 349546 | 2.01E-64 | 0.75 |
| 30157 | 356231 | 357039 | 1.02E-31 | 0.88 |
| 30157 | 409786 | 410281 | 4.16E-14 | 0.93 |
| 30157 | 487626 | 487965 | 6.88E-06 | 0.84 |
| 30157 | 491353 | 492058 | 1.66E-26 | 0.9  |
| 30157 | 500064 | 500514 | 1.02E-06 | 0.77 |
| 30157 | 500576 | 500929 | 1.82E-08 | 0.97 |
| 30157 | 517575 | 517994 | 1.48E-08 | 0.88 |
| 30157 | 543264 | 543624 | 1.55E-31 | 0.76 |
| 30157 | 544682 | 545531 | 1.70E-66 | 0.92 |
| 30157 | 546503 | 547098 | 2.25E-45 | 0.9  |
| 30157 | 547772 | 548352 | 4.98E-95 | 0.87 |
| 30157 | 564105 | 564541 | 3.72E-08 | 0.84 |
| 30157 | 632205 | 632518 | 1.28E-42 | 0.77 |
| 30157 | 635093 | 635564 | 2.95E-21 | 0.9  |
| 30157 | 647192 | 647523 | 7.15E-07 | 0.9  |
| 30157 | 655461 | 655862 | 5.36E-07 | 0.97 |
| 30157 | 656389 | 656684 | 4.54E-06 | 0.76 |
| 30157 | 663587 | 664203 | 2.89E-04 | 0.92 |
| 30157 | 664479 | 665020 | 5.64E-07 | 0.88 |
| 30157 | 701236 | 701500 | 2.41E-04 | 0.88 |
| 30158 | 8735   | 9012   | 1.83E-38 | 0.64 |
| 30158 | 13829  | 14783  | 1.22E-72 | 0.94 |
| 30158 | 17664  | 18192  | 1.08E-35 | 0.91 |
| 30158 | 76484  | 76939  | 3.81E-37 | 0.93 |
| 30158 | 78901  | 79280  | 2.09E-37 | 0.82 |
| 30158 | 80833  | 81205  | 1.12E-25 | 0.94 |
| 30158 | 81957  | 82474  | 1.34E-25 | 0.93 |
| 30158 | 83737  | 84495  | 1.96E-42 | 0.74 |
| 30158 | 179564 | 179831 | 3.20E-15 | 0.85 |
| 30158 | 181571 | 182140 | 2.66E-20 | 0.9  |
| 30158 | 190612 | 191384 | 8.96E-29 | 0.93 |
| 30158 | 231503 | 232022 | 3.84E-62 | 0.95 |
| 30158 | 237346 | 237759 | 1.50E-25 | 0.81 |
| 30158 | 238029 | 238612 | 1.37E-15 | 0.76 |
| 30158 | 303830 | 304257 | 1.34E-03 | 0.93 |
| 30158 | 399908 | 400145 | 1.10E-03 | 0.73 |
| 30158 | 422572 | 423615 | 9.30E-73 | 0.94 |

|       |        |        |           |      |
|-------|--------|--------|-----------|------|
| 30158 | 427157 | 427801 | 1.17E-32  | 0.95 |
| 30158 | 437937 | 438238 | 1.94E-13  | 0.97 |
| 30158 | 451986 | 452189 | 9.10E-07  | 0.96 |
| 30158 | 461173 | 461574 | 6.27E-29  | 0.91 |
| 30159 | 1920   | 2207   | 6.85E-42  | 0.82 |
| 30159 | 15360  | 15690  | 7.53E-15  | 0.83 |
| 30160 | 44690  | 45002  | 8.16E-07  | 0.97 |
| 30160 | 47961  | 48214  | 2.12E-07  | 0.87 |
| 30160 | 48317  | 48576  | 2.19E-08  | 0.93 |
| 30160 | 63091  | 63606  | 5.86E-08  | 0.81 |
| 30160 | 134374 | 134782 | 6.78E-05  | 0.79 |
| 30160 | 145109 | 145473 | 1.18E-12  | 0.92 |
| 30160 | 201770 | 202153 | 4.07E-11  | 0.84 |
| 30160 | 202469 | 202956 | 1.39E-11  | 0.89 |
| 30160 | 234544 | 234970 | 2.58E-25  | 0.81 |
| 30160 | 269759 | 270990 | 1.56E-67  | 0.96 |
| 30160 | 283028 | 283885 | 3.40E-28  | 0.8  |
| 30160 | 305461 | 306147 | 1.74E-26  | 0.79 |
| 30160 | 329733 | 330647 | 1.50E-119 | 0.71 |
| 30160 | 330848 | 332038 | 8.11E-71  | 0.88 |
| 30161 | 8407   | 8630   | 1.32E-13  | 0.77 |
| 30161 | 10350  | 10818  | 1.56E-28  | 0.82 |
| 30161 | 18690  | 19239  | 8.90E-16  | 0.71 |
| 30161 | 52883  | 53346  | 1.69E-08  | 0.62 |
| 30161 | 56425  | 56698  | 7.12E-21  | 0.91 |
| 30161 | 68806  | 69088  | 4.58E-12  | 0.79 |
| 30162 | 15536  | 15790  | 4.38E-17  | 0.83 |
| 30162 | 17317  | 18285  | 4.66E-34  | 0.72 |
| 30162 | 62458  | 65319  | 1.56E-87  | 0.78 |
| 30162 | 94487  | 94704  | 3.11E-08  | 0.73 |
| 30162 | 95019  | 95247  | 3.10E-13  | 0.84 |
| 30162 | 97277  | 97497  | 3.53E-12  | 0.86 |
| 30162 | 124387 | 124924 | 1.81E-05  | 0.88 |
| 30162 | 126898 | 127200 | 7.32E-03  | 0.7  |
| 30162 | 127710 | 128185 | 5.82E-11  | 0.86 |
| 30162 | 215887 | 216191 | 4.37E-12  | 0.91 |
| 30162 | 268122 | 268965 | 2.12E-34  | 0.75 |
| 30162 | 370826 | 371862 | 1.84E-30  | 0.84 |
| 30162 | 396909 | 397296 | 1.55E-19  | 0.94 |
| 30162 | 538441 | 539107 | 7.33E-47  | 0.76 |
| 30162 | 552197 | 552711 | 4.76E-05  | 0.89 |
| 30162 | 615142 | 615546 | 9.15E-11  | 0.83 |
| 30162 | 632650 | 634054 | 2.38E-76  | 0.92 |
| 30162 | 634344 | 634806 | 1.77E-21  | 0.88 |
| 30162 | 636122 | 636547 | 5.32E-27  | 0.97 |
| 30162 | 639109 | 639803 | 1.05E-37  | 0.88 |
| 30162 | 641093 | 641589 | 5.59E-38  | 0.9  |
| 30162 | 644616 | 644932 | 1.43E-08  | 0.8  |
| 30162 | 664490 | 665594 | 1.31E-43  | 0.76 |
| 30162 | 803304 | 803653 | 3.34E-09  | 0.79 |
| 30162 | 804199 | 804471 | 8.48E-19  | 0.91 |
| 30162 | 804720 | 805501 | 2.64E-44  | 0.93 |
| 30162 | 805781 | 806122 | 3.72E-39  | 0.92 |

|       |         |         |           |      |
|-------|---------|---------|-----------|------|
| 30162 | 806378  | 806890  | 3.63E-70  | 0.83 |
| 30162 | 807452  | 807996  | 1.35E-35  | 0.92 |
| 30162 | 810044  | 810879  | 4.76E-42  | 0.91 |
| 30162 | 821075  | 821422  | 2.35E-20  | 0.93 |
| 30162 | 826568  | 826913  | 2.99E-15  | 0.8  |
| 30162 | 846997  | 847197  | 4.90E-13  | 0.84 |
| 30162 | 865129  | 865715  | 2.11E-25  | 0.78 |
| 30162 | 872597  | 873013  | 3.31E-35  | 0.96 |
| 30162 | 876801  | 877080  | 3.88E-18  | 0.84 |
| 30162 | 885526  | 886050  | 1.08E-14  | 0.86 |
| 30162 | 914412  | 914920  | 8.59E-28  | 0.89 |
| 30162 | 928136  | 928710  | 4.39E-25  | 0.91 |
| 30162 | 938397  | 938672  | 4.41E-09  | 0.86 |
| 30162 | 963752  | 964274  | 1.52E-33  | 0.86 |
| 30162 | 986217  | 986672  | 1.80E-37  | 0.88 |
| 30162 | 1003572 | 1004117 | 5.24E-11  | 0.78 |
| 30162 | 1064305 | 1064603 | 2.23E-03  | 0.92 |
| 30162 | 1076373 | 1078558 | 1.08E-112 | 0.83 |
| 30162 | 1079219 | 1079766 | 1.06E-23  | 0.81 |
| 30162 | 1081082 | 1081703 | 3.97E-43  | 0.94 |
| 30162 | 1081967 | 1082532 | 2.86E-16  | 0.79 |
| 30162 | 1083643 | 1084460 | 6.02E-47  | 0.93 |
| 30162 | 1117393 | 1117682 | 1.52E-43  | 0.94 |
| 30162 | 1118206 | 1118560 | 1.76E-09  | 0.93 |
| 30162 | 1138163 | 1138385 | 3.12E-53  | 0.74 |
| 30162 | 1138653 | 1139130 | 1.49E-39  | 0.85 |
| 30162 | 1139497 | 1139756 | 8.14E-57  | 0.97 |
| 30162 | 1144838 | 1145105 | 1.12E-10  | 0.76 |
| 30162 | 1145077 | 1145363 | 3.24E-20  | 0.74 |
| 30162 | 1195647 | 1196135 | 7.61E-51  | 0.82 |
| 30162 | 1200134 | 1201840 | 1.16E-117 | 0.83 |
| 30162 | 1256538 | 1256836 | 2.58E-39  | 0.96 |
| 30162 | 1264367 | 1264756 | 4.29E-07  | 0.94 |
| 30162 | 1275831 | 1277177 | 1.40E-86  | 0.85 |
| 30162 | 1278913 | 1279495 | 3.10E-38  | 0.76 |
| 30162 | 1282675 | 1283920 | 2.46E-63  | 0.89 |
| 30162 | 1284749 | 1285363 | 3.06E-27  | 0.79 |
| 30162 | 1286242 | 1286764 | 3.82E-16  | 0.79 |
| 30162 | 1287024 | 1288688 | 5.42E-116 | 0.88 |
| 30162 | 1308093 | 1308297 | 9.31E-11  | 0.91 |
| 30162 | 1344748 | 1344993 | 7.49E-25  | 0.96 |
| 30162 | 1382836 | 1383325 | 2.04E-108 | 0.98 |
| 30162 | 1393078 | 1393354 | 3.63E-29  | 0.96 |
| 30162 | 1395218 | 1395457 | 1.64E-20  | 0.91 |
| 30162 | 1407900 | 1408276 | 8.72E-36  | 0.96 |
| 30162 | 1417994 | 1418762 | 4.92E-96  | 0.94 |
| 30162 | 1440252 | 1440476 | 7.70E-09  | 0.65 |
| 30162 | 1441361 | 1442079 | 3.16E-26  | 0.87 |
| 30162 | 1466960 | 1467306 | 3.22E-32  | 0.94 |
| 30162 | 1468910 | 1469233 | 4.36E-17  | 0.96 |
| 30162 | 1518443 | 1518945 | 3.92E-56  | 0.95 |
| 30162 | 1574978 | 1575408 | 7.63E-24  | 0.85 |
| 30162 | 1575715 | 1576658 | 2.27E-66  | 0.93 |

|       |         |         |           |      |
|-------|---------|---------|-----------|------|
| 30162 | 1580193 | 1580614 | 3.51E-12  | 0.91 |
| 30162 | 1648265 | 1648922 | 3.48E-18  | 0.78 |
| 30162 | 1707504 | 1707853 | 2.51E-20  | 0.99 |
| 30162 | 1715761 | 1716317 | 1.08E-87  | 0.9  |
| 30162 | 1719533 | 1719936 | 2.83E-36  | 0.92 |
| 30162 | 1753863 | 1754306 | 2.06E-28  | 0.92 |
| 30162 | 1774614 | 1775258 | 1.11E-57  | 0.89 |
| 30162 | 1775717 | 1776198 | 6.79E-134 | 0.95 |
| 30162 | 1777389 | 1777855 | 1.27E-30  | 0.95 |
| 30162 | 1779712 | 1781057 | 1.87E-79  | 0.75 |
| 30162 | 1802779 | 1803224 | 2.33E-37  | 0.96 |
| 30165 | 14395   | 14819   | 2.62E-08  | 0.86 |
| 30165 | 81062   | 82045   | 9.41E-44  | 0.9  |
| 30165 | 87183   | 88086   | 1.32E-16  | 0.92 |
| 30165 | 116072  | 116716  | 1.13E-11  | 0.84 |
| 30165 | 117239  | 118373  | 4.08E-28  | 0.92 |
| 30165 | 163293  | 163562  | 3.31E-06  | 0.9  |
| 30165 | 211622  | 212436  | 3.63E-18  | 0.9  |
| 30165 | 224614  | 225252  | 6.54E-21  | 0.85 |
| 30165 | 229854  | 230415  | 5.65E-06  | 0.86 |
| 30165 | 250813  | 251065  | 6.05E-91  | 0.84 |
| 30165 | 251299  | 251737  | 1.00E-16  | 0.79 |
| 30165 | 279017  | 279347  | 3.14E-156 | 0.79 |
| 30165 | 282827  | 283168  | 1.32E-07  | 0.89 |
| 30165 | 284593  | 285139  | 3.47E-16  | 0.91 |
| 30165 | 285448  | 286254  | 5.29E-08  | 0.82 |
| 30165 | 294959  | 295763  | 1.91E-13  | 0.88 |
| 30165 | 296016  | 296426  | 9.59E-07  | 0.8  |
| 30166 | 14045   | 14373   | 5.09E-17  | 0.95 |
| 30166 | 19435   | 19874   | 7.32E-14  | 0.85 |
| 30166 | 48770   | 49148   | 4.18E-20  | 0.99 |
| 30166 | 50825   | 51196   | 2.25E-25  | 0.84 |
| 30166 | 55925   | 56283   | 4.20E-12  | 0.88 |
| 30166 | 58687   | 59278   | 5.64E-05  | 0.87 |
| 30166 | 77967   | 78254   | 6.80E-05  | 1    |
| 30166 | 85706   | 86258   | 3.20E-31  | 0.81 |
| 30166 | 90940   | 91473   | 2.32E-20  | 0.82 |
| 30166 | 93704   | 94390   | 9.69E-23  | 0.82 |
| 30166 | 97930   | 98236   | 3.48E-22  | 0.79 |
| 30166 | 99373   | 99807   | 1.75E-40  | 0.81 |
| 30166 | 123230  | 123550  | 2.63E-19  | 0.83 |
| 30166 | 128073  | 128582  | 2.97E-06  | 0.88 |
| 30166 | 133850  | 134370  | 1.84E-35  | 0.88 |
| 30166 | 160661  | 161289  | 4.80E-07  | 0.78 |
| 30166 | 162212  | 163004  | 2.86E-03  | 0.8  |
| 30166 | 163676  | 164347  | 2.51E-09  | 0.9  |
| 30166 | 171565  | 172198  | 5.21E-09  | 0.95 |
| 30166 | 177842  | 178053  | 1.62E-08  | 1    |
| 30166 | 190282  | 190522  | 4.16E-27  | 0.95 |
| 30166 | 190908  | 191347  | 6.44E-15  | 0.93 |
| 30166 | 191680  | 192361  | 8.99E-24  | 0.91 |
| 30166 | 210721  | 210970  | 3.78E-10  | 0.88 |
| 30167 | 13964   | 14280   | 1.37E-08  | 0.79 |



|       |        |        |           |      |
|-------|--------|--------|-----------|------|
| 30167 | 29237  | 29634  | 1.36E-29  | 0.93 |
| 30167 | 37721  | 38460  | 2.92E-77  | 0.97 |
| 30167 | 46807  | 47091  | 5.70E-14  | 0.96 |
| 30167 | 159229 | 160203 | 4.32E-52  | 0.94 |
| 30167 | 180707 | 181058 | 6.01E-07  | 0.77 |
| 30167 | 185676 | 188014 | 6.34E-206 | 0.92 |
| 30167 | 189074 | 189507 | 1.11E-17  | 0.87 |
| 30167 | 190761 | 191427 | 3.53E-62  | 0.94 |
| 30167 | 236272 | 236642 | 2.33E-28  | 0.88 |
| 30167 | 244234 | 245386 | 3.04E-42  | 0.75 |
| 30167 | 278283 | 278754 | 1.64E-18  | 0.92 |
| 30167 | 336716 | 337026 | 6.53E-19  | 0.91 |
| 30167 | 355616 | 355960 | 3.61E-27  | 0.81 |
| 30167 | 356880 | 357353 | 1.95E-23  | 0.87 |
| 30167 | 363135 | 363730 | 2.56E-31  | 0.9  |
| 30167 | 379559 | 380015 | 5.70E-42  | 0.84 |
| 30167 | 380252 | 380592 | 1.96E-22  | 0.66 |
| 30167 | 382613 | 383837 | 1.29E-40  | 0.61 |
| 30167 | 404191 | 404919 | 4.55E-55  | 0.94 |
| 30167 | 406706 | 407903 | 4.04E-34  | 0.76 |
| 30167 | 410291 | 410818 | 6.66E-19  | 0.75 |
| 30167 | 432738 | 433094 | 1.36E-50  | 0.97 |
| 30167 | 461735 | 461994 | 1.40E-08  | 0.76 |
| 30167 | 491430 | 491752 | 1.62E-29  | 0.86 |
| 30167 | 538506 | 538827 | 1.27E-126 | 0.93 |
| 30167 | 539497 | 541017 | 1.76E-135 | 0.94 |
| 30167 | 551057 | 551519 | 2.92E-10  | 0.76 |
| 30167 | 642173 | 642506 | 3.23E-14  | 0.82 |
| 30167 | 690000 | 690283 | 1.70E-06  | 0.69 |
| 30168 | 23632  | 23948  | 1.70E-08  | 0.89 |
| 30168 | 62465  | 62878  | 3.22E-12  | 0.86 |
| 30169 | 3690   | 4184   | 1.81E-20  | 0.83 |
| 30169 | 19940  | 21260  | 2.06E-53  | 0.9  |
| 30169 | 21766  | 22112  | 2.86E-41  | 0.87 |
| 30169 | 22320  | 22745  | 8.02E-35  | 0.92 |
| 30169 | 24834  | 25498  | 6.81E-28  | 0.85 |
| 30169 | 26083  | 26379  | 1.01E-16  | 0.9  |
| 30169 | 31864  | 33127  | 3.56E-78  | 0.89 |
| 30169 | 33813  | 34067  | 8.13E-12  | 0.64 |
| 30169 | 40317  | 40539  | 6.71E-25  | 0.91 |
| 30169 | 63771  | 64432  | 2.22E-42  | 0.76 |
| 30169 | 71789  | 72203  | 3.67E-43  | 0.86 |
| 30169 | 72825  | 73868  | 6.05E-54  | 0.91 |
| 30169 | 78903  | 81776  | 1.42E-153 | 0.82 |
| 30169 | 136491 | 136804 | 1.77E-16  | 0.84 |
| 30169 | 145779 | 146895 | 7.72E-40  | 0.76 |
| 30169 | 160414 | 160668 | 6.00E-24  | 0.87 |
| 30169 | 162394 | 164759 | 6.03E-184 | 0.89 |
| 30169 | 165057 | 165324 | 2.09E-34  | 0.9  |
| 30169 | 165769 | 167796 | 6.38E-71  | 0.83 |
| 30169 | 172764 | 173422 | 5.16E-42  | 0.77 |
| 30169 | 178038 | 178650 | 5.68E-26  | 0.86 |
| 30169 | 178891 | 179229 | 5.06E-43  | 0.96 |

|       |        |        |           |      |
|-------|--------|--------|-----------|------|
| 30169 | 179445 | 179747 | 6.16E-16  | 0.85 |
| 30169 | 200082 | 200513 | 4.41E-36  | 0.94 |
| 30169 | 202462 | 203364 | 3.36E-58  | 0.85 |
| 30169 | 209710 | 210381 | 7.80E-22  | 0.78 |
| 30169 | 217762 | 218421 | 1.44E-72  | 0.88 |
| 30169 | 218627 | 220071 | 2.06E-135 | 0.81 |
| 30169 | 243358 | 244955 | 6.48E-105 | 0.83 |
| 30169 | 248748 | 249477 | 1.36E-30  | 0.9  |
| 30169 | 250021 | 251108 | 1.04E-58  | 0.63 |
| 30169 | 254545 | 254931 | 3.79E-50  | 0.82 |
| 30169 | 255276 | 255667 | 4.53E-47  | 0.83 |
| 30169 | 258869 | 259810 | 8.50E-44  | 0.88 |
| 30169 | 260463 | 260938 | 4.61E-79  | 0.84 |
| 30169 | 261207 | 261473 | 2.04E-105 | 0.92 |
| 30169 | 306160 | 306726 | 3.08E-15  | 0.73 |
| 30169 | 307789 | 308086 | 1.85E-12  | 0.85 |
| 30169 | 321024 | 321247 | 2.25E-16  | 0.75 |
| 30169 | 363403 | 363914 | 2.15E-36  | 0.7  |
| 30169 | 364257 | 365279 | 2.26E-58  | 0.7  |
| 30169 | 367705 | 368207 | 3.59E-13  | 0.79 |
| 30169 | 374896 | 375210 | 3.41E-12  | 0.88 |
| 30169 | 376185 | 376477 | 1.35E-19  | 0.81 |
| 30169 | 377467 | 377885 | 4.45E-13  | 0.77 |
| 30169 | 384817 | 385477 | 3.32E-38  | 0.8  |
| 30169 | 401436 | 401780 | 4.90E-32  | 0.93 |
| 30169 | 406096 | 407222 | 8.67E-46  | 0.78 |
| 30169 | 408918 | 409236 | 1.25E-33  | 0.93 |
| 30169 | 410316 | 410828 | 5.03E-42  | 0.92 |
| 30169 | 411080 | 411587 | 6.31E-32  | 0.84 |
| 30169 | 425795 | 426006 | 2.32E-21  | 0.85 |
| 30169 | 426974 | 427549 | 4.60E-15  | 0.85 |
| 30169 | 439690 | 440209 | 5.42E-25  | 0.71 |
| 30169 | 456726 | 456988 | 1.64E-14  | 0.73 |
| 30169 | 464082 | 464444 | 2.93E-25  | 0.87 |
| 30169 | 464692 | 465322 | 3.51E-38  | 0.89 |
| 30169 | 468534 | 468831 | 8.69E-16  | 0.69 |
| 30169 | 509469 | 510154 | 1.20E-12  | 0.67 |
| 30169 | 544760 | 545066 | 2.26E-15  | 0.76 |
| 30169 | 567314 | 567755 | 2.10E-13  | 0.74 |
| 30169 | 567991 | 568517 | 6.61E-47  | 0.81 |
| 30169 | 578392 | 579949 | 5.22E-49  | 0.6  |
| 30169 | 587346 | 588478 | 2.09E-57  | 0.85 |
| 30169 | 626725 | 627323 | 1.61E-26  | 0.87 |
| 30169 | 637991 | 638249 | 1.63E-27  | 0.83 |
| 30169 | 673100 | 673990 | 7.03E-30  | 0.87 |
| 30169 | 688059 | 689057 | 2.94E-63  | 0.93 |
| 30169 | 694966 | 695306 | 3.73E-10  | 0.78 |
| 30169 | 696825 | 697119 | 9.92E-20  | 0.87 |
| 30169 | 706514 | 707934 | 3.23E-60  | 0.79 |
| 30169 | 708180 | 708561 | 3.02E-30  | 0.78 |
| 30169 | 710745 | 711039 | 1.07E-12  | 0.73 |
| 30169 | 711614 | 711932 | 3.83E-22  | 0.85 |
| 30169 | 712172 | 712584 | 1.98E-27  | 0.72 |

|       |         |         |           |      |
|-------|---------|---------|-----------|------|
| 30169 | 739080  | 739759  | 1.87E-20  | 0.76 |
| 30169 | 752696  | 753289  | 3.60E-31  | 0.67 |
| 30169 | 754647  | 755197  | 4.40E-25  | 0.78 |
| 30169 | 763553  | 765132  | 7.23E-123 | 0.83 |
| 30169 | 781221  | 783076  | 5.20E-118 | 0.8  |
| 30169 | 801062  | 804130  | 1.21E-209 | 0.79 |
| 30169 | 849336  | 849664  | 1.94E-32  | 0.81 |
| 30169 | 850117  | 850489  | 7.81E-12  | 0.66 |
| 30169 | 918924  | 919867  | 1.16E-41  | 0.66 |
| 30169 | 920101  | 920774  | 3.28E-52  | 0.91 |
| 30169 | 952391  | 952664  | 1.72E-25  | 0.73 |
| 30169 | 959970  | 960387  | 1.05E-27  | 0.77 |
| 30169 | 975030  | 976309  | 4.24E-51  | 0.84 |
| 30169 | 977708  | 978024  | 6.65E-27  | 0.9  |
| 30169 | 1025456 | 1026728 | 9.60E-52  | 0.61 |
| 30169 | 1052554 | 1053380 | 2.89E-53  | 0.7  |
| 30169 | 1072551 | 1072836 | 2.42E-21  | 0.94 |
| 30169 | 1077539 | 1077820 | 5.00E-26  | 0.72 |
| 30169 | 1090166 | 1090753 | 2.25E-39  | 0.9  |
| 30169 | 1091095 | 1091448 | 1.43E-13  | 0.79 |
| 30169 | 1118898 | 1119358 | 2.96E-44  | 0.89 |
| 30169 | 1149113 | 1149902 | 1.41E-42  | 0.84 |
| 30169 | 1166969 | 1167936 | 2.27E-73  | 0.75 |
| 30169 | 1168173 | 1170560 | 4.49E-165 | 0.86 |
| 30169 | 1173464 | 1173954 | 3.08E-08  | 0.79 |
| 30169 | 1180510 | 1181015 | 9.02E-17  | 0.75 |
| 30169 | 1182247 | 1182645 | 1.32E-19  | 0.91 |
| 30169 | 1209673 | 1209923 | 5.12E-15  | 0.79 |
| 30169 | 1210440 | 1211670 | 1.26E-83  | 0.93 |
| 30169 | 1217513 | 1217883 | 1.30E-11  | 0.77 |
| 30169 | 1221401 | 1222440 | 1.03E-145 | 0.87 |
| 30169 | 1241030 | 1241699 | 2.09E-26  | 0.81 |
| 30169 | 1245209 | 1245570 | 2.48E-15  | 0.85 |
| 30169 | 1248704 | 1249045 | 1.13E-13  | 0.65 |
| 30169 | 1262007 | 1263230 | 1.28E-60  | 0.79 |
| 30169 | 1289034 | 1290050 | 2.48E-86  | 0.87 |
| 30169 | 1309205 | 1309949 | 4.01E-73  | 0.88 |
| 30169 | 1317976 | 1318487 | 1.52E-26  | 0.85 |
| 30169 | 1323104 | 1323397 | 1.45E-20  | 0.82 |
| 30169 | 1324034 | 1324251 | 2.13E-26  | 0.71 |
| 30169 | 1324597 | 1325208 | 3.11E-37  | 0.86 |
| 30169 | 1325422 | 1326115 | 1.46E-60  | 0.92 |
| 30169 | 1333237 | 1334020 | 2.56E-52  | 0.72 |
| 30169 | 1334360 | 1335256 | 2.24E-31  | 0.83 |
| 30169 | 1335472 | 1335973 | 2.76E-30  | 0.82 |
| 30169 | 1364486 | 1364747 | 1.71E-10  | 0.75 |
| 30169 | 1401844 | 1402168 | 1.02E-52  | 0.94 |
| 30169 | 1402413 | 1402730 | 3.36E-53  | 0.91 |
| 30169 | 1424593 | 1424926 | 1.49E-60  | 0.83 |
| 30169 | 1425158 | 1425884 | 9.71E-40  | 0.91 |
| 30169 | 1428103 | 1429306 | 4.90E-47  | 0.73 |
| 30169 | 1432217 | 1432432 | 1.35E-18  | 0.81 |
| 30169 | 1432765 | 1432966 | 2.73E-17  | 0.81 |

|       |         |         |           |      |
|-------|---------|---------|-----------|------|
| 30169 | 1433678 | 1434911 | 2.00E-46  | 0.81 |
| 30169 | 1436270 | 1436724 | 1.98E-26  | 0.88 |
| 30169 | 1453954 | 1454390 | 1.58E-50  | 0.92 |
| 30169 | 1454772 | 1456714 | 2.60E-90  | 0.83 |
| 30169 | 1483386 | 1485510 | 1.58E-77  | 0.83 |
| 30169 | 1523891 | 1525202 | 1.68E-130 | 0.68 |
| 30169 | 1556181 | 1556712 | 1.85E-43  | 0.89 |
| 30169 | 1560011 | 1560458 | 2.82E-42  | 0.69 |
| 30169 | 1560703 | 1561049 | 4.42E-10  | 0.75 |
| 30169 | 1578159 | 1579176 | 6.87E-53  | 0.75 |
| 30169 | 1584794 | 1585566 | 1.11E-44  | 0.78 |
| 30169 | 1648540 | 1649020 | 5.01E-23  | 0.77 |
| 30169 | 1649399 | 1649686 | 6.40E-16  | 0.69 |
| 30169 | 1662081 | 1662511 | 2.01E-24  | 0.88 |
| 30169 | 1700399 | 1700904 | 4.96E-26  | 0.81 |
| 30169 | 1706276 | 1706482 | 8.99E-12  | 0.71 |
| 30169 | 1712278 | 1712603 | 3.77E-24  | 0.86 |
| 30169 | 1768479 | 1768934 | 3.52E-28  | 0.89 |
| 30169 | 1772438 | 1773643 | 1.52E-47  | 0.69 |
| 30169 | 1788992 | 1789210 | 4.40E-19  | 0.83 |
| 30169 | 1816223 | 1816683 | 2.21E-31  | 0.77 |
| 30169 | 1817006 | 1817242 | 9.55E-10  | 0.71 |
| 30169 | 1843490 | 1844941 | 1.09E-68  | 0.7  |
| 30169 | 1873088 | 1873811 | 3.94E-22  | 0.82 |
| 30169 | 1882239 | 1882826 | 6.92E-18  | 0.83 |
| 30169 | 1885973 | 1886197 | 1.03E-20  | 0.89 |
| 30169 | 1886465 | 1886893 | 9.19E-11  | 0.8  |
| 30169 | 1891879 | 1894020 | 2.75E-68  | 0.77 |
| 30169 | 1986400 | 1986783 | 8.24E-28  | 0.89 |
| 30169 | 1987565 | 1989294 | 7.37E-65  | 0.84 |
| 30169 | 2001436 | 2002180 | 8.50E-40  | 0.76 |
| 30169 | 2009969 | 2010845 | 1.08E-22  | 0.62 |
| 30169 | 2020125 | 2020398 | 3.15E-20  | 0.77 |
| 30169 | 2024894 | 2025651 | 8.20E-38  | 0.87 |
| 30169 | 2034653 | 2036220 | 8.15E-62  | 0.78 |
| 30169 | 2092494 | 2093303 | 7.00E-63  | 0.87 |
| 30169 | 2094650 | 2094994 | 7.98E-19  | 0.81 |
| 30169 | 2112768 | 2113076 | 2.57E-18  | 0.73 |
| 30169 | 2133065 | 2133677 | 2.46E-24  | 0.81 |
| 30169 | 2188393 | 2189466 | 3.48E-82  | 0.96 |
| 30169 | 2221014 | 2222144 | 2.36E-84  | 0.79 |
| 30169 | 2239904 | 2240820 | 2.95E-45  | 0.82 |
| 30169 | 2240202 | 2240859 | 1.51E-31  | 0.82 |
| 30169 | 2262452 | 2263319 | 5.54E-33  | 0.72 |
| 30169 | 2297834 | 2298155 | 9.82E-16  | 0.81 |
| 30169 | 2298358 | 2298915 | 4.50E-20  | 0.77 |
| 30169 | 2306595 | 2307197 | 2.58E-24  | 0.83 |
| 30169 | 2333155 | 2333589 | 4.28E-43  | 0.92 |
| 30170 | 5222    | 5790    | 6.54E-27  | 0.83 |
| 30170 | 45462   | 45775   | 6.48E-11  | 0.81 |
| 30170 | 52417   | 53291   | 1.45E-64  | 0.84 |
| 30170 | 53658   | 54100   | 8.98E-27  | 0.81 |
| 30170 | 57839   | 58132   | 3.20E-27  | 0.94 |

|       |        |        |           |      |
|-------|--------|--------|-----------|------|
| 30170 | 58595  | 59168  | 6.23E-24  | 0.65 |
| 30170 | 69135  | 69361  | 7.78E-23  | 0.89 |
| 30170 | 71013  | 71303  | 4.33E-21  | 0.79 |
| 30170 | 72993  | 74174  | 5.31E-33  | 0.81 |
| 30170 | 75415  | 76021  | 2.17E-41  | 0.89 |
| 30170 | 116884 | 117191 | 1.13E-22  | 0.89 |
| 30170 | 138955 | 139951 | 4.46E-26  | 0.75 |
| 30170 | 169425 | 170839 | 2.06E-51  | 0.81 |
| 30170 | 171118 | 171544 | 3.99E-18  | 0.62 |
| 30170 | 202787 | 203124 | 1.39E-29  | 0.94 |
| 30170 | 203513 | 203821 | 1.01E-14  | 0.89 |
| 30170 | 204023 | 204307 | 3.22E-14  | 0.79 |
| 30170 | 204644 | 206962 | 2.10E-139 | 0.75 |
| 30170 | 221787 | 222294 | 4.96E-12  | 0.71 |
| 30170 | 240794 | 241145 | 3.85E-18  | 0.92 |
| 30170 | 261404 | 261644 | 2.82E-42  | 0.67 |
| 30170 | 261998 | 262467 | 3.50E-37  | 0.7  |
| 30170 | 266462 | 267019 | 4.90E-26  | 0.8  |
| 30170 | 348272 | 348569 | 2.20E-25  | 0.87 |
| 30170 | 349353 | 349750 | 4.52E-21  | 0.92 |
| 30170 | 350006 | 350272 | 1.15E-18  | 0.75 |
| 30170 | 377641 | 377850 | 3.40E-15  | 0.7  |
| 30170 | 410559 | 411040 | 3.84E-32  | 0.86 |
| 30170 | 430327 | 431315 | 4.77E-27  | 0.72 |
| 30170 | 466540 | 467063 | 2.87E-25  | 0.86 |
| 30170 | 493398 | 493718 | 4.36E-29  | 0.82 |
| 30170 | 494057 | 494590 | 8.67E-29  | 0.89 |
| 30170 | 503608 | 503996 | 1.20E-27  | 0.83 |
| 30170 | 506341 | 507271 | 9.05E-56  | 0.84 |
| 30170 | 511461 | 512133 | 1.52E-66  | 0.78 |
| 30170 | 537941 | 538331 | 4.02E-11  | 0.75 |
| 30170 | 560127 | 560385 | 7.43E-06  | 0.87 |
| 30170 | 572610 | 572881 | 1.91E-32  | 0.86 |
| 30170 | 575965 | 576814 | 1.20E-10  | 0.84 |
| 30170 | 636119 | 636641 | 7.61E-13  | 0.86 |
| 30170 | 637291 | 638336 | 3.05E-44  | 0.88 |
| 30170 | 638667 | 639166 | 1.91E-39  | 0.91 |
| 30170 | 658495 | 658696 | 1.48E-08  | 0.75 |
| 30170 | 710615 | 710896 | 2.77E-31  | 0.85 |
| 30170 | 719836 | 720484 | 6.45E-20  | 0.81 |
| 30170 | 728346 | 728591 | 1.13E-28  | 0.87 |
| 30170 | 768475 | 768895 | 7.96E-12  | 0.77 |
| 30170 | 770589 | 770963 | 9.81E-13  | 0.81 |
| 30170 | 770654 | 771172 | 1.30E-18  | 0.82 |
| 30170 | 795377 | 795921 | 3.63E-18  | 0.84 |
| 30170 | 804719 | 805886 | 4.25E-63  | 0.83 |
| 30170 | 841597 | 842270 | 2.63E-17  | 0.76 |
| 30170 | 844624 | 846062 | 3.17E-120 | 0.71 |
| 30170 | 865692 | 866378 | 6.37E-73  | 0.95 |
| 30170 | 866817 | 867166 | 1.27E-32  | 0.88 |
| 30170 | 873336 | 873692 | 1.57E-08  | 0.82 |
| 30170 | 878995 | 880125 | 1.39E-45  | 0.85 |
| 30170 | 880904 | 882565 | 2.62E-66  | 0.7  |

|       |         |         |           |      |
|-------|---------|---------|-----------|------|
| 30170 | 934264  | 934514  | 8.97E-26  | 0.95 |
| 30170 | 953558  | 954050  | 2.40E-09  | 0.75 |
| 30170 | 1111052 | 1111287 | 1.94E-10  | 0.68 |
| 30170 | 1200968 | 1201185 | 2.46E-20  | 0.83 |
| 30170 | 1260415 | 1261408 | 7.15E-99  | 0.93 |
| 30170 | 1261616 | 1262069 | 9.88E-40  | 0.9  |
| 30170 | 1307943 | 1308543 | 1.11E-50  | 0.92 |
| 30170 | 1340684 | 1341208 | 4.87E-20  | 0.81 |
| 30170 | 1353582 | 1353982 | 3.23E-18  | 0.96 |
| 30170 | 1381816 | 1382444 | 5.46E-44  | 0.64 |
| 30170 | 1407706 | 1408007 | 5.83E-24  | 0.79 |
| 30170 | 1448617 | 1449544 | 1.72E-44  | 0.85 |
| 30170 | 1469686 | 1470319 | 1.47E-42  | 0.75 |
| 30170 | 1485716 | 1486998 | 1.57E-67  | 0.77 |
| 30170 | 1498423 | 1499364 | 2.73E-31  | 0.61 |
| 30170 | 1524537 | 1524983 | 2.03E-38  | 0.71 |
| 30170 | 1525459 | 1526095 | 1.63E-92  | 0.67 |
| 30170 | 1529479 | 1530231 | 1.93E-51  | 0.78 |
| 30170 | 1530965 | 1533925 | 2.90E-177 | 0.88 |
| 30170 | 1574172 | 1574530 | 8.81E-22  | 0.94 |
| 30170 | 1612189 | 1612911 | 4.48E-27  | 0.81 |
| 30170 | 1613858 | 1614144 | 3.91E-12  | 0.82 |
| 30170 | 1614998 | 1616180 | 2.39E-69  | 0.86 |
| 30170 | 1616873 | 1617157 | 3.04E-27  | 0.82 |
| 30170 | 1624414 | 1625035 | 1.59E-40  | 0.89 |
| 30170 | 1625293 | 1625580 | 1.03E-22  | 0.8  |
| 30170 | 1627308 | 1627531 | 1.15E-12  | 0.68 |
| 30170 | 1627783 | 1628272 | 3.83E-51  | 0.95 |
| 30170 | 1639367 | 1640187 | 1.82E-45  | 0.9  |
| 30170 | 1641675 | 1641957 | 2.39E-46  | 0.95 |
| 30170 | 1642530 | 1643260 | 3.58E-22  | 0.74 |
| 30170 | 1659624 | 1660123 | 2.98E-18  | 0.8  |
| 30170 | 1691366 | 1691690 | 1.85E-11  | 0.88 |
| 30170 | 1722574 | 1722870 | 2.07E-39  | 0.86 |
| 30170 | 1723669 | 1724442 | 2.92E-32  | 0.78 |
| 30170 | 1726599 | 1727134 | 2.72E-31  | 0.78 |
| 30170 | 1739474 | 1740502 | 7.44E-64  | 0.93 |
| 30170 | 1741305 | 1741949 | 7.62E-29  | 0.9  |
| 30170 | 1742191 | 1742507 | 1.19E-20  | 0.8  |
| 30170 | 1762570 | 1762913 | 6.76E-36  | 0.88 |
| 30170 | 1783765 | 1784852 | 7.20E-73  | 0.82 |
| 30170 | 1787485 | 1788517 | 1.90E-59  | 0.8  |
| 30170 | 1815093 | 1815632 | 2.32E-36  | 0.82 |
| 30170 | 1816166 | 1816824 | 1.33E-26  | 0.83 |
| 30170 | 1820372 | 1820979 | 1.38E-46  | 0.92 |
| 30170 | 1859543 | 1860103 | 6.37E-32  | 0.75 |
| 30170 | 1906180 | 1906662 | 1.51E-21  | 0.88 |
| 30170 | 2003162 | 2003590 | 3.19E-16  | 0.73 |
| 30170 | 2065591 | 2065948 | 6.51E-22  | 0.85 |
| 30170 | 2077352 | 2078845 | 5.08E-55  | 0.64 |
| 30170 | 2088397 | 2088953 | 1.38E-26  | 0.93 |
| 30170 | 2094158 | 2094903 | 7.29E-32  | 0.87 |
| 30170 | 2095202 | 2096033 | 3.03E-26  | 0.76 |

|       |         |         |           |      |
|-------|---------|---------|-----------|------|
| 30170 | 2102214 | 2103871 | 5.34E-66  | 0.6  |
| 30170 | 2111765 | 2112087 | 2.26E-25  | 0.79 |
| 30170 | 2115884 | 2116149 | 6.98E-17  | 0.66 |
| 30170 | 2126002 | 2126357 | 2.89E-65  | 0.93 |
| 30170 | 2176352 | 2176771 | 2.25E-64  | 0.85 |
| 30170 | 2187260 | 2187672 | 2.75E-26  | 0.87 |
| 30170 | 2188667 | 2190397 | 4.16E-62  | 0.76 |
| 30170 | 2204716 | 2205054 | 3.86E-14  | 0.78 |
| 30170 | 2239645 | 2240255 | 1.93E-29  | 0.84 |
| 30170 | 2246206 | 2246511 | 8.11E-20  | 0.83 |
| 30170 | 2255832 | 2256686 | 5.17E-17  | 0.64 |
| 30170 | 2278256 | 2278928 | 4.29E-38  | 0.73 |
| 30170 | 2298310 | 2298698 | 6.82E-31  | 0.87 |
| 30170 | 2305645 | 2306028 | 2.65E-31  | 0.91 |
| 30170 | 2317327 | 2317623 | 2.79E-37  | 0.97 |
| 30170 | 2319579 | 2320645 | 1.39E-89  | 0.92 |
| 30170 | 2322602 | 2323089 | 5.30E-33  | 0.88 |
| 30170 | 2325053 | 2326190 | 4.17E-50  | 0.71 |
| 30170 | 2329821 | 2330347 | 2.72E-34  | 0.84 |
| 30170 | 2334630 | 2335079 | 6.57E-62  | 0.81 |
| 30170 | 2366069 | 2366284 | 3.12E-23  | 0.92 |
| 30170 | 2369920 | 2370689 | 6.80E-57  | 0.88 |
| 30170 | 2386263 | 2386626 | 1.39E-18  | 0.78 |
| 30170 | 2409571 | 2411154 | 4.86E-69  | 0.79 |
| 30170 | 2435336 | 2436643 | 4.02E-77  | 0.76 |
| 30170 | 2454104 | 2454489 | 2.91E-13  | 0.77 |
| 30170 | 2460191 | 2460934 | 6.76E-29  | 0.8  |
| 30170 | 2469031 | 2469978 | 9.62E-143 | 0.92 |
| 30170 | 2470514 | 2471143 | 5.47E-48  | 0.93 |
| 30170 | 2513115 | 2514082 | 1.70E-53  | 0.85 |
| 30170 | 2518021 | 2519094 | 1.48E-46  | 0.78 |
| 30170 | 2602877 | 2603409 | 2.69E-29  | 0.6  |
| 30170 | 2610822 | 2611051 | 3.79E-23  | 0.87 |
| 30170 | 2611357 | 2611850 | 1.87E-32  | 0.85 |
| 30170 | 2649260 | 2649854 | 4.72E-73  | 0.83 |
| 30170 | 2701565 | 2702212 | 3.79E-25  | 0.8  |
| 30170 | 2702421 | 2703445 | 4.53E-54  | 0.75 |
| 30170 | 2704028 | 2704984 | 2.42E-77  | 0.82 |
| 30170 | 2705281 | 2709513 | 0.00E+00  | 0.91 |
| 30170 | 2711575 | 2711993 | 1.75E-15  | 0.76 |
| 30170 | 2717884 | 2718287 | 3.21E-27  | 0.87 |
| 30170 | 2719601 | 2720067 | 1.63E-21  | 0.84 |
| 30170 | 2737244 | 2737962 | 1.37E-21  | 0.79 |
| 30170 | 2767769 | 2768363 | 9.93E-39  | 0.86 |
| 30170 | 2794513 | 2795014 | 5.01E-23  | 0.81 |
| 30170 | 2802513 | 2804600 | 3.66E-90  | 0.8  |
| 30170 | 2806827 | 2807223 | 4.80E-36  | 0.95 |
| 30170 | 2807579 | 2808037 | 1.60E-58  | 0.93 |
| 30170 | 2810663 | 2811097 | 5.52E-37  | 0.88 |
| 30170 | 2812068 | 2812316 | 6.94E-16  | 0.83 |
| 30170 | 2817870 | 2818243 | 4.66E-40  | 0.93 |
| 30170 | 2834245 | 2835636 | 8.71E-91  | 0.87 |
| 30170 | 2849332 | 2849854 | 1.63E-29  | 0.81 |

|       |         |         |           |      |
|-------|---------|---------|-----------|------|
| 30170 | 2952024 | 2952362 | 6.44E-16  | 0.82 |
| 30170 | 2969992 | 2970584 | 1.17E-17  | 0.76 |
| 30170 | 2970660 | 2971463 | 1.01E-29  | 0.82 |
| 30170 | 2971716 | 2972174 | 4.70E-16  | 0.8  |
| 30170 | 2972469 | 2973164 | 1.59E-34  | 0.62 |
| 30170 | 3000577 | 3001434 | 7.33E-37  | 0.81 |
| 30170 | 3035818 | 3036926 | 1.05E-41  | 0.63 |
| 30170 | 3037931 | 3039090 | 7.53E-61  | 0.66 |
| 30170 | 3049977 | 3050857 | 5.67E-33  | 0.77 |
| 30170 | 3065977 | 3066270 | 1.15E-47  | 0.96 |
| 30170 | 3066656 | 3067021 | 8.90E-19  | 0.81 |
| 30170 | 3076573 | 3077785 | 1.04E-40  | 0.72 |
| 30170 | 3083141 | 3083686 | 1.05E-33  | 0.87 |
| 30170 | 3084080 | 3084483 | 2.39E-22  | 0.83 |
| 30170 | 3085462 | 3085986 | 6.05E-63  | 0.89 |
| 30170 | 3086426 | 3087663 | 2.70E-65  | 0.88 |
| 30170 | 3091048 | 3091303 | 9.12E-29  | 0.88 |
| 30170 | 3119713 | 3120187 | 7.43E-18  | 0.62 |
| 30170 | 3124072 | 3124973 | 1.32E-55  | 0.7  |
| 30170 | 3149112 | 3149610 | 2.97E-38  | 0.86 |
| 30170 | 3190472 | 3190936 | 2.97E-27  | 0.82 |
| 30170 | 3204292 | 3205040 | 8.28E-18  | 0.66 |
| 30170 | 3205263 | 3205910 | 2.60E-40  | 0.78 |
| 30170 | 3214557 | 3214816 | 5.12E-12  | 0.8  |
| 30170 | 3215925 | 3216945 | 2.79E-25  | 0.79 |
| 30170 | 3217573 | 3217927 | 3.36E-13  | 0.8  |
| 30170 | 3277045 | 3277491 | 4.40E-18  | 0.61 |
| 30170 | 3278644 | 3279157 | 6.21E-47  | 0.9  |
| 30170 | 3293806 | 3294057 | 2.42E-13  | 0.9  |
| 30170 | 3299508 | 3299810 | 2.31E-24  | 0.77 |
| 30170 | 3320623 | 3322277 | 1.06E-54  | 0.61 |
| 30170 | 3337152 | 3338244 | 2.55E-64  | 0.67 |
| 30170 | 3338553 | 3338957 | 1.37E-58  | 0.93 |
| 30170 | 3344723 | 3345022 | 3.21E-19  | 0.78 |
| 30170 | 3345355 | 3346091 | 4.23E-79  | 0.94 |
| 30170 | 3346312 | 3346589 | 9.63E-34  | 0.98 |
| 30170 | 3387142 | 3387774 | 4.88E-26  | 0.92 |
| 30170 | 3407176 | 3407681 | 1.00E-18  | 0.7  |
| 30170 | 3458211 | 3458930 | 4.98E-46  | 0.76 |
| 30170 | 3482307 | 3483901 | 1.22E-76  | 0.65 |
| 30170 | 3498814 | 3499679 | 1.31E-57  | 0.84 |
| 30170 | 3501502 | 3502572 | 2.06E-111 | 0.97 |
| 30170 | 3502794 | 3503098 | 1.10E-71  | 0.96 |
| 30170 | 3505925 | 3508196 | 4.76E-111 | 0.79 |
| 30170 | 3510210 | 3510632 | 5.86E-26  | 0.84 |
| 30170 | 3577667 | 3578586 | 1.91E-43  | 0.8  |
| 30170 | 3610297 | 3611541 | 1.13E-49  | 0.81 |
| 30170 | 3612163 | 3613370 | 1.60E-63  | 0.83 |
| 30170 | 3659970 | 3660539 | 1.79E-12  | 0.84 |
| 30170 | 3684101 | 3684774 | 9.27E-41  | 0.72 |
| 30170 | 3693408 | 3694036 | 9.45E-25  | 0.61 |
| 30170 | 3694303 | 3694708 | 3.02E-43  | 0.76 |
| 30170 | 3695755 | 3696003 | 3.60E-37  | 0.85 |



|       |         |         |           |      |
|-------|---------|---------|-----------|------|
| 30170 | 3698707 | 3700137 | 2.13E-63  | 0.8  |
| 30170 | 3725888 | 3726782 | 9.44E-52  | 0.8  |
| 30170 | 3727007 | 3727390 | 2.82E-57  | 0.86 |
| 30170 | 3727599 | 3728258 | 1.12E-50  | 0.96 |
| 30170 | 3771186 | 3771451 | 1.43E-25  | 0.89 |
| 30170 | 3812974 | 3813651 | 6.32E-56  | 0.91 |
| 30170 | 3879876 | 3880624 | 1.84E-25  | 0.83 |
| 30170 | 3885894 | 3886215 | 1.59E-65  | 0.83 |
| 30170 | 3886531 | 3886912 | 3.39E-42  | 0.83 |
| 30170 | 3890999 | 3891306 | 1.46E-29  | 0.86 |
| 30170 | 3898175 | 3899277 | 2.24E-81  | 0.71 |
| 30170 | 3924238 | 3925319 | 1.84E-62  | 0.82 |
| 30170 | 3926230 | 3926567 | 3.31E-19  | 0.78 |
| 30170 | 3927947 | 3928185 | 1.33E-27  | 0.89 |
| 30170 | 3992509 | 3992735 | 3.22E-07  | 0.78 |
| 30170 | 4008999 | 4010438 | 4.07E-56  | 0.78 |
| 30170 | 4010904 | 4011321 | 6.90E-24  | 0.88 |
| 30170 | 4042349 | 4043075 | 3.60E-42  | 0.83 |
| 30170 | 4044042 | 4045144 | 1.20E-36  | 0.66 |
| 30170 | 4049043 | 4050032 | 6.13E-29  | 0.79 |
| 30170 | 4050318 | 4050579 | 3.25E-15  | 0.86 |
| 30170 | 4053098 | 4053872 | 9.73E-27  | 0.69 |
| 30170 | 4054117 | 4054889 | 8.52E-53  | 0.85 |
| 30170 | 4055098 | 4055961 | 1.81E-21  | 0.81 |
| 30170 | 4057032 | 4058133 | 4.82E-97  | 0.7  |
| 30170 | 4070888 | 4071798 | 7.63E-54  | 0.91 |
| 30170 | 4078244 | 4078463 | 3.29E-29  | 0.78 |
| 30170 | 4079274 | 4079690 | 3.20E-20  | 0.87 |
| 30170 | 4081684 | 4082435 | 3.21E-19  | 0.78 |
| 30170 | 4096655 | 4097574 | 5.43E-44  | 0.68 |
| 30170 | 4113442 | 4113939 | 5.27E-32  | 0.93 |
| 30170 | 4122640 | 4122843 | 7.94E-29  | 0.93 |
| 30170 | 4157439 | 4158070 | 1.27E-31  | 0.78 |
| 30170 | 4165174 | 4165567 | 5.58E-28  | 0.85 |
| 30170 | 4168253 | 4168562 | 2.62E-21  | 0.92 |
| 30170 | 4190833 | 4191401 | 1.45E-26  | 0.79 |
| 30170 | 4191627 | 4191942 | 1.13E-29  | 0.84 |
| 30170 | 4206378 | 4207617 | 2.38E-75  | 0.89 |
| 30170 | 4207856 | 4209275 | 1.93E-23  | 0.68 |
| 30170 | 4244649 | 4245273 | 9.49E-46  | 0.66 |
| 30170 | 4251639 | 4252214 | 3.20E-27  | 0.81 |
| 30170 | 4256376 | 4256812 | 1.03E-22  | 0.86 |
| 30170 | 4261459 | 4261685 | 3.57E-13  | 0.79 |
| 30170 | 4265094 | 4265818 | 4.30E-36  | 0.81 |
| 30170 | 4288217 | 4289206 | 1.23E-44  | 0.68 |
| 30170 | 4295977 | 4296956 | 1.47E-43  | 0.76 |
| 30170 | 4305428 | 4306214 | 2.15E-87  | 0.91 |
| 30170 | 4337456 | 4338580 | 2.04E-80  | 0.88 |
| 30170 | 4353068 | 4354092 | 7.22E-60  | 0.86 |
| 30170 | 4354519 | 4355120 | 3.61E-35  | 0.69 |
| 30170 | 4409255 | 4410102 | 4.04E-194 | 0.9  |
| 30170 | 4410349 | 4410924 | 2.24E-43  | 0.85 |
| 30170 | 4458150 | 4458719 | 1.47E-31  | 0.83 |

|       |         |         |           |      |
|-------|---------|---------|-----------|------|
| 30170 | 4459720 | 4460991 | 2.15E-52  | 0.76 |
| 30170 | 4477657 | 4478310 | 2.90E-81  | 0.92 |
| 30170 | 4484635 | 4485214 | 5.55E-23  | 0.74 |
| 30170 | 4495380 | 4496049 | 3.49E-19  | 0.8  |
| 30170 | 4496407 | 4497102 | 2.78E-22  | 0.69 |
| 30170 | 4531569 | 4533363 | 2.26E-55  | 0.82 |
| 30170 | 4569968 | 4571590 | 6.23E-101 | 0.69 |
| 30170 | 4571981 | 4573362 | 1.76E-160 | 0.9  |
| 30170 | 4576220 | 4577284 | 3.76E-26  | 0.85 |
| 30170 | 4579514 | 4579821 | 4.85E-46  | 0.93 |
| 30170 | 4588377 | 4588765 | 3.78E-23  | 0.82 |
| 30170 | 4594615 | 4595668 | 1.22E-28  | 0.66 |
| 30170 | 4596439 | 4596914 | 1.31E-24  | 0.79 |
| 30170 | 4605863 | 4606849 | 1.58E-14  | 0.75 |
| 30170 | 4609939 | 4611714 | 1.22E-82  | 0.87 |
| 30170 | 4622412 | 4623254 | 6.80E-50  | 0.75 |
| 30170 | 4633840 | 4634180 | 4.40E-29  | 0.66 |
| 30170 | 4636511 | 4637429 | 2.46E-18  | 0.73 |
| 30170 | 4641497 | 4643286 | 8.68E-88  | 0.69 |
| 30170 | 4645127 | 4645367 | 5.87E-35  | 0.89 |
| 30170 | 4645570 | 4645796 | 4.33E-14  | 0.8  |
| 30170 | 4655603 | 4656404 | 5.15E-57  | 0.78 |
| 30171 | 43593   | 43797   | 1.44E-38  | 0.87 |
| 30171 | 66902   | 67241   | 5.65E-21  | 0.9  |
| 30171 | 72139   | 72642   | 8.67E-44  | 0.97 |
| 30171 | 73860   | 74529   | 1.58E-41  | 0.96 |
| 30171 | 93854   | 94153   | 5.59E-50  | 0.97 |
| 30171 | 103384  | 103923  | 9.99E-44  | 0.91 |
| 30171 | 104954  | 105474  | 5.92E-51  | 0.9  |
| 30171 | 106094  | 106480  | 8.08E-14  | 0.79 |
| 30171 | 146831  | 147230  | 5.81E-22  | 0.87 |
| 30171 | 149826  | 150162  | 3.44E-20  | 0.95 |
| 30171 | 159032  | 159391  | 1.37E-20  | 0.8  |
| 30171 | 171162  | 171362  | 1.66E-05  | 0.75 |
| 30171 | 175153  | 176311  | 2.12E-75  | 0.93 |
| 30171 | 177992  | 178643  | 7.39E-61  | 0.82 |
| 30171 | 178894  | 179206  | 8.27E-36  | 0.96 |
| 30171 | 184065  | 184352  | 3.86E-20  | 0.88 |
| 30171 | 189989  | 190299  | 9.00E-07  | 0.74 |
| 30171 | 197300  | 197601  | 2.69E-29  | 0.95 |
| 30171 | 205632  | 206445  | 1.46E-49  | 0.85 |
| 30171 | 213587  | 214031  | 2.68E-18  | 0.77 |
| 30171 | 220790  | 222152  | 2.28E-193 | 0.95 |
| 30171 | 230508  | 231076  | 3.74E-22  | 0.8  |
| 30171 | 264118  | 264722  | 8.28E-14  | 0.93 |
| 30171 | 289103  | 289413  | 5.26E-06  | 0.73 |
| 30171 | 293672  | 294118  | 8.25E-13  | 0.88 |
| 30171 | 297582  | 298305  | 8.77E-59  | 0.95 |
| 30171 | 324522  | 325042  | 1.03E-30  | 0.87 |
| 30171 | 325384  | 325602  | 9.42E-21  | 0.75 |
| 30171 | 349376  | 349623  | 2.73E-08  | 0.9  |
| 30172 | 38991   | 39227   | 7.79E-05  | 0.79 |
| 30172 | 78600   | 78892   | 1.17E-37  | 0.98 |

|       |        |        |           |      |
|-------|--------|--------|-----------|------|
| 30172 | 79408  | 79824  | 7.15E-37  | 0.96 |
| 30172 | 80618  | 81485  | 7.59E-53  | 0.94 |
| 30172 | 83432  | 84030  | 1.40E-38  | 0.95 |
| 30172 | 84278  | 84762  | 2.91E-32  | 0.94 |
| 30172 | 125054 | 125311 | 8.81E-25  | 0.87 |
| 30172 | 134800 | 135069 | 3.12E-12  | 0.92 |
| 30172 | 193546 | 194238 | 5.52E-30  | 0.94 |
| 30174 | 5558   | 6549   | 1.90E-44  | 0.78 |
| 30174 | 9357   | 10205  | 1.30E-23  | 0.7  |
| 30174 | 27231  | 27862  | 4.39E-45  | 0.88 |
| 30174 | 96554  | 98143  | 7.73E-65  | 0.78 |
| 30174 | 152838 | 153635 | 1.63E-25  | 0.69 |
| 30174 | 157758 | 158266 | 2.77E-40  | 0.81 |
| 30174 | 186194 | 186883 | 3.94E-25  | 0.83 |
| 30174 | 187208 | 187692 | 1.04E-13  | 0.69 |
| 30174 | 188885 | 189750 | 3.00E-44  | 0.85 |
| 30174 | 198740 | 199445 | 4.00E-41  | 0.81 |
| 30174 | 199773 | 200059 | 5.47E-22  | 0.72 |
| 30174 | 205186 | 205770 | 1.44E-23  | 0.84 |
| 30174 | 230700 | 231851 | 7.85E-52  | 0.63 |
| 30174 | 236937 | 237338 | 9.76E-151 | 0.9  |
| 30174 | 258149 | 258629 | 9.49E-24  | 0.81 |
| 30174 | 258869 | 259588 | 1.17E-20  | 0.76 |
| 30174 | 297533 | 298763 | 1.02E-45  | 0.84 |
| 30174 | 303112 | 305126 | 1.55E-91  | 0.83 |
| 30174 | 307516 | 308424 | 5.87E-26  | 0.66 |
| 30174 | 318603 | 318991 | 1.33E-24  | 0.78 |
| 30174 | 319655 | 322362 | 4.31E-151 | 0.87 |
| 30174 | 331769 | 332874 | 2.82E-21  | 0.78 |
| 30174 | 332932 | 333574 | 2.89E-20  | 0.8  |
| 30174 | 339202 | 339674 | 2.24E-29  | 0.84 |
| 30174 | 412256 | 412985 | 7.91E-12  | 0.82 |
| 30174 | 418656 | 418998 | 1.29E-15  | 0.67 |
| 30174 | 420093 | 420427 | 3.62E-30  | 0.88 |
| 30174 | 422353 | 422683 | 7.55E-34  | 0.87 |
| 30174 | 426711 | 427023 | 1.42E-13  | 0.73 |
| 30174 | 428339 | 428584 | 1.70E-17  | 0.81 |
| 30174 | 428375 | 428618 | 1.27E-18  | 0.81 |
| 30174 | 478552 | 479467 | 3.86E-42  | 0.86 |
| 30174 | 493633 | 494218 | 1.13E-28  | 0.83 |
| 30174 | 497569 | 497945 | 5.52E-21  | 0.87 |
| 30174 | 498341 | 498697 | 4.42E-22  | 0.93 |
| 30174 | 531382 | 532292 | 3.20E-30  | 0.6  |
| 30174 | 556354 | 557082 | 2.83E-19  | 0.75 |
| 30174 | 659081 | 660684 | 2.09E-53  | 0.67 |
| 30174 | 663602 | 664014 | 1.40E-39  | 0.82 |
| 30174 | 666957 | 667280 | 6.31E-30  | 0.85 |
| 30174 | 667603 | 668064 | 1.51E-29  | 0.84 |
| 30174 | 673556 | 674199 | 2.57E-37  | 0.84 |
| 30174 | 674697 | 675343 | 3.57E-46  | 0.92 |
| 30174 | 691700 | 693206 | 1.22E-65  | 0.79 |
| 30174 | 693750 | 694742 | 3.85E-50  | 0.72 |
| 30174 | 699846 | 700165 | 2.18E-17  | 0.84 |

|       |         |         |          |      |
|-------|---------|---------|----------|------|
| 30174 | 704446  | 705587  | 7.38E-42 | 0.7  |
| 30174 | 715990  | 716199  | 2.04E-21 | 0.63 |
| 30174 | 719355  | 720349  | 3.29E-46 | 0.77 |
| 30174 | 720567  | 721329  | 9.46E-52 | 0.8  |
| 30174 | 750764  | 751181  | 1.97E-28 | 0.93 |
| 30174 | 751389  | 752190  | 2.76E-28 | 0.78 |
| 30174 | 779321  | 780111  | 5.48E-62 | 0.9  |
| 30174 | 780332  | 780832  | 4.96E-36 | 0.91 |
| 30174 | 802951  | 803164  | 1.15E-11 | 0.76 |
| 30174 | 804251  | 805066  | 8.18E-43 | 0.89 |
| 30174 | 805298  | 805919  | 1.33E-36 | 0.81 |
| 30174 | 813372  | 815361  | 3.13E-62 | 0.72 |
| 30174 | 817567  | 818004  | 2.81E-14 | 0.79 |
| 30174 | 820381  | 820710  | 4.63E-20 | 0.85 |
| 30174 | 821019  | 821817  | 1.30E-25 | 0.77 |
| 30174 | 834327  | 834995  | 1.05E-54 | 0.9  |
| 30174 | 836842  | 837704  | 5.55E-63 | 0.95 |
| 30174 | 853582  | 853925  | 8.28E-13 | 0.66 |
| 30174 | 913116  | 913365  | 7.46E-15 | 0.87 |
| 30174 | 913666  | 914148  | 5.12E-13 | 0.82 |
| 30174 | 914586  | 915193  | 5.94E-29 | 0.89 |
| 30174 | 915585  | 918223  | 2.82E-88 | 0.72 |
| 30174 | 930224  | 930829  | 3.92E-35 | 0.94 |
| 30174 | 931752  | 932085  | 1.58E-54 | 0.92 |
| 30174 | 935062  | 936784  | 4.44E-69 | 0.65 |
| 30174 | 956422  | 957252  | 1.65E-34 | 0.87 |
| 30174 | 986112  | 986464  | 2.72E-23 | 0.84 |
| 30174 | 992342  | 992991  | 4.14E-42 | 0.82 |
| 30174 | 999101  | 999551  | 4.02E-51 | 0.91 |
| 30174 | 999798  | 1000116 | 8.06E-13 | 0.73 |
| 30174 | 1001615 | 1002649 | 4.54E-39 | 0.87 |
| 30174 | 1013156 | 1013701 | 5.78E-34 | 0.84 |
| 30174 | 1016022 | 1016229 | 1.79E-27 | 0.96 |
| 30174 | 1036457 | 1037660 | 8.94E-78 | 0.62 |
| 30174 | 1038263 | 1038981 | 3.90E-78 | 0.93 |
| 30174 | 1040369 | 1040581 | 1.80E-47 | 0.98 |
| 30174 | 1082062 | 1082877 | 7.08E-62 | 0.89 |
| 30174 | 1123849 | 1124456 | 7.87E-24 | 0.9  |
| 30174 | 1124685 | 1125131 | 2.37E-13 | 0.84 |
| 30174 | 1128816 | 1130288 | 1.34E-74 | 0.75 |
| 30174 | 1148356 | 1149305 | 1.00E-24 | 0.78 |
| 30174 | 1169620 | 1170219 | 3.80E-70 | 0.9  |
| 30174 | 1175946 | 1176302 | 2.17E-27 | 0.94 |
| 30174 | 1176947 | 1177328 | 4.83E-26 | 0.67 |
| 30174 | 1190815 | 1191168 | 2.12E-22 | 0.95 |
| 30174 | 1194182 | 1194506 | 2.49E-25 | 0.84 |
| 30174 | 1209645 | 1210039 | 8.80E-58 | 0.91 |
| 30174 | 1215226 | 1215783 | 1.35E-30 | 0.81 |
| 30174 | 1219445 | 1219841 | 3.66E-23 | 0.79 |
| 30174 | 1270054 | 1270890 | 4.63E-39 | 0.83 |
| 30174 | 1311919 | 1312157 | 3.18E-07 | 0.81 |
| 30174 | 1324876 | 1325222 | 5.05E-25 | 0.86 |
| 30174 | 1326095 | 1327018 | 3.12E-22 | 0.81 |

|       |         |         |           |      |
|-------|---------|---------|-----------|------|
| 30174 | 1366715 | 1367801 | 7.95E-86  | 0.73 |
| 30174 | 1376026 | 1377476 | 3.83E-50  | 0.7  |
| 30174 | 1384790 | 1385014 | 1.15E-24  | 0.75 |
| 30174 | 1435531 | 1435931 | 2.83E-70  | 0.88 |
| 30174 | 1444132 | 1444557 | 1.01E-33  | 0.82 |
| 30174 | 1448471 | 1448999 | 1.09E-50  | 0.94 |
| 30174 | 1451424 | 1452559 | 7.40E-42  | 0.75 |
| 30174 | 1456962 | 1457197 | 5.58E-17  | 0.78 |
| 30174 | 1457447 | 1458487 | 2.28E-57  | 0.87 |
| 30174 | 1462900 | 1463440 | 7.13E-27  | 0.86 |
| 30174 | 1469377 | 1470329 | 5.71E-29  | 0.85 |
| 30174 | 1472025 | 1472481 | 1.65E-36  | 0.81 |
| 30174 | 1489297 | 1489888 | 2.52E-34  | 0.7  |
| 30174 | 1575852 | 1576366 | 4.31E-14  | 0.82 |
| 30174 | 1581857 | 1582563 | 2.00E-51  | 0.68 |
| 30174 | 1582775 | 1583153 | 1.91E-36  | 0.82 |
| 30174 | 1586462 | 1586739 | 9.38E-43  | 0.83 |
| 30174 | 1597026 | 1599632 | 7.25E-110 | 0.71 |
| 30174 | 1599889 | 1600413 | 8.19E-24  | 0.91 |
| 30174 | 1609831 | 1610301 | 7.21E-32  | 0.89 |
| 30174 | 1625052 | 1626022 | 3.94E-37  | 0.66 |
| 30174 | 1628564 | 1630922 | 8.24E-128 | 0.84 |
| 30174 | 1633217 | 1633809 | 2.76E-19  | 0.82 |
| 30174 | 1634150 | 1635177 | 1.36E-79  | 0.89 |
| 30174 | 1661934 | 1662405 | 2.23E-28  | 0.79 |
| 30174 | 1663805 | 1664747 | 2.38E-61  | 0.82 |
| 30174 | 1667105 | 1669989 | 4.15E-197 | 0.88 |
| 30174 | 1671900 | 1672290 | 3.20E-15  | 0.88 |
| 30174 | 1673066 | 1673576 | 4.35E-15  | 0.86 |
| 30174 | 1675862 | 1677413 | 3.17E-75  | 0.85 |
| 30174 | 1680434 | 1680779 | 7.67E-25  | 0.84 |
| 30174 | 1681767 | 1682205 | 7.10E-37  | 0.85 |
| 30174 | 1682653 | 1683710 | 2.50E-33  | 0.6  |
| 30174 | 1715438 | 1715807 | 1.86E-23  | 0.83 |
| 30174 | 1725644 | 1725854 | 1.24E-06  | 0.72 |
| 30174 | 1727805 | 1728835 | 5.96E-86  | 0.84 |
| 30174 | 1734819 | 1735082 | 6.74E-21  | 0.84 |
| 30174 | 1740698 | 1741375 | 2.19E-53  | 0.92 |
| 30174 | 1763470 | 1764300 | 1.85E-30  | 0.82 |
| 30174 | 1764807 | 1765866 | 1.45E-68  | 0.7  |
| 30174 | 1773402 | 1773992 | 1.59E-31  | 0.77 |
| 30174 | 1774205 | 1774442 | 1.50E-18  | 0.73 |
| 30174 | 1782669 | 1782893 | 6.06E-33  | 0.84 |
| 30174 | 1798541 | 1800280 | 6.71E-129 | 0.86 |
| 30174 | 1802138 | 1802954 | 1.77E-91  | 0.91 |
| 30174 | 1809651 | 1810361 | 1.93E-90  | 0.79 |
| 30174 | 1827432 | 1828099 | 3.96E-63  | 0.88 |
| 30174 | 1882062 | 1882686 | 1.18E-34  | 0.81 |
| 30174 | 1884178 | 1884384 | 8.77E-21  | 0.93 |
| 30174 | 1885929 | 1886249 | 1.67E-18  | 0.89 |
| 30174 | 1910175 | 1910648 | 2.28E-25  | 0.66 |
| 30174 | 1927365 | 1927673 | 7.25E-61  | 0.9  |
| 30174 | 1927903 | 1928336 | 4.07E-65  | 0.91 |

|       |         |         |           |      |
|-------|---------|---------|-----------|------|
| 30174 | 1928556 | 1928929 | 1.24E-43  | 0.86 |
| 30174 | 1929190 | 1929660 | 1.23E-56  | 0.76 |
| 30174 | 1943464 | 1945528 | 1.12E-94  | 0.86 |
| 30174 | 1946364 | 1946703 | 1.20E-14  | 0.82 |
| 30174 | 1962182 | 1962680 | 2.17E-51  | 0.93 |
| 30174 | 1963027 | 1963533 | 4.13E-14  | 0.78 |
| 30174 | 1969379 | 1969977 | 1.30E-10  | 0.76 |
| 30174 | 1979192 | 1979944 | 1.45E-42  | 0.83 |
| 30174 | 1982859 | 1983073 | 2.67E-33  | 0.8  |
| 30174 | 1989036 | 1989584 | 2.50E-12  | 0.78 |
| 30174 | 1989789 | 1990954 | 2.13E-62  | 0.86 |
| 30174 | 2046101 | 2046821 | 8.26E-43  | 0.83 |
| 30174 | 2048389 | 2049858 | 1.48E-66  | 0.89 |
| 30174 | 2051825 | 2053154 | 3.49E-50  | 0.79 |
| 30174 | 2061451 | 2062193 | 3.07E-57  | 0.9  |
| 30174 | 2112692 | 2114020 | 2.61E-68  | 0.74 |
| 30174 | 2115094 | 2116419 | 9.47E-71  | 0.9  |
| 30174 | 2123628 | 2124180 | 1.81E-15  | 0.68 |
| 30174 | 2161763 | 2162081 | 9.82E-27  | 0.88 |
| 30174 | 2165596 | 2165887 | 2.64E-15  | 0.77 |
| 30174 | 2186802 | 2187480 | 2.88E-40  | 0.87 |
| 30174 | 2228767 | 2229031 | 2.37E-18  | 0.84 |
| 30174 | 2274063 | 2274491 | 8.71E-22  | 0.79 |
| 30174 | 2281134 | 2282092 | 6.34E-20  | 0.63 |
| 30174 | 2285429 | 2285873 | 5.65E-32  | 0.75 |
| 30174 | 2289886 | 2290665 | 4.65E-22  | 0.81 |
| 30174 | 2309872 | 2310295 | 1.24E-10  | 0.79 |
| 30174 | 2311493 | 2311978 | 2.95E-21  | 0.89 |
| 30174 | 2316240 | 2316926 | 1.40E-50  | 0.88 |
| 30174 | 2332968 | 2333473 | 8.98E-18  | 0.82 |
| 30174 | 2344728 | 2345335 | 5.22E-13  | 0.77 |
| 30174 | 2346217 | 2346486 | 4.07E-24  | 0.96 |
| 30174 | 2365194 | 2365542 | 4.90E-20  | 0.77 |
| 30174 | 2366087 | 2366339 | 9.93E-37  | 0.87 |
| 30174 | 2367320 | 2367670 | 9.29E-36  | 0.94 |
| 30174 | 2367906 | 2369312 | 3.91E-66  | 0.73 |
| 30174 | 2372451 | 2372719 | 3.87E-13  | 0.85 |
| 30174 | 2390443 | 2391041 | 2.76E-110 | 0.93 |
| 30174 | 2391321 | 2392284 | 1.02E-132 | 0.95 |
| 30174 | 2394485 | 2395186 | 9.95E-35  | 0.84 |
| 30174 | 2409395 | 2409672 | 6.72E-26  | 0.92 |
| 30174 | 2425748 | 2425991 | 1.60E-14  | 0.8  |
| 30174 | 2426284 | 2426990 | 8.67E-46  | 0.77 |
| 30174 | 2431892 | 2433093 | 1.60E-50  | 0.86 |
| 30174 | 2439467 | 2440124 | 9.17E-32  | 0.84 |
| 30174 | 2442491 | 2443239 | 2.13E-32  | 0.92 |
| 30174 | 2443455 | 2443940 | 2.59E-40  | 0.9  |
| 30174 | 2444494 | 2445305 | 4.16E-31  | 0.73 |
| 30174 | 2467099 | 2467312 | 2.70E-09  | 0.72 |
| 30174 | 2486058 | 2486317 | 3.03E-21  | 0.87 |
| 30174 | 2487791 | 2488511 | 4.26E-20  | 0.87 |
| 30174 | 2491462 | 2491847 | 2.34E-11  | 0.82 |
| 30174 | 2493208 | 2494848 | 1.79E-102 | 0.94 |

|       |         |         |           |      |
|-------|---------|---------|-----------|------|
| 30174 | 2495893 | 2496405 | 7.98E-32  | 0.72 |
| 30174 | 2502604 | 2502983 | 4.96E-37  | 0.94 |
| 30174 | 2521602 | 2522128 | 4.63E-14  | 0.75 |
| 30174 | 2524977 | 2525679 | 1.16E-32  | 0.82 |
| 30174 | 2526112 | 2526611 | 6.19E-20  | 0.83 |
| 30174 | 2527945 | 2528468 | 8.70E-28  | 0.87 |
| 30174 | 2536106 | 2536945 | 1.08E-25  | 0.81 |
| 30174 | 2559394 | 2560213 | 1.13E-43  | 0.84 |
| 30174 | 2575211 | 2575872 | 5.38E-25  | 0.6  |
| 30174 | 2576138 | 2577059 | 1.03E-28  | 0.75 |
| 30174 | 2578044 | 2578496 | 7.15E-29  | 0.7  |
| 30174 | 2593018 | 2594404 | 4.66E-37  | 0.85 |
| 30174 | 2594612 | 2595405 | 7.75E-42  | 0.84 |
| 30174 | 2632224 | 2632633 | 1.22E-31  | 0.83 |
| 30174 | 2674033 | 2674456 | 8.61E-43  | 0.93 |
| 30174 | 2676223 | 2676504 | 7.88E-24  | 0.7  |
| 30174 | 2679784 | 2680131 | 1.18E-24  | 0.87 |
| 30174 | 2692323 | 2692530 | 3.71E-08  | 0.82 |
| 30174 | 2713655 | 2714379 | 5.52E-36  | 0.7  |
| 30174 | 2717649 | 2718257 | 2.00E-34  | 0.88 |
| 30174 | 2719087 | 2720026 | 2.39E-38  | 0.75 |
| 30174 | 2722252 | 2722536 | 3.25E-34  | 0.91 |
| 30174 | 2724906 | 2725283 | 1.19E-29  | 0.77 |
| 30174 | 2727810 | 2728423 | 5.76E-22  | 0.81 |
| 30174 | 2728882 | 2729131 | 1.37E-20  | 0.84 |
| 30174 | 2747482 | 2748149 | 3.36E-38  | 0.89 |
| 30174 | 2754044 | 2754860 | 8.67E-11  | 0.74 |
| 30174 | 2773998 | 2774514 | 4.99E-12  | 0.8  |
| 30174 | 2783361 | 2783863 | 2.17E-16  | 0.64 |
| 30174 | 2902609 | 2902955 | 7.06E-14  | 0.89 |
| 30174 | 2956037 | 2956545 | 2.45E-27  | 0.86 |
| 30174 | 2959176 | 2959580 | 5.86E-16  | 0.9  |
| 30174 | 2978995 | 2979741 | 2.67E-30  | 0.74 |
| 30174 | 3002984 | 3003222 | 2.32E-19  | 0.82 |
| 30174 | 3006953 | 3007693 | 3.43E-53  | 0.9  |
| 30174 | 3007906 | 3008306 | 2.19E-11  | 0.82 |
| 30174 | 3008555 | 3009313 | 2.95E-24  | 0.87 |
| 30174 | 3011516 | 3011890 | 7.73E-13  | 0.83 |
| 30174 | 3013010 | 3013332 | 1.56E-35  | 0.9  |
| 30174 | 3015572 | 3016589 | 1.31E-55  | 0.76 |
| 30174 | 3017752 | 3018046 | 1.69E-23  | 0.61 |
| 30174 | 3030290 | 3030611 | 1.44E-34  | 0.87 |
| 30174 | 3030839 | 3031340 | 7.49E-23  | 0.82 |
| 30174 | 3036939 | 3037609 | 3.91E-98  | 0.9  |
| 30174 | 3053252 | 3053574 | 3.94E-33  | 0.91 |
| 30174 | 3057241 | 3058412 | 1.07E-176 | 0.81 |
| 30174 | 3058671 | 3059814 | 1.13E-178 | 0.8  |
| 30174 | 3066361 | 3066781 | 1.88E-41  | 0.62 |
| 30174 | 3067065 | 3068756 | 1.10E-77  | 0.84 |
| 30174 | 3082667 | 3083109 | 3.48E-20  | 0.65 |
| 30174 | 3101177 | 3101452 | 2.45E-21  | 0.76 |
| 30174 | 3110037 | 3112217 | 1.66E-105 | 0.87 |
| 30174 | 3112521 | 3113064 | 4.57E-21  | 0.76 |

|       |         |         |           |      |
|-------|---------|---------|-----------|------|
| 30174 | 3118550 | 3118800 | 1.30E-11  | 0.72 |
| 30174 | 3131279 | 3131843 | 9.67E-20  | 0.82 |
| 30174 | 3136161 | 3136571 | 1.79E-11  | 0.72 |
| 30174 | 3155706 | 3155991 | 7.97E-12  | 0.82 |
| 30174 | 3156303 | 3156602 | 2.64E-15  | 0.79 |
| 30174 | 3156814 | 3158010 | 3.66E-75  | 0.66 |
| 30174 | 3160683 | 3161379 | 4.95E-77  | 0.83 |
| 30174 | 3163795 | 3164090 | 6.09E-15  | 0.76 |
| 30174 | 3179280 | 3179876 | 1.11E-27  | 0.6  |
| 30174 | 3263245 | 3264145 | 6.36E-43  | 0.8  |
| 30174 | 3289474 | 3290910 | 4.26E-40  | 0.62 |
| 30174 | 3300624 | 3301907 | 2.68E-47  | 0.69 |
| 30174 | 3304360 | 3304914 | 5.41E-28  | 0.79 |
| 30174 | 3305182 | 3305990 | 1.41E-94  | 0.88 |
| 30174 | 3319114 | 3319541 | 2.91E-17  | 0.75 |
| 30174 | 3333981 | 3335307 | 6.71E-46  | 0.65 |
| 30174 | 3336029 | 3336842 | 1.52E-149 | 0.93 |
| 30174 | 3337422 | 3338340 | 1.52E-111 | 0.88 |
| 30174 | 3343867 | 3344832 | 1.32E-49  | 0.88 |
| 30174 | 3345613 | 3345903 | 1.38E-23  | 0.96 |
| 30174 | 3351099 | 3351510 | 5.00E-18  | 0.8  |
| 30174 | 3355046 | 3355903 | 6.57E-27  | 0.64 |
| 30174 | 3365810 | 3366242 | 9.28E-17  | 0.84 |
| 30174 | 3366447 | 3367039 | 1.97E-23  | 0.85 |
| 30174 | 3369409 | 3369751 | 7.25E-17  | 0.79 |
| 30174 | 3386207 | 3387073 | 4.85E-77  | 0.85 |
| 30175 | 15009   | 15464   | 3.15E-07  | 0.95 |
| 30175 | 26212   | 26641   | 3.51E-06  | 0.93 |
| 30175 | 62576   | 63345   | 9.17E-08  | 0.83 |
| 30175 | 71715   | 72007   | 1.29E-04  | 0.8  |
| 30176 | 10410   | 10789   | 2.04E-06  | 0.85 |
| 30176 | 20480   | 20853   | 2.33E-07  | 0.9  |
| 30177 | 17477   | 17826   | 1.11E-04  | 0.81 |
| 30177 | 17509   | 17904   | 3.76E-06  | 0.8  |
| 30177 | 18596   | 18907   | 4.68E-04  | 0.82 |
| 30177 | 18719   | 19177   | 2.37E-06  | 0.89 |
| 30177 | 19650   | 19896   | 2.09E-11  | 0.83 |
| 30177 | 24871   | 25194   | 1.27E-05  | 0.9  |
| 30177 | 30400   | 30712   | 1.68E-08  | 0.8  |
| 30177 | 36382   | 36668   | 2.89E-11  | 0.91 |
| 30177 | 38047   | 38287   | 2.83E-08  | 0.87 |
| 30177 | 43279   | 43512   | 2.90E-06  | 0.86 |
| 30177 | 57627   | 57968   | 1.84E-11  | 0.77 |
| 30177 | 57630   | 58225   | 3.82E-12  | 0.83 |
| 30177 | 92263   | 92527   | 5.48E-12  | 0.83 |
| 30177 | 116868  | 117207  | 3.77E-06  | 0.8  |
| 30177 | 141179  | 141388  | 3.97E-07  | 0.87 |
| 30177 | 161608  | 162136  | 5.77E-52  | 0.89 |
| 30177 | 172940  | 173145  | 6.39E-09  | 0.76 |
| 30177 | 198962  | 199227  | 2.83E-14  | 0.88 |
| 30177 | 218745  | 218966  | 2.41E-08  | 0.89 |
| 30177 | 219040  | 219436  | 9.58E-12  | 0.89 |
| 30177 | 242862  | 243475  | 2.08E-10  | 0.8  |



|       |        |        |          |      |
|-------|--------|--------|----------|------|
| 30177 | 257198 | 257527 | 9.02E-11 | 0.91 |
| 30177 | 266818 | 267062 | 3.36E-27 | 0.94 |
| 30177 | 284497 | 284874 | 3.47E-06 | 0.92 |
| 30177 | 291251 | 291461 | 3.17E-07 | 0.92 |
| 30177 | 324518 | 324768 | 9.53E-04 | 1    |
| 30177 | 343853 | 344059 | 1.56E-04 | 0.94 |
| 30177 | 362889 | 363239 | 2.51E-06 | 0.88 |
| 30177 | 364892 | 365092 | 3.70E-18 | 0.81 |
| 30177 | 377483 | 377721 | 9.79E-12 | 0.8  |
| 30177 | 380071 | 380617 | 1.61E-28 | 0.81 |
| 30177 | 380097 | 380669 | 4.04E-31 | 0.81 |
| 30177 | 401886 | 402399 | 3.74E-07 | 0.93 |
| 30177 | 408172 | 408441 | 9.93E-74 | 0.93 |
| 30177 | 421502 | 421940 | 6.47E-06 | 0.83 |
| 30177 | 423427 | 423853 | 2.82E-11 | 0.94 |
| 30177 | 438205 | 438586 | 2.04E-06 | 0.96 |
| 30177 | 486129 | 486396 | 2.05E-05 | 0.74 |
| 30177 | 496459 | 496734 | 2.86E-07 | 0.75 |
| 30177 | 508811 | 509098 | 2.19E-07 | 0.92 |
| 30177 | 583906 | 584214 | 3.70E-34 | 0.86 |
| 30177 | 594637 | 594969 | 1.50E-25 | 0.79 |
| 30177 | 594657 | 595021 | 1.47E-31 | 0.82 |
| 30177 | 659909 | 660497 | 5.53E-10 | 0.8  |
| 30177 | 670107 | 670479 | 6.05E-09 | 0.96 |
| 30177 | 673324 | 674264 | 1.19E-05 | 0.9  |
| 30177 | 702949 | 703319 | 1.09E-25 | 0.78 |
| 30177 | 720022 | 720263 | 1.26E-25 | 0.92 |
| 30177 | 760301 | 760893 | 1.73E-18 | 0.81 |
| 30177 | 766429 | 766701 | 4.63E-16 | 0.86 |
| 30177 | 781421 | 781735 | 2.49E-18 | 0.84 |
| 30178 | 17711  | 18028  | 2.07E-17 | 0.82 |
| 30178 | 23545  | 24828  | 1.95E-33 | 0.75 |
| 30178 | 27717  | 28316  | 6.07E-29 | 0.86 |
| 30178 | 28636  | 29453  | 1.08E-42 | 0.88 |
| 30178 | 122901 | 123807 | 3.49E-37 | 0.81 |
| 30178 | 129303 | 130036 | 4.53E-29 | 0.6  |
| 30178 | 132194 | 132452 | 2.03E-13 | 0.72 |
| 30178 | 138610 | 139430 | 3.03E-45 | 0.86 |
| 30178 | 152108 | 152765 | 3.08E-34 | 0.76 |
| 30178 | 157256 | 158005 | 2.08E-27 | 0.81 |
| 30178 | 157515 | 158034 | 4.15E-21 | 0.79 |
| 30178 | 189168 | 189952 | 4.03E-73 | 0.85 |
| 30178 | 208186 | 208642 | 3.00E-25 | 0.78 |
| 30178 | 228368 | 229076 | 3.63E-26 | 0.92 |
| 30178 | 276355 | 276992 | 1.67E-39 | 0.74 |
| 30178 | 301265 | 301503 | 1.47E-23 | 0.86 |
| 30179 | 66     | 811    | 7.56E-23 | 0.64 |
| 30179 | 32154  | 32757  | 7.58E-40 | 0.9  |
| 30179 | 33984  | 34431  | 2.53E-14 | 0.87 |
| 30179 | 86461  | 87006  | 2.46E-19 | 0.8  |
| 30179 | 94983  | 95369  | 2.21E-07 | 0.66 |
| 30179 | 96867  | 97230  | 1.81E-30 | 0.85 |
| 30179 | 99181  | 99468  | 1.26E-38 | 0.88 |

|       |        |        |           |      |
|-------|--------|--------|-----------|------|
| 30179 | 99680  | 99970  | 3.60E-36  | 0.96 |
| 30179 | 103698 | 104527 | 1.30E-48  | 0.79 |
| 30179 | 190139 | 190917 | 1.05E-57  | 0.93 |
| 30179 | 206323 | 206526 | 1.58E-13  | 0.96 |
| 30179 | 217362 | 218320 | 1.52E-30  | 0.64 |
| 30179 | 286825 | 287322 | 2.69E-23  | 0.72 |
| 30179 | 297383 | 297740 | 1.93E-15  | 0.73 |
| 30179 | 299551 | 300046 | 1.63E-15  | 0.79 |
| 30179 | 300477 | 300960 | 8.21E-15  | 0.78 |
| 30179 | 301371 | 301782 | 1.04E-18  | 0.88 |
| 30179 | 307277 | 308276 | 9.20E-36  | 0.66 |
| 30179 | 309487 | 309745 | 4.09E-25  | 0.73 |
| 30180 | 6121   | 7082   | 3.42E-75  | 0.95 |
| 30180 | 9021   | 9367   | 7.27E-11  | 0.9  |
| 30180 | 44090  | 44724  | 4.25E-25  | 0.71 |
| 30180 | 46489  | 46783  | 3.22E-11  | 0.87 |
| 30180 | 90452  | 90883  | 2.09E-14  | 0.83 |
| 30180 | 118526 | 118845 | 3.64E-33  | 0.89 |
| 30180 | 134598 | 135206 | 5.60E-25  | 0.87 |
| 30180 | 162633 | 163308 | 7.43E-06  | 0.93 |
| 30180 | 208976 | 209447 | 4.27E-06  | 0.92 |
| 30180 | 223758 | 224252 | 2.55E-24  | 0.83 |
| 30180 | 232996 | 233397 | 3.69E-30  | 0.95 |
| 30180 | 233653 | 233991 | 4.53E-36  | 0.96 |
| 30180 | 235318 | 235588 | 1.73E-35  | 0.88 |
| 30180 | 236101 | 236436 | 5.03E-22  | 0.97 |
| 30180 | 242316 | 242988 | 9.53E-95  | 0.85 |
| 30180 | 259332 | 259538 | 4.60E-13  | 0.83 |
| 30180 | 288134 | 289263 | 4.18E-36  | 0.74 |
| 30180 | 294101 | 294480 | 3.73E-36  | 0.95 |
| 30180 | 296829 | 298573 | 4.43E-49  | 0.83 |
| 30180 | 298783 | 299224 | 6.24E-30  | 0.91 |
| 30180 | 348391 | 349136 | 5.82E-20  | 0.73 |
| 30180 | 349387 | 350236 | 5.52E-102 | 0.84 |
| 30180 | 356249 | 357127 | 6.84E-82  | 0.95 |
| 30180 | 362433 | 363006 | 1.02E-32  | 0.64 |
| 30180 | 365701 | 366148 | 1.39E-54  | 0.93 |
| 30180 | 366754 | 367801 | 5.89E-76  | 0.95 |
| 30180 | 369025 | 369790 | 1.00E-49  | 0.62 |
| 30180 | 376650 | 377268 | 1.28E-41  | 0.96 |
| 30180 | 390087 | 391198 | 3.89E-73  | 0.96 |
| 30180 | 405232 | 405437 | 2.62E-17  | 0.8  |
| 30180 | 424104 | 424524 | 4.29E-41  | 0.88 |
| 30180 | 425129 | 426022 | 1.13E-17  | 0.6  |
| 30180 | 431056 | 431478 | 1.31E-23  | 0.93 |
| 30180 | 432014 | 433212 | 2.71E-73  | 0.92 |
| 30180 | 433899 | 434460 | 5.96E-52  | 0.85 |
| 30180 | 434901 | 435256 | 2.31E-10  | 0.87 |
| 30180 | 447427 | 448080 | 7.81E-21  | 0.74 |
| 30180 | 499614 | 500598 | 4.96E-73  | 0.89 |
| 30180 | 500922 | 501185 | 3.40E-27  | 0.87 |
| 30180 | 545690 | 546655 | 1.26E-17  | 0.68 |
| 30180 | 553282 | 553723 | 3.41E-24  | 0.8  |

|       |         |         |           |      |
|-------|---------|---------|-----------|------|
| 30180 | 554348  | 555009  | 3.29E-50  | 0.87 |
| 30180 | 623895  | 624233  | 3.00E-34  | 0.84 |
| 30180 | 624458  | 625683  | 8.68E-94  | 0.69 |
| 30180 | 672088  | 672390  | 1.42E-23  | 0.81 |
| 30180 | 701155  | 701394  | 8.44E-11  | 0.98 |
| 30180 | 727818  | 728365  | 6.53E-16  | 0.93 |
| 30180 | 748250  | 748554  | 1.27E-09  | 0.68 |
| 30180 | 872114  | 872847  | 2.40E-22  | 0.82 |
| 30180 | 873159  | 873686  | 1.77E-22  | 0.79 |
| 30180 | 875667  | 875993  | 9.12E-22  | 0.87 |
| 30180 | 877089  | 878229  | 1.24E-41  | 0.86 |
| 30180 | 898085  | 898363  | 3.24E-33  | 0.95 |
| 30180 | 935507  | 935725  | 9.11E-24  | 0.81 |
| 30180 | 938629  | 939240  | 6.80E-36  | 0.71 |
| 30180 | 996467  | 996826  | 7.38E-19  | 0.88 |
| 30180 | 1004497 | 1004705 | 1.16E-14  | 0.9  |
| 30180 | 1035452 | 1035827 | 8.08E-51  | 0.73 |
| 30180 | 1036087 | 1036735 | 5.21E-116 | 0.9  |
| 30180 | 1036980 | 1037500 | 2.94E-87  | 0.92 |
| 30180 | 1038742 | 1039296 | 1.08E-28  | 0.88 |
| 30180 | 1054927 | 1055159 | 7.77E-40  | 0.96 |
| 30180 | 1055739 | 1056276 | 4.74E-43  | 0.97 |
| 30180 | 1071441 | 1071690 | 5.23E-22  | 0.88 |
| 30180 | 1072341 | 1072615 | 4.89E-63  | 0.94 |
| 30180 | 1118320 | 1118667 | 2.38E-46  | 0.98 |
| 30180 | 1119355 | 1119897 | 8.89E-41  | 0.93 |
| 30180 | 1134719 | 1135065 | 2.35E-24  | 0.76 |
| 30180 | 1169245 | 1170121 | 2.23E-28  | 0.79 |
| 30180 | 1173963 | 1174408 | 2.95E-66  | 0.93 |
| 30180 | 1184206 | 1184600 | 3.27E-35  | 0.91 |
| 30180 | 1210145 | 1210852 | 6.90E-43  | 0.96 |
| 30180 | 1211598 | 1212040 | 1.52E-20  | 0.93 |
| 30180 | 1212946 | 1213287 | 5.76E-43  | 0.96 |
| 30181 | 14907   | 15768   | 2.97E-12  | 0.89 |
| 30181 | 15561   | 15909   | 7.09E-06  | 0.79 |
| 30181 | 73044   | 73372   | 2.60E-05  | 0.85 |
| 30181 | 106910  | 107413  | 3.04E-13  | 0.79 |
| 30181 | 146098  | 146307  | 1.39E-02  | 0.38 |
| 30181 | 207233  | 207529  | 2.14E-21  | 0.92 |
| 30181 | 307839  | 308077  | 1.09E-09  | 0.93 |
| 30181 | 314091  | 314483  | 9.61E-17  | 0.91 |
| 30181 | 401188  | 401719  | 5.05E-05  | 0.77 |
| 30181 | 429608  | 429816  | 4.15E-06  | 0.88 |
| 30181 | 513011  | 513457  | 3.76E-19  | 0.98 |
| 30181 | 513738  | 514032  | 2.90E-07  | 0.74 |
| 30181 | 525992  | 526253  | 5.85E-12  | 0.95 |
| 30181 | 534113  | 534482  | 4.09E-12  | 0.87 |
| 30181 | 674515  | 674745  | 1.03E-07  | 0.92 |
| 30181 | 692417  | 693029  | 4.97E-15  | 0.87 |
| 30181 | 693341  | 693701  | 1.33E-09  | 0.83 |
| 30181 | 709282  | 709652  | 7.15E-11  | 0.98 |
| 30181 | 715175  | 715505  | 2.32E-13  | 0.69 |
| 30181 | 739271  | 739787  | 2.39E-32  | 0.9  |

|       |         |         |           |      |
|-------|---------|---------|-----------|------|
| 30181 | 742677  | 742944  | 1.82E-10  | 0.85 |
| 30181 | 757914  | 758190  | 2.24E-11  | 0.92 |
| 30181 | 795829  | 796160  | 2.50E-07  | 0.95 |
| 30181 | 799477  | 800222  | 4.43E-10  | 0.88 |
| 30181 | 803245  | 803630  | 6.92E-11  | 0.88 |
| 30181 | 809698  | 810010  | 2.89E-07  | 0.96 |
| 30181 | 840117  | 840412  | 1.40E-09  | 0.8  |
| 30181 | 880276  | 880491  | 1.19E-08  | 0.91 |
| 30181 | 917554  | 918394  | 2.12E-13  | 0.96 |
| 30181 | 1019138 | 1019439 | 4.46E-07  | 0.87 |
| 30181 | 1027309 | 1027742 | 1.31E-05  | 0.77 |
| 30181 | 1046073 | 1046386 | 5.58E-08  | 0.81 |
| 30181 | 1095825 | 1096093 | 1.65E-05  | 0.8  |
| 30181 | 1123868 | 1124411 | 6.27E-17  | 0.91 |
| 30181 | 1154120 | 1154349 | 4.82E-08  | 0.81 |
| 30181 | 1154742 | 1155050 | 8.82E-13  | 0.83 |
| 30181 | 1211283 | 1211652 | 5.96E-09  | 0.88 |
| 30181 | 1215888 | 1216499 | 3.15E-11  | 0.83 |
| 30181 | 1242231 | 1242502 | 1.49E-05  | 0.89 |
| 30181 | 1326311 | 1326855 | 3.08E-13  | 0.83 |
| 30181 | 1327597 | 1327826 | 8.33E-11  | 0.88 |
| 30181 | 1350590 | 1350798 | 1.22E-09  | 0.8  |
| 30181 | 1372443 | 1372726 | 3.61E-17  | 0.97 |
| 30181 | 1377220 | 1377619 | 3.66E-05  | 0.77 |
| 30181 | 1382137 | 1382437 | 2.09E-06  | 0.89 |
| 30181 | 1405397 | 1405771 | 1.63E-11  | 0.84 |
| 30181 | 1428760 | 1429392 | 6.01E-08  | 0.93 |
| 30181 | 1444931 | 1445172 | 1.76E-15  | 0.88 |
| 30181 | 1478298 | 1478570 | 2.40E-05  | 0.8  |
| 30181 | 1499194 | 1499502 | 4.72E-13  | 0.95 |
| 30181 | 1521629 | 1522251 | 7.34E-60  | 0.94 |
| 30181 | 1539063 | 1539320 | 1.36E-15  | 0.86 |
| 30181 | 1562381 | 1562722 | 6.19E-09  | 0.85 |
| 30181 | 1586658 | 1587756 | 4.80E-18  | 0.78 |
| 30181 | 1588038 | 1588988 | 7.34E-46  | 0.94 |
| 30181 | 1589430 | 1589740 | 1.27E-18  | 0.87 |
| 30181 | 1600116 | 1600405 | 7.81E-56  | 0.92 |
| 30182 | 6845    | 7314    | 1.55E-29  | 0.71 |
| 30182 | 7615    | 8065    | 3.13E-26  | 0.93 |
| 30182 | 8282    | 8558    | 2.39E-17  | 0.94 |
| 30182 | 9054    | 10016   | 1.63E-42  | 0.9  |
| 30182 | 26739   | 27147   | 1.34E-24  | 0.89 |
| 30182 | 28293   | 28714   | 6.39E-128 | 0.92 |
| 30182 | 31734   | 32278   | 5.07E-19  | 0.78 |
| 30182 | 48338   | 48610   | 2.65E-19  | 0.82 |
| 30182 | 78205   | 78591   | 9.13E-25  | 0.75 |
| 30182 | 79534   | 79928   | 7.25E-25  | 0.82 |
| 30182 | 92988   | 94832   | 3.35E-79  | 0.83 |
| 30182 | 107148  | 107764  | 1.21E-28  | 0.96 |
| 30183 | 26186   | 26543   | 2.25E-10  | 0.88 |
| 30183 | 35143   | 35612   | 3.10E-25  | 0.8  |
| 30183 | 44950   | 45382   | 2.12E-24  | 0.82 |
| 30183 | 57526   | 57966   | 1.09E-24  | 0.8  |

|       |         |         |           |      |
|-------|---------|---------|-----------|------|
| 30183 | 58261   | 58713   | 7.67E-24  | 0.77 |
| 30183 | 95923   | 96222   | 7.18E-04  | 0.79 |
| 30183 | 99192   | 99794   | 8.53E-12  | 0.9  |
| 30183 | 128911  | 129230  | 2.71E-35  | 0.93 |
| 30183 | 139630  | 139876  | 1.39E-41  | 0.94 |
| 30183 | 151754  | 151967  | 3.58E-14  | 0.93 |
| 30183 | 179650  | 179898  | 3.56E-11  | 0.76 |
| 30183 | 180755  | 181341  | 1.70E-52  | 0.93 |
| 30183 | 184660  | 185272  | 7.86E-45  | 0.93 |
| 30183 | 188289  | 188672  | 3.26E-09  | 0.82 |
| 30183 | 192620  | 192932  | 4.87E-19  | 0.94 |
| 30183 | 194350  | 194768  | 2.18E-26  | 0.9  |
| 30183 | 200579  | 200812  | 1.31E-14  | 0.78 |
| 30183 | 293524  | 293768  | 2.38E-29  | 0.95 |
| 30183 | 310109  | 310341  | 5.48E-09  | 0.89 |
| 30183 | 311502  | 313082  | 6.62E-176 | 0.94 |
| 30183 | 313876  | 314718  | 1.99E-60  | 0.96 |
| 30183 | 319223  | 319609  | 4.94E-21  | 0.95 |
| 30183 | 320787  | 321017  | 1.01E-26  | 0.92 |
| 30183 | 331529  | 332164  | 1.52E-49  | 0.95 |
| 30183 | 333164  | 333616  | 1.59E-67  | 0.95 |
| 30183 | 352891  | 353097  | 6.10E-21  | 0.9  |
| 30183 | 376646  | 377488  | 5.64E-30  | 0.88 |
| 30183 | 384531  | 384943  | 2.88E-44  | 0.74 |
| 30183 | 393940  | 394747  | 1.58E-21  | 0.79 |
| 30183 | 395743  | 396949  | 1.29E-58  | 0.93 |
| 30183 | 397319  | 397920  | 4.33E-45  | 0.96 |
| 30183 | 435767  | 436469  | 1.07E-57  | 0.96 |
| 30183 | 464550  | 464752  | 4.25E-19  | 0.87 |
| 30183 | 579473  | 579688  | 2.40E-10  | 0.84 |
| 30183 | 611345  | 611786  | 2.67E-30  | 0.89 |
| 30183 | 612894  | 613175  | 4.01E-25  | 0.9  |
| 30183 | 619571  | 619989  | 1.56E-06  | 0.69 |
| 30183 | 628028  | 629043  | 8.66E-20  | 0.73 |
| 30183 | 632484  | 633260  | 3.48E-38  | 0.9  |
| 30183 | 639919  | 640455  | 9.19E-32  | 0.86 |
| 30183 | 643477  | 643765  | 2.55E-31  | 0.94 |
| 30183 | 663999  | 664675  | 4.79E-36  | 0.89 |
| 30183 | 676759  | 677113  | 2.90E-06  | 1    |
| 30183 | 689508  | 689806  | 4.44E-07  | 0.77 |
| 30183 | 742605  | 742876  | 5.93E-03  | 0.82 |
| 30183 | 799320  | 799594  | 3.35E-04  | 0.8  |
| 30183 | 872211  | 872503  | 9.67E-04  | 0.79 |
| 30183 | 881430  | 881725  | 3.60E-08  | 0.91 |
| 30183 | 962694  | 963441  | 3.98E-42  | 0.67 |
| 30183 | 967476  | 968272  | 4.72E-56  | 0.9  |
| 30183 | 1005140 | 1005343 | 1.11E-35  | 0.97 |
| 30183 | 1007626 | 1008647 | 6.97E-90  | 0.93 |
| 30183 | 1010931 | 1011544 | 9.66E-22  | 0.9  |
| 30183 | 1013830 | 1014481 | 6.31E-22  | 0.84 |
| 30183 | 1022932 | 1023460 | 1.45E-17  | 0.73 |
| 30183 | 1031928 | 1032160 | 1.24E-11  | 0.82 |
| 30183 | 1041260 | 1041858 | 5.54E-41  | 0.94 |

|       |         |         |           |      |
|-------|---------|---------|-----------|------|
| 30183 | 1047933 | 1048282 | 3.99E-09  | 0.84 |
| 30183 | 1053642 | 1053940 | 6.82E-39  | 0.98 |
| 30183 | 1071583 | 1072390 | 3.37E-30  | 0.94 |
| 30183 | 1127719 | 1128067 | 1.88E-27  | 0.89 |
| 30183 | 1151551 | 1151922 | 8.99E-09  | 0.83 |
| 30183 | 1151706 | 1151939 | 2.06E-07  | 0.81 |
| 30183 | 1184971 | 1185240 | 5.86E-09  | 0.78 |
| 30183 | 1185017 | 1185313 | 9.20E-11  | 0.79 |
| 30183 | 1192162 | 1192988 | 4.66E-33  | 0.83 |
| 30183 | 1199192 | 1199541 | 6.05E-07  | 0.87 |
| 30183 | 1210393 | 1210770 | 1.12E-05  | 0.86 |
| 30183 | 1238170 | 1238379 | 4.44E-07  | 0.85 |
| 30183 | 1255574 | 1255802 | 7.82E-13  | 0.83 |
| 30183 | 1314940 | 1315556 | 4.50E-28  | 0.83 |
| 30184 | 515216  | 515990  | 3.83E-58  | 0.87 |
| 30184 | 536658  | 537049  | 1.97E-25  | 0.7  |
| 30184 | 537360  | 537760  | 1.17E-14  | 0.86 |
| 30184 | 576384  | 577402  | 3.18E-40  | 0.93 |
| 30184 | 625648  | 626706  | 5.28E-156 | 0.98 |
| 30184 | 633038  | 633488  | 1.81E-67  | 0.93 |
| 30184 | 721781  | 722187  | 7.18E-17  | 0.93 |
| 30184 | 733515  | 734274  | 1.12E-36  | 0.86 |
| 30184 | 813017  | 813232  | 2.26E-27  | 0.98 |
| 30184 | 824390  | 825192  | 2.11E-24  | 0.62 |
| 30184 | 833342  | 833776  | 6.17E-14  | 0.9  |
| 30184 | 898110  | 898452  | 2.26E-52  | 0.96 |
| 30185 | 20199   | 20727   | 6.42E-15  | 0.72 |
| 30185 | 24060   | 24782   | 8.22E-05  | 0.72 |
| 30185 | 27493   | 28328   | 2.43E-14  | 0.65 |
| 30185 | 43331   | 44749   | 6.46E-27  | 0.81 |
| 30185 | 52474   | 52785   | 5.75E-11  | 0.63 |
| 30185 | 53081   | 53737   | 4.07E-18  | 0.7  |
| 30185 | 64620   | 64959   | 1.65E-12  | 0.78 |
| 30185 | 64652   | 65007   | 3.32E-12  | 0.77 |
| 30185 | 74110   | 74530   | 2.21E-10  | 0.82 |
| 30185 | 81474   | 81745   | 3.20E-09  | 0.73 |
| 30185 | 101418  | 101772  | 7.64E-07  | 0.74 |
| 30185 | 103377  | 103617  | 3.82E-15  | 0.85 |
| 30185 | 115547  | 115858  | 4.47E-11  | 0.77 |
| 30185 | 123500  | 123843  | 2.14E-12  | 0.86 |
| 30185 | 129748  | 130002  | 3.73E-07  | 0.83 |
| 30185 | 134587  | 135233  | 3.12E-20  | 0.79 |
| 30185 | 140163  | 141318  | 4.98E-75  | 0.83 |
| 30185 | 142063  | 142831  | 1.95E-22  | 0.79 |
| 30185 | 151123  | 151603  | 3.91E-20  | 0.79 |
| 30185 | 151287  | 151724  | 1.07E-14  | 0.79 |
| 30185 | 171541  | 171776  | 1.99E-13  | 0.84 |
| 30185 | 191839  | 192267  | 1.24E-19  | 0.79 |
| 30185 | 209735  | 210143  | 5.93E-09  | 0.67 |
| 30185 | 219735  | 220057  | 1.46E-07  | 0.88 |
| 30185 | 277773  | 278478  | 2.61E-08  | 0.94 |
| 30185 | 370605  | 371247  | 4.35E-62  | 0.97 |
| 30185 | 372848  | 373327  | 1.75E-30  | 0.94 |

|       |        |        |           |      |
|-------|--------|--------|-----------|------|
| 30185 | 378220 | 378612 | 8.61E-45  | 0.97 |
| 30185 | 385166 | 385667 | 9.14E-36  | 0.97 |
| 30185 | 386016 | 386475 | 4.87E-44  | 0.95 |
| 30185 | 397485 | 398084 | 6.58E-93  | 0.94 |
| 30185 | 400233 | 401038 | 2.48E-68  | 0.96 |
| 30185 | 401251 | 401582 | 1.69E-43  | 0.97 |
| 30185 | 404852 | 405988 | 8.40E-100 | 0.94 |
| 30185 | 406201 | 406864 | 4.18E-22  | 0.81 |
| 30185 | 446083 | 447092 | 1.12E-59  | 0.63 |
| 30185 | 471130 | 471429 | 3.79E-06  | 0.83 |
| 30185 | 471149 | 471472 | 4.84E-06  | 0.83 |
| 30185 | 682307 | 682920 | 7.14E-22  | 0.69 |
| 30185 | 754791 | 755047 | 9.59E-20  | 0.9  |
| 30185 | 756463 | 756856 | 1.77E-29  | 0.92 |
| 30185 | 757123 | 758292 | 1.79E-35  | 0.82 |
| 30185 | 772568 | 772783 | 1.78E-13  | 0.9  |
| 30185 | 798275 | 798810 | 5.21E-30  | 0.97 |
| 30185 | 799112 | 799703 | 2.68E-72  | 0.94 |
| 30185 | 814780 | 815370 | 7.08E-28  | 0.72 |
| 30185 | 822572 | 823020 | 1.46E-22  | 0.82 |
| 30185 | 823233 | 823916 | 5.89E-54  | 0.81 |
| 30185 | 839847 | 840312 | 7.01E-18  | 0.64 |
| 30185 | 874925 | 875383 | 1.49E-21  | 0.96 |
| 30185 | 875612 | 876359 | 3.18E-31  | 0.78 |
| 30185 | 882689 | 884976 | 2.33E-75  | 0.7  |
| 30185 | 892650 | 893177 | 6.21E-67  | 0.92 |
| 30186 | 133198 | 133720 | 8.50E-08  | 0.91 |
| 30186 | 151399 | 151600 | 5.20E-09  | 0.9  |
| 30186 | 155873 | 156099 | 3.54E-07  | 0.9  |
| 30186 | 158628 | 158931 | 8.60E-07  | 0.84 |
| 30186 | 169530 | 169798 | 1.80E-05  | 0.93 |
| 30186 | 193683 | 194069 | 2.86E-06  | 0.78 |
| 30186 | 235292 | 235865 | 1.55E-12  | 0.84 |
| 30186 | 238136 | 238440 | 3.82E-05  | 0.94 |
| 30186 | 241517 | 241747 | 4.72E-04  | 0.86 |
| 30186 | 242174 | 242484 | 2.70E-19  | 0.85 |
| 30186 | 242516 | 242722 | 3.17E-05  | 0.86 |
| 30186 | 251446 | 251836 | 2.86E-10  | 0.86 |
| 30186 | 281385 | 281791 | 2.02E-07  | 0.93 |
| 30186 | 284422 | 285539 | 3.38E-27  | 0.64 |
| 30186 | 409479 | 410328 | 2.01E-26  | 0.8  |
| 30186 | 410355 | 410630 | 8.31E-09  | 0.76 |
| 30186 | 471155 | 471753 | 3.16E-44  | 0.94 |
| 30186 | 520681 | 520922 | 4.30E-81  | 0.97 |
| 30186 | 523482 | 524245 | 5.03E-32  | 0.62 |
| 30186 | 524612 | 524955 | 6.40E-13  | 0.88 |
| 30186 | 640671 | 640966 | 4.11E-05  | 1    |
| 30186 | 684239 | 684679 | 8.74E-10  | 1    |
| 30186 | 791370 | 791699 | 4.82E-28  | 0.95 |
| 30186 | 791998 | 792473 | 3.34E-30  | 0.93 |
| 30186 | 794396 | 795106 | 1.18E-68  | 0.94 |
| 30186 | 812763 | 813235 | 7.31E-37  | 0.91 |
| 30186 | 872238 | 872605 | 1.50E-05  | 0.9  |

|       |         |         |          |      |
|-------|---------|---------|----------|------|
| 30186 | 893647  | 893920  | 1.79E-07 | 0.97 |
| 30186 | 894122  | 894938  | 2.34E-34 | 0.61 |
| 30186 | 902140  | 902674  | 2.15E-70 | 0.96 |
| 30186 | 918452  | 918781  | 1.70E-25 | 0.88 |
| 30186 | 922271  | 922932  | 4.01E-15 | 0.89 |
| 30186 | 927939  | 928617  | 7.22E-22 | 0.82 |
| 30186 | 931209  | 931608  | 6.96E-15 | 0.84 |
| 30186 | 933283  | 933957  | 4.09E-29 | 0.88 |
| 30186 | 990896  | 991212  | 2.95E-13 | 0.78 |
| 30186 | 993202  | 993437  | 2.10E-05 | 0.81 |
| 30186 | 1004989 | 1005199 | 2.30E-11 | 0.91 |
| 30186 | 1016915 | 1017226 | 6.26E-47 | 0.97 |
| 30186 | 1018788 | 1019308 | 1.27E-36 | 0.95 |
| 30186 | 1036482 | 1037077 | 3.50E-27 | 0.92 |
| 30186 | 1039452 | 1040183 | 1.47E-33 | 0.64 |
| 30186 | 1118718 | 1119394 | 3.38E-84 | 0.89 |
| 30186 | 1132113 | 1132474 | 3.88E-08 | 0.79 |
| 30186 | 1134330 | 1135942 | 2.03E-88 | 0.83 |
| 30186 | 1177607 | 1177995 | 5.77E-10 | 0.85 |
| 30186 | 1223315 | 1223608 | 1.19E-12 | 0.91 |
| 30186 | 1260517 | 1260720 | 4.14E-05 | 0.73 |
| 30186 | 1312084 | 1313185 | 4.64E-43 | 0.88 |
| 30186 | 1316918 | 1317289 | 8.78E-29 | 0.96 |
| 30187 | 56780   | 57043   | 7.69E-05 | 1    |
| 30187 | 79966   | 80259   | 2.00E-16 | 0.84 |
| 30187 | 140819  | 141393  | 1.00E-30 | 0.96 |
| 30188 | 12124   | 12478   | 2.47E-05 | 0.84 |
| 30188 | 61238   | 61670   | 1.87E-03 | 0.91 |
| 30188 | 96880   | 97317   | 3.21E-05 | 0.85 |
| 30188 | 112571  | 112939  | 4.05E-05 | 0.86 |
| 30188 | 128603  | 128881  | 1.17E-06 | 0.8  |
| 30188 | 138335  | 138606  | 6.98E-12 | 0.95 |
| 30188 | 142584  | 143018  | 3.51E-30 | 0.93 |
| 30188 | 144113  | 144732  | 2.23E-07 | 0.71 |
| 30188 | 191832  | 192089  | 1.43E-03 | 0.83 |
| 30189 | 97718   | 98025   | 2.48E-13 | 0.91 |
| 30189 | 104137  | 104486  | 2.08E-24 | 0.79 |
| 30189 | 105299  | 105704  | 1.98E-08 | 0.86 |
| 30189 | 107911  | 108494  | 2.95E-43 | 0.91 |
| 30189 | 126595  | 126798  | 5.12E-09 | 0.78 |
| 30189 | 144799  | 145098  | 1.80E-06 | 0.91 |
| 30189 | 174909  | 175306  | 1.06E-17 | 0.92 |
| 30189 | 222715  | 222995  | 1.44E-15 | 0.91 |
| 30189 | 272997  | 273515  | 7.68E-23 | 0.82 |
| 30189 | 277765  | 277973  | 1.20E-10 | 0.77 |
| 30189 | 282946  | 283218  | 1.24E-12 | 0.97 |
| 30189 | 283517  | 284240  | 7.60E-42 | 0.9  |
| 30189 | 284506  | 284782  | 1.69E-26 | 0.93 |
| 30189 | 285196  | 285492  | 5.44E-27 | 0.91 |
| 30189 | 286107  | 286379  | 8.76E-33 | 0.93 |
| 30189 | 308760  | 309192  | 6.83E-45 | 0.91 |
| 30189 | 310996  | 311576  | 2.26E-46 | 0.88 |
| 30189 | 312603  | 312939  | 1.52E-36 | 0.97 |



|       |         |         |           |      |
|-------|---------|---------|-----------|------|
| 30189 | 365403  | 365698  | 5.62E-49  | 0.85 |
| 30189 | 422217  | 422680  | 1.14E-34  | 0.84 |
| 30189 | 423332  | 424276  | 3.61E-89  | 0.93 |
| 30189 | 494036  | 494704  | 3.11E-15  | 0.74 |
| 30189 | 523912  | 524300  | 1.19E-30  | 0.94 |
| 30189 | 525501  | 526673  | 2.74E-48  | 0.95 |
| 30189 | 541307  | 542428  | 8.36E-78  | 0.81 |
| 30189 | 542695  | 543162  | 1.72E-22  | 0.76 |
| 30189 | 612202  | 613667  | 8.32E-62  | 0.8  |
| 30189 | 615006  | 615232  | 6.06E-21  | 0.91 |
| 30189 | 627620  | 628155  | 1.10E-26  | 0.79 |
| 30189 | 683957  | 684626  | 3.23E-38  | 0.85 |
| 30189 | 747703  | 748002  | 2.15E-67  | 0.97 |
| 30189 | 748528  | 749311  | 1.72E-27  | 0.94 |
| 30189 | 860509  | 860891  | 1.68E-18  | 0.95 |
| 30189 | 892222  | 892627  | 1.30E-19  | 0.84 |
| 30189 | 894030  | 894425  | 3.90E-86  | 0.92 |
| 30189 | 894872  | 895245  | 2.71E-20  | 0.92 |
| 30189 | 895543  | 895747  | 4.31E-29  | 0.93 |
| 30189 | 896916  | 897162  | 3.02E-34  | 0.95 |
| 30189 | 897477  | 898793  | 1.57E-108 | 0.83 |
| 30189 | 899043  | 899691  | 1.62E-31  | 0.91 |
| 30189 | 900574  | 901150  | 1.50E-72  | 0.91 |
| 30189 | 901565  | 902445  | 1.05E-87  | 0.93 |
| 30189 | 911030  | 911452  | 2.90E-09  | 0.78 |
| 30189 | 919839  | 920257  | 1.66E-15  | 0.84 |
| 30189 | 920624  | 921469  | 5.46E-39  | 0.79 |
| 30189 | 922230  | 922737  | 4.11E-31  | 0.89 |
| 30189 | 931635  | 932035  | 1.11E-22  | 0.93 |
| 30189 | 955945  | 956628  | 1.09E-37  | 0.95 |
| 30189 | 957137  | 957634  | 2.34E-33  | 0.92 |
| 30189 | 957966  | 958365  | 9.84E-42  | 0.89 |
| 30189 | 958778  | 959350  | 1.08E-38  | 0.94 |
| 30189 | 1044085 | 1044437 | 1.82E-05  | 0.93 |
| 30189 | 1077413 | 1077730 | 4.00E-89  | 0.9  |
| 30189 | 1091470 | 1091763 | 4.74E-12  | 0.9  |
| 30189 | 1133246 | 1133516 | 8.14E-26  | 0.88 |
| 30189 | 1136938 | 1137491 | 1.55E-26  | 0.82 |
| 30189 | 1172913 | 1173629 | 1.56E-51  | 0.62 |
| 30189 | 1174740 | 1175427 | 6.21E-61  | 0.83 |
| 30189 | 1304309 | 1304646 | 2.47E-24  | 0.8  |
| 30189 | 1405502 | 1405826 | 3.11E-06  | 0.84 |
| 30189 | 1447951 | 1448505 | 2.99E-05  | 0.86 |
| 30189 | 1511294 | 1511994 | 5.69E-10  | 0.79 |
| 30189 | 1516869 | 1517777 | 2.93E-84  | 0.96 |
| 30189 | 1518598 | 1520100 | 3.95E-104 | 0.94 |
| 30189 | 1544167 | 1544517 | 5.90E-07  | 0.97 |
| 30189 | 1619743 | 1620016 | 4.57E-04  | 0.84 |
| 30189 | 1667456 | 1668944 | 1.34E-138 | 0.96 |
| 30189 | 1683757 | 1684177 | 1.74E-46  | 0.98 |
| 30189 | 1764043 | 1764440 | 1.87E-05  | 0.81 |
| 30189 | 1765114 | 1765571 | 1.40E-05  | 0.78 |
| 30190 | 18602   | 19044   | 5.07E-07  | 0.81 |

|       |        |        |           |      |
|-------|--------|--------|-----------|------|
| 30190 | 20230  | 20612  | 3.61E-20  | 0.91 |
| 30190 | 24019  | 24444  | 2.50E-18  | 0.86 |
| 30190 | 53991  | 54683  | 5.34E-20  | 0.68 |
| 30190 | 55163  | 55749  | 7.42E-68  | 0.93 |
| 30190 | 94911  | 95211  | 1.37E-17  | 0.82 |
| 30190 | 103390 | 104072 | 3.20E-61  | 0.83 |
| 30190 | 111121 | 111461 | 1.47E-09  | 0.73 |
| 30190 | 111668 | 112900 | 6.41E-55  | 0.84 |
| 30190 | 114209 | 114793 | 4.55E-60  | 0.94 |
| 30190 | 122149 | 122538 | 2.22E-21  | 0.81 |
| 30190 | 148814 | 149273 | 1.34E-13  | 0.8  |
| 30190 | 151839 | 152226 | 1.86E-57  | 0.86 |
| 30190 | 153552 | 155330 | 5.78E-72  | 0.63 |
| 30190 | 162485 | 162813 | 1.17E-14  | 0.78 |
| 30190 | 203337 | 204632 | 1.91E-108 | 0.9  |
| 30190 | 209151 | 209395 | 9.53E-60  | 0.95 |
| 30190 | 214124 | 214541 | 3.93E-27  | 0.9  |
| 30190 | 225705 | 226305 | 1.11E-96  | 0.9  |
| 30190 | 231389 | 231903 | 1.54E-15  | 0.8  |
| 30190 | 291356 | 293419 | 4.32E-87  | 0.8  |
| 30190 | 307801 | 308145 | 7.66E-15  | 0.82 |
| 30190 | 308570 | 309417 | 1.75E-49  | 0.86 |
| 30190 | 352803 | 353449 | 1.70E-27  | 0.75 |
| 30190 | 406402 | 406903 | 1.40E-28  | 0.85 |
| 30190 | 448744 | 448946 | 2.67E-13  | 0.93 |
| 30190 | 455840 | 456060 | 2.67E-11  | 0.79 |
| 30190 | 462412 | 462656 | 7.95E-30  | 0.92 |
| 30190 | 462903 | 463439 | 1.85E-52  | 0.89 |
| 30190 | 486330 | 486788 | 3.65E-47  | 0.97 |
| 30190 | 504469 | 505245 | 6.77E-47  | 0.76 |
| 30190 | 510788 | 511055 | 9.64E-24  | 0.75 |
| 30190 | 522880 | 523298 | 3.33E-19  | 0.82 |
| 30190 | 523530 | 523754 | 1.35E-20  | 0.93 |
| 30190 | 524024 | 524295 | 8.91E-30  | 0.88 |
| 30190 | 525496 | 526153 | 3.45E-18  | 0.8  |
| 30190 | 534442 | 535420 | 1.92E-27  | 0.69 |
| 30190 | 536865 | 537338 | 3.01E-21  | 0.83 |
| 30190 | 537568 | 537830 | 9.19E-22  | 0.83 |
| 30190 | 686184 | 686595 | 2.21E-25  | 0.97 |
| 30190 | 695090 | 695340 | 1.57E-06  | 0.68 |
| 30190 | 718178 | 719242 | 3.04E-61  | 0.86 |
| 30190 | 780219 | 780776 | 4.53E-19  | 0.79 |
| 30190 | 781923 | 782134 | 7.54E-117 | 0.9  |
| 30190 | 805655 | 806548 | 1.18E-59  | 0.96 |
| 30190 | 807043 | 807513 | 1.08E-43  | 0.9  |
| 30190 | 807726 | 807935 | 1.76E-32  | 0.86 |
| 30190 | 808480 | 809075 | 1.03E-26  | 0.67 |
| 30190 | 838032 | 838274 | 1.80E-09  | 0.76 |
| 30190 | 848188 | 849426 | 1.27E-94  | 0.86 |
| 30190 | 941526 | 942708 | 2.96E-40  | 0.64 |
| 30190 | 956496 | 956915 | 4.01E-17  | 0.91 |
| 30190 | 957714 | 958296 | 2.86E-16  | 0.75 |
| 30190 | 959122 | 959398 | 1.58E-35  | 0.95 |

|       |         |         |           |      |
|-------|---------|---------|-----------|------|
| 30190 | 964757  | 965472  | 2.75E-39  | 0.92 |
| 30190 | 981065  | 981928  | 6.77E-50  | 0.81 |
| 30190 | 985022  | 985487  | 3.91E-13  | 0.73 |
| 30190 | 989223  | 989664  | 3.83E-24  | 0.84 |
| 30190 | 997217  | 998568  | 3.27E-50  | 0.84 |
| 30190 | 1001564 | 1003591 | 1.22E-51  | 0.78 |
| 30190 | 1012015 | 1012298 | 2.00E-15  | 0.83 |
| 30190 | 1016801 | 1017042 | 1.21E-19  | 0.88 |
| 30190 | 1019952 | 1021345 | 3.18E-66  | 0.64 |
| 30190 | 1043858 | 1044131 | 4.18E-14  | 0.82 |
| 30190 | 1051000 | 1051523 | 4.00E-27  | 0.86 |
| 30190 | 1061343 | 1061963 | 5.19E-40  | 0.89 |
| 30190 | 1083505 | 1084275 | 5.24E-41  | 0.87 |
| 30190 | 1085293 | 1085946 | 8.19E-33  | 0.79 |
| 30190 | 1096048 | 1097128 | 8.39E-37  | 0.79 |
| 30190 | 1099101 | 1100129 | 5.33E-43  | 0.87 |
| 30190 | 1135347 | 1136105 | 3.44E-25  | 0.8  |
| 30190 | 1139810 | 1140749 | 3.90E-62  | 0.87 |
| 30190 | 1145013 | 1146884 | 2.37E-120 | 0.94 |
| 30190 | 1164213 | 1165509 | 4.38E-55  | 0.72 |
| 30190 | 1175139 | 1176101 | 7.58E-67  | 0.87 |
| 30190 | 1294967 | 1295180 | 5.77E-18  | 0.75 |
| 30190 | 1295488 | 1295969 | 1.76E-25  | 0.77 |
| 30190 | 1299198 | 1299520 | 1.25E-11  | 0.76 |
| 30190 | 1311642 | 1311869 | 8.24E-51  | 0.89 |
| 30190 | 1313026 | 1314654 | 1.19E-29  | 0.8  |
| 30190 | 1316165 | 1316927 | 1.76E-50  | 0.61 |
| 30190 | 1327520 | 1328795 | 1.55E-52  | 0.77 |
| 30190 | 1340708 | 1341714 | 4.08E-64  | 0.75 |
| 30190 | 1385354 | 1385853 | 1.39E-18  | 0.74 |
| 30190 | 1449646 | 1450586 | 2.33E-99  | 0.81 |
| 30190 | 1455419 | 1455764 | 8.28E-17  | 0.76 |
| 30190 | 1461613 | 1461964 | 1.37E-23  | 0.72 |
| 30190 | 1462168 | 1462492 | 8.46E-24  | 0.81 |
| 30190 | 1491457 | 1492066 | 2.40E-41  | 0.75 |
| 30190 | 1551866 | 1552549 | 1.71E-54  | 0.89 |
| 30190 | 1554985 | 1555197 | 1.21E-27  | 0.93 |
| 30190 | 1581919 | 1582692 | 2.74E-56  | 0.83 |
| 30190 | 1586443 | 1586941 | 8.68E-34  | 0.91 |
| 30190 | 1590316 | 1590927 | 7.52E-18  | 0.9  |
| 30190 | 1601807 | 1602821 | 4.96E-85  | 0.88 |
| 30190 | 1603052 | 1603776 | 5.11E-55  | 0.91 |
| 30190 | 1630977 | 1631184 | 1.43E-07  | 0.84 |
| 30190 | 1641060 | 1641443 | 7.12E-12  | 0.77 |
| 30190 | 1687440 | 1687833 | 5.85E-17  | 0.7  |
| 30190 | 1701560 | 1702343 | 5.58E-53  | 0.85 |
| 30190 | 1748003 | 1748339 | 9.94E-14  | 0.88 |
| 30190 | 1784366 | 1785400 | 2.48E-42  | 0.69 |
| 30190 | 1786443 | 1787007 | 7.56E-29  | 0.79 |
| 30190 | 1873445 | 1873902 | 9.94E-11  | 0.81 |
| 30190 | 1904388 | 1904736 | 1.27E-28  | 0.8  |
| 30190 | 1918248 | 1918882 | 3.24E-27  | 0.91 |
| 30190 | 1922763 | 1923573 | 3.81E-64  | 0.91 |

|       |         |         |           |      |
|-------|---------|---------|-----------|------|
| 30190 | 1925251 | 1926180 | 5.86E-92  | 0.92 |
| 30190 | 1926815 | 1927495 | 5.08E-48  | 0.97 |
| 30190 | 1928239 | 1929908 | 2.36E-157 | 0.91 |
| 30190 | 1930131 | 1931701 | 3.07E-97  | 0.65 |
| 30190 | 1935997 | 1936348 | 8.26E-15  | 0.68 |
| 30190 | 1940448 | 1940818 | 7.80E-31  | 0.8  |
| 30190 | 1943416 | 1943776 | 1.96E-43  | 0.94 |
| 30190 | 1943995 | 1945526 | 6.06E-68  | 0.83 |
| 30190 | 1955330 | 1955709 | 3.71E-09  | 0.74 |
| 30190 | 2012668 | 2012879 | 2.20E-20  | 0.65 |
| 30190 | 2028319 | 2029008 | 7.26E-38  | 0.88 |
| 30190 | 2029218 | 2029573 | 1.89E-35  | 0.8  |
| 30190 | 2037397 | 2037609 | 1.05E-37  | 0.7  |
| 30190 | 2058858 | 2059059 | 4.18E-19  | 0.79 |
| 30190 | 2059305 | 2061314 | 8.92E-131 | 0.87 |
| 30190 | 2064143 | 2064468 | 1.30E-18  | 0.88 |
| 30190 | 2073200 | 2073466 | 3.26E-32  | 0.91 |
| 30190 | 2089786 | 2090132 | 3.85E-16  | 0.78 |
| 30190 | 2100839 | 2101120 | 2.83E-14  | 0.83 |
| 30190 | 2105071 | 2105845 | 6.08E-34  | 0.79 |
| 30190 | 2108037 | 2108456 | 9.31E-19  | 0.9  |
| 30190 | 2125415 | 2125890 | 7.05E-09  | 0.79 |
| 30190 | 2134111 | 2134326 | 4.52E-20  | 0.8  |
| 30190 | 2143638 | 2144407 | 1.40E-53  | 0.88 |
| 30190 | 2144740 | 2145265 | 4.57E-44  | 0.85 |
| 30190 | 2177853 | 2178388 | 1.01E-17  | 0.74 |
| 30190 | 2198749 | 2199506 | 1.08E-50  | 0.61 |
| 30190 | 2224432 | 2225385 | 6.82E-57  | 0.85 |
| 30190 | 2265618 | 2266529 | 3.64E-87  | 0.93 |
| 30190 | 2311504 | 2312429 | 1.57E-53  | 0.81 |
| 30190 | 2313044 | 2313331 | 4.57E-61  | 0.87 |
| 30190 | 2314398 | 2314780 | 2.48E-50  | 0.89 |
| 30190 | 2315021 | 2315226 | 6.59E-30  | 0.86 |
| 30190 | 2315447 | 2316048 | 1.53E-71  | 0.86 |
| 30190 | 2316330 | 2316967 | 1.46E-59  | 0.83 |
| 30190 | 2319642 | 2320596 | 9.34E-39  | 0.91 |
| 30190 | 2320834 | 2321302 | 7.57E-15  | 0.81 |
| 30190 | 2328758 | 2331487 | 0.00E+00  | 0.94 |
| 30190 | 2331798 | 2332166 | 1.19E-86  | 0.95 |
| 30190 | 2332486 | 2333125 | 1.26E-44  | 0.88 |
| 30190 | 2335022 | 2336675 | 1.01E-117 | 0.87 |
| 30190 | 2352235 | 2353498 | 6.60E-60  | 0.77 |
| 30190 | 2362144 | 2362786 | 4.86E-20  | 0.8  |
| 30190 | 2374525 | 2374767 | 6.62E-13  | 0.63 |
| 30190 | 2428473 | 2429949 | 5.99E-46  | 0.72 |
| 30190 | 2435026 | 2436111 | 1.15E-65  | 0.82 |
| 30190 | 2447777 | 2449240 | 7.88E-84  | 0.87 |
| 30190 | 2474644 | 2474995 | 2.46E-16  | 0.74 |
| 30190 | 2488128 | 2488423 | 3.26E-18  | 0.74 |
| 30190 | 2493278 | 2493689 | 2.19E-29  | 0.8  |
| 30190 | 2513070 | 2513441 | 2.52E-42  | 0.95 |
| 30190 | 2546853 | 2547125 | 1.15E-17  | 0.83 |
| 30190 | 2547758 | 2548061 | 2.91E-21  | 0.82 |

|       |         |         |           |      |
|-------|---------|---------|-----------|------|
| 30190 | 2558934 | 2559439 | 3.03E-18  | 0.83 |
| 30190 | 2580074 | 2581119 | 4.60E-48  | 0.86 |
| 30190 | 2582677 | 2583863 | 4.14E-68  | 0.91 |
| 30190 | 2589985 | 2590301 | 1.59E-55  | 0.74 |
| 30190 | 2604315 | 2604739 | 8.00E-85  | 0.91 |
| 30190 | 2639896 | 2640193 | 4.97E-33  | 0.95 |
| 30190 | 2641869 | 2642984 | 1.12E-37  | 0.66 |
| 30190 | 2643253 | 2644557 | 8.31E-79  | 0.85 |
| 30190 | 2666663 | 2666971 | 1.69E-12  | 0.79 |
| 30190 | 2667568 | 2668021 | 3.96E-34  | 0.9  |
| 30190 | 2682327 | 2682610 | 6.43E-14  | 0.82 |
| 30190 | 2684136 | 2684881 | 1.55E-34  | 0.85 |
| 30190 | 2691960 | 2692326 | 1.03E-18  | 0.83 |
| 30190 | 2721250 | 2721531 | 2.68E-13  | 0.69 |
| 30190 | 2730905 | 2731323 | 2.77E-21  | 0.8  |
| 30190 | 2734646 | 2735281 | 2.77E-17  | 0.81 |
| 30190 | 2745296 | 2746936 | 9.40E-48  | 0.79 |
| 30190 | 2747186 | 2748225 | 5.24E-96  | 0.88 |
| 30190 | 2772797 | 2773607 | 1.14E-29  | 0.74 |
| 30190 | 2773908 | 2774231 | 2.20E-26  | 0.8  |
| 30190 | 2776026 | 2777769 | 1.42E-120 | 0.64 |
| 30190 | 2792253 | 2792474 | 2.42E-11  | 0.84 |
| 30190 | 2799434 | 2799909 | 3.71E-16  | 0.82 |
| 30190 | 2846113 | 2846529 | 1.13E-58  | 0.91 |
| 30190 | 2871917 | 2872824 | 3.88E-55  | 0.69 |
| 30190 | 2909210 | 2909710 | 1.88E-13  | 0.79 |
| 30190 | 2909936 | 2910773 | 8.65E-40  | 0.81 |
| 30190 | 2919347 | 2919860 | 1.38E-21  | 0.78 |
| 30190 | 2947511 | 2947843 | 7.47E-19  | 0.87 |
| 30190 | 2975517 | 2975995 | 5.21E-12  | 0.81 |
| 30190 | 2992448 | 2992740 | 1.81E-16  | 0.94 |
| 30190 | 2999714 | 3000100 | 2.76E-16  | 0.92 |
| 30190 | 3005759 | 3007597 | 4.97E-103 | 0.92 |
| 30190 | 3029721 | 3030991 | 9.01E-79  | 0.88 |
| 30190 | 3032500 | 3033031 | 3.00E-36  | 0.83 |
| 30190 | 3033313 | 3033887 | 2.70E-29  | 0.93 |
| 30190 | 3034210 | 3034479 | 1.25E-29  | 0.91 |
| 30190 | 3042212 | 3042735 | 1.41E-14  | 0.77 |
| 30190 | 3052778 | 3053303 | 1.04E-22  | 0.79 |
| 30190 | 3053504 | 3053761 | 2.93E-29  | 0.91 |
| 30190 | 3062556 | 3063321 | 7.05E-58  | 0.77 |
| 30190 | 3063552 | 3064438 | 1.12E-127 | 0.84 |
| 30190 | 3065360 | 3065906 | 3.15E-58  | 0.78 |
| 30190 | 3072162 | 3072714 | 8.64E-70  | 0.87 |
| 30190 | 3170777 | 3172076 | 1.72E-44  | 0.65 |
| 30190 | 3173456 | 3175506 | 9.88E-79  | 0.72 |
| 30190 | 3176286 | 3176595 | 2.42E-15  | 0.81 |
| 30190 | 3178287 | 3178958 | 3.24E-56  | 0.72 |
| 30190 | 3199995 | 3200612 | 9.76E-25  | 0.79 |
| 30190 | 3203047 | 3204217 | 3.46E-51  | 0.83 |
| 30190 | 3213490 | 3214540 | 6.30E-38  | 0.8  |
| 30190 | 3235905 | 3236679 | 1.04E-47  | 0.84 |
| 30190 | 3236758 | 3237845 | 7.08E-38  | 0.8  |

|       |         |         |           |      |
|-------|---------|---------|-----------|------|
| 30190 | 3238087 | 3238736 | 1.37E-29  | 0.84 |
| 30190 | 3256460 | 3256815 | 4.63E-10  | 0.78 |
| 30190 | 3335913 | 3337510 | 3.87E-78  | 0.81 |
| 30190 | 3355632 | 3356018 | 3.27E-21  | 0.84 |
| 30190 | 3396537 | 3397329 | 7.69E-22  | 0.61 |
| 30190 | 3414652 | 3415305 | 7.26E-40  | 0.65 |
| 30190 | 3415770 | 3416051 | 7.38E-23  | 0.85 |
| 30190 | 3416282 | 3417342 | 1.57E-75  | 0.92 |
| 30190 | 3418121 | 3418741 | 2.79E-30  | 0.86 |
| 30190 | 3419099 | 3421181 | 8.73E-94  | 0.79 |
| 30190 | 3516226 | 3516583 | 1.95E-16  | 0.94 |
| 30190 | 3618180 | 3618509 | 7.81E-41  | 0.77 |
| 30190 | 3624689 | 3625326 | 5.16E-32  | 0.79 |
| 30190 | 3653246 | 3654045 | 6.83E-35  | 0.89 |
| 30190 | 3672748 | 3673136 | 5.81E-24  | 0.78 |
| 30190 | 3673347 | 3673643 | 5.07E-10  | 0.71 |
| 30190 | 3685864 | 3688269 | 8.75E-128 | 0.86 |
| 30190 | 3697630 | 3697975 | 2.54E-15  | 0.78 |
| 30190 | 3699097 | 3699435 | 2.11E-18  | 0.81 |
| 30190 | 3730847 | 3731408 | 8.11E-19  | 0.84 |
| 30190 | 3745431 | 3745735 | 1.06E-23  | 0.83 |
| 30190 | 3781371 | 3781785 | 5.61E-17  | 0.9  |
| 30190 | 3783635 | 3783931 | 4.14E-13  | 0.83 |
| 30190 | 3791902 | 3792338 | 6.38E-05  | 0.77 |
| 30191 | 31727   | 32058   | 1.12E-02  | 0.74 |
| 30191 | 52099   | 52394   | 1.09E-26  | 0.97 |
| 30191 | 106947  | 107704  | 3.24E-27  | 0.98 |
| 30191 | 132705  | 133143  | 4.10E-05  | 0.85 |
| 30191 | 205649  | 206050  | 6.66E-06  | 1    |
| 30192 | 78638   | 78896   | 4.60E-10  | 0.92 |
| 30192 | 119458  | 119806  | 6.40E-05  | 0.9  |
| 30192 | 165453  | 165897  | 7.10E-21  | 0.96 |
| 30192 | 179460  | 179861  | 1.10E-61  | 0.94 |
| 30192 | 259409  | 259993  | 4.97E-60  | 0.88 |
| 30192 | 326554  | 327272  | 2.07E-30  | 0.82 |
| 30192 | 353430  | 354130  | 9.13E-61  | 0.93 |
| 30192 | 392972  | 393535  | 3.86E-20  | 0.92 |
| 30192 | 420307  | 421738  | 2.05E-57  | 0.64 |
| 30192 | 480309  | 480866  | 3.18E-04  | 0.92 |
| 30192 | 498544  | 498876  | 9.23E-05  | 0.91 |
| 30192 | 529427  | 530004  | 1.84E-68  | 0.89 |
| 30192 | 537500  | 537757  | 5.49E-09  | 0.98 |
| 30192 | 538389  | 538592  | 1.81E-03  | 0.93 |
| 30192 | 548975  | 549207  | 6.85E-31  | 0.9  |
| 30192 | 572738  | 573049  | 5.67E-03  | 0.82 |
| 30192 | 573815  | 574023  | 1.71E-05  | 0.83 |
| 30192 | 752403  | 752821  | 6.36E-14  | 0.66 |
| 30192 | 758372  | 759202  | 6.86E-08  | 0.6  |
| 30192 | 763108  | 763546  | 2.16E-10  | 0.75 |
| 30192 | 764147  | 764472  | 1.57E-08  | 0.89 |
| 30192 | 765410  | 765619  | 3.10E-07  | 0.93 |
| 30192 | 768382  | 768983  | 2.08E-05  | 0.97 |
| 30192 | 770838  | 771186  | 3.12E-04  | 0.83 |

|       |        |        |           |      |
|-------|--------|--------|-----------|------|
| 30192 | 803676 | 803967 | 8.63E-04  | 0.91 |
| 30192 | 805494 | 806008 | 1.07E-05  | 0.88 |
| 30192 | 818414 | 818618 | 3.09E-06  | 0.96 |
| 30192 | 864465 | 864917 | 9.53E-14  | 0.93 |
| 30192 | 903307 | 903875 | 7.05E-10  | 0.96 |
| 30192 | 906103 | 906303 | 1.60E-04  | 0.78 |
| 30192 | 915146 | 915935 | 6.34E-10  | 0.9  |
| 30192 | 935399 | 935741 | 1.25E-08  | 0.78 |
| 30192 | 960895 | 961136 | 1.51E-09  | 0.89 |
| 30192 | 964898 | 965136 | 1.09E-20  | 0.8  |
| 30193 | 7043   | 9942   | 1.75E-209 | 0.91 |
| 30193 | 18513  | 19639  | 4.76E-73  | 0.95 |
| 30193 | 21250  | 22835  | 1.05E-147 | 0.96 |
| 30193 | 23103  | 23423  | 1.03E-19  | 0.82 |
| 30193 | 34874  | 35113  | 4.03E-40  | 0.97 |
| 30193 | 50438  | 50721  | 8.37E-12  | 0.87 |
| 30193 | 111373 | 111722 | 1.61E-07  | 0.75 |
| 30193 | 117707 | 117971 | 8.43E-13  | 0.82 |
| 30193 | 197830 | 198426 | 5.72E-29  | 0.91 |
| 30193 | 202268 | 202783 | 4.65E-13  | 0.82 |
| 30193 | 220747 | 221717 | 1.01E-77  | 0.74 |
| 30193 | 222187 | 222690 | 1.17E-49  | 0.9  |
| 30193 | 223344 | 223808 | 4.31E-24  | 0.83 |
| 30193 | 314154 | 314377 | 5.04E-06  | 0.93 |
| 30193 | 329942 | 330227 | 2.68E-12  | 0.8  |
| 30193 | 360411 | 361036 | 2.56E-41  | 0.94 |
| 30193 | 373229 | 373455 | 1.40E-20  | 0.83 |
| 30193 | 374047 | 374623 | 1.92E-39  | 0.94 |
| 30193 | 433437 | 433989 | 4.20E-39  | 0.97 |
| 30193 | 472606 | 473616 | 1.01E-101 | 0.84 |
| 30193 | 478175 | 479150 | 9.22E-44  | 0.81 |
| 30193 | 480092 | 480837 | 2.94E-52  | 0.91 |
| 30193 | 481130 | 481662 | 1.23E-44  | 0.94 |
| 30193 | 490991 | 492344 | 8.30E-118 | 0.94 |
| 30193 | 493538 | 494128 | 1.92E-14  | 0.81 |
| 30193 | 508388 | 508610 | 9.23E-23  | 0.96 |
| 30193 | 522312 | 523481 | 3.80E-38  | 0.9  |
| 30193 | 534330 | 535030 | 2.84E-41  | 0.92 |
| 30193 | 583240 | 584091 | 2.97E-43  | 0.93 |
| 30193 | 587018 | 587647 | 9.37E-24  | 0.84 |
| 30193 | 595315 | 596398 | 1.41E-86  | 0.95 |
| 30194 | 126538 | 126891 | 8.92E-04  | 0.73 |
| 30195 | 19601  | 19909  | 6.32E-13  | 0.81 |
| 30195 | 23029  | 23476  | 1.69E-07  | 0.85 |
| 30195 | 25651  | 25913  | 4.36E-31  | 0.89 |
| 30195 | 26515  | 27268  | 1.24E-47  | 0.87 |
| 30195 | 28657  | 29011  | 7.36E-24  | 0.87 |
| 30195 | 139580 | 139929 | 4.41E-12  | 0.84 |
| 30195 | 143390 | 143590 | 4.94E-06  | 1    |
| 30195 | 166589 | 167509 | 1.40E-19  | 0.81 |
| 30195 | 192049 | 192501 | 4.60E-09  | 0.81 |
| 30195 | 192108 | 192581 | 4.91E-11  | 0.88 |
| 30195 | 274595 | 275099 | 8.12E-10  | 0.86 |

|       |        |        |          |      |
|-------|--------|--------|----------|------|
| 30195 | 274718 | 275196 | 3.82E-11 | 0.85 |
| 30195 | 291049 | 291698 | 6.07E-29 | 0.87 |
| 30195 | 294092 | 294878 | 3.30E-36 | 0.85 |
| 30195 | 295243 | 295751 | 6.37E-34 | 0.86 |
| 30195 | 298797 | 299695 | 3.89E-27 | 0.83 |
| 30195 | 311235 | 312677 | 1.54E-58 | 0.8  |
| 30195 | 314118 | 314460 | 1.65E-28 | 0.89 |
| 30195 | 350525 | 350809 | 5.41E-05 | 0.84 |
| 30195 | 387607 | 389198 | 8.53E-94 | 0.75 |
| 30195 | 408233 | 408477 | 7.22E-17 | 0.97 |
| 30195 | 429141 | 429636 | 2.17E-12 | 0.77 |
| 30195 | 442342 | 442717 | 2.37E-10 | 1    |
| 30196 | 2442   | 2757   | 1.38E-05 | 1    |
| 30196 | 4836   | 5182   | 1.17E-06 | 1    |
| 30196 | 101973 | 102246 | 3.78E-25 | 0.9  |
| 30196 | 102452 | 103067 | 2.35E-35 | 0.86 |
| 30196 | 106166 | 106643 | 4.91E-18 | 0.91 |
| 30196 | 138953 | 139629 | 2.20E-07 | 1    |
| 30197 | 14607  | 15158  | 1.89E-08 | 0.93 |
| 30197 | 40096  | 40614  | 8.92E-13 | 0.98 |
| 30197 | 65263  | 65648  | 2.67E-22 | 0.82 |
| 30197 | 65915  | 66701  | 3.98E-13 | 0.79 |
| 30197 | 73718  | 74177  | 6.59E-26 | 0.9  |
| 30197 | 74747  | 75647  | 6.53E-60 | 0.9  |
| 30197 | 76287  | 76629  | 1.47E-37 | 0.91 |
| 30197 | 91864  | 92687  | 3.99E-48 | 0.95 |
| 30197 | 261931 | 262189 | 1.41E-07 | 0.82 |
| 30198 | 74296  | 74686  | 6.37E-22 | 0.88 |
| 30198 | 76007  | 76681  | 7.71E-52 | 0.89 |
| 30198 | 77656  | 77995  | 2.85E-20 | 0.85 |
| 30198 | 114151 | 114373 | 1.55E-17 | 0.87 |
| 30198 | 115136 | 115840 | 4.42E-31 | 0.77 |
| 30198 | 167654 | 168682 | 1.31E-33 | 0.75 |
| 30198 | 181585 | 182341 | 3.02E-75 | 0.94 |
| 30198 | 183162 | 183434 | 2.43E-36 | 0.92 |
| 30198 | 227143 | 227739 | 8.15E-24 | 0.88 |
| 30198 | 234304 | 234527 | 3.91E-07 | 0.92 |
| 30198 | 236389 | 236648 | 4.73E-21 | 0.97 |
| 30198 | 266657 | 267132 | 6.74E-60 | 0.96 |
| 30198 | 281305 | 281746 | 3.25E-23 | 0.92 |
| 30198 | 332643 | 333068 | 5.71E-27 | 0.95 |
| 30198 | 334963 | 335587 | 2.76E-70 | 0.97 |
| 30198 | 336608 | 337118 | 1.12E-24 | 0.89 |
| 30198 | 337912 | 338159 | 1.82E-56 | 0.94 |
| 30198 | 338888 | 339224 | 5.38E-25 | 0.78 |
| 30198 | 379597 | 379963 | 6.42E-23 | 0.96 |
| 30198 | 390330 | 390697 | 1.35E-26 | 0.86 |
| 30198 | 390995 | 391328 | 6.34E-13 | 0.97 |
| 30198 | 422665 | 422944 | 3.73E-21 | 0.86 |
| 30198 | 424114 | 424883 | 1.15E-50 | 0.9  |
| 30198 | 426668 | 426872 | 2.38E-21 | 0.92 |
| 30198 | 427080 | 427444 | 3.35E-19 | 0.9  |
| 30198 | 429533 | 430036 | 1.07E-41 | 0.92 |



|       |         |         |          |      |
|-------|---------|---------|----------|------|
| 30198 | 443420  | 443782  | 2.43E-16 | 0.8  |
| 30198 | 455194  | 455601  | 1.41E-33 | 0.95 |
| 30198 | 459919  | 460474  | 4.27E-46 | 0.93 |
| 30198 | 473122  | 473362  | 2.57E-05 | 1    |
| 30198 | 490227  | 490515  | 2.33E-14 | 0.9  |
| 30198 | 492794  | 494337  | 1.16E-69 | 0.91 |
| 30198 | 496566  | 497013  | 9.25E-13 | 0.73 |
| 30198 | 529827  | 530329  | 1.70E-58 | 0.86 |
| 30198 | 541275  | 541709  | 1.95E-17 | 0.88 |
| 30198 | 542641  | 542927  | 6.19E-18 | 0.85 |
| 30198 | 572715  | 573275  | 5.05E-38 | 0.88 |
| 30198 | 610595  | 611370  | 4.24E-70 | 0.94 |
| 30198 | 696400  | 696901  | 1.58E-40 | 0.9  |
| 30198 | 697838  | 698403  | 2.39E-24 | 0.79 |
| 30198 | 698912  | 699401  | 5.01E-43 | 0.81 |
| 30198 | 702311  | 703760  | 2.92E-48 | 0.78 |
| 30198 | 734163  | 734723  | 5.50E-07 | 0.89 |
| 30198 | 737503  | 738069  | 6.33E-05 | 0.81 |
| 30198 | 739058  | 739408  | 1.38E-08 | 0.97 |
| 30198 | 746900  | 747147  | 1.41E-06 | 0.96 |
| 30198 | 756983  | 757443  | 7.61E-11 | 0.85 |
| 30198 | 796966  | 797258  | 3.61E-48 | 0.98 |
| 30198 | 886731  | 887231  | 8.74E-21 | 0.81 |
| 30198 | 901563  | 901936  | 2.88E-11 | 0.68 |
| 30198 | 925064  | 925409  | 6.05E-20 | 0.81 |
| 30198 | 926011  | 926650  | 2.87E-48 | 0.91 |
| 30198 | 956445  | 957580  | 3.09E-32 | 0.83 |
| 30198 | 1051439 | 1051748 | 1.86E-11 | 0.9  |
| 30198 | 1075912 | 1076291 | 2.36E-41 | 0.97 |
| 30198 | 1076833 | 1077067 | 7.68E-13 | 0.82 |
| 30198 | 1109111 | 1110194 | 6.46E-48 | 0.65 |
| 30199 | 48585   | 49047   | 3.30E-06 | 0.77 |
| 30199 | 55283   | 55739   | 2.20E-16 | 0.91 |
| 30199 | 69192   | 69902   | 2.56E-34 | 0.75 |
| 30199 | 165893  | 166166  | 1.09E-44 | 0.95 |
| 30199 | 167112  | 167376  | 3.13E-19 | 0.89 |
| 30199 | 226371  | 227122  | 5.55E-47 | 0.96 |
| 30199 | 227333  | 227816  | 1.52E-70 | 0.94 |
| 30199 | 228221  | 228462  | 1.00E-49 | 0.96 |
| 30199 | 256478  | 256867  | 2.18E-03 | 0.9  |
| 30199 | 355744  | 356584  | 1.14E-10 | 0.72 |
| 30199 | 450235  | 450565  | 6.10E-07 | 1    |
| 30199 | 522882  | 523088  | 7.19E-11 | 0.89 |
| 30199 | 662566  | 662901  | 2.23E-18 | 0.68 |
| 30199 | 680683  | 680932  | 3.77E-35 | 0.86 |
| 30199 | 681295  | 681844  | 2.92E-22 | 0.95 |
| 30199 | 687190  | 688104  | 9.40E-43 | 0.93 |
| 30199 | 701075  | 701339  | 1.62E-11 | 0.81 |
| 30199 | 729361  | 729807  | 1.62E-19 | 0.81 |
| 30199 | 755598  | 756014  | 3.43E-63 | 0.92 |
| 30199 | 778135  | 779129  | 4.46E-70 | 0.95 |
| 30200 | 29319   | 29865   | 2.29E-08 | 0.7  |
| 30200 | 72616   | 73262   | 1.38E-81 | 0.95 |

|       |        |        |           |      |
|-------|--------|--------|-----------|------|
| 30200 | 73481  | 73778  | 6.05E-20  | 0.95 |
| 30200 | 114797 | 115141 | 7.47E-21  | 0.94 |
| 30200 | 116512 | 116887 | 3.91E-22  | 0.95 |
| 30200 | 144782 | 145011 | 2.72E-13  | 0.79 |
| 30200 | 160484 | 160970 | 4.99E-38  | 0.92 |
| 30200 | 161173 | 162206 | 3.20E-195 | 0.95 |
| 30200 | 226883 | 227289 | 5.35E-04  | 0.95 |
| 30200 | 255165 | 256008 | 3.09E-20  | 0.74 |
| 30200 | 259736 | 260121 | 2.57E-10  | 0.79 |
| 30200 | 268543 | 269692 | 6.68E-40  | 0.86 |
| 30200 | 321949 | 322260 | 1.70E-22  | 0.84 |
| 30200 | 325228 | 325618 | 9.47E-41  | 0.95 |
| 30200 | 327991 | 328372 | 3.65E-35  | 0.7  |
| 30200 | 343286 | 343897 | 4.75E-49  | 0.96 |
| 30200 | 344799 | 345052 | 8.55E-36  | 0.95 |
| 30200 | 351269 | 352244 | 6.43E-43  | 0.97 |
| 30200 | 359611 | 359871 | 1.30E-14  | 0.78 |
| 30200 | 378984 | 379504 | 1.37E-14  | 0.71 |
| 30200 | 379753 | 380217 | 1.71E-34  | 0.93 |
| 30200 | 467364 | 467680 | 1.50E-13  | 0.97 |
| 30201 | 38103  | 38427  | 1.30E-21  | 0.93 |
| 30201 | 45663  | 45986  | 3.30E-09  | 0.85 |
| 30201 | 46127  | 46357  | 9.01E-06  | 0.95 |
| 30201 | 48921  | 49216  | 1.44E-08  | 0.97 |
| 30201 | 62125  | 62358  | 4.95E-07  | 0.84 |
| 30201 | 66659  | 67110  | 1.91E-09  | 0.92 |
| 30201 | 106136 | 106488 | 8.85E-07  | 0.9  |
| 30201 | 108684 | 109368 | 1.33E-20  | 0.78 |
| 30201 | 232806 | 233021 | 3.36E-21  | 0.98 |
| 30201 | 234427 | 235124 | 2.36E-43  | 0.88 |
| 30201 | 236142 | 236505 | 1.28E-38  | 0.98 |
| 30201 | 236778 | 237086 | 2.50E-28  | 0.97 |
| 30201 | 239169 | 239468 | 1.44E-35  | 0.96 |
| 30201 | 239674 | 240276 | 4.92E-30  | 0.9  |
| 30201 | 344653 | 345088 | 6.47E-10  | 0.86 |
| 30202 | 6972   | 7323   | 3.48E-15  | 0.86 |
| 30202 | 54450  | 54931  | 1.36E-37  | 0.81 |
| 30202 | 55153  | 55657  | 6.42E-26  | 0.86 |
| 30202 | 59580  | 60553  | 3.92E-27  | 0.89 |
| 30202 | 64691  | 65009  | 2.49E-34  | 0.92 |
| 30202 | 80240  | 80540  | 2.68E-06  | 0.81 |
| 30202 | 92398  | 92723  | 2.58E-22  | 0.89 |
| 30202 | 92943  | 93697  | 6.10E-28  | 0.63 |
| 30202 | 102554 | 103374 | 6.19E-31  | 0.82 |
| 30202 | 120234 | 120896 | 3.46E-28  | 0.9  |
| 30202 | 138823 | 139809 | 1.97E-70  | 0.91 |
| 30202 | 144664 | 144866 | 5.31E-11  | 0.96 |
| 30202 | 146864 | 147225 | 9.31E-28  | 0.85 |
| 30202 | 148505 | 148721 | 2.21E-29  | 0.87 |
| 30202 | 150664 | 151116 | 4.65E-36  | 0.93 |
| 30202 | 158001 | 158266 | 5.33E-30  | 0.93 |
| 30202 | 178943 | 179195 | 3.02E-31  | 0.9  |
| 30202 | 180925 | 181261 | 1.43E-54  | 0.93 |

|       |        |        |           |      |
|-------|--------|--------|-----------|------|
| 30202 | 189622 | 190017 | 3.07E-19  | 0.9  |
| 30202 | 213101 | 213440 | 4.02E-49  | 0.93 |
| 30203 | 674    | 1013   | 2.68E-10  | 0.92 |
| 30203 | 51295  | 52014  | 3.18E-12  | 0.95 |
| 30203 | 52045  | 52284  | 2.81E-04  | 0.8  |
| 30203 | 88689  | 88965  | 6.38E-14  | 0.93 |
| 30203 | 122116 | 122498 | 3.05E-15  | 0.83 |
| 30203 | 135089 | 135300 | 4.15E-16  | 0.93 |
| 30203 | 137760 | 138155 | 4.47E-08  | 0.78 |
| 30203 | 171707 | 171956 | 2.66E-33  | 0.98 |
| 30203 | 195537 | 195916 | 2.30E-04  | 0.84 |
| 30203 | 298043 | 298333 | 6.97E-17  | 0.72 |
| 30203 | 300411 | 301004 | 1.17E-20  | 0.89 |
| 30203 | 331977 | 332454 | 1.46E-11  | 0.93 |
| 30203 | 333315 | 333886 | 8.30E-11  | 0.95 |
| 30203 | 333909 | 334152 | 5.05E-05  | 0.93 |
| 30203 | 337214 | 337780 | 8.98E-23  | 0.89 |
| 30203 | 380960 | 381620 | 2.60E-27  | 0.82 |
| 30203 | 392306 | 392593 | 1.24E-12  | 0.85 |
| 30203 | 412319 | 412998 | 3.05E-05  | 0.76 |
| 30203 | 443286 | 443560 | 1.37E-03  | 0.94 |
| 30203 | 450304 | 450587 | 3.34E-11  | 0.85 |
| 30203 | 497654 | 498093 | 2.74E-15  | 0.86 |
| 30203 | 498299 | 498603 | 4.11E-04  | 1    |
| 30203 | 509521 | 509792 | 2.29E-05  | 0.83 |
| 30204 | 21170  | 21786  | 1.02E-50  | 0.91 |
| 30204 | 23189  | 24063  | 1.84E-12  | 0.73 |
| 30204 | 25326  | 26925  | 2.41E-51  | 0.8  |
| 30204 | 37556  | 38086  | 1.43E-52  | 0.76 |
| 30204 | 49471  | 50451  | 1.04E-27  | 0.69 |
| 30204 | 56411  | 56662  | 1.53E-40  | 0.9  |
| 30204 | 59594  | 60233  | 6.21E-29  | 0.8  |
| 30204 | 74298  | 74830  | 3.82E-58  | 0.94 |
| 30204 | 76910  | 77521  | 1.61E-27  | 0.81 |
| 30204 | 109653 | 110101 | 1.38E-25  | 0.84 |
| 30204 | 116115 | 116866 | 3.84E-42  | 0.85 |
| 30204 | 117073 | 118777 | 3.11E-92  | 0.85 |
| 30204 | 122813 | 123406 | 1.42E-16  | 0.61 |
| 30204 | 130909 | 131703 | 1.32E-31  | 0.78 |
| 30204 | 131993 | 132482 | 2.83E-45  | 0.82 |
| 30204 | 134238 | 135155 | 4.47E-68  | 0.63 |
| 30204 | 139609 | 140328 | 5.02E-40  | 0.84 |
| 30204 | 229767 | 230307 | 5.42E-55  | 0.78 |
| 30204 | 267467 | 267976 | 2.84E-33  | 0.78 |
| 30204 | 269511 | 270254 | 3.17E-79  | 0.93 |
| 30204 | 270459 | 271148 | 2.35E-20  | 0.94 |
| 30204 | 271368 | 272562 | 1.06E-33  | 0.8  |
| 30204 | 292963 | 293836 | 2.79E-39  | 0.84 |
| 30204 | 295650 | 297652 | 2.03E-140 | 0.87 |
| 30204 | 303167 | 303448 | 6.51E-13  | 0.86 |
| 30204 | 339147 | 340152 | 1.74E-44  | 0.79 |
| 30204 | 340407 | 341112 | 2.60E-42  | 0.71 |
| 30204 | 358761 | 360511 | 6.33E-87  | 0.75 |

|       |        |        |           |      |
|-------|--------|--------|-----------|------|
| 30204 | 364034 | 364262 | 2.45E-16  | 0.79 |
| 30204 | 373895 | 374334 | 5.40E-11  | 0.66 |
| 30204 | 374582 | 374907 | 1.92E-26  | 0.76 |
| 30204 | 375145 | 375595 | 6.40E-23  | 0.86 |
| 30204 | 375853 | 376092 | 9.38E-15  | 0.64 |
| 30204 | 382179 | 383047 | 5.13E-37  | 0.75 |
| 30204 | 384429 | 384948 | 1.06E-32  | 0.88 |
| 30204 | 390010 | 390427 | 6.00E-56  | 0.91 |
| 30204 | 412772 | 413551 | 7.18E-29  | 0.67 |
| 30204 | 417140 | 418476 | 1.65E-56  | 0.67 |
| 30204 | 423238 | 423476 | 3.18E-18  | 0.94 |
| 30204 | 427924 | 428582 | 2.91E-23  | 0.62 |
| 30204 | 523934 | 524140 | 1.00E-15  | 0.8  |
| 30204 | 544075 | 545788 | 2.83E-73  | 0.8  |
| 30204 | 571880 | 572483 | 1.52E-32  | 0.92 |
| 30204 | 573099 | 574015 | 1.31E-29  | 0.68 |
| 30204 | 605830 | 606257 | 7.30E-52  | 0.79 |
| 30204 | 608919 | 609534 | 1.08E-35  | 0.82 |
| 30204 | 609867 | 610345 | 1.57E-30  | 0.74 |
| 30204 | 610601 | 612531 | 1.32E-150 | 0.88 |
| 30204 | 617421 | 617823 | 1.68E-14  | 0.8  |
| 30204 | 628006 | 628450 | 4.88E-21  | 0.9  |
| 30204 | 641259 | 642064 | 6.54E-63  | 0.93 |
| 30204 | 642976 | 643251 | 5.04E-36  | 0.81 |
| 30204 | 651292 | 653210 | 6.62E-123 | 0.83 |
| 30204 | 667216 | 667832 | 4.07E-25  | 0.81 |
| 30204 | 721813 | 722736 | 2.98E-48  | 0.82 |
| 30204 | 726768 | 727222 | 1.86E-34  | 0.9  |
| 30204 | 732439 | 733130 | 5.67E-30  | 0.86 |
| 30205 | 6747   | 7680   | 7.14E-54  | 0.86 |
| 30205 | 30732  | 31732  | 3.27E-38  | 0.87 |
| 30205 | 32680  | 32988  | 9.61E-15  | 0.78 |
| 30205 | 52076  | 52800  | 2.14E-24  | 0.83 |
| 30205 | 53143  | 53546  | 3.67E-26  | 0.92 |
| 30205 | 55628  | 56011  | 3.77E-16  | 0.75 |
| 30205 | 58857  | 59173  | 1.33E-11  | 0.72 |
| 30205 | 62537  | 63871  | 6.46E-114 | 0.91 |
| 30205 | 66673  | 67095  | 2.43E-26  | 0.94 |
| 30205 | 75771  | 75993  | 9.75E-25  | 0.91 |
| 30205 | 118483 | 119393 | 1.10E-163 | 0.95 |
| 30205 | 122171 | 123064 | 1.65E-91  | 0.98 |
| 30205 | 136179 | 136391 | 1.52E-60  | 0.95 |
| 30205 | 138014 | 138362 | 1.00E-64  | 0.95 |
| 30205 | 139158 | 140352 | 5.25E-56  | 0.83 |
| 30205 | 142848 | 143259 | 6.97E-66  | 0.91 |
| 30205 | 188655 | 189218 | 1.63E-24  | 0.93 |
| 30205 | 190964 | 191438 | 9.29E-32  | 0.98 |
| 30205 | 193377 | 193987 | 9.37E-63  | 0.96 |
| 30205 | 194301 | 194797 | 1.12E-25  | 0.91 |
| 30205 | 202222 | 202737 | 1.40E-07  | 0.8  |
| 30205 | 207139 | 207908 | 5.26E-80  | 0.95 |
| 30205 | 223331 | 224045 | 9.10E-27  | 0.62 |
| 30205 | 226310 | 226947 | 2.07E-45  | 0.81 |

|       |        |        |           |      |
|-------|--------|--------|-----------|------|
| 30205 | 228027 | 228786 | 1.76E-43  | 0.92 |
| 30205 | 229485 | 229955 | 1.36E-18  | 0.96 |
| 30205 | 256400 | 256904 | 4.69E-26  | 0.92 |
| 30205 | 257280 | 259141 | 7.10E-63  | 0.74 |
| 30205 | 289476 | 289844 | 6.60E-114 | 0.98 |
| 30205 | 317509 | 317823 | 4.34E-04  | 0.94 |
| 30205 | 362655 | 362899 | 1.53E-25  | 0.97 |
| 30205 | 378946 | 379169 | 1.93E-22  | 0.86 |
| 30205 | 380851 | 381723 | 4.18E-32  | 0.79 |
| 30205 | 404920 | 405584 | 5.08E-35  | 0.85 |
| 30205 | 409550 | 409862 | 3.93E-20  | 0.91 |
| 30205 | 412095 | 412525 | 4.31E-28  | 0.94 |
| 30205 | 419044 | 419491 | 2.77E-27  | 0.86 |
| 30205 | 442019 | 442434 | 4.46E-12  | 0.63 |
| 30205 | 463821 | 464600 | 4.05E-28  | 0.87 |
| 30205 | 473947 | 474486 | 9.48E-09  | 0.92 |
| 30205 | 479390 | 479641 | 1.17E-10  | 0.82 |
| 30205 | 481466 | 482133 | 2.21E-11  | 0.77 |
| 30205 | 482415 | 482992 | 1.45E-64  | 0.95 |
| 30205 | 506774 | 507394 | 5.95E-47  | 0.93 |
| 30205 | 510989 | 511835 | 4.01E-27  | 0.65 |
| 30205 | 512263 | 512805 | 5.04E-32  | 0.95 |
| 30205 | 513013 | 513755 | 1.03E-39  | 0.95 |
| 30205 | 542641 | 543117 | 1.43E-13  | 0.6  |
| 30205 | 553289 | 554176 | 3.48E-46  | 0.8  |
| 30205 | 562863 | 563313 | 8.51E-31  | 0.77 |
| 30205 | 584308 | 584605 | 8.16E-26  | 0.87 |
| 30205 | 593830 | 594530 | 1.54E-58  | 0.89 |
| 30205 | 612481 | 613183 | 2.39E-60  | 0.62 |
| 30205 | 613461 | 613759 | 2.95E-14  | 0.76 |
| 30205 | 614172 | 614901 | 1.28E-35  | 0.92 |
| 30205 | 615227 | 615671 | 9.54E-23  | 0.69 |
| 30205 | 615983 | 616656 | 1.85E-29  | 0.63 |
| 30205 | 628821 | 629640 | 3.01E-41  | 0.92 |
| 30205 | 636773 | 637497 | 2.17E-27  | 0.86 |
| 30205 | 640644 | 641060 | 1.19E-21  | 0.81 |
| 30205 | 653726 | 654289 | 7.24E-10  | 0.78 |
| 30205 | 674842 | 675096 | 7.88E-07  | 0.86 |
| 30205 | 698200 | 698654 | 3.68E-09  | 0.89 |
| 30205 | 700450 | 700774 | 1.38E-03  | 1    |
| 30205 | 719828 | 720106 | 3.78E-10  | 0.85 |
| 30205 | 737120 | 737343 | 6.24E-04  | 1    |
| 30205 | 752762 | 753172 | 3.90E-12  | 0.81 |
| 30205 | 756569 | 757090 | 8.32E-39  | 0.89 |
| 30205 | 791296 | 792243 | 6.13E-46  | 0.86 |
| 30205 | 821366 | 821618 | 4.76E-10  | 0.86 |
| 30205 | 835583 | 835832 | 1.35E-04  | 1    |
| 30205 | 878349 | 878848 | 2.02E-25  | 0.95 |
| 30205 | 879091 | 879708 | 3.78E-41  | 0.87 |
| 30205 | 881450 | 882213 | 1.88E-46  | 0.86 |
| 30205 | 883063 | 883474 | 2.51E-51  | 0.8  |
| 30205 | 951799 | 952367 | 2.69E-20  | 0.2  |
| 30205 | 962270 | 962673 | 6.35E-04  | 0.94 |

|       |         |         |           |      |
|-------|---------|---------|-----------|------|
| 30205 | 988810  | 989613  | 1.26E-30  | 0.94 |
| 30205 | 1066364 | 1066596 | 2.07E-08  | 0.68 |
| 30205 | 1105824 | 1106176 | 9.29E-08  | 0.81 |
| 30205 | 1105953 | 1106243 | 1.52E-07  | 0.79 |
| 30205 | 1118880 | 1119102 | 7.81E-06  | 0.97 |
| 30205 | 1128839 | 1129709 | 6.26E-21  | 0.86 |
| 30205 | 1195715 | 1196373 | 4.04E-12  | 0.69 |
| 30205 | 1200428 | 1200863 | 6.63E-35  | 0.9  |
| 30205 | 1229189 | 1229484 | 9.13E-07  | 0.8  |
| 30205 | 1257526 | 1258146 | 2.58E-18  | 0.81 |
| 30205 | 1259434 | 1260478 | 3.51E-58  | 0.87 |
| 30205 | 1265267 | 1265824 | 2.80E-50  | 0.98 |
| 30205 | 1288250 | 1288794 | 2.84E-05  | 0.68 |
| 30206 | 2501    | 2853    | 3.02E-32  | 0.96 |
| 30206 | 3153    | 3415    | 1.04E-20  | 0.89 |
| 30206 | 4892    | 5143    | 6.51E-10  | 0.88 |
| 30206 | 13332   | 14220   | 9.63E-53  | 0.71 |
| 30206 | 14434   | 14793   | 1.95E-10  | 0.79 |
| 30206 | 15055   | 15310   | 1.62E-10  | 0.86 |
| 30206 | 15677   | 16319   | 4.64E-23  | 0.89 |
| 30206 | 17193   | 17619   | 6.99E-31  | 0.91 |
| 30206 | 55860   | 57380   | 9.22E-76  | 0.84 |
| 30206 | 79658   | 80184   | 1.01E-37  | 0.78 |
| 30206 | 93884   | 94343   | 4.98E-09  | 0.71 |
| 30206 | 95243   | 95565   | 4.00E-07  | 0.64 |
| 30206 | 98797   | 99247   | 7.53E-53  | 0.96 |
| 30206 | 99572   | 100357  | 6.84E-102 | 0.92 |
| 30206 | 115136  | 115383  | 1.77E-05  | 0.89 |
| 30206 | 157235  | 157672  | 1.24E-38  | 0.9  |
| 30206 | 157910  | 158292  | 1.08E-12  | 0.91 |
| 30206 | 160725  | 161208  | 6.85E-19  | 0.88 |
| 30206 | 161456  | 162408  | 1.90E-28  | 0.69 |
| 30206 | 187925  | 188403  | 1.03E-11  | 0.76 |
| 30206 | 190491  | 191024  | 3.47E-21  | 0.81 |
| 30206 | 220340  | 220857  | 4.56E-37  | 0.62 |
| 30206 | 223717  | 223941  | 4.56E-31  | 0.94 |
| 30206 | 224559  | 224847  | 1.54E-29  | 0.95 |
| 30206 | 253884  | 254330  | 9.11E-07  | 0.74 |
| 30206 | 261333  | 262368  | 3.62E-37  | 0.73 |
| 30206 | 265555  | 265835  | 1.05E-54  | 0.83 |
| 30206 | 279645  | 280381  | 3.88E-32  | 0.96 |
| 30206 | 280632  | 281216  | 3.85E-40  | 0.93 |
| 30206 | 334260  | 334551  | 4.69E-38  | 0.84 |
| 30206 | 366078  | 366860  | 3.00E-49  | 0.96 |
| 30206 | 367339  | 367554  | 6.61E-44  | 0.91 |
| 30206 | 377695  | 378035  | 1.48E-23  | 0.89 |
| 30206 | 396201  | 397380  | 1.65E-47  | 0.91 |
| 30206 | 431558  | 431812  | 2.10E-15  | 0.69 |
| 30206 | 459196  | 459746  | 5.82E-25  | 0.86 |
| 30206 | 510911  | 511359  | 4.04E-22  | 0.94 |
| 30206 | 517677  | 517910  | 2.93E-07  | 0.83 |
| 30206 | 568219  | 568761  | 2.06E-17  | 0.61 |
| 30206 | 589654  | 590361  | 2.61E-21  | 0.9  |

|       |         |         |          |      |
|-------|---------|---------|----------|------|
| 30206 | 609038  | 609261  | 6.72E-09 | 0.96 |
| 30207 | 210802  | 211058  | 3.21E-09 | 0.9  |
| 30208 | 33344   | 33986   | 9.08E-16 | 0.9  |
| 30208 | 39460   | 39892   | 1.13E-06 | 0.82 |
| 30208 | 39633   | 39975   | 2.62E-08 | 0.78 |
| 30208 | 100974  | 102179  | 3.78E-39 | 0.78 |
| 30208 | 106864  | 107153  | 1.30E-15 | 0.97 |
| 30208 | 187748  | 188011  | 1.54E-11 | 0.88 |
| 30208 | 194595  | 194862  | 2.99E-07 | 0.8  |
| 30208 | 228609  | 228946  | 5.83E-04 | 1    |
| 30208 | 269860  | 270394  | 2.64E-19 | 0.82 |
| 30208 | 334448  | 334944  | 7.16E-12 | 0.79 |
| 30208 | 334727  | 335001  | 1.19E-07 | 0.77 |
| 30208 | 344421  | 345031  | 1.02E-14 | 0.91 |
| 30208 | 345204  | 345413  | 5.53E-18 | 0.77 |
| 30208 | 395968  | 396385  | 9.22E-07 | 0.84 |
| 30208 | 438726  | 439035  | 1.19E-10 | 0.93 |
| 30208 | 463041  | 463279  | 8.48E-05 | 0.85 |
| 30208 | 510300  | 510516  | 4.85E-05 | 0.9  |
| 30208 | 571904  | 572225  | 6.09E-05 | 0.74 |
| 30208 | 584983  | 585255  | 1.37E-04 | 0.9  |
| 30208 | 660080  | 660364  | 2.02E-06 | 0.73 |
| 30208 | 685517  | 685889  | 2.97E-20 | 0.88 |
| 30208 | 770141  | 770463  | 5.12E-09 | 0.87 |
| 30208 | 771114  | 771365  | 1.95E-12 | 0.84 |
| 30208 | 779867  | 780206  | 1.76E-05 | 0.75 |
| 30208 | 808053  | 808900  | 2.16E-12 | 0.9  |
| 30208 | 836058  | 836945  | 3.95E-19 | 0.66 |
| 30208 | 869865  | 870227  | 3.98E-05 | 0.96 |
| 30208 | 884911  | 885158  | 1.39E-05 | 0.87 |
| 30208 | 887531  | 888314  | 3.97E-12 | 0.91 |
| 30208 | 959144  | 959377  | 3.87E-03 | 1    |
| 30208 | 962639  | 962866  | 2.93E-26 | 0.71 |
| 30208 | 1007716 | 1008002 | 3.75E-05 | 0.89 |
| 30208 | 1051579 | 1052261 | 2.49E-29 | 0.88 |
| 30208 | 1054037 | 1055103 | 4.00E-60 | 0.92 |
| 30208 | 1072064 | 1072268 | 4.26E-05 | 0.82 |
| 30208 | 1085264 | 1085632 | 5.18E-06 | 0.81 |
| 30208 | 1093019 | 1093229 | 3.82E-11 | 0.83 |
| 30208 | 1104592 | 1104974 | 2.41E-08 | 0.36 |
| 30208 | 1131481 | 1131712 | 3.07E-07 | 0.82 |
| 30208 | 1145833 | 1146211 | 3.66E-05 | 0.94 |
| 30208 | 1176542 | 1176775 | 6.81E-07 | 0.84 |
| 30208 | 1194966 | 1195190 | 1.27E-09 | 0.84 |
| 30208 | 1216997 | 1217278 | 6.29E-09 | 0.87 |
| 30208 | 1241238 | 1241474 | 1.04E-13 | 0.87 |
| 30208 | 1321663 | 1322050 | 1.11E-08 | 0.92 |
| 30208 | 1328004 | 1328294 | 4.23E-05 | 0.81 |
| 30208 | 1331955 | 1332221 | 1.15E-07 | 0.93 |
| 30208 | 1337330 | 1337539 | 1.12E-03 | 0.84 |
| 30208 | 1341403 | 1341660 | 1.37E-05 | 0.91 |
| 30208 | 1354742 | 1356053 | 8.71E-16 | 0.72 |
| 30208 | 1359007 | 1359776 | 9.06E-37 | 0.83 |

|       |         |         |           |      |
|-------|---------|---------|-----------|------|
| 30208 | 1390639 | 1391090 | 6.20E-19  | 0.85 |
| 30208 | 1444733 | 1444966 | 2.04E-05  | 0.85 |
| 30208 | 1453197 | 1453500 | 5.91E-11  | 0.8  |
| 30208 | 1502023 | 1502269 | 6.25E-07  | 0.96 |
| 30208 | 1519454 | 1519798 | 1.08E-17  | 0.96 |
| 30209 | 31466   | 31805   | 1.04E-08  | 0.93 |
| 30209 | 88170   | 88447   | 1.64E-05  | 0.86 |
| 30209 | 131863  | 132198  | 2.71E-26  | 0.92 |
| 30209 | 184421  | 184733  | 5.82E-32  | 0.93 |
| 30209 | 190679  | 191071  | 4.30E-25  | 0.96 |
| 30209 | 192093  | 192988  | 5.92E-89  | 0.95 |
| 30209 | 202695  | 202922  | 1.73E-52  | 0.96 |
| 30209 | 203696  | 204693  | 4.85E-104 | 0.93 |
| 30209 | 205479  | 206914  | 1.18E-66  | 0.95 |
| 30209 | 211269  | 211915  | 1.07E-14  | 0.94 |
| 30209 | 243255  | 243711  | 2.00E-18  | 0.82 |
| 30209 | 255177  | 255458  | 2.01E-25  | 0.84 |
| 30209 | 257054  | 257409  | 6.41E-10  | 0.73 |
| 30209 | 274405  | 274747  | 4.11E-17  | 0.77 |
| 30209 | 280468  | 280714  | 1.69E-13  | 0.81 |
| 30209 | 300676  | 301625  | 1.40E-23  | 0.78 |
| 30209 | 307194  | 307524  | 5.31E-18  | 0.27 |
| 30209 | 310910  | 311481  | 6.50E-16  | 0.79 |
| 30209 | 314027  | 315491  | 4.90E-69  | 0.74 |
| 30209 | 483984  | 484288  | 1.23E-06  | 0.64 |
| 30209 | 550994  | 551338  | 5.67E-15  | 0.8  |
| 30209 | 551548  | 551917  | 3.14E-57  | 0.96 |
| 30209 | 553953  | 555218  | 1.26E-105 | 0.96 |
| 30209 | 571962  | 572248  | 2.00E-21  | 0.76 |
| 30209 | 586911  | 587182  | 9.78E-14  | 0.88 |
| 30209 | 610548  | 610836  | 1.29E-36  | 0.91 |
| 30209 | 612957  | 613400  | 2.44E-41  | 0.95 |
| 30209 | 615016  | 616086  | 2.74E-35  | 0.8  |
| 30209 | 638134  | 638355  | 7.01E-08  | 0.86 |
| 30209 | 661713  | 662086  | 2.90E-35  | 0.94 |
| 30209 | 697782  | 698843  | 1.13E-49  | 0.85 |
| 30209 | 701528  | 702714  | 1.17E-33  | 0.73 |
| 30209 | 712083  | 712599  | 3.05E-39  | 0.98 |
| 30209 | 718217  | 718488  | 1.61E-40  | 0.93 |
| 30209 | 744358  | 745447  | 3.42E-49  | 0.77 |
| 30209 | 771764  | 772781  | 2.08E-165 | 0.92 |
| 30209 | 774447  | 774867  | 3.51E-27  | 0.71 |
| 30209 | 807856  | 808074  | 6.45E-10  | 0.93 |
| 30209 | 853307  | 853709  | 2.00E-16  | 0.95 |
| 30209 | 930935  | 931478  | 3.99E-10  | 0.93 |
| 30211 | 19743   | 19977   | 2.62E-08  | 0.96 |
| 30211 | 27834   | 28205   | 2.75E-08  | 0.96 |
| 30211 | 36355   | 37195   | 4.77E-08  | 0.63 |
| 30211 | 83584   | 84020   | 3.25E-11  | 0.92 |
| 30211 | 86422   | 86790   | 2.92E-05  | 0.79 |
| 30211 | 104065  | 104451  | 3.11E-04  | 0.89 |
| 30211 | 105843  | 106192  | 6.54E-06  | 0.86 |
| 30211 | 108031  | 108411  | 4.06E-16  | 0.91 |



|       |        |        |           |      |
|-------|--------|--------|-----------|------|
| 30211 | 112412 | 112918 | 1.60E-06  | 0.71 |
| 30211 | 220984 | 221312 | 1.13E-11  | 0.87 |
| 30213 | 13645  | 13951  | 3.35E-04  | 0.84 |
| 30213 | 112400 | 112782 | 2.69E-15  | 0.86 |
| 30213 | 113673 | 114063 | 8.19E-06  | 0.88 |
| 30213 | 126208 | 126446 | 6.40E-102 | 0.9  |
| 30213 | 128663 | 129231 | 3.71E-54  | 0.75 |
| 30213 | 134739 | 134951 | 1.06E-90  | 0.81 |
| 30213 | 142030 | 142755 | 8.72E-84  | 0.85 |
| 30213 | 143133 | 143730 | 9.41E-52  | 0.82 |
| 30213 | 149380 | 149755 | 9.15E-12  | 0.89 |
| 30213 | 159522 | 159952 | 6.34E-04  | 0.83 |
| 30213 | 166237 | 166547 | 2.92E-06  | 0.95 |
| 30213 | 173328 | 174146 | 1.98E-08  | 0.96 |
| 30213 | 193355 | 193578 | 2.92E-04  | 0.7  |
| 30213 | 196272 | 196710 | 3.57E-05  | 1    |
| 30213 | 202316 | 203155 | 1.43E-13  | 0.99 |
| 30213 | 219787 | 220458 | 4.40E-10  | 0.94 |
| 30213 | 231111 | 231533 | 1.55E-06  | 0.91 |
| 30213 | 237757 | 238669 | 6.05E-18  | 0.89 |
| 30213 | 244788 | 245145 | 4.74E-04  | 0.38 |
| 30213 | 252621 | 252913 | 2.49E-03  | 0.76 |
| 30213 | 286060 | 286382 | 2.89E-09  | 0.84 |
| 30213 | 298139 | 298712 | 2.96E-15  | 0.88 |
| 30213 | 304475 | 304703 | 3.46E-06  | 0.89 |
| 30213 | 327324 | 327643 | 1.90E-06  | 0.93 |
| 30213 | 329844 | 330573 | 2.48E-10  | 0.82 |
| 30213 | 346859 | 347098 | 9.28E-08  | 0.92 |
| 30213 | 376416 | 376899 | 1.16E-12  | 0.83 |
| 30213 | 384343 | 384697 | 5.41E-12  | 0.98 |
| 30213 | 385231 | 385510 | 5.22E-06  | 0.86 |
| 30213 | 387122 | 387350 | 3.25E-04  | 0.95 |
| 30213 | 403015 | 403513 | 2.25E-05  | 0.87 |
| 30213 | 408948 | 409273 | 7.01E-11  | 0.85 |
| 30213 | 433295 | 433538 | 0.00E+00  | 0.79 |
| 30213 | 441526 | 441942 | 7.43E-07  | 0.91 |
| 30213 | 443174 | 443397 | 5.74E-14  | 0.81 |
| 30213 | 472344 | 472606 | 3.04E-14  | 0.81 |
| 30213 | 483407 | 483768 | 5.10E-67  | 0.87 |
| 30213 | 495096 | 495340 | 5.41E-09  | 0.84 |
| 30213 | 495191 | 495601 | 3.61E-09  | 0.8  |
| 30213 | 510849 | 511323 | 2.67E-12  | 0.88 |
| 30213 | 539887 | 540533 | 1.78E-17  | 0.65 |
| 30213 | 574342 | 574805 | 4.80E-04  | 0.96 |
| 30213 | 602058 | 602407 | 2.81E-08  | 0.96 |
| 30213 | 602353 | 603031 | 2.64E-24  | 0.95 |
| 30213 | 618165 | 618396 | 1.21E-07  | 0.9  |
| 30213 | 622202 | 622550 | 1.41E-12  | 0.62 |
| 30213 | 627917 | 628180 | 2.20E-14  | 0.82 |
| 30213 | 629089 | 629580 | 9.70E-37  | 0.9  |
| 30213 | 633839 | 634095 | 5.89E-27  | 0.91 |
| 30213 | 637602 | 638407 | 9.36E-14  | 0.61 |
| 30213 | 667703 | 668073 | 1.36E-73  | 0.93 |

|       |         |         |          |      |
|-------|---------|---------|----------|------|
| 30213 | 671154  | 671628  | 2.16E-14 | 0.76 |
| 30213 | 688271  | 689105  | 9.89E-11 | 0.68 |
| 30213 | 719808  | 720404  | 7.83E-59 | 0.96 |
| 30213 | 729471  | 730049  | 8.15E-28 | 0.93 |
| 30213 | 760202  | 760506  | 3.97E-13 | 0.88 |
| 30213 | 768882  | 769376  | 5.10E-44 | 0.79 |
| 30213 | 770706  | 771462  | 1.68E-35 | 0.74 |
| 30213 | 790095  | 790476  | 1.11E-36 | 0.93 |
| 30213 | 790950  | 791300  | 2.47E-14 | 0.76 |
| 30213 | 950357  | 950967  | 1.40E-18 | 0.8  |
| 30213 | 952463  | 952784  | 1.05E-23 | 0.8  |
| 30213 | 975444  | 975819  | 4.45E-22 | 0.91 |
| 30213 | 976022  | 976257  | 3.87E-22 | 0.93 |
| 30213 | 976623  | 977153  | 2.37E-43 | 0.82 |
| 30213 | 1035953 | 1036372 | 5.94E-05 | 0.98 |
| 30213 | 1046508 | 1047266 | 2.25E-20 | 0.9  |
| 30213 | 1060654 | 1060870 | 3.23E-25 | 0.95 |
| 30213 | 1061106 | 1061365 | 4.20E-33 | 0.88 |
| 30213 | 1061655 | 1062821 | 2.55E-60 | 0.91 |
| 30213 | 1065830 | 1066088 | 4.23E-17 | 0.92 |
| 30213 | 1071378 | 1071657 | 4.26E-09 | 0.82 |
| 30213 | 1074159 | 1074648 | 3.77E-18 | 0.92 |
| 30213 | 1087119 | 1087615 | 6.30E-05 | 0.88 |
| 30213 | 1105832 | 1106727 | 3.83E-25 | 1    |
| 30213 | 1108623 | 1108848 | 2.25E-10 | 0.87 |
| 30217 | 4215    | 4529    | 2.09E-34 | 0.79 |
| 30217 | 8442    | 8764    | 3.20E-26 | 0.71 |
| 30217 | 10833   | 11628   | 6.66E-63 | 0.71 |
| 30217 | 34859   | 35593   | 4.16E-53 | 0.85 |
| 30217 | 35952   | 36727   | 1.18E-90 | 0.9  |
| 30217 | 40385   | 40722   | 1.72E-25 | 0.77 |
| 30217 | 40964   | 41424   | 1.79E-17 | 0.92 |
| 30217 | 46417   | 47001   | 5.67E-31 | 0.81 |
| 30217 | 75181   | 75507   | 1.19E-25 | 0.68 |
| 30217 | 82178   | 83422   | 1.22E-50 | 0.75 |
| 30217 | 91682   | 91913   | 3.88E-62 | 0.84 |
| 30217 | 95168   | 95883   | 1.01E-23 | 0.78 |
| 30217 | 98838   | 99324   | 6.43E-38 | 0.83 |
| 30218 | 5589    | 5980    | 9.30E-06 | 0.97 |
| 30218 | 8857    | 9179    | 1.57E-07 | 0.98 |
| 30218 | 54639   | 54970   | 3.12E-07 | 0.72 |
| 30218 | 205319  | 205523  | 3.43E-08 | 0.93 |
| 30218 | 223380  | 224119  | 1.58E-05 | 0.87 |
| 30218 | 393711  | 393970  | 6.54E-06 | 0.79 |
| 30218 | 512312  | 512863  | 3.19E-17 | 0.87 |
| 30218 | 675307  | 675725  | 2.79E-05 | 0.88 |
| 30218 | 791841  | 792097  | 5.68E-06 | 0.96 |
| 30218 | 831425  | 831939  | 9.78E-25 | 0.86 |
| 30218 | 856362  | 856711  | 5.29E-19 | 0.69 |
| 30218 | 926324  | 926928  | 8.05E-07 | 0.92 |
| 30218 | 942833  | 943321  | 1.56E-15 | 0.88 |
| 30218 | 948810  | 949073  | 4.72E-08 | 0.97 |
| 30218 | 956676  | 957090  | 5.80E-16 | 1    |

|       |         |         |           |      |
|-------|---------|---------|-----------|------|
| 30218 | 978829  | 979160  | 5.84E-18  | 0.98 |
| 30218 | 1005269 | 1005491 | 1.59E-05  | 0.92 |
| 30218 | 1033215 | 1033778 | 3.37E-25  | 0.72 |
| 30218 | 1087755 | 1088131 | 4.38E-18  | 0.79 |
| 30218 | 1176236 | 1176916 | 1.19E-16  | 0.88 |
| 30218 | 1178328 | 1178546 | 1.85E-05  | 0.88 |
| 30221 | 36470   | 36704   | 2.48E-15  | 0.9  |
| 30221 | 77837   | 78201   | 1.44E-05  | 0.84 |
| 30221 | 91982   | 92803   | 1.90E-11  | 0.79 |
| 30221 | 94412   | 94734   | 2.46E-04  | 0.76 |
| 30221 | 98879   | 99200   | 7.50E-10  | 0.95 |
| 30221 | 110344  | 110623  | 9.86E-05  | 0.8  |
| 30221 | 141004  | 141213  | 3.42E-17  | 1    |
| 30221 | 183448  | 183648  | 5.26E-08  | 0.83 |
| 30221 | 194265  | 194627  | 5.31E-06  | 0.93 |
| 30221 | 197048  | 197639  | 1.53E-15  | 0.72 |
| 30221 | 215462  | 215941  | 7.84E-15  | 1    |
| 30221 | 225635  | 226271  | 4.35E-23  | 0.6  |
| 30221 | 264120  | 264735  | 5.22E-15  | 0.96 |
| 30221 | 274588  | 274848  | 7.07E-08  | 0.91 |
| 30221 | 282439  | 282741  | 5.48E-14  | 0.88 |
| 30221 | 321185  | 321548  | 5.12E-08  | 0.94 |
| 30221 | 329950  | 330297  | 2.25E-37  | 0.92 |
| 30221 | 339620  | 341068  | 1.48E-147 | 0.93 |
| 30221 | 341627  | 342047  | 1.19E-28  | 0.84 |
| 30221 | 374031  | 374674  | 4.29E-07  | 0.86 |
| 30221 | 386078  | 386306  | 8.05E-55  | 0.85 |
| 30221 | 387707  | 388109  | 1.42E-03  | 0.79 |
| 30221 | 392252  | 392904  | 7.99E-48  | 0.65 |
| 30221 | 406182  | 406495  | 5.01E-15  | 0.85 |
| 30221 | 431325  | 431551  | 5.32E-11  | 0.83 |
| 30221 | 436388  | 436846  | 1.10E-09  | 0.92 |
| 30221 | 465030  | 465652  | 4.88E-42  | 0.94 |
| 30221 | 494376  | 495055  | 6.93E-41  | 0.78 |
| 30221 | 496357  | 496864  | 4.07E-19  | 0.91 |
| 30221 | 570105  | 570400  | 4.21E-34  | 0.89 |
| 30221 | 575692  | 576151  | 1.42E-103 | 0.92 |
| 30221 | 591408  | 591738  | 6.04E-89  | 0.94 |
| 30221 | 662210  | 662432  | 1.80E-32  | 0.97 |
| 30221 | 722327  | 722546  | 5.20E-27  | 0.96 |
| 30221 | 737089  | 737388  | 7.92E-07  | 0.86 |
| 30221 | 743738  | 744259  | 4.20E-14  | 0.76 |
| 30221 | 765235  | 765725  | 3.57E-10  | 0.66 |
| 30221 | 766087  | 766556  | 1.12E-27  | 0.89 |
| 30221 | 768876  | 771418  | 8.76E-114 | 0.78 |
| 30221 | 850246  | 850495  | 2.44E-15  | 0.84 |
| 30221 | 850736  | 851161  | 1.41E-35  | 0.88 |
| 30221 | 851810  | 852124  | 6.15E-23  | 0.91 |
| 30221 | 854965  | 855633  | 1.17E-65  | 0.95 |
| 30221 | 857128  | 857663  | 7.13E-35  | 0.86 |
| 30221 | 866601  | 866970  | 4.69E-12  | 0.88 |
| 30221 | 867861  | 868099  | 3.13E-06  | 0.76 |
| 30221 | 867931  | 868219  | 7.35E-14  | 0.84 |

|       |         |         |           |      |
|-------|---------|---------|-----------|------|
| 30221 | 869642  | 869949  | 3.28E-11  | 0.9  |
| 30221 | 903864  | 904375  | 2.13E-09  | 1    |
| 30221 | 909060  | 909549  | 4.55E-22  | 0.89 |
| 30221 | 935944  | 936185  | 1.37E-09  | 0.79 |
| 30221 | 1012820 | 1013110 | 2.46E-45  | 0.94 |
| 30221 | 1017043 | 1017429 | 1.92E-25  | 0.96 |
| 30221 | 1017671 | 1018134 | 1.03E-11  | 0.84 |
| 30221 | 1054939 | 1055167 | 2.48E-24  | 0.88 |
| 30221 | 1058378 | 1059720 | 2.92E-52  | 0.78 |
| 30221 | 1095699 | 1097151 | 8.28E-87  | 0.84 |
| 30221 | 1097969 | 1098926 | 5.95E-19  | 0.81 |
| 30221 | 1102508 | 1103096 | 5.68E-55  | 0.98 |
| 30221 | 1103388 | 1104563 | 3.56E-52  | 0.9  |
| 30221 | 1104765 | 1106049 | 2.86E-142 | 0.95 |
| 30221 | 1118833 | 1120080 | 4.15E-105 | 0.96 |
| 30221 | 1120365 | 1122141 | 6.53E-261 | 0.96 |
| 30221 | 1138927 | 1139204 | 9.06E-17  | 0.79 |
| 30221 | 1139008 | 1139394 | 4.27E-20  | 0.79 |
| 30221 | 1143057 | 1143870 | 1.68E-21  | 0.84 |
| 30221 | 1144652 | 1145310 | 2.00E-18  | 0.79 |
| 30221 | 1151054 | 1152184 | 4.61E-97  | 0.92 |
| 30221 | 1156820 | 1157590 | 7.17E-12  | 0.61 |
| 30221 | 1157975 | 1158350 | 1.59E-82  | 0.92 |
| 30221 | 1159885 | 1160164 | 2.72E-16  | 0.92 |
| 30221 | 1160452 | 1161096 | 4.22E-94  | 0.96 |
| 30221 | 1169769 | 1170108 | 2.16E-44  | 0.94 |
| 30221 | 1186176 | 1186417 | 5.06E-08  | 0.88 |
| 30221 | 1223043 | 1223296 | 9.34E-11  | 0.79 |
| 30221 | 1234064 | 1234768 | 1.64E-13  | 0.64 |
| 30221 | 1245139 | 1245502 | 9.02E-06  | 0.78 |
| 30221 | 1274623 | 1275692 | 3.48E-57  | 0.89 |
| 30221 | 1410121 | 1410854 | 4.53E-07  | 0.88 |
| 30221 | 1422472 | 1422948 | 1.22E-11  | 0.78 |
| 30221 | 1442679 | 1443278 | 3.20E-13  | 0.84 |
| 30221 | 1455688 | 1456124 | 3.73E-05  | 0.91 |
| 30221 | 1456746 | 1457480 | 1.35E-10  | 0.95 |
| 30221 | 1461291 | 1461691 | 6.97E-06  | 0.88 |
| 30221 | 1474590 | 1474855 | 2.10E-04  | 0.6  |
| 30221 | 1581803 | 1582102 | 6.85E-08  | 0.63 |
| 30221 | 1601167 | 1601624 | 9.60E-40  | 0.94 |
| 30221 | 1615517 | 1615795 | 1.09E-39  | 0.83 |
| 30221 | 1620129 | 1620350 | 1.60E-38  | 0.93 |
| 30221 | 1637620 | 1638082 | 5.60E-35  | 0.95 |
| 30221 | 1679346 | 1679565 | 1.73E-11  | 0.91 |
| 30221 | 1714924 | 1715149 | 1.46E-16  | 0.89 |
| 30221 | 1758398 | 1758725 | 2.40E-06  | 0.9  |
| 30221 | 1772006 | 1772212 | 1.96E-04  | 0.87 |
| 30221 | 1826076 | 1826284 | 5.13E-30  | 0.98 |
| 30221 | 1850852 | 1851342 | 5.67E-41  | 0.95 |
| 30221 | 1852191 | 1852721 | 1.66E-103 | 0.88 |
| 30221 | 1856436 | 1857081 | 3.26E-34  | 0.9  |
| 30221 | 1858595 | 1859087 | 1.24E-31  | 0.91 |
| 30221 | 1864365 | 1864861 | 9.59E-32  | 0.87 |

|       |         |         |           |      |
|-------|---------|---------|-----------|------|
| 30221 | 1867021 | 1867654 | 8.46E-32  | 0.9  |
| 30221 | 1901341 | 1901633 | 2.07E-07  | 0.9  |
| 30221 | 2017404 | 2017797 | 1.50E-11  | 0.98 |
| 30221 | 2063603 | 2063880 | 2.50E-44  | 0.87 |
| 30221 | 2068438 | 2069241 | 3.32E-54  | 0.89 |
| 30221 | 2122875 | 2123234 | 3.40E-06  | 1    |
| 30221 | 2133812 | 2134150 | 2.88E-12  | 0.89 |
| 30221 | 2137122 | 2137475 | 1.34E-34  | 0.95 |
| 30223 | 25434   | 25703   | 1.21E-26  | 0.9  |
| 30223 | 212449  | 212826  | 5.16E-16  | 0.93 |
| 30223 | 290636  | 290922  | 4.17E-05  | 0.88 |
| 30223 | 295578  | 296000  | 3.35E-06  | 0.84 |
| 30223 | 296000  | 296230  | 2.86E-04  | 0.79 |
| 30225 | 34492   | 34945   | 3.22E-28  | 0.95 |
| 30225 | 48328   | 48806   | 5.46E-30  | 0.91 |
| 30225 | 51705   | 52410   | 2.57E-69  | 0.94 |
| 30225 | 52663   | 53914   | 2.33E-115 | 0.92 |
| 30225 | 75740   | 76076   | 3.64E-04  | 1    |
| 30225 | 128771  | 129137  | 1.72E-07  | 0.74 |
| 30225 | 221433  | 221846  | 2.16E-20  | 0.68 |
| 30225 | 243034  | 244150  | 3.16E-52  | 0.94 |
| 30225 | 300990  | 301450  | 3.28E-05  | 0.81 |
| 30225 | 321662  | 322369  | 7.10E-25  | 0.78 |
| 30225 | 353717  | 353933  | 1.41E-12  | 0.94 |
| 30225 | 409697  | 410175  | 4.51E-51  | 0.95 |
| 30225 | 410411  | 410689  | 6.01E-33  | 0.93 |
| 30225 | 410893  | 411396  | 7.14E-43  | 0.92 |
| 30225 | 411617  | 411961  | 3.10E-37  | 0.98 |
| 30225 | 415912  | 416230  | 2.75E-09  | 0.9  |
| 30225 | 437074  | 437466  | 1.99E-03  | 0.9  |
| 30225 | 444440  | 444939  | 3.91E-06  | 0.81 |
| 30225 | 495485  | 495889  | 1.09E-07  | 0.88 |
| 30225 | 507959  | 508734  | 1.70E-18  | 0.79 |
| 30225 | 533720  | 534241  | 1.14E-47  | 0.77 |
| 30225 | 584203  | 584807  | 7.12E-28  | 0.83 |
| 30225 | 589299  | 589993  | 1.96E-90  | 0.94 |
| 30225 | 593235  | 593935  | 1.93E-46  | 0.93 |
| 30225 | 594355  | 594578  | 1.18E-20  | 0.89 |
| 30225 | 612635  | 612949  | 1.46E-05  | 0.88 |
| 30225 | 622046  | 622343  | 8.44E-14  | 0.91 |
| 30225 | 645561  | 645772  | 5.25E-06  | 0.89 |
| 30225 | 701972  | 702274  | 8.39E-11  | 0.85 |
| 30225 | 747625  | 747925  | 2.96E-10  | 0.78 |
| 30225 | 761210  | 761623  | 1.66E-38  | 0.97 |
| 30225 | 766832  | 767081  | 8.81E-04  | 0.8  |
| 30225 | 766881  | 767142  | 2.80E-04  | 0.8  |
| 30225 | 806383  | 808613  | 3.25E-174 | 0.91 |
| 30225 | 813367  | 813913  | 5.14E-14  | 0.98 |
| 30225 | 818176  | 818883  | 4.55E-40  | 0.99 |
| 30225 | 822743  | 823237  | 4.61E-08  | 0.81 |
| 30225 | 822795  | 823239  | 1.69E-07  | 0.86 |
| 30225 | 823937  | 824833  | 3.71E-47  | 0.92 |
| 30225 | 831179  | 831709  | 9.01E-30  | 0.93 |

|       |         |         |          |      |
|-------|---------|---------|----------|------|
| 30225 | 835480  | 835736  | 2.74E-18 | 0.82 |
| 30225 | 836656  | 836981  | 7.24E-29 | 0.91 |
| 30225 | 885447  | 885698  | 2.68E-25 | 0.72 |
| 30225 | 890448  | 891156  | 5.66E-39 | 0.88 |
| 30225 | 891387  | 891882  | 2.93E-25 | 0.96 |
| 30225 | 926576  | 927411  | 4.08E-69 | 0.93 |
| 30225 | 927643  | 928146  | 1.07E-31 | 0.91 |
| 30225 | 929459  | 930180  | 7.71E-59 | 0.88 |
| 30225 | 952112  | 952450  | 9.72E-22 | 0.92 |
| 30225 | 952875  | 953865  | 1.96E-41 | 0.89 |
| 30225 | 954428  | 954917  | 2.14E-33 | 0.92 |
| 30225 | 983700  | 984088  | 2.83E-17 | 0.89 |
| 30225 | 985391  | 985724  | 8.66E-59 | 0.93 |
| 30225 | 988871  | 989760  | 6.09E-48 | 0.77 |
| 30225 | 992278  | 992563  | 2.25E-32 | 0.84 |
| 30225 | 992995  | 993633  | 6.52E-32 | 0.89 |
| 30225 | 993920  | 994666  | 3.74E-47 | 0.9  |
| 30225 | 995504  | 996312  | 4.10E-29 | 0.69 |
| 30225 | 996855  | 997505  | 5.89E-49 | 0.95 |
| 30225 | 999859  | 1000113 | 3.86E-17 | 0.96 |
| 30225 | 1000708 | 1001234 | 7.38E-12 | 0.92 |
| 30225 | 1006096 | 1006632 | 9.18E-60 | 0.92 |
| 30225 | 1006871 | 1007379 | 3.17E-30 | 0.91 |
| 30225 | 1013498 | 1014056 | 1.51E-06 | 0.84 |
| 30225 | 1036397 | 1037160 | 4.98E-09 | 0.71 |
| 30225 | 1098846 | 1099451 | 1.46E-17 | 0.82 |
| 30225 | 1101063 | 1101733 | 1.55E-26 | 0.64 |
| 30225 | 1143140 | 1143513 | 1.28E-19 | 0.71 |
| 30225 | 1153283 | 1153521 | 1.69E-05 | 0.86 |
| 30225 | 1238620 | 1239162 | 1.36E-06 | 0.68 |
| 30225 | 1262734 | 1262993 | 1.09E-18 | 0.85 |
| 30225 | 1264417 | 1264664 | 1.14E-37 | 0.9  |
| 30225 | 1294727 | 1295379 | 2.23E-05 | 0.73 |
| 30225 | 1348658 | 1349274 | 7.20E-50 | 0.81 |
| 30225 | 1349512 | 1350248 | 7.89E-85 | 0.93 |
| 30225 | 1350534 | 1350982 | 2.63E-37 | 0.76 |
| 30225 | 1356355 | 1357120 | 4.03E-24 | 0.89 |
| 30225 | 1506292 | 1506708 | 1.05E-06 | 0.94 |
| 30225 | 1572192 | 1572810 | 2.28E-07 | 0.86 |
| 30225 | 1582246 | 1582749 | 1.65E-13 | 0.94 |
| 30225 | 1598500 | 1599235 | 1.56E-20 | 0.79 |
| 30225 | 1665694 | 1666048 | 1.23E-09 | 0.84 |
| 30225 | 1714624 | 1714921 | 1.21E-12 | 0.99 |
| 30225 | 1725877 | 1726190 | 1.21E-05 | 0.86 |
| 30225 | 1794687 | 1795096 | 1.03E-06 | 0.97 |
| 30225 | 1810938 | 1811253 | 1.62E-04 | 0.88 |
| 30225 | 1842685 | 1843055 | 1.09E-08 | 0.91 |
| 30225 | 1859143 | 1859396 | 4.13E-08 | 1    |
| 30225 | 1940016 | 1940391 | 3.34E-11 | 0.87 |
| 30225 | 1955948 | 1956243 | 2.86E-10 | 0.89 |
| 30225 | 1984791 | 1985176 | 2.63E-19 | 0.67 |
| 30225 | 2003652 | 2004336 | 9.96E-77 | 0.95 |
| 30225 | 2016632 | 2016837 | 7.13E-12 | 0.89 |

|       |         |         |           |      |
|-------|---------|---------|-----------|------|
| 30225 | 2017569 | 2017924 | 3.94E-39  | 0.9  |
| 30225 | 2018685 | 2019459 | 1.58E-62  | 0.94 |
| 30225 | 2021153 | 2022541 | 4.68E-155 | 0.91 |
| 30225 | 2068489 | 2068901 | 3.82E-10  | 0.68 |
| 30225 | 2094963 | 2095467 | 4.13E-16  | 0.9  |
| 30225 | 2102104 | 2102995 | 1.21E-16  | 0.62 |
| 30225 | 2111891 | 2112273 | 1.38E-06  | 0.86 |
| 30225 | 2152581 | 2152847 | 1.00E-16  | 0.92 |
| 30225 | 2172280 | 2172718 | 1.80E-05  | 0.9  |
| 30225 | 2203385 | 2203610 | 2.14E-09  | 0.93 |
| 30225 | 2226354 | 2226575 | 7.20E-03  | 0.93 |
| 30225 | 2255487 | 2255753 | 1.45E-06  | 0.98 |
| 30225 | 2263979 | 2264259 | 5.90E-13  | 0.82 |
| 30225 | 2271242 | 2271735 | 1.83E-07  | 0.75 |
| 30225 | 2337253 | 2337652 | 3.42E-08  | 0.73 |
| 30225 | 2341976 | 2343690 | 1.99E-153 | 0.95 |
| 30225 | 2350224 | 2350452 | 2.16E-13  | 0.86 |
| 30226 | 20768   | 21594   | 5.28E-05  | 0.97 |
| 30226 | 32370   | 33748   | 2.68E-106 | 0.93 |
| 30226 | 33957   | 35808   | 8.31E-134 | 0.93 |
| 30226 | 37550   | 38029   | 1.88E-69  | 0.94 |
| 30226 | 41280   | 41894   | 8.22E-26  | 0.69 |
| 30226 | 65189   | 65647   | 2.16E-11  | 0.62 |
| 30226 | 116254  | 116520  | 1.81E-05  | 0.95 |
| 30226 | 233848  | 234599  | 1.73E-67  | 0.96 |
| 30226 | 330562  | 330944  | 3.44E-158 | 0.95 |
| 30226 | 419009  | 419584  | 1.44E-22  | 0.98 |
| 30226 | 435160  | 436408  | 2.41E-83  | 0.95 |
| 30226 | 437011  | 437501  | 7.77E-36  | 0.96 |
| 30226 | 446243  | 447415  | 6.75E-90  | 0.97 |
| 30226 | 464539  | 465163  | 2.64E-46  | 0.94 |
| 30226 | 465903  | 466310  | 2.56E-43  | 0.93 |
| 30226 | 490134  | 492341  | 5.19E-172 | 0.95 |
| 30226 | 492556  | 493474  | 1.13E-65  | 0.84 |
| 30226 | 493749  | 494543  | 1.45E-63  | 0.93 |
| 30226 | 499204  | 499722  | 6.36E-19  | 0.62 |
| 30226 | 501117  | 501613  | 1.42E-13  | 0.74 |
| 30226 | 501619  | 501976  | 9.24E-17  | 0.8  |
| 30226 | 580924  | 581200  | 1.32E-12  | 0.9  |
| 30226 | 598655  | 599154  | 9.92E-55  | 0.9  |
| 30226 | 614298  | 614591  | 4.16E-05  | 0.88 |
| 30226 | 650286  | 650758  | 7.16E-42  | 0.94 |
| 30226 | 651688  | 652095  | 1.58E-09  | 0.78 |
| 30226 | 656664  | 657233  | 7.57E-08  | 0.62 |
| 30226 | 661940  | 663067  | 2.66E-104 | 0.93 |
| 30226 | 671720  | 672531  | 2.32E-19  | 0.64 |
| 30226 | 720055  | 720374  | 1.02E-05  | 0.92 |
| 30226 | 756069  | 756351  | 3.85E-56  | 0.93 |
| 30226 | 843155  | 843494  | 9.30E-11  | 0.94 |
| 30226 | 862950  | 863412  | 6.90E-28  | 0.97 |
| 30226 | 903341  | 903922  | 1.12E-16  | 0.86 |
| 30226 | 930625  | 931208  | 6.92E-60  | 0.98 |
| 30226 | 935817  | 936211  | 1.68E-40  | 0.94 |

|       |         |         |           |      |
|-------|---------|---------|-----------|------|
| 30226 | 969521  | 969725  | 9.66E-08  | 0.86 |
| 30226 | 993682  | 994353  | 2.65E-08  | 0.84 |
| 30226 | 1043304 | 1043617 | 2.66E-22  | 0.87 |
| 30226 | 1093009 | 1093435 | 5.93E-36  | 0.91 |
| 30226 | 1093698 | 1094098 | 3.21E-53  | 0.93 |
| 30226 | 1114411 | 1114982 | 4.85E-61  | 0.85 |
| 30226 | 1115294 | 1115725 | 4.81E-35  | 0.93 |
| 30226 | 1116972 | 1117550 | 3.87E-59  | 0.94 |
| 30226 | 1117994 | 1119820 | 4.75E-119 | 0.87 |
| 30226 | 1121252 | 1121678 | 5.70E-33  | 0.86 |
| 30226 | 1121996 | 1122623 | 1.14E-80  | 0.88 |
| 30226 | 1189704 | 1189941 | 1.76E-14  | 0.62 |
| 30226 | 1190999 | 1191317 | 5.40E-33  | 0.94 |
| 30226 | 1231599 | 1231808 | 7.11E-18  | 0.93 |
| 30226 | 1244356 | 1244672 | 1.98E-19  | 0.81 |
| 30226 | 1273589 | 1273819 | 1.17E-07  | 0.97 |
| 30226 | 1327777 | 1328163 | 1.71E-15  | 0.92 |
| 30226 | 1339079 | 1339552 | 4.46E-15  | 0.92 |
| 30226 | 1342969 | 1343274 | 3.90E-32  | 0.93 |
| 30226 | 1344022 | 1344459 | 1.19E-10  | 0.82 |
| 30226 | 1346816 | 1347124 | 8.69E-16  | 0.65 |
| 30226 | 1347943 | 1348309 | 1.40E-42  | 0.92 |
| 30226 | 1348702 | 1350107 | 3.19E-73  | 0.93 |
| 30226 | 1351556 | 1353547 | 3.14E-96  | 0.96 |
| 30226 | 1362979 | 1364157 | 9.69E-105 | 0.96 |
| 30226 | 1390102 | 1390613 | 3.14E-07  | 0.84 |
| 30226 | 1400523 | 1400960 | 2.37E-17  | 0.78 |
| 30226 | 1401853 | 1402277 | 2.97E-26  | 0.82 |
| 30226 | 1402591 | 1403019 | 4.00E-18  | 0.78 |
| 30226 | 1404578 | 1404815 | 1.24E-35  | 0.9  |
| 30226 | 1405055 | 1406151 | 7.45E-41  | 0.63 |
| 30226 | 1406775 | 1407111 | 9.82E-34  | 0.9  |
| 30226 | 1409080 | 1409290 | 1.63E-15  | 0.82 |
| 30226 | 1410507 | 1410911 | 5.38E-28  | 0.81 |
| 30226 | 1415302 | 1415728 | 2.34E-20  | 0.68 |
| 30226 | 1431008 | 1431349 | 3.27E-14  | 0.93 |
| 30226 | 1454843 | 1455354 | 1.61E-23  | 0.74 |
| 30226 | 1546407 | 1547219 | 2.03E-25  | 0.75 |
| 30226 | 1547485 | 1548034 | 1.71E-26  | 0.9  |
| 30226 | 1549078 | 1549530 | 2.54E-23  | 0.91 |
| 30226 | 1549821 | 1550165 | 7.32E-10  | 0.84 |
| 30226 | 1556921 | 1557379 | 1.85E-20  | 0.86 |
| 30226 | 1557672 | 1558963 | 4.40E-34  | 0.75 |
| 30226 | 1670974 | 1671373 | 1.07E-27  | 0.91 |
| 30226 | 1691352 | 1692585 | 9.80E-71  | 0.93 |
| 30226 | 1749471 | 1749676 | 5.92E-04  | 0.74 |
| 30226 | 1757096 | 1757432 | 3.27E-08  | 0.9  |
| 30226 | 1758355 | 1758811 | 6.72E-04  | 0.69 |
| 30226 | 1761578 | 1761805 | 3.37E-06  | 0.96 |
| 30226 | 1761759 | 1762244 | 7.70E-22  | 0.71 |
| 30226 | 1762866 | 1763113 | 8.22E-07  | 0.96 |
| 30226 | 1773849 | 1774199 | 1.04E-43  | 0.92 |
| 30226 | 1775086 | 1775581 | 9.94E-23  | 0.85 |



|       |         |         |           |      |
|-------|---------|---------|-----------|------|
| 30226 | 1796315 | 1798185 | 6.42E-56  | 0.82 |
| 30226 | 1805523 | 1806349 | 1.85E-22  | 0.78 |
| 30226 | 1835375 | 1835819 | 1.59E-05  | 1    |
| 30226 | 1844336 | 1845306 | 1.15E-106 | 0.94 |
| 30226 | 1846057 | 1847228 | 5.70E-73  | 0.93 |
| 30226 | 1848750 | 1849121 | 1.23E-36  | 0.83 |
| 30226 | 1861289 | 1861566 | 3.26E-07  | 0.93 |
| 30226 | 1892492 | 1892909 | 9.99E-05  | 0.82 |
| 30226 | 1960229 | 1961214 | 1.17E-78  | 0.91 |
| 30226 | 2020991 | 2021339 | 5.15E-14  | 0.79 |
| 30226 | 2028694 | 2029147 | 6.69E-06  | 0.93 |
| 30226 | 2041131 | 2042662 | 6.48E-152 | 0.84 |
| 30226 | 2091988 | 2092484 | 3.11E-34  | 0.94 |
| 30226 | 2094327 | 2094602 | 2.56E-23  | 0.89 |
| 30226 | 2184246 | 2184548 | 9.63E-11  | 0.96 |
| 30226 | 2203942 | 2204518 | 2.75E-38  | 0.8  |
| 30226 | 2205181 | 2205452 | 4.58E-44  | 0.92 |
| 30226 | 2205724 | 2206323 | 2.40E-69  | 0.83 |
| 30226 | 2207009 | 2207416 | 1.54E-61  | 0.91 |
| 30226 | 2211232 | 2211508 | 1.64E-24  | 0.89 |
| 30226 | 2217479 | 2217903 | 3.03E-13  | 0.86 |
| 30226 | 2317688 | 2317897 | 4.33E-16  | 0.95 |
| 30226 | 2356997 | 2357236 | 2.88E-09  | 0.97 |
| 30226 | 2383689 | 2383972 | 4.34E-06  | 0.71 |
| 30226 | 2383939 | 2384504 | 1.72E-11  | 0.74 |
| 30226 | 2388548 | 2389238 | 1.50E-10  | 0.8  |
| 30226 | 2428183 | 2428519 | 2.09E-06  | 0.93 |
| 30226 | 2549301 | 2549771 | 3.69E-53  | 0.94 |
| 30226 | 2571161 | 2571784 | 4.67E-33  | 0.84 |
| 30226 | 2647848 | 2648074 | 8.60E-17  | 0.65 |
| 30226 | 2667245 | 2667683 | 3.50E-13  | 0.79 |
| 30226 | 2691005 | 2691450 | 4.43E-27  | 0.91 |
| 30226 | 2753170 | 2753417 | 3.01E-49  | 0.96 |
| 30226 | 2803627 | 2803912 | 3.76E-05  | 1    |
| 30244 | 178     | 674     | 2.73E-07  | 0.95 |
| 30273 | 541     | 1304    | 7.58E-11  | 1    |
| 30296 | 3148    | 3659    | 8.06E-08  | 1    |
| 30296 | 3485    | 3857    | 9.08E-04  | 0.93 |
| 30467 | 466     | 1156    | 1.54E-08  | 0.75 |
| 30603 | 89      | 1012    | 6.93E-50  | 0.96 |
| 30710 | 3400    | 4366    | 2.49E-30  | 0.79 |
| 30754 | 1436    | 1798    | 1.45E-19  | 0.88 |
| 30861 | 446     | 823     | 1.25E-04  | 1    |
| 30869 | 9816    | 10125   | 9.91E-28  | 0.79 |
| 30905 | 345     | 1017    | 2.73E-05  | 1    |
| 30993 | 264     | 842     | 1.02E-09  | 0.93 |
| 30999 | 385     | 948     | 1.26E-05  | 0.8  |
| 31177 | 6386    | 6817    | 1.84E-39  | 0.89 |
| 31177 | 7116    | 7494    | 1.78E-23  | 0.76 |
| 31177 | 8185    | 8669    | 5.27E-31  | 0.8  |
| 31177 | 8896    | 9488    | 6.65E-41  | 0.87 |
| 31177 | 9774    | 10970   | 2.98E-96  | 0.92 |
| 31177 | 11236   | 11610   | 6.88E-49  | 0.84 |

|       |      |      |          |      |
|-------|------|------|----------|------|
| 31194 | 1331 | 1813 | 2.57E-07 | 0.96 |
| 31288 | 4    | 703  | 2.08E-40 | 0.87 |
| 31327 | 661  | 1157 | 1.95E-98 | 0.97 |
| 31514 | 831  | 1049 | 2.33E-04 | 0.83 |
| 31534 | 1403 | 1892 | 2.21E-04 | 0.8  |
| 31588 | 997  | 1662 | 2.35E-26 | 0.89 |
| 31740 | 1035 | 1307 | 3.23E-15 | 0.86 |
| 31760 | 407  | 946  | 4.46E-17 | 0.71 |
| 31836 | 252  | 811  | 1.61E-06 | 0.95 |
| 31865 | 195  | 544  | 3.14E-11 | 0.87 |
| 31898 | 578  | 929  | 3.80E-06 | 0.9  |
| 31949 | 762  | 1503 | 5.18E-06 | 1    |
| 31963 | 966  | 1336 | 3.00E-12 | 0.92 |
| 31993 | 414  | 1372 | 1.19E-39 | 0.62 |
| 32019 | 369  | 1032 | 1.78E-14 | 0.62 |
| 32059 | 1724 | 1978 | 3.45E-04 | 0.84 |
| 32125 | 1268 | 1624 | 2.98E-07 | 0.8  |
| 32133 | 726  | 994  | 7.33E-04 | 1    |
| 32150 | 548  | 821  | 1.82E-04 | 1    |
| 32154 | 93   | 625  | 1.25E-11 | 0.91 |
| 32297 | 1176 | 1472 | 8.73E-06 | 0.92 |
| 32297 | 1570 | 1813 | 4.81E-05 | 0.9  |
| 32349 | 959  | 1211 | 1.50E-08 | 0.89 |
| 32412 | 564  | 797  | 2.21E-04 | 1    |
| 32417 | 611  | 1015 | 3.84E-09 | 0.62 |
| 32595 | 83   | 353  | 1.51E-26 | 0.71 |
| 32663 | 20   | 863  | 5.64E-43 | 0.61 |
| 32722 | 404  | 755  | 1.28E-10 | 0.98 |
| 32724 | 247  | 486  | 2.76E-06 | 0.91 |
| 32853 | 58   | 356  | 4.44E-10 | 0.82 |
| 32915 | 23   | 243  | 1.48E-14 | 0.9  |
| 33041 | 1017 | 1340 | 1.57E-06 | 0.89 |
| 33155 | 456  | 1451 | 3.77E-04 | 0.83 |
| 33184 | 143  | 398  | 3.19E-11 | 0.8  |
| 33305 | 2500 | 3037 | 5.17E-44 | 0.91 |
| 33305 | 3394 | 4156 | 2.25E-29 | 0.87 |
| 33305 | 4278 | 4792 | 4.17E-07 | 0.87 |
| 33351 | 382  | 910  | 6.95E-09 | 0.94 |
| 33363 | 61   | 299  | 7.98E-22 | 0.9  |
| 33403 | 609  | 1008 | 2.54E-04 | 0.94 |
| 33508 | 878  | 1353 | 2.80E-13 | 0.86 |
| 33525 | 513  | 829  | 2.47E-07 | 0.85 |
| 33760 | 1124 | 1528 | 1.06E-06 | 0.76 |
| 33843 | 260  | 744  | 3.74E-40 | 0.93 |
| 33854 | 166  | 425  | 1.94E-20 | 0.91 |
| 33931 | 820  | 1184 | 1.00E-07 | 0.61 |
| 33969 | 10   | 249  | 2.04E-08 | 0.89 |
| 33976 | 1027 | 1453 | 3.11E-11 | 1    |
| 34176 | 703  | 1191 | 1.52E-06 | 0.96 |
| 34187 | 762  | 1049 | 1.35E-03 | 1    |
| 34250 | 929  | 1163 | 1.69E-04 | 0.89 |
| 34258 | 205  | 445  | 1.60E-19 | 0.78 |
| 34354 | 207  | 683  | 1.33E-07 | 0.98 |

|       |      |      |          |      |
|-------|------|------|----------|------|
| 34373 | 123  | 393  | 9.38E-09 | 0.81 |
| 34441 | 833  | 1103 | 6.12E-06 | 0.84 |
| 34452 | 365  | 718  | 8.31E-28 | 0.87 |
| 34486 | 355  | 1245 | 1.56E-39 | 0.86 |
| 34512 | 73   | 360  | 1.86E-04 | 0.82 |
| 34512 | 695  | 1161 | 1.35E-05 | 0.85 |
| 34584 | 835  | 1415 | 1.72E-12 | 0.97 |
| 34602 | 1221 | 1635 | 7.24E-09 | 0.95 |
| 34619 | 223  | 656  | 7.44E-04 | 1    |
| 34625 | 93   | 343  | 4.08E-23 | 0.78 |
| 34693 | 250  | 694  | 1.05E-04 | 0.96 |
| 34707 | 758  | 1052 | 5.54E-04 | 0.84 |
| 34786 | 909  | 1501 | 2.94E-54 | 0.94 |
| 34831 | 31   | 294  | 2.43E-24 | 0.81 |
| 34879 | 588  | 940  | 1.70E-07 | 0.83 |
| 34914 | 1384 | 1706 | 5.01E-07 | 0.89 |
| 34989 | 301  | 608  | 4.58E-12 | 0.79 |
| 35047 | 1191 | 1574 | 2.63E-07 | 0.97 |
| 35114 | 499  | 931  | 8.81E-08 | 0.93 |
| 35178 | 249  | 689  | 2.95E-18 | 0.78 |
| 35205 | 497  | 983  | 8.90E-09 | 0.97 |
| 35233 | 782  | 1034 | 2.18E-35 | 0.88 |
| 35268 | 1807 | 2133 | 1.43E-03 | 0.79 |
| 35391 | 756  | 970  | 2.95E-04 | 0.97 |
| 35393 | 675  | 1141 | 3.25E-05 | 0.93 |
| 35476 | 798  | 1284 | 1.16E-06 | 0.7  |
| 35500 | 511  | 957  | 3.74E-24 | 0.85 |
| 35569 | 439  | 689  | 1.35E-05 | 0.85 |
| 35648 | 278  | 1702 | 7.08E-33 | 0.94 |
| 35743 | 23   | 518  | 1.73E-14 | 0.82 |
| 35788 | 294  | 546  | 8.41E-09 | 0.71 |
| 35827 | 883  | 1167 | 4.10E-29 | 0.88 |
| 35919 | 822  | 1256 | 5.44E-07 | 0.98 |
| 35921 | 81   | 512  | 5.00E-04 | 0.92 |
| 35983 | 83   | 362  | 9.35E-12 | 0.72 |
| 36059 | 143  | 423  | 1.03E-07 | 0.73 |
| 36085 | 663  | 1070 | 1.83E-04 | 0.88 |
| 36112 | 2502 | 3183 | 1.23E-04 | 0.88 |
| 36127 | 333  | 580  | 5.87E-06 | 0.87 |
| 36130 | 475  | 820  | 8.12E-11 | 0.84 |
| 36190 | 508  | 749  | 1.19E-12 | 0.78 |
| 36219 | 219  | 765  | 2.54E-06 | 0.97 |
| 36228 | 64   | 555  | 3.09E-15 | 0.85 |
| 36263 | 516  | 763  | 1.06E-04 | 0.27 |
| 36501 | 2402 | 2734 | 8.28E-17 | 0.83 |
| 36546 | 821  | 1141 | 1.02E-06 | 0.84 |
| 36559 | 991  | 1492 | 1.33E-07 | 0.86 |
| 36567 | 79   | 369  | 4.19E-22 | 0.85 |
| 36771 | 2827 | 3744 | 4.38E-30 | 0.8  |
| 36791 | 759  | 1200 | 4.21E-07 | 0.89 |
| 36902 | 538  | 1005 | 2.01E-05 | 1    |
| 37030 | 993  | 1630 | 2.49E-13 | 0.95 |
| 37143 | 239  | 948  | 4.15E-14 | 0.95 |

|       |      |      |           |      |
|-------|------|------|-----------|------|
| 37186 | 2616 | 2958 | 5.70E-11  | 0.94 |
| 37318 | 520  | 1041 | 3.29E-28  | 0.84 |
| 37510 | 437  | 1243 | 1.60E-04  | 0.94 |
| 37512 | 1319 | 1576 | 1.04E-07  | 0.79 |
| 37535 | 124  | 356  | 7.69E-25  | 0.88 |
| 37555 | 342  | 1340 | 6.03E-38  | 0.87 |
| 37567 | 30   | 785  | 1.64E-32  | 0.86 |
| 37607 | 320  | 600  | 3.92E-07  | 0.95 |
| 37798 | 2221 | 2821 | 8.06E-77  | 0.73 |
| 37798 | 3217 | 3576 | 1.10E-32  | 0.9  |
| 37813 | 34   | 511  | 1.09E-08  | 0.81 |
| 37926 | 112  | 616  | 5.23E-13  | 0.83 |
| 38067 | 626  | 1117 | 1.34E-15  | 0.77 |
| 38288 | 4413 | 5722 | 1.62E-42  | 0.78 |
| 38378 | 172  | 490  | 1.64E-09  | 0.97 |
| 38406 | 1810 | 2621 | 4.23E-160 | 0.84 |
| 38502 | 823  | 1179 | 1.38E-09  | 0.97 |
| 38526 | 351  | 1060 | 1.05E-41  | 0.83 |
| 38590 | 2312 | 3054 | 2.72E-22  | 0.73 |
| 38594 | 1267 | 1736 | 2.74E-09  | 0.77 |
| 38770 | 1103 | 1635 | 7.61E-10  | 0.94 |
| 38770 | 3897 | 4244 | 4.48E-08  | 0.97 |
| 38781 | 14   | 275  | 3.31E-18  | 0.91 |
| 38843 | 826  | 1043 | 4.84E-09  | 0.62 |
| 38854 | 1    | 219  | 1.47E-04  | 0.71 |
| 39030 | 260  | 882  | 1.73E-20  | 0.86 |
| 39126 | 332  | 564  | 5.18E-11  | 0.96 |
| 39173 | 7774 | 7989 | 2.17E-09  | 0.78 |
| 39690 | 50   | 1100 | 2.79E-15  | 0.7  |
| 39724 | 12   | 265  | 4.08E-07  | 0.87 |
| 39729 | 2117 | 3217 | 1.26E-30  | 0.92 |
| 39756 | 133  | 987  | 6.55E-12  | 0.88 |
| 39783 | 253  | 502  | 9.42E-11  | 0.95 |
| 39811 | 39   | 903  | 7.09E-31  | 0.67 |
| 39848 | 215  | 453  | 8.14E-05  | 0.87 |
| 39856 | 1286 | 2313 | 6.27E-46  | 0.81 |
| 40207 | 104  | 978  | 5.88E-106 | 0.89 |
| 40223 | 7727 | 8332 | 8.08E-13  | 0.68 |
| 40246 | 235  | 948  | 1.00E-11  | 0.7  |
| 40251 | 686  | 1012 | 7.42E-08  | 0.88 |
| 40272 | 173  | 693  | 7.78E-05  | 0.79 |
| 40374 | 83   | 638  | 3.01E-12  | 0.62 |
| 40375 | 4    | 269  | 1.46E-08  | 0.85 |
| 40456 | 691  | 931  | 1.61E-05  | 0.73 |
| 40571 | 546  | 1083 | 1.62E-17  | 0.8  |
| 40579 | 57   | 380  | 2.23E-22  | 0.83 |
| 40596 | 589  | 890  | 2.08E-06  | 1    |
| 40629 | 350  | 787  | 1.60E-07  | 0.87 |
| 40690 | 661  | 1130 | 6.16E-07  | 0.94 |
| 40703 | 120  | 328  | 3.72E-13  | 0.73 |
| 40941 | 91   | 734  | 2.27E-06  | 0.92 |
| 40970 | 3192 | 3724 | 2.26E-15  | 0.95 |
| 41095 | 378  | 593  | 5.00E-06  | 0.88 |

|       |      |      |          |      |
|-------|------|------|----------|------|
| 41132 | 2254 | 2636 | 2.16E-14 | 0.95 |
| 41132 | 4774 | 5449 | 7.38E-17 | 0.77 |
| 41133 | 5783 | 6463 | 3.84E-51 | 0.94 |
| 41333 | 328  | 693  | 1.43E-05 | 0.79 |
| 41333 | 2201 | 2777 | 9.40E-07 | 0.94 |
| 41333 | 2796 | 3168 | 6.90E-15 | 0.97 |
| 41444 | 1007 | 1488 | 4.12E-15 | 0.97 |
| 41483 | 354  | 671  | 1.44E-04 | 0.63 |
| 41610 | 565  | 1229 | 5.13E-20 | 0.98 |
| 41646 | 477  | 840  | 1.30E-16 | 0.87 |
| 41655 | 2065 | 2330 | 1.24E-17 | 0.96 |
| 41815 | 1366 | 1686 | 2.19E-07 | 0.92 |
| 41833 | 4246 | 4529 | 2.09E-58 | 0.9  |
| 41909 | 5638 | 6301 | 2.46E-49 | 0.86 |
| 41994 | 1428 | 1777 | 1.30E-08 | 0.96 |
| 42022 | 668  | 1012 | 3.42E-08 | 1    |
| 42027 | 1745 | 2138 | 1.29E-08 | 0.83 |
| 42050 | 35   | 463  | 2.43E-05 | 0.9  |
| 42159 | 703  | 1167 | 4.69E-07 | 0.75 |
| 42254 | 890  | 1119 | 6.25E-06 | 0.84 |
| 42413 | 271  | 942  | 1.54E-04 | 0.89 |
| 42475 | 64   | 944  | 4.19E-28 | 0.64 |
| 42502 | 336  | 899  | 8.11E-52 | 0.95 |
| 42519 | 137  | 1153 | 3.86E-31 | 0.81 |
| 42725 | 418  | 924  | 1.26E-04 | 0.93 |
| 42913 | 5708 | 5924 | 3.61E-19 | 0.81 |
| 42917 | 278  | 545  | 3.15E-06 | 0.91 |
| 42926 | 722  | 1552 | 5.32E-22 | 0.93 |
| 42968 | 20   | 432  | 3.90E-06 | 0.63 |
| 42973 | 89   | 426  | 8.97E-04 | 0.95 |
| 42977 | 198  | 626  | 4.02E-05 | 1    |
| 43007 | 277  | 636  | 1.89E-08 | 0.6  |
| 43176 | 907  | 1413 | 2.61E-26 | 0.87 |
| 43304 | 896  | 1467 | 2.02E-52 | 0.89 |
| 43363 | 1559 | 1784 | 1.17E-07 | 0.62 |
| 43540 | 6468 | 7084 | 8.78E-49 | 0.88 |
| 43670 | 9    | 407  | 3.64E-30 | 0.83 |
| 43716 | 526  | 1229 | 1.82E-39 | 0.88 |
| 43733 | 1    | 282  | 7.88E-09 | 0.9  |
| 43972 | 189  | 517  | 1.19E-15 | 0.88 |
| 43996 | 662  | 925  | 1.31E-05 | 0.83 |
| 44032 | 550  | 832  | 1.67E-23 | 0.7  |
| 44062 | 72   | 1036 | 3.90E-23 | 0.78 |
| 44143 | 403  | 668  | 7.45E-07 | 0.72 |
| 44329 | 21   | 384  | 2.08E-16 | 0.74 |
| 44329 | 580  | 900  | 8.50E-09 | 0.65 |
| 44349 | 815  | 1086 | 3.50E-05 | 0.85 |
| 44607 | 15   | 669  | 8.95E-23 | 0.87 |
| 44623 | 90   | 762  | 4.86E-10 | 0.9  |
| 44640 | 40   | 494  | 5.92E-14 | 0.98 |
| 44744 | 29   | 289  | 8.88E-08 | 1    |
| 44838 | 970  | 1546 | 7.71E-44 | 0.95 |
| 44896 | 122  | 485  | 4.32E-04 | 0.95 |

|       |       |       |           |      |
|-------|-------|-------|-----------|------|
| 44944 | 301   | 583   | 6.45E-14  | 0.69 |
| 45065 | 633   | 976   | 1.06E-11  | 0.83 |
| 45065 | 1532  | 2266  | 1.01E-63  | 0.92 |
| 45092 | 3     | 820   | 2.24E-14  | 0.93 |
| 45174 | 2261  | 2749  | 1.15E-07  | 1    |
| 45185 | 107   | 499   | 9.57E-15  | 0.69 |
| 45236 | 461   | 704   | 3.78E-07  | 0.8  |
| 45284 | 437   | 860   | 2.06E-08  | 0.92 |
| 45309 | 267   | 809   | 5.16E-05  | 1    |
| 45361 | 3843  | 4050  | 9.90E-37  | 0.96 |
| 45374 | 2461  | 3029  | 1.67E-10  | 0.97 |
| 45400 | 69    | 501   | 4.59E-10  | 0.87 |
| 45438 | 568   | 1025  | 2.22E-08  | 1    |
| 45562 | 7842  | 8269  | 3.68E-09  | 0.91 |
| 45562 | 8733  | 9093  | 9.63E-06  | 0.78 |
| 45876 | 38    | 844   | 3.01E-52  | 0.96 |
| 45882 | 1153  | 1588  | 1.51E-38  | 0.82 |
| 45882 | 2007  | 2475  | 7.00E-64  | 0.88 |
| 45885 | 66    | 880   | 1.68E-07  | 0.94 |
| 46018 | 5130  | 5345  | 1.13E-18  | 0.9  |
| 46045 | 25    | 399   | 4.21E-09  | 0.92 |
| 46116 | 24    | 369   | 8.21E-14  | 0.7  |
| 46127 | 751   | 1235  | 1.85E-08  | 0.82 |
| 46171 | 382   | 603   | 7.23E-04  | 1    |
| 46175 | 614   | 1022  | 8.10E-06  | 0.95 |
| 46431 | 650   | 971   | 2.20E-11  | 0.75 |
| 46474 | 465   | 1117  | 4.76E-59  | 0.92 |
| 46733 | 62    | 450   | 2.99E-07  | 1    |
| 46922 | 104   | 399   | 1.73E-08  | 0.88 |
| 46922 | 121   | 551   | 7.56E-09  | 0.89 |
| 46968 | 403   | 792   | 8.58E-10  | 0.89 |
| 46989 | 434   | 1032  | 3.04E-139 | 0.93 |
| 47073 | 2     | 593   | 1.04E-14  | 0.92 |
| 47073 | 407   | 1009  | 1.08E-29  | 0.97 |
| 47134 | 4903  | 5271  | 1.87E-05  | 0.92 |
| 47134 | 7792  | 8043  | 5.77E-04  | 0.67 |
| 47171 | 1265  | 1613  | 9.03E-05  | 0.87 |
| 47284 | 3395  | 4220  | 4.44E-33  | 0.62 |
| 47284 | 15066 | 15474 | 2.11E-07  | 0.7  |
| 47335 | 1630  | 1833  | 3.87E-09  | 0.76 |
| 47364 | 589   | 822   | 1.84E-05  | 1    |
| 47457 | 490   | 861   | 6.85E-15  | 1    |
| 47721 | 2350  | 2996  | 3.64E-46  | 0.97 |
| 47823 | 8423  | 8912  | 2.20E-09  | 0.78 |
| 47885 | 444   | 928   | 8.47E-08  | 0.88 |
| 48009 | 1106  | 1345  | 1.23E-07  | 0.83 |
| 48045 | 1019  | 1496  | 1.25E-11  | 0.98 |
| 48081 | 5     | 368   | 1.42E-07  | 0.6  |
| 48098 | 2230  | 2684  | 4.94E-07  | 0.83 |
| 48196 | 226   | 1337  | 1.08E-104 | 0.91 |
| 48455 | 120   | 2827  | 2.41E-111 | 0.85 |
| 48488 | 50    | 842   | 3.80E-26  | 0.66 |
| 48491 | 62    | 648   | 2.07E-07  | 0.67 |

|       |       |       |           |      |
|-------|-------|-------|-----------|------|
| 48578 | 591   | 1037  | 4.77E-07  | 0.81 |
| 48593 | 2486  | 2712  | 7.83E-08  | 0.84 |
| 48705 | 759   | 1254  | 2.79E-29  | 0.94 |
| 48961 | 134   | 386   | 1.22E-07  | 0.72 |
| 48985 | 1283  | 1641  | 9.16E-10  | 0.86 |
| 49012 | 53    | 431   | 6.23E-10  | 0.73 |
| 49069 | 959   | 1425  | 6.36E-23  | 0.86 |
| 49278 | 360   | 650   | 2.33E-06  | 0.91 |
| 49480 | 354   | 677   | 4.63E-08  | 0.95 |
| 49493 | 524   | 978   | 5.38E-08  | 0.93 |
| 49716 | 615   | 1182  | 1.31E-10  | 0.89 |
| 49716 | 2470  | 2886  | 4.15E-06  | 1    |
| 49793 | 51    | 535   | 3.97E-45  | 0.9  |
| 50072 | 618   | 899   | 4.61E-15  | 0.87 |
| 50072 | 1236  | 2552  | 5.67E-57  | 0.79 |
| 50098 | 121   | 397   | 1.17E-10  | 0.72 |
| 50113 | 924   | 1266  | 6.84E-35  | 0.82 |
| 50280 | 1494  | 1772  | 3.37E-06  | 0.93 |
| 50459 | 495   | 786   | 3.35E-08  | 0.96 |
| 50550 | 3316  | 3631  | 6.88E-10  | 0.86 |
| 50557 | 2329  | 2878  | 5.88E-10  | 0.79 |
| 50680 | 598   | 947   | 3.67E-13  | 0.89 |
| 50694 | 832   | 1097  | 1.90E-05  | 0.94 |
| 50700 | 458   | 661   | 7.01E-04  | 0.71 |
| 50749 | 1572  | 2034  | 2.81E-06  | 0.85 |
| 50870 | 135   | 550   | 5.72E-32  | 0.95 |
| 50977 | 668   | 1285  | 7.32E-06  | 1    |
| 51370 | 929   | 1386  | 9.46E-11  | 0.91 |
| 51390 | 8813  | 9381  | 5.43E-32  | 0.86 |
| 51516 | 118   | 816   | 1.36E-31  | 0.95 |
| 51538 | 620   | 958   | 1.35E-19  | 0.62 |
| 51695 | 22    | 441   | 1.04E-14  | 0.72 |
| 51696 | 170   | 632   | 4.06E-50  | 0.89 |
| 51755 | 655   | 979   | 1.32E-28  | 0.88 |
| 52013 | 2097  | 3655  | 1.41E-227 | 0.9  |
| 52051 | 67    | 744   | 1.93E-06  | 0.88 |
| 52218 | 436   | 650   | 1.35E-05  | 0.92 |
| 52317 | 4471  | 5148  | 4.07E-35  | 0.8  |
| 52484 | 166   | 491   | 3.16E-07  | 0.79 |
| 52526 | 8821  | 9074  | 2.06E-05  | 0.74 |
| 52526 | 11675 | 12136 | 8.22E-09  | 0.63 |
| 52526 | 12095 | 12402 | 3.00E-06  | 0.8  |
| 52629 | 2015  | 2311  | 5.42E-13  | 0.84 |
| 52726 | 1793  | 2101  | 8.55E-42  | 0.96 |
| 52751 | 5820  | 6972  | 3.77E-57  | 0.89 |
| 52809 | 81    | 341   | 2.38E-36  | 0.87 |
| 53123 | 79    | 303   | 2.97E-47  | 0.92 |
| 53232 | 179   | 719   | 5.38E-09  | 0.94 |
| 53242 | 21    | 279   | 2.10E-08  | 0.84 |
| 53355 | 715   | 995   | 5.17E-04  | 0.71 |
| 53687 | 620   | 845   | 7.14E-16  | 0.61 |
| 53736 | 339   | 947   | 5.96E-24  | 0.75 |
| 53821 | 631   | 838   | 9.63E-10  | 0.97 |

|       |       |       |           |      |
|-------|-------|-------|-----------|------|
| 53996 | 108   | 904   | 4.66E-30  | 0.9  |
| 54008 | 406   | 1278  | 1.10E-106 | 0.94 |
| 54085 | 106   | 838   | 1.53E-11  | 1    |
| 54190 | 847   | 1117  | 1.35E-08  | 0.93 |
| 54199 | 355   | 780   | 2.44E-11  | 0.95 |
| 54312 | 163   | 672   | 2.97E-39  | 0.99 |
| 54424 | 802   | 1064  | 5.61E-19  | 0.77 |
| 54501 | 463   | 1189  | 1.43E-65  | 0.9  |
| 54546 | 304   | 698   | 2.05E-12  | 0.83 |
| 54592 | 571   | 1098  | 1.40E-08  | 0.94 |
| 54692 | 472   | 778   | 4.36E-04  | 0.83 |
| 54713 | 14    | 354   | 5.02E-07  | 0.98 |
| 54899 | 2194  | 2583  | 4.71E-21  | 0.89 |
| 54996 | 380   | 889   | 5.26E-06  | 0.89 |
| 55072 | 1103  | 1338  | 1.51E-07  | 0.78 |
| 55078 | 1760  | 2147  | 7.11E-14  | 0.84 |
| 55107 | 462   | 1250  | 3.80E-78  | 0.88 |
| 55107 | 1527  | 1953  | 2.41E-47  | 0.96 |
| 55162 | 231   | 1153  | 9.44E-17  | 0.77 |
| 55188 | 321   | 877   | 5.20E-08  | 0.89 |
| 55331 | 13326 | 14114 | 2.10E-20  | 0.9  |
| 55349 | 819   | 1084  | 3.43E-06  | 0.9  |
| 55369 | 794   | 1000  | 1.89E-11  | 0.81 |
| 55616 | 1224  | 1571  | 6.14E-05  | 0.76 |
| 55616 | 3394  | 3856  | 1.12E-11  | 0.73 |
| 55635 | 1110  | 1594  | 1.35E-23  | 0.83 |
| 55678 | 3750  | 4773  | 5.47E-94  | 0.81 |
| 55757 | 896   | 1263  | 4.49E-54  | 0.94 |
| 55802 | 480   | 791   | 8.23E-11  | 0.99 |
| 55802 | 1242  | 1577  | 6.03E-17  | 0.91 |
| 55819 | 4891  | 5806  | 1.33E-10  | 0.78 |
| 55833 | 660   | 1049  | 9.54E-06  | 0.91 |
| 55996 | 391   | 968   | 9.25E-22  | 0.75 |
| 56032 | 1022  | 1370  | 2.63E-05  | 1    |
| 56130 | 780   | 1149  | 2.08E-03  | 0.92 |
| 56193 | 238   | 1730  | 1.41E-77  | 0.94 |
| 56266 | 561   | 784   | 6.45E-28  | 0.89 |
| 56295 | 660   | 1142  | 1.01E-08  | 0.93 |
| 56344 | 466   | 770   | 7.20E-07  | 0.92 |
| 56374 | 833   | 1093  | 2.37E-13  | 0.77 |
| 56420 | 84    | 437   | 7.84E-08  | 0.93 |
| 56453 | 790   | 1173  | 7.72E-27  | 0.77 |
| 56605 | 359   | 812   | 1.74E-10  | 0.97 |
| 56659 | 429   | 951   | 1.20E-10  | 0.71 |
| 56729 | 1078  | 1366  | 1.83E-22  | 0.92 |
| 56742 | 982   | 1288  | 4.84E-07  | 0.92 |
| 56772 | 5     | 530   | 7.38E-12  | 0.93 |
| 56816 | 1440  | 1665  | 9.01E-05  | 0.76 |
| 56826 | 4846  | 5735  | 4.71E-94  | 0.72 |
| 56844 | 767   | 1002  | 2.16E-12  | 0.94 |
| 56957 | 560   | 887   | 6.07E-31  | 0.96 |
| 57062 | 134   | 385   | 6.52E-06  | 0.89 |
| 57106 | 17087 | 17295 | 1.96E-09  | 0.77 |



|       |       |       |           |      |
|-------|-------|-------|-----------|------|
| 57106 | 21437 | 21760 | 1.03E-15  | 0.9  |
| 57245 | 2074  | 2356  | 2.34E-08  | 0.91 |
| 57251 | 473   | 783   | 4.42E-04  | 0.95 |
| 57314 | 940   | 1396  | 1.87E-18  | 0.89 |
| 57529 | 515   | 1401  | 3.87E-09  | 0.88 |
| 57529 | 1488  | 2496  | 5.22E-20  | 0.9  |
| 57565 | 65    | 764   | 1.38E-05  | 0.94 |
| 57586 | 49    | 289   | 1.96E-07  | 0.97 |
| 57604 | 3495  | 4129  | 8.91E-69  | 0.89 |
| 57604 | 6497  | 6985  | 5.32E-58  | 0.88 |
| 57677 | 322   | 824   | 3.38E-36  | 0.87 |
| 57741 | 586   | 952   | 5.40E-12  | 0.83 |
| 57745 | 75    | 386   | 3.36E-23  | 0.64 |
| 57860 | 368   | 1028  | 1.98E-20  | 0.6  |
| 57955 | 28    | 638   | 2.62E-67  | 0.96 |
| 57955 | 1689  | 2029  | 1.25E-49  | 0.95 |
| 57984 | 134   | 961   | 1.43E-16  | 0.85 |
| 58002 | 204   | 434   | 1.41E-03  | 0.32 |
| 58052 | 1     | 250   | 4.60E-06  | 0.89 |
| 58124 | 1827  | 2303  | 5.00E-60  | 0.92 |
| 58124 | 11772 | 12137 | 4.72E-05  | 0.98 |
| 58280 | 346   | 550   | 2.50E-06  | 0.84 |
| 58361 | 2014  | 2417  | 1.09E-20  | 0.77 |
| 58434 | 4124  | 4353  | 1.87E-07  | 0.82 |
| 58434 | 17603 | 17891 | 3.36E-11  | 0.76 |
| 58494 | 1007  | 1287  | 1.12E-11  | 0.98 |
| 58538 | 79    | 467   | 1.36E-11  | 0.95 |
| 58591 | 1566  | 1774  | 3.41E-07  | 0.09 |
| 58624 | 317   | 1030  | 8.58E-13  | 0.74 |
| 58736 | 285   | 771   | 2.66E-09  | 0.77 |
| 58840 | 3388  | 4347  | 9.54E-54  | 0.66 |
| 58840 | 4555  | 5007  | 4.96E-14  | 0.85 |
| 58840 | 5260  | 6124  | 2.66E-28  | 0.85 |
| 58870 | 3023  | 3228  | 3.92E-31  | 0.9  |
| 58870 | 7452  | 7908  | 2.08E-12  | 0.86 |
| 58893 | 100   | 925   | 5.53E-20  | 0.94 |
| 59106 | 93    | 610   | 7.75E-13  | 0.92 |
| 59222 | 706   | 998   | 2.91E-09  | 1    |
| 59231 | 127   | 444   | 1.74E-07  | 0.89 |
| 59304 | 22329 | 22647 | 2.83E-06  | 0.91 |
| 59346 | 1186  | 1588  | 9.79E-23  | 0.9  |
| 59379 | 189   | 489   | 4.07E-09  | 0.61 |
| 59431 | 255   | 536   | 1.13E-06  | 0.93 |
| 59505 | 2910  | 3232  | 1.21E-49  | 0.8  |
| 59505 | 13350 | 14081 | 5.29E-93  | 0.92 |
| 59505 | 16158 | 16375 | 1.12E-32  | 0.89 |
| 59516 | 1598  | 1916  | 3.19E-07  | 0.61 |
| 59561 | 1455  | 1691  | 3.19E-08  | 0.93 |
| 59658 | 25163 | 25429 | 3.57E-06  | 0.89 |
| 59736 | 835   | 1040  | 1.32E-08  | 0.93 |
| 59759 | 107   | 1018  | 2.17E-19  | 0.93 |
| 59796 | 26    | 723   | 2.47E-07  | 0.77 |
| 60263 | 1606  | 2734  | 4.02E-131 | 0.86 |

|       |        |        |          |      |
|-------|--------|--------|----------|------|
| 60269 | 127    | 865    | 7.01E-49 | 0.95 |
| 60361 | 896    | 1281   | 6.37E-41 | 0.9  |
| 60629 | 716    | 1059   | 5.37E-14 | 0.83 |
| 60637 | 2475   | 3083   | 1.34E-16 | 0.65 |
| 60637 | 3287   | 3505   | 1.59E-24 | 0.63 |
| 60637 | 4709   | 4985   | 2.36E-15 | 0.7  |
| 60638 | 56424  | 58130  | 2.30E-57 | 0.9  |
| 60638 | 76514  | 76898  | 8.41E-11 | 0.63 |
| 60638 | 107902 | 108340 | 1.19E-20 | 0.88 |

CG sequence context.

DNA methylation level in endosperm

0.39  
0.22  
0.39  
0.4  
0.35  
0.38  
0.37  
0.36  
0.15  
0.31  
0.37  
0.36  
0.35  
0.25  
0.2  
0.29  
0.33  
0.4  
0.37  
0.35  
0.19  
0.14  
0.36  
0.39  
0.32  
0.4  
0.35  
0.17  
0.39  
0.37  
0.27  
0.37  
0.37  
0.32  
0.36  
0.35  
0.16  
0.37  
0.36  
0.34  
0.36  
0.37  
0.29  
0.24  
0.34  
0.33  
0.39  
0.33  
0.36  
0.23

0.35  
0.17  
0.1  
0.4  
0.38  
0.4  
0.23  
0.33  
0.38  
0.36  
0.38  
0.37  
0.25  
0.39  
0.35  
0.12  
0.26  
0.4  
0.28  
0.38  
0.11  
0.4  
0.16  
0.39  
0.37  
0.2  
0.38  
0.19  
0.19  
0.25  
0.35  
0.21  
0.4  
0.15  
0.37  
0.27  
0.23  
0.29  
0.33  
0.36  
0.18  
0.4  
0.31  
0.27  
0.22  
0.31  
0.39  
0.38  
0.26  
0.36  
0.19  
0.34  
0.21

0.26  
0.31  
0.22  
0.25  
0.34  
0.38  
0.31  
0.11  
0.18  
0.38  
0.39  
0.29  
0.2  
0.38  
0.2  
0.25  
0.28  
0.08  
0.32  
0.18  
0.29  
0.39  
0.38  
0.37  
0.39  
0.4  
0.4  
0.4  
0.36  
0.27  
0.24  
0.2  
0.39  
0.27  
0.4  
0.4  
0.37  
0.39  
0.12  
0.19  
0.4  
0.4  
0.3  
0.34  
0.09  
0.24  
0.4  
0.4  
0.34  
0.23  
0.2  
0.19  
0.21

0.39  
0.38  
0.39  
0.35  
0.18  
0.18  
0.4  
0.4  
0.33  
0.3  
0.32  
0.17  
0.38  
0.22  
0.39  
0.4  
0.32  
0.16  
0.37  
0.32  
0.38  
0.36  
0.38  
0.39  
0.38  
0.38  
0.24  
0.39  
0.27  
0.4  
0.36  
0.2  
0.11  
0.27  
0.33  
0.39  
0.16  
0.4  
0.31  
0.31  
0.32  
0.36  
0.19  
0.1  
0.37  
0.27  
0.23  
0.17  
0.4  
0.39  
0.38  
0.4  
0.14

0.36  
0.18  
0.36  
0.25  
0.4  
0  
0.19  
0.26  
0.39  
0.3  
0.36  
0.29  
0.34  
0.4  
0.35  
0.38  
0.24  
0.26  
0.22  
0.16  
0.1  
0.21  
0.24  
0.16  
0.39  
0.11  
0.1  
0.3  
0.18  
0.15  
0.24  
0.4  
0.26  
0.4  
0.16  
0.19  
0.36  
0.33  
0.31  
0.28  
0.35  
0.31  
0.22  
0.37  
0.09  
0.37  
0.3  
0.32  
0.3  
0.28  
0.21  
0.31  
0.19

0.37  
0.4  
0.38  
0.33  
0.26  
0.36  
0.3  
0.25  
0.31  
0.4  
0.36  
0.37  
0.39  
0.32  
0.31  
0.2  
0.37  
0.24  
0.25  
0.14  
0.39  
0.29  
0.38  
0.4  
0.22  
0.39  
0.38  
0.33  
0.4  
0.16  
0.34  
0.17  
0.19  
0.4  
0.31  
0.35  
0.4  
0.36  
0.4  
0.35  
0.17  
0.35  
0.36  
0.1  
0.38  
0.25  
0.1  
0.29  
0.3  
0.35  
0.29  
0.28  
0.18



0.21  
0.24  
0.25  
0.22  
0.2  
0.35  
0.4  
0.28  
0.32  
0.38  
0.33  
0.33  
0.25  
0.26  
0.36  
0.14  
0.23  
0.4  
0.38  
0.18  
0.16  
0.36  
0.38  
0.39  
0.29  
0.21  
0.38  
0.39  
0.39  
0.39  
0.4  
0.36  
0.36  
0.14  
0.16  
0.39  
0.37  
0.25  
0.39  
0.37  
0.16  
0.31  
0.37  
0.28  
0.37  
0.37  
0.37  
0.37  
0.32  
0.29  
0.33  
0.32  
0.32  
0.37

0.4  
0.15  
0.35  
0.33  
0.39  
0.39  
0.33  
0.2  
0.25  
0.22  
0.17  
0.4  
0.38  
0.35  
0.33  
0.2  
0.25  
0.22  
0.3  
0.27  
0.29  
0.26  
0.34  
0.39  
0.22  
0.19  
0.18  
0.38  
0.28  
0.33  
0.08  
0.16  
0.39  
0.39  
0.35  
0.27  
0.39  
0.36  
0.19  
0.4  
0.26  
0.26  
0.29  
0.19  
0.39  
0.32  
0.34  
0.39  
0.22  
0.37  
0.4  
0.18  
0.32

0.35  
0.29  
0.22  
0.4  
0.4  
0.25  
0.39  
0.3  
0.37  
0.22  
0.19  
0.18  
0.39  
0.38  
0.33  
0.15  
0.2  
0.37  
0.2  
0.4  
0.4  
0.38  
0.25  
0.37  
0.12  
0.29  
0.18  
0.34  
0.4  
0.4  
0.33  
0.29  
0.39  
0.4  
0.37  
0.14  
0.3  
0.21  
0.36  
0.39  
0.4  
0.29  
0.3  
0.32  
0.25  
0.39  
0.39  
0.4  
0.35  
0.38  
0.39  
0.35  
0.19

0.27  
0.38  
0.25  
0.2  
0.11  
0.2  
0.27  
0.25  
0.4  
0.27  
0.32  
0.39  
0.23  
0.18  
0.36  
0.19  
0.3  
0.2  
0.35  
0.4  
0.29  
0.34  
0.37  
0.24  
0.22  
0.22  
0.25  
0.31  
0.14  
0.35  
0.37  
0.33  
0.39  
0.37  
0.13  
0.23  
0.24  
0.23  
0.15  
0.31  
0.21  
0.16  
0.32  
0.36  
0.4  
0.31  
0.36  
0.4  
0.38  
0.37  
0.31  
0.34  
0.38

0.36  
0.2  
0.4  
0.25  
0.17  
0.31  
0.17  
0.08  
0.12  
0.2  
0.38  
0.22  
0.25  
0.34  
0.37  
0.38  
0.24  
0.38  
0.38  
0.12  
0.39  
0.34  
0.36  
0.4  
0.3  
0.4  
0.22  
0.34  
0.08  
0.39  
0.21  
0.39  
0.34  
0.4  
0.38  
0.34  
0.35  
0.36  
0.3  
0.31  
0.3  
0.39  
0.36  
0.14  
0.35  
0.25  
0.33  
0.36  
0.35  
0.4  
0.36  
0.36  
0.24

0.39  
0.26  
0.33  
0.21  
0.4  
0.4  
0.21  
0.36  
0.4  
0.31  
0.22  
0.31  
0.34  
0.4  
0.33  
0.21  
0.15  
0.33  
0.18  
0.32  
0.3  
0.12  
0.33  
0.15  
0.23  
0.37  
0.28  
0.16  
0.15  
0.19  
0.38  
0.4  
0.33  
0.33  
0.35  
0.37  
0.32  
0.37  
0.32  
0.03  
0.19  
0.24  
0.17  
0.25  
0.37  
0.37  
0.4  
0.34  
0.34  
0.35  
0.23  
0.17  
0.2

0.16  
0.14  
0.33  
0.26  
0.38  
0.39  
0.39  
0.4  
0.33  
0.4  
0.37  
0.27  
0.29  
0.35  
0.19  
0.36  
0.26  
0.39  
0.34  
0.39  
0.34  
0.38  
0.17  
0.11  
0.4  
0.39  
0.35  
0.4  
0.33  
0.4  
0.29  
0.29  
0.38  
0.3  
0.28  
0.24  
0.03  
0.2  
0.4  
0.4  
0.34  
0.38  
0.3  
0.36  
0.38  
0.39  
0.39  
0.33  
0.4  
0.38  
0.4  
0.19  
0.4

0.31  
0.24  
0.18  
0.4  
0.23  
0.35  
0.33  
0.26  
0.27  
0.08  
0.38  
0.27  
0.07  
0.08  
0.35  
0.21  
0.22  
0.37  
0.4  
0.33  
0.29  
0.29  
0.31  
0.4  
0.39  
0.36  
0.38  
0.32  
0.31  
0.05  
0.37  
0.14  
0.26  
0.21  
0.08  
0.35  
0.3  
0.15  
0.39  
0.12  
0.18  
0.16  
0.2  
0.4  
0.35  
0.4  
0.28  
0.4  
0.37  
0.4  
0.27  
0.28  
0.3



0.37  
0.38  
0.4  
0.39  
0.25  
0.39  
0.19  
0.13  
0.25  
0.39  
0.1  
0.23  
0.22  
0.32  
0.4  
0.33  
0.39  
0.35  
0.38  
0.23  
0.37  
0.39  
0.27  
0.18  
0.34  
0.26  
0.21  
0.4  
0.35  
0.38  
0.28  
0.27  
0.32  
0.13  
0.1  
0.4  
0.2  
0.3  
0.2  
0.4  
0.33  
0.27  
0.23  
0.29  
0.4  
0.09  
0.35  
0.3  
0.25  
0.19  
0.38  
0.4  
0.34

0.34  
0.34  
0.15  
0.29  
0.34  
0.25  
0.39  
0.19  
0.27  
0.18  
0.39  
0.25  
0.39  
0.36  
0.29  
0.35  
0.29  
0.34  
0.29  
0.38  
0.37  
0.34  
0.25  
0.17  
0.34  
0.27  
0.4  
0.26  
0.35  
0.3  
0.2  
0.4  
0.39  
0.27  
0.3  
0.39  
0.32  
0.33  
0.37  
0.24  
0.33  
0.37  
0.27  
0.4  
0.17  
0.34  
0.06  
0.13  
0.37  
0.39  
0.36  
0.21  
0.34

0.1  
0.22  
0.34  
0.11  
0.22  
0.38  
0.38  
0.1  
0.4  
0.4  
0.38  
0.3  
0.28  
0.32  
0.27  
0.14  
0.17  
0.35  
0.15  
0.18  
0.37  
0.31  
0.16  
0.4  
0.38  
0.33  
0.4  
0.35  
0.31  
0.28  
0.4  
0.28  
0.4  
0.26  
0.12  
0.16  
0.13  
0.2  
0.18  
0.31  
0.4  
0.38  
0.28  
0.35  
0.16  
0.38  
0.29  
0.23  
0.35  
0.22  
0.22  
0.26  
0.14

0.36  
0.3  
0.22  
0.3  
0.21  
0.26  
0.37  
0.36  
0.3  
0.36  
0.19  
0.25  
0.39  
0.4  
0.4  
0.33  
0.36  
0.38  
0.35  
0.33  
0.26  
0.13  
0.28  
0.22  
0.13  
0.21  
0.21  
0.22  
0.26  
0.36  
0.11  
0.12  
0.3  
0.36  
0.39  
0.36  
0.32  
0.39  
0.4  
0.4  
0.21  
0.39  
0.33  
0.4  
0.37  
0.39  
0.32  
0.15  
0.38  
0.4  
0.4  
0.21  
0.37

0.4  
0.25  
0.37  
0.09  
0.4  
0.39  
0.34  
0.32  
0.21  
0.39  
0.22  
0.25  
0.27  
0.37  
0.31  
0.39  
0.12  
0.27  
0.05  
0.37  
0.33  
0.2  
0.37  
0.23  
0.23  
0.18  
0.28  
0.05  
0.34  
0.17  
0.3  
0.29  
0.13  
0.35  
0.1  
0.39  
0.4  
0.34  
0.4  
0.4  
0.09  
0.35  
0.24  
0.4  
0.15  
0.37  
0.24  
0.35  
0.38  
0.38  
0.4  
0.38  
0.4

0.28  
0.39  
0.36  
0.32  
0.39  
0.4  
0.26  
0.25  
0.27  
0.11  
0.35  
0.22  
0.32  
0.33  
0.28  
0.3  
0.29  
0.32  
0.24  
0.16  
0.07  
0.18  
0.22  
0.28  
0.22  
0.21  
0.3  
0.4  
0.39  
0.25  
0.22  
0.31  
0.36  
0.33  
0.15  
0.21  
0.19  
0.27  
0.16  
0.3  
0.39  
0.36  
0.4  
0.32  
0.27  
0.27  
0.27  
0.28  
0.4  
0.35  
0.11  
0.17  
0.39

0.19  
0.35  
0.29  
0.26  
0.31  
0.18  
0.14  
0.19  
0.39  
0.36  
0.38  
0.4  
0.39  
0.2  
0.32  
0.31  
0.33  
0.19  
0.08  
0.23  
0.25  
0.2  
0.11  
0.15  
0.4  
0.4  
0.15  
0.19  
0.38  
0.37  
0.4  
0.38  
0.4  
0.35  
0.39  
0.38  
0.36  
0.39  
0.37  
0.2  
0.33  
0.39  
0.22  
0.3  
0.13  
0.13  
0.27  
0.3  
0.4  
0.4  
0.32  
0.38  
0.37

0.3  
0.4  
0.4  
0.27  
0.12  
0.35  
0.4  
0.34  
0.39  
0.4  
0.36  
0.4  
0.26  
0.39  
0.19  
0.2  
0.07  
0.15  
0.23  
0.39  
0.17  
0.17  
0.33  
0.35  
0.36  
0.09  
0.13  
0.37  
0.29  
0.22  
0.29  
0.16  
0.22  
0.34  
0.27  
0.4  
0.28  
0.35  
0.28  
0.36  
0.4  
0.26  
0.25  
0.26  
0.22  
0.27  
0.31  
0.25  
0.34  
0.3  
0.28  
0.35  
0.37



0.04  
0.3  
0.35  
0.4  
0.32  
0.39  
0.38  
0.24  
0.35  
0.37  
0.38  
0.05  
0.28  
0.17  
0.16  
0.09  
0.3  
0.4  
0.38  
0.27  
0.34  
0.27  
0.34  
0.09  
0.2  
0.39  
0.4  
0.22  
0.19  
0.2  
0.31  
0.33  
0.39  
0.39  
0.27  
0.4  
0.4  
0.4  
0.28  
0.4  
0.38  
0.29  
0.12  
0.35  
0.07  
0.36  
0.37  
0.4  
0.39  
0.16  
0.24  
0.34  
0.37

0.36  
0.39  
0.39  
0.35  
0.19  
0.21  
0.4  
0.39  
0.39  
0.36  
0.16  
0.18  
0.1  
0.16  
0.22  
0.31  
0.39  
0.33  
0.25  
0.25  
0.06  
0.16  
0.15  
0.38  
0.31  
0.37  
0.22  
0.27  
0.34  
0.33  
0.3  
0.16  
0.09  
0.27  
0.1  
0.35  
0.31  
0.11  
0.12  
0.06  
0.4  
0.39  
0.36  
0.28  
0.39  
0.31  
0.4  
0.4  
0.4  
0.38  
0.39  
0.36  
0.11

0.31  
0.26  
0.22  
0.16  
0.38  
0.4  
0.27  
0.34  
0.4  
0.39  
0.29  
0.37  
0.33  
0.2  
0.33  
0.23  
0.24  
0.37  
0.13  
0.4  
0.33  
0.28  
0.19  
0.3  
0.37  
0.4  
0.23  
0.19  
0.25  
0.31  
0.4  
0.38  
0.32  
0.38  
0.37  
0.39  
0.22  
0.35  
0.09  
0.35  
0.38  
0.37  
0.39  
0.39  
0.26  
0.4  
0.21  
0.4  
0.36  
0.39  
0.4  
0.38  
0.3

0.35  
0.36  
0.35  
0.36  
0.34  
0.36  
0.18  
0.36  
0.4  
0.4  
0.32  
0.15  
0.29  
0.3  
0.12  
0.32  
0.32  
0.18  
0.21  
0.18  
0.27  
0.25  
0.37  
0.31  
0.32  
0.32  
0.08  
0.18  
0.3  
0.31  
0.32  
0.24  
0.29  
0.35  
0.26  
0.34  
0.34  
0.35  
0.38  
0.11  
0.11  
0.2  
0.4  
0.39  
0.38  
0.34  
0.4  
0.4  
0.35  
0.27  
0.4  
0.25  
0.16

0.19  
0.15  
0.32  
0.22  
0.39  
0.15  
0.14  
0.4  
0.36  
0.4  
0.16  
0.26  
0.21  
0.38  
0.37  
0.39  
0.09  
0.29  
0.32  
0.22  
0.3  
0.39  
0.34  
0.17  
0.33  
0.07  
0.25  
0.39  
0.09  
0.4  
0.37  
0.36  
0.37  
0.39  
0.4  
0.36  
0.4  
0.4  
0.32  
0.38  
0.36  
0.39  
0.29  
0.34  
0.37  
0.36  
0.23  
0.22  
0.26  
0.36  
0.4  
0.4  
0.34

0.08  
0.23  
0.11  
0.17  
0.12  
0.11  
0.28  
0.26  
0.32  
0.4  
0.24  
0.39  
0.15  
0.38  
0.32  
0.08  
0.38  
0.39  
0.36  
0.29  
0.12  
0.37  
0.36  
0.33  
0.39  
0.33  
0.37  
0.17  
0.08  
0.39  
0.4  
0.38  
0.4  
0.37  
0.35  
0.37  
0.21  
0.33  
0.28  
0.32  
0.35  
0.37  
0.35  
0.16  
0.39  
0.35  
0.24  
0.31  
0.25  
0.33  
0.37  
0.37  
0.12

0.17  
0.37  
0.32  
0.33  
0.14  
0.4  
0.14  
0.23  
0.23  
0.23  
0.39  
0.35  
0.22  
0.29  
0.26  
0.17  
0.33  
0.27  
0.32  
0.36  
0.26  
0.13  
0.33  
0.21  
0.37  
0.09  
0.39  
0.2  
0.29  
0.37  
0.38  
0.36  
0.28  
0.3  
0.3  
0.25  
0.31  
0.14  
0.31  
0.36  
0.37  
0.31  
0.33  
0.37  
0.35  
0.36  
0.33  
0.19  
0.16  
0.39  
0.35  
0.14  
0.27

0.07  
0.39  
0.22  
0.32  
0.27  
0.2  
0.26  
0.36  
0.35  
0.4  
0.25  
0.4  
0.26  
0.28  
0.14  
0.17  
0.34  
0.35  
0.19  
0.32  
0.39  
0.14  
0.37  
0.38  
0.39  
0.25  
0.22  
0.19  
0.37  
0.24  
0.4  
0.39  
0.4  
0.39  
0.26  
0.39  
0.19  
0.06  
0.32  
0.39  
0.33  
0.26  
0.27  
0.28  
0.2  
0.39  
0.4  
0.33  
0.39  
0.3  
0.32  
0.24  
0.38



0.27  
0.37  
0.38  
0.29  
0.4  
0.28  
0.38  
0.31  
0.13  
0.08  
0.23  
0.34  
0.39  
0.36  
0.37  
0.28  
0.38  
0.4  
0.38  
0.37  
0.3  
0.35  
0.37  
0.34  
0.25  
0.35  
0.39  
0.3  
0.23  
0.17  
0.09  
0.4  
0.31  
0.4  
0.4  
0.36  
0.38  
0.39  
0.27  
0.38  
0.29  
0.32  
0.31  
0.39  
0.24  
0.22  
0.2  
0.16  
0.05  
0.28  
0.18  
0.2  
0.18

0.39  
0.18  
0.21  
0.23  
0.15  
0.16  
0.32  
0.39  
0.39  
0.15  
0.38  
0.31  
0.38  
0.21  
0.26  
0.33  
0.25  
0.35  
0.4  
0.31  
0.14  
0.38  
0.33  
0.33  
0.19  
0.36  
0.24  
0.27  
0.21  
0.3  
0  
0.4  
0.4  
0.39  
0.33  
0.31  
0.35  
0.37  
0.39  
0.19  
0.31  
0.17  
0.37  
0.13  
0.21  
0.21  
0.2  
0.18  
0.4  
0.21  
0.2  
0.37  
0.4

0.23  
0.03  
0.22  
0.26  
0.25  
0.4  
0.34  
0.15  
0.22  
0.38  
0.14  
0.22  
0.39  
0.28  
0.37  
0.19  
0.39  
0.14  
0.4  
0.4  
0.27  
0.34  
0.34  
0.38  
0.32  
0.31  
0.08  
0.4  
0.37  
0.3  
0.37  
0.14  
0.18  
0.35  
0.35  
0.38  
0.4  
0.18  
0.39  
0.26  
0.25  
0.24  
0.36  
0.34  
0.32  
0.32  
0.35  
0.38  
0.35  
0.17  
0.39  
0.27  
0.17

0.39  
0.29  
0.37  
0.35  
0.34  
0.38  
0.3  
0.19  
0.39  
0.15  
0.4  
0.4  
0.29  
0.16  
0.17  
0.36  
0.2  
0.17  
0.34  
0.35  
0.39  
0.22  
0.24  
0.17  
0.27  
0.35  
0.11  
0.15  
0.11  
0.37  
0.24  
0.12  
0.2  
0.37  
0.29  
0.39  
0.29  
0.3  
0.34  
0.36  
0.3  
0.28  
0.37  
0.36  
0.4  
0.1  
0.34  
0.38  
0.3  
0.26  
0.21  
0.25  
0.26

0.26  
0.17  
0.38  
0.4  
0.35  
0.16  
0.13  
0.3  
0.4  
0.4  
0.22  
0.4  
0.28  
0.29  
0.34  
0.38  
0.12  
0.35  
0.15  
0.19  
0.35  
0.28  
0.33  
0.39  
0.39  
0.29  
0.21  
0.18  
0.27  
0.17  
0.32  
0.13  
0.29  
0.16  
0.34  
0.17  
0.39  
0.31  
0.23  
0.3  
0.24  
0.28  
0.4  
0.31  
0.38  
0.4  
0.25  
0.22  
0.37  
0.35  
0.38  
0.36  
0.39

0.36  
0.29  
0.23  
0.38  
0  
0.38  
0.19  
0.38  
0.38  
0.22  
0.37  
0.4  
0.38  
0.32  
0.17  
0.39  
0.31  
0.24  
0.37  
0.29  
0.39  
0.12  
0.2  
0.4  
0.39  
0.19  
0.37  
0.17  
0.77  
0.8  
0.13  
0.35  
0.27  
0.37  
0.22  
0.13  
0.14  
0.38  
0.38  
0.29  
0.25  
0.28  
0.15  
0.37  
0  
0.37  
0.35  
0.36  
0.37  
0.4  
0.15  
0.35  
0.4

0.28  
0.17  
0.36  
0.39  
0.38  
0.37  
0.37  
0.2  
0.13  
0.4  
0.36  
0.24  
0.34  
0.32  
0.33  
0.21  
0.3  
0.39  
0.05  
0.39  
0.4  
0.38  
0.36  
0.33  
0.22  
0.39  
0.34  
0.23  
0.3  
0.13  
0.21  
0.34  
0.29  
0.38  
0.2  
0.39  
0.38  
0.31  
0.4  
0.37  
0.26  
0.18  
0.27  
0.22  
0.24  
0.2  
0.28  
0.35  
0.24  
0.35  
0.15  
0.26  
0.28

0.38  
0.31  
0.29  
0.37  
0.38  
0.37  
0.14  
0.24  
0.21  
0.22  
0.23  
0.1  
0.18  
0.37  
0.27  
0.34  
0.11  
0.39  
0.24  
0.18  
0.23  
0.32  
0.26  
0.27  
0.26  
0.4  
0.25  
0.22  
0.16  
0.14  
0.26  
0.35  
0.33  
0.18  
0.25  
0.19  
0.37  
0.17  
0.1  
0.18  
0.36  
0.37  
0.37  
0.23  
0.32  
0.3  
0.19  
0.39  
0.14  
0.4  
0.38  
0.22  
0.21



0.33  
0.36  
0.39  
0.31  
0.37  
0.36  
0.38  
0.39  
0.39  
0.38  
0.33  
0.4  
0.21  
0.39  
0.26  
0.38  
0.3  
0.22  
0.18  
0.2  
0.14  
0.13  
0.4  
0.39  
0.35  
0.2  
0.4  
0.35  
0.38  
0.37  
0.31  
0.39  
0.31  
0.4  
0.09  
0.1  
0.25  
0.27  
0.36  
0.25  
0.4  
0.4  
0.4  
0.38  
0.32  
0.12  
0.17  
0.13  
0.16  
0.29  
0.39  
0.29  
0.22

0.4  
0.37  
0.08  
0.26  
0.31  
0.18  
0.36  
0.35  
0.4  
0.4  
0.38  
0.25  
0.25  
0.2  
0.23  
0.39  
0.38  
0.36  
0.34  
0.35  
0.32  
0.38  
0.4  
0.28  
0.33  
0.3  
0.23  
0.26  
0.39  
0.39  
0.1  
0.22  
0.37  
0.27  
0.39  
0.36  
0.21  
0.27  
0.28  
0.38  
0.4  
0.35  
0.4  
0.18  
0.27  
0.36  
0.38  
0.32  
0.3  
0.36  
0.32  
0.35  
0.29

0.13  
0.38  
0.28  
0.35  
0.35  
0.34  
0.34  
0.3  
0.21  
0.25  
0.37  
0.39  
0.4  
0.36  
0.37  
0.39  
0.29  
0.29  
0.25  
0.31  
0.39  
0.36  
0.39  
0.4  
0.4  
0.4  
0.28  
0.39  
0.19  
0.3  
0.28  
0.27  
0.18  
0.21  
0.38  
0.3  
0.22  
0.28  
0.23  
0.37  
0.37  
0.18  
0.22  
0.35  
0.4  
0.28  
0.14  
0.32  
0.13  
0.39  
0.4  
0.28  
0.25

0.31  
0.31  
0.22  
0.39  
0.12  
0.4  
0.2  
0.37  
0.33  
0.16  
0.06  
0.2  
0.31  
0.34  
0.39  
0.23  
0.37  
0.38  
0.2  
0.38  
0.35  
0.4  
0.23  
0.33  
0.27  
0.23  
0.32  
0.38  
0.24  
0.37  
0.17  
0.37  
0.38  
0.39  
0.12  
0.34  
0.3  
0.29  
0.34  
0.4  
0.4  
0.38  
0.38  
0.34  
0.22  
0.15  
0.11  
0.36  
0.39  
0.06  
0.39  
0.34  
0

0.14  
0.28  
0.4  
0.23  
0.13  
0.39  
0.15  
0.16  
0.16  
0.32  
0.28  
0.4  
0.35  
0.32  
0.4  
0.36  
0.28  
0.25  
0.3  
0.38  
0.36  
0.4  
0.4  
0.16  
0.38  
0.21  
0.19  
0.21  
0.14  
0.17  
0.16  
0.35  
0.38  
0.34  
0.35  
0.24  
0.39  
0.37  
0.35  
0.36  
0.39  
0.38  
0.38  
0.38  
0.25  
0.14  
0.08  
0.4  
0.31  
0.39  
0.35  
0.36  
0.29

0.27  
0.26  
0.04  
0.19  
0.17  
0.4  
0.15  
0.13  
0.22  
0.15  
0.27  
0.33  
0.39  
0.33  
0.32  
0.32  
0.39  
0.36  
0.28  
0.24  
0.33  
0.39  
0.28  
0.35  
0.39  
0.39  
0.38  
0.16  
0.15  
0.36  
0.36  
0.39  
0.09  
0.27  
0.05  
0.16  
0.18  
0.36  
0.17  
0.2  
0.21  
0.28  
0.33  
0.15  
0.18  
0.39  
0.03  
0.26  
0.37  
0.34  
0.13  
0.29  
0.14

0.37  
0.39  
0.4  
0.03  
0.17  
0.4  
0.04  
0.22  
0.4  
0.16  
0.15  
0.29  
0.04  
0.27  
0.38  
0.34  
0.29  
0.39  
0.4  
0.09  
0.21  
0.32  
0.32  
0.31  
0.22  
0.25  
0.21  
0.4  
0.32  
0.39  
0.38  
0.25  
0.38  
0.15  
0.29  
0.19  
0.33  
0.34  
0.37  
0.34  
0.17  
0.36  
0.25  
0.38  
0.4  
0.32  
0.21  
0.36  
0.29  
0.33  
0.37  
0.37  
0.25

0.23  
0.21  
0.15  
0.33  
0.24  
0.15  
0.33  
0.29  
0.39  
0.3  
0.22  
0.25  
0.3  
0.31  
0.38  
0.01  
0.3  
0.1  
0.28  
0.2  
0.32  
0.3  
0.19  
0.11  
0.08  
0.13  
0.11  
0.3  
0.18  
0.39  
0.4  
0.36  
0.12  
0.23  
0.35  
0.38  
0.33  
0.36  
0.39  
0.38  
0.34  
0.25  
0.17  
0.29  
0.39  
0.38  
0.21  
0.25  
0.35  
0.38  
0.39  
0.34  
0.36



0.25  
0.11  
0.21  
0.4  
0.39  
0.28  
0.3  
0.38  
0.14  
0.23  
0.25  
0.33  
0.38  
0.11  
0.39  
0.38  
0.34  
0.38  
0.14  
0.27  
0.33  
0.38  
0.36  
0.26  
0.23  
0.4  
0.31  
0  
0.15  
0.31  
0.3  
0.4  
0.28  
0.27  
0.22  
0.33  
0.28  
0.35  
0.38  
0.4  
0.37  
0.38  
0.26  
0.28  
0.38  
0.28  
0.23  
0.3  
0.39  
0.17  
0.19  
0.22  
0.19

0.34  
0.33  
0.37  
0.24  
0.36  
0.3  
0.22  
0.38  
0.4  
0.08  
0.12  
0.33  
0.31  
0.27  
0.39  
0.2  
0.35  
0.4  
0.38  
0.13  
0.23  
0.36  
0.33  
0.29  
0.2  
0.38  
0.39  
0.29  
0.26  
0.34  
0.22  
0.25  
0.38  
0.38  
0.33  
0.09  
0.27  
0.22  
0.2  
0.26  
0.26  
0.4  
0.27  
0.25  
0.39  
0.4  
0.27  
0.15  
0.27  
0.33  
0.16  
0.33  
0.39

0.38  
0.39  
0.18  
0.22  
0.15  
0.14  
0.29  
0.24  
0.4  
0.38  
0.39  
0.38  
0  
0.37  
0.34  
0.07  
0.23  
0.39  
0.38  
0.28  
0.4  
0.37  
0.13  
0.32  
0.34  
0.32  
0.35  
0.31  
0.19  
0.24  
0.2  
0.39  
0.35  
0.14  
0.22  
0.29  
0.38  
0.4  
0.37  
0.4  
0.38  
0.4  
0.25  
0.35  
0.4  
0.38  
0.34  
0.29  
0.28  
0.36  
0.39  
0.39  
0.36

0.25  
0.35  
0.31  
0.32  
0.22  
0.28  
0.2  
0.23  
0.34  
0.35  
0.38  
0.4  
0.39  
0.14  
0.25  
0.23  
0.18  
0.35  
0.2  
0.37  
0.36  
0.34  
0.33  
0.31  
0.34  
0.4  
0.28  
0.4  
0.4  
0.15  
0.38  
0.33  
0.09  
0.38  
0.3  
0.38  
0.38  
0.29  
0.36  
0.37  
0.24  
0.39  
0.22  
0.28  
0.04  
0.18  
0.35  
0.29  
0.24  
0.18  
0.2  
0.22  
0.4

0.39  
0.36  
0.3  
0.18  
0.32  
0.38  
0.4  
0.34  
0.2  
0.11  
0.4  
0.27  
0.4  
0.18  
0.37  
0.36  
0.29  
0.39  
0.38  
0.39  
0.31  
0.33  
0.36  
0.27  
0.21  
0.38  
0.29  
0.2  
0.33  
0.35  
0.4  
0.31  
0.24  
0.39  
0.12  
0.16  
0.38  
0.38  
0.13  
0.34  
0.38  
0.37  
0.39  
0.4  
0.39  
0.37  
0.36  
0.38  
0.29  
0.29  
0.15  
0.38  
0.32

0.18  
0.32  
0.37  
0.35  
0.25  
0.23  
0.37  
0.39  
0.35  
0.38  
0.39  
0.3  
0.14  
0.2  
0.37  
0.08  
0.15  
0.22  
0.21  
0.32  
0.03  
0.34  
0.37  
0.4  
0.4  
0.37  
0.2  
0.14  
0.19  
0.19  
0.38  
0.36  
0.38  
0.4  
0.36  
0.26  
0.18  
0.17  
0.09  
0.35  
0.26  
0.33  
0.39  
0.37  
0.28  
0.12  
0.34  
0.33  
0.18  
0.37  
0.29  
0.38  
0.29

0.3  
0.4  
0.39  
0.37  
0.35  
0.4  
0.23  
0.02  
0.4  
0.4  
0.4  
0.39  
0.38  
0  
0.25  
0.34  
0.39  
0.4  
0.39  
0.4  
0.23  
0.38  
0.27  
0.39  
0.29  
0.18  
0.39  
0.4  
0.27  
0.33  
0.37  
0.4  
0.03  
0.26  
0.34  
0.22  
0.27  
0.4  
0.31  
0.36  
0.28  
0.37  
0.14  
0.37  
0.37  
0.14  
0.19  
0.16  
0.4  
0.4  
0.2  
0.12  
0.17

0.38  
0.34  
0.36  
0.17  
0.33  
0.37  
0.4  
0.35  
0.4  
0.37  
0.11  
0.36  
0.36  
0.26  
0.12  
0.39  
0.31  
0.39  
0.39  
0.38  
0.2  
0.05  
0.26  
0.39  
0.29  
0.37  
0.28  
0.39  
0.23  
0.32  
0.35  
0.39  
0.39  
0.4  
0.4  
0.4  
0.25  
0.33  
0.3  
0.4  
0.18  
0.4  
0.39  
0.33  
0.26  
0.36  
0.07  
0.25  
0.38  
0.25  
0.36  
0.13  
0.33



0.3  
0.18  
0.35  
0.13  
0.34  
0.2  
0.3  
0.28  
0.16  
0.34  
0.39  
0.32  
0.1  
0.39  
0.39  
0.29  
0.38  
0.36  
0.09  
0.21  
0.38  
0.37  
0.38  
0.17  
0.39  
0.38  
0.4  
0.4  
0.37  
0.4  
0.4  
0.4  
0.4  
0.39  
0.12  
0.37  
0.39  
0.34  
0.28  
0.35  
0.38  
0.4  
0.13  
0.3  
0.16  
0.3  
0.36  
0.25  
0.33  
0.14  
0.24  
0.21  
0.36

0.17  
0.18  
0.34  
0.16  
0.26  
0.35  
0.4  
0.38  
0.36  
0.4  
0.25  
0.19  
0.35  
0.27  
0.23  
0.4  
0.23  
0.39  
0.39  
0.24  
0.37  
0.21  
0.4  
0.09  
0.14  
0.38  
0.38  
0.33  
0.21  
0.29  
0.39  
0.38  
0.22  
0.33  
0.39  
0.31  
0.27  
0.33  
0.39  
0.38  
0.2  
0.4  
0.38  
0.16  
0.22  
0.4  
0.24  
0.32  
0.3  
0.35  
0.26  
0.14  
0.15

0.28  
0.39  
0.39  
0.12  
0.19  
0.3  
0.24  
0.4  
0.4  
0.4  
0.17  
0.35  
0.32  
0.23  
0.39  
0.37  
0.37  
0.24  
0.33  
0.26  
0.22  
0.09  
0.25  
0.4  
0.39  
0.14  
0.38  
0.34  
0.33  
0.28  
0.24  
0.26  
0.4  
0.22  
0.31  
0.39  
0.37  
0.39  
0.26  
0.36  
0.16  
0.25  
0.24  
0.29  
0.4  
0.34  
0.35  
0.15  
0.4  
0.17  
0.37  
0.38  
0.14

0.38  
0.35  
0.18  
0.27  
0.4  
0.16  
0.22  
0.38  
0.39  
0.38  
0.25  
0.38  
0.33  
0.38  
0.23  
0.29  
0.33  
0.28  
0.4  
0.39  
0.26  
0.18  
0.16  
0.21  
0.4  
0.11  
0.37  
0.29  
0.21  
0.28  
0.31  
0.37  
0.17  
0.4  
0.21  
0.25  
0.26  
0.27  
0.38  
0.36  
0.21  
0.4  
0.22  
0.19  
0.14  
0.15  
0.19  
0.16  
0.4  
0.12  
0.12  
0.15  
0.4

0.38  
0.39  
0.34  
0.4  
0.38  
0.4  
0.09  
0.2  
0.18  
0.31  
0.38  
0.32  
0.08  
0.24  
0.07  
0.21  
0.09  
0.4  
0.17  
0.26  
0.18  
0.08  
0.17  
0.2  
0.21  
0.18  
0.2  
0.11  
0.22  
0.38  
0.15  
0.38  
0.31  
0.29  
0.21  
0.36  
0.2  
0.35  
0.21  
0.37  
0.38  
0.38  
0.4  
0.4  
0.2  
0.28  
0.4  
0.34  
0.38  
0.15  
0.39  
0.39  
0.16

0.4  
0.3  
0.26  
0.09  
0.38  
0.01  
0.37  
0.39  
0.32  
0.23  
0.38  
0.32  
0.39  
0.4  
0.33  
0.33  
0.31  
0.3  
0.32  
0.3  
0.4  
0.39  
0.16  
0.4  
0.32  
0.18  
0.34  
0.23  
0.38  
0.39  
0.4  
0.34  
0.36  
0.39  
0.4  
0.28  
0.37  
0.08  
0.15  
0.39  
0.29  
0.39  
0.4  
0.4  
0.29  
0.33  
0.32  
0.39  
0.37  
0.13  
0.35  
0.27  
0.39

0.33  
0.4  
0.34  
0.39  
0.36  
0.14  
0.38  
0.33  
0.32  
0.38  
0.36  
0.39  
0.35  
0.17  
0.33  
0.11  
0.27  
0.32  
0.39  
0.4  
0.38  
0.4  
0.23  
0.17  
0.33  
0.39  
0.38  
0.39  
0.24  
0.29  
0.35  
0.28  
0.37  
0.4  
0.14  
0.23  
0.37  
0.32  
0.09  
0.33  
0.25  
0.23  
0.36  
0.36  
0.2  
0.29  
0.14  
0.29  
0.34  
0.4  
0.37  
0.31  
0.11

0.38  
0.36  
0.35  
0.4  
0.4  
0.4  
0.38  
0.24  
0.35  
0.4  
0.4  
0.39  
0.23  
0.4  
0.24  
0.39  
0.4  
0.19  
0.28  
0.38  
0.13  
0.17  
0.27  
0.24  
0.38  
0.39  
0.4  
0.33  
0.33  
0.07  
0.36  
0.24  
0.4  
0.36  
0.27  
0.36  
0.4  
0.38  
0.31  
0.3  
0.27  
0.1  
0.28  
0.35  
0.18  
0.04  
0.15  
0.17  
0.13  
0.21  
0.21  
0.24  
0.18



0.32  
0.31  
0.14  
0.34  
0.35  
0.34  
0.31  
0.17  
0.39  
0.11  
0.3  
0.32  
0.25  
0.4  
0.21  
0.26  
0.3  
0.37  
0.38  
0.37  
0.29  
0.38  
0.4  
0.4  
0.37  
0.39  
0.38  
0.4  
0.38  
0.37  
0.38  
0.26  
0.29  
0.37  
0.39  
0.37  
0.28  
0.35  
0.16  
0.32  
0.26  
0.36  
0.35  
0.21  
0.39  
0.39  
0.22  
0.4  
0.21  
0.3  
0.28  
0.31  
0.26

0.35  
0.35  
0.36  
0.35  
0.25  
0.34  
0.2  
0.4  
0.33  
0.31  
0.09  
0.28  
0.33  
0.38  
0.37  
0.39  
0.34  
0.24  
0.27  
0.37  
0.38  
0.4  
0.25  
0.33  
0.24  
0.29  
0.38  
0.39  
0.4  
0.37  
0.38  
0.4  
0.33  
0.4  
0.16  
0.12  
0  
0.28  
0.22  
0.22  
0.19  
0.39  
0.4  
0.38  
0.36  
0.39  
0.17  
0.32  
0.27  
0.33  
0.28  
0.36  
0.4

0.34  
0.3  
0.39  
0.4  
0.25  
0.22  
0.33  
0.16  
0.38  
0.36  
0.38  
0.36  
0.23  
0.28  
0.4  
0.36  
0.2  
0.38  
0.39  
0.4  
0.4  
0.38  
0.36  
0.33  
0.28  
0.38  
0.27  
0.27  
0.39  
0.19  
0.4  
0.13  
0.29  
0.22  
0.24  
0.2  
0.11  
0.16  
0.15  
0.26  
0.22  
0.2  
0.4  
0.4  
0.39  
0.4  
0.21  
0.29  
0.32  
0.14  
0.39  
0.4  
0.37

0.28  
0.35  
0.36  
0.31  
0.12  
0.32  
0.23  
0.02  
0.2  
0.23  
0.4  
0.2  
0.26  
0.39  
0  
0.27  
0.4  
0.4  
0.39  
0.4  
0.27  
0.26  
0.31  
0.35  
0.36  
0.35  
0.12  
0.31  
0.39  
0.16  
0.17  
0.23  
0.15  
0.28  
0.25  
0.35  
0.37  
0.36  
0.33  
0.38  
0.1  
0.4  
0.33  
0.39  
0.33  
0.22  
0.24  
0.37  
0.39  
0.29  
0.38  
0.25  
0.26

0.15  
0.27  
0.24  
0.38  
0.38  
0.21  
0.36  
0.4  
0.3  
0.33  
0.23  
0.19  
0.28  
0.21  
0.28  
0.39  
0.39  
0.31  
0.4  
0.37  
0.39  
0.32  
0.4  
0.39  
0.38  
0.29  
0.28  
0.15  
0.26  
0.35  
0.05  
0.38  
0.15  
0.36  
0.3  
0.19  
0.4  
0.38  
0.39  
0.33  
0.37  
0.37  
0.39  
0.28  
0.4  
0.3  
0.4  
0.38  
0.3  
0.37  
0.11  
0.32  
0.38

0.3  
0.4  
0.16  
0.26  
0.29  
0.28  
0.26  
0.19  
0.17  
0.27  
0.32  
0.31  
0.29  
0.35  
0.2  
0.4  
0.27  
0.37  
0.4  
0.38  
0.36  
0.31  
0.34  
0.29  
0.05  
0.17  
0.39  
0.4  
0.36  
0.18  
0.33  
0.36  
0.4  
0.37  
0.13  
0.38  
0.34  
0.27  
0.38  
0.34  
0.26  
0.4  
0.24  
0.39  
0.27  
0.17  
0.28  
0.3  
0.34  
0.26  
0.13  
0.2  
0.17

0.19  
0.26  
0.26  
0.31  
0.35  
0.36  
0.39  
0.4  
0.37  
0.27  
0  
0.4  
0.34  
0.36  
0.33  
0.39  
0.27  
0.19  
0.33  
0.31  
0.38  
0.33  
0.24  
0.37  
0.28  
0.33  
0.38  
0.35  
0.25  
0.34  
0.35  
0.22  
0.27  
0.34  
0.4  
0.4  
0.17  
0.29  
0.36  
0.39  
0.14  
0.36  
0.4  
0.35  
0.36  
0.31  
0.3  
0.34  
0.36  
0.26  
0.17  
0.17  
0.37

0.13  
0.4  
0.19  
0.27  
0.26  
0.27  
0.31  
0.26  
0.37  
0.37  
0.1  
0.31  
0.31  
0.08  
0.17  
0.38  
0.39  
0.32  
0.39  
0.35  
0.21  
0.26  
0.31  
0.37  
0.4  
0.25  
0.34  
0.39  
0.19  
0.22  
0.35  
0.3  
0.24  
0.39  
0.39  
0.38  
0.39  
0.4  
0.38  
0.34  
0.39  
0.3  
0.29  
0.15  
0.24  
0.23  
0.28  
0.29  
0.31  
0.31  
0.38  
0.2  
0.19



0.19  
0.08  
0.35  
0.35  
0.14  
0.3  
0.08  
0.39  
0.35  
0.11  
0.33  
0.17  
0.38  
0.4  
0.2  
0.13  
0.39  
0.08  
0.2  
0.25  
0.34  
0.39  
0.3  
0.31  
0.24  
0.09  
0.38  
0.2  
0.15  
0.33  
0.34  
0.29  
0.39  
0.29  
0.38  
0.28  
0.17  
0.3  
0.31  
0.38  
0.3  
0.39  
0.32  
0.35  
0.39  
0.37  
0.21  
0.21  
0.39  
0.19  
0.15  
0.21  
0.34

0.39  
0.38  
0.18  
0.28  
0.35  
0.24  
0.25  
0.28  
0.23  
0.2  
0.28  
0.39  
0.16  
0.08  
0.39  
0.1  
0.19  
0.22  
0.39  
0.38  
0.39  
0.4  
0.35  
0.07  
0.4  
0.39  
0.13  
0.06  
0.4  
0.4  
0.38  
0.33  
0.38  
0.32  
0.19  
0.14  
0.32  
0.34  
0.29  
0.18  
0.2  
0.25  
0.4  
0.32  
0.3  
0.4  
0.4  
0.4  
0.39  
0.39  
0.38  
0.09  
0.2

0.24  
0.08  
0.09  
0.08  
0.19  
0.2  
0.17  
0.39  
0.35  
0.18  
0.3  
0.26  
0.29  
0.25  
0.36  
0.31  
0.15  
0.4  
0.35  
0.22  
0.17  
0.34  
0.39  
0.4  
0.39  
0.4  
0.12  
0.34  
0.36  
0.32  
0.33  
0.36  
0.39  
0.29  
0.17  
0.33  
0.35  
0.22  
0.27  
0.34  
0.35  
0.27  
0.18  
0.37  
0.18  
0.15  
0.11  
0.4  
0.38  
0.32  
0.3  
0.02  
0.03

0.19  
0.23  
0.24  
0.16  
0.29  
0.33  
0.36  
0.4  
0.38  
0.21  
0.38  
0.19  
0.2  
0.4  
0.38  
0.35  
0.38  
0.39  
0.38  
0.38  
0.39  
0.35  
0.28  
0.32  
0.39  
0.36  
0.12  
0.17  
0.11  
0.33  
0.2  
0.37  
0.4  
0.4  
0.37  
0.28  
0.29  
0.38  
0.33  
0.18  
0.2  
0.35  
0.2  
0.37  
0.4  
0.34  
0.39  
0.15  
0.36  
0.32  
0.29  
0.35  
0.36

0.39  
0.18  
0.16  
0.24  
0.37  
0.39  
0.33  
0.14  
0.18  
0.16  
0.25  
0.09  
0.32  
0.37  
0.26  
0.37  
0.24  
0.4  
0.4  
0.38  
0.35  
0.35  
0.23  
0.4  
0.39  
0.28  
0.1  
0.26  
0.24  
0.13  
0.28  
0.39  
0.35  
0.38  
0.39  
0.31  
0.28  
0.25  
0.2  
0.19  
0.3  
0.39  
0.4  
0.2  
0.35  
0.27  
0.4  
0.27  
0.24  
0.19  
0.16  
0.4  
0.3

0.18  
0.16  
0.39  
0.19  
0.29  
0.15  
0.28  
0.24  
0.39  
0.37  
0.4  
0.39  
0.1  
0.32  
0.28  
0.09  
0.11  
0.2  
0.31  
0.4  
0.32  
0.32  
0.4  
0.4  
0.38  
0.09  
0.39  
0.29  
0.31  
0.1  
0.4  
0.28  
0.36  
0.33  
0.23  
0.08  
0.08  
0.24  
0.37  
0.38  
0.27  
0.4  
0.38  
0.27  
0.04  
0.33  
0.31  
0.21  
0.39  
0.18  
0.35  
0.38  
0.26

0.29  
0.18  
0.37  
0.4  
0.39  
0.27  
0.23  
0.35  
0.32  
0.39  
0.23  
0.38  
0.36  
0.17  
0.4  
0.38  
0.24  
0.34  
0.08  
0.26  
0.26  
0.11  
0.38  
0.4  
0.14  
0.4  
0.38  
0.31  
0.37  
0.39  
0.38  
0.06  
0.15  
0.17  
0.4  
0.21  
0.25  
0.35  
0.34  
0.37  
0.37  
0.38  
0.2  
0.39  
0.33  
0.4  
0.14  
0.23  
0.31  
0.25  
0.34  
0.4  
0.22

0.33  
0.12  
0.32  
0.14  
0.12  
0.18  
0.12  
0.14  
0.14  
0.12  
0.16  
0.34  
0.4  
0.33  
0.36  
0.33  
0.34  
0.37  
0.38  
0.24  
0.37  
0.38  
0.3  
0.32  
0.24  
0.35  
0.4  
0.15  
0.3  
0.21  
0.34  
0.39  
0.29  
0.25  
0.14  
0.29  
0.4  
0.2  
0.4  
0.33  
0.37  
0.29  
0.38  
0.4  
0.4  
0.14  
0.31  
0.38  
0.33  
0.4  
0.38  
0.39  
0.37



0.38  
0.21  
0.38  
0.4  
0.27  
0.33  
0.4  
0.29  
0.33  
0.37  
0.2  
0.12  
0.35  
0.37  
0.36  
0.35  
0.14  
0.28  
0.37  
0.35  
0.27  
0.37  
0.36  
0.21  
0.32  
0.3  
0.38  
0.25  
0.38  
0.35  
0.36  
0.35  
0.24  
0.18  
0.26  
0.37  
0.38  
0.38  
0.35  
0.29  
0.38  
0.22  
0.1  
0.38  
0.36  
0.4  
0.14  
0.39  
0.09  
0.15  
0.36  
0.24  
0.39

0.31  
0.37  
0.38  
0.39  
0.17  
0.31  
0.32  
0.17  
0.23  
0.3  
0.32  
0.33  
0.4  
0.16  
0.3  
0.33  
0.25  
0.23  
0.34  
0.22  
0.4  
0.08  
0.26  
0.36  
0.36  
0.34  
0.39  
0.3  
0.11  
0.29  
0.37  
0.33  
0.17  
0.18  
0.33  
0.3  
0.35  
0.31  
0.4  
0.21  
0.38  
0.32  
0.34  
0.39  
0.39  
0.37  
0.36  
0.24  
0.35  
0.32  
0.36  
0.36  
0.4

0.38  
0.1  
0.25  
0.22  
0.35  
0.26  
0.24  
0.37  
0.16  
0.13  
0.35  
0.4  
0.21  
0.33  
0.21  
0.28  
0.16  
0.39  
0.32  
0.29  
0.15  
0.35  
0.32  
0.25  
0.13  
0.22  
0.27  
0.18  
0.26  
0.32  
0.26  
0.19  
0.35  
0.3  
0.28  
0.36  
0.21  
0.21  
0.2  
0.21  
0.3  
0.11  
0.2  
0.17  
0.28  
0.13  
0.1  
0.15  
0.08  
0.19  
0.35  
0.25  
0.33

0.34  
0.39  
0.1  
0.39  
0.3  
0.09  
0.25  
0.33  
0.32  
0.36  
0.17  
0.33  
0.07  
0.22  
0.3  
0.38  
0.15  
0.34  
0.09  
0.36  
0.23  
0.12  
0.25  
0.22  
0.36  
0.12  
0.38  
0.27  
0.12  
0.38  
0.39  
0.34  
0.34  
0.19  
0.36  
0.37  
0.29  
0.4  
0.33  
0.4  
0.36  
0.28  
0.4  
0.4  
0.32  
0.39  
0.39  
0.29  
0.16  
0.31  
0.32  
0.18  
0.16

0.14  
0.12  
0.33  
0.16  
0.23  
0.35  
0.38  
0.31  
0.35  
0.19  
0.18  
0.36  
0.37  
0.39  
0.32  
0.3  
0.14  
0.36  
0.37  
0.31  
0.29  
0.2  
0.06  
0.18  
0.29  
0.28  
0.14  
0.34  
0.34  
0.19  
0.4  
0.31  
0.35  
0.15  
0.31  
0.4  
0.39  
0.35  
0.4  
0.36  
0.36  
0.17  
0.34  
0.18  
0.35  
0.29  
0.36  
0.32  
0.22  
0.27  
0.22  
0.25  
0.19

0.29  
0.4  
0.34  
0.37  
0.25  
0.4  
0.31  
0.35  
0.3  
0.29  
0.35  
0.36  
0.33  
0.34  
0.38  
0.4  
0.39  
0.23  
0.13  
0.27  
0.19  
0.35  
0.4  
0.39  
0.3  
0.09  
0.38  
0.36  
0.18  
0.19  
0.32  
0.37  
0.38  
0.39  
0.09  
0.36  
0.32  
0.09  
0.29  
0.24  
0.4  
0.19  
0.29  
0.1  
0.26  
0.4  
0.23  
0.4  
0.18  
0.31  
0.36  
0.22  
0.2

0.19  
0.15  
0.36  
0.3  
0.34  
0.19  
0.14  
0.19  
0.32  
0.31  
0.16  
0.31  
0.34  
0.29  
0.27  
0.25  
0.33  
0.19  
0.18  
0.16  
0.32  
0.15  
0.4  
0.4  
0.04  
0.3  
0.19  
0.33  
0.36  
0.36  
0.37  
0.22  
0.2  
0.33  
0.35  
0.39  
0.36  
0.37  
0.24  
0.12  
0.18  
0.36  
0.38  
0.36  
0.35  
0.31  
0.17  
0.35  
0.33  
0.34  
0.09  
0.18  
0.33

0.22  
0.28  
0.4  
0.17  
0.3  
0.33  
0.33  
0.26  
0.28  
0.39  
0.37  
0.3  
0.11  
0.16  
0.3  
0.27  
0.35  
0.19  
0.16  
0.18  
0.17  
0.25  
0.35  
0.29  
0.11  
0.08  
0.38  
0.31  
0.08  
0.12  
0.39  
0.36  
0.35  
0.26  
0.39  
0.37  
0.39  
0.4  
0.32  
0.2  
0.34  
0.4  
0.36  
0.39  
0.17  
0.02  
0.32  
0.4  
0.09  
0.16  
0.04  
0.22  
0.17



0.29  
0.37  
0.27  
0.4  
0.32  
0.38  
0.29  
0.27  
0.13  
0.11  
0.36  
0.35  
0.2  
0.34  
0.38  
0.37  
0.27  
0.32  
0.39  
0.34  
0.39  
0.13  
0.36  
0.28  
0.37  
0.39  
0.32  
0.39  
0.31  
0.3  
0.06  
0.25  
0.26  
0.4  
0.36  
0.27  
0.4  
0.38  
0.39  
0.38  
0.32  
0.31  
0.18  
0.13  
0.37  
0.32  
0.3  
0.37  
0.26  
0.24  
0.27  
0.24  
0.27

0.11  
0.25  
0.36  
0.39  
0.3  
0.38  
0.35  
0.24  
0.39  
0.28  
0.16  
0.27  
0.32  
0.36  
0.38  
0.25  
0.33  
0.37  
0.3  
0.34  
0.15  
0.31  
0.11  
0.19  
0.18  
0.14  
0.27  
0.37  
0.33  
0.39  
0.37  
0.25  
0.39  
0.09  
0.15  
0.22  
0.38  
0.14  
0.38  
0.36  
0.36  
0.39  
0.21  
0.39  
0.77  
0.29  
0.07  
0.24  
0.35  
0.28  
0.39  
0.29  
0.32

0.27  
0.35  
0.21  
0.14  
0.39  
0.39  
0.35  
0.29  
0.4  
0.25  
0.3  
0.34  
0.13  
0.4  
0.27  
0.25  
0.31  
0.36  
0.36  
0.37  
0.31  
0.38  
0.24  
0.4  
0.4  
0.28  
0.16  
0.36  
0.39  
0.2  
0.31  
0.38  
0.17  
0.2  
0.18  
0.39  
0.38  
0.4  
0.22  
0.32  
0.39  
0.4  
0.18  
0.36  
0.4  
0.38  
0.34  
0.29  
0.26  
0.38  
0.33  
0.26  
0.34

0.35  
0.38  
0.38  
0.28  
0.23  
0.39  
0.37  
0.23  
0.39  
0.3  
0.38  
0.18  
0.14  
0.19  
0.26  
0.28  
0.08  
0.31  
0.38  
0.23  
0.29  
0.31  
0.38  
0.26  
0.4  
0.4  
0.2  
0.37  
0.28  
0.17  
0.36  
0.29  
0.19  
0.13  
0.32  
0.15  
0.24  
0.19  
0.23  
0.39  
0.28  
0.4  
0.36  
0.32  
0.33  
0.37  
0.24  
0.24  
0.05  
0.07  
0.14  
0.11  
0.28

0.37  
0.24  
0.14  
0.1  
0.13  
0.35  
0.39  
0.39  
0.32  
0.38  
0.3  
0.37  
0.39  
0.33  
0.25  
0.37  
0.2  
0.39  
0.35  
0.39  
0.37  
0.27  
0.19  
0.2  
0.38  
0.39  
0.4  
0.4  
0.28  
0.3  
0.2  
0.08  
0.32  
0.33  
0.37  
0.21  
0.34  
0.38  
0.33  
0.37  
0.35  
0.38  
0.08  
0.2  
0.36  
0.35  
0.35  
0.22  
0.09  
0.25  
0.39  
0.28  
0.39

0.4  
0.32  
0.35  
0.11  
0.3  
0.28  
0.37  
0.31  
0.27  
0.21  
0.4  
0.36  
0.35  
0.25  
0.28  
0.19  
0.39  
0.32  
0.25  
0.36  
0.31  
0.39  
0.36  
0.36  
0.4  
0.38  
0.19  
0.18  
0.3  
0.36  
0.24  
0.39  
0.27  
0.13  
0.23  
0.39  
0.4  
0.21  
0.26  
0.35  
0.38  
0.36  
0.39  
0.4  
0.39  
0.2  
0.14  
0.33  
0.38  
0.19  
0.24  
0.09  
0.38

0.17  
0.27  
0.32  
0.4  
0.31  
0.32  
0.27  
0.21  
0.38  
0.27  
0.31  
0.38  
0.16  
0.38  
0.26  
0.22  
0.29  
0.38  
0.38  
0.37  
0.34  
0.27  
0.38  
0.3  
0.36  
0.39  
0.14  
0.19  
0.39  
0.23  
0.31  
0.39  
0.39  
0.22  
0.27  
0.34  
0.38  
0.4  
0.34  
0.26  
0.1  
0.06  
0.17  
0.28  
0.36  
0.4  
0.34  
0.4  
0.32  
0.36  
0.38  
0.37  
0.17

0.13  
0.37  
0.32  
0.39  
0.38  
0.38  
0.4  
0.26  
0.35  
0.2  
0.2  
0.27  
0.22  
0.09  
0.15  
0.36  
0.16  
0.35  
0.38  
0.07  
0.3  
0.4  
0.38  
0.32  
0.35  
0.33  
0.38  
0.22  
0.11  
0.13  
0.24  
0.35  
0.39  
0.39  
0.37  
0.06  
0.32  
0.3  
0.21  
0.38  
0.38  
0.38  
0.28  
0.2  
0.4  
0.32  
0.32  
0.29  
0.37  
0.33  
0.26  
0.39  
0.4



0.3  
0.29  
0.11  
0.19  
0.4  
0.39  
0.37  
0.39  
0.36  
0.36  
0.32  
0.37  
0.37  
0.39  
0.35  
0.18  
0.17  
0.17  
0.34  
0.15  
0.35  
0.38  
0.35  
0.4  
0.25  
0.38  
0.32  
0.35  
0.33  
0.39  
0.33  
0.3  
0.38  
0.32  
0.38  
0.35  
0.38  
0.36  
0.35  
0.37  
0.39  
0.35  
0.37  
0.4  
0.09  
0.13  
0.35  
0.27  
0.39  
0.18  
0.33  
0.18  
0.16

0.19  
0.12  
0.26  
0.4  
0.13  
0.24  
0.18  
0.37  
0.34  
0.28  
0.16  
0.09  
0.34  
0.22  
0.33  
0.36  
0.39  
0.4  
0.26  
0.1  
0.09  
0.32  
0.25  
0.37  
0.18  
0.31  
0.14  
0.4  
0.32  
0.26  
0.15  
0.26  
0.31  
0.16  
0.35  
0.19  
0.08  
0.21  
0.39  
0.39  
0.2  
0.4  
0.19  
0.38  
0.28  
0.35  
0.18  
0.31  
0.36  
0.18  
0.37  
0.4  
0.39

0.18  
0.39  
0.37  
0.32  
0.26  
0.31  
0.36  
0.3  
0.03  
0.14  
0.25  
0.29  
0.35  
0.37  
0.29  
0.35  
0.31  
0.39  
0.1  
0.35  
0.2  
0.18  
0.38  
0.4  
0.18  
0.09  
0.2  
0.17  
0.2  
0.13  
0.1  
0.13  
0.34  
0.3  
0.36  
0.36  
0.19  
0.34  
0.25  
0.39  
0.33  
0.33  
0.37  
0.32  
0.38  
0.39  
0.38  
0.04  
0.06  
0.34  
0.39  
0.39  
0.38

0.38  
0.37  
0.08  
0.16  
0.18  
0.32  
0.2  
0.32  
0.11  
0.16  
0.13  
0.26  
0.39  
0.36  
0.4  
0.36  
0.34  
0.23  
0.31  
0.28  
0.35  
0.18  
0.34  
0.39  
0.36  
0.4  
0.3  
0.37  
0.34  
0.39  
0.32  
0.16  
0.4  
0.16  
0.18  
0.26  
0.2  
0.35  
0.37  
0.38  
0.22  
0.15  
0.31  
0.18  
0.39  
0.31  
0.33  
0.36  
0.32  
0.33  
0.4  
0.38  
0.34

0.33  
0.32  
0.35  
0.38  
0.23  
0.35  
0.39  
0.38  
0.38  
0.39  
0.14  
0.17  
0.17  
0.16  
0.2  
0.15  
0.29  
0.4  
0.4  
0.34  
0.34  
0.38  
0.37  
0.26  
0.22  
0.36  
0.37  
0.39  
0.39  
0.36  
0.39  
0.4  
0.33  
0.4  
0.17  
0.2  
0.34  
0.4  
0.33  
0.28  
0.35  
0.23  
0.35  
0.31  
0.24  
0.1  
0.1  
0.26  
0.35  
0.1  
0.39  
0.21  
0.38

0.25  
0.36  
0.3  
0.39  
0.4  
0.27  
0.4  
0.36  
0.09  
0.13  
0.14  
0.27  
0.13  
0.39  
0.32  
0.3  
0.11  
0.28  
0.15  
0.34  
0.33  
0.15  
0.4  
0.37  
0.35  
0  
0.24  
0.36  
0.33  
0.23  
0.09  
0.13  
0.37  
0.32  
0.28  
0.37  
0.27  
0.08  
0.34  
0.28  
0.33  
0.2  
0.39  
0.16  
0.39  
0.1  
0.26  
0.4  
0.33  
0.07  
0.28  
0.4  
0.35

0.32  
0.18  
0.37  
0.3  
0.13  
0.11  
0.39  
0.31  
0.4  
0.4  
0.15  
0.31  
0.23  
0.32  
0.27  
0.32  
0.28  
0.17  
0.11  
0.17  
0.23  
0.16  
0.19  
0.39  
0.22  
0.22  
0.37  
0.25  
0.14  
0.17  
0.29  
0.28  
0.4  
0.18  
0.12  
0.16  
0.38  
0.37  
0.14  
0.4  
0.35  
0.15  
0.34  
0.23  
0.22  
0.21  
0.24  
0.4  
0.25  
0.32  
0.37  
0.36  
0.35

0.4  
0.14  
0.4  
0.38  
0.35  
0.31  
0.29  
0.37  
0.22  
0.35  
0.2  
0.35  
0.4  
0.38  
0.26  
0.39  
0.31  
0.12  
0.34  
0.38  
0.38  
0.22  
0.37  
0.36  
0.4  
0.38  
0.16  
0.4  
0.38  
0.29  
0.34  
0.32  
0.35  
0.38  
0.34  
0.26  
0.37  
0.38  
0.35  
0.39  
0.38  
0.35  
0.39  
0.4  
0.36  
0.38  
0.3  
0.25  
0.38  
0.35  
0.19  
0.11  
0.39



0.39  
0.38  
0.4  
0.37  
0.33  
0.36  
0.36  
0.33  
0.4  
0.25  
0.34  
0.36  
0.39  
0  
0.33  
0.4  
0.39  
0.25  
0.35  
0.4  
0.28  
0.39  
0.37  
0.28  
0.39  
0.4  
0.11  
0.27  
0.27  
0.28  
0.32  
0.24  
0.4  
0.4  
0.3  
0.07  
0.23  
0.26  
0.36  
0.4  
0.33  
0.35  
0.19  
0.38  
0.31  
0.4  
0.34  
0.23  
0.04  
0.28  
0.32  
0.27  
0.33

0.36  
0.31  
0.4  
0.39  
0.38  
0.36  
0.39  
0.25  
0.21  
0.2  
0.38  
0.36  
0.38  
0.4  
0.35  
0.38  
0.39  
0.36  
0.33  
0.38  
0.27  
0.32  
0.31  
0.33  
0.39  
0.12  
0.35  
0.36  
0.38  
0.39  
0.34  
0.39  
0.21  
0.24  
0.1  
0.08  
0.23  
0.26  
0.34  
0.35  
0.37  
0.26  
0.33  
0.25  
0.39  
0.22  
0.36  
0.17  
0.38  
0.37  
0.37  
0.34  
0.38

0.08  
0.33  
0.25  
0.29  
0.25  
0.36  
0.34  
0.18  
0.16  
0.38  
0.37  
0.4  
0.29  
0.3  
0.36  
0.35  
0.2  
0.4  
0.19  
0.28  
0.32  
0.36  
0.17  
0.4  
0.22  
0.23  
0.4  
0.39  
0.13  
0.4  
0.39  
0.25  
0.4  
0.39  
0.36  
0.23  
0.27  
0.14  
0.32  
0.27  
0.39  
0.21  
0.33  
0.29  
0.35  
0.34  
0.37  
0.11  
0.21  
0.38  
0.39  
0.37  
0.4

0.39  
0.31  
0.32  
0.38  
0.37  
0.36  
0.33  
0.26  
0.37  
0.4  
0.36  
0.24  
0.22  
0.2  
0.3  
0.22  
0.34  
0.4  
0.39  
0.38  
0.2  
0.38  
0.32  
0.09  
0.36  
0.32  
0.24  
0.26  
0.26  
0.1  
0.21  
0.23  
0.32  
0.4  
0.4  
0.24  
0.08  
0.23  
0.19  
0.15  
0.39  
0.4  
0.3  
0.34  
0.32  
0.31  
0.37  
0.28  
0.35  
0.34  
0.4  
0.38  
0.39

0.19  
0.37  
0.2  
0.25  
0.36  
0.33  
0.39  
0.35  
0.16  
0.28  
0.37  
0.26  
0.36  
0.32  
0.16  
0.28  
0.37  
0.15  
0.34  
0.35  
0.27  
0.34  
0.37  
0.31  
0.34  
0.27  
0.22  
0.35  
0.25  
0.13  
0.19  
0.2  
0.31  
0.37  
0.36  
0.14  
0.34  
0.33  
0.32  
0.37  
0.39  
0.17  
0.12  
0.39  
0.4  
0.36  
0.29  
0.38  
0.23  
0.24  
0.32  
0.29  
0.14

0.34  
0.39  
0.3  
0.35  
0.27  
0.32  
0.19  
0.37  
0.18  
0.29  
0.27  
0.37  
0.4  
0.32  
0.24  
0.1  
0.24  
0.26  
0.29  
0.16  
0.3  
0.32  
0.37  
0.36  
0.35  
0.34  
0.38  
0.4  
0.39  
0.4  
0.37  
0.38  
0.3  
0.38  
0.37  
0.19  
0.37  
0.12  
0.13  
0.35  
0.36  
0.38  
0.14  
0.3  
0.31  
0.39  
0.38  
0.27  
0.39  
0.39  
0.33  
0.14  
0.26

0.37  
0.15  
0.16  
0.27  
0.27  
0.03  
0.36  
0.26  
0.32  
0.4  
0.25  
0.19  
0.08  
0.34  
0.36  
0.1  
0.31  
0.4  
0.37  
0.38  
0.38  
0.16  
0.24  
0.32  
0.33  
0.13  
0.35  
0.31  
0.34  
0.21  
0.14  
0.36  
0.36  
0.16  
0.3  
0.22  
0.27  
0.07  
0.36  
0.37  
0.36  
0.09  
0.26  
0.26  
0.39  
0.38  
0.31  
0.32  
0.39  
0.05  
0.21  
0.32  
0.4

0.08  
0.4  
0.39  
0.08  
0.4  
0.4  
0.36  
0.34  
0.21  
0.23  
0.2  
0.39  
0.22  
0.15  
0.39  
0.22  
0.36  
0.4  
0.19  
0.2  
0.39  
0.35  
0.31  
0.4  
0.38  
0.39  
0.17  
0.25  
0.37  
0.31  
0.34  
0.17  
0.38  
0.26  
0.33  
0.38  
0.23  
0.33  
0.39  
0.33  
0.39  
0.31  
0.36  
0.4  
0.32  
0.29  
0.27  
0.19  
0.18  
0.27  
0.26  
0.38  
0.35



0.2  
0.21  
0.24  
0.3  
0.37  
0.21  
0.39  
0.16  
0.35  
0.4  
0.25  
0.35  
0.4  
0.36  
0.24  
0.39  
0.27  
0.4  
0.24  
0.27  
0.17  
0.38  
0.3  
0.33  
0.35  
0.17  
0.19  
0.15  
0.31  
0.33  
0.4  
0.36  
0.36  
0.4  
0.29  
0.3  
0.35  
0.35  
0.17  
0.26  
0.21  
0.16  
0.38  
0.25  
0.23  
0.25  
0.38  
0.2  
0.35  
0.39  
0.37  
0.36  
0.17

0.34  
0.35  
0.24  
0.31  
0.21  
0.03  
0.38  
0.33  
0.39  
0.4  
0.4  
0.33  
0.33  
0.4  
0.4  
0.27  
0.34  
0.39  
0.39  
0.37  
0.38  
0.39  
0.38  
0.4  
0.34  
0.39  
0.27  
0.37  
0.29  
0.31  
0.25  
0.4  
0.17  
0.38  
0.39  
0.32  
0.39  
0.28  
0.32  
0.27  
0.26  
0.38  
0.39  
0.27  
0.35  
0.1  
0.27  
0.4  
0.38  
0.32  
0.31  
0.19  
0.14

0.4  
0.37  
0.36  
0.36  
0.35  
0.29  
0.38  
0.4  
0.36  
0.22  
0.34  
0.37  
0.39  
0.4  
0.29  
0.39  
0.4  
0.38  
0.39  
0.19  
0.31  
0.38  
0.35  
0.2  
0.38  
0.4  
0.38  
0.26  
0.27  
0.33  
0.21  
0.29  
0.21  
0.24  
0.39  
0.39  
0.28  
0.3  
0.33  
0.38  
0.32  
0.32  
0.27  
0.24  
0.36  
0.28  
0.39  
0.18  
0.28  
0.3  
0.22  
0.23  
0.21

0.12  
0.4  
0.39  
0.25  
0.15  
0.17  
0.07  
0.3  
0.34  
0.34  
0.24  
0.3  
0.37  
0.35  
0.31  
0.29  
0.4  
0.35  
0.22  
0.36  
0.35  
0.14  
0.1  
0.39  
0.21  
0.25  
0.34  
0.28  
0.39  
0.31  
0.31  
0.21  
0.38  
0.39  
0.26  
0.34  
0.3  
0.4  
0.35  
0.22  
0.38  
0.4  
0.27  
0.3  
0.33  
0.35  
0.31  
0.24  
0.34  
0.33  
0.4  
0.4  
0.27

0.2  
0.14  
0.39  
0.37  
0.4  
0.39  
0.37  
0.08  
0.4  
0.4  
0.37  
0.05  
0.4  
0.37  
0.4  
0.39  
0.2  
0.27  
0.36  
0.34  
0.39  
0.38  
0.4  
0.4  
0.36  
0.32  
0.38  
0.38  
0.4  
0.29  
0.39  
0.3  
0.27  
0.32  
0.34  
0.3  
0.4  
0.31  
0.09  
0.33  
0.23  
0.3  
0.36  
0.38  
0.32  
0.34  
0.36  
0.38  
0.35  
0.4  
0.39  
0.27  
0.38

0.39  
0.38  
0.38  
0.21  
0.25  
0.26  
0.3  
0.23  
0.21  
0.38  
0.11  
0.11  
0.16  
0.38  
0.38  
0.4  
0.4  
0.38  
0.31  
0.4  
0.4  
0.36  
0.25  
0.12  
0.14  
0.16  
0.24  
0.31  
0.32  
0.34  
0.35  
0.18  
0.14  
0.16  
0.16  
0.15  
0.35  
0.35  
0.32  
0.16  
0.17  
0.38  
0.38  
0.4  
0.39  
0.39  
0.39  
0.38  
0.32  
0.36  
0.37  
0.31  
0.16

0.34  
0.28  
0.14  
0.21  
0.34  
0.32  
0.37  
0.4  
0.39  
0.06  
0.4  
0.4  
0.34  
0.37  
0.24  
0.29  
0.29  
0.36  
0.35  
0.4  
0.16  
0.16  
0.35  
0.37  
0.35  
0.34  
0.32  
0.37  
0.37  
0.4  
0.32  
0.4  
0.31  
0.33  
0.33  
0.14  
0.31  
0.38  
0.16  
0.16  
0.4  
0.14  
0.12  
0.39  
0.35  
0.38  
0.29  
0.34  
0.34  
0.06  
0.34  
0.37  
0.3

0.4  
0.4  
0.31  
0.37  
0.4  
0.31  
0.25  
0.36  
0.36  
0.39  
0.35  
0.33  
0.26  
0.33  
0.26  
0.11  
0.12  
0.19  
0.36  
0.36  
0.36  
0.34  
0.39  
0.4  
0.4  
0.3  
0.38  
0.34  
0.28  
0.31  
0.3  
0.34  
0.39  
0.27  
0.18  
0.33  
0.35  
0.4  
0.14  
0.23  
0.24  
0.35  
0.38  
0.25  
0.39  
0.17  
0.34  
0.3  
0.38  
0.2  
0.24  
0.37  
0.4



0.37  
0.33  
0.38  
0.18  
0.14  
0.15  
0.28  
0.28  
0.28  
0.19  
0.16  
0.31  
0.13  
0.22  
0.4  
0.31  
0.33  
0.37  
0.12  
0.33  
0.39  
0.38  
0.29  
0.32  
0.4  
0.3  
0.35  
0.23  
0.4  
0.25  
0.29  
0.39  
0.36  
0.29  
0.35  
0.21  
0.27  
0.4  
0.28  
0.39  
0.4  
0.4  
0.39  
0.39  
0.39  
0.16  
0.39  
0.31  
0.35  
0.23  
0.14  
0.1  
0.19

0.39  
0.4  
0.37  
0.4  
0.39  
0.4  
0.39  
0.4  
0.39  
0.37  
0.4  
0.38  
0.27  
0.08  
0.28  
0.05  
0.32  
0.36  
0.2  
0.1  
0.34  
0.38  
0.36  
0.39  
0.28  
0.18  
0.28  
0.12  
0.4  
0.19  
0.15  
0.25  
0.36  
0.4  
0.17  
0.22  
0.32  
0.29  
0.26  
0.31  
0.37  
0.35  
0.34  
0.26  
0.37  
0.3  
0.16  
0.27  
0.17  
0.23  
0.11  
0.4  
0.09

0.29  
0.4  
0.39  
0.32  
0.33  
0.39  
0.33  
0.26  
0.4  
0.34  
0.38  
0.38  
0.39  
0.24  
0.39  
0.31  
0.21  
0.4  
0.38  
0.4  
0.37  
0.4  
0.4  
0.39  
0.4  
0.37  
0.31  
0.35  
0.35  
0.4  
0.4  
0.19  
0.25  
0.34  
0.35  
0.37  
0.08  
0.12  
0.27  
0.37  
0.16  
0.16  
0.4  
0.4  
0.32  
0.39  
0.35  
0.38  
0.27  
0.27  
0.32  
0.26  
0.28

0.31  
0.13  
0.39  
0.32  
0.4  
0.38  
0.38  
0.29  
0.38  
0.36  
0.34  
0.39  
0.3  
0.38  
0.37  
0.35  
0.35  
0.27  
0.26  
0.24  
0.4  
0.3  
0.38  
0.3  
0.15  
0.19  
0.23  
0.22  
0.32  
0.39  
0.39  
0.36  
0.3  
0.2  
0.34  
0.19  
0.38  
0.31  
0.35  
0.39  
0.39  
0.36  
0.17  
0.38  
0.4  
0.2  
0.13  
0.22  
0.21  
0.36  
0.4  
0.22  
0.23

0.35  
0.22  
0.34  
0.33  
0.26  
0.3  
0.34  
0.03  
0.39  
0.11  
0.29  
0.31  
0.37  
0.22  
0.4  
0.18  
0.32  
0.16  
0.06  
0.23  
0.15  
0.38  
0.3  
0.38  
0.18  
0.38  
0.36  
0.23  
0.15  
0.39  
0.25  
0.4  
0.39  
0.39  
0.36  
0.38  
0.19  
0.23  
0.09  
0.17  
0.12  
0.12  
0.38  
0.4  
0.39  
0.39  
0.31  
0.36  
0.25  
0.11  
0.39  
0.21  
0.4

0.19  
0.3  
0.31  
0.19  
0.18  
0.03  
0.29  
0.4  
0.37  
0.26  
0.36  
0.39  
0.3  
0.38  
0.26  
0.38  
0.34  
0.35  
0.39  
0.36  
0.27  
0.28  
0.24  
0.32  
0.16  
0.4  
0.3  
0.24  
0.36  
0.29  
0.37  
0.34  
0.39  
0.37  
0.34  
0.28  
0.12  
0.33  
0.39  
0.38  
0.38  
0.24  
0.12  
0.25  
0.33  
0.31  
0.31  
0.27  
0.37  
0.33  
0.39  
0.22  
0.4

0.39  
0.3  
0.07  
0.3  
0.16  
0.18  
0.38  
0.32  
0.36  
0.3  
0.38  
0.38  
0.4  
0.12  
0.16  
0.33  
0.17  
0.39  
0.34  
0.29  
0.33  
0.36  
0.23  
0.23  
0.28  
0.36  
0.37  
0.38  
0.23  
0.22  
0.36  
0.39  
0.35  
0.28  
0.37  
0.39  
0.37  
0.38  
0.4  
0.4  
0.27  
0.14  
0.32  
0.21  
0.36  
0.21  
0.36  
0.31  
0.35  
0.35  
0.38  
0.21  
0.31

0.36  
0.26  
0.33  
0.39  
0.35  
0.38  
0.26  
0.4  
0.2  
0.36  
0.38  
0.21  
0.12  
0.27  
0.21  
0.17  
0.27  
0.34  
0.31  
0.32  
0.36  
0.39  
0.29  
0.06  
0.25  
0.27  
0.33  
0.13  
0.2  
0.3  
0.39  
0.35  
0.35  
0.25  
0.4  
0.32  
0.4  
0.38  
0.38  
0.36  
0.25  
0.27  
0.4  
0.36  
0.32  
0.19  
0.38  
0.32  
0.32  
0.25  
0.32  
0.4  
0.39



0.36  
0.39  
0.37  
0.3  
0.37  
0.2  
0.4  
0.29  
0.4  
0.24  
0.27  
0.4  
0.32  
0.33  
0.39  
0.31  
0.4  
0.34  
0.31  
0.35  
0.4  
0.37  
0.09  
0.05  
0.23  
0.35  
0.32  
0.4  
0.37  
0.38  
0.34  
0.4  
0.23  
0.23  
0.09  
0.33  
0.27  
0.39  
0.15  
0.08  
0.23  
0.18  
0.31  
0.4  
0.35  
0.38  
0.06  
0.39  
0.2  
0.4  
0.37  
0.34  
0.23

0.18  
0.26  
0.35  
0.37  
0.33  
0.38  
0.35  
0.39  
0.32  
0.39  
0.38  
0.21  
0.06  
0.16  
0.18  
0.37  
0.34  
0.17  
0.3  
0.4  
0.25  
0.37  
0.36  
0.36  
0.22  
0.2  
0.4  
0.39  
0.29  
0.23  
0.28  
0.38  
0.39  
0.23  
0.17  
0.1  
0.28  
0.3  
0.19  
0.39  
0.2  
0.19  
0.34  
0.4  
0.35  
0.23  
0.1  
0  
0.3  
0.39  
0.39  
0.37  
0.32

0.32  
0.04  
0.15  
0.4  
0.29  
0.39  
0.16  
0.2  
0.34  
0.14  
0.22  
0.36  
0.3  
0.39  
0.12  
0.4  
0.2  
0.07  
0.14  
0.29  
0.2  
0.38  
0.4  
0.04  
0.04  
0.13  
0.4  
0.36  
0.31  
0.32  
0.35  
0.4  
0.24  
0.33  
0.33  
0.08  
0.25  
0.33  
0.38  
0.4  
0.36  
0.36  
0.33  
0.36  
0.34  
0.38  
0.36  
0.39  
0.38  
0.4  
0.13  
0.37  
0.28

0.36  
0.3  
0.38  
0.15  
0.32  
0.39  
0.11  
0.16  
0.12  
0.34  
0.35  
0.32  
0.31  
0.31  
0.37  
0.12  
0.31  
0.31  
0.34  
0.27  
0.34  
0.28  
0.27  
0.31  
0.31  
0.14  
0.32  
0.34  
0.4  
0.3  
0.27  
0.3  
0.21  
0.4  
0.4  
0.35  
0.29  
0.39  
0.4  
0.4  
0.36  
0.31  
0.37  
0.37  
0.31  
0.39  
0.3  
0.36  
0.36  
0.39  
0.39  
0.31  
0.34

0.39  
0.26  
0.36  
0.21  
0.18  
0.27  
0.34  
0.37  
0.33  
0.14  
0.37  
0.26  
0.39  
0.37  
0.15  
0.32  
0.35  
0.34  
0.35  
0.28  
0.4  
0.39  
0.33  
0.25  
0.34  
0.21  
0.32  
0.15  
0.28  
0.35  
0.36  
0.38  
0.3  
0.13  
0.31  
0.34  
0.27  
0.21  
0.35  
0.28  
0.24  
0.39  
0.4  
0.38  
0.34  
0.37  
0.35  
0.39  
0.29  
0.18  
0.38  
0.34  
0.15

0.25  
0.24  
0.15  
0.25  
0.39  
0.34  
0.26  
0.19  
0.35  
0.35  
0.4  
0.39  
0.34  
0.4  
0.3  
0.4  
0.39  
0.37  
0.4  
0.3  
0.26  
0.4  
0.21  
0.39  
0.39  
0.38  
0.25  
0.32  
0.32  
0.34  
0.2  
0.03  
0.09  
0.29  
0.37  
0.24  
0.17  
0.27  
0.29  
0.38  
0.3  
0.4  
0.4  
0.4  
0.28  
0.21  
0.4  
0.2  
0.23  
0.37  
0.36  
0.06  
0.35

0.14  
0.34  
0.37  
0.31  
0.4  
0.31  
0.33  
0.39  
0.39  
0.4  
0.35  
0.19  
0.39  
0.4  
0.39  
0.4  
0.38  
0.39  
0.36  
0.38  
0.37  
0  
0.35  
0.34  
0.25  
0.4  
0.18  
0.34  
0.36  
0.22  
0.29  
0.23  
0.25  
0.3  
0.38  
0.14  
0.15  
0.4  
0.39  
0.23  
0.09  
0.33  
0.4  
0.37  
0.4  
0.38  
0.4  
0.31  
0.23  
0.36  
0.36  
0.34  
0.32

0.33  
0.36  
0.39  
0.26  
0.2  
0.08  
0.33  
0.4  
0.39  
0.4  
0.22  
0.27  
0.04  
0.08  
0.18  
0.22  
0.38  
0.4  
0.38  
0.4  
0.38  
0.31  
0.39  
0.3  
0.16  
0.35  
0.31  
0.06  
0.21  
0.36  
0.39  
0.29  
0.4  
0.31  
0.35  
0.4  
0.39  
0.37  
0.4  
0.35  
0.4  
0.38  
0.29  
0.37  
0.29  
0.17  
0.12  
0.04  
0.31  
0.17  
0.19  
0.4  
0.12



0.18  
0.33  
0.21  
0.38  
0.39  
0.1  
0.23  
0.28  
0.15  
0.18  
0.37  
0.38  
0.35  
0.39  
0.27  
0.37  
0.33  
0.36  
0.33  
0.18  
0.4  
0.38  
0.36  
0.4  
0.22  
0.28  
0.39  
0.39  
0.38  
0.4  
0.03  
0.27  
0.27  
0.4  
0.33  
0.13  
0.2  
0.35  
0.09  
0.24  
0.34  
0.26  
0.31  
0.33  
0.4  
0.4  
0.37  
0.32  
0.27  
0.1  
0.39  
0.24  
0.15

0.3  
0.14  
0.22  
0.3  
0.27  
0.21  
0.34  
0.4  
0.26  
0.18  
0.33  
0.16  
0.22  
0.34  
0.25  
0.28  
0.27  
0.32  
0.23  
0.25  
0.27  
0.35  
0.4  
0.36  
0.4  
0.39  
0.4  
0.34  
0.28  
0.39  
0.26  
0.35  
0.25  
0.19  
0.15  
0.16  
0.13  
0.35  
0.29  
0.17  
0.18  
0.3  
0.19  
0.27  
0.32  
0.24  
0.34  
0.38  
0.24  
0.39  
0.27  
0.38  
0.35

0.2  
0.12  
0.23  
0.26  
0.32  
0.2  
0.39  
0.36  
0.27  
0.39  
0.3  
0.36  
0.27  
0.13  
0.18  
0.31  
0.36  
0.4  
0.17  
0.27  
0.2  
0.24  
0.28  
0.28  
0.25  
0.38  
0.19  
0.18  
0.26  
0.33  
0.31  
0.26  
0.38  
0.11  
0.17  
0.19  
0.36  
0.37  
0.2  
0.33  
0.17  
0.34  
0.12  
0.29  
0.4  
0.34  
0.38  
0.4  
0.38  
0.39  
0.24  
0.33  
0.31

0.16  
0.31  
0.02  
0.23  
0.4  
0.4  
0.34  
0.11  
0.24  
0.15  
0.36  
0.21  
0.25  
0.38  
0.36  
0.4  
0.18  
0.4  
0.26  
0.4  
0.1  
0.08  
0.15  
0.1  
0.17  
0.14  
0.14  
0.12  
0.36  
0.39  
0.4  
0.29  
0.22  
0.12  
0.3  
0.17  
0.4  
0.24  
0.23  
0.08  
0.36  
0.09  
0.16  
0.4  
0.38  
0.39  
0.39  
0.36  
0.4  
0.28  
0.15  
0.23  
0.13

0.15  
0.3  
0.19  
0.34  
0.37  
0.36  
0.4  
0.34  
0.33  
0.3  
0.23  
0.36  
0.4  
0.38  
0.37  
0.2  
0.31  
0.38  
0.3  
0.39  
0.2  
0.32  
0.36  
0.28  
0.4  
0.4  
0.4  
0.3  
0.31  
0.1  
0.4  
0.3  
0.39  
0.37  
0.37  
0.39  
0.39  
0.27  
0.37  
0.4  
0.29  
0.25  
0.31  
0.27  
0.16  
0.34  
0.21  
0.38  
0.34  
0.37  
0.4  
0.21  
0.33

0.35  
0.33  
0.32  
0.22  
0.4  
0.34  
0.24  
0.37  
0.4  
0.4  
0.39  
0.38  
0.34  
0.35  
0.37  
0.33  
0.32  
0.25  
0.17  
0.39  
0.21  
0.29  
0.36  
0.4  
0.36  
0.16  
0.39  
0.36  
0.4  
0.21  
0.11  
0.17  
0.3  
0.4  
0.36  
0.18  
0.32  
0.23  
0.31  
0.21  
0.39  
0.39  
0.37  
0.19  
0.35  
0.37  
0.3  
0.35  
0.4  
0.35  
0.38  
0.27  
0.31

0.4  
0.3  
0.16  
0.38  
0.4  
0.25  
0.28  
0.34  
0.29  
0.13  
0.39  
0.3  
0.39  
0.26  
0.38  
0.33  
0.36  
0.36  
0.39  
0.26  
0.15  
0.05  
0.14  
0.19  
0.11  
0.18  
0.07  
0.13  
0.26  
0.35  
0.38  
0.1  
0.34  
0.37  
0.37  
0.38  
0.24  
0.31  
0.11  
0.33  
0.24  
0.39  
0.28  
0.29  
0.22  
0.39  
0.3  
0.3  
0.4  
0.38  
0.34  
0.3  
0.36

0.38  
0.35  
0.2  
0.39  
0.32  
0.28  
0.22  
0.23  
0.24  
0.1  
0.17  
0.37  
0.37  
0.17  
0.39  
0.24  
0.28  
0.18  
0.39  
0.28  
0.38  
0.28  
0.13  
0.28  
0.15  
0.4  
0.23  
0.39  
0.2  
0.4  
0.39  
0.37  
0.37  
0.28  
0.35  
0.17  
0.29  
0.36  
0.26  
0.35  
0.38  
0.29  
0.38  
0.39  
0.36  
0.39  
0.4  
0.22  
0.22  
0.25  
0.31  
0.24  
0.36



0.36  
0.28  
0.28  
0.4  
0.39  
0.11  
0.4  
0.29  
0.36  
0.35  
0.35  
0.29  
0.38  
0.38  
0.19  
0.17  
0.4  
0.22  
0.33  
0.35  
0.31  
0.22  
0.39  
0.15  
0.3  
0.3  
0.39  
0.33  
0.13  
0.36  
0.3  
0.3  
0.32  
0.29  
0.39  
0.34  
0.34  
0.19  
0.35  
0.35  
0.4  
0.35  
0.4  
0.13  
0.15  
0.31  
0.22  
0.35  
0.4  
0.33  
0.4  
0.38  
0.37

0.35  
0.34  
0.28  
0.29  
0.11  
0.23  
0.19  
0.21  
0.11  
0.11  
0.3  
0.3  
0.29  
0.3  
0.17  
0.26  
0.16  
0.31  
0.04  
0.28  
0.23  
0.39  
0.4  
0.33  
0.16  
0.3  
0.38  
0.16  
0.36  
0.32  
0.23  
0.36  
0.17  
0.33  
0.4  
0.39  
0.37  
0.37  
0.4  
0.31  
0.4  
0.33  
0.37  
0.28  
0.36  
0.39  
0.4  
0.4  
0.4  
0.39  
0.4  
0.32  
0.3

0.4  
0.21  
0.22  
0.32  
0.27  
0.33  
0.16  
0.19  
0.31  
0.32  
0.28  
0.3  
0.21  
0.18  
0.16  
0.31  
0.15  
0.27  
0.26  
0.37  
0.24  
0.17  
0.02  
0.11  
0.36  
0.11  
0.15  
0.23  
0.29  
0.38  
0.25  
0.39  
0.4  
0.24  
0.22  
0.24  
0.22  
0.19  
0.23  
0.23  
0.27  
0.39  
0.17  
0.37  
0.26  
0.22  
0.26  
0.29  
0.14  
0.35  
0.12  
0.14  
0.39

0.35  
0.22  
0.07  
0.1  
0.39  
0.21  
0.13  
0.38  
0.16  
0.2  
0.37  
0.21  
0.23  
0.33  
0.23  
0.37  
0.35  
0.4  
0.36  
0.39  
0.08  
0.38  
0.4  
0.38  
0.17  
0.35  
0.4  
0.31  
0.22  
0.14  
0.22  
0.3  
0.37  
0.3  
0.18  
0.24  
0.29  
0.25  
0.22  
0.22  
0.23  
0.28  
0.37  
0.21  
0.2  
0.2  
0.37  
0.29  
0.14  
0.33  
0.36  
0.36  
0.31

0.39  
0.37  
0.3  
0.34  
0.36  
0.17  
0.36  
0.36  
0.33  
0.22  
0.4  
0.37  
0.15  
0.16  
0.33  
0.24  
0.21  
0.38  
0.26  
0.34  
0.19  
0.35  
0.4  
0.37  
0.39  
0.37  
0.29  
0.4  
0.13  
0.39  
0.19  
0.03  
0.09  
0.37  
0.4  
0.38  
0.24  
0.02  
0.21  
0.3  
0.31  
0.29  
0.4  
0.4  
0.03  
0.1  
0.38  
0.11  
0.1  
0.15  
0.11  
0.19  
0.19

0.4  
0.34  
0.36  
0.37  
0.31  
0.27  
0.37  
0.39  
0.35  
0.24  
0.38  
0.26  
0.19  
0.26  
0.21  
0.24  
0.23  
0.13  
0.26  
0.34  
0.26  
0.34  
0.16  
0.37  
0.18  
0.4  
0.25  
0.34  
0.36  
0.4  
0.38  
0.39  
0.4  
0.39  
0.38  
0.4  
0.3  
0.4  
0.75  
0.4  
0.4  
0.4  
0.4  
0.29  
0.37  
0.38  
0.4  
0.36  
0.4  
0.37  
0.33  
0.35  
0.29  
0.26

0.39  
0.36  
0.22  
0.34  
0.31  
0.39  
0.37  
0.21  
0.38  
0.39  
0.35  
0.37  
0.37  
0.35  
0.35  
0.29  
0.31  
0.12  
0.18  
0.3  
0.18  
0.15  
0.34  
0.4  
0.25  
0.31  
0.35  
0.2  
0.4  
0.28  
0.33  
0.4  
0.36  
0.35  
0.4  
0.35  
0.37  
0.27  
0.4  
0.39  
0.29  
0.4  
0.39  
0.22  
0.35  
0.4  
0.4  
0.19  
0.14  
0.38  
0.36  
0.36  
0.35

0.36  
0.31  
0.25  
0.32  
0.32  
0.36  
0.14  
0.4  
0.32  
0.39  
0.21  
0.32  
0.35  
0.35  
0.34  
0.37  
0.23  
0.24  
0.38  
0.19  
0.38  
0.31  
0.38  
0.18  
0.31  
0.31  
0.38  
0.31  
0.37  
0.31  
0.38  
0.36  
0.31  
0.38  
0.38  
0.39  
0.4  
0.08  
0.39  
0.39  
0.39  
0.36  
0.31  
0.4  
0.36  
0.39  
0.19  
0.23  
0.35  
0.17  
0.39  
0.4  
0.38



0.23  
0.25  
0.37  
0.4  
0.3  
0.25  
0.2  
0.31  
0.39  
0.27  
0.22  
0.29  
0.35  
0.25  
0.19  
0.35  
0.29  
0.17  
0.32  
0.37  
0.35  
0.3  
0.22  
0.31  
0.23  
0.39  
0.38  
0.37  
0.23  
0.33  
0.28  
0.19  
0.13  
0.38  
0.21  
0.32  
0.32  
0.14  
0.39  
0.3  
0.38  
0.22  
0.28  
0.4  
0.4  
0.28  
0.4  
0.33  
0.39  
0.33  
0.36  
0.18  
0.11

0.2  
0.1  
0.17  
0.39  
0.32  
0.35  
0.29  
0.38  
0.39  
0.38  
0.36  
0.38  
0.37  
0.38  
0.36  
0.36  
0.3  
0.33  
0.34  
0.33  
0.37  
0.37  
0.29  
0.4  
0.34  
0.4  
0.14  
0.23  
0.25  
0.19  
0.09  
0.1  
0.4  
0.4  
0.37  
0.29  
0.21  
0.29  
0.4  
0.4  
0.21  
0.26  
0.09  
0.35  
0.31  
0.36  
0.19  
0.25  
0.28  
0.14  
0.37  
0.35  
0.12

0.28  
0.38  
0.3  
0.36  
0.27  
0.39  
0.24  
0.24  
0.15  
0.14  
0.36  
0.39  
0.37  
0.4  
0.3  
0.28  
0.28  
0.4  
0.34  
0.19  
0.19  
0.36  
0.12  
0.37  
0.29  
0.39  
0.3  
0.17  
0.26  
0.17  
0.33  
0.38  
0.38  
0.1  
0.08  
0.36  
0.32  
0.29  
0.39  
0.38  
0.4  
0.31  
0.25  
0.35  
0.39  
0.4  
0.31  
0.37  
0.2  
0.21  
0.3  
0.35  
0.4

0.26  
0.34  
0.39  
0.37  
0.31  
0.36  
0.2  
0.38  
0.34  
0.2  
0.23  
0.21  
0.35  
0.3  
0.08  
0.09  
0.34  
0.38  
0.4  
0.39  
0.4  
0.33  
0.25  
0.39  
0.39  
0  
0.25  
0.4  
0.37  
0  
0.31  
0.17  
0.38  
0.36  
0.38  
0.35  
0.4  
0.38  
0.39  
0.25  
0.38  
0.37  
0.4  
0.39  
0.2  
0.38  
0.4  
0.37  
0.34  
0.4  
0.36  
0.39  
0.34

0.4  
0.35  
0.2  
0.32  
0.29  
0.38  
0.36  
0.29  
0.18  
0.4  
0.25  
0.21  
0.13  
0.36  
0.33  
0.4  
0.4  
0.4  
0.38  
0.35  
0.36  
0.39  
0.39  
0.37  
0.4  
0.19  
0.4  
0.35  
0.34  
0.25  
0.39  
0.35  
0.36  
0.34  
0.39  
0.2  
0.2  
0.39  
0.21  
0.28  
0.27  
0.21  
0.27  
0.33  
0.39  
0.16  
0.19  
0.2  
0.23  
0.21  
0.39  
0.21  
0.06

0.32  
0.34  
0.29  
0.28  
0.4  
0.36  
0.37  
0.31  
0.39  
0.36  
0.18  
0.28  
0.07  
0.39  
0.11  
0.28  
0.38  
0.14  
0.09  
0.2  
0.31  
0.38  
0.34  
0.37  
0.39  
0.4  
0.34  
0.4  
0.34  
0.29  
0.33  
0.28  
0.4  
0.33  
0.21  
0.36  
0.15  
0.4  
0.39  
0.39  
0.4  
0.34  
0.25  
0.07  
0.23  
0.26  
0.38  
0.32  
0.38  
0.39  
0.27  
0.34  
0.38

0.18  
0.36  
0.24  
0.25  
0.4  
0.39  
0.38  
0.4  
0.35  
0.22  
0.26  
0.4  
0.35  
0.3  
0.25  
0.4  
0.34  
0.34  
0.29  
0.35  
0.35  
0.37  
0.3  
0.34  
0.36  
0.26  
0.3  
0.39  
0.33  
0.37  
0.26  
0.17  
0.25  
0.3  
0.4  
0.32  
0.33  
0.35  
0.38  
0.29  
0.28  
0.11  
0.19  
0.17  
0.38  
0.24  
0.4  
0.4  
0.4  
0.26  
0.08  
0.25  
0.1

0.38  
0.27  
0.29  
0.4  
0.25  
0.17  
0.29  
0.21  
0.07  
0.15  
0.24  
0.35  
0.22  
0.38  
0.39  
0.17  
0.28  
0.4  
0.33  
0.4  
0.39  
0.37  
0.32  
0.23  
0.29  
0.13  
0.39  
0.34  
0.4  
0.31  
0.15  
0.25  
0.31  
0.15  
0.15  
0.15  
0.31  
0.38  
0.31  
0.22  
0.3  
0.4  
0.39  
0.4  
0.38  
0.31  
0.3  
0.15  
0.34  
0.36  
0.37  
0.07  
0.12



0.26  
0.15  
0.16  
0.23  
0.31  
0.39  
0.39  
0.39  
0.38  
0.39  
0.4  
0.34  
0.26  
0.32  
0.26  
0.28  
0.38  
0.4  
0.36  
0.32  
0.24  
0.35  
0.36  
0.2  
0.22  
0.16  
0.34  
0.36  
0.39  
0.3  
0.38  
0.36  
0.08  
0.36  
0.32  
0.39  
0.14  
0.36  
0.25  
0.39  
0.33  
0.36  
0.34  
0.21  
0.39  
0.17  
0.37  
0.35  
0.3  
0.33  
0.28  
0.31  
0.31

0.02  
0.3  
0.11  
0.38  
0.34  
0.36  
0.4  
0.4  
0.39  
0.23  
0.34  
0.26  
0.37  
0.37  
0.35  
0.23  
0.19  
0.16  
0.18  
0.33  
0.14  
0.24  
0.3  
0.39  
0.1  
0.38  
0.39  
0.25  
0.36  
0.37  
0.4  
0.35  
0.21  
0.26  
0.33  
0.35  
0.4  
0.38  
0.34  
0.4  
0.4  
0.36  
0.31  
0.37  
0.27  
0.37  
0.4  
0.38  
0.29  
0.39  
0.4  
0.39  
0.24

0.35  
0.39  
0.4  
0.39  
0.36  
0.34  
0.4  
0.28  
0.38  
0.2  
0.34  
0.31  
0.39  
0.28  
0.4  
0.11  
0.27  
0.4  
0.37  
0.34  
0.32  
0.35  
0.34  
0.27  
0.19  
0.38  
0.18  
0.21  
0.07  
0.24  
0.39  
0.38  
0.4  
0.24  
0.35  
0.18  
0.22  
0.36  
0.39  
0.31  
0.19  
0.37  
0.32  
0.39  
0.4  
0.25  
0.38  
0.17  
0.26  
0.33  
0.36  
0.38  
0.4

0.13  
0.28  
0.1  
0.31  
0.4  
0.37  
0.37  
0.35  
0.21  
0.23  
0.27  
0.32  
0.26  
0.39  
0.39  
0.4  
0.32  
0.36  
0.35  
0.18  
0.37  
0.37  
0.27  
0.34  
0.34  
0.23  
0.12  
0.34  
0.32  
0.13  
0.11  
0.15  
0.37  
0.24  
0.39  
0.33  
0.39  
0.34  
0.33  
0.32  
0.13  
0.34  
0.3  
0.39  
0.38  
0.29  
0.17  
0.16  
0.2  
0.37  
0.18  
0.3  
0.36

0.21  
0.38  
0.14  
0.39  
0.31  
0.38  
0.02  
0.16  
0.4  
0.38  
0.36  
0.17  
0.32  
0.39  
0.33  
0.35  
0.36  
0.35  
0.31  
0.23  
0.26  
0.25  
0.38  
0.12  
0.29  
0.35  
0.32  
0.25  
0.3  
0.26  
0.31  
0.26  
0.37  
0.3  
0.2  
0.24  
0.32  
0.36  
0.3  
0.27  
0.37  
0.4  
0.35  
0.29  
0.29  
0.17  
0.17  
0.15  
0.39  
0.25  
0.24  
0.2  
0.34

0.39  
0.32  
0.23  
0.11  
0.19  
0.33  
0.25  
0.25  
0.38  
0.4  
0.25  
0.34  
0.29  
0.32  
0.36  
0.11  
0.4  
0.25  
0.31  
0.33  
0.37  
0.12  
0.22  
0.39  
0.37  
0.13  
0.3  
0.08  
0.23  
0.38  
0.35  
0.28  
0.29  
0.16  
0.37  
0.26  
0.4  
0.29  
0.29  
0.38  
0.13  
0.25  
0.35  
0.16  
0.3  
0.19  
0.36  
0.37  
0.35  
0.14  
0.22  
0.11  
0.31

0.39  
0.26  
0.22  
0.17  
0.22  
0.17  
0.3  
0.3  
0.22  
0.19  
0.39  
0.31  
0.18  
0.32  
0.4  
0.12  
0.38  
0.33  
0.37  
0.34  
0.17  
0.33  
0.23  
0.17  
0.16  
0.16  
0.34  
0.2  
0.33  
0.4  
0.34  
0.37  
0.02  
0.3  
0.34  
0.38  
0.3  
0.36  
0.31  
0.4  
0.32  
0.19  
0.38  
0.39  
0.4  
0.36  
0.4  
0.37  
0.27  
0.13  
0.12  
0.14  
0.37

0.24  
0.37  
0.38  
0.28  
0.36  
0.25  
0.18  
0.39  
0.29  
0.4  
0.3  
0.25  
0.37  
0.37  
0.37  
0.15  
0.35  
0.4  
0.34  
0.28  
0.39  
0.3  
0.32  
0.27  
0.33  
0.11  
0.39  
0.25  
0.4  
0.22  
0.05  
0.36  
0.37  
0.37  
0.31  
0.23  
0.39  
0.34  
0.35  
0.33  
0.39  
0.35  
0.39  
0.29  
0.23  
0.27  
0.37  
0.29  
0.38  
0.33  
0.31  
0.71  
0.36



0.05  
0.24  
0.26  
0.34  
0.2  
0.31  
0.32  
0.36  
0.39  
0.4  
0.33  
0.39  
0.39  
0  
0.37  
0.36  
0.4  
0.19  
0.38  
0.28  
0.19  
0.32  
0.21  
0.38  
0.32  
0.17  
0.3  
0.33  
0.39  
0.4  
0.39  
0.39  
0.39  
0.32  
0.39  
0.38  
0.28  
0.4  
0.23  
0.3  
0.19  
0.24  
0.22  
0.31  
0.29  
0.22  
0.37  
0.36  
0.4  
0.39  
0.4  
0.4  
0.3

0.17  
0.04  
0.26  
0.2  
0.2  
0.26  
0.16  
0.2  
0.36  
0.26  
0.32  
0.19  
0.19  
0.33  
0.3  
0.24  
0.18  
0.39  
0.16  
0.38  
0.25  
0.15  
0.4  
0.39  
0.25  
0.18  
0.38  
0.4  
0.24  
0.27  
0.4  
0.31  
0.39  
0.38  
0.27  
0.14  
0.34  
0.4  
0.37  
0.22  
0.3  
0.3  
0.21  
0.23  
0.1  
0.18  
0.28  
0.38  
0.32  
0.38  
0.39  
0.35  
0.39

1  
0.11  
0.38  
0.4  
0.33  
0.4  
0.33  
0.38  
0.28  
0.23  
0.35  
0.39  
0.38  
0.24  
0.39  
0.38  
0.32  
0.19  
0.34  
0.38  
0.15  
0.39  
0.2  
0.17  
0.22  
0.36  
0.4  
0.16  
0.16  
0.25  
0.29  
0.3  
0.4  
0.39  
0.3  
0.37  
0.39  
0.18  
0.29  
0.34  
0.21  
0.21  
0.19  
0.39  
0.28  
0.31  
0.32  
0.39  
0.32  
0.39  
0.39  
0.29  
0.34

0.2  
0.21  
0.38  
0.38  
0.38  
0.32  
0.4  
0.27  
0.39  
0.36  
0.25  
0.4  
0.17  
0.3  
0.38  
0.34  
0.19  
0.35  
0.28  
0.22  
0.2  
0.14  
0.11  
0.22  
0.1  
0.26  
0.22  
0.35  
0.22  
0.32  
0.28  
0.37  
0.39  
0.4  
0.38  
0.38  
0.38  
0.38  
0.3  
0.3  
0.34  
0.36  
0.3  
0.17  
0.19  
0.16  
0.1  
0.21  
0.38  
0.39  
0.28  
0.16  
0.23

0.37  
0.39  
0.4  
0.31  
0.22  
0.4  
0.33  
0.29  
0.38  
0.17  
0.26  
0.25  
0.39  
0.36  
0.38  
0.37  
0  
0.36  
0.25  
0.34  
0.15  
0.22  
0.2  
0.3  
0.29  
0.38  
0.38  
0.34  
0.37  
0.37  
0.4  
0.34  
0.37  
0.36  
0.13  
0.38  
0.23  
0.4  
0.39  
0.39  
0.4  
0.22  
0.3  
0.28  
0.26  
0.36  
0.23  
0.19  
0.31  
0.2  
0.2  
0.39  
0.35

0.39  
0.38  
0.28  
0.12  
0.32  
0.4  
0.18  
0.16  
0.15  
0.2  
0.32  
0.4  
0.35  
0.38  
0.38  
0.32  
0.05  
0.38  
0.38  
0.31  
0.35  
0.35  
0.31  
0.27  
0.36  
0.32  
0.32  
0.09  
0.27  
0.13  
0.34  
0.3  
0.22  
0.35  
0.37  
0.09  
0.28  
0.38  
0.2  
0.16  
0.22  
0.26  
0.19  
0.2  
0.21  
0.18  
0.33  
0.4  
0.31  
0.31  
0.11  
0.14  
0.29

0.23  
0.35  
0.28  
0.38  
0.29  
0.22  
0.3  
0.38  
0.4  
0.22  
0.25  
0.35  
0.15  
0.26  
0.22  
0.27  
0.4  
0.17  
0.39  
0.32  
0.26  
0.08  
0.15  
0.37  
0.24  
0.1  
0.36  
0.1  
0.29  
0.17  
0.38  
0.16  
0.39  
0.36  
0.29  
0.21  
0.29  
0.29  
0.29  
0.24  
0.19  
0.25  
0.24  
0.23  
0.3  
0.29  
0.26  
0.17  
0.31  
0.39  
0.39  
0.28  
0.27

0.35  
0.26  
0.39  
0.36  
0.35  
0.37  
0.36  
0.38  
0.35  
0.22  
0.4  
0.4  
0.32  
0.12  
0.1  
0.33  
0.27  
0.13  
0.37  
0.4  
0.38  
0.29  
0.2  
0.36  
0.4  
0.35  
0.16  
0.23  
0.35  
0.33  
0.11  
0.39  
0.39  
0.39  
0.35  
0.4  
0.33  
0.38  
0.4  
0.36  
0.31  
0.21  
0.18  
0.39  
0.3  
0.26  
0.16  
0.23  
0.21  
0.3  
0.25  
0.21  
0.17



0.35  
0.4  
0.33  
0.33  
0.4  
0.28  
0.39  
0.4  
0.28  
0.34  
0.13  
0.21  
0.37  
0.12  
0.39  
0.33  
0.3  
0.35  
0.37  
0.38  
0.4  
0.39  
0.39  
0.06  
0.17  
0.4  
0.21  
0.33  
0.29  
0.3  
0.36  
0.34  
0.37  
0.37  
0.3  
0.25  
0.34  
0.26  
0.19  
0.4  
0.32  
0.32  
0.34  
0.35  
0.25  
0.36  
0.33  
0.37  
0.36  
0.33  
0.22  
0.4  
0.31

0.27  
0.27  
0.36  
0.33  
0.31  
0.21  
0.38  
0.3  
0.35  
0.18  
0.22  
0.21  
0.3  
0.37  
0.1  
0.36  
0.35  
0.19  
0.07  
0.34  
0.39  
0.14  
0.23  
0.4  
0.4  
0.11  
0.36  
0.37  
0.02  
0.38  
0.31  
0.2  
0.34  
0.31  
0.37  
0.4  
0.28  
0.39  
0.37  
0.38  
0.33  
0.27  
0.1  
0.29  
0.09  
0.21  
0.24  
0.36  
0.17  
0.15  
0.23  
0.38  
0.25

0.12  
0.32  
0.23  
0.16  
0.34  
0.38  
0.24  
0.18  
0.4  
0.18  
0.28  
0.32  
0.38  
0.37  
0.26  
0.21  
0.17  
0.38  
0.29  
0.36  
0.26  
0.4  
0.26  
0.27  
0.1  
0.2  
0.1  
0.18  
0.29  
0.28  
0.29  
0.38  
0.22  
0.39  
0.29  
0.3  
0.4  
0.39  
0.29  
0.4  
0.25  
0.32  
0.38  
0.31  
0.32  
0.1  
0.4  
0.33  
0.26  
0.31  
0.38  
0.14  
0.39

0.28  
0.3  
0.4  
0.14  
0.27  
0.4  
0.4  
0.14  
0.32  
0.39  
0.39  
0.39  
0.39  
0.35  
0.36  
0.4  
0.35  
0.08  
0.13  
0.16  
0.25  
0.4  
0.39  
0.24  
0.35  
0.4  
0.39  
0.35  
0.32  
0.4  
0.09  
0.31  
0.36  
0.4  
0.38  
0.3  
0.12  
0.27  
0.23  
0.07  
0.36  
0.38  
0.16  
0.21  
0.16  
0.27  
0.24  
0.2  
0.35  
0.4  
0.37  
0.26

0.31  
0.24  
0.38  
0.3  
0.3  
0.39  
0.39  
0.2  
0.17  
0.4  
0.27  
0.24  
0.12  
0.29  
0.09  
0.32  
0.39  
0.39  
0.2  
0.25  
0.31  
0.25  
0.38  
0.27  
0.21  
0.21  
0.34  
0.35  
0.38  
0.38  
0.39  
0.32  
0.34  
0.38  
0.08  
0.22  
0.32  
0.36  
0.39  
0.4  
0.35  
0.4  
0.38  
0.39  
0.4  
0.21  
0.23  
0.08  
0.3  
0.27  
0.16  
0.26  
0.34

0.38  
0.36  
0.38  
0.07  
0.38  
0.27  
0.31  
0.4  
0.25  
0.21  
0.15  
0.28  
0.2  
0.09  
0.37  
0.19  
0.31  
0.12  
0.27  
0.16  
0.35  
0.32  
0.4  
0.27  
0.19  
0.29  
0.37  
0.07  
0.4  
0.4  
0.21  
0.17  
0.35  
0.39  
0.4  
0.4  
0.29  
0.31  
0.26  
0.34  
0.32  
0.28  
0.24  
0.31  
0.36  
0.31  
0.14  
0.34  
0.38  
0.26  
0.39  
0.37  
0.36

0.38  
0.33  
0.37  
0.24  
0.33  
0.27  
0.29  
0.4  
0.32  
0.17  
0.4  
0.33  
0.4  
0.36  
0.34  
0.14  
0.37  
0.22  
0.33  
0.25  
0.28  
0.11  
0.37  
0.24  
0.26  
0.27  
0.28  
0.11  
0.33  
0.13  
0.28  
0.11  
0.16  
0.37  
0.24  
0.09  
0.17  
0.12  
0.31  
0.39  
0.28  
0.4  
0.37  
0.38  
0.39  
0.24  
0.33  
0.39  
0.38  
0.31  
0.38  
0.4  
0.33

0.35  
0.26  
0.34  
0.37  
0.4  
0.39  
0.39  
0.21  
0.3  
0.38  
0.22  
0.35  
0.4  
0.37  
0.35  
0.33  
0  
0.36  
0.32  
0.35  
0.34  
0.4  
0.38  
0.34  
0.38  
0.38  
0.36  
0.36  
0.29  
0.29  
0.38  
0.33  
0.39  
0.13  
0.13  
0.2  
0.15  
0.06  
0.32  
0.16  
0.19  
0.15  
0.23  
0.15  
0.4  
0.32  
0.39  
0.35  
0.14  
0.23  
0.31  
0.4  
0.28



0.12  
0.4  
0.39  
0.4  
0.39  
0.34  
0.36  
0.34  
0.3  
0.37  
0.39  
0.36  
0.3  
0.36  
0.23  
0.16  
0.35  
0.2  
0.19  
0.4  
0.34  
0.33  
0.37  
0.38  
0.25  
0.4  
0.16  
0.3  
0.26  
0.28  
0.37  
0.23  
0.21  
0.36  
0.39  
0.38  
0.29  
0.26  
0.31  
0.28  
0.4  
0.36  
0.38  
0.36  
0.24  
0.22  
0.25  
0.1  
0.23  
0.4  
0.33  
0.38  
0.26

0.19  
0.2  
0.32  
0.22  
0.31  
0.36  
0.39  
0.32  
0.32  
0.32  
0.38  
0.36  
0  
0.3  
0.36  
0.37  
0.39  
0.37  
0.29  
0.36  
0.38  
0.38  
0.38  
0.37  
0.39  
0.4  
0.37  
0.4  
0.35  
0.18  
0.31  
0.17  
0.2  
0.16  
0.2  
0.3  
0.39  
0.38  
0.4  
0.34  
0.32  
0.24  
0.39  
0.4  
0.32  
0.29  
0.29  
0.23  
0.31  
0.34  
0.29  
0.37  
0.34

0.31  
0.39  
0.24  
0.28  
0.4  
0.38  
0.33  
0.4  
0.07  
0.27  
0.34  
0.31  
0.24  
0.27  
0.16  
0.27  
0.17  
0.37  
0.35  
0.34  
0.23  
0.29  
0.37  
0.38  
0.32  
0.14  
0.22  
0.38  
0.38  
0.27  
0.4  
0.38  
0.26  
0.4  
0.29  
0.38  
0.32  
0.29  
0.29  
0.25  
0.38  
0.4  
0.23  
0.1  
0  
0.29  
0.39  
0.39  
0.36  
0.37  
0.4  
0.38  
0.39

0.25  
0.4  
0.38  
0.38  
0.39  
0.39  
0.4  
0.39  
0.36  
0.19  
0.15  
0.4  
0.26  
0.31  
0.38  
0.32  
0.25  
0.29  
0.28  
0.31  
0.18  
0.38  
0.14  
0.28  
0.17  
0.29  
0.2  
0.36  
0.33  
0.25  
0.3  
0.29  
0.35  
0.33  
0.29  
0.33  
0.31  
0.33  
0.4  
0.37  
0.4  
0.28  
0.32  
0.25  
0.39  
0.34  
0.4  
0.39  
0.25  
0.38  
0.36  
0.12  
0.37

0.15  
0.34  
0.23  
0.36  
0.35  
0.12  
0.21  
0.38  
0.39  
0.4  
0.14  
0.24  
0.22  
0.31  
0.24  
0.22  
0.38  
0.21  
0.32  
0.35  
0.4  
0.38  
0.33  
0.37  
0.4  
0.4  
0.33  
0.38  
0.39  
0.3  
0.4  
0.32  
0.19  
0.36  
0.3  
0.24  
0.38  
0.4  
0.38  
0.4  
0.4  
0.26  
0.36  
0.39  
0.1  
0.09  
0.17  
0.1  
0.32  
0.38  
0.38  
0.37  
0.4

0.4  
0.4  
0.38  
0.38  
0.38  
0.4  
0.4  
0.23  
0.39  
0.4  
0.22  
0.39  
0.38  
0.28  
0.37  
0.31  
0.36  
0.32  
0.21  
0.28  
0.35  
0.16  
0.36  
0.2  
0.37  
0.38  
0.07  
0.39  
0.35  
0.26  
0.26  
0.25  
0.33  
0.4  
0.38  
0.39  
0.22  
0.3  
0.28  
0.26  
0.35  
0.29  
0.22  
0.33  
0.38  
0.2  
0.37  
0.28  
0.4  
0.36  
0.31  
0.4  
0.28

0.36  
0.17  
0.18  
0.28  
0.39  
0.39  
0.33  
0.1  
0.12  
0.4  
0.32  
0.09  
0.25  
0.39  
0.38  
0.16  
0.32  
0.21  
0.3  
0.32  
0.21  
0.38  
0.39  
0.31  
0.37  
0.31  
0.25  
0.34  
0.27  
0.13  
0.15  
0.25  
0.36  
0.38  
0.28  
0.28  
0.38  
0.4  
0.4  
0.37  
0.4  
0.38  
0.39  
0.4  
0.1  
0.26  
0.4  
0.17  
0.38  
0.15  
0.39  
0.36  
0.38

0.25  
0.38  
0.4  
0.4  
0.29  
0.4  
0.26  
0.18  
0.35  
0.37  
0.39  
0.38  
0.4  
0.4  
0.22  
0.4  
0.39  
0.36  
0.35  
0.28  
0.39  
0.39  
0.4  
0.4  
0.37  
0.37  
0.38  
0.26  
0.36  
0.33  
0.21  
0.39  
0.4  
0.4  
0.31  
0.12  
0.38  
0.35  
0.4  
0.12  
0.21  
0.23  
0.33  
0.36  
0.4  
0.4  
0.3  
0.37  
0.37  
0.19  
0.29  
0.23  
0.32



0.39  
0.34  
0.21  
0.18  
0.26  
0.33  
0.27  
0.27  
0.4  
0.37  
0.36  
0.37  
0.35  
0.27  
0.36  
0.27  
0.32  
0.37  
0.22  
0.21  
0.33  
0.39  
0.39  
0.31  
0.4  
0.37  
0.39  
0.15  
0.24  
0.3  
0.32  
0.25  
0.17  
0.31  
0.33  
0.39  
0.22  
0.39  
0.36  
0.34  
0.39  
0.36  
0.31  
0.4  
0.22  
0.3  
0.37  
0.31  
0.13  
0.28  
0.34  
0.36  
0.35

0.36  
0.31  
0.32  
0.37  
0.29  
0.28  
0.25  
0.32  
0.3  
0.36  
0.14  
0.11  
0.07  
0.17  
0.24  
0.22  
0.34  
0.22  
0.37  
0.27  
0.34  
0.3  
0.16  
0.15  
0.11  
0.3  
0.34  
0.39  
0.34  
0.4  
0.37  
0.36  
0.17  
0.26  
0.14  
0.24  
0.16  
0.12  
0.35  
0.21  
0.27  
0.24  
0.33  
0.4  
0.37  
0.36  
0.36  
0.2  
0.23  
0.33  
0.31  
0.35  
0.25

0.31  
0.38  
0.27  
0.36  
0.4  
0.38  
0.26  
0.34  
0.36  
0.38  
0.26  
0.36  
0.39  
0.35  
0.14  
0.1  
0.19  
0.15  
0.2  
0.36  
0.38  
0.39  
0.26  
0.4  
0.39  
0.3  
0.32  
0.23  
0.36  
0.22  
0.39  
0.33  
0.39  
0.37  
0.27  
0.35  
0.32  
0.28  
0.34  
0.23  
0.28  
0.29  
0.39  
0.31  
0.37  
0.39  
0.28  
0.31  
0.4  
0.4  
0.37  
0.24  
0.24

0.26  
0.19  
0.36  
0.33  
0.35  
0.35  
0.19  
0.27  
0.18  
0.35  
0.16  
0.29  
0.1  
0.4  
0.39  
0.32  
0.25  
0.34  
0.35  
0.31  
0.4  
0.32  
0.38  
0.35  
0.35  
0.35  
0.35  
0.21  
0.4  
0.4  
0.39  
0.32  
0.06  
0.36  
0.18  
0.2  
0.25  
0.4  
0.05  
0.4  
0.24  
0.18  
0.34  
0.36  
0.38  
0.35  
0.38  
0.38  
0.35  
0.4  
0.35  
0.26  
0.17

0.27  
0.24  
0.21  
0.39  
0.33  
0.22  
0.08  
0.13  
0.14  
0.27  
0.27  
0.38  
0.23  
0.37  
0.39  
0.34  
0.31  
0.35  
0.34  
0.39  
0.18  
0.17  
0.08  
0.32  
0.2  
0.32  
0.37  
0.37  
0.13  
0.15  
0.22  
0.38  
0.38  
0.34  
0.38  
0.4  
0.37  
0.31  
0.38  
0.35  
0.36  
0.36  
0.37  
0.34  
0.33  
0.15  
0.39  
0.36  
0.38  
0.26  
0.08  
0.32  
0.4

0.35  
0.28  
0.12  
0.2  
0.31  
0.26  
0.18  
0.4  
0.35  
0.39  
0.28  
0.25  
0.19  
0.39  
0.36  
0.36  
0.16  
0.34  
0.17  
0.04  
0.37  
0.38  
0.22  
0.39  
0.34  
0.36  
0.22  
0.24  
0.22  
0.14  
0.38  
0.4  
0.35  
0.36  
0.28  
0.4  
0.38  
0.39  
0.4  
0.34  
0.28  
0.34  
0.25  
0.35  
0.27  
0.36  
0.35  
0.17  
0.4  
0.4  
0.39  
0.39  
0.29

0.34  
0.35  
0.29  
0.18  
0.29  
0.39  
0.4  
0.29  
0.38  
0.39  
0.4  
0.35  
0.4  
0.39  
0.35  
0.11  
0.39  
0.11  
0.39  
0.39  
0.36  
0.22  
0.28  
0.21  
0.39  
0.38  
0.39  
0.37  
0.34  
0.38  
0.36  
0.34  
0.39  
0.39  
0.2  
0.38  
0.37  
0.38  
0.4  
0.39  
0.4  
0.4  
0.29  
0.34  
0.13  
0.4  
0.31  
0.24  
0.34  
0.2  
0.24  
0.35  
0.39

0.27  
0.32  
0.38  
0.4  
0.4  
0.4  
0.15  
0.24  
0.28  
0.26  
0.31  
0.34  
0.4  
0.34  
0.32  
0.37  
0.19  
0.34  
0.37  
0.67  
0.36  
0.36  
0.4  
0.38  
0.38  
0.37  
0.38  
0.38  
0.36  
0.39  
0.35  
0.29  
0.18  
0.37  
0.36  
0.34  
0.28  
0.3  
0.33  
0.19  
0.27  
0.4  
0  
0.19  
0.36  
0.39  
0.24  
0.16  
0.12  
0.15  
0.23  
0.39  
0.35



0.24  
0.19  
0.36  
0.39  
0.27  
0.36  
0.36  
0.31  
0.35  
0.29  
0.34  
0.4  
0.37  
0.18  
0.21  
0.15  
0.22  
0.4  
0.29  
0.09  
0.33  
0.3  
0.35  
0.06  
0.39  
0.38  
0.17  
0.39  
0.35  
0.38  
0.4  
0.38  
0.37  
0.07  
0.39  
0.38  
0.38  
0.39  
0.39  
0.39  
0.38  
0.33  
0.19  
0.35  
0.38  
0.4  
0.32  
0.34  
0.39  
0.35  
0.36  
0.36  
0.36

0.35  
0.4  
0.18  
0.17  
0.38  
0.4  
0.23  
0.17  
0.4  
0.25  
0.23  
0.17  
0.37  
0.33  
0.19  
0.35  
0.21  
0.38  
0.35  
0.1  
0.38  
0.26  
0.39  
0.23  
0.14  
0.39  
0.33  
0.15  
0.35  
0.32  
0.32  
0.2  
0.32  
0.2  
0.05  
0  
0.38  
0.4  
0.36  
0.4  
0.39  
0.4  
0.38  
0.4  
0.27  
0.4  
0.38  
0.39  
0.4  
0.4  
0.39  
0.3  
0.4

0.4  
0.4  
0.39  
0.39  
0.13  
0.2  
0.4  
0.38  
0.21  
0.39  
0.35  
0.27  
0.14  
0.29  
0.21  
0.2  
0.24  
0.17  
0.39  
0.38  
0.12  
0.37  
0.19  
0.36  
0.37  
0.4  
0.38  
0.4  
0.36  
0.37  
0.26  
0.25  
0.29  
0.38  
0.33  
0.4  
0.37  
0.29  
0.32  
0.39  
0.39  
0.38  
0.4  
0.39  
0.35  
0.16  
0.37  
0.34  
0.34  
0.34  
0.36  
0.28  
0.35

0.23  
0.24  
0.36  
0.25  
0.15  
0.39  
0.37  
0.18  
0.16  
0.25  
0.12  
0.23  
0.31  
0.4  
0.35  
0.17  
0.36  
0.35  
0.11  
0.14  
0.22  
0.39  
0.35  
0.36  
0.35  
0.24  
0.39  
0.21  
0.4  
0.29  
0.23  
0.25  
0.37  
0.33  
0.31  
0.38  
0.3  
0.38  
0.19  
0.35  
0.3  
0.23  
0.15  
0.14  
0.27  
0.39  
0.31  
0.36  
0.36  
0.4  
0.25  
0.39  
0.35

0.31  
0.37  
0.23  
0.14  
0.05  
0.33  
0.4  
0.39  
0.29  
0.36  
0.23  
0.23  
0.29  
0.22  
0.39  
0.31  
0.33  
0.27  
0.39  
0.37  
0.29  
0.23  
0.28  
0.39  
0.36  
0.14  
0.23  
0.34  
0.4  
0.37  
0.37  
0.33  
0.36  
0.33  
0.33  
0.39  
0.34  
0.39  
0.21  
0.29  
0.31  
0.05  
0.4  
0.4  
0.4  
0.32  
0.29  
0.39  
0.37  
0.4  
0.21  
0.22  
0.38

0.26  
0.16  
0.16  
0.21  
0.4  
0.38  
0.35  
0.35  
0.4  
0.36  
0.38  
0.29  
0.23  
0.21  
0.33  
0.17  
0.28  
0.3  
0.1  
0.26  
0.28  
0.29  
0.29  
0.18  
0.23  
0.23  
0.27  
0.35  
0.33  
0.28  
0.32  
0.11  
0.3  
0.39  
0.4  
0.26  
0.18  
0.12  
0.37  
0.4  
0.38  
0.38  
0.16  
0.4  
0.21  
0.36  
0.13  
0.1  
0.4  
0.29  
0.4  
0.39  
0.35

0.39  
0.14  
0.38  
0.3  
0.14  
0.36  
0.36  
0.27  
0.39  
0.4  
0.35  
0.32  
0.16  
0.36  
0.13  
0.22  
0.19  
0.2  
0.39  
0.2  
0.34  
0.32  
0.14  
0.35  
0.33  
0.26  
0.18  
0.35  
0.3  
0.4  
0.36  
0.39  
0.38  
0.4  
0.38  
0.31  
0.26  
0.27  
0.26  
0.27  
0.4  
0.28  
0.34  
0.27  
0.37  
0.31  
0.34  
0.38  
0.08  
0.39  
0.09  
0.31  
0.38

0.38  
0.35  
0.35  
0.14  
0.21  
0.4  
0.2  
0.29  
0.39  
0.21  
0.27  
0.28  
0.4  
0.09  
0.25  
0.34  
0.24  
0.21  
0.33  
0.33  
0.34  
0.34  
0.39  
0.36  
0.28  
0.15  
0.23  
0.31  
0.2  
0.17  
0.04  
0.37  
0.21  
0.4  
0.32  
0.11  
0.2  
0.2  
0.3  
0.2  
0.13  
0.39  
0.4  
0.4  
0.38  
0.37  
0.29  
0.37  
0.16  
0.31  
0.37  
0.39  
0.35



0.27  
0.29  
0.1  
0.12  
0.22  
0.25  
0.21  
0.32  
0.32  
0.24  
0.4  
0.38  
0.17  
0.3  
0.4  
0.15  
0.36  
0.23  
0.26  
0.16  
0.28  
0.27  
0.38  
0.36  
0.33  
0.4  
0.32  
0.37  
0.35  
0.34  
0.4  
0.32  
0.34  
0.38  
0.22  
0.35  
0.32  
0.38  
0.31  
0.3  
0.38  
0.3  
0.4  
0.39  
0.36  
0.39  
0.4  
0.39  
0.38  
0.26  
0.4  
0.33  
0.4

0.13  
0.38  
0.34  
0.39  
0.22  
0.33  
0.4  
0.35  
0.28  
0.27  
0.24  
0.35  
0.38  
0.3  
0.24  
0.08  
0.25  
0.36  
0.13  
0.39  
0.39  
0.4  
0.37  
0.36  
0.4  
0.29  
0.32  
0.4  
0.29  
0.29  
0.36  
0.39  
0.27  
0.12  
0.16  
0.21  
0.23  
0.12  
0.33  
0.3  
0.31  
0.37  
0.07  
0.32  
0.38  
0.23  
0.37  
0.4  
0.36  
0.28  
0.4  
0.28  
0.37

0.38  
0.33  
0.32  
0.38  
0.22  
0.09  
0.35  
0.39  
0.2  
0.4  
0.28  
0.4  
0.35  
0.39  
0.31  
0.33  
0.36  
0.38  
0.31  
0.36  
0.29  
0.31  
0.38  
0.39  
0.39  
0.37  
0.29  
0.21  
0.11  
0.35  
0.29  
0.37  
0.38  
0.25  
0.3  
0.39  
0.18  
0.33  
0.16  
0.35  
0.35  
0.33  
0.27  
0.23  
0.3  
0.3  
0.4  
0.37  
0.38  
0.1  
0.16  
0.39  
0.39

0.37  
0.35  
0.36  
0.22  
0.29  
0.2  
0.36  
0.32  
0.38  
0.26  
0.14  
0.1  
0.31  
0.36  
0.15  
0.34  
0.33  
0.23  
0.15  
0.16  
0.26  
0.35  
0.38  
0.38  
0.17  
0.12  
0.31  
0.22  
0.15  
0.26  
0.39  
0.39  
0.39  
0.31  
0.27  
0.4  
0.2  
0.25  
0.12  
0.39  
0.39  
0.4  
0.4  
0.21  
0.36  
0.34  
0.33  
0.32  
0.09  
0.3  
0.16  
0.38  
0.34

0.31  
0.18  
0.15  
0.39  
0.38  
0.27  
0.3  
0.24  
0.16  
0.39  
0.33  
0.32  
0.37  
0.39  
0.33  
0.37  
0.4  
0.12  
0.14  
0.03  
0.4  
0.19  
0.36  
0.32  
0.36  
0.21  
0.4  
0.26  
0.13  
0.37  
0.38  
0.38  
0.38  
0.12  
0.27  
0.18  
0.18  
0.27  
0.36  
0.39  
0.24  
0.39  
0.22  
0.4  
0.32  
0.37  
0.02  
0.35  
0.28  
0.21  
0.39  
0.4  
0.23

0.38  
0.39  
0.17  
0.26  
0.22  
0.17  
0.27  
0.24  
0.35  
0.38  
0.31  
0.33  
0.21  
0.24  
0.4  
0.39  
0.38  
0.25  
0.22  
0.23  
0.13  
0.16  
0.32  
0.35  
0.37  
0.08  
0.37  
0.31  
0.34  
0.36  
0.4  
0.39  
0.24  
0.34  
0.33  
0.37  
0.38  
0.4  
0.2  
0.18  
0.2  
0.39  
0.17  
0.4  
0.39  
0.18  
0.23  
0.29  
0.38  
0.15  
0.4  
0.4  
0.35

0.22  
0.25  
0.17  
0.23  
0.23  
0.15  
0.35  
0.34  
0.25  
0.34  
0.38  
0.4  
0.36  
0.37  
0.23  
0.36  
0.33  
0.16  
0.38  
0.33  
0.13  
0.4  
0.28  
0.27  
0.39  
0.39  
0.38  
0.31  
0.33  
0.39  
0.39  
0.4  
0.25  
0.24  
0.31  
0.35  
0.39  
0.19  
0.2  
0.24  
0.37  
0.17  
0.38  
0.33  
0.39  
0.2  
0.15  
0.35  
0.39  
0.3  
0.27  
0.32  
0.22

0.14  
0.33  
0.12  
0.32  
0.38  
0.39  
0.4  
0.33  
0.36  
0.23  
0.37  
0.32  
0.28  
0.39  
0.19  
0.23  
0.32  
0.28  
0.26  
0.27  
0.13  
0.13  
0.34  
0.27  
0.15  
0.28  
0.22  
0.36  
0.37  
0.39  
0.37  
0.3  
0.13  
0.18  
0.4  
0.33  
0.19  
0.36  
0.37  
0.39  
0.39  
0.36  
0.39  
0.39  
0.34  
0.38  
0.2  
0.33  
0.22  
0.23  
0.19  
0.06  
0.33



0.38  
0.37  
0.23  
0.25  
0.36  
0.4  
0.38  
0.27  
0.39  
0.38  
0.39  
0.24  
0.39  
0.33  
0.37  
0.37  
0.39  
0.39  
0.33  
0.33  
0.39  
0.36  
0.3  
0.36  
0.39  
0.4  
0.39  
0.38  
0.13  
0.36  
0.36  
0.22  
0.31  
0.11  
0.29  
0.33  
0.33  
0.38  
0.31  
0.36  
0.38  
0.4  
0.04  
0.32  
0.29  
0.22  
0.4  
0.32  
0.39  
0.24  
0.28  
0.35  
0.37

0.26  
0.14  
0.3  
0.4  
0.21  
0.27  
0.37  
0.4  
0.38  
0.37  
0.38  
0.38  
0.34  
0.1  
0.32  
0.38  
0.25  
0.32  
0.16  
0.21  
0.23  
0.24  
0.37  
0.36  
0.39  
0.25  
0.09  
0.13  
0.34  
0.31  
0.21  
0.37  
0.33  
0.1  
0.35  
0.08  
0.17  
0.28  
0.15  
0.27  
0.24  
0.32  
0.29  
0.17  
0.3  
0.18  
0.37  
0.21  
0.18  
0.38  
0.26  
0.36  
0.32

0.38  
0.31  
0.39  
0.38  
0.39  
0.39  
0.37  
0.38  
0.32  
0.14  
0.4  
0.2  
0.33  
0.34  
0.32  
0.26  
0.07  
0.19  
0.35  
0.33  
0.13  
0.28  
0.39  
0.38  
0.37  
0.08  
0.33  
0.3  
0.39  
0.39  
0.32  
0.26  
0.39  
0.29  
0.25  
0.09  
0.1  
0.39  
0.36  
0.37  
0.39  
0.37  
0.36  
0.36  
0.16  
0.38  
0.23  
0.34  
0.13  
0.29  
0.27  
0.23  
0.25

0.36  
0.36  
0.29  
0.3  
0.14  
0.21  
0.4  
0.32  
0.16  
0.21  
0.37  
0.38  
0.4  
0.33  
0.39  
0.4  
0.29  
0.31  
0.3  
0.39  
0.38  
0.33  
0.4  
0.4  
0.39  
0.34  
0.4  
0.35  
0.4  
0.4  
0.4  
0.4  
0.37  
0.39  
0.38  
0.21  
0.4  
0.25  
0.36  
0.4  
0.4  
0.4  
0.39  
0.4  
0.2  
0.34  
0.39  
0.4  
0.36  
0.33  
0.4  
0.27  
0.21

0.39  
0.36  
0.34  
0.23  
0.37  
0.36  
0.35  
0.35  
0.35  
0.28  
0.25  
0.23  
0.4  
0.4  
0.27  
0.21  
0.34  
0.26  
0.23  
0.32  
0.28  
0.29  
0.21  
0.31  
0.28  
0.36  
0.4  
0.29  
0.35  
0.29  
0.35  
0.36  
0.36  
0.4  
0.13  
0.37  
0.31  
0.18  
0.33  
0.11  
0.29  
0.07  
0.36  
0.4  
0.39  
0.39  
0.32  
0.31  
0.4  
0.33  
0.26  
0.4  
0.39

0.31  
0.32  
0.36  
0.27  
0.38  
0.39  
0.35  
0.4  
0.31  
0.37  
0.31  
0.28  
0.33  
0.4  
0.39  
0.27  
0.4  
0.21  
0.33  
0.4  
0.37  
0.34  
0.33  
0.15  
0.24  
0.23  
0.38  
0.28  
0.38  
0.38  
0.16  
0.21  
0.38  
0.2  
0.27  
0.16  
0.23  
0.29  
0.37  
0.26  
0.34  
0.32  
0.26  
0.4  
0.33  
0.35  
0.16  
0.2  
0.2  
0.21  
0.39  
0.18  
0.16

0.39  
0.27  
0.26  
0.19  
0.33  
0.4  
0.17  
0.38  
0.11  
0.19  
0.34  
0.26  
0.29  
0.3  
0.4  
0.24  
0.33  
0.3  
0.19  
0.18  
0.39  
0.19  
0.31  
0.19  
0.4  
0.36  
0.34  
0.1  
0.4  
0.37  
0.14  
0.02  
0  
0.02  
0.23  
0.28  
0.32  
0.4  
0.36  
0.19  
0.25  
0.25  
0.27  
0.14  
0.38  
0.35  
0.4  
0.37  
0.39  
0.08  
0.22  
0.36  
0.15

0.4  
0.34  
0.24  
0.39  
0.34  
0.28  
0.37  
0.31  
0.38  
0.06  
0.03  
0.3  
0.29  
0.37  
0.36  
0.23  
0.32  
0.31  
0.3  
0.19  
0.37  
0.34  
0.33  
0.32  
0.31  
0.39  
0.33  
0.33  
0.39  
0.38  
0.28  
0.38  
0.31  
0.2  
0.31  
0.2  
0.24  
0.32  
0.35  
0.24  
0.22  
0.35  
0.31  
0.17  
0.27  
0.39  
0.35  
0.2  
0.39  
0.32  
0.23  
0.18  
0.37



0.25  
0.4  
0.31  
0.36  
0.31  
0.3  
0.34  
0.33  
0.35  
0.18  
0.36  
0.17  
0.36  
0.33  
0.26  
0.16  
0.17  
0.3  
0.2  
0.22  
0.4  
0.11  
0.16  
0.39  
0.26  
0.06  
0.22  
0.39  
0.34  
0.23  
0.38  
0.39  
0.37  
0.08  
0.39  
0.08  
0.32  
0.11  
0.3  
0.32  
0.34  
0.21  
0.24  
0.36  
0.38  
0.36  
0.26  
0.31  
0.38  
0.4  
0.32  
0.13  
0.36

0.25  
0.3  
0.19  
0.17  
0.26  
0.38  
0.38  
0.33  
0.19  
0.37  
0.21  
0.37  
0.39  
0.39  
0.39  
0.35  
0.15  
0.28  
0.28  
0.12  
0.2  
0.12  
0.23  
0.22  
0.11  
0.07  
0.26  
0.4  
0.19  
0.12  
0.22  
0.26  
0.31  
0.31  
0.29  
0.4  
0.13  
0.2  
0.2  
0.39  
0.33  
0.36  
0.4  
0.22  
0.31  
0.26  
0.29  
0.2  
0.31  
0.35  
0.27  
0.28  
0.16

0.4  
0.25  
0.34  
0.4  
0.3  
0.35  
0.31  
0.34  
0.31  
0.17  
0.36  
0.4  
0.4  
0.4  
0.36  
0.22  
0.17  
0.06  
0.33  
0.2  
0.28  
0.17  
0.31  
0.33  
0.3  
0.39  
0.28  
0.33  
0.3  
0.2  
0.3  
0.21  
0.4  
0.4  
0.24  
0.39  
0.38  
0.34  
0.22  
0.31  
0.38  
0.39  
0.16  
0.33  
0.21  
0.35  
0.39  
0.35  
0.29  
0.29  
0.21  
0.31  
0.39

0.28  
0.23  
0.37  
0.36  
0.35  
0.36  
0.29  
0.14  
0.39  
0.39  
0.33  
0.4  
0.37  
0.35  
0.3  
0.35  
0.33  
0.18  
0.33  
0.39  
0.29  
0.39  
0.21  
0.2  
0.3  
0.4  
0.38  
0.39  
0.31  
0.38  
0.36  
0.36  
0.4  
0.13  
0.37  
0.34  
0.18  
0.4  
0.28  
0.32  
0.31  
0.21  
0.34  
0.31  
0.4  
0.19  
0.38  
0.4  
0.33  
0.34  
0.4  
0.37  
0.05

0.16  
0.34  
0.27  
0.33  
0.25  
0.39  
0.32  
0.21  
0.31  
0.38  
0.4  
0.39  
0.38  
0.23  
0.38  
0.34  
0.36  
0.18  
0.2  
0.16  
0.25  
0.32  
0.28  
0.29  
0.38  
0.36  
0.34  
0.23  
0.37  
0.21  
0.31  
0.39  
0.31  
0.29  
0.33  
0.35  
0.3  
0.28  
0.4  
0.19  
0.3  
0.39  
0.36  
0.4  
0.38  
0.25  
0.28  
0.39  
0.31  
0.33  
0.4  
0.39  
0.4

0.3  
0.29  
0.27  
0.34  
0.21  
0.37  
0.03  
0.29  
0.3  
0.31  
0.25  
0.27  
0.32  
0.3  
0.34  
0.19  
0.1  
0.3  
0.28  
0.23  
0.4  
0.39  
0.39  
0.4  
0.37  
0.21  
0.17  
0.19  
0.18  
0.23  
0.22  
0.26  
0.29  
0.13  
0.2  
0.16  
0.38  
0.33  
0.39  
0.4  
0.33  
0.37  
0.4  
0.34  
0.37  
0.27  
0.22  
0.39  
0.35  
0.4  
0.14  
0.18  
0.4

0.25  
0.25  
0.4  
0.38  
0.36  
0.26  
0.25  
0.23  
0.29  
0.12  
0.4  
0.27  
0.4  
0.38  
0.29  
0.32  
0.12  
0.37  
0.4  
0.37  
0.2  
0.4  
0.32  
0.18  
0.23  
0.39  
0.35  
0.36  
0.38  
0.38  
0.38  
0.39  
0.33  
0.28  
0.39  
0.33  
0.27  
0.14  
0.34  
0.38  
0.39  
0.38  
0.32  
0.4  
0.39  
0.38  
0.17  
0.21  
0.34  
0.35  
0.36  
0.27  
0.22

0.34  
0.36  
0.38  
0.23  
0.22  
0.38  
0  
0.38  
0.39  
0.39  
0.21  
0.33  
0.38  
0.38  
0.38  
0.4  
0.4  
0.34  
0.36  
0.35  
0.39  
0.38  
0.26  
0.34  
0.17  
0.26  
0.31  
0.14  
0.12  
0.13  
0.07  
0.18  
0.31  
0.38  
0.4  
0.35  
0.38  
0.38  
0.29  
0.16  
0.37  
0.36  
0.4  
0.26  
0.25  
0.33  
0.39  
0.22  
0.36  
0.38  
0.36  
0.4  
0.37



0.33  
0.35  
0.26  
0.22  
0.39  
0.35  
0.14  
0.14  
0.34  
0.36  
0.06  
0.35  
0.37  
0.4  
0.18  
0.18  
0.32  
0.31  
0.38  
0.23  
0.11  
0.32  
0.13  
0.36  
0.35  
0.4  
0.2  
0.37  
0.29  
0.4  
0.12  
0.33  
0.4  
0.33  
0.39  
0.38  
0.22  
0.32  
0.39  
0.27  
0.38  
0.32  
0.23  
0.37  
0.2  
0.36  
0.4  
0.4  
0.39  
0.37  
0.31  
0.35  
0.39

0.4  
0.4  
0.21  
0.34  
0.4  
0.39  
0.4  
0.4  
0.35  
0.3  
0.37  
0.38  
0.22  
0.36  
0.29  
0.4  
0.27  
0.12  
0.4  
0.33  
0.26  
0.39  
0.17  
0.38  
0.14  
0.19  
0.38  
0.19  
0.36  
0.26  
0.35  
0.24  
0.36  
0.38  
0.28  
0.38  
0.15  
0.16  
0.39  
0.14  
0.4  
0.4  
0.38  
0.4  
0.39  
0.37  
0.38  
0  
0.37  
0.4  
0.39  
0.25  
0.26

0.23  
0.4  
0.33  
0.27  
0.35  
0.34  
0.29  
0.35  
0.38  
0.18  
0.37  
0.33  
0.4  
0.4  
0.4  
0.4  
0.4  
0.37  
0.38  
0.4  
0.37  
0.36  
0.36  
0.31  
0.22  
0.4  
0.16  
0.35  
0.37  
0.31  
0.25  
0.27  
0.31  
0.34  
0.19  
0.26  
0.33  
0.07  
0.29  
0.29  
0.39  
0.29  
0.37  
0.4  
0.4  
0.22  
0.08  
0.37  
0.21  
0.28  
0.28  
0.22  
0.27

0.32  
0.39  
0.32  
0.35  
0.29  
0.23  
0.4  
0.35  
0.39  
0.35  
0.38  
0.4  
0.35  
0.24  
0.25  
0.39  
0.4  
0.37  
0.36  
0.23  
0.26  
0.07  
0.34  
0.4  
0.39  
0.4  
0.16  
0.39  
0.32  
0.15  
0.29  
0.38  
0.35  
0.21  
0.21  
0.19  
0.28  
0.39  
0.33  
0.39  
0.28  
0.33  
0.38  
0.38  
0.38  
0.37  
0.28  
0.24  
0.27  
0.14  
0.37  
0.4  
0.32

0.25  
0.18  
0.19  
0.4  
0.39  
0.05  
0.34  
0.39  
0.29  
0.33  
0.12  
0.3  
0.4  
0.37  
0.35  
0.35  
0.25  
0.29  
0.17  
0.38  
0.23  
0.3  
0.27  
0.38  
0.38  
0.37  
0.16  
0.19  
0.24  
0.4  
0.38  
0.4  
0.26  
0.38  
0.4  
0.22  
0.28  
0.17  
0.23  
0.4  
0.33  
0.38  
0.39  
0.37  
0.33  
0.36  
0.26  
0.35  
0.31  
0.37  
0.22  
0.21  
0.26

0.38  
0.21  
0.39  
0.39  
0.14  
0.4  
0.23  
0.24  
0.3  
0.31  
0.22  
0.22  
0.4  
0.39  
0.4  
0.36  
0.34  
0.39  
0.28  
0.35  
0.3  
0.26  
0.34  
0.37  
0.2  
0.32  
0.38  
0.36  
0.37  
0.36  
0.37  
0.39  
0.38  
0.38  
0.3  
0.39  
0.38  
0.17  
0.35  
0.21  
0.38  
0.39  
0.37  
0.37  
0.39  
0.34  
0.15  
0.38  
0.21  
0.39  
0.37  
0.26  
0.1

0.39  
0.14  
0.34  
0.36  
0.4  
0.3  
0.09  
0.08  
0.17  
0.12  
0.12  
0.23  
0.21  
0.15  
0.33  
0.35  
0.27  
0.13  
0.38  
0.1  
0.39  
0.35  
0.05  
0.19  
0.19  
0.29  
0.31  
0.37  
0.39  
0.39  
0.3  
0.29  
0.14  
0.28  
0.24  
0.29  
0.28  
0.35  
0.35  
0.36  
0.4  
0.39  
0.27  
0.38  
0.34  
0.29  
0.36  
0.4  
0.14  
0.18  
0.26  
0.37  
0.33

0.38  
0.28  
0.33  
0.19  
0.37  
0.19  
0.17  
0.4  
0.32  
0.16  
0.21  
0.34  
0.22  
0.16  
0.37  
0.18  
0.31  
0.4  
0.3  
0.27  
0.13  
0.2  
0.14  
0.36  
0.25  
0.37  
0.38  
0.05  
0.12  
0.38  
0.36  
0.39  
0.33  
0.4  
0.39  
0.14  
0.31  
0.31  
0.37  
0.37  
0.31  
0.24  
0.36  
0.16  
0.38  
0.36  
0.38  
0.13  
0.26  
0.31  
0.32  
0.2  
0.14



0.26  
0.26  
0.17  
0.38  
0.36  
0.36  
0.35  
0.36  
0.21  
0.17  
0.38  
0.29  
0.33  
0.24  
0.38  
0.31  
0.33  
0.33  
0.33  
0.38  
0.36  
0.34  
0.17  
0.23  
0.39  
0.4  
0.23  
0.23  
0.33  
0.39  
0.4  
0.36  
0.34  
0.38  
0.39  
0.4  
0.18  
0.12  
0.37  
0.3  
0.17  
0.39  
0.38  
0.32  
0.23  
0.28  
0.2  
0.32  
0.12  
0.22  
0.33  
0.12  
0.21

0.36  
0.34  
0.23  
0.3  
0.38  
0.39  
0.4  
0.16  
0.31  
0.12  
0.4  
0.19  
0.4  
0.24  
0.4  
0.36  
0.35  
0.33  
0.23  
0.2  
0.35  
0.27  
0.24  
0.27  
0.38  
0.07  
0.1  
0.19  
0.24  
0.39  
0.24  
0.35  
0.27  
0.11  
0.07  
0.04  
0.12  
0.1  
0.28  
0.39  
0.11  
0.37  
0.39  
0.37  
0.32  
0.09  
0.11  
0.32  
0.18  
0.36  
0.38  
0.31  
0.4

0.34  
0.31  
0.4  
0.33  
0.31  
0.39  
0.18  
0.32  
0.37  
0.4  
0.39  
0.37  
0.22  
0.3  
0.37  
0.13  
0.28  
0.36  
0.35  
0.3  
0.36  
0.16  
0.24  
0.38  
0.34  
0.12  
0.39  
0.29  
0.13  
0.22  
0.32  
0.23  
0.34  
0.3  
0.35  
0.19  
0.3  
0.25  
0.25  
0.26  
0.3  
0.15  
0.38  
0.21  
0.34  
0.37  
0.25  
0.11  
0.31  
0.19  
0.28  
0.33  
0.24

0.14  
0.38  
0.39  
0.35  
0.35  
0.34  
0.4  
0.35  
0.36  
0.38  
0.18  
0.19  
0.36  
0.3  
0.38  
0.38  
0.4  
0.21  
0.3  
0.24  
0.36  
0.2  
0.36  
0.3  
0.35  
0.35  
0.36  
0.36  
0.24  
0.3  
0.38  
0.39  
0.38  
0  
0.25  
0.39  
0.39  
0.18  
0.26  
0.39  
0.39  
0.39  
0.32  
0.26  
0.38  
0  
0.33  
0.4  
0.31  
0.39  
0.32  
0.4  
0.32

0.38  
0.4  
0.36  
0.37  
0.12  
0.28  
0.21  
0.27  
0.14  
0.35  
0.31  
0.25  
0.4  
0.23  
0.37  
0.2  
0.38  
0.39  
0.39  
0.33  
0.35  
0.06  
0.37  
0.22  
0.39  
0.27  
0.19  
0.4  
0.27  
0.21  
0.16  
0.17  
0.3  
0.18  
0.35  
0.38  
0.38  
0.32  
0.07  
0.27  
0.24  
0.11  
0.12  
0.23  
0.35  
0.14  
0.37  
0.24  
0.39  
0.4  
0.34  
0.37  
0.36

0.35  
0.29  
0.4  
0.25  
0.27  
0.35  
0.4  
0.39  
0.35  
0.32  
0.34  
0.37  
0.32  
0.39  
0.11  
0.18  
0.38  
0.39  
0.34  
0.32  
0.3  
0.19  
0.38  
0.35  
0.09  
0.12  
0.2  
0.22  
0.14  
0.08  
0.14  
0.34  
0.23  
0.18  
0.26  
0.28  
0.12  
0.29  
0.31  
0.27  
0.25  
0.2  
0.18  
0.24  
0.38  
0.16  
0.35  
0.4  
0.34  
0.33  
0.28  
0.25  
0.26

0.21  
0.32  
0.4  
0.23  
0.22  
0.32  
0.1  
0.36  
0.36  
0.4  
0.24  
0.29  
0.28  
0.4  
0.4  
0.33  
0.2  
0.31  
0.29  
0.39  
0.39  
0.32  
0.06  
0.4  
0.35  
0.39  
0.29  
0.38  
0.26  
0.37  
0.39  
0.38  
0.35  
0.26  
0.32  
0.15  
0.2  
0.27  
0.3  
0.4  
0.4  
0.4  
0.29  
0.3  
0.38  
0.33  
0.39  
0.39  
0.35  
0.4  
0.36  
0.36  
0.4

0.39  
0.4  
0.35  
0.2  
0.34  
0.35  
0.21  
0.17  
0.36  
0.37  
0.24  
0.25  
0.37  
0.39  
0.38  
0.23  
0.38  
0.4  
0.27  
0.4  
0.34  
0.32  
0.33  
0.21  
0.17  
0.36  
0.26  
0.33  
0.36  
0.35  
0.39  
0.2  
0.05  
0  
0.19  
0.39  
0.2  
0.39  
0.33  
0.11  
0.36  
0.38  
0.16  
0.24  
0.28  
0.37  
0.29  
0.4  
0.3  
0.39  
0.32  
0.4  
0.35



0.29  
0.35  
0.26  
0.3  
0.3  
0.3  
0.25  
0.21  
0.37  
0.37  
0.18  
0.25  
0.32  
0.3  
0.11  
0.2  
0.17  
0.19  
0.38  
0.27  
0.33  
0.14  
0.15  
0.11  
0.33  
0.31  
0.37  
0.34  
0.17  
0.25  
0.16  
0.35  
0.12  
0.3  
0.09  
0.29  
0.38  
0.39  
0.39  
0.35  
0.2  
0.37  
0.37  
0.37  
0.3  
0.4  
0.36  
0.35  
0.38  
0.4  
0.28  
0.39  
0.4

0.39  
0.39  
0.12  
0.38  
0.37  
0.33  
0.34  
0.33  
0.33  
0.4  
0.34  
0.2  
0.32  
0.4  
0.32  
0.39  
0.39  
0.35  
0.29  
0.4  
0.38  
0.27  
0.33  
0.33  
0.29  
0.06  
0.22  
0.27  
0.28  
0.4  
0.37  
0.23  
0.28  
0.39  
0.39  
0.16  
0.19  
0.22  
0.38  
0.39  
0.34  
0.29  
0.35  
0.3  
0.4  
0.36  
0.38  
0.31  
0.27  
0.23  
0.24  
0.37  
0.4

0.34  
0.38  
0.4  
0.3  
0.26  
0.38  
0.4  
0.35  
0.32  
0.4  
0.38  
0.36  
0.38  
0.35  
0.39  
0.06  
0.29  
0.37  
0.32  
0.15  
0.14  
0.11  
0.25  
0.39  
0.38  
0.39  
0.36  
0.17  
0.4  
0.31  
0.31  
0.33  
0.28  
0.4  
0.23  
0.31  
0.13  
0.29  
0.39  
0.14  
0.18  
0.31  
0.36  
0.36  
0.4  
0.14  
0.4  
0.38  
0.4  
0.25  
0.4  
0.33  
0.39

0.31  
0.38  
0.37  
0.39  
0.4  
0.2  
0.16  
0.39  
0.35  
0.19  
0.4  
0.4  
0.27  
0.3  
0.09  
0.1  
0.36  
0.27  
0.37  
0.38  
0.39  
0.3  
0.28  
0.22  
0.39  
0.36  
0.35  
0.16  
0.32  
0.36  
0.15  
0.2  
0.39  
0.38  
0.33  
0.35  
0.34  
0.33  
0.08  
0.35  
0.15  
0.23  
0.31  
0.2  
0.36  
0.39  
0.35  
0.2  
0.06  
0.27  
0.31  
0.25  
0.33

0.4  
0.26  
0.36  
0.28  
0.4  
0.39  
0.24  
0.32  
0.37  
0.26  
0.12  
0.07  
0.37  
0.28  
0.12  
0.4  
0.26  
0.35  
0.25  
0.39  
0.35  
0.17  
0.33  
0.4  
0.36  
0.39  
0.2  
0.33  
0.09  
0.4  
0.38  
0.28  
0.37  
0.4  
0.4  
0.19  
0.16  
0.26  
0.15  
0.29  
0.31  
0.2  
0.39  
0.12  
0.25  
0.4  
0.38  
0.39  
0.4  
0.16  
0.23  
0.29  
0.38

0.3  
0.24  
0.25  
0.09  
0.29  
0.15  
0.35  
0.24  
0.39  
0.25  
0.4  
0.37  
0.35  
0.25  
0.38  
0.38  
0.36  
0.15  
0.35  
0.23  
0.29  
0.19  
0.33  
0.23  
0.27  
0.33  
0.34  
0.28  
0.23  
0.26  
0.38  
0.4  
0.36  
0.2  
0.31  
0.39  
0.31  
0.39  
0.39  
0.26  
0.4  
0.39  
0.4  
0.3  
0.39  
0.38  
0.35  
0.39  
0.4  
0.38  
0.38  
0.26  
0.18

0.16  
0.39  
0.37  
0.34  
0.07  
0.37  
0.34  
0.23  
0.38  
0.31  
0.4  
0.28  
0.39  
0.39  
0.37  
0.34  
0.4  
0.4  
0.39  
0.36  
0.38  
0.38  
0.39  
0.35  
0.4  
0.4  
0.34  
0.4  
0.4  
0.2  
0.39  
0.35  
0.14  
0.4  
0.33  
0.35  
0.25  
0.35  
0.36  
0.34  
0.4  
0.32  
0.39  
0.25  
0.21  
0.32  
0.4  
0.18  
0.27  
0.33  
0.13  
0.32  
0.17

0.28  
0.26  
0.36  
0.31  
0.4  
0.34  
0.35  
0.3  
0.34  
0.36  
0.31  
0.37  
0.08  
0.16  
0.27  
0.18  
0.26  
0.4  
0.33  
0.27  
0.4  
0.38  
0.31  
0.32  
0.4  
0.11  
0.36  
0.16  
0.08  
0.37  
0.36  
0.17  
0.18  
0.38  
0.21  
0.34  
0.2  
0.35  
0.36  
0.33  
0.39  
0.3  
0.17  
0.22  
0.35  
0.3  
0.37  
0.39  
0.37  
0.4  
0.14  
0.26  
0.29



0.4  
0.33  
0.14  
0.23  
0.33  
0.38  
0.29  
0.33  
0.4  
0.37  
0.13  
0.19  
0.39  
0.31  
0.38  
0.35  
0.17  
0.29  
0.2  
0.24  
0.28  
0.36  
0.4  
0.3  
0.35  
0.16  
0.23  
0.38  
0.34  
0.37  
0.39  
0.35  
0.39  
0.39  
0.16  
0.39  
0.18  
0.27  
0.17  
0.34  
0.37  
0.39  
0.33  
0.28  
0.29  
0.07  
0.28  
0.38  
0.31  
0.35  
0.33  
0.29  
0.18

0.37  
0.29  
0.4  
0.4  
0.37  
0.27  
0.2  
0.04  
0.3  
0.2  
0.4  
0.32  
0.37  
0.35  
0.14  
0.24  
0.38  
0.37  
0.29  
0.4  
0.35  
0.35  
0.39  
0.32  
0.28  
0.4  
0.36  
0.4  
0.4  
0.4  
0.4  
0.39  
0.39  
0.34  
0.14  
0.07  
0.24  
0.18  
0.29  
0.39  
0.34  
0.39  
0.39  
0.37  
0.18  
0.15  
0.05  
0.35  
0.2  
0.31  
0.4  
0.37  
0.22

0.32  
0.39  
0.19  
0.39  
0.39  
0.38  
0.36  
0.39  
0.35  
0.4  
0.19  
0.08  
0.16  
0.18  
0.21  
0.4  
0.32  
0.18  
0.3  
0.13  
0.37  
0.23  
0.19  
0.27  
0.35  
0.33  
0.36  
0.38  
0.27  
0.33  
0.17  
0.37  
0.14  
0.15  
0.27  
0.34  
0.32  
0.29  
0.38  
0.28  
0.31  
0.21  
0.19  
0.14  
0.24  
0.4  
0.3  
0.37  
0.38  
0.19  
0.31  
0.23  
0.29

0.39  
0.15  
0.17  
0.35  
0.35  
0.33  
0.08  
0.36  
0.37  
0.31  
0.36  
0.31  
0.35  
0.4  
0.28  
0.38  
0.05  
0.19  
0.32  
0.17  
0.22  
0.39  
0.22  
0.17  
0.37  
0.21  
0.34  
0.36  
0.23  
0.14  
0.4  
0.38  
0.19  
0.4  
0.36  
0.39  
0.2  
0.38  
0.32  
0.19  
0.38  
0.4  
0.38  
0.39  
0.38  
0.3  
0.3  
0.38  
0.39  
0.21  
0.21  
0.32  
0.38

0.39  
0.39  
0.39  
0.37  
0.37  
0.4  
0.25  
0.38  
0.13  
0.37  
0.14  
0.35  
0.39  
0.24  
0.4  
0.33  
0.4  
0.35  
0.39  
0.37  
0.29  
0.4  
0.35  
0.34  
0.3  
0.4  
0.38  
0.31  
0.29  
0.4  
0.36  
0.31  
0.29  
0.27  
0.4  
0.37  
0.4  
0.38  
0.16  
0.38  
0.24  
0.27  
0.39  
0.37  
0.3  
0.4  
0.36  
0.38  
0.36  
0.38  
0.38  
0.36  
0.4

0.38  
0.22  
0.4  
0.39  
0.4  
0.31  
0.38  
0.33  
0.28  
0.33  
0.39  
0.24  
0.22  
0.26  
0.29  
0.35  
0.32  
0.35  
0.39  
0.26  
0.25  
0.27  
0.36  
0.39  
0.37  
0.23  
0.35  
0.26  
0.22  
0.4  
0.19  
0.39  
0.21  
0.39  
0.4  
0.3  
0.4  
0.38  
0.4  
0.29  
0.18  
0.4  
0.35  
0.39  
0.34  
0.39  
0.4  
0.27  
0.13  
0.17  
0.38  
0.39  
0.33

0.32  
0.36  
0.28  
0.27  
0.27  
0.26  
0.24  
0.36  
0.38  
0.39  
0.38  
0.27  
0.32  
0.22  
0.35  
0.37  
0.39  
0.38  
0.38  
0.37  
0.37  
0.29  
0.38  
0.26  
0.37  
0.28  
0.36  
0.26  
0.34  
0.26  
0.21  
0.3  
0.33  
0.27  
0.21  
0.14  
0.18  
0.27  
0.4  
0.3  
0.4  
0.14  
0.4  
0.16  
0.23  
0.32  
0.39  
0.08  
0.14  
0.16  
0.18  
0.27  
0.4

0.15  
0.19  
0.29  
0.29  
0.17  
0.37  
0.27  
0.38  
0.4  
0.32  
0.28  
0.32  
0.14  
0.2  
0.33  
0.33  
0.32  
0.31  
0.33  
0.37  
0.31  
0.25  
0.18  
0.39  
0.3  
0.2  
0.3  
0.29  
0.31  
0.32  
0.36  
0.29  
0.37  
0.39  
0.38  
0.37  
0.28  
0.32  
0.2  
0.27  
0.14  
0.39  
0.18  
0.3  
0.39  
0.39  
0.19  
0.15  
0.3  
0.24  
0.18  
0.27  
0.35



0.22  
0.36  
0.33  
0.17  
0.29  
0.29  
0.36  
0.4  
0.3  
0.21  
0.37  
0.38  
0.39  
0.32  
0.38  
0.37  
0.38  
0.34  
0.36  
0.27  
0.16  
0.32  
0.27  
0.31  
0.19  
0.4  
0.34  
0.21  
0.26  
0.2  
0.14  
0.39  
0.25  
0.34  
0.38  
0.4  
0.25  
0.21  
0.14  
0.21  
0.2  
0.38  
0.4  
0.39  
0.21  
0.28  
0.38  
0.17  
0.34  
0.29  
0.31  
0.29  
0.38

0.15  
0.4  
0.29  
0.18  
0.27  
0.4  
0.38  
0.39  
0.38  
0.2  
0.3  
0.25  
0.18  
0.37  
0.39  
0.38  
0.24  
0.16  
0.39  
0.27  
0.25  
0.2  
0.26  
0.29  
0.38  
0.4  
0.18  
0.34  
0.28  
0.21  
0.2  
0.38  
0.38  
0.27  
0.27  
0.33  
0.27  
0.39  
0.36  
0.4  
0.38  
0.34  
0.26  
0.38  
0.17  
0.3  
0.36  
0.36  
0.12  
0.28  
0.29  
0.14  
0.33

0.39  
0.27  
0.37  
0.4  
0.38  
0.3  
0.36  
0.29  
0.39  
0.24  
0.38  
0.21  
0.33  
0.29  
0.4  
0.29  
0.17  
0.28  
0.29  
0.36  
0.3  
0.37  
0.39  
0.39  
0.34  
0.3  
0.28  
0.36  
0.06  
0.32  
0.38  
0.37  
0.35  
0.32  
0.3  
0.4  
0.37  
0.35  
0.26  
0.36  
0.37  
0.4  
0.32  
0.39  
0.28  
0.34  
0.33  
0.31  
0.32  
0.2  
0.14  
0.4  
0.4

0.16  
0.23  
0.3  
0.38  
0.37  
0.34  
0.35  
0.4  
0.26  
0.38  
0.31  
0.37  
0.39  
0.31  
0.25  
0.16  
0.39  
0.39  
0.34  
0.4  
0.31  
0.23  
0.19  
0.32  
0.4  
0.19  
0.25  
0.32  
0.32  
0.29  
0.25  
0.4  
0.28  
0.17  
0.17  
0.23  
0.16  
0.09  
0.32  
0.13  
0.32  
0.4  
0.39  
0.15  
0.18  
0.4  
0.28  
0.35  
0.34  
0.11  
0.33  
0.34  
0.19

0.16  
0.2  
0.38  
0.39  
0.39  
0.35  
0.38  
0.31  
0.23  
0.39  
0.4  
0.37  
0.4  
0.29  
0.13  
0.14  
0.09  
0.29  
0.14  
0.17  
0.13  
0.37  
0.36  
0.39  
0.32  
0.29  
0.18  
0.36  
0.37  
0.33  
0.14  
0.16  
0.33  
0.37  
0.34  
0.32  
0.35  
0.39  
0.22  
0.29  
0.39  
0.38  
0.4  
0.39  
0.26  
0.37  
0.37  
0.22  
0.19  
0.25  
0.38  
0.35  
0.22

0.24  
0.38  
0.32  
0.28  
0.32  
0.39  
0.34  
0.35  
0.2  
0.38  
0.4  
0.24  
0.4  
0.4  
0.37  
0.29  
0.29  
0.39  
0.29  
0.16  
0.1  
0.4  
0.37  
0.33  
0.39  
0.35  
0.26  
0.39  
0.31  
0.32  
0.38  
0.31  
0.11  
0.4  
0.17  
0.12  
0.19  
0.39  
0.22  
0.37  
0.21  
0.4  
0.34  
0.16  
0.4  
0.15  
0.32  
0.02  
0.38  
0.32  
0.32  
0.33  
0.23

0.39  
0.4  
0.25  
0.03  
0.22  
0.31  
0.34  
0.94  
0.35  
0.17  
0.39  
0.26  
0.14  
0.39  
0.31  
0.33  
0.26  
0.18  
0.19  
0.4  
0.32  
0.35  
0.24  
0.36  
0.23  
0.38  
0.05  
0.4  
0.12  
0.22  
0.08  
0.19  
0.4  
0.4  
0.17  
0.17  
0.26  
0.28  
0.37  
0.18  
0.09  
0.37  
0.16  
0.33  
0.26  
0.38  
0.4  
0.39  
0.4  
0.35  
0.34  
0.21  
0.34

0.25  
1  
0.2  
0.25  
0.2  
0.11  
0.35  
0.36  
0.25  
0.19  
0.21  
0.32  
0.39  
0.39  
0.34  
0.36  
0.37  
0.24  
0.18  
0.03  
0.39  
0.07  
0.16  
0.33  
0.23  
0.2  
0.4  
0.4  
0.22  
0.19  
0.23  
0.39  
0.4  
0.34  
0.19  
0.17  
0.25  
0.17  
0.19  
0.26  
0.37  
0.35  
0.34  
0.38  
0.26  
0.3  
0.37  
0.34  
0.27  
0.32  
0.27  
0.35  
0.33



0.37  
0.31  
0.39  
0.37  
0.37  
0.24  
0.27  
0.38  
0.39  
0.33  
0.38  
0.24  
0.2  
0.34  
0.36  
0.22  
0.28  
0.2  
0.38  
0.35  
0.21  
0.4  
0.33  
0.24  
0.35  
0.38  
0.32  
0.36  
0.38  
0.27  
0.4  
0.37  
0.21  
0.24  
0.23  
0.36  
0.24  
0.4  
0.25  
0.28  
0.12  
0.38  
0.33  
0.36  
0.35  
0.4  
0.36  
0.36  
0.36  
0.35  
0.18  
0.17  
0.2

0.35  
0.32  
0  
0.17  
0.35  
0.29  
0.37  
0.15  
0.13  
0.28  
0.35  
0.27  
0.38  
0.23  
0.16  
0.26  
0.39  
0.39  
0.4  
0.4  
0.24  
0.35  
0.31  
0.26  
0.23  
0.13  
0.11  
0.18  
0.19  
0.38  
0.35  
0.29  
0.39  
0.2  
0.13  
0.29  
0.37  
0.28  
0.4  
0.38  
0.31  
0.4  
0.3  
0.37  
0.36  
0.38  
0.39  
0.38  
0.39  
0.4  
0.19  
0.28  
0.32

0.37  
0.17  
0.26  
0.39  
0.22  
0.26  
0.38  
0.37  
0.38  
0.36  
0.32  
0.38  
0.4  
0.31  
0.38  
0.37  
0.37  
0.31  
0.16  
0.2  
0.26  
0.4  
0.36  
0.39  
0.33  
0.3  
0.23  
0.36  
0.25  
0.16  
0.13  
0.16  
0.19  
0.24  
0.39  
0.35  
0.37  
0.32  
0.21  
0.29  
0.17  
0.13  
0.15  
0.12  
0.28  
0.33  
0.36  
0.13  
0.23  
0.21  
0.27  
0.39  
0.36

0.37  
0.4  
0.34  
0.25  
0.38  
0.12  
0.33  
0.25  
0.37  
0.29  
0.2  
0.34  
0.31  
0.19  
0.14  
0.09  
0.2  
0.24  
0.36  
0.24  
0.32  
0.39  
0.39  
0.33  
0.23  
0.23  
0.37  
0.38  
0.33  
0.3  
0.4  
0.4  
0.34  
0.39  
0.2  
0.12  
0.11  
0.37  
0.37  
0.39  
0.26  
0.12  
0.39  
0.36  
0.37  
0.35  
0.21  
0.19  
0.27  
0.36  
0.12  
0.07  
0.35

0.38  
0.19  
0.14  
0.32  
0.32  
0.35  
0.4  
0.18  
0.26  
0.19  
0.23  
0.19  
0.32  
0.39  
0.35  
0.29  
0.37  
0.39  
0.24  
0.39  
0.16  
0.17  
0.36  
0.4  
0.4  
0.4  
0.36  
0.27  
0.21  
0.36  
0.23  
0.4  
0.11  
0.28  
0.4  
0.4  
0.4  
0.38  
0.32  
0.39  
0.35  
0.33  
0.4  
0.06  
0.39  
0.4  
0.33  
0.4  
0.38  
0.4  
0.14  
0.37  
0.39

0.4  
0.3  
0.39  
0.4  
0.37  
0.19  
0.33  
0.17  
0.33  
0.3  
0.33  
0.19  
0.39  
0.39  
0.4  
0.37  
0.39  
0.39  
0.4  
0.38  
0.22  
0.38  
0.37  
0.4  
0.28  
0.36  
0.2  
0.37  
0.39  
0.4  
0.36  
0.39  
0.36  
0.38  
0.13  
0.27  
0.29  
0.29  
0.38  
0.3  
0.2  
0.14  
0.19  
0.4  
0.24  
0.15  
0.22  
0.39  
0.39  
0.24  
0.39  
0.25  
0.29

0.4  
0.35  
0.38  
0.35  
0.4  
0.4  
0.35  
0.3  
0.39  
0.4  
0.14  
0.14  
0.13  
0.39  
0.39  
0.37  
0.36  
0.29  
0.32  
0.38  
0.21  
0.3  
0.4  
0.38  
0.03  
0.3  
0.33  
0.27  
0.3  
0.39  
0.25  
0.26  
0.28  
0.36  
0.33  
0.26  
0.39  
0.39  
0.35  
0.34  
0.38  
0.34  
0.37  
0.39  
0.12  
0.28  
0.17  
0.26  
0.19  
0.27  
0.38  
0.37  
0.24

0.4  
0.3  
0.26  
0.37  
0  
0.33  
0.25  
0.26  
0.39  
0.33  
0.34  
0.31  
0.33  
0.34  
0.29  
0.37  
0.3  
0.32  
0.31  
0.39  
0.39  
0.2  
0.36  
0.33  
0.31  
0.36  
0.33  
0.39  
0.38  
0.28  
0.4  
0.4  
0.39  
0.4  
0.4  
0.34  
0.4  
0.24  
0.35  
0.32  
0.38  
0.34  
0.4  
0.38  
0.33  
0.37  
0.38  
0.21  
0.21  
0.31  
0.32  
0.21  
0.4



0.36  
0.4  
0.4  
0.4  
0.4  
0.31  
0.36  
0.36  
0.28  
0.14  
0.38  
0.2  
0.26  
0.39  
0.14  
0.39  
0.3  
0.14  
0.35  
0.33  
0.18  
0.37  
0.37  
0.3  
0.31  
0.35  
0.4  
0.28  
0.18  
0.25  
0.39  
0.33  
0.4  
0.18  
0.16  
0.2  
0.39  
0.37  
0.4  
0.4  
0.4  
0.31  
0.35  
0.25  
0.32  
0.36  
0.34  
0.3  
0.4  
0.91  
0.33  
0.37  
0.38

0.23  
0.39  
0.36  
0.4  
0.39  
0.24  
0.29  
0.26  
0.34  
0.38  
1  
0.31  
0.15  
0.26  
0.26  
0.33  
0.28  
0.33  
0.32  
0.22  
0.24  
0.4  
0.4  
0.4  
0.21  
0.33  
0.4  
0.27  
0.3  
0.34  
0.38  
0.32  
0.3  
0.4  
0.4  
0.39  
0.19  
0.29  
0.2  
0.23  
0.35  
0.36  
0.26  
0.33  
0.34  
0.28  
0.35  
0  
0.38  
0.4  
0.25  
0.31  
0.08

0.15  
0.34  
0.28  
0.12  
0.24  
0  
0.27  
0.4  
0.09  
0.12  
0.21  
0.3  
0.33  
0.25  
0.21  
0.4  
0.38  
0.38  
0.22  
0.3  
0.34  
0.28  
0.14  
0.21  
0.38  
0.25  
0.23  
0.26  
0.23  
0.24  
0.09  
0.07  
0.3  
0.3  
0.34  
0.23  
0.27  
0.39  
0.22  
0.23  
0.18  
0.27  
0.16  
0.11  
0.16  
0.4  
0.36  
0.17  
0.39  
0.31  
0.1  
0.4  
0.24

0.21  
0.32  
0.36  
0.33  
0.17  
0.36  
0.36  
0.4  
0.11  
0.28  
0.23  
0.39  
0.25  
0.39  
0.36  
0.31  
0.36  
0.34  
0.25  
0.38  
0.25  
0.2  
0.16  
0.4  
0.4  
0.32  
0.14  
0.28  
0.4  
0.36  
0.4  
0.22  
0.27  
0.29  
0.36  
0.25  
0.35  
0.14  
0.36  
0.38  
0.4  
0.39  
0.31  
0.4  
0.35  
0.33  
0.35  
0.4  
0.33  
0.39  
0.34  
0.18  
0.25

0.4  
0.33  
0.32  
0.4  
0.28  
0.37  
0.36  
0.33  
0.36  
0.32  
0.38  
0.36  
0.26  
0.29  
0.31  
0.39  
0.3  
0.39  
0.32  
0.4  
0.4  
0.38  
0.39  
0.34  
0.37  
0.35  
0.38  
0.37  
0.35  
0.26  
0.14  
0.16  
0.15  
0.28  
0.32  
0.26  
0.27  
0  
0.19  
0.33  
0.28  
0.16  
0.09  
0.32  
0.38  
0.36  
0.38  
0.34  
0.27  
0.33  
0.31  
0.37  
0.38

0.4  
0.39  
0.23  
0.4  
0.38  
0.36  
0.15  
0.29  
0.4  
0.39  
0.25  
0.39  
0.33  
0.37  
0.38  
0.4  
0.33  
0.34  
0.35  
0.25  
0.32  
0.39  
0.38  
0.24  
0.39  
0.3  
0.24  
0.4  
0.32  
0.22  
0.16  
0.4  
0.39  
0.18  
0.17  
0.31  
0.39  
0.4  
0.35  
0.32  
0.36  
0.34  
0.14  
0.38  
0.39  
0.09  
0.4  
0.27  
0.39  
0.26  
0.4  
0.4  
0.4

0.39  
0.37  
0.23  
0.23  
0.26  
0.39  
0.39  
0.4  
0.38  
0.39  
0.35  
0.32  
0.14  
0.32  
0.38  
0.24  
0.17  
0.32  
0.35  
0.38  
0.29  
0.38  
0.36  
0.34  
0.22  
0.17  
0.35  
0.24  
0.39  
0.38  
0.36  
0.37  
0.39  
0.4  
0.38  
0.36  
0.17  
0.23  
0.23  
0.3  
0.35  
0.16  
0.12  
0.25  
0.23  
0.38  
0.3  
0.33  
0.35  
0.37  
0.06  
0.25  
0.24

0.2  
0.24  
0.35  
0.36  
0.27  
0.37  
0.3  
0.33  
0.31  
0.18  
0.31  
0.39  
0.36  
0.38  
0.3  
0.32  
0.38  
0.38  
0.35  
0.37  
0.26  
0.26  
0.38  
0.38  
0.24  
0.4  
0.34  
0.34  
0.29  
0.33  
0.38  
0.39  
0.24  
0.23  
0.27  
0.39  
0.36  
0.36  
0.35  
0.38  
0.39  
0.35  
0.4  
0.06  
0.12  
0.31  
0.25  
0.35  
0.38  
0.37  
0.24  
0.1  
0.15



0.26  
0.32  
0.33  
0.37  
0.32  
0.4  
0.15  
0.38  
0.38  
0.39  
0.38  
0.29  
0.14  
0.32  
0.32  
0.25  
0.25  
0.16  
0.26  
0.35  
0.39  
0.15  
0.19  
0.4  
0.31  
0.4  
0.35  
0.28  
0.12  
0.2  
0.18  
0.36  
0.15  
0.39  
0.16  
0.34  
0.38  
0.39  
0.34  
0.08  
0.32  
0.38  
0.23  
0.17  
0.19  
0.22  
0.17  
0.07  
0.14  
0.39  
0.27  
0.29  
0.21

0.34  
0.27  
0.3  
0.38  
0.4  
0.39  
0.39  
0.38  
0.31  
0.16  
0.33  
0.38  
0.4  
0.26  
0.08  
0.39  
0.26  
0.27  
0.21  
0.28  
0.31  
0.37  
0.36  
0.38  
0.22  
0.34  
0.38  
0.4  
0.37  
0.36  
0.13  
0.29  
0.29  
0.19  
0.05  
0.29  
0.4  
0.36  
0.34  
0.35  
0.36  
0.21  
0.17  
0.4  
0.38  
0.39  
0.4  
0.39  
0.31  
0.33  
0.31  
0.12  
0.21

0.25  
0.3  
0.14  
0.33  
0.36  
0.24  
0.32  
0.16  
0.39  
0.38  
0.38  
0.36  
0.18  
0.36  
0.26  
0.32  
0.36  
0.36  
0.29  
0.22  
0.25  
0.31  
0.4  
0.29  
0.4  
0.39  
0.24  
0.26  
0.23  
0.34  
0.33  
0.27  
0.22  
0.33  
0.37  
0.13  
0.4  
0.23  
0.4  
0.37  
0.4  
0.4  
0.36  
0.36  
0.37  
0.35  
0.38  
0.39  
0.39  
0.35  
0.39  
0.39  
0.37

0.36  
0.37  
0.39  
0.35  
0  
0.34  
0.4  
0.36  
0.27  
0.4  
0.4  
0.35  
0.36  
0.39  
0.36  
0.08  
0.4  
0.25  
0.39  
0.4  
0.4  
0.28  
0.31  
0.4  
0.24  
0.07  
0.38  
0.36  
0.39  
0.4  
0.4  
0.37  
0.4  
0.2  
0.38  
0.29  
0.28  
0.4  
0.37  
0.35  
0.39  
0.26  
0.39  
0.39  
0.33  
0.4  
0.27  
0.34  
0.36  
0.39  
0.39  
0.23  
0.39

0.33  
0.35  
0.38  
0.37  
0.4  
0.4  
0.35  
0.25  
0.38  
0.39  
0  
0.28  
0.26  
0.4  
0.38  
0.37  
0.21  
0.23  
0.31  
0.4  
0.39  
0.4  
0.4  
0.33  
0.35  
0.38  
0.4  
0.4  
0.35  
0.4  
0.23  
0.38  
0.38  
0.34  
0.37  
0.38  
0.36  
0.35  
0.39  
0.34  
0.14  
0.37  
0.4  
0.22  
0.37  
0.18  
0.14  
0.38  
0.39  
0.31  
0.35  
0.33  
0.34

0.38  
0.31  
0.38  
0.25  
0.32  
0.38  
0.39  
0.3  
0.4  
0.37  
0.4  
0.38  
0.24  
0.38  
0.4  
0.18  
0.17  
0.4  
0.17  
0.35  
0.16  
0.4  
0.27  
0.39  
0.37  
0.38  
0.39  
0.4  
0.4  
0.4  
0.4  
0.39  
0.35  
0.38  
0.39  
0.35  
0.39  
0.26  
0.1  
0.1  
0.08  
0.34  
0.38  
0.39  
0.36  
0.35  
0.16  
0.4  
0.15  
0.2  
0.39  
0.31  
0.23

0.12  
0.19  
0.26  
0.35  
0.4  
0.36  
0.24  
0.4  
0.2  
0.28  
0.21  
0.2  
0.31  
0.23  
0.4  
0.36  
0.36  
0.26  
0.11  
0.21  
0.31  
0.3  
0.34  
0.37  
0.37  
0.4  
0.4  
0.13  
0.21  
0.36  
0.4  
0.35  
0.28  
0.37  
0.38  
0.39  
0.39  
0.4  
0.36  
0.18  
0.2  
0.39  
0.11  
0.37  
0.39  
0.32  
0.39  
0.37  
0.31  
0.39  
0.38  
0.33  
0.21

0.4  
0.31  
0.16  
0.14  
0.16  
0.15  
0.33  
0.38  
0.37  
0.37  
0.39  
0.23  
0.4  
0.1  
0.26  
0.34  
0.25  
0.13  
0.32  
0.37  
0.28  
0.14  
0.4  
0.31  
0.24  
0.13  
0.34  
0.31  
0.33  
0.27  
0.37  
0.4  
0.13  
0.12  
0.15  
0.14  
0.17  
0.17  
0.38  
0.38  
0.39  
0.1  
0.33  
0.33  
0.28  
0.18  
0.38  
0.4  
0.3  
0.29  
0.26  
0.35  
0.32



0.15  
0.37  
0.36  
0.37  
0.39  
0.17  
0.08  
0.17  
0.31  
0.36  
0.2  
0.28  
0.29  
0.11  
0.36  
0.4  
0.37  
0.4  
0.3  
0.22  
0.11  
0.3  
0.35  
0.37  
0.29  
0.2  
0.31  
0.22  
0.23  
0.4  
0.39  
0.39  
0.18  
0.22  
0.3  
0.37  
0.3  
0.2  
0.4  
0.19  
0.35  
0.18  
0.13  
0.28  
0.34  
0.33  
0.37  
0.38  
0.31  
0.39  
0.37  
0.37  
0.18

0.39  
0.39  
0.32  
0.39  
0.24  
0.38  
0.27  
0.31  
0.29  
0.38  
0.34  
0.33  
0.01  
0.39  
0.24  
0.29  
0.14  
0.08  
0.39  
0.36  
0.39  
0.32  
0.34  
0.25  
0.33  
0.39  
0.35  
0.13  
0.18  
0.37  
0.14  
0.28  
0.35  
0.39  
0.25  
0.29  
0.29  
0.4  
0.16  
0.28  
0.31  
0.4  
0.38  
0.29  
0.32  
0.28  
0.39  
0.23  
0.21  
0.37  
0.07  
0.36  
0.21

0.23  
0.32  
0.22  
0.4  
0.26  
0.38  
0.4  
0.28  
0.29  
0.27  
0.35  
0.33  
0.25  
0.18  
0.1  
0.32  
0.31  
0.4  
0.34  
0.33  
0.3  
0.33  
0.38  
0.4  
0.27  
0.06  
0.37  
0.36  
0.39  
0.4  
0.38  
0.15  
0.32  
0.17  
0.4  
0.38  
0.38  
0.31  
0.38  
0.35  
0.37  
0.38  
0.23  
0.21  
0.1  
0.22  
0.12  
0.39  
0.37  
0.21  
0.37  
0.38  
0.28

0.38  
0.39  
0.12  
0.14  
0.26  
0.32  
0.16  
0.28  
0.15  
0.12  
0.3  
0.39  
0.36  
0.39  
0.34  
0.22  
0.38  
0.36  
0.35  
0.38  
0.11  
0.22  
0.35  
0.32  
0.22  
0.29  
0.27  
0.38  
0.38  
0.29  
0.29  
0.27  
0.34  
0.22  
0.4  
0.23  
0.27  
0.25  
0.23  
0.4  
0.31  
0.12  
0.34  
0.4  
0.21  
0.38  
0.11  
0.33  
0.32  
0.39  
0.39  
0.37  
0.36

0.28  
0.37  
0.33  
0.33  
0.3  
0.35  
0.32  
0.29  
0.39  
0.4  
0.4  
0.38  
0.32  
0.34  
0.32  
0.35  
0.38  
0.4  
0.39  
0.3  
0.38  
0.39  
0.33  
0.35  
0.39  
0.29  
0.18  
0.19  
0.17  
0.38  
0.29  
0.4  
0.18  
0.38  
0.33  
0.39  
0.22  
0.4  
0.19  
0.2  
0.31  
0.39  
0.35  
0.38  
0.37  
0.3  
0.38  
0.25  
0.33  
0.37  
0.39  
0.33  
0.37

0.4  
0.39  
0.4  
0.28  
0.32  
0.33  
0.35  
0.28  
0.27  
0.32  
0.33  
0.19  
0.39  
0.26  
0.37  
0.4  
0.39  
0.36  
0.39  
0.2  
0.32  
0.39  
0.39  
0.32  
0.4  
0.38  
0.16  
0.28  
0.16  
0.18  
0.4  
0.14  
0.36  
0.39  
0.38  
0.31  
0.4  
0.37  
0.4  
0.34  
0.37  
0.38  
0.39  
0.36  
0.4  
0.36  
0.34  
0.39  
0.16  
0.13  
0.22  
0.12  
0.3

0.21  
0.14  
0.38  
0.25  
0.13  
0.32  
0.36  
0.22  
0.29  
0.39  
0.25  
0.17  
0.32  
0.16  
0.26  
0.19  
0.26  
0.4  
0.33  
0.32  
0.34  
0.39  
0.3  
0.32  
0.4  
0.4  
0.18  
0.38  
0.27  
0.35  
0.4  
0.24  
0.25  
0.35  
0.39  
0.4  
0.4  
0.39  
0.39  
0.39  
0.39  
0.28  
0.21  
0.34  
0.27  
0.39  
0.38  
0.22  
0.2  
0.38  
0.38  
0.25  
0.35  
0.39

0.34  
0.36  
0.17  
0.34  
0.38  
0.14  
0.3  
0.25  
0.36  
0.32  
0.39  
0.3  
0.21  
0.19  
0.27  
0.21  
0.35  
0.16  
0.34  
0.4  
0.36  
0.26  
0.14  
0.33  
0.14  
0.27  
0.4  
0.23  
0.35  
0.2  
0.27  
0.25  
0.24  
0.28  
0.27  
0.16  
0.31  
0.25  
0.31  
0.13  
0.34  
0.33  
0.39  
0.38  
0.39  
0.39  
0.31  
0.28  
0.38  
0.33  
0.19  
0.19  
0.18



0.35  
0.33  
0.2  
0.31  
0.4  
0.3  
0.26  
0.22  
0.29  
0.37  
0.29  
0.4  
0.29  
0.35  
0.28  
0.4  
0.31  
0.22  
0.12  
0.35  
0.36  
0.24  
0.24  
0.23  
0.21  
0.4  
0.32  
0.23  
0.29  
0.29  
0.13  
0.18  
0.32  
0.39  
0.32  
0.29  
0.32  
0.39  
0.39  
0.13  
0.39  
0.37  
0.28  
0.36  
0.27  
0.39  
0.4  
0.29  
0.25  
0.19  
0.4  
0.4  
0.35

0.3  
0.39  
0.34  
0.29  
0.29  
0.32  
0.37  
0.33  
0.17  
0.39  
0.38  
0.28  
0.39  
0.3  
0.15  
0.39  
0.38  
0.35  
0.18  
0.35  
0.39  
0.24  
0.31  
0.16  
0.17  
0.38  
0.31  
0.19  
0.28  
0.31  
0.25  
0.29  
0.36  
0.26  
0.34  
0.25  
0.33  
0.39  
0.26  
0.3  
0.04  
0.27  
0.4  
0.33  
0.16  
0.06  
0.39  
0.14  
0.1  
0.16  
0.39  
0.32  
0.21

0.37  
0.28  
0.38  
0.39  
0.21  
0.35  
0.22  
0.23  
0.16  
0.38  
0.16  
0.15  
0.25  
0.39  
0.34  
0.32  
0.35  
0.38  
0.36  
0.34  
0.12  
0.2  
0.16  
0.39  
0.38  
0.32  
0.33  
0.32  
0.32  
0.31  
0.34  
0.37  
0.37  
0.38  
0.26  
0.38  
0.4  
0.39  
0.08  
0.21  
0.36  
0.33  
0.31  
0.29  
0.1  
0.37  
0.4  
0.4  
0.18  
0.38  
0.13  
0.17  
0.32

0.07  
0.29  
0.19  
0.14  
0.39  
0.23  
0.3  
0.12  
0.33  
0.39  
0.19  
0.38  
0.37  
0.35  
0.33  
0.22  
0.39  
0.19  
0.28  
0.34  
0.35  
0.36  
0.32  
0.23  
0.34  
0.38  
0.39  
0.38  
0.36  
0.31  
0.4  
0.37  
0.39  
0.33  
0.38  
0.35  
0.37  
0.28  
0.36  
0.4  
0.4  
0.17  
0.28  
0.33  
0.35  
0.39  
0.16  
0.15  
0.36  
0.38  
0.4  
0.37  
0.39

0.38  
0.2  
0.35  
0.38  
0.2  
0.39  
0.37  
0.39  
0.29  
0.26  
0.4  
0.4  
0.38  
0.4  
0.39  
0.38  
0.39  
0.2  
0.19  
0.32  
0.3  
0.32  
0.37  
0.39  
0.37  
0.15  
0.06  
0.4  
0.36  
0.36  
0.27  
0.39  
0.16  
0.15  
0.25  
0.35  
0.36  
0.25  
0.19  
0.2  
0.29  
0.26  
0.38  
0.39  
0.24  
0.1  
0.35  
0.08  
0.24  
0.39  
0.15  
0.27  
0.31

0.38  
0.39  
0.35  
0.35  
0.4  
0.36  
0.22  
0.4  
0.35  
0.32  
0.38  
0.37  
0.39  
0.19  
0.35  
0.4  
0.29  
0.31  
0.33  
0.28  
0.35  
0.32  
0.37  
0.39  
0.31  
0.15  
0.24  
0.3  
0.22  
0.33  
0.35  
0.24  
0.17  
0.38  
0.39  
0.11  
0.27  
0.22  
0.34  
0.39  
0.38  
0.32  
0.16  
0.29  
0.33  
0.39  
0.3  
0.27  
0.32  
0.29  
0.33  
0.4  
0.2

0.39  
0.36  
0.29  
0.39  
0.4  
0.14  
0.34  
0.27  
0.4  
0.33  
0.38  
0.31  
0.39  
0.22  
0.33  
0.17  
0.38  
0.32  
0.38  
0.13  
0.16  
0.39  
0.07  
0.37  
0.34  
0.33  
0.27  
0.36  
0.27  
0.32  
0.4  
0.38  
0.27  
0.29  
0.28  
0.39  
0.36  
0.14  
0.15  
0.19  
0.2  
0.39  
0.4  
0.32  
0.36  
0.34  
0.18  
0.3  
0.07  
0.39  
0.35  
0.36  
0.34

0.24  
0.39  
0.19  
0.37  
0.4  
0.09  
0.1  
0.16  
0.08  
0.38  
0.39  
0.4  
0.39  
0.35  
0.39  
0.39  
0.37  
0.14  
0.23  
0.35  
0.35  
0.32  
0.36  
0.4  
0.04  
0.36  
0.3  
0.37  
0.4  
0.32  
0.33  
0.35  
0.31  
0.26  
0.17  
0.39  
0.4  
0.22  
0.1  
0.22  
0.26  
0.18  
0.22  
0.6  
0.15  
0.32  
0.34  
0.31  
0.37  
0.25  
0.39  
0.29  
0.4



0.27  
0.38  
0.37  
0.39  
0.39  
0.39  
0.27  
0.37  
0.22  
0.16  
0.2  
0.4  
0.39  
0.4  
0.2  
0.32  
0.26  
0.34  
0.4  
0.34  
0.34  
0.31  
0.14  
0.31  
0.29  
0.38  
0.36  
0.33  
0.38  
0.35  
0.31  
0.39  
0.39  
0.34  
0.37  
0.39  
0.38  
0.4  
0.31  
0.32  
0.18  
0.4  
0.4  
0.37  
0.31  
0.39  
0.38  
0.37  
0.37  
0.38  
0.29  
0.34  
0.29

0.04  
0.27  
0.39  
0.38  
0.38  
0.32  
0.35  
0.29  
0.29  
0.38  
0.29  
0.37  
0.09  
0.4  
0.37  
0.38  
0.33  
0.12  
0.22  
0.19  
0.21  
0.17  
0.37  
0.4  
0.36  
0.37  
0.36  
0.35  
0.38  
0.34  
0.22  
0.31  
0.32  
0.33  
0.33  
0.33  
0.36  
0.18  
0.39  
0.29  
0.21  
0.3  
0.36  
0.06  
0.12  
0.28  
0.4  
0.33  
0.33  
0.29  
0.34  
0.33  
0.4

0.17  
0.29  
0.4  
0.39  
0.38  
0.32  
0.36  
0.4  
0.15  
0.34  
0.32  
0.3  
0.3  
0.25  
0.38  
0.33  
0.39  
0.25  
0.26  
0.13  
0.38  
0.11  
0.06  
0.22  
0.22  
0.24  
0.21  
0.17  
0.2  
0.4  
0.38  
0.3  
0.38  
0.32  
0.38  
0.24  
0.28  
0.3  
0.22  
0.34  
0.35  
0.37  
0.27  
0.17  
0.39  
0.15  
0.32  
0.34  
0.39  
0.4  
0.19  
0.09  
0.37

0.4  
0.19  
0.4  
0.34  
0.39  
0.34  
0.4  
0.29  
0.36  
0.27  
0.29  
0.33  
0.35  
0.32  
0.13  
0.26  
0.28  
0.37  
0.4  
0.37  
0.25  
0.35  
0.4  
0.4  
0.29  
0.34  
0.19  
0.4  
0.22  
0.36  
0.18  
0.39  
0.32  
0.3  
0.33  
0.37  
0.34  
0.37  
0.33  
0.34  
0.34  
0.15  
0.39  
0.32  
0.36  
0.4  
0.27  
0.3  
0.36  
0.29  
0.1  
0.21  
0.2

0.38  
0.05  
0.11  
0.2  
0.22  
0.37  
0.39  
0.4  
0.35  
0.3  
0.22  
0.39  
0.2  
0.14  
0.37  
0.32  
0.21  
0.15  
0.38  
0.32  
0.36  
0.39  
0.38  
0.31  
0.34  
0.34  
0.33  
0.36  
0.39  
0.34  
0.4  
0.4  
0.33  
0.29  
0.36  
0.31  
0.28  
0.24  
0  
0.37  
0.38  
0.28  
0.28  
0.15  
0.38  
0.29  
0.11  
0.21  
0.36  
0.19  
0.22  
0.37  
0.33

0.08  
0.38  
0.23  
0.38  
0.34  
0.35  
0.35  
0.4  
0.32  
0.35  
0.32  
0.18  
0.36  
0.23  
0.4  
0.27  
0.33  
0.26  
0.2  
0.39  
0.26  
0.38  
0.39  
0.24  
0.19  
0.39  
0.36  
0.36  
0.4  
0.33  
0.31  
0.21  
0.18  
0.14  
0.13  
0.21  
0.35  
0.34  
0.36  
0.32  
0.39  
0.37  
0.4  
0.38  
0.33  
0.4  
0.26  
0.38  
0.39  
0.31  
0.39  
0.31  
0.39

0.31  
0.11  
0.22  
0.36  
0.19  
0.39  
0.32  
0.24  
0.4  
0.35  
0.35  
0.26  
0.39  
0.04  
0.08  
0.4  
0.22  
0.22  
0.29  
0.4  
0.36  
0.33  
0.33  
0.39  
0.32  
0.34  
0.38  
0.37  
0.18  
0.36  
0.37  
0.4  
0.23  
0.38  
0.37  
0.37  
0.33  
0.13  
0.4  
0.23  
0.34  
0.19  
0.12  
0.38  
0.32  
0.4  
0.37  
0.35  
0.2  
0.39  
0.34  
0.34  
0.16

0.35  
0.23  
0.21  
0.18  
0.39  
0.39  
0.37  
0.33  
0.38  
0.37  
0.29  
0.38  
0.38  
0.4  
0.38  
0.11  
0.16  
0.36  
0.33  
0.36  
0.35  
0.28  
0.31  
0.3  
0.17  
0.19  
0.26  
0.11  
0.2  
0.35  
0.39  
0.28  
0.27  
0.12  
0.39  
0.34  
0.39  
0.22  
0.33  
0.35  
0.17  
0.23  
0.22  
0.3  
0.38  
0.4  
0.23  
0.11  
0.37  
0.4  
0.22  
0.21  
0.4



0.17  
0.36  
0.27  
0.25  
0.35  
0.34  
0.4  
0.14  
0.05  
0.17  
0.11  
0.28  
0.3  
0.35  
0.4  
0.24  
0.2  
0.39  
0.12  
0.32  
0.37  
0.31  
0.34  
0.36  
0.18  
0.23  
0.4  
0.39  
0.37  
0.27  
0.23  
0.4  
0.29  
0.34  
0.21  
0.38  
0.16  
0.14  
0.36  
0.17  
0.27  
0.21  
0.17  
0.39  
0.4  
0.22  
0.4  
0.4  
0.36  
0.32  
0.39  
0.21  
0.38

0.39  
0.39  
0.08  
0.4  
0.39  
0.36  
0.4  
0.32  
0.38  
0.21  
0.36  
0.2  
0.34  
0.85  
0.37  
0.09  
0.36  
0.24  
0.39  
0.39  
0.39  
0.4  
0.26  
0.24  
0.37  
0.17  
0.39  
0.34  
0.36  
0.33  
0.25  
0.35  
0.14  
0.26  
0.29  
0.4  
0.31  
0.3  
0.27  
0.38  
0.24  
0.21  
0.33  
0.34  
0.23  
0.25  
0.33  
0.39  
0.4  
0.36  
0.4  
0.35  
0.16

0.31  
0.21  
0.39  
0.33  
0.32  
0.35  
0.23  
0.17  
0.19  
0.37  
0.31  
0.38  
0.27  
0.38  
0.31  
0.31  
0.37  
0.4  
0.38  
0.36  
0.28  
0.28  
0.21  
0.19  
0.36  
0.34  
0.2  
0.4  
0.38  
0.4  
0.4  
0.36  
0.37  
0.38  
0.29  
0.37  
0.4  
0.37  
0.37  
0.4  
0.36  
0.4  
0.38  
0.38  
0.22  
0.23  
0.39  
0.36  
0.19  
0.39  
0.4  
0.36  
0.4

0.37  
0.3  
0.28  
0.36  
0.4  
0.27  
0.32  
0.39  
0.4  
0.4  
0.2  
0.33  
0.19  
0.38  
0.33  
0.33  
0.38  
0.37  
0.3  
0.17  
0.31  
0.19  
0.37  
0.26  
0.39  
0.3  
0.38  
0.38  
0.28  
0.4  
0.38  
0.3  
0.38  
0.4  
0.2  
0.39  
0.4  
0.26  
0.11  
0.24  
0.37  
0.33  
0.36  
0.32  
0.21  
0.38  
0.15  
0.33  
0.38  
0.26  
0.39  
0.31  
0.39

0.4  
0.23  
0.37  
0.37  
0.39  
0.27  
0.32  
0.28  
0.27  
0.36  
0.34  
0.04  
0.34  
0.17  
0.35  
0.23  
0.37  
0.31  
0.35  
0.29  
0.29  
0.4  
0.4  
0.37  
0.35  
0.4  
0.39  
0.37  
0.25  
0.27  
0.3  
0.24  
0.34  
0.24  
0.33  
0.4  
0.07  
0.39  
0.37  
0.34  
0.25  
0.16  
0.38  
0.38  
0.39  
0.35  
0.38  
0.39  
0.26  
0.18  
0.4  
0.4  
0.36

0.35  
0.13  
0.29  
0.4  
0.39  
0.4  
0.35  
0.36  
0.39  
0.37  
0.4  
0  
0.18  
0.3  
0.16  
0.39  
0.14  
0.38  
0.37  
0.38  
0.18  
0.39  
0.29  
0.4  
0.15  
0.33  
0.37  
0.35  
0.31  
0.19  
0  
0.4  
0.37  
0.33  
0.4  
0.32  
0.39  
0.39  
0.36  
0.18  
0.19  
0.31  
0.05  
0.2  
0.14  
0.27  
0.25  
0.2  
0.2  
0.37  
0.2  
0.39  
0.33

0.09  
0.37  
0.34  
0.1  
0.39  
0.28  
0.12  
0.28  
0.27  
0.38  
0.34  
0.34  
0.16  
0.25  
0.12  
0.31  
0.25  
0.32  
0.34  
0.4  
0.33  
0.14  
0.39  
0.25  
0.35  
0.3  
0.13  
0.4  
0.27  
0.18  
0.36  
0.33  
0.36  
0.34  
0.39  
0.38  
0.37  
0.25  
0.4  
0.26  
0.34  
0.21  
0.4  
0.17  
0.34  
0.26  
0.35  
0.31  
0.33  
0.27  
0.21  
0.36  
0.38

0.39  
0.32  
0.16  
0.16  
0.36  
0.31  
0.37  
0.07  
0.38  
0.39  
0.28  
0.39  
0.36  
0.32  
0.38  
0.3  
0.31  
0.38  
0.35  
0.39  
0.35  
0.31  
0.4  
0.27  
0.34  
0.12  
0.08  
0.38  
0.37  
0.21  
0.38  
0.35  
0.34  
0.25  
0.4  
0.4  
0.09  
0.37  
0.31  
0.17  
0.39  
0.32  
0.37  
0.22  
0.36  
0.34  
0.4  
0.2  
0.27  
0.36  
0.29  
0.31  
0.26



0.38  
0.4  
0.39  
0.31  
0.13  
0.39  
0.33  
0.39  
0.35  
0.4  
0.35  
0.39  
0.39  
0.4  
0.39  
0.4  
0.33  
0.37  
0.08  
0.37  
0.13  
0.37  
0.3  
0.2  
0.28  
0.39  
0.34  
0.31  
0.34  
0.33  
0.31  
0.38  
0.4  
0.23  
0.39  
0.39  
0.32  
0.4  
0.38  
0.25  
0.35  
0.4  
0.4  
0.34  
0.36  
0.4  
0.22  
0.36  
0.24  
0.35  
0.37  
0.38  
0.25

0.14  
0.4  
0.38  
0.35  
0.1  
0.38  
0.32  
0.26  
0.34  
0.38  
0.22  
0.31  
0.4  
0.31  
0.22  
0.27  
0.27  
0.39  
0.33  
0.38  
0.38  
0.37  
0.19  
0.4  
0.08  
0.3  
0.31  
0.35  
0.34  
0.29  
0.27  
0.21  
0.35  
0.4  
0.15  
0.4  
0.36  
0.39  
0.38  
0.4  
0.4  
0.27  
0.36  
0.38  
0.22  
0.22  
0.22  
0.36  
0.39  
0.4  
0.24  
0.4  
0.31

0.39  
0.32  
0.32  
0.14  
0.18  
0.36  
0.08  
0.17  
0.28  
0.33  
0.4  
0.4  
0.3  
0.4  
0.4  
0.3  
0.4  
0.36  
0.26  
0.24  
0.39  
0.24  
0.39  
0.38  
0.33  
0.3  
0.38  
0.37  
0.4  
0.29  
0.38  
0.4  
0.4  
0.39  
0.33  
0.4  
0.39  
0.4  
0.37  
0.37  
0.4  
0.29  
0.35  
0.38  
0.38  
0.4  
0.38  
0.26  
0.21  
0.4  
0.35  
0.38  
0.39

0.31  
0.39  
0.32  
0.4  
0.35  
0.35  
0.22  
0.31  
0.19  
0.33  
0.38  
0.17  
0.3  
0.4  
0.3  
0.12  
0.09  
0.2  
0.34  
0.31  
0.22  
0.21  
0.26  
0.36  
0.16  
0.27  
0.27  
0.32  
0.26  
0.4  
0.39  
0.2  
0.33  
0.16  
0.32  
0.4  
0.3  
0.4  
0.24  
0.39  
0.29  
0.31  
0.25  
0.36  
0.4  
0.36  
0.39  
0.38  
0.29  
0.37  
0.31  
0.37  
0.23

0.39  
0.38  
0.35  
0.32  
0.16  
0.09  
0.33  
0.36  
0.12  
0.06  
0.11  
0.29  
0.13  
0.1  
0.2  
0.36  
0.17  
0.17  
0.12  
0.35  
0.4  
0.38  
0.37  
0.37  
0.39  
0.38  
0.39  
0.39  
0.27  
0.24  
0.4  
0.12  
0.28  
0.25  
0.38  
0.29  
0.26  
0.29  
0.28  
0.13  
0.18  
0.4  
0.35  
0.12  
0.4  
0.4  
0.36  
0.3  
0.39  
0.38  
0.28  
0.25  
0.18

0.35  
0.26  
0.29  
0.28  
0.35  
0.27  
0.34  
0.22  
0.17  
0.21  
0.23  
0.24  
0.36  
0.36  
0.21  
0.3  
0.35  
0.06  
0.38  
0.39  
0.31  
0.21  
0.14  
0.33  
0.38  
0.34  
0.36  
0.37  
0.38  
0.37  
0.23  
0.4  
0.25  
0.23  
0.36  
0.27  
0.29  
0.36  
0.24  
0.11  
0.37  
0.32  
0.18  
0.33  
0.34  
0.33  
0.26  
0.19  
0.17  
0.26  
0.29  
0.39  
0.39

0.33  
0.38  
0.32  
0.25  
0.4  
0.1  
0.27  
0.13  
0.32  
0.34  
0.38  
0.37  
0.27  
0.31  
0.36  
0.29  
0.38  
0.4  
0.29  
0.39  
0.26  
0.31  
0.19  
0.39  
0.4  
0.36  
0.36  
0.37  
0.39  
0.34  
0.13  
0.2  
0.34  
0.36  
0.38  
0.27  
0.36  
0.14  
0.4  
0.39  
0.35  
0.4  
0.4  
0.19  
0.38  
0.34  
0.4  
0.39  
0.4  
0.22  
0.37  
0.4  
0.36

0.23  
0.37  
0.38  
0.4  
0.27  
0.38  
0.3  
0.38  
0.12  
0.35  
0.4  
0.31  
0.28  
0.29  
0.38  
0.16  
0.15  
0.38  
0.33  
0.37  
0.32  
0.29  
0.38  
0.27  
0.36  
0.36  
0.38  
0.22  
0.36  
0.23  
0.33  
0.23  
0.28  
0.35  
0.34  
0.35  
0.37  
0.35  
0.33  
0.38  
0.37  
0.34  
0.4  
0.38  
0.38  
0.4  
0.34  
0.13  
0.2  
0.24  
0.29  
0.4  
0.3



0.21  
0.35  
0.14  
0.19  
0.39  
0.28  
0.36  
0.4  
0.35  
0.2  
0.32  
0.36  
0.29  
0.28  
0.16  
0.08  
0.03  
0.27  
0.31  
0.4  
0.39  
0.33  
0.4  
0.28  
0.22  
0.33  
0.24  
0.37  
0.4  
0.31  
0.33  
0.4  
0.31  
0.26  
0.38  
0.38  
0.39  
0.39  
0.37  
0.35  
0.35  
0.26  
0.26  
0.39  
0.24  
0.3  
0.4  
0.33  
0.15  
0.22  
0.32  
0.39  
0.32

0.14  
0.35  
0.25  
0.1  
0.19  
0.37  
0.33  
0.36  
0.23  
0.29  
0.24  
0.31  
0.39  
0.4  
0.37  
0.39  
0.25  
0.28  
0.17  
0.01  
0.2  
0.36  
0.31  
0.34  
0.22  
0.36  
0.39  
0.19  
0.37  
0.23  
0.38  
0.17  
0.39  
0.31  
0.17  
0.3  
0.22  
0.16  
0.29  
0.32  
0.33  
0.38  
0.38  
0.39  
0.39  
0.34  
0.37  
0.34  
0.3  
0.38  
0.35  
0.4  
0.31

0.33  
0.36  
0.39  
0.39  
0.18  
0.4  
0.16  
0.25  
0.33  
0.35  
0.39  
0.3  
0.39  
0.4  
0.34  
0.36  
0.33  
0.22  
0.29  
0.36  
0.38  
0.25  
0.29  
0.4  
0.39  
0.38  
0.19  
0.31  
0.4  
0.37  
0.13  
0.19  
0.12  
0.33  
0.31  
0.27  
0.37  
0.08  
0.34  
0.19  
0.39  
0.4  
0.23  
0.37  
0.25  
0.32  
0.4  
0.33  
0.37  
0.14  
0.19  
0.21  
0.24

0.32  
0.38  
0.18  
0.28  
0.34  
0.17  
0.38  
0.12  
0.19  
0.27  
0.17  
0.4  
0.38  
0.3  
0.36  
0.38  
0.35  
0.32  
0.26  
0.32  
0.39  
0.29  
0.35  
0.37  
0.05  
0.4  
0.13  
0.38  
0.37  
0.28  
0.37  
0.33  
0.38  
0.33  
0.39  
0.34  
0.39  
0.37  
0.25  
0.12  
0.39  
0.38  
0.38  
0.38  
0.21  
0.35  
0.31  
0.3  
0.38  
0.26  
0.12  
0.17  
0.36

0.36  
0.32  
0.24  
0.39  
0.22  
0.4  
0.14  
0.28  
0.36  
0.34  
0.34  
0.26  
0.39  
0.34  
0.38  
0.24  
0.2  
0.32  
0.09  
0.38  
0.39  
0.21  
0.25  
0.26  
0.22  
0.39  
0.22  
0.32  
0.36  
0.39  
0.4  
0.39  
0.29  
0.35  
0.35  
0.16  
0.31  
0.36  
0.28  
0.21  
0.22  
0.25  
0.28  
0.3  
0.4  
0.31  
0.34  
0.39  
0.37  
0.33  
0.38  
0.39  
0.27

0.38  
0.39  
0.37  
0.22  
0.36  
0.39  
0.32  
0.35  
0.28  
0.27  
0.36  
0.24  
0.22  
0.38  
0.22  
0.36  
0.22  
0.1  
0.4  
0.2  
0.03  
0.37  
0.31  
0.36  
0.34  
0.26  
0.33  
0.4  
0.33  
0.38  
0.36  
0.29  
0.27  
0.4  
0.39  
0.32  
0.4  
0.4  
0.27  
0.39  
0.4  
0.39  
0.18  
0.3  
0.26  
0.31  
0.33  
0.38  
0.4  
0.4  
0.33  
0.31  
0.4

0.28  
0.17  
0.25  
0.24  
0.34  
0.19  
0.32  
0.13  
0.33  
0.33  
0.35  
0.25  
0.38  
0.4  
0.32  
0.26  
0.21  
0.21  
0.33  
0.33  
0.39  
0.32  
0.36  
0.37  
0.24  
0.39  
0.37  
0.37  
0.25  
0.32  
0.39  
0.27  
0.4  
0.12  
0.24  
0.16  
0.36  
0.35  
0.38  
0.29  
0.33  
0.2  
0.25  
0.14  
0.38  
0.3  
0.24  
0.4  
0.33  
0.34  
0.39  
0.39  
0.38

0.2  
0.21  
0.22  
0.17  
0.27  
0.38  
0.28  
0.36  
0.39  
0.33  
0.34  
0.28  
0.17  
0.39  
0.1  
0.04  
0.07  
0.28  
0.4  
0.09  
0.22  
0.34  
0.4  
0.4  
0.39  
0.35  
0.37  
0.39  
0.37  
0.3  
0.33  
0.39  
0.2  
0.37  
0.32  
0.4  
0.27  
0.38  
0.38  
0.17  
0.26  
0.18  
0.15  
0.34  
0.34  
0.08  
0.36  
0.4  
0.4  
0.35  
0.25  
0.15  
0.38



0.32  
0.11  
0.3  
0.34  
0.35  
0.27  
0.29  
0.36  
0.13  
0.36  
0.39  
0.4  
0.4  
0.36  
0.36  
0.31  
0.37  
0.23  
0.37  
0.37  
0.24  
0.38  
0.38  
0.19  
0.29  
0.33  
0.38  
0.38  
0.31  
0.4  
0.37  
0.39  
0.34  
0.27  
0.3  
0.33  
0.38  
0.24  
0.18  
0.35  
0.4  
0.34  
0.16  
0.29  
0.4  
0.35  
0.39  
0.28  
0.16  
0.39  
0.4  
0.38  
0.39

0.26  
0.15  
0.35  
0.33  
0.4  
0.37  
0.4  
0.4  
0.19  
0.29  
0.18  
0.39  
0.39  
0.4  
0.4  
0.27  
0.38  
0.39  
0.23  
0.39  
0.26  
0.27  
0.37  
0.38  
0.27  
0.26  
0.34  
0.37  
0.17  
0.37  
0.36  
0.38  
0.33  
0.32  
0.3  
0.4  
0.38  
0.39  
0.28  
0.3  
0.11  
0.33  
0.26  
0.28  
0.34  
0.2  
0.1  
0.1  
0.36  
0.21  
0.14  
0.37  
0.32

0.26  
0.35  
0.31  
0.4  
0.34  
0.23  
0.25  
0.29  
0.17  
0.28  
0.22  
0.25  
0.31  
0.11  
0.11  
0.12  
0.19  
0.28  
0.4  
0.36  
0.38  
0.23  
0.39  
0.39  
0.38  
0.34  
0.4  
0.38  
0.35  
0.39  
0.33  
0.39  
0.38  
0.36  
0.38  
0.4  
0.36  
0.39  
0.39  
0.39  
0.4  
0.4  
0.37  
0.39  
0.39  
0.31  
0.4  
0.36  
0.36  
0.39  
0.38  
0.39  
0.4

0.35  
0.39  
0.39  
0.4  
0.24  
0.38  
0.28  
0.4  
0.37  
0.4  
0.4  
0.25  
0.4  
0.34  
0.38  
0.38  
0.24  
0.3  
0.39  
0.36  
0.39  
0.4  
0.34  
0.32  
0.39  
0.37  
0.28  
0.4  
0.38  
0.37  
0.31  
0.34  
0.39  
0.38  
0.36  
0.2  
0.32  
0.38  
0.33  
0.39  
0.39  
0.35  
0.21  
0.38  
0.28  
0.35  
0.19  
0.38  
0.36  
0.37  
0.14  
0.31  
0.23

0.21  
0.33  
0.37  
0.18  
0.12  
0.32  
0.31  
0.38  
0.3  
0.31  
0.19  
0.11  
0.25  
0.34  
0.27  
0.4  
0.38  
0.31  
0.22  
0.4  
0.2  
0.4  
0.21  
0.22  
0.2  
0.39  
0.16  
0.3  
0.29  
0.35  
0.38  
0.37  
0.29  
0.3  
0.23  
0.11  
0.17  
0.23  
0.08  
0.31  
0.37  
0.39  
0.14  
0.17  
0.36  
0.38  
0.2  
0.28  
0.22  
0.37  
0.3  
0.27  
0.28

0.4  
0.14  
0.11  
0.34  
0.38  
0.36  
0.24  
0.4  
0.38  
0.34  
0.4  
0.38  
0.39  
0.19  
0.37  
0.4  
0.13  
0.17  
0.13  
0.29  
0.4  
0.29  
0.26  
0.13  
0.22  
0.23  
0.28  
0.37  
0.29  
0.29  
0.35  
0.29  
0.39  
0.33  
0.27  
0.39  
0.38  
0.92  
0.35  
0.38  
0.4  
0.36  
0.36  
0.39  
0.31  
0.32  
0.39  
0.26  
0.39  
0.34  
0.19  
0.2  
0.34

0.4  
0.38  
0.4  
0.32  
0.38  
0.4  
0.39  
0.32  
0.24  
0.39  
0.3  
0.39  
0.4  
0.33  
0.39  
0.36  
0.4  
0.4  
0.4  
0.39  
0.39  
0.4  
0.4  
0.37  
0.38  
0.39  
0.4  
0.37  
0.37  
0.39  
0.37  
0.4  
0.39  
0.36  
0.35  
0.19  
0.21  
0.23  
0.4  
0.37  
0.38  
0.35  
0.19  
0.35  
0.39  
0.18  
0.21  
0.39  
0.35  
0.38  
0.4  
0.4  
0.4

0.36  
0.39  
0.27  
0.38  
0.35  
0.38  
0.36  
0.35  
0.38  
0.4  
0.39  
0.36  
0.24  
0.37  
0.34  
0.19  
0.39  
0.39  
0.33  
0.34  
0.26  
0.16  
0.37  
0.16  
0.39  
0.38  
0.34  
0.29  
0.39  
0.39  
0.39  
0.39  
0.22  
0.25  
0.33  
0.31  
0.3  
0.39  
0.4  
0.4  
0.37  
0.33  
0.36  
0.38  
0.3  
0.15  
0.35  
0.36  
0.21  
0.39  
0.34  
0.33  
0.22  
0.34



0.39  
0.31  
0.4  
0.4  
0.4  
0.39  
0.38  
0.38  
0.4  
0.39  
0.39  
0.38  
0.37  
0.39  
0.26  
0.16  
0.39  
0.36  
0.33  
0.23  
0.37  
0.34  
0.36  
0.17  
0.4  
0.3  
0.28  
0.29  
0.21  
0.4  
0.23  
0.26  
0.38  
0.36  
0.39  
0.33  
0.34  
0.4  
0.37  
0.4  
0.4  
0.39  
0.27  
0.23  
0.37  
0.36  
0.4  
0.38  
0.26  
0.21  
0.39  
0.37  
0.4

0.25  
0.3  
0.29  
0.24  
0.34  
0.18  
0.38  
0.23  
0.2  
0.4  
0.4  
0.29  
0.37  
0.37  
0.37  
0.4  
0.4  
0.21  
0.11  
0.21  
0.18  
0.07  
0.32  
0.2  
0.29  
0.2  
0.36  
0.4  
0.38  
0.36  
0.38  
0.36  
0.35  
0.38  
0.38  
0.4  
0.4  
0.24  
0.37  
0.19  
0.39  
0.36  
0.34  
0.19  
0.2  
0.4  
0  
0.26  
0.39  
0.17  
0.36  
0.28  
0.09

0.4  
0.21  
0.16  
0.33  
0.39  
0.4  
0.38  
0.39  
0.38  
0.39  
0.4  
0.2  
0.4  
0.24  
0.14  
0.18  
0.39  
0.34  
0.38  
0.4  
0.32  
0.32  
0.35  
0.3  
0.39  
0.26  
0.24  
0.4  
0.19  
0.39  
0.35  
0.38  
0.24  
0.31  
0.25  
0.4  
0.2  
0.35  
0.25  
0.37  
0.35  
0.34  
0.36  
0.39  
0.37  
0.34  
0.27  
0.21  
0.4  
0.37  
0.32  
0.22  
0.16

0.38  
0.15  
0.19  
0.32  
0.22  
0.31  
0.16  
0.16  
0.34  
0.34  
0.38  
0.24  
0.29  
0.35  
0.4  
0.39  
0.13  
0.26  
0.05  
0.19  
0.21  
0.19  
0.12  
0.16  
0.37  
0.36  
0.39  
0.39  
0.35  
0.4  
0.16  
0.25  
0.31  
0.39  
0.11  
0.39  
0.17  
0.33  
0.12  
0.31  
0.39  
0.4  
0.4  
0.34  
0.21  
0.25  
0.38  
0.35  
0.18  
0.4  
0.38  
0.28  
0.4

0.39  
0.39  
0.23  
0.19  
0.38  
0.4  
0.33  
0.3  
0.37  
0.4  
0.27  
0.14  
0.14  
0.38  
0.37  
0.23  
0.37  
0.24  
0.4  
0.36  
0.4  
0.35  
0.32  
0.38  
0.35  
0.39  
0.4  
0.34  
0.39  
0.33  
0.22  
0.4  
0.37  
0.39  
0.28  
0.29  
0.27  
0.36  
0.39  
0.24  
0.39  
0.39  
0.09  
0.4  
0.4  
0.16  
0.16  
0.34  
0.34  
0.21  
0.35  
0.3  
0.37

0.4  
0.4  
0.26  
0.38  
0.39  
0.37  
0.39  
0.36  
0.18  
0.3  
0.33  
0.38  
0.33  
0.39  
0.39  
0.32  
0.39  
0.28  
0.4  
0.3  
0.4  
0.27  
0.3  
0.27  
0.12  
0.36  
0.11  
0.32  
0.34  
0.19  
0.16  
0.36  
0.17  
0.2  
0.11  
0.38  
0.31  
0.34  
0.34  
0.4  
0.24  
0.3  
0.39  
0.35  
0.3  
0.31  
0.38  
0.26  
0.15  
0.4  
0.28  
0.36  
0.25

0.4  
0.35  
0.2  
0.07  
0.04  
0.39  
0.34  
0.22  
0.27  
0.03  
0.38  
0.28  
0.21  
0.33  
0.33  
0.16  
0.23  
0.37  
0.39  
0.39  
0.27  
0.37  
0.38  
0.34  
0.36  
0.28  
0.16  
0.36  
0.2  
0.37  
0.28  
0.33  
0.15  
0.11  
0.14  
0.4  
0.39  
0.2  
0.04  
0.22  
0.4  
0.33  
0.4  
0.08  
0.27  
0.22  
0.4  
0.26  
0.28  
0.33  
0.27  
0.38  
0.39

0.39  
0.4  
0.38  
0.13  
0.2  
0.18  
0.24  
0.34  
0.39  
0.33  
0.4  
0.35  
0.39  
0.25  
0.39  
0.4  
0.38  
0.38  
0.33  
0.39  
0.1  
0.4  
0.36  
0.16  
0.27  
0.39  
0.38  
0.33  
0.4  
0.39  
0.38  
0.39  
0.18  
0.38  
0.29  
0.38  
0.34  
0.37  
0.38  
0.33  
0.15  
0.13  
0.02  
0.18  
0.2  
0.29  
0.4  
0.1  
0.38  
0.3  
0.34  
0.4  
0.39



0.34  
0.37  
0.3  
0.4  
0.19  
0.18  
0.37  
0.38  
0.37  
0.34  
0.38  
0.16  
0.28  
0.38  
0.36  
0.28  
0.36  
0.36  
0.4  
0.4  
0.36  
0.39  
0.4  
0.35  
0.31  
0.4  
0.38  
0.37  
0.16  
0.39  
0.29  
0.36  
0.18  
0.17  
0.4  
0.32  
0.36  
0.15  
0.38  
0.4  
0.2  
0.17  
0.4  
0.25  
0.4  
0  
0.23  
0.17  
0.35  
0.4  
0.35  
0.4  
0.32

0.4  
0.27  
0.39  
0.35  
0.36  
0.38  
0.4  
0.25  
0.4  
0.4  
0.29  
0.3  
0.28  
0.2  
0.39  
0.4  
0.32  
0.39  
0.33  
0.4  
0.15  
0.11  
0.17  
0.34  
0.38  
0.4  
0.39  
0.31  
0.26  
0.18  
0.31  
0.11  
0.19  
0.37  
0.38  
0.26  
0.34  
0.36  
0.29  
0.12  
0.32  
0.32  
0.35  
0.37  
0.3  
0.3  
0.4  
0.4  
0.21  
0.39  
0.35  
0.4  
0.4

0.38  
0.4  
0.26  
0.29  
0.27  
0.39  
0.33  
0.4  
0.27  
0.36  
0.36  
0.07  
0.33  
0.2  
0.34  
0.38  
0.4  
0.19  
0.28  
0.29  
0.25  
0.38  
0.28  
0.19  
0.14  
0.33  
0.4  
0.17  
0.29  
0.14  
0.12  
0.14  
0.32  
0.25  
0.3  
0.36  
0.4  
0.28  
0.27  
0.37  
0.31  
0.22  
0.4  
0.11  
0.19  
0.22  
0.36  
0.34  
0.39  
0.3  
0.36  
0.39  
0.39

0.39  
0.39  
0.31  
0.33  
0.3  
0.39  
0.33  
0.22  
0.4  
0.05  
0.21  
0.38  
0.4  
0.27  
0.15  
0.34  
0.38  
0.36  
0.36  
0.36  
0.4  
0.38  
0.39  
0.27  
0.28  
0.11  
0.32  
0.4  
0.25  
0.31  
0.17  
0.3  
0.36  
0.31  
0.24  
0.31  
0.36  
0.12  
0.25  
0.38  
0.28  
0.4  
0.39  
0.28  
0.16  
0.35  
0.33  
0.36  
0.35  
0.33  
0.31  
0.29  
0.17

0.37  
0.35  
0.4  
0.18  
0.36  
0.17  
0.36  
0.25  
0.36  
0.36  
0.39  
0.38  
0.06  
0.31  
0.31  
0.4  
0.27  
0.23  
0.3  
0.4  
0.12  
0.4  
0  
0.09  
0.4  
0.32  
0.38  
0.35  
0.28  
0.38  
0.24  
0.24  
0.16  
0.11  
0.38  
0.35  
0.29  
0.18  
0.39  
0.21  
0.37  
0.18  
0.17  
0.39  
0.4  
0.22  
0.23  
0.21  
0.24  
0.29  
0.35  
0.17  
0.22

0.36  
0.27  
0.33  
0.37  
0.39  
0.32  
0.39  
0.37  
0.38  
0.36  
0.35  
0.32  
0.4  
0.38  
0.34  
0.36  
0.4  
0.39  
0.4  
0.3  
0.36  
0.38  
0.26  
0.11  
0.39  
0.34  
0.2  
0.39  
0.09  
0.29  
0.36  
0.25  
0.36  
0.22  
0.39  
0.4  
0.39  
0.19  
0.36  
0.32  
0.13  
0.36  
0.24  
0.3  
0.26  
0.39  
0.38  
0.38  
0.27  
0.37  
0.33  
0.14  
0.33

0.17  
0.19  
0.23  
0.27  
0.19  
0.31  
0.4  
0.3  
0.15  
0.16  
0.39  
0.09  
0.38  
0.27  
0.32  
0.25  
0.17  
0.22  
0.25  
0.4  
0.39  
0.27  
0.31  
0.2  
0.3  
0.36  
0.3  
0.38  
0.39  
0.33  
0.17  
0.24  
0.4  
0.39  
0.35  
0.25  
0.26  
0.14  
0.31  
0.26  
0.34  
0.2  
0.27  
0.15  
0.32  
0.35  
0.36  
0.26  
0.38  
0.38  
0.31  
0.11  
0.18

0.36  
0.4  
0.39  
0.34  
0.17  
0.37  
0.35  
0.28  
0.32  
0.4  
0.4  
0.23  
0.33  
0.11  
0.39  
0.29  
0.39  
0.35  
0.32  
0.33  
0.19  
0.28  
0.31  
0.18  
0.34  
0.22  
0.38  
0.19  
0.11  
0.2  
0.35  
0.19  
0.13  
0.18  
0.19  
0.21  
0.35  
0.4  
0.34  
0.25  
0.4  
0.11  
0.39  
0.4  
0.22  
0.39  
0.3  
0.29  
0.13  
0.17  
0.04  
0.66  
0.31



0.39  
0.28  
0.36  
0.35  
0.4  
0.38  
0.24  
0.37  
0.38  
0.4  
0.34  
0.25  
0.28  
0.38  
0.39  
0.35  
0.28  
0.38  
0.37  
0.39  
0.26  
0.12  
0.27  
0.29  
0.21  
0.21  
0.29  
0.31  
0.17  
0.28  
0.32  
0.27  
0.35  
0.4  
0.08  
0.36  
0.39  
0.31  
0.3  
0.13  
0.39  
0.31  
0.3  
0.38  
0.22  
0.2  
0.4  
0.14  
0.38  
0.32  
0  
0.21  
0.39

0.33  
0.39  
0.38  
0.39  
0.37  
0.36  
0.34  
0.33  
0.38  
0  
0.39  
0.38  
0.36  
0.4  
0.36  
0.35  
0.33  
0.38  
0.38  
0.33  
0.38  
0.33  
0.37  
0.37  
0.4  
0.32  
0.26  
0.22  
0.4  
0.37  
0.34  
0.4  
0.27  
0.33  
0.4  
0.27  
0.4  
0.4  
0.38  
0.82  
0.38  
0.39  
0.34  
0.38  
0.38  
0.39  
0.38  
0.4  
0.37  
0.4  
0.38  
0.32  
0.21

0.37  
0.37  
0.38  
0.38  
0.38  
0.4  
0.37  
0.36  
0.37  
0.24  
0.29  
0.22  
0.23  
0.27  
0.38  
0.4  
0.26  
0.31  
0.37  
0.37  
0.38  
0.68  
0.38  
0.31  
0.05  
0.34  
0.26  
0.31  
0.17  
0.4  
0.05  
0.35  
0.4  
0.4  
0.38  
0.26  
0.23  
0.16  
0.17  
0.28  
0.14  
0.17  
0.36  
0.4  
0.35  
0.2  
0.35  
0.23  
0.39  
0.3  
0.31  
0.4  
0.4

0.31  
0.4  
0.38  
0.4  
0.31  
0.37  
0.34  
0.39  
0.36  
0.39  
0.38  
0.33  
0.2  
0.33  
0.29  
0.33  
0.32  
0.38  
0.38  
0.4  
0.79  
0.33  
0.4  
0.34  
0.4  
0.38  
0.38  
0.4  
0.31  
0.4  
0.25  
0.3  
0.39  
0.4  
0.38  
0.4  
0.39  
0.39  
0.4  
0.39  
0.39  
0.38  
0.39  
0.14  
0.33  
0.21  
0.38  
0.37  
0.2  
0.18  
0.25  
0.17  
0.2  
0.16

0.35  
0.24  
0.31  
0.29  
0.18  
0.33  
0.29  
0.38  
0.29  
0.39  
0.38  
0.4  
0.31  
0.29  
0.4  
0.38  
0.37  
0.28  
0.39  
0.33  
0.23  
0.4  
0.33  
0.37  
0  
0.32  
0.31  
0.18  
0.19  
0.21  
0.32  
0.36  
0.3  
0.11  
0.27  
0.14  
0.36  
0.02  
0.4  
0.39  
0.29  
0.4  
0.39  
0.39  
0.38  
0.1  
0.28  
0.4  
0.22  
0.2  
0.38  
0.35  
0.27

0.39  
0.25  
0.28  
0.34  
0.4  
0.36  
0.39  
0.32  
0.38  
0.29  
0  
0.4  
0.21  
0.19  
0.33  
0.26  
0.31  
0.17  
0.4  
0.39  
0.4  
0.38  
0.16  
0.36  
0.29  
0.35  
0.39  
0.23  
0.11  
0.37  
0.39  
0.11  
0.3  
0.28  
0.4  
0.32  
0.17  
0.21  
0.38  
0.39  
0.3  
0.1  
0.26  
0.38  
0.27  
0.37  
0.23  
0.23  
0.32  
0.37  
0.4  
0.34  
0.4

0.38  
0.19  
0.38  
0.37  
0.29  
0.38  
0.4  
0.39  
0.29  
0.36  
0.39  
0.28  
0.38  
0.31  
0.28  
0.2  
0.39  
0.39  
0.33  
0.39  
0.38  
0.1  
0.24  
0.38  
0.28  
0.31  
0.38  
0.39  
0.22  
0.35  
0.32  
0.37  
0.3  
0.33  
0.27  
0.36  
0.21  
0.08  
0.23  
0.4  
0.16  
0.28  
0.27  
0.4  
0.19  
0.4  
0.37  
0.33  
0.4  
0.16  
0.37  
0.35  
0.28

0.35  
0.4  
0.35  
0.19  
0.27  
0  
0.39  
0.27  
0.34  
0.4  
0.35  
0.37  
0.28  
0.4  
0.14  
0.26  
0.33  
0.23  
0.21  
0.11  
0.4  
0.4  
0.38  
0.32  
0.36  
0.23  
0.18  
0.3  
0.4  
0.36  
0.34  
0.37  
0.37  
0.2  
0.34  
0.37  
0.37  
0.35  
0.29  
0.36  
0.29  
0.38  
0.36  
0.33  
0.39  
0.35  
0.3  
0.4  
0.34  
0.4  
0.4  
0.37  
0.33



0.32  
0.26  
0.3  
0.4  
0.4  
0.21  
0.19  
0.29  
0.35  
0.36  
0.31  
0.32  
0.21  
0.25  
0.15  
0.31  
0.19  
0.13  
0.19  
0.16  
0.38  
0.13  
0.25  
0.35  
0.24  
0.37  
0.16  
0.07  
0.4  
0.06  
0.32  
0.22  
0.12  
0.09  
0.12  
0.1  
0.31  
0.38  
0.33  
0.37  
0.33  
0.31  
0.34  
0.38  
0.4  
0.29  
0.4  
0.3  
0.1  
0.11  
0.23  
0.36  
0.4

0.25  
0.3  
0.18  
0.25  
0.36  
0.18  
0.4  
0.4  
0.33  
0.39  
0.36  
0.39  
0.38  
0.3  
0.17  
0.3  
0.34  
0.36  
0.27  
0.2  
0.19  
0.14  
0.2  
0.36  
0.38  
0.14  
0.34  
0.33  
0.37  
0.28  
0.4  
0.35  
0.31  
0.22  
0.3  
0.22  
0.32  
0.39  
0.4  
0.3  
0  
0.27  
0.35  
0.16  
0.34  
0.2  
0.29  
0.34  
0.37  
0.22  
0.38  
0.35  
0.37

0.4  
0.38  
0.34  
0.25  
0.36  
0.17  
0.29  
0.25  
0.3  
0.2  
0.16  
0.13  
0.24  
0.36  
0.38  
0.35  
0.38  
0.34  
0.29  
0.36  
0.14  
0.29  
0.4  
0.39  
0.29  
0.34  
0.33  
0.31  
0.29  
0.11  
0.14  
0.29  
0.3  
0.31  
0.23  
0.39  
0.22  
0.28  
0.31  
0.4  
0.4  
0.31  
0.3  
0.32  
0.37  
0.33  
0.24  
0.23  
0.23  
0.11  
0.33  
0.34  
0.39

0.38  
0.37  
0.4  
0.25  
0.36  
0.23  
0.4  
0.39  
0.36  
0.32  
0.3  
0.16  
0.35  
0.37  
0.37  
0.09  
0.14  
0.13  
0.14  
0.32  
0.39  
0.36  
0.39  
0.16  
0.23  
0.36  
0.27  
0.36  
0.33  
0.18  
0.38  
0.34  
0.38  
0.39  
0.39  
0.36  
0.39  
0.4  
0.25  
0.32  
0.32  
0.39  
0  
0.32  
0.33  
0.39  
0.18  
0.4  
0.23  
0.21  
0.38  
0.39  
0.15

0.25  
0.36  
0.28  
0.32  
0  
0.4  
0.29  
0.18  
0.37  
0.34  
0.37  
0.33  
0.39  
0.1  
0.21  
0.38  
0.36  
0.33  
0.3  
0.32  
0.4  
0.4  
0.2  
0.18  
0.09  
0.14  
0.16  
0.38  
0.38  
0.4  
0.28  
0.35  
0.33  
0.24  
0.21  
0.4  
0.32  
0.19  
0.4  
0.36  
0.38  
0.32  
0.14  
0.23  
0.36  
0.17  
0.34  
0.11  
0.27  
0.33  
0.35  
0.34  
0.2

0.35  
0.39  
0.3  
0.3  
0.27  
0.38  
0.39  
0.37  
0.28  
0.29  
0.3  
0.39  
0.4  
0.14  
0.32  
0.37  
0.37  
0.38  
0.39  
0.15  
0.33  
0.24  
0.2  
0.4  
0.3  
0.05  
0.14  
0  
0.37  
0.22  
0.09  
0.23  
0.39  
0.32  
0.31  
0.24  
0.38  
0.3  
0.4  
0.4  
0.06  
0  
0.36  
1  
0.4  
0.4  
0.38  
0.23  
0.34  
0.39  
0.1  
0.4  
0.32

0.33  
0.22  
0.33  
0.12  
0.26  
0.28  
0.28  
0.39  
0.16  
0.4  
0.25  
0.39  
0.21  
0.38  
0.38  
0.22  
0.31  
0.24  
0.31  
0.37  
0.25  
0.29  
0.35  
0.16  
0  
0.26  
0.4  
0.37  
0.3  
0.34  
0.38  
0.4  
0.06  
0.15  
0.23  
0.34  
0.17  
0.27  
0.29  
0.39  
0  
0.12  
0.23  
0  
0.2  
0.36  
0  
0.34  
0.37  
0.17  
0.38  
0.24  
0.33

0.4  
0.35  
0.36  
0.39  
0.39  
0.39  
0.33  
0.19  
0.36  
0.4  
0.4  
0.33  
0.12  
0.35  
0.39  
0.25  
0.38  
0.33  
0.17  
0.38  
0.35  
0.21  
0.28  
0.28  
0.27  
0.39  
0.38  
0.39  
0.19  
0.38  
0.4  
0.15  
0.33  
0.07  
0.15  
0.37  
0.07  
0.29  
0.24  
0.39  
0.24  
0.25  
0.31  
0.27  
0.16  
0.23  
0.4  
0.25  
0.27  
0.36  
0.29  
0.03  
0.4



0.21  
0.27  
0.32  
0.37  
0.23  
0.1  
0.3  
0.39  
0.38  
0.3  
0.33  
0.36  
0.35  
0.4  
0.31  
0.38  
0.37  
0.36  
0.27  
0.36  
0.36  
0.16  
0.4  
0.33  
0.39  
0.34  
0.36  
0.39  
0.4  
0.4  
0.33  
0.38  
0.34  
0.19  
0.37  
0.12  
0  
0.15  
0.3  
0.36  
0.11  
0.11  
0.28  
0.38  
0.07  
0.38  
0.38  
0.17  
0.39  
0.36  
0.4  
0.21  
0.27

0.19  
0.4  
0.25  
0.07  
0.38  
0.26  
0.22  
0.38  
0.39  
0.4  
0.34  
0.39  
0.32  
0.4  
0.34  
0.22  
0.13  
0.25  
0.33  
0.4  
0.39  
0.4  
0.35  
0  
0.31  
0.36  
0.36  
0.39  
0.12  
0.38  
0.22  
0.18  
0.29  
0.2  
0.23  
0.35  
0.39  
0.37  
0.39  
0.29  
0.19  
0.32  
0.26  
0.29  
0.37  
0.31  
0.11  
0.2  
0.31  
0.2  
0.09  
0.27  
0.36

0.24  
0.29  
0.35  
0.19  
0.16  
0.39  
0.34  
0.38  
0.35  
0.4  
0.28  
0.33  
0.38  
0.07  
0.38  
0.39  
0.34  
0.4  
0.21  
0.08  
0.38  
0.36  
0.04  
0.36  
0.31  
0.37  
0.12  
0.15  
0.25  
0.29  
0.37  
0.38  
0.33  
0.38  
0.33  
0.21  
0.04  
0.4  
0.38  
0.22  
0.39  
0.2  
0.34  
0.19  
0.38  
0.39  
0.38  
0.28  
0.14  
0.07  
0.4  
0.26  
0.36

0.36  
0.35  
0.2  
0.25  
0.38  
0.39  
0.1  
0.27  
0.25  
0.26  
0.25  
0.39  
0.09  
0.19  
0.25  
0.14  
0.04  
0.75  
0.4  
0.34  
0.4  
0.27  
0.33  
0.37  
0.34  
0.26  
0.34  
0.77  
0.14  
0.34  
0.14  
0.37  
0.35  
0.26  
0.28  
0.26  
0.22  
0.39  
0.22  
0.4  
0.39  
0.1  
0.38  
0.31  
0.4  
0.4  
0.19  
0.34  
0.29  
0.31  
0.25  
0.37  
0.39

0.31  
0.35  
0.04  
0.12  
0.04  
0.08  
0.39  
0.15  
0.13

**Supplemental Table S4.** Endosperm-preferred genes and the differentially methy

| Gene          | CG | CHG | CHH | Embryo(EN) | endosperm(EM) | log2(EM/EN) |
|---------------|----|-----|-----|------------|---------------|-------------|
| 27436.m000284 | -  | -   | -   | 0.43       | 99.85         | 7.86        |
| 27451.m000241 | +  | -   | -   | 2.26       | 19.73         | 3.13        |
| 27451.m000242 | -  | -   | -   | 0.98       | 7.85          | 3.00        |
| 27561.m000301 | -  | +   | -   | 0.16       | 2.61          | 4.05        |
| 27568.m000259 | -  | -   | -   | 0.53       | 6.05          | 3.50        |
| 27613.m000641 | -  | -   | -   | 1.08       | 14.61         | 3.76        |
| 27623.m000142 | -  | -   | +   | 4.34       | 25.52         | 2.55        |
| 27637.m000173 | -  | -   | -   | 2.00       | 11.62         | 2.54        |
| 27647.m000177 | +  | -   | -   | 5.80       | 56.55         | 3.28        |
| 27758.m000330 | +  | -   | -   | 1.09       | 9.03          | 3.05        |
| 27847.m000125 | -  | -   | -   | 0.42       | 20.99         | 5.63        |
| 27894.m000807 | +  | +   | -   | 1.10       | 7.08          | 2.68        |
| 27894.m000811 | -  | -   | -   | 2.76       | 14.40         | 2.38        |
| 27964.m000368 | +  | -   | -   | 0.15       | 104.48        | 9.42        |
| 27965.m000111 | -  | -   | -   | 0.10       | 2.68          | 4.72        |
| 27973.m000087 | +  | -   | -   | 1.31       | 5.71          | 2.12        |
| 28008.m000029 | +  | -   | -   | 2.14       | 54.47         | 4.67        |
| 28053.m000048 | -  | -   | +   | 24.25      | 98.52         | 2.02        |
| 28076.m000418 | +  | -   | -   | 0.41       | 2.01          | 2.30        |
| 28128.m000155 | +  | -   | -   | 3.24       | 61.37         | 4.25        |
| 28151.m000042 | +  | -   | -   | 27.02      | 129.69        | 2.26        |
| 28152.m000889 | -  | -   | -   | 3.13       | 18.59         | 2.57        |
| 28153.m000288 | -  | -   | -   | 5.60       | 33.52         | 2.58        |
| 28166.m001040 | +  | -   | -   | 6.13       | 27.18         | 2.15        |
| 28166.m001086 | -  | -   | -   | 0.00       | 3.91          | 11.93       |
| 28176.m000269 | -  | -   | -   | 1.43       | 13.66         | 3.26        |
| 28179.m000457 | -  | -   | -   | 1.01       | 12.03         | 3.58        |
| 28200.m000191 | -  | -   | -   | 0.22       | 277.21        | 10.29       |
| 28200.m000193 | -  | -   | -   | 1.50       | 11.82         | 2.98        |
| 28226.m000860 | -  | -   | -   | 0.15       | 9.36          | 6.01        |
| 28226.m000871 | +  | -   | -   | 7.11       | 40.28         | 2.50        |
| 28256.m000134 | -  | +   | -   | 1.89       | 116.91        | 5.95        |
| 28297.m000110 | -  | -   | -   | 1.97       | 8.59          | 2.13        |
| 28333.m000569 | +  | +   | -   | 4.98       | 34.57         | 2.80        |
| 28408.m000201 | -  | -   | -   | 0.53       | 4.24          | 3.00        |
| 28460.m000082 | +  | -   | -   | 0.45       | 15.98         | 5.15        |
| 28470.m000429 | +  | -   | -   | 0.81       | 242.91        | 8.22        |
| 28498.m000207 | +  | -   | -   | 0.68       | 4.04          | 2.57        |
| 28535.m000123 | +  | -   | -   | 1.66       | 6.95          | 2.07        |
| 28583.m000107 | +  | -   | -   | 2.78       | 13.35         | 2.26        |
| 28592.m000275 | -  | -   | -   | 0.75       | 3.18          | 2.08        |
| 28603.m000172 | +  | -   | -   | 0.48       | 18.88         | 5.31        |
| 28611.m000105 | +  | -   | -   | 0.44       | 3.68          | 3.05        |

|               |   |   |   |      |        |       |
|---------------|---|---|---|------|--------|-------|
| 28612.m000118 | + | - | - | 0.66 | 30.59  | 5.53  |
| 28612.m000119 | + | - | - | 6.37 | 145.79 | 4.52  |
| 28629.m000553 | + | - | - | 2.56 | 10.89  | 2.09  |
| 28629.m000565 | + | - | + | 0.04 | 137.31 | 11.75 |
| 28657.m000380 | - | - | - | 0.00 | 5.95   | 12.54 |
| 28694.m000667 | - | - | - | 0.23 | 4.23   | 4.21  |
| 28694.m000675 | + | - | - | 3.22 | 25.64  | 2.99  |
| 28694.m000676 | - | + | - | 6.21 | 37.43  | 2.59  |
| 28883.m000729 | - | - | - | 0.64 | 4.39   | 2.78  |
| 28883.m000741 | - | - | - | 0.05 | 34.93  | 9.45  |
| 28952.m000016 | - | + | - | 0.11 | 4.65   | 5.44  |
| 28966.m000545 | + | - | - | 4.88 | 27.18  | 2.48  |
| 29093.m000078 | - | - | - | 0.56 | 5.09   | 3.18  |
| 29172.m000217 | - | + | - | 1.68 | 8.11   | 2.27  |
| 29200.m000170 | - | - | - | 4.10 | 16.72  | 2.03  |
| 29269.m000250 | - | - | - | 0.44 | 10.21  | 4.53  |
| 29308.m000182 | - | - | - | 0.25 | 3.10   | 3.65  |
| 29333.m001097 | + | - | - | 5.33 | 25.68  | 2.27  |
| 29428.m000332 | + | - | - | 1.10 | 4.60   | 2.07  |
| 29462.m000387 | - | - | - | 4.97 | 21.87  | 2.14  |
| 29489.m000174 | - | + | - | 1.87 | 11.66  | 2.64  |
| 29497.m000089 | + | - | - | 2.22 | 8.90   | 2.00  |
| 29585.m000601 | + | - | - | 0.57 | 6.32   | 3.47  |
| 29588.m000878 | - | - | - | 0.05 | 133.18 | 11.39 |
| 29589.m001234 | + | - | - | 0.96 | 22.77  | 4.57  |
| 29595.m000287 | + | - | - | 1.04 | 4.40   | 2.08  |
| 29598.m000464 | + | - | - | 2.00 | 28.33  | 3.82  |
| 29598.m000465 | - | - | - | 0.45 | 3.77   | 3.06  |
| 29599.m000177 | - | - | - | 4.40 | 22.21  | 2.34  |
| 29600.m000545 | - | - | - | 3.65 | 19.24  | 2.40  |
| 29610.m000393 | + | - | - | 0.00 | 7.70   | 12.91 |
| 29610.m000402 | + | - | - | 1.24 | 5.58   | 2.17  |
| 29611.m000231 | + | - | - | 3.39 | 19.77  | 2.54  |
| 29619.m000249 | + | - | - | 0.52 | 2.16   | 2.06  |
| 29620.m000534 | - | - | - | 0.17 | 6.34   | 5.21  |
| 29620.m000557 | + | - | - | 1.28 | 9.98   | 2.96  |
| 29624.m000320 | - | - | - | 1.33 | 5.82   | 2.13  |
| 29625.m000702 | + | - | - | 5.57 | 29.73  | 2.42  |
| 29628.m000766 | + | - | - | 0.14 | 2.00   | 3.85  |
| 29629.m001402 | + | - | - | 2.16 | 9.02   | 2.06  |
| 29630.m000783 | - | - | - | 0.66 | 2.72   | 2.04  |
| 29631.m001014 | + | - | - | 3.39 | 36.47  | 3.43  |
| 29631.m001021 | + | - | - | 0.37 | 2.00   | 2.46  |
| 29633.m000898 | - | - | - | 0.52 | 2.68   | 2.37  |
| 29634.m002144 | - | - | - | 0.77 | 5.38   | 2.80  |

|               |   |   |   |       |         |       |
|---------------|---|---|---|-------|---------|-------|
| 29634.m002146 | - | - | - | 0.00  | 8.46    | 13.05 |
| 29637.m000766 | + | - | - | 0.52  | 2.56    | 2.30  |
| 29646.m001067 | - | - | - | 0.00  | 3.40    | 11.73 |
| 29647.m002044 | - | - | - | 0.51  | 4.64    | 3.20  |
| 29647.m002090 | - | - | - | 6.39  | 101.93  | 4.00  |
| 29647.m002113 | - | - | - | 1.15  | 53.53   | 5.54  |
| 29648.m001921 | - | - | - | 0.37  | 95.66   | 8.00  |
| 29648.m001944 | + | - | - | 2.42  | 14.80   | 2.62  |
| 29648.m001971 | - | - | - | 0.46  | 4.14    | 3.18  |
| 29648.m001976 | - | - | - | 0.58  | 17.82   | 4.95  |
| 29648.m002017 | + | - | - | 0.79  | 3.97    | 2.32  |
| 29650.m000277 | + | - | - | 2.66  | 13.78   | 2.37  |
| 29653.m000293 | - | - | - | 0.26  | 5.73    | 4.45  |
| 29656.m000476 | - | - | - | 4.55  | 48.57   | 3.42  |
| 29662.m000457 | + | - | - | 1.19  | 7.51    | 2.65  |
| 29662.m000461 | - | - | - | 0.11  | 5.25    | 5.59  |
| 29666.m001479 | + | - | - | 0.00  | 10.83   | 13.40 |
| 29669.m000814 | + | - | - | 6.43  | 69.84   | 3.44  |
| 29669.m000827 | - | - | - | 0.79  | 4.71    | 2.57  |
| 29676.m001645 | + | - | - | 0.48  | 18.87   | 5.28  |
| 29676.m001698 | - | - | - | 2.04  | 11.94   | 2.55  |
| 29676.m001704 | + | - | - | 8.42  | 38.88   | 2.21  |
| 29678.m000501 | - | - | - | 0.07  | 21.46   | 8.23  |
| 29678.m000510 | + | - | - | 0.51  | 4.89    | 3.27  |
| 29680.m001664 | - | - | - | 12.98 | 183.16  | 3.82  |
| 29681.m001333 | + | - | - | 1.68  | 11.12   | 2.72  |
| 29681.m001352 | + | - | - | 0.27  | 4.65    | 4.13  |
| 29683.m000472 | - | - | - | 1.25  | 22.03   | 4.14  |
| 29684.m000322 | + | - | - | 18.93 | 103.25  | 2.45  |
| 29685.m000501 | - | - | - | 0.37  | 5.73    | 3.96  |
| 29685.m000502 | + | - | - | 0.56  | 12.49   | 4.47  |
| 29685.m000504 | - | - | - | 2.08  | 8.95    | 2.10  |
| 29687.m000591 | - | - | - | 1.96  | 16.66   | 3.08  |
| 29693.m002070 | + | - | - | 0.48  | 2.58    | 2.42  |
| 29696.m000101 | + | - | - | 2.72  | 19.73   | 2.86  |
| 29700.m000758 | + | - | - | 1.80  | 13.66   | 2.92  |
| 29709.m001226 | + | - | - | 1.23  | 21.63   | 4.13  |
| 29713.m000178 | + | - | - | 0.60  | 4.12    | 2.77  |
| 29719.m000328 | + | - | - | 0.59  | 6.71    | 3.49  |
| 29724.m000825 | - | - | - | 3.55  | 312.88  | 6.46  |
| 29726.m003897 | - | - | - | 0.00  | 19.02   | 14.22 |
| 29726.m003928 | - | - | - | 0.00  | 5.45    | 12.41 |
| 29726.m004005 | + | - | - | 9.87  | 44.62   | 2.18  |
| 29726.m004094 | + | - | + | 25.21 | 1657.25 | 6.04  |
| 29728.m000836 | + | - | - | 1.52  | 6.41    | 2.08  |



|               |   |   |   |       |        |       |
|---------------|---|---|---|-------|--------|-------|
| 29729.m002275 | - | - | - | 0.15  | 3.81   | 4.66  |
| 29729.m002277 | + | - | - | 2.65  | 21.40  | 3.01  |
| 29729.m002296 | - | - | - | 0.00  | 2.78   | 11.44 |
| 29729.m002358 | - | - | - | 0.65  | 5.34   | 3.05  |
| 29729.m002376 | + | - | - | 0.33  | 2.86   | 3.11  |
| 29737.m001209 | + | + | - | 5.59  | 26.04  | 2.22  |
| 29737.m001226 | + | - | - | 1.26  | 5.67   | 2.17  |
| 29739.m003573 | + | - | - | 1.73  | 12.15  | 2.82  |
| 29739.m003595 | + | - | - | 0.00  | 9.09   | 13.15 |
| 29739.m003673 | + | - | - | 0.13  | 11.58  | 6.47  |
| 29739.m003776 | - | - | - | 0.68  | 10.23  | 3.91  |
| 29740.m000490 | - | - | - | 0.65  | 3.00   | 2.20  |
| 29742.m001408 | + | - | - | 0.74  | 4.17   | 2.49  |
| 29743.m000296 | + | - | - | 6.88  | 30.02  | 2.13  |
| 29745.m000372 | - | - | - | 0.35  | 4.58   | 3.71  |
| 29747.m001071 | - | - | - | 2.34  | 19.43  | 3.06  |
| 29751.m001801 | + | - | - | 3.06  | 62.60  | 4.35  |
| 29751.m001876 | + | - | - | 0.00  | 2.94   | 11.52 |
| 29756.m000489 | - | - | - | 0.59  | 3.03   | 2.35  |
| 29758.m000670 | - | - | - | 0.00  | 2.31   | 11.18 |
| 29764.m000758 | + | + | - | 9.65  | 51.22  | 2.41  |
| 29765.m000748 | + | - | - | 2.86  | 11.81  | 2.05  |
| 29767.m000199 | - | - | - | 3.67  | 48.35  | 3.72  |
| 29772.m000319 | - | - | - | 0.27  | 4.91   | 4.20  |
| 29776.m000477 | + | - | - | 0.20  | 8.38   | 5.36  |
| 29776.m000485 | - | + | - | 4.87  | 21.49  | 2.14  |
| 29780.m001394 | - | - | - | 0.49  | 7.72   | 3.97  |
| 29782.m000116 | + | - | - | 2.55  | 15.31  | 2.59  |
| 29783.m000308 | - | + | - | 0.12  | 14.22  | 6.85  |
| 29783.m000319 | + | - | - | 0.00  | 76.34  | 16.22 |
| 29785.m000970 | + | - | - | 38.25 | 169.28 | 2.15  |
| 29794.m003336 | - | - | - | 2.62  | 18.75  | 2.84  |
| 29794.m003393 | - | - | - | 0.12  | 25.77  | 7.73  |
| 29794.m003435 | + | - | - | 3.15  | 67.60  | 4.42  |
| 29794.m003463 | + | - | - | 1.68  | 11.50  | 2.78  |
| 29797.m000356 | + | - | - | 0.22  | 15.95  | 6.19  |
| 29799.m000632 | - | - | - | 0.00  | 2.35   | 11.20 |
| 29801.m003065 | + | - | - | 2.14  | 148.86 | 6.12  |
| 29801.m003069 | + | - | - | 42.31 | 198.29 | 2.23  |
| 29801.m003122 | + | - | - | 11.32 | 56.23  | 2.31  |
| 29801.m003147 | - | - | - | 5.73  | 42.07  | 2.88  |
| 29801.m003167 | + | - | - | 1.20  | 16.40  | 3.78  |
| 29801.m003168 | + | - | - | 1.25  | 19.97  | 4.00  |
| 29801.m003169 | - | - | - | 0.40  | 2.26   | 2.51  |
| 29801.m003176 | + | - | - | 4.69  | 37.28  | 2.99  |

|               |   |   |   |       |        |       |
|---------------|---|---|---|-------|--------|-------|
| 29804.m001474 | - | - | - | 0.25  | 2.07   | 3.03  |
| 29804.m001508 | + | - | - | 0.59  | 2.68   | 2.17  |
| 29804.m001532 | - | - | - | 0.90  | 4.97   | 2.47  |
| 29804.m001550 | + | - | - | 1.11  | 8.59   | 2.96  |
| 29804.m001551 | + | - | - | 16.90 | 79.56  | 2.24  |
| 29805.m001484 | + | - | - | 11.71 | 50.63  | 2.11  |
| 29805.m001492 | + | - | - | 4.21  | 19.99  | 2.25  |
| 29805.m001494 | - | - | - | 0.66  | 7.49   | 3.50  |
| 29805.m001504 | + | - | - | 0.45  | 2.63   | 2.54  |
| 29806.m000978 | + | - | - | 0.26  | 21.45  | 6.36  |
| 29806.m000979 | - | - | - | 1.45  | 6.13   | 2.08  |
| 29807.m000474 | - | - | - | 0.05  | 6.12   | 6.93  |
| 29812.m000202 | - | - | - | 0.00  | 2.32   | 11.18 |
| 29813.m001524 | + | - | - | 0.85  | 4.32   | 2.34  |
| 29813.m001533 | + | - | - | 0.24  | 3.28   | 3.79  |
| 29814.m000714 | + | - | - | 5.01  | 50.63  | 3.34  |
| 29814.m000715 | + | - | - | 15.88 | 130.02 | 3.03  |
| 29816.m000668 | + | - | - | 1.02  | 4.51   | 2.14  |
| 29819.m000079 | - | - | - | 7.52  | 39.15  | 2.38  |
| 29820.m000995 | - | - | - | 3.37  | 19.16  | 2.51  |
| 29820.m001015 | - | - | - | 0.11  | 4.74   | 5.45  |
| 29820.m001029 | + | - | - | 0.26  | 10.39  | 5.35  |
| 29822.m003337 | + | - | - | 0.27  | 3.09   | 3.53  |
| 29822.m003341 | - | - | - | 0.42  | 2.01   | 2.27  |
| 29822.m003348 | + | - | - | 0.24  | 2.78   | 3.51  |
| 29822.m003397 | - | - | - | 0.00  | 25.82  | 14.66 |
| 29822.m003405 | - | - | - | 0.37  | 2.08   | 2.49  |
| 29822.m003484 | - | - | - | 0.08  | 3.39   | 5.32  |
| 29822.m003512 | - | - | - | 0.10  | 4.27   | 5.35  |
| 29826.m000736 | - | - | - | 0.19  | 3.69   | 4.25  |
| 29827.m002572 | + | - | - | 11.90 | 50.34  | 2.08  |
| 29827.m002592 | + | - | - | 3.29  | 33.51  | 3.35  |
| 29827.m002621 | + | - | - | 0.42  | 2.89   | 2.76  |
| 29827.m002623 | + | - | - | 0.75  | 3.86   | 2.36  |
| 29827.m002624 | - | - | - | 1.85  | 9.65   | 2.38  |
| 29827.m002648 | + | - | - | 0.99  | 4.88   | 2.30  |
| 29827.m002655 | - | - | - | 0.30  | 54.71  | 7.50  |
| 29832.m000324 | + | - | - | 0.51  | 5.43   | 3.40  |
| 29835.m000648 | + | - | - | 0.04  | 8.83   | 7.86  |
| 29835.m000658 | - | - | - | 0.67  | 3.36   | 2.33  |
| 29838.m001634 | - | - | - | 0.51  | 5.07   | 3.31  |
| 29841.m002754 | + | - | - | 0.38  | 3.99   | 3.38  |
| 29841.m002780 | + | - | - | 0.30  | 3.33   | 3.45  |
| 29841.m002825 | + | - | - | 0.50  | 15.47  | 4.94  |
| 29841.m002847 | + | - | - | 18.35 | 73.66  | 2.00  |

|               |   |   |   |       |         |       |
|---------------|---|---|---|-------|---------|-------|
| 29841.m002903 | - | - | - | 4.33  | 41.50   | 3.26  |
| 29842.m003537 | - | - | - | 0.74  | 5.04    | 2.76  |
| 29842.m003541 | + | - | - | 0.84  | 3.39    | 2.01  |
| 29842.m003581 | - | - | - | 90.91 | 366.54  | 2.01  |
| 29844.m003163 | + | - | - | 1.09  | 19.66   | 4.17  |
| 29844.m003187 | + | - | - | 0.08  | 13.53   | 7.40  |
| 29844.m003212 | - | - | - | 0.80  | 13.97   | 4.13  |
| 29844.m003242 | + | - | - | 1.63  | 7.93    | 2.28  |
| 29844.m003332 | - | - | - | 8.77  | 57.48   | 2.71  |
| 29844.m003335 | + | - | - | 3.77  | 31.15   | 3.05  |
| 29844.m003349 | + | - | - | 3.58  | 15.75   | 2.14  |
| 29848.m004574 | - | - | - | 4.59  | 24.99   | 2.44  |
| 29848.m004661 | + | - | - | 2.09  | 8.63    | 2.05  |
| 29848.m004680 | + | - | - | 1.89  | 2258.37 | 10.22 |
| 29851.m002370 | + | - | - | 0.46  | 9.73    | 4.39  |
| 29851.m002416 | + | - | - | 2.98  | 17.04   | 2.52  |
| 29854.m001091 | + | - | - | 0.73  | 2.92    | 2.01  |
| 29854.m001136 | - | - | - | 0.00  | 150.84  | 17.20 |
| 29862.m000333 | - | + | - | 0.12  | 4.38    | 5.23  |
| 29863.m001056 | + | - | - | 0.22  | 3.30    | 3.90  |
| 29864.m001464 | + | - | - | 1.76  | 11.98   | 2.77  |
| 29877.m000488 | - | - | - | 2.71  | 11.50   | 2.09  |
| 29887.m000231 | + | - | - | 0.45  | 3.15    | 2.82  |
| 29889.m003246 | - | - | - | 7.52  | 32.40   | 2.11  |
| 29889.m003402 | - | - | - | 0.75  | 10.23   | 3.77  |
| 29897.m000372 | + | - | - | 1.98  | 12.00   | 2.60  |
| 29900.m001562 | - | - | - | 0.00  | 8.95    | 13.13 |
| 29900.m001630 | + | - | - | 0.00  | 2.61    | 11.35 |
| 29901.m000415 | + | - | - | 0.14  | 21.89   | 7.25  |
| 29904.m002916 | - | - | - | 0.14  | 6.29    | 5.50  |
| 29904.m002927 | + | - | - | 6.14  | 273.25  | 5.48  |
| 29904.m002936 | + | - | - | 5.67  | 47.87   | 3.08  |
| 29904.m002951 | + | - | - | 1.38  | 8.84    | 2.68  |
| 29904.m002974 | - | - | - | 1.76  | 33.00   | 4.23  |
| 29905.m000425 | + | - | - | 0.00  | 5.75    | 12.49 |
| 29907.m000627 | - | - | - | 0.64  | 3.14    | 2.28  |
| 29907.m000652 | + | - | - | 0.08  | 355.51  | 12.04 |
| 29908.m006032 | + | - | - | 0.22  | 7.34    | 5.04  |
| 29908.m006057 | - | - | - | 14.68 | 77.70   | 2.40  |
| 29908.m006112 | - | - | - | 1.94  | 12.51   | 2.69  |
| 29908.m006144 | - | - | - | 0.02  | 6.91    | 8.42  |
| 29908.m006149 | + | - | - | 2.92  | 11.72   | 2.00  |
| 29910.m000957 | + | - | - | 0.40  | 3.94    | 3.29  |
| 29912.m005318 | - | - | - | 0.19  | 8.90    | 5.53  |
| 29912.m005328 | + | - | - | 19.05 | 79.40   | 2.06  |

|               |   |   |   |       |        |       |
|---------------|---|---|---|-------|--------|-------|
| 29912.m005390 | - | - | - | 0.17  | 3.64   | 4.45  |
| 29912.m005537 | - | - | - | 0.44  | 34.81  | 6.30  |
| 29912.m005583 | + | - | - | 7.14  | 34.78  | 2.28  |
| 29914.m000199 | - | - | - | 2.80  | 11.75  | 2.07  |
| 29917.m001963 | + | - | - | 0.03  | 5.79   | 7.79  |
| 29917.m001964 | - | - | - | 0.46  | 2.80   | 2.62  |
| 29917.m002005 | + | - | - | 1.56  | 8.29   | 2.41  |
| 29917.m002007 | + | - | - | 0.52  | 2.86   | 2.45  |
| 29927.m000593 | + | - | - | 1.40  | 8.78   | 2.65  |
| 29927.m000594 | + | - | - | 1.11  | 5.04   | 2.18  |
| 29929.m004505 | - | - | - | 1.19  | 8.46   | 2.83  |
| 29929.m004627 | + | - | - | 0.29  | 2.15   | 2.87  |
| 29929.m004758 | + | - | - | 1.97  | 15.90  | 3.01  |
| 29929.m004764 | - | - | - | 1.98  | 27.41  | 3.79  |
| 29929.m004802 | + | - | - | 0.57  | 44.27  | 6.28  |
| 29933.m001455 | + | - | - | 2.99  | 17.95  | 2.59  |
| 29940.m000397 | + | - | - | 1.96  | 9.13   | 2.22  |
| 29948.m000692 | - | - | - | 1.05  | 5.92   | 2.49  |
| 29949.m000124 | + | - | - | 5.92  | 26.26  | 2.15  |
| 29950.m001178 | - | - | - | 0.00  | 2.77   | 11.44 |
| 29957.m001411 | - | - | - | 1.17  | 11.89  | 3.35  |
| 29957.m001427 | + | - | - | 2.63  | 10.71  | 2.02  |
| 29958.m000939 | - | - | - | 18.33 | 107.47 | 2.55  |
| 29970.m000980 | + | - | - | 2.19  | 20.50  | 3.23  |
| 29975.m000754 | + | - | - | 2.61  | 14.98  | 2.52  |
| 29975.m000755 | + | - | - | 0.77  | 5.61   | 2.86  |
| 29976.m000508 | - | - | - | 5.79  | 31.93  | 2.46  |
| 29983.m003116 | - | - | - | 0.05  | 3.11   | 6.01  |
| 29983.m003152 | - | - | - | 1.13  | 20.00  | 4.14  |
| 29983.m003169 | + | - | - | 0.00  | 14.62  | 13.84 |
| 29983.m003264 | + | - | - | 1.61  | 6.81   | 2.08  |
| 29986.m001641 | - | - | - | 0.50  | 3.48   | 2.81  |
| 29990.m000507 | - | + | - | 0.12  | 2.18   | 4.23  |
| 29991.m000626 | - | - | - | 14.13 | 134.04 | 3.25  |
| 29991.m000629 | + | - | - | 0.25  | 4.91   | 4.27  |
| 29993.m001035 | + | - | - | 1.02  | 15.78  | 3.94  |
| 30000.m000371 | - | - | - | 4.44  | 23.70  | 2.42  |
| 30008.m000792 | + | - | - | 0.66  | 4.58   | 2.79  |
| 30010.m000662 | - | - | - | 0.00  | 3.25   | 11.66 |
| 30017.m000315 | - | + | - | 0.34  | 7.30   | 4.43  |
| 30024.m001753 | + | - | - | 3.45  | 14.43  | 2.06  |
| 30026.m001464 | + | - | - | 0.16  | 14.92  | 6.57  |
| 30028.m000252 | - | - | - | 0.73  | 2.99   | 2.04  |
| 30028.m000253 | - | - | - | 7.56  | 41.56  | 2.46  |
| 30032.m000457 | - | - | - | 21.41 | 105.38 | 2.30  |

|               |   |   |   |       |        |       |
|---------------|---|---|---|-------|--------|-------|
| 30054.m000794 | - | - | - | 0.95  | 7.45   | 2.98  |
| 30055.m001541 | + | - | - | 91.63 | 626.01 | 2.77  |
| 30055.m001575 | + | - | - | 1.66  | 7.65   | 2.20  |
| 30055.m001587 | - | - | - | 0.42  | 133.70 | 8.31  |
| 30055.m001588 | - | - | - | 0.28  | 7.41   | 4.71  |
| 30055.m001634 | - | - | - | 0.57  | 3.44   | 2.59  |
| 30056.m000859 | + | - | - | 0.00  | 3.70   | 11.86 |
| 30059.m000476 | + | - | - | 0.45  | 2.38   | 2.40  |
| 30063.m001420 | - | - | - | 2.49  | 12.50  | 2.33  |
| 30063.m001435 | + | - | - | 0.60  | 2.57   | 2.10  |
| 30064.m000489 | - | - | - | 0.00  | 2.26   | 11.15 |
| 30068.m002552 | + | - | - | 0.46  | 3.55   | 2.95  |
| 30068.m002670 | - | - | - | 23.38 | 98.89  | 2.08  |
| 30069.m000439 | + | - | - | 0.57  | 7.63   | 3.74  |
| 30070.m000117 | - | + | - | 0.61  | 3.54   | 2.53  |
| 30071.m000434 | + | - | - | 6.12  | 24.83  | 2.02  |
| 30071.m000450 | + | - | - | 0.34  | 2.71   | 2.98  |
| 30072.m000947 | - | + | - | 7.32  | 37.02  | 2.34  |
| 30073.m002214 | - | - | - | 0.00  | 5.61   | 12.45 |
| 30073.m002236 | - | + | - | 1.19  | 8.26   | 2.80  |
| 30073.m002241 | + | - | - | 3.97  | 17.07  | 2.11  |
| 30073.m002247 | - | + | - | 0.19  | 9.56   | 5.67  |
| 30073.m002256 | + | + | + | 3.74  | 17.05  | 2.19  |
| 30074.m001338 | - | - | - | 2.06  | 8.65   | 2.07  |
| 30074.m001377 | + | - | - | 0.30  | 2.03   | 2.75  |
| 30075.m001134 | + | - | - | 0.78  | 10.59  | 3.77  |
| 30076.m004489 | - | - | - | 0.30  | 2.50   | 3.06  |
| 30076.m004587 | + | + | - | 0.09  | 3.70   | 5.40  |
| 30076.m004616 | - | - | - | 0.09  | 62.43  | 9.44  |
| 30078.m002250 | + | - | - | 0.93  | 3.85   | 2.05  |
| 30078.m002281 | - | - | - | 3.31  | 18.74  | 2.50  |
| 30078.m002295 | + | - | - | 0.69  | 3.16   | 2.19  |
| 30079.m000454 | + | - | - | 7.70  | 33.05  | 2.10  |
| 30089.m001013 | - | - | - | 0.00  | 2.67   | 11.38 |
| 30090.m000241 | - | - | - | 0.00  | 3.34   | 11.71 |
| 30090.m000247 | + | - | - | 0.00  | 3.27   | 11.67 |
| 30093.m000370 | + | + | - | 0.25  | 157.63 | 9.31  |
| 30094.m000684 | + | - | - | 1.03  | 6.05   | 2.55  |
| 30098.m001713 | - | - | - | 1.11  | 5.24   | 2.24  |
| 30098.m001714 | + | - | - | 1.53  | 7.26   | 2.25  |
| 30099.m001661 | + | + | - | 0.21  | 4.34   | 4.40  |
| 30099.m001662 | - | - | - | 0.17  | 3.41   | 4.31  |
| 30099.m001695 | + | + | - | 0.58  | 2.51   | 2.11  |
| 30099.m001696 | - | - | - | 0.40  | 3.44   | 3.09  |
| 30100.m000783 | - | + | - | 17.20 | 161.01 | 3.23  |

|               |   |   |   |       |        |       |
|---------------|---|---|---|-------|--------|-------|
| 30101.m000371 | - | - | - | 0.16  | 4.74   | 4.90  |
| 30106.m000644 | - | - | - | 42.57 | 226.87 | 2.41  |
| 30106.m000653 | + | + | - | 0.05  | 4.17   | 6.34  |
| 30110.m000727 | - | - | - | 3.22  | 13.36  | 2.05  |
| 30111.m000701 | + | - | - | 1.73  | 9.67   | 2.48  |
| 30111.m000718 | - | - | - | 0.84  | 22.20  | 4.73  |
| 30111.m000734 | - | - | - | 2.07  | 22.52  | 3.44  |
| 30111.m000739 | - | - | - | 11.90 | 72.28  | 2.60  |
| 30113.m001441 | + | - | - | 0.52  | 4.45   | 3.08  |
| 30114.m000508 | - | - | - | 1.46  | 15.37  | 3.40  |
| 30115.m001213 | - | - | - | 1.01  | 8.82   | 3.12  |
| 30115.m001255 | - | - | - | 3.26  | 18.05  | 2.47  |
| 30128.m008540 | + | - | - | 9.05  | 51.01  | 2.50  |
| 30128.m008544 | + | - | - | 0.72  | 3.13   | 2.11  |
| 30128.m008545 | - | - | - | 0.38  | 17.45  | 5.53  |
| 30128.m008553 | + | - | - | 3.31  | 14.29  | 2.11  |
| 30128.m008555 | + | - | - | 1.15  | 4.80   | 2.06  |
| 30128.m008558 | - | + | - | 8.37  | 38.40  | 2.20  |
| 30128.m008581 | - | - | - | 0.33  | 2.41   | 2.87  |
| 30128.m008611 | + | - | - | 3.30  | 20.97  | 2.67  |
| 30128.m008613 | - | - | - | 0.29  | 5.92   | 4.37  |
| 30128.m008654 | + | - | - | 0.10  | 3.41   | 5.16  |
| 30128.m008743 | + | - | - | 0.19  | 21.00  | 6.77  |
| 30128.m008744 | + | - | - | 33.90 | 142.26 | 2.07  |
| 30128.m008774 | - | - | - | 1.49  | 6.66   | 2.16  |
| 30128.m008946 | - | - | - | 0.14  | 3.94   | 4.82  |
| 30129.m000374 | - | - | - | 3.16  | 15.85  | 2.32  |
| 30131.m006854 | - | - | - | 2.93  | 12.45  | 2.09  |
| 30131.m006894 | - | - | - | 0.92  | 10.35  | 3.50  |
| 30131.m006912 | + | - | - | 0.00  | 8.73   | 13.09 |
| 30131.m006952 | - | - | - | 1.29  | 7.04   | 2.45  |
| 30131.m007007 | + | - | - | 1.62  | 19.17  | 3.57  |
| 30131.m007023 | + | - | - | 0.07  | 56.51  | 9.56  |
| 30131.m007024 | - | - | - | 2.76  | 16.30  | 2.56  |
| 30131.m007056 | - | - | - | 0.91  | 4.20   | 2.21  |
| 30131.m007097 | - | - | - | 1.81  | 28.63  | 3.99  |
| 30131.m007132 | + | - | - | 0.08  | 5.24   | 5.95  |
| 30131.m007137 | + | - | - | 0.91  | 12.52  | 3.78  |
| 30131.m007142 | - | - | - | 3.64  | 14.78  | 2.02  |
| 30131.m007207 | - | - | - | 0.22  | 4.01   | 4.20  |
| 30131.m007239 | - | - | - | 5.67  | 131.43 | 4.53  |
| 30131.m007269 | - | - | - | 1.18  | 22.73  | 4.26  |
| 30131.m007275 | - | - | - | 4.05  | 16.28  | 2.01  |
| 30131.m007283 | + | - | - | 1.61  | 12.54  | 2.96  |
| 30131.m007290 | + | - | - | 0.15  | 18.87  | 7.02  |

|               |   |   |   |       |       |       |
|---------------|---|---|---|-------|-------|-------|
| 30136.m001054 | + | - | - | 0.36  | 2.36  | 2.71  |
| 30138.m003850 | + | - | - | 2.68  | 20.00 | 2.90  |
| 30138.m003899 | - | - | - | 10.33 | 65.85 | 2.67  |
| 30138.m003979 | + | - | - | 2.50  | 15.56 | 2.64  |
| 30142.m000643 | - | - | - | 2.23  | 9.18  | 2.04  |
| 30143.m001194 | - | - | - | 9.38  | 46.99 | 2.32  |
| 30143.m001220 | + | - | - | 1.69  | 10.59 | 2.65  |
| 30146.m003560 | + | - | - | 0.94  | 12.50 | 3.74  |
| 30146.m003588 | + | - | - | 0.70  | 4.94  | 2.82  |
| 30147.m013777 | + | - | - | 2.07  | 11.89 | 2.52  |
| 30147.m013779 | - | - | - | 1.63  | 8.08  | 2.31  |
| 30147.m013800 | + | - | - | 0.85  | 3.73  | 2.14  |
| 30147.m013903 | - | - | - | 1.35  | 6.74  | 2.32  |
| 30147.m013923 | + | - | - | 0.00  | 2.54  | 11.31 |
| 30147.m013924 | + | - | - | 1.77  | 12.66 | 2.83  |
| 30147.m013967 | + | - | - | 1.64  | 18.50 | 3.50  |
| 30147.m014047 | - | - | - | 0.27  | 2.69  | 3.30  |
| 30147.m014186 | - | - | - | 3.19  | 26.92 | 3.08  |
| 30147.m014204 | - | - | - | 0.00  | 12.24 | 13.58 |
| 30147.m014233 | + | - | - | 0.20  | 2.70  | 3.74  |
| 30147.m014251 | + | - | - | 6.47  | 77.70 | 3.59  |
| 30147.m014313 | - | - | - | 0.60  | 10.48 | 4.12  |
| 30147.m014346 | - | - | - | 0.15  | 3.26  | 4.44  |
| 30147.m014368 | + | - | - | 3.93  | 17.36 | 2.14  |
| 30147.m014396 | + | - | - | 1.25  | 17.41 | 3.80  |
| 30147.m014416 | - | - | - | 0.67  | 3.89  | 2.54  |
| 30147.m014472 | - | - | - | 0.53  | 5.51  | 3.37  |
| 30147.m014532 | + | - | - | 0.25  | 2.91  | 3.53  |
| 30148.m001484 | - | - | - | 0.79  | 4.72  | 2.59  |
| 30150.m000482 | + | - | - | 0.64  | 8.60  | 3.74  |
| 30154.m001142 | - | - | - | 0.28  | 2.47  | 3.14  |
| 30160.m000435 | + | - | - | 0.07  | 18.44 | 7.94  |
| 30162.m001262 | + | - | - | 0.59  | 3.24  | 2.47  |
| 30169.m006241 | - | - | - | 6.06  | 25.53 | 2.07  |
| 30169.m006243 | + | - | - | 4.38  | 18.05 | 2.04  |
| 30169.m006408 | + | - | - | 1.03  | 5.11  | 2.32  |
| 30169.m006437 | - | - | - | 0.51  | 4.34  | 3.08  |
| 30169.m006462 | - | - | - | 1.81  | 9.41  | 2.38  |
| 30169.m006465 | - | - | - | 0.74  | 6.53  | 3.15  |
| 30169.m006507 | - | - | - | 0.70  | 4.32  | 2.64  |
| 30169.m006542 | + | - | - | 0.08  | 5.10  | 6.05  |
| 30170.m013644 | - | - | - | 0.33  | 2.31  | 2.81  |
| 30170.m013711 | + | - | - | 0.00  | 56.06 | 15.77 |
| 30170.m013718 | - | - | - | 0.00  | 2.22  | 11.11 |
| 30170.m013729 | + | - | - | 5.17  | 48.56 | 3.23  |

|               |   |   |   |        |         |       |
|---------------|---|---|---|--------|---------|-------|
| 30170.m013754 | - | - | - | 95.38  | 595.34  | 2.64  |
| 30170.m013762 | - | - | - | 1.05   | 6.39    | 2.61  |
| 30170.m013784 | - | + | - | 0.18   | 3.43    | 4.27  |
| 30170.m013802 | + | - | - | 2.36   | 19.03   | 3.01  |
| 30170.m013812 | + | - | - | 1.21   | 8.12    | 2.75  |
| 30170.m013923 | - | - | - | 1.29   | 5.86    | 2.18  |
| 30170.m013931 | - | - | - | 0.15   | 4.35    | 4.81  |
| 30170.m014003 | - | - | - | 7.35   | 30.14   | 2.04  |
| 30170.m014008 | - | - | - | 7.54   | 31.49   | 2.06  |
| 30170.m014074 | - | - | - | 15.92  | 72.77   | 2.19  |
| 30170.m014085 | + | - | - | 0.00   | 2.93    | 11.52 |
| 30170.m014122 | - | - | - | 0.75   | 3.78    | 2.34  |
| 30170.m014137 | - | - | - | 0.12   | 3.66    | 4.99  |
| 30170.m014204 | + | - | - | 2.64   | 11.30   | 2.10  |
| 30170.m014276 | + | - | - | 0.14   | 78.46   | 9.14  |
| 30174.m008633 | + | - | - | 4.17   | 23.83   | 2.51  |
| 30174.m008641 | + | - | - | 0.26   | 3.31    | 3.65  |
| 30174.m008646 | - | - | - | 3.77   | 87.56   | 4.54  |
| 30174.m008663 | - | - | - | 0.41   | 22.34   | 5.77  |
| 30174.m009001 | + | - | - | 0.00   | 10.45   | 13.35 |
| 30174.m009022 | + | - | - | 2.67   | 31.14   | 3.54  |
| 30174.m009028 | - | - | - | 0.23   | 2.38    | 3.35  |
| 30174.m009044 | - | - | - | 2.64   | 11.21   | 2.09  |
| 30174.m009122 | + | - | - | 0.23   | 6.67    | 4.86  |
| 30182.m000135 | - | - | - | 2.19   | 11.33   | 2.37  |
| 30185.m000921 | + | + | - | 232.99 | 1012.44 | 2.12  |
| 30185.m000956 | - | - | - | 2.83   | 24.23   | 3.10  |
| 30190.m010845 | + | - | - | 1.04   | 4.21    | 2.02  |
| 30190.m010925 | + | - | - | 0.09   | 3.14    | 5.09  |
| 30190.m010926 | + | - | - | 1.10   | 37.74   | 5.11  |
| 30190.m010965 | + | - | - | 1.80   | 7.81    | 2.12  |
| 30190.m011000 | + | - | - | 0.48   | 4.60    | 3.27  |
| 30190.m011027 | - | - | - | 0.11   | 2.23    | 4.34  |
| 30190.m011038 | - | - | - | 0.08   | 2.34    | 4.96  |
| 30190.m011058 | + | + | - | 4.37   | 20.77   | 2.25  |
| 30190.m011101 | - | - | - | 0.00   | 41.23   | 15.33 |
| 30190.m011113 | + | - | - | 1.17   | 11.12   | 3.25  |
| 30190.m011167 | + | - | - | 25.50  | 108.88  | 2.09  |
| 30190.m011202 | + | - | - | 0.00   | 11.33   | 13.47 |
| 30190.m011223 | + | - | - | 0.00   | 2.21    | 11.11 |
| 30190.m011224 | + | - | - | 0.26   | 2.18    | 3.07  |
| 30190.m011266 | - | - | - | 4.94   | 67.94   | 3.78  |
| 30193.m000700 | - | - | - | 0.12   | 23.73   | 7.60  |
| 30193.m000706 | + | + | - | 1.55   | 10.96   | 2.82  |



|               |   |   |   |       |        |       |
|---------------|---|---|---|-------|--------|-------|
| 30193.m000721 | - | - | - | 0.66  | 7.85   | 3.57  |
| 30200.m000351 | - | + | - | 0.00  | 3.76   | 11.88 |
| 30205.m001597 | + | - | - | 0.30  | 3.89   | 3.68  |
| 30205.m001612 | + | - | - | 19.42 | 102.35 | 2.40  |
| 30208.m001102 | - | - | - | 3.77  | 28.11  | 2.90  |
| 30209.m001514 | + | + | - | 0.96  | 4.36   | 2.19  |
| 30213.m000676 | + | + | + | 0.35  | 29.54  | 6.38  |
| 30217.m000254 | + | - | - | 0.94  | 9.57   | 3.34  |
| 30221.m002232 | + | - | - | 0.13  | 7.72   | 5.92  |
| 30223.m000144 | - | - | - | 2.25  | 9.08   | 2.01  |
| 30225.m001719 | - | - | - | 0.67  | 2.98   | 2.16  |
| 30225.m001722 | - | + | - | 2.95  | 11.80  | 2.00  |
| 30226.m002042 | - | - | - | 13.36 | 60.37  | 2.18  |
| 30226.m002047 | + | - | - | 3.16  | 15.09  | 2.26  |
| 31177.m000029 | - | - | - | 4.34  | 22.35  | 2.37  |
| 31518.m000032 | + | - | - | 8.25  | 42.70  | 2.37  |
| 34500.m000016 | + | - | - | 0.65  | 6.35   | 3.30  |
| 48455.m000013 | + | - | - | 1.32  | 6.13   | 2.22  |
| 54190.m000015 | + | - | - | 3.58  | 31.39  | 3.13  |
| 54248.m000013 | + | - | - | 1.05  | 5.34   | 2.34  |
| 58361.m000013 | + | - | - | 5.95  | 28.18  | 2.24  |

/lated regions in each sequence context.

---

Annotation

---

alcohol dehydrogenase, putative  
conserved hypothetical protein  
hypothetical protein  
conserved hypothetical protein  
conserved hypothetical protein  
nucleic acid binding protein, putative  
Esterase PIR7B, putative  
receptor protein kinase, putative  
conserved hypothetical protein  
conserved hypothetical protein  
peptide transporter, putative  
zinc finger protein, putative  
conserved hypothetical protein  
calmodulin binding protein, putative  
zinc finger protein, putative  
N-acetyltransferase, putative  
DNA-binding protein RAV1, putative  
Calcium-binding allergen Ole e, putative  
Protein SUA5, putative  
Troponin C, skeletal muscle, putative  
conserved hypothetical protein  
protein phosphatase 2c, putative  
PAC, putative  
Chitin-inducible gibberellin-responsive protein, putative  
Pectinesterase-2 precursor, putative  
Transcription factor HBP-1b, putative  
DNA binding protein, putative  
Axial regulator YABBY1, putative  
multicopper oxidase, putative  
hypothetical protein  
serine/threonine protein kinase, putative  
cytochrome P450, putative  
CBL-interacting serine/threonine-protein kinase, putative  
serine hydroxymethyltransferase, putative  
conserved hypothetical protein  
short-chain dehydrogenase, putative  
GAST1 protein precursor, putative  
conserved hypothetical protein  
catalytic, putative  
ATP binding protein, putative  
t7n9.7, putative  
asymmetric leaves1 and rough sheath, putative  
Phytoene synthase, chloroplast precursor, putative

lrr receptor protein kinase, putative  
lrr receptor protein kinase, putative  
abc transporter, putative  
Beta-fructofuranosidase  
conserved hypothetical protein  
chaperonin-60kD, ch60, putative  
beta-galactosidase, putative  
RNA binding protein, putative  
histidine kinase 1 plant, putative  
Transcription factor HBP-1b(c1), putative  
nucleic acid binding protein, putative  
methylenetetrahydrofolate reductase, putative  
Protein MLO, putative  
prolyl 4-hydroxylase alpha subunit, putative  
oxidoreductase, putative  
LIGULELESS1 protein, putative  
conserved hypothetical protein  
cell division cycle, putative  
pentatricopeptide repeat-containing protein, putative  
conserved hypothetical protein  
pheophorbide A oxygenase, putative  
ATP binding protein, putative  
conserved hypothetical protein  
Vegetative cell wall protein gp1 precursor, putative  
metal ion binding protein, putative  
Protein kinase APK1B, chloroplast precursor, putative  
conserved hypothetical protein  
conserved hypothetical protein  
Auxin response factor, putative  
glutamate receptor 3 plant, putative  
conserved hypothetical protein  
transcription factor, putative  
ubiquitin-protein ligase, putative  
conserved hypothetical protein  
calcium ion binding protein, putative  
Triacylglycerol lipase 2 precursor, putative  
60S ribosomal protein L44, putative  
DNA binding protein, putative  
Major pollen allergen Ory s 1 precursor, putative  
ribosomal RNA small subunit methyltransferase B, putative  
pentatricopeptide repeat-containing protein, putative  
polygalacturonase, putative  
nucleoredoxin, putative  
hypothetical protein  
aldo/keto reductase, putative

GATA transcription factor, putative  
phosphatidylcholine acyltransferase, putative  
Serine/threonine-protein kinase HT1, putative  
gtpase activating protein, putative  
conserved hypothetical protein  
DNA binding protein, putative  
Basic blue protein, putative  
ATP binding protein, putative  
hypothetical protein  
ganglioside-induced differentiation-associated protein 1, 2 gdap, putative  
conserved hypothetical protein  
short-chain dehydrogenase, putative  
ATP-binding cassette transporter, putative  
conserved hypothetical protein  
conserved hypothetical protein  
conserved hypothetical protein  
hypothetical protein  
conserved hypothetical protein  
conserved hypothetical protein  
multicopper oxidase, putative  
conserved hypothetical protein  
protein binding protein, putative  
alcohol dehydrogenase, putative  
UDP-glucosyltransferase, putative  
synovial sarcoma associated ss18 protein, putative  
villin 1-4, putative  
conserved hypothetical protein  
hypothetical protein  
eukaryotic translation initiation factor 2c, putative  
conserved hypothetical protein  
conserved hypothetical protein  
conserved hypothetical protein  
hypothetical protein  
Carboxyl-terminal-processing protease precursor, putative  
ATP binding protein, putative  
conserved hypothetical protein  
receptor protein kinase, putative  
acyl-CoA oxidase, putative  
conserved hypothetical protein  
Major latex allergen Hev b, putative  
Amine oxidase [copper-containing] precursor, putative  
Transcription elongation factor, putative  
acyl-CoA binding protein, putative  
AP2/ERF transcription factor  
f12k21.25, putative

conserved hypothetical protein  
ferritin, plant, putative  
Nodulation receptor kinase precursor, putative  
Protein LRP16, putative  
conserved hypothetical protein  
conserved hypothetical protein  
calmodulin binding protein, putative  
conserved hypothetical protein  
conserved hypothetical protein  
conserved hypothetical protein  
conserved hypothetical protein  
hypothetical protein  
molybdopterin cofactor synthesis protein A, putative  
DNA gyrase subunit A, chloroplast/mitochondrial precursor, putative  
Kinesin-II 85 kDa subunit, putative  
hypothetical protein  
conserved hypothetical protein  
kinase, putative  
Non-imprinted in Prader-Willi/Angelman syndrome region protein, putative  
conserved hypothetical protein  
transcription factor, putative  
bromodomain-containing protein, putative  
asymmetric leaves1 and rough sheath, putative  
ATP-binding cassette transporter, putative  
peptidase, putative  
conserved hypothetical protein  
conserved hypothetical protein  
serine-threonine protein kinase, plant-type, putative  
sterol desaturase, putative  
Glycine-rich cell wall structural protein 1 precursor, putative  
tubulin beta chain, putative  
bell homeotic protein, putative  
DNA binding protein, putative  
conserved hypothetical protein  
hypothetical protein  
class I chitinase, putative  
hypothetical protein  
GAST1 protein precursor, putative  
brg-1 associated factor, putative  
protein binding protein, putative  
Myosin heavy chain, fast skeletal muscle, embryonic, putative  
kinase, putative  
conserved hypothetical protein  
Xylem serine proteinase 1 precursor, putative  
DNA binding protein, putative

conserved hypothetical protein  
Glutathione-regulated potassium-efflux system protein kefB, putative  
hypothetical protein  
conserved hypothetical protein  
hypothetical protein  
ATP binding protein, putative  
L-ascorbate peroxidase, cytosolic, putative  
Floral homeotic protein APETALA2, putative  
conserved hypothetical protein  
Methionine S-methyltransferase, putative  
ATP-dependent clp protease ATP-binding subunit clpx, putative  
conserved hypothetical protein  
Cysteine and glycine-rich protein, putative  
conserved hypothetical protein  
Ribulose-1,5 biphosphate carboxylase/oxygenase large subunit N-methyltransferase, chloroplast precu  
hypothetical protein  
transcription factor, putative  
Nicotinate-nucleotide pyrophosphorylase [carboxylating], putative  
Urease accessory protein ureH, putative  
ferritin, plant, putative  
conserved hypothetical protein  
transcription factor, putative  
conserved hypothetical protein  
conserved hypothetical protein  
conserved hypothetical protein  
conserved hypothetical protein  
extensin, proline-rich protein, putative  
arsenite inducible RNA associated protein aip-1, putative  
WRKY transcription factor, putative  
ATP-dependent helicase, putative  
Oligopeptide transporter, putative  
Maintenance of ploidy protein mob1, putative  
conserved hypothetical protein  
conserved hypothetical protein  
conserved hypothetical protein  
mixed-lineage leukemia protein, mll, putative  
aberrant large forked product, putative  
electron carrier, putative  
conserved hypothetical protein  
acetyl-CoA synthetase, putative  
pheophorbide A oxygenase, putative  
nutrient reservoir, putative  
cyclin A, putative  
conserved hypothetical protein  
Polygalacturonase precursor, putative  
phopholipase d alpha, putative

glycerol kinase, putative  
Serine/threonine-protein kinase PBS1, putative  
similarity to receptor protein kinase, putative  
lactoylglutathione lyase, putative  
hypothetical protein  
acyltransferase, putative  
eukaryotic translation initiation factor 2c, putative  
protein kinase atmrk1, putative  
ccaat-binding transcription factor, putative  
conserved hypothetical protein  
conserved hypothetical protein  
hypothetical protein  
Acyl-protein thioesterase, putative  
lipid binding protein, putative  
conserved hypothetical protein  
transferase, transferring glycosyl groups, putative  
pentatricopeptide repeat-containing protein, putative  
Axial regulator YABBY2, putative  
conserved hypothetical protein  
conserved hypothetical protein  
cinnamoyl-CoA reductase, putative  
short-chain dehydrogenase, putative  
conserved hypothetical protein  
Protein COBRA precursor, putative  
conserved hypothetical protein  
hypothetical protein  
zinc finger protein, putative  
o-methyltransferase, putative  
cytochrome P450, putative  
conserved hypothetical protein  
protein binding protein, putative  
conserved hypothetical protein  
zinc finger protein, putative  
DNA photolyase, putative  
conserved hypothetical protein  
purine biosynthesis protein 7, pur7, putative  
conserved hypothetical protein  
conserved hypothetical protein  
TMV resistance protein N, putative  
conserved hypothetical protein  
WD-repeat protein, putative

conserved hypothetical protein  
hypothetical protein  
1-deoxyxylulose-5-phosphate synthase, putative  
conserved hypothetical protein  
ARF GTPase activator, putative  
conserved hypothetical protein  
serine/threonine protein kinase, putative  
ubiquitin-protein ligase, putative  
Protein kinase APK1B, chloroplast precursor, putative  
conserved hypothetical protein  
alcohol dehydrogenase, putative  
conserved hypothetical protein  
Alpha-L-fucosidase 2 precursor, putative  
steroid dehydrogenase, putative  
cytochrome P450, putative  
conserved hypothetical protein  
Thylakoid lumenal 29.8 kDa protein, chloroplast precursor, putative  
conserved hypothetical protein  
Chitin-inducible gibberellin-responsive protein, putative  
syntaxin, arabidopsis thaliana, putative  
LOB domain-containing protein, putative  
hypothetical protein  
Cell elongation protein diminuto, putative  
cyclin d, putative  
eukaryotic translation initiation factor 2c, putative  
eukaryotic translation initiation factor 2c, putative  
RAB6-interacting protein, putative  
conserved hypothetical protein  
protein phosphatase 2c, putative  
conserved hypothetical protein  
conserved hypothetical protein  
RING-H2 finger protein ATL3L, putative  
leucine-rich repeat-containing protein, putative  
Phosphatidylcholine: Diacylglycerol Acyltransferase  
conserved hypothetical protein  
conserved hypothetical protein  
transcription factor, putative  
hypothetical protein  
Glycine-rich cell wall structural protein 1 precursor, putative  
conserved hypothetical protein  
Phytochromobilin:ferredoxin oxidoreductase, chloroplast precursor, putative  
hypothetical protein  
Protein kinase APK1B, chloroplast precursor, putative  
Protein kinase APK1A, chloroplast precursor, putative  
Nitrilase, putative



ribose-phosphate pyrophosphokinase, putative  
poly [ADP-ribose] polymerase, putative  
gtpase activating protein, putative  
conserved hypothetical protein  
conserved hypothetical protein  
ATP binding protein, putative  
conserved hypothetical protein  
conserved hypothetical protein  
conserved hypothetical protein  
conserved hypothetical protein  
ferric-chelate reductase, putative  
zinc finger protein, putative  
bhlh transcription factor, putative  
conserved hypothetical protein  
hypothetical protein  
hypothetical protein  
Single-stranded DNA-binding protein, mitochondrial precursor, putative  
hypothetical protein  
cationic amino acid transporter, putative  
conserved hypothetical protein  
cytochrome P450, putative  
er lumen protein retaining receptor, putative  
conserved hypothetical protein  
Cellulose synthase A catalytic subunit 3 [UDP-forming], putative  
glycerophosphoryl diester phosphodiesterase, putative  
serine/threonine-protein kinase cx32, putative  
nucleic acid binding protein, putative  
conserved hypothetical protein  
short chain alcohol dehydrogenase, putative  
long-chain-fatty-acid CoA ligase, putative  
rab1, putative  
amino acid binding protein, putative  
conserved hypothetical protein  
protein phosphatase 2c, putative  
conserved hypothetical protein  
conserved hypothetical protein  
zinc ion binding protein, putative  
Flavin-binding monooxygenase  
serine carboxypeptidase, putative  
fad NAD binding oxidoreductases, putative  
conserved hypothetical protein  
conserved hypothetical protein  
conserved hypothetical protein  
conserved hypothetical protein  
hypothetical protein  
Cell elongation protein diminuto, putative

electron transporter, putative  
conserved hypothetical protein  
UDP-glucosyltransferase, putative  
chloroplast 30S ribosomal protein S7, putative  
retinal degeneration B beta, putative  
cinnamoyl-CoA reductase, putative  
Auxin response factor, putative  
conserved hypothetical protein  
hypothetical protein  
conserved hypothetical protein  
DNA binding protein, putative  
Myosin-9, putative  
hypothetical protein  
pentatricopeptide repeat-containing protein, putative  
transcription factor, putative  
histone-lysine n-methyltransferase, suvh, putative  
RNA-binding protein, putative  
zinc finger protein, putative  
zinc finger protein, putative  
conserved hypothetical protein  
calmodulin binding protein, putative  
ATP binding protein, putative  
D-erythro-sphingosine kinase, putative  
chloroplast-targeted copper chaperone, putative  
conserved hypothetical protein  
conserved hypothetical protein  
Small rubber particle protein, putative  
multidrug resistance-associated protein, putative  
Aspartic proteinase nepenthesin-1 precursor, putative  
serine/threonine protein kinase, putative  
diphosphoinositol polyphosphate phosphohydrolase, putative  
transcription factor, putative  
double-stranded RNA binding protein, putative  
zinc finger protein, putative  
hypothetical protein  
Purple acid phosphatase precursor, putative  
ATP binding protein, putative  
conserved hypothetical protein  
dfg10 protein, putative  
DNA binding protein, putative  
conserved hypothetical protein  
Aspartic proteinase nepenthesin-1 precursor, putative  
conserved hypothetical protein  
conserved hypothetical protein  
alpha-galactosidase/alpha-n-acetylgalactosaminidase, putative

conserved hypothetical protein  
BRASSINOSTEROID INSENSITIVE 1-associated receptor kinase 1 precursor, putative  
conserved hypothetical protein  
conserved hypothetical protein  
cytochrome P450, putative  
delta 1-pyrroline-5-carboxylate synthetase, putative  
lipid binding protein, putative  
AMP dependent CoA ligase, putative  
conserved hypothetical protein  
short chain type dehydrogenase, putative  
hypothetical protein  
sentrin/sumo-specific protease, putative  
conserved hypothetical protein  
homeobox protein knotted-1, putative  
nucleotide binding protein, putative  
Polygalacturonase-1 non-catalytic subunit beta precursor, putative  
HIPL1 protein precursor, putative  
leucine rich repeat receptor kinase, putative  
21 kDa protein precursor, putative  
Structural maintenance of chromosome, putative  
conserved hypothetical protein  
Dehydration-responsive element-binding protein 1A, putative  
histone-lysine n-methyltransferase, suvh, putative  
superoxide dismutase [fe], putative  
electron transporter, putative  
gcn4-complementing protein, putative  
conserved hypothetical protein  
leucine-rich repeat protein, putative  
conserved hypothetical protein  
ATP binding protein, putative  
conserved hypothetical protein  
ctp synthase, putative  
conserved hypothetical protein  
short-chain dehydrogenase, putative  
conserved hypothetical protein  
ank repeat-containing protein, putative  
GTP-binding protein enga, putative  
poly(p)/ATP NAD kinase, putative  
ATP-binding cassette transporter, putative  
receptor serine/threonine kinase, putative  
Ethylene-responsive transcription factor, putative  
hydrolase, hydrolyzing O-glycosyl compounds, putative  
Glucan endo-1,3-beta-glucosidase precursor, putative  
copper transport protein atox1, putative  
Calmodulin, putative

conserved hypothetical protein  
Xylem serine proteinase 1 precursor, putative  
serine-threonine protein kinase, plant-type, putative  
conserved hypothetical protein  
electron transporter, putative  
conserved hypothetical protein  
conserved hypothetical protein  
conserved hypothetical protein  
protein phosphatase 2c, putative  
glucose-1-phosphate adenylyltransferase, putative  
transcription factor, putative  
cysteine protease, putative  
f10a5.16, putative  
dead box ATP-dependent RNA helicase, putative  
Alpha-expansin 11 precursor, putative  
syntaxin, putative  
conserved hypothetical protein  
polygalacturonase, putative  
WRKY transcription factor, putative  
r2r3-myb transcription factor, putative  
60S ribosomal protein L36e, putative  
Beta-amylase, putative  
uridine cytidine kinase I, putative  
ATP binding protein, putative  
conserved hypothetical protein  
chloroplast 30S ribosomal protein S7, putative  
Auxin response factor, putative  
conserved hypothetical protein  
conserved hypothetical protein  
conserved hypothetical protein  
conserved hypothetical protein  
21 kDa protein precursor, putative  
conserved hypothetical protein  
conserved hypothetical protein  
sodium-bile acid cotransporter, putative  
homeobox protein knotted-1, putative  
DNA-directed RNA polymerase, putative  
hypothetical protein  
synaptotagmin, putative  
transcription factor, putative  
gibberellin 20-oxidase, putative  
heat shock protein, putative  
glutamyl-tRNA(gln) amidotransferase subunit A, putative  
conserved hypothetical protein

beta-galactosidase, putative  
hypothetical protein  
conserved hypothetical protein  
sterol desaturase, putative  
RNA binding protein, putative  
conserved hypothetical protein  
receptor protein kinase, putative  
DNA binding protein, putative  
expressed protein, putative  
conserved hypothetical protein  
conserved hypothetical protein  
GTP-binding protein lepa, putative  
conserved hypothetical protein  
calcium-dependent protein kinase, putative  
hypothetical protein  
Thermostable beta-glucosidase B, putative  
conserved hypothetical protein  
hypothetical protein  
conserved hypothetical protein  
conserved hypothetical protein  
hypothetical protein











ursor, putative

1 **Supplemental Table S5.** Primers used in this study for gene expression profiles based  
2 on qPCR.

3

| Gene name | Forward primer: 5'-3' | Reverse primer: 5'-3'  |
|-----------|-----------------------|------------------------|
| RcMET1-1  | TAATGGAGCCCCTTTCCGT   | AGGTGACCATGTTCCCTCGAA  |
| RcMET1-2  | CAGTCCGTGAATGTGCTCGAT | CAAGTGCAAATGCCAGAGGAG  |
| RcCMT-1   | TTTCCTGGCGTGTTAGTTGGT | ACGTCCCACGAACAAACGA    |
| RcCMT-2   | ACCATCTGAAAAGCCACTGGT | GGATGTAACATTGCCTGGCTG  |
| RcDMR-1   | TTTCAGGTTGACACGGTTGCT | TACTTCAGCTCCACCAATGCC  |
| RcDMR-2   | GCAGAAGTTGCTTTACACCGC | CAATCTGCTCCAATTCCCA    |
| RcDMR-3   | TTGCTGATGTGCATGACCTGA | ATCTCGATGGTGTGCGTTGCT  |
| RcDnmt2   | TGCATTCTTTCCCAAGGAC   | ATGGCCAGCCGACATACAGTA  |
| RcDME     | ACAACATGCTAGCCGAACGAA | CGCACTCCACGCTTTTCAA    |
| RcROS1    | TTGGTCAACTGCCACTTCCTC | TGTATGCGCTCTGGTTCTGGT  |
| RcDML3    | TACCGAGACCAGATCGCAATG | CCACGGACGGTTTCAGTTCTT  |
| RcActin2  | TTGGAATGGAAGCTGCAGGA  | CCTTGCTCATAACGGTCTGCAA |

4
